# Supplementary material for: Transcription analyses of differentially expressed mRNAs, lncRNAs, circRNAs, and miRNAs in the growth plate of rats with glucocorticoid-induced growth retardation
Source: PeerJ. 2023 Jan 16;11:e14603. doi: 10.7717/peerj.14603 (PMC9851049; doi:10.7717/peerj.14603)
Supplement: Supplemental Information 1 [file peerj-11-14603-s001.xlsx]

## Sheet: Dex 7d group (up-regulated) 
Table S1. The up-regulated gene sets in the Dex 7d group. Gene sets with nominal p<0.05 and FDR < 0.25 are remained and sorted in descending order by │NES│.
Gene Set	SIZE	ES	NES	NOM p-val	FDR q-val	FWER p-val	RANK AT MAX	LEADING EDGE
TGF-beta signaling pathway	98	0.518633	1.81934	0	0.0597982	0.047	4705	tags=52%, list=21%, signal=66%
Cortisol synthesis and secretion	68	0.544888	1.78807	0	0.0391043	0.061	4032	tags=35%, list=18%, signal=43%
Complement and coagulation cascades	92	0.505243	1.75392	0	0.0392984	0.092	3644	tags=37%, list=16%, signal=44%
Glycosaminoglycan biosynthesis - heparan sulfate / heparin	24	0.640251	1.72315	0	0.0450488	0.137	6179	tags=67%, list=28%, signal=92%
Signaling pathways regulating pluripotency of stem cells	146	0.445469	1.6556	0	0.0809375	0.283	5505	tags=46%, list=25%, signal=60%
Basal cell carcinoma	65	0.502536	1.64532	0.00505051	0.0737364	0.306	3347	tags=37%, list=15%, signal=43%
Mannose type O-glycan biosyntheis	24	0.60561	1.62516	0.0165485	0.0792798	0.375	4814	tags=46%, list=21%, signal=58%
Prion diseases	33	0.574662	1.622	0.018018	0.0724199	0.386	3574	tags=39%, list=16%, signal=47%
Steroid hormone biosynthesis	76	0.473035	1.59331	0.00540541	0.0842137	0.46	4183	tags=20%, list=19%, signal=24%
Glycosaminoglycan biosynthesis - chondroitin sulfate / dermatan sulfate	21	0.614225	1.58579	0.0188679	0.0836816	0.492	2357	tags=43%, list=10%, signal=48%
Collecting duct acid secretion	30	0.565238	1.58501	0.0120482	0.0764198	0.494	5239	tags=53%, list=23%, signal=69%
Mucin type O-glycan biosynthesis	29	0.570915	1.58024	0.00913242	0.074148	0.512	3811	tags=41%, list=17%, signal=50%
Hippo signaling pathway	160	0.410265	1.54726	0.0028169	0.0958349	0.63	3999	tags=36%, list=18%, signal=44%
Arrhythmogenic right ventricular cardiomyopathy (ARVC)	81	0.453878	1.54073	0.00514139	0.0940521	0.652	4250	tags=48%, list=19%, signal=59%
Ovarian Steroidogenesis	58	0.468954	1.5207	0.0168067	0.103451	0.707	4503	tags=34%, list=20%, signal=43%
Circadian rhythm	30	0.531363	1.51279	0.0261905	0.103116	0.726	1137	tags=27%, list=5%, signal=28%
Other types of O-glycan biosynthesis	44	0.50691	1.51085	0.0150376	0.0987705	0.731	3598	tags=39%, list=16%, signal=46%
Hedgehog signaling pathway	47	0.490564	1.50854	0.0223325	0.0951211	0.738	3309	tags=38%, list=15%, signal=45%
PPAR signaling pathway	90	0.427445	1.49272	0.00793651	0.103168	0.787	4788	tags=33%, list=21%, signal=42%
Ether lipid metabolism	46	0.480861	1.46932	0.028436	0.118101	0.858	5438	tags=50%, list=24%, signal=66%
Cushing syndrome	158	0.389217	1.4607	0.00323625	0.122499	0.873	4032	tags=29%, list=18%, signal=35%
Hypertrophic cardiomyopathy (HCM)	93	0.418312	1.45739	0.00815217	0.120539	0.877	4119	tags=43%, list=18%, signal=52%
Galactose metabolism	32	0.505046	1.42577	0.0293399	0.15001	0.931	3660	tags=34%, list=16%, signal=41%
ECM-receptor interaction	95	0.405383	1.41128	0.0201149	0.161874	0.954	3225	tags=34%, list=14%, signal=39%
Vibrio cholerae infection	60	0.429896	1.38338	0.0381679	0.192635	0.975	5239	tags=45%, list=23%, signal=59%
Mineral absorption	67	0.424304	1.37846	0.0447368	0.192046	0.978	5231	tags=33%, list=23%, signal=43%
Renin secretion	75	0.404331	1.37518	0.0292683	0.189985	0.981	4509	tags=33%, list=20%, signal=42%
Melanogenesis	101	0.388545	1.36722	0.0176471	0.195025	0.984	2138	tags=24%, list=10%, signal=26%
Lysosome	147	0.36748	1.3557	0.0108401	0.206171	0.991	5504	tags=39%, list=25%, signal=51%
Parathyroid hormone synthesis, secretion and action	107	0.377104	1.34593	0.019943	0.215118	0.992	4036	tags=37%, list=18%, signal=45%
Proteoglycans in cancer	226	0.343307	1.32907	0.00680272	0.23803	0.996	3543	tags=29%, list=16%, signal=34%
Fluid shear stress and atherosclerosis	167	0.351959	1.32869	0.00564972	0.23154	0.996	4392	tags=32%, list=20%, signal=40%

## Sheet: Dex 7d group (down-regulated)
Table S1. The down-regulated gene sets in the Dex 7d group. Gene sets with nominal p<0.05 and FDR < 0.25 are remained and sorted in descending order by │NES│.
Gene Set	SIZE	ES	NES	NOM p-val	FDR q-val	FWER p-val	RANK AT MAX	LEADING EDGE
Primary immunodeficiency	140	-0.793416	-2.71347	0	0	0	3399	tags=69%, list=15%, signal=81%
Asthma	220	-0.746374	-2.67627	0	0	0	3551	tags=40%, list=16%, signal=48%
Intestinal immune network for IgA production	234	-0.733514	-2.66324	0	0	0	4006	tags=42%, list=18%, signal=50%
Autoimmune thyroid disease	263	-0.700393	-2.55259	0	0	0	3551	tags=35%, list=16%, signal=42%
Allograft rejection	252	-0.694441	-2.54157	0	0	0	3551	tags=37%, list=16%, signal=43%
B cell receptor signaling pathway	181	-0.717418	-2.53867	0	0	0	2946	tags=52%, list=13%, signal=60%
Systemic lupus erythematosus	319	-0.673052	-2.48586	0	0	0	2946	tags=43%, list=13%, signal=49%
Fc epsilon RI signaling pathway	171	-0.688749	-2.42634	0	0	0	3399	tags=51%, list=15%, signal=59%
Viral myocarditis	274	-0.655978	-2.40298	0	0	0	3551	tags=36%, list=16%, signal=43%
Hematopoietic cell lineage	196	-0.672567	-2.39052	0	0	0	2946	tags=49%, list=13%, signal=56%
NF-kappa B signaling pathway	291	-0.642965	-2.36273	0	0	0	3839	tags=40%, list=17%, signal=48%
Natural killer cell mediated cytotoxicity	211	-0.653147	-2.35463	0	0	0	3399	tags=45%, list=15%, signal=53%
African trypanosomiasis	138	-0.687105	-2.34736	0	0	0	3866	tags=58%, list=17%, signal=70%
Fc gamma R-mediated phagocytosis	198	-0.650005	-2.31295	0	0	0	3399	tags=50%, list=15%, signal=58%
Staphylococcus aureus infection	294	-0.617348	-2.27807	0	0	0	3399	tags=35%, list=15%, signal=40%
Leishmaniasis	178	-0.643014	-2.27718	0	0	0	3551	tags=52%, list=16%, signal=61%
Epstein-Barr virus infection	428	-0.591685	-2.25767	0	0	0	4134	tags=38%, list=18%, signal=46%
DNA replication	40	-0.755798	-2.12453	0	0	0	2297	tags=63%, list=10%, signal=69%
Transcriptional misregulation in cancers	392	-0.542936	-2.058	0	0	0	3866	tags=37%, list=17%, signal=44%
Tuberculosis	290	-0.543725	-2.01344	0	4.01376e-05	0.001	3888	tags=41%, list=17%, signal=49%
Homologous recombination	43	-0.716876	-2.01285	0	3.82263e-05	0.001	3224	tags=53%, list=14%, signal=62%
Rheumatoid arthritis	293	-0.535488	-1.96772	0	7.66632e-05	0.002	3888	tags=34%, list=17%, signal=40%
Mismatch repair	24	-0.778981	-1.94602	0	0.000185419	0.005	3224	tags=71%, list=14%, signal=83%
Amoebiasis	212	-0.535844	-1.93495	0	0.000214707	0.006	3866	tags=44%, list=17%, signal=53%
Phospholipase D signaling pathway	255	-0.523221	-1.91243	0	0.000275813	0.008	3399	tags=38%, list=15%, signal=44%
Pathogenic Escherichia coli infection	345	-0.50439	-1.89906	0	0.00046504	0.014	4406	tags=40%, list=20%, signal=49%
Base excision repair	69	-0.609915	-1.88329	0	0.0005106	0.016	4553	tags=48%, list=20%, signal=60%
Phagosome	301	-0.509595	-1.87897	0	0.000492364	0.016	3399	tags=36%, list=15%, signal=41%
Calcium signaling pathway	387	-0.490585	-1.84243	0	0.000531532	0.018	3399	tags=29%, list=15%, signal=33%
Cell cycle	125	-0.550152	-1.8379	0	0.000513814	0.018	4988	tags=53%, list=22%, signal=67%
Alcoholism	190	-0.518463	-1.83612	0	0.000523994	0.019	3533	tags=41%, list=16%, signal=48%
T cell receptor signaling pathway	198	-0.512961	-1.83561	0	0.000507619	0.019	3273	tags=19%, list=15%, signal=22%
Th1 and Th2 cell differentiation	178	-0.511694	-1.81659	0	0.000781315	0.03	4746	tags=29%, list=21%, signal=37%
Spliceosome	160	-0.520743	-1.79832	0	0.00113475	0.045	6790	tags=67%, list=30%, signal=95%
Dilated cardiomyopathy (DCM)	198	-0.500758	-1.7837	0	0.00130134	0.053	3886	tags=44%, list=17%, signal=53%
Nucleotide excision repair	50	-0.614936	-1.77911	0	0.00133726	0.056	4745	tags=50%, list=21%, signal=63%
Graft-versus-host disease	148	-0.507736	-1.7616	0	0.0016309	0.068	4743	tags=20%, list=21%, signal=25%
Th17 cell differentiation	198	-0.484647	-1.73904	0	0.00235627	0.098	4746	tags=29%, list=21%, signal=37%
Type I diabetes mellitus	160	-0.490839	-1.70416	0	0.00388013	0.161	4743	tags=19%, list=21%, signal=24%
RNA transport	195	-0.469913	-1.67355	0	0.00606944	0.243	6067	tags=49%, list=27%, signal=67%
Viral carcinogenesis	224	-0.462086	-1.66291	0	0.00686412	0.277	4808	tags=44%, list=21%, signal=55%
Proteasome	50	-0.565387	-1.65495	0.00163399	0.00752229	0.309	6091	tags=60%, list=27%, signal=82%
Antigen processing and presentation	189	-0.461801	-1.63091	0.0015361	0.0103702	0.406	4743	tags=23%, list=21%, signal=29%
HTLV-I infection	335	-0.433149	-1.62113	0	0.0114199	0.447	5267	tags=34%, list=23%, signal=43%
Necroptosis	184	-0.455457	-1.60525	0	0.0137304	0.517	2643	tags=25%, list=12%, signal=28%
RNA polymerase	32	-0.589501	-1.60395	0.0138408	0.0136574	0.526	5807	tags=63%, list=26%, signal=84%
Fanconi anemia pathway	53	-0.548069	-1.60279	0.00332226	0.0135135	0.53	5564	tags=55%, list=25%, signal=73%
Platelet activation	137	-0.457439	-1.56055	0.00151745	0.0205696	0.692	1828	tags=23%, list=8%, signal=24%
Apoptosis - multiple species	37	-0.566144	-1.55126	0.0168067	0.0221529	0.73	4134	tags=41%, list=18%, signal=50%
Leukocyte transendothelial migration	120	-0.453961	-1.51739	0.00481541	0.0315652	0.866	3579	tags=32%, list=16%, signal=37%
Inflammatiory bowel disease (IBD)	153	-0.44176	-1.51171	0.00155763	0.0330375	0.883	4866	tags=24%, list=22%, signal=30%
Parkinson disease	171	-0.428786	-1.50752	0	0.0339878	0.894	7650	tags=54%, list=34%, signal=82%
Measles	255	-0.412211	-1.50156	0	0.0351991	0.903	4134	tags=20%, list=18%, signal=25%
PD-L1 expression and PD-1 checkpoint pathway in cancer	181	-0.420928	-1.48969	0	0.0391278	0.928	5434	tags=28%, list=24%, signal=37%
PI3K-Akt signaling pathway	478	-0.383173	-1.47747	0	0.0433455	0.942	4413	tags=34%, list=20%, signal=42%
mRNA surveillance pathway	96	-0.453942	-1.47446	0.0143541	0.0438468	0.946	6156	tags=52%, list=27%, signal=71%
Human immunodeficiency virus 1 infection	340	-0.394365	-1.47101	0	0.0446098	0.953	5771	tags=31%, list=26%, signal=41%
Ribosome biogenesis in eukaryotes	84	-0.455387	-1.46034	0.0158228	0.0491215	0.97	6824	tags=52%, list=30%, signal=75%
Aminoacyl-tRNA biosynthesis	49	-0.483546	-1.43861	0.037829	0.0597135	0.986	5297	tags=39%, list=24%, signal=51%
Chemokine signaling pathway	184	-0.40633	-1.429	0.00869565	0.0640664	0.992	1905	tags=21%, list=8%, signal=22%
Non-small cell lung cancer	72	-0.460323	-1.42871	0.0203735	0.063117	0.992	4502	tags=39%, list=20%, signal=48%
Platinum drug resistance	89	-0.438982	-1.42203	0.0227273	0.0658163	0.993	4404	tags=34%, list=20%, signal=42%
Toll and Imd signaling pathway	45	-0.494741	-1.41566	0.047138	0.068618	0.995	3277	tags=36%, list=15%, signal=42%
Yersinia infection	218	-0.387176	-1.38905	0.00436047	0.0860259	0.999	3277	tags=18%, list=15%, signal=21%
Shigellosis	266	-0.369839	-1.35021	0.00841515	0.117269	1	4406	tags=31%, list=20%, signal=38%
Tight junction	173	-0.375115	-1.31706	0.0383436	0.150028	1	3693	tags=28%, list=16%, signal=33%
Cell adhesion molecules (CAMs)	260	-0.354661	-1.30273	0.0194986	0.160934	1	3579	tags=21%, list=16%, signal=25%

## Sheet: Dex 14d group (up-regulated)
Table S1. The up-regulated gene sets in the Dex 14d group. Gene sets with nominal p<0.05 and FDR < 0.25 are remained and sorted in descending order by │NES│.
Gene Set	SIZE	ES	NES	NOM p-val	FDR q-val	FWER p-val	RANK AT MAX	LEADING EDGE
Ferroptosis	58	0.561635	1.88403	0	0.0302852	0.02	3219	tags=38%, list=14%, signal=44%
Mineral absorption	67	0.523913	1.79125	0	0.0420626	0.055	3855	tags=43%, list=17%, signal=52%
Prion diseases	33	0.602098	1.73782	0.00806452	0.0441507	0.082	454	tags=21%, list=2%, signal=22%
Porphyrin and chlorophyll metabolism	29	0.593609	1.70899	0.00403226	0.0466951	0.113	4005	tags=59%, list=18%, signal=71%
Collecting duct acid secretion	30	0.54058	1.58638	0.0127119	0.118496	0.305	4484	tags=57%, list=20%, signal=71%
Drug metabolism - cytochrome P450	59	0.48094	1.57896	0.00588235	0.105935	0.327	1410	tags=20%, list=6%, signal=22%
Complement and coagulation cascades	92	0.425549	1.56714	0.00724638	0.09946	0.356	1350	tags=22%, list=6%, signal=23%
Lysosome	147	0.399391	1.549	0	0.100679	0.397	3350	tags=30%, list=15%, signal=35%
TGF-beta signaling pathway	98	0.41672	1.50979	0	0.120042	0.49	2552	tags=27%, list=11%, signal=30%
Chemical carcinogenesis	86	0.39897	1.46235	0.00636943	0.154533	0.614	1075	tags=12%, list=5%, signal=12%
Oxidative phosphorylation	162	0.353797	1.38317	0	0.246257	0.813	5868	tags=47%, list=26%, signal=63%

## Sheet: Dex 14d group (down-regulated)
Table S1. The down-regulated gene sets in the Dex 14d group. Gene sets with nominal p<0.05 and FDR < 0.25 are remained and sorted in descending order by │NES│.
Gene Set	SIZE	ES	NES	NOM p-val	FDR q-val	FWER p-val	RANK AT MAX	LEADING EDGE
Primary immunodeficiency	140	-0.756793	-2.29514	0	0	0	3846	tags=64%, list=17%, signal=77%
Asthma	220	-0.702829	-2.19751	0	0	0	2797	tags=33%, list=12%, signal=37%
Intestinal immune network for IgA production	234	-0.69343	-2.17237	0	0	0	3846	tags=39%, list=17%, signal=46%
B cell receptor signaling pathway	181	-0.699838	-2.16411	0	0	0	3867	tags=55%, list=17%, signal=66%
Autoimmune thyroid disease	263	-0.661748	-2.0924	0	0	0	2797	tags=30%, list=12%, signal=33%
Allograft rejection	252	-0.657965	-2.07021	0	0	0	2797	tags=31%, list=12%, signal=35%
Hematopoietic cell lineage	196	-0.672031	-2.06913	0	0	0	3846	tags=54%, list=17%, signal=65%
Viral myocarditis	274	-0.641406	-2.02735	0	0	0	3846	tags=36%, list=17%, signal=43%
Fc epsilon RI signaling pathway	171	-0.657424	-2.02725	0	0	0	3848	tags=49%, list=17%, signal=59%
Leishmaniasis	178	-0.633432	-1.96064	0	0	0	3846	tags=46%, list=17%, signal=55%
Fc gamma R-mediated phagocytosis	198	-0.621432	-1.93877	0	0	0	3846	tags=48%, list=17%, signal=57%
Natural killer cell mediated cytotoxicity	211	-0.603246	-1.89181	0	7.80669e-05	0.001	4265	tags=48%, list=19%, signal=59%
Th1 and Th2 cell differentiation	178	-0.608038	-1.89162	0	7.20618e-05	0.001	1264	tags=16%, list=6%, signal=17%
NF-kappa B signaling pathway	291	-0.589494	-1.85339	0	0.000262609	0.004	3846	tags=35%, list=17%, signal=42%
Staphylococcus aureus infection	294	-0.584142	-1.84804	0	0.000245102	0.004	3421	tags=29%, list=15%, signal=34%
Epstein-Barr virus infection	428	-0.574484	-1.84722	0	0.000229783	0.004	4477	tags=36%, list=20%, signal=44%
Type I diabetes mellitus	160	-0.592577	-1.81003	0	0.000374977	0.007	2744	tags=19%, list=12%, signal=21%
Platelet activation	137	-0.602893	-1.80946	0	0.000354145	0.007	4195	tags=46%, list=19%, signal=56%
Graft-versus-host disease	148	-0.592651	-1.8064	0	0.000380772	0.008	2744	tags=18%, list=12%, signal=21%
Th17 cell differentiation	198	-0.57874	-1.79993	0	0.000405636	0.009	3639	tags=24%, list=16%, signal=29%
African trypanosomiasis	138	-0.590955	-1.78551	0	0.000597968	0.014	3846	tags=49%, list=17%, signal=58%
Inflammatiory bowel disease (IBD)	153	-0.580425	-1.77078	0	0.000737928	0.018	1114	tags=14%, list=5%, signal=14%
Tuberculosis	290	-0.546448	-1.73569	0	0.00169276	0.043	3630	tags=36%, list=16%, signal=42%
Dilated cardiomyopathy (DCM)	198	-0.550932	-1.70152	0	0.00320729	0.085	3846	tags=42%, list=17%, signal=50%
Antigen processing and presentation	189	-0.546493	-1.70129	0.00105042	0.003079	0.085	2380	tags=17%, list=11%, signal=19%
T cell receptor signaling pathway	198	-0.540774	-1.69095	0	0.00344681	0.096	4470	tags=26%, list=20%, signal=32%
Inflammatory mediator regulation of TRP channels	121	-0.560916	-1.67596	0	0.00459079	0.129	4452	tags=40%, list=20%, signal=49%
Phagosome	301	-0.527974	-1.66518	0	0.00546795	0.154	4347	tags=38%, list=19%, signal=47%
Calcium signaling pathway	387	-0.517785	-1.6573	0	0.00615057	0.173	3852	tags=32%, list=17%, signal=38%
Phospholipase D signaling pathway	255	-0.523729	-1.64562	0	0.00753709	0.216	4167	tags=40%, list=19%, signal=48%
Rheumatoid arthritis	293	-0.519384	-1.63718	0	0.00869384	0.255	3846	tags=30%, list=17%, signal=36%
Amoebiasis	212	-0.522041	-1.63662	0	0.00859145	0.259	4265	tags=41%, list=19%, signal=50%
Systemic lupus erythematosus	319	-0.514385	-1.63261	0	0.00898945	0.279	3846	tags=26%, list=17%, signal=31%
Phosphatidylinositol signaling system	104	-0.547415	-1.5982	0.00114286	0.0150775	0.433	4293	tags=42%, list=19%, signal=52%
Base excision repair	69	-0.567012	-1.59341	0.00237248	0.0157581	0.454	4259	tags=32%, list=19%, signal=39%
Cell adhesion molecules (CAMs)	260	-0.504943	-1.59271	0	0.0154731	0.457	2849	tags=22%, list=13%, signal=24%
Pathogenic Escherichia coli infection	345	-0.496649	-1.58153	0	0.0180561	0.521	4477	tags=38%, list=20%, signal=47%
Leukocyte transendothelial migration	120	-0.520974	-1.5557	0	0.0252196	0.663	4646	tags=40%, list=21%, signal=50%
PD-L1 expression and PD-1 checkpoint pathway in cancer	181	-0.498294	-1.53348	0	0.0326732	0.759	4711	tags=23%, list=21%, signal=29%
Transcriptional misregulation in cancers	392	-0.471848	-1.52038	0	0.0375164	0.819	4339	tags=29%, list=19%, signal=36%
Toxoplasmosis	122	-0.503339	-1.50517	0.00224467	0.0442585	0.868	2836	tags=25%, list=13%, signal=28%
Human immunodeficiency virus 1 infection	340	-0.470252	-1.49488	0	0.0485147	0.902	4470	tags=26%, list=20%, signal=32%
HTLV-I infection	335	-0.466102	-1.48449	0	0.0545807	0.934	5368	tags=30%, list=24%, signal=39%
Phototransduction - fly	31	-0.59819	-1.47747	0.0198151	0.0584339	0.951	3989	tags=45%, list=18%, signal=55%
Axon regeneration	98	-0.503013	-1.47035	0.00910125	0.062861	0.961	4233	tags=39%, list=19%, signal=48%
Chemokine signaling pathway	184	-0.463139	-1.42633	0.0063762	0.102219	0.995	3839	tags=35%, list=17%, signal=42%
Long-term depression	63	-0.513819	-1.42175	0.0302663	0.105594	0.995	6814	tags=49%, list=30%, signal=70%
Apoptosis - fly	54	-0.525629	-1.41677	0.035309	0.109046	0.995	2910	tags=28%, list=13%, signal=32%
Herpes simplex infection	442	-0.435337	-1.40218	0	0.125029	1	5362	tags=38%, list=24%, signal=49%
Spinocerebellar ataxia	104	-0.472205	-1.38461	0.024581	0.14364	1	5740	tags=37%, list=26%, signal=49%
Inositol phosphate metabolism	81	-0.485416	-1.37934	0.0306604	0.148392	1	4301	tags=36%, list=19%, signal=44%
C-type lectin receptor signaling pathway	118	-0.466464	-1.37868	0.0158192	0.14673	1	4437	tags=38%, list=20%, signal=47%
Serotonergic synapse	128	-0.457545	-1.37399	0.0124153	0.151014	1	5524	tags=34%, list=25%, signal=44%
Non-small cell lung cancer	72	-0.476009	-1.34575	0.045067	0.188022	1	4248	tags=35%, list=19%, signal=43%
GnRH signaling pathway	96	-0.460036	-1.34491	0.0490082	0.18624	1	4099	tags=32%, list=18%, signal=39%
MAPK signaling pathway - fly	82	-0.460679	-1.33664	0.0389908	0.197387	1	5803	tags=48%, list=26%, signal=64%
PI3K-Akt signaling pathway	478	-0.409186	-1.32884	0.00201005	0.208822	1	4349	tags=31%, list=19%, signal=38%
Morphine addiction	96	-0.452276	-1.32761	0.0482759	0.208052	1	3852	tags=29%, list=17%, signal=35%
Yersinia infection	218	-0.424063	-1.32731	0.0146138	0.205293	1	4513	tags=25%, list=20%, signal=31%

## Sheet: gene set
Table S1. The list of Gene set
Gene Set
Primary immunodeficiency	ENSRNOG00000000457	ENSRNOG00000000455	ENSRNOG00000003954	ENSRNOG00000056285	ENSRNOG00000055620	ENSRNOG00000049252	ENSRNOG00000034190	ENSRNOG00000051768	ENSRNOG00000048062	ENSRNOG00000049870	ENSRNOG00000050708	ENSRNOG00000009705	ENSRNOG00000053487	ENSRNOG00000018488	ENSRNOG00000042319	ENSRNOG00000047308	ENSRNOG00000046401	ENSRNOG00000021012	ENSRNOG00000060468	ENSRNOG00000047622	ENSRNOG00000000692	ENSRNOG00000053719	ENSRNOG00000037495	ENSRNOG00000020125	ENSRNOG00000042569	ENSRNOG00000001213	ENSRNOG00000052069	ENSRNOG00000042197	ENSRNOG00000049243	ENSRNOG00000045786	ENSRNOG00000047996	ENSRNOG00000061324	ENSRNOG00000018311	ENSRNOG00000055130	ENSRNOG00000058590	ENSRNOG00000060552	ENSRNOG00000047011	ENSRNOG00000052407	ENSRNOG00000060516	ENSRNOG00000028382	ENSRNOG00000048402	ENSRNOG00000010265	ENSRNOG00000056760	ENSRNOG00000046572	ENSRNOG00000030812	ENSRNOG00000050652	ENSRNOG00000047103	ENSRNOG00000007129	ENSRNOG00000006333
Asthma	ENSRNOG00000026669	ENSRNOG00000026762	ENSRNOG00000047854	ENSRNOG00000049491	ENSRNOG00000000454	ENSRNOG00000000837	ENSRNOG00000032708	ENSRNOG00000000451	ENSRNOG00000033215	ENSRNOG00000030431	ENSRNOG00000032844	ENSRNOG00000051002	ENSRNOG00000047864	ENSRNOG00000008111	ENSRNOG00000049342	ENSRNOG00000014312	ENSRNOG00000046089	ENSRNOG00000049830	ENSRNOG00000056285	ENSRNOG00000055620	ENSRNOG00000049252	ENSRNOG00000047797	ENSRNOG00000049773	ENSRNOG00000034190	ENSRNOG00000051768	ENSRNOG00000046292	ENSRNOG00000048062	ENSRNOG00000049870	ENSRNOG00000050708	ENSRNOG00000053487	ENSRNOG00000018488	ENSRNOG00000042319	ENSRNOG00000033801	ENSRNOG00000053457	ENSRNOG00000046646	ENSRNOG00000048670	ENSRNOG00000051843	ENSRNOG00000047308	ENSRNOG00000046401	ENSRNOG00000060468	ENSRNOG00000048203	ENSRNOG00000054269	ENSRNOG00000054267	ENSRNOG00000053359	ENSRNOG00000047622	ENSRNOG00000042119	ENSRNOG00000048115	ENSRNOG00000007652	ENSRNOG00000053719
Intestinal immune network for IgA production	ENSRNOG00000004861	ENSRNOG00000026669	ENSRNOG00000026762	ENSRNOG00000047854	ENSRNOG00000049491	ENSRNOG00000014464	ENSRNOG00000000454	ENSRNOG00000032708	ENSRNOG00000000451	ENSRNOG00000033215	ENSRNOG00000030431	ENSRNOG00000032844	ENSRNOG00000051002	ENSRNOG00000047864	ENSRNOG00000008111	ENSRNOG00000049342	ENSRNOG00000014312	ENSRNOG00000046089	ENSRNOG00000049830	ENSRNOG00000056285	ENSRNOG00000055620	ENSRNOG00000049252	ENSRNOG00000047797	ENSRNOG00000049773	ENSRNOG00000034190	ENSRNOG00000051768	ENSRNOG00000046292	ENSRNOG00000048062	ENSRNOG00000049870	ENSRNOG00000050708	ENSRNOG00000020275	ENSRNOG00000053487	ENSRNOG00000018488	ENSRNOG00000059640	ENSRNOG00000042319	ENSRNOG00000033801	ENSRNOG00000046646	ENSRNOG00000048670	ENSRNOG00000051843	ENSRNOG00000047308	ENSRNOG00000046401	ENSRNOG00000060468	ENSRNOG00000010278	ENSRNOG00000012208	ENSRNOG00000048203	ENSRNOG00000054269	ENSRNOG00000054267	ENSRNOG00000053359	ENSRNOG00000047622
Autoimmune thyroid disease	ENSRNOG00000049590	ENSRNOG00000006104	ENSRNOG00000000763	ENSRNOG00000026669	ENSRNOG00000026762	ENSRNOG00000047854	ENSRNOG00000002978	ENSRNOG00000049491	ENSRNOG00000048951	ENSRNOG00000031090	ENSRNOG00000000454	ENSRNOG00000050998	ENSRNOG00000000723	ENSRNOG00000050183	ENSRNOG00000039744	ENSRNOG00000032708	ENSRNOG00000031607	ENSRNOG00000061639	ENSRNOG00000000451	ENSRNOG00000033215	ENSRNOG00000030431	ENSRNOG00000032844	ENSRNOG00000003972	ENSRNOG00000029001	ENSRNOG00000029386	ENSRNOG00000054129	ENSRNOG00000045924	ENSRNOG00000000795	ENSRNOG00000042905	ENSRNOG00000032596	ENSRNOG00000000787	ENSRNOG00000000777	ENSRNOG00000033136	ENSRNOG00000060412	ENSRNOG00000040052	ENSRNOG00000022107	ENSRNOG00000059770	ENSRNOG00000047706	ENSRNOG00000051002	ENSRNOG00000047864	ENSRNOG00000030712	ENSRNOG00000038999	ENSRNOG00000008111	ENSRNOG00000049342	ENSRNOG00000014312	ENSRNOG00000046089	ENSRNOG00000049830	ENSRNOG00000056285	ENSRNOG00000055620
Allograft rejection	ENSRNOG00000049590	ENSRNOG00000000763	ENSRNOG00000026669	ENSRNOG00000026762	ENSRNOG00000047854	ENSRNOG00000002978	ENSRNOG00000049491	ENSRNOG00000048951	ENSRNOG00000031090	ENSRNOG00000000454	ENSRNOG00000000837	ENSRNOG00000050998	ENSRNOG00000000723	ENSRNOG00000050183	ENSRNOG00000039744	ENSRNOG00000032708	ENSRNOG00000031607	ENSRNOG00000061639	ENSRNOG00000000451	ENSRNOG00000033215	ENSRNOG00000030431	ENSRNOG00000032844	ENSRNOG00000029001	ENSRNOG00000029386	ENSRNOG00000045924	ENSRNOG00000000795	ENSRNOG00000042905	ENSRNOG00000032596	ENSRNOG00000000787	ENSRNOG00000000777	ENSRNOG00000033136	ENSRNOG00000060412	ENSRNOG00000040052	ENSRNOG00000022107	ENSRNOG00000059770	ENSRNOG00000047706	ENSRNOG00000051002	ENSRNOG00000047864	ENSRNOG00000030712	ENSRNOG00000038999	ENSRNOG00000008111	ENSRNOG00000049342	ENSRNOG00000014312	ENSRNOG00000046089	ENSRNOG00000049830	ENSRNOG00000056285	ENSRNOG00000055620	ENSRNOG00000049252	ENSRNOG00000047797
B cell receptor signaling pathway	ENSRNOG00000019730	ENSRNOG00000043210	ENSRNOG00000001068	ENSRNOG00000056285	ENSRNOG00000055620	ENSRNOG00000049252	ENSRNOG00000034190	ENSRNOG00000051768	ENSRNOG00000048062	ENSRNOG00000027808	ENSRNOG00000030888	ENSRNOG00000049870	ENSRNOG00000012160	ENSRNOG00000050708	ENSRNOG00000053487	ENSRNOG00000042319	ENSRNOG00000021497	ENSRNOG00000020063	ENSRNOG00000017020	ENSRNOG00000048172	ENSRNOG00000009338	ENSRNOG00000047308	ENSRNOG00000046401	ENSRNOG00000016846	ENSRNOG00000017485	ENSRNOG00000012175	ENSRNOG00000011917	ENSRNOG00000060468	ENSRNOG00000058422	ENSRNOG00000047622	ENSRNOG00000053719	ENSRNOG00000007350	ENSRNOG00000037495	ENSRNOG00000058538	ENSRNOG00000023079	ENSRNOG00000020125	ENSRNOG00000042569	ENSRNOG00000018677	ENSRNOG00000052069	ENSRNOG00000042197	ENSRNOG00000049243	ENSRNOG00000045786	ENSRNOG00000047996	ENSRNOG00000061324	ENSRNOG00000018311	ENSRNOG00000055130	ENSRNOG00000008180	ENSRNOG00000007422	ENSRNOG00000000145
Systemic lupus erythematosus	ENSRNOG00000018517	ENSRNOG00000051235	ENSRNOG00000050410	ENSRNOG00000026669	ENSRNOG00000026762	ENSRNOG00000047854	ENSRNOG00000049491	ENSRNOG00000047657	ENSRNOG00000018899	ENSRNOG00000000454	ENSRNOG00000000837	ENSRNOG00000032708	ENSRNOG00000000451	ENSRNOG00000033215	ENSRNOG00000030431	ENSRNOG00000032844	ENSRNOG00000030729	ENSRNOG00000000443	ENSRNOG00000033685	ENSRNOG00000051002	ENSRNOG00000047864	ENSRNOG00000007697	ENSRNOG00000049342	ENSRNOG00000014312	ENSRNOG00000046089	ENSRNOG00000049830	ENSRNOG00000056285	ENSRNOG00000055620	ENSRNOG00000049252	ENSRNOG00000047797	ENSRNOG00000049773	ENSRNOG00000034190	ENSRNOG00000051768	ENSRNOG00000046292	ENSRNOG00000048062	ENSRNOG00000059382	ENSRNOG00000046144	ENSRNOG00000061379	ENSRNOG00000049870	ENSRNOG00000048735	ENSRNOG00000050708	ENSRNOG00000053487	ENSRNOG00000046663	ENSRNOG00000058444	ENSRNOG00000018488	ENSRNOG00000042319	ENSRNOG00000033045	ENSRNOG00000050933	ENSRNOG00000048642
Fc epsilon RI signaling pathway	ENSRNOG00000002079	ENSRNOG00000000513	ENSRNOG00000000515	ENSRNOG00000000596	ENSRNOG00000000837	ENSRNOG00000001068	ENSRNOG00000008111	ENSRNOG00000056285	ENSRNOG00000055620	ENSRNOG00000049252	ENSRNOG00000034190	ENSRNOG00000051768	ENSRNOG00000048062	ENSRNOG00000049870	ENSRNOG00000012160	ENSRNOG00000050708	ENSRNOG00000053487	ENSRNOG00000042319	ENSRNOG00000021497	ENSRNOG00000017020	ENSRNOG00000048172	ENSRNOG00000009338	ENSRNOG00000047308	ENSRNOG00000046401	ENSRNOG00000016846	ENSRNOG00000026805	ENSRNOG00000000907	ENSRNOG00000060468	ENSRNOG00000003834	ENSRNOG00000047622	ENSRNOG00000007652	ENSRNOG00000006984	ENSRNOG00000004437	ENSRNOG00000053719	ENSRNOG00000020993	ENSRNOG00000007350	ENSRNOG00000037495	ENSRNOG00000023079	ENSRNOG00000026786	ENSRNOG00000042569	ENSRNOG00000018677	ENSRNOG00000052069	ENSRNOG00000042197	ENSRNOG00000049243	ENSRNOG00000045786	ENSRNOG00000047996	ENSRNOG00000011882	ENSRNOG00000061324	ENSRNOG00000055130
Viral myocarditis	ENSRNOG00000047356	ENSRNOG00000049590	ENSRNOG00000000763	ENSRNOG00000000596	ENSRNOG00000026669	ENSRNOG00000026762	ENSRNOG00000047854	ENSRNOG00000049491	ENSRNOG00000048951	ENSRNOG00000031090	ENSRNOG00000000454	ENSRNOG00000050998	ENSRNOG00000000723	ENSRNOG00000050183	ENSRNOG00000039744	ENSRNOG00000032708	ENSRNOG00000031607	ENSRNOG00000061639	ENSRNOG00000001068	ENSRNOG00000000451	ENSRNOG00000033215	ENSRNOG00000030431	ENSRNOG00000032844	ENSRNOG00000046366	ENSRNOG00000029001	ENSRNOG00000029386	ENSRNOG00000045924	ENSRNOG00000000795	ENSRNOG00000042905	ENSRNOG00000032596	ENSRNOG00000000787	ENSRNOG00000000777	ENSRNOG00000033136	ENSRNOG00000060412	ENSRNOG00000040052	ENSRNOG00000022107	ENSRNOG00000059770	ENSRNOG00000047706	ENSRNOG00000051002	ENSRNOG00000047864	ENSRNOG00000030712	ENSRNOG00000038999	ENSRNOG00000049342	ENSRNOG00000014312	ENSRNOG00000046089	ENSRNOG00000049830	ENSRNOG00000056285	ENSRNOG00000055620	ENSRNOG00000049252
Hematopoietic cell lineage	ENSRNOG00000004861	ENSRNOG00000020618	ENSRNOG00000056212	ENSRNOG00000026669	ENSRNOG00000026762	ENSRNOG00000047854	ENSRNOG00000049491	ENSRNOG00000002227	ENSRNOG00000000454	ENSRNOG00000000837	ENSRNOG00000032708	ENSRNOG00000000451	ENSRNOG00000033215	ENSRNOG00000005906	ENSRNOG00000043176	ENSRNOG00000040108	ENSRNOG00000030431	ENSRNOG00000032844	ENSRNOG00000051002	ENSRNOG00000047864	ENSRNOG00000008111	ENSRNOG00000056285	ENSRNOG00000055620	ENSRNOG00000049252	ENSRNOG00000034190	ENSRNOG00000051768	ENSRNOG00000038540	ENSRNOG00000048062	ENSRNOG00000017386	ENSRNOG00000046981	ENSRNOG00000049870	ENSRNOG00000050708	ENSRNOG00000003069	ENSRNOG00000053487	ENSRNOG00000049782	ENSRNOG00000042319	ENSRNOG00000046850	ENSRNOG00000047308	ENSRNOG00000046401	ENSRNOG00000026805	ENSRNOG00000060468	ENSRNOG00000010278	ENSRNOG00000021499	ENSRNOG00000047622	ENSRNOG00000004575	ENSRNOG00000053719	ENSRNOG00000015945	ENSRNOG00000037495	ENSRNOG00000026786
NF-kappa B signaling pathway	ENSRNOG00000017285	ENSRNOG00000032208	ENSRNOG00000014464	ENSRNOG00000048914	ENSRNOG00000002791	ENSRNOG00000000837	ENSRNOG00000000836	ENSRNOG00000000838	ENSRNOG00000011406	ENSRNOG00000000847	ENSRNOG00000013018	ENSRNOG00000002525	ENSRNOG00000049342	ENSRNOG00000014312	ENSRNOG00000046089	ENSRNOG00000049830	ENSRNOG00000056285	ENSRNOG00000055620	ENSRNOG00000049252	ENSRNOG00000047797	ENSRNOG00000049773	ENSRNOG00000034190	ENSRNOG00000051768	ENSRNOG00000046292	ENSRNOG00000048062	ENSRNOG00000030888	ENSRNOG00000049870	ENSRNOG00000012160	ENSRNOG00000003084	ENSRNOG00000050708	ENSRNOG00000009705	ENSRNOG00000053487	ENSRNOG00000018488	ENSRNOG00000042319	ENSRNOG00000033801	ENSRNOG00000046646	ENSRNOG00000048670	ENSRNOG00000051843	ENSRNOG00000047308	ENSRNOG00000046401	ENSRNOG00000060468	ENSRNOG00000047730	ENSRNOG00000048203	ENSRNOG00000054269	ENSRNOG00000054267	ENSRNOG00000053359	ENSRNOG00000047622	ENSRNOG00000042119	ENSRNOG00000048115
Natural killer cell mediated cytotoxicity	ENSRNOG00000043210	ENSRNOG00000000596	ENSRNOG00000002978	ENSRNOG00000000837	ENSRNOG00000001068	ENSRNOG00000038483	ENSRNOG00000000854	ENSRNOG00000056285	ENSRNOG00000055620	ENSRNOG00000049252	ENSRNOG00000034190	ENSRNOG00000051768	ENSRNOG00000048062	ENSRNOG00000013747	ENSRNOG00000049870	ENSRNOG00000012160	ENSRNOG00000050708	ENSRNOG00000009705	ENSRNOG00000053487	ENSRNOG00000040300	ENSRNOG00000052145	ENSRNOG00000042319	ENSRNOG00000006268	ENSRNOG00000020845	ENSRNOG00000048172	ENSRNOG00000009338	ENSRNOG00000047308	ENSRNOG00000046401	ENSRNOG00000016846	ENSRNOG00000026805	ENSRNOG00000012439	ENSRNOG00000012175	ENSRNOG00000060468	ENSRNOG00000031618	ENSRNOG00000047622	ENSRNOG00000004737	ENSRNOG00000053719	ENSRNOG00000007350	ENSRNOG00000037495	ENSRNOG00000023079	ENSRNOG00000042569	ENSRNOG00000042852	ENSRNOG00000019142	ENSRNOG00000052069	ENSRNOG00000042197	ENSRNOG00000049243	ENSRNOG00000045786	ENSRNOG00000047996	ENSRNOG00000061324
African trypanosomiasis	ENSRNOG00000002978	ENSRNOG00000000837	ENSRNOG00000002723	ENSRNOG00000056285	ENSRNOG00000055620	ENSRNOG00000049252	ENSRNOG00000034190	ENSRNOG00000051768	ENSRNOG00000048062	ENSRNOG00000049870	ENSRNOG00000050708	ENSRNOG00000053487	ENSRNOG00000042319	ENSRNOG00000048161	ENSRNOG00000047308	ENSRNOG00000046401	ENSRNOG00000060468	ENSRNOG00000010278	ENSRNOG00000047622	ENSRNOG00000053719	ENSRNOG00000004810	ENSRNOG00000037495	ENSRNOG00000009848	ENSRNOG00000042569	ENSRNOG00000019142	ENSRNOG00000052069	ENSRNOG00000042197	ENSRNOG00000049243	ENSRNOG00000045786	ENSRNOG00000047996	ENSRNOG00000061324	ENSRNOG00000021150	ENSRNOG00000007468	ENSRNOG00000055130	ENSRNOG00000058337	ENSRNOG00000060552	ENSRNOG00000047011	ENSRNOG00000004647	ENSRNOG00000060516	ENSRNOG00000048402	ENSRNOG00000058105	ENSRNOG00000013634	ENSRNOG00000056760	ENSRNOG00000046572	ENSRNOG00000030812	ENSRNOG00000050652	ENSRNOG00000047103	ENSRNOG00000006333	ENSRNOG00000029121
Fc gamma R-mediated phagocytosis	ENSRNOG00000019730	ENSRNOG00000001480	ENSRNOG00000014289	ENSRNOG00000028062	ENSRNOG00000048898	ENSRNOG00000001068	ENSRNOG00000000991	ENSRNOG00000000996	ENSRNOG00000015232	ENSRNOG00000059510	ENSRNOG00000056285	ENSRNOG00000055620	ENSRNOG00000049252	ENSRNOG00000034190	ENSRNOG00000016346	ENSRNOG00000051768	ENSRNOG00000048062	ENSRNOG00000049870	ENSRNOG00000012160	ENSRNOG00000050708	ENSRNOG00000020660	ENSRNOG00000053487	ENSRNOG00000046663	ENSRNOG00000042319	ENSRNOG00000021497	ENSRNOG00000017020	ENSRNOG00000003919	ENSRNOG00000047308	ENSRNOG00000046401	ENSRNOG00000016846	ENSRNOG00000010161	ENSRNOG00000060468	ENSRNOG00000012490	ENSRNOG00000047622	ENSRNOG00000001470	ENSRNOG00000053719	ENSRNOG00000015603	ENSRNOG00000007350	ENSRNOG00000037495	ENSRNOG00000042569	ENSRNOG00000018677	ENSRNOG00000020577	ENSRNOG00000008116	ENSRNOG00000018991	ENSRNOG00000052069	ENSRNOG00000025792	ENSRNOG00000042197	ENSRNOG00000013536	ENSRNOG00000049243
Staphylococcus aureus infection	ENSRNOG00000000419	ENSRNOG00000051158	ENSRNOG00000051235	ENSRNOG00000010970	ENSRNOG00000011196	ENSRNOG00000026669	ENSRNOG00000033617	ENSRNOG00000026762	ENSRNOG00000011628	ENSRNOG00000047854	ENSRNOG00000011846	ENSRNOG00000030170	ENSRNOG00000049491	ENSRNOG00000011986	ENSRNOG00000027139	ENSRNOG00000011907	ENSRNOG00000031422	ENSRNOG00000013896	ENSRNOG00000047657	ENSRNOG00000018899	ENSRNOG00000000454	ENSRNOG00000032708	ENSRNOG00000051302	ENSRNOG00000030344	ENSRNOG00000013611	ENSRNOG00000000451	ENSRNOG00000013754	ENSRNOG00000031805	ENSRNOG00000014070	ENSRNOG00000014099	ENSRNOG00000033215	ENSRNOG00000014441	ENSRNOG00000026371	ENSRNOG00000003899	ENSRNOG00000014233	ENSRNOG00000061636	ENSRNOG00000014370	ENSRNOG00000002794	ENSRNOG00000030431	ENSRNOG00000032844	ENSRNOG00000034087	ENSRNOG00000047393	ENSRNOG00000030729	ENSRNOG00000000443	ENSRNOG00000033564	ENSRNOG00000051002	ENSRNOG00000047864	ENSRNOG00000049342	ENSRNOG00000014312
Leishmaniasis	ENSRNOG00000017285	ENSRNOG00000004861	ENSRNOG00000000513	ENSRNOG00000000515	ENSRNOG00000001480	ENSRNOG00000026669	ENSRNOG00000026762	ENSRNOG00000047854	ENSRNOG00000049491	ENSRNOG00000000454	ENSRNOG00000000837	ENSRNOG00000032708	ENSRNOG00000000451	ENSRNOG00000033215	ENSRNOG00000030431	ENSRNOG00000032844	ENSRNOG00000051002	ENSRNOG00000047864	ENSRNOG00000013014	ENSRNOG00000002525	ENSRNOG00000056285	ENSRNOG00000055620	ENSRNOG00000049252	ENSRNOG00000034190	ENSRNOG00000051768	ENSRNOG00000048062	ENSRNOG00000030888	ENSRNOG00000049870	ENSRNOG00000050708	ENSRNOG00000053487	ENSRNOG00000046663	ENSRNOG00000042319	ENSRNOG00000020063	ENSRNOG00000047308	ENSRNOG00000046401	ENSRNOG00000060468	ENSRNOG00000047622	ENSRNOG00000006984	ENSRNOG00000004575	ENSRNOG00000053719	ENSRNOG00000059968	ENSRNOG00000037495	ENSRNOG00000016054	ENSRNOG00000042569	ENSRNOG00000052069	ENSRNOG00000042197	ENSRNOG00000049243	ENSRNOG00000045786	ENSRNOG00000047996
Epstein-Barr virus infection	ENSRNOG00000017285	ENSRNOG00000000485	ENSRNOG00000049590	ENSRNOG00000002079	ENSRNOG00000000513	ENSRNOG00000000515	ENSRNOG00000000763	ENSRNOG00000026669	ENSRNOG00000026762	ENSRNOG00000047854	ENSRNOG00000049491	ENSRNOG00000029273	ENSRNOG00000000457	ENSRNOG00000002791	ENSRNOG00000048951	ENSRNOG00000000455	ENSRNOG00000031090	ENSRNOG00000000454	ENSRNOG00000000837	ENSRNOG00000050998	ENSRNOG00000000723	ENSRNOG00000050183	ENSRNOG00000039744	ENSRNOG00000032708	ENSRNOG00000031607	ENSRNOG00000061639	ENSRNOG00000001068	ENSRNOG00000000451	ENSRNOG00000033215	ENSRNOG00000014097	ENSRNOG00000030431	ENSRNOG00000032844	ENSRNOG00000029001	ENSRNOG00000029386	ENSRNOG00000045924	ENSRNOG00000000795	ENSRNOG00000042905	ENSRNOG00000032596	ENSRNOG00000000787	ENSRNOG00000000777	ENSRNOG00000004500	ENSRNOG00000033136	ENSRNOG00000060412	ENSRNOG00000047035	ENSRNOG00000040052	ENSRNOG00000022107	ENSRNOG00000059770	ENSRNOG00000047706	ENSRNOG00000051002
DNA replication	ENSRNOG00000013322	ENSRNOG00000003123	ENSRNOG00000001134	ENSRNOG00000003504	ENSRNOG00000016316	ENSRNOG00000009192	ENSRNOG00000008309	ENSRNOG00000001349	ENSRNOG00000012486	ENSRNOG00000001457	ENSRNOG00000008584	ENSRNOG00000000387	ENSRNOG00000001833	ENSRNOG00000001088	ENSRNOG00000020906	ENSRNOG00000037449	ENSRNOG00000019681	ENSRNOG00000003703	ENSRNOG00000006102	ENSRNOG00000004242	ENSRNOG00000001816	ENSRNOG00000012100	ENSRNOG00000047910	ENSRNOG00000014193	ENSRNOG00000014336	ENSRNOG00000021264	ENSRNOG00000031993	ENSRNOG00000014098	ENSRNOG00000004843	ENSRNOG00000012543	ENSRNOG00000002855	ENSRNOG00000020700	ENSRNOG00000018765	ENSRNOG00000020531	ENSRNOG00000013005	ENSRNOG00000018411	ENSRNOG00000047206	ENSRNOG00000055277	ENSRNOG00000037481	ENSRNOG00000047487
Transcriptional misregulation in cancers	ENSRNOG00000000485	ENSRNOG00000000464	ENSRNOG00000013953	ENSRNOG00000050252	ENSRNOG00000057650	ENSRNOG00000048914	ENSRNOG00000010436	ENSRNOG00000058393	ENSRNOG00000052721	ENSRNOG00000033134	ENSRNOG00000004500	ENSRNOG00000033685	ENSRNOG00000032254	ENSRNOG00000049342	ENSRNOG00000014312	ENSRNOG00000046089	ENSRNOG00000049830	ENSRNOG00000056285	ENSRNOG00000055620	ENSRNOG00000049252	ENSRNOG00000047797	ENSRNOG00000049773	ENSRNOG00000034190	ENSRNOG00000051768	ENSRNOG00000046292	ENSRNOG00000048062	ENSRNOG00000030888	ENSRNOG00000046144	ENSRNOG00000049870	ENSRNOG00000008658	ENSRNOG00000050708	ENSRNOG00000015380	ENSRNOG00000053487	ENSRNOG00000050922	ENSRNOG00000018488	ENSRNOG00000011280	ENSRNOG00000042319	ENSRNOG00000004606	ENSRNOG00000001312	ENSRNOG00000015133	ENSRNOG00000060366	ENSRNOG00000033801	ENSRNOG00000028975	ENSRNOG00000046646	ENSRNOG00000048670	ENSRNOG00000003229	ENSRNOG00000051843	ENSRNOG00000047308	ENSRNOG00000061910
Tuberculosis	ENSRNOG00000002079	ENSRNOG00000000513	ENSRNOG00000000515	ENSRNOG00000019629	ENSRNOG00000043210	ENSRNOG00000026669	ENSRNOG00000026762	ENSRNOG00000047854	ENSRNOG00000049491	ENSRNOG00000002791	ENSRNOG00000002161	ENSRNOG00000000454	ENSRNOG00000000837	ENSRNOG00000032708	ENSRNOG00000017235	ENSRNOG00000000451	ENSRNOG00000033215	ENSRNOG00000030431	ENSRNOG00000032844	ENSRNOG00000047035	ENSRNOG00000051002	ENSRNOG00000047864	ENSRNOG00000004060	ENSRNOG00000020300	ENSRNOG00000060708	ENSRNOG00000056285	ENSRNOG00000055620	ENSRNOG00000049252	ENSRNOG00000030862	ENSRNOG00000034190	ENSRNOG00000051768	ENSRNOG00000048062	ENSRNOG00000030888	ENSRNOG00000009783	ENSRNOG00000010309	ENSRNOG00000049870	ENSRNOG00000012160	ENSRNOG00000050708	ENSRNOG00000012944	ENSRNOG00000053487	ENSRNOG00000046663	ENSRNOG00000052145	ENSRNOG00000042319	ENSRNOG00000021497	ENSRNOG00000006268	ENSRNOG00000048161	ENSRNOG00000016770	ENSRNOG00000047308	ENSRNOG00000013428
Homologous recombination	ENSRNOG00000021780	ENSRNOG00000001111	ENSRNOG00000003123	ENSRNOG00000009742	ENSRNOG00000039949	ENSRNOG00000008309	ENSRNOG00000010420	ENSRNOG00000005099	ENSRNOG00000009506	ENSRNOG00000025126	ENSRNOG00000004364	ENSRNOG00000019681	ENSRNOG00000037302	ENSRNOG00000012100	ENSRNOG00000055822	ENSRNOG00000012141	ENSRNOG00000020701	ENSRNOG00000002165	ENSRNOG00000011213	ENSRNOG00000014960	ENSRNOG00000033065	ENSRNOG00000006661	ENSRNOG00000059245	ENSRNOG00000007493	ENSRNOG00000014098	ENSRNOG00000059997	ENSRNOG00000026440	ENSRNOG00000001845	ENSRNOG00000012899	ENSRNOG00000017071	ENSRNOG00000020617	ENSRNOG00000029773	ENSRNOG00000024420	ENSRNOG00000009789	ENSRNOG00000018765	ENSRNOG00000013148	ENSRNOG00000013005	ENSRNOG00000018411	ENSRNOG00000005270	ENSRNOG00000008580	ENSRNOG00000016891	ENSRNOG00000037481	ENSRNOG00000048061
Rheumatoid arthritis	ENSRNOG00000026669	ENSRNOG00000026762	ENSRNOG00000047854	ENSRNOG00000049491	ENSRNOG00000014464	ENSRNOG00000000454	ENSRNOG00000000837	ENSRNOG00000000836	ENSRNOG00000000840	ENSRNOG00000032708	ENSRNOG00000010906	ENSRNOG00000017235	ENSRNOG00000000451	ENSRNOG00000033215	ENSRNOG00000011205	ENSRNOG00000030431	ENSRNOG00000001992	ENSRNOG00000032844	ENSRNOG00000054129	ENSRNOG00000051002	ENSRNOG00000047864	ENSRNOG00000049342	ENSRNOG00000014312	ENSRNOG00000046089	ENSRNOG00000049830	ENSRNOG00000056285	ENSRNOG00000055620	ENSRNOG00000049252	ENSRNOG00000047797	ENSRNOG00000049773	ENSRNOG00000030862	ENSRNOG00000034190	ENSRNOG00000051768	ENSRNOG00000046292	ENSRNOG00000048062	ENSRNOG00000017386	ENSRNOG00000049870	ENSRNOG00000050708	ENSRNOG00000053487	ENSRNOG00000051860	ENSRNOG00000042319	ENSRNOG00000046261	ENSRNOG00000033801	ENSRNOG00000046646	ENSRNOG00000048670	ENSRNOG00000051843	ENSRNOG00000047308	ENSRNOG00000013428	ENSRNOG00000046401
Mismatch repair	ENSRNOG00000015796	ENSRNOG00000016134	ENSRNOG00000001040	ENSRNOG00000003123	ENSRNOG00000001134	ENSRNOG00000008309	ENSRNOG00000001457	ENSRNOG00000001088	ENSRNOG00000019681	ENSRNOG00000001816	ENSRNOG00000012100	ENSRNOG00000014193	ENSRNOG00000056209	ENSRNOG00000021264	ENSRNOG00000006699	ENSRNOG00000014098	ENSRNOG00000002855	ENSRNOG00000013673	ENSRNOG00000018765	ENSRNOG00000013005	ENSRNOG00000018411	ENSRNOG00000047206	ENSRNOG00000033809	ENSRNOG00000037481
Amoebiasis	ENSRNOG00000011300	ENSRNOG00000000837	ENSRNOG00000002667	ENSRNOG00000002680	ENSRNOG00000014851	ENSRNOG00000007697	ENSRNOG00000060708	ENSRNOG00000017695	ENSRNOG00000056285	ENSRNOG00000055620	ENSRNOG00000049252	ENSRNOG00000034190	ENSRNOG00000051768	ENSRNOG00000048062	ENSRNOG00000030888	ENSRNOG00000014840	ENSRNOG00000049870	ENSRNOG00000050708	ENSRNOG00000053487	ENSRNOG00000042319	ENSRNOG00000046602	ENSRNOG00000047308	ENSRNOG00000046401	ENSRNOG00000016846	ENSRNOG00000026805	ENSRNOG00000060468	ENSRNOG00000010278	ENSRNOG00000022139	ENSRNOG00000047622	ENSRNOG00000002578	ENSRNOG00000020647	ENSRNOG00000053719	ENSRNOG00000004810	ENSRNOG00000018951	ENSRNOG00000037495	ENSRNOG00000016420	ENSRNOG00000042569	ENSRNOG00000054945	ENSRNOG00000052069	ENSRNOG00000013736	ENSRNOG00000017194	ENSRNOG00000042197	ENSRNOG00000049243	ENSRNOG00000045786	ENSRNOG00000047996	ENSRNOG00000061324	ENSRNOG00000017962	ENSRNOG00000021150	ENSRNOG00000007468
Phospholipase D signaling pathway	ENSRNOG00000021468	ENSRNOG00000014269	ENSRNOG00000048239	ENSRNOG00000002338	ENSRNOG00000029986	ENSRNOG00000051964	ENSRNOG00000000596	ENSRNOG00000029148	ENSRNOG00000049768	ENSRNOG00000002227	ENSRNOG00000001065	ENSRNOG00000026490	ENSRNOG00000001235	ENSRNOG00000039323	ENSRNOG00000000437	ENSRNOG00000015232	ENSRNOG00000011470	ENSRNOG00000017731	ENSRNOG00000056285	ENSRNOG00000055620	ENSRNOG00000049252	ENSRNOG00000034190	ENSRNOG00000051768	ENSRNOG00000048062	ENSRNOG00000049870	ENSRNOG00000012160	ENSRNOG00000050708	ENSRNOG00000053487	ENSRNOG00000043381	ENSRNOG00000018461	ENSRNOG00000001205	ENSRNOG00000010695	ENSRNOG00000004890	ENSRNOG00000042319	ENSRNOG00000010758	ENSRNOG00000021497	ENSRNOG00000001312	ENSRNOG00000015577	ENSRNOG00000009338	ENSRNOG00000047308	ENSRNOG00000046401	ENSRNOG00000016846	ENSRNOG00000060468	ENSRNOG00000047622	ENSRNOG00000053719	ENSRNOG00000004810	ENSRNOG00000020993	ENSRNOG00000037495	ENSRNOG00000023079
Pathogenic Escherichia coli infection	ENSRNOG00000017285	ENSRNOG00000054495	ENSRNOG00000010085	ENSRNOG00000018273	ENSRNOG00000000485	ENSRNOG00000001007	ENSRNOG00000047356	ENSRNOG00000002079	ENSRNOG00000000513	ENSRNOG00000000515	ENSRNOG00000014289	ENSRNOG00000023373	ENSRNOG00000000596	ENSRNOG00000010609	ENSRNOG00000028062	ENSRNOG00000002978	ENSRNOG00000048898	ENSRNOG00000061216	ENSRNOG00000001065	ENSRNOG00000000837	ENSRNOG00000001068	ENSRNOG00000038483	ENSRNOG00000001235	ENSRNOG00000020027	ENSRNOG00000000991	ENSRNOG00000047280	ENSRNOG00000000996	ENSRNOG00000047035	ENSRNOG00000017209	ENSRNOG00000014872	ENSRNOG00000056285	ENSRNOG00000055620	ENSRNOG00000049252	ENSRNOG00000007372	ENSRNOG00000003170	ENSRNOG00000034190	ENSRNOG00000002886	ENSRNOG00000051768	ENSRNOG00000023960	ENSRNOG00000048062	ENSRNOG00000014917	ENSRNOG00000030888	ENSRNOG00000049870	ENSRNOG00000050708	ENSRNOG00000006557	ENSRNOG00000012944	ENSRNOG00000053487	ENSRNOG00000043381	ENSRNOG00000046663
Base excision repair	ENSRNOG00000021815	ENSRNOG00000051196	ENSRNOG00000027124	ENSRNOG00000054519	ENSRNOG00000011688	ENSRNOG00000003084	ENSRNOG00000036842	ENSRNOG00000020571	ENSRNOG00000019150	ENSRNOG00000038437	ENSRNOG00000000692	ENSRNOG00000049504	ENSRNOG00000059133	ENSRNOG00000005861	ENSRNOG00000047294	ENSRNOG00000056033	ENSRNOG00000055015	ENSRNOG00000037449	ENSRNOG00000019681	ENSRNOG00000006102	ENSRNOG00000004242	ENSRNOG00000058908	ENSRNOG00000011429	ENSRNOG00000034030	ENSRNOG00000047910	ENSRNOG00000032420	ENSRNOG00000038033	ENSRNOG00000014193	ENSRNOG00000058209	ENSRNOG00000021264	ENSRNOG00000058716	ENSRNOG00000019915	ENSRNOG00000059691	ENSRNOG00000018577	ENSRNOG00000049746	ENSRNOG00000014098	ENSRNOG00000038478	ENSRNOG00000004843	ENSRNOG00000052140	ENSRNOG00000010919	ENSRNOG00000048094	ENSRNOG00000038721	ENSRNOG00000009663	ENSRNOG00000060742	ENSRNOG00000018765	ENSRNOG00000020531	ENSRNOG00000048471	ENSRNOG00000058277	ENSRNOG00000018411
Phagosome	ENSRNOG00000049590	ENSRNOG00000001480	ENSRNOG00000019629	ENSRNOG00000048472	ENSRNOG00000000763	ENSRNOG00000025791	ENSRNOG00000026669	ENSRNOG00000026762	ENSRNOG00000047854	ENSRNOG00000049491	ENSRNOG00000000457	ENSRNOG00000061216	ENSRNOG00000048951	ENSRNOG00000000455	ENSRNOG00000002161	ENSRNOG00000031090	ENSRNOG00000000454	ENSRNOG00000050998	ENSRNOG00000000723	ENSRNOG00000000840	ENSRNOG00000050183	ENSRNOG00000039744	ENSRNOG00000032708	ENSRNOG00000031607	ENSRNOG00000061639	ENSRNOG00000017235	ENSRNOG00000001068	ENSRNOG00000000451	ENSRNOG00000033215	ENSRNOG00000005906	ENSRNOG00000043176	ENSRNOG00000040108	ENSRNOG00000023278	ENSRNOG00000030431	ENSRNOG00000001992	ENSRNOG00000032844	ENSRNOG00000029001	ENSRNOG00000029386	ENSRNOG00000030055	ENSRNOG00000045924	ENSRNOG00000000795	ENSRNOG00000042905	ENSRNOG00000032596	ENSRNOG00000000787	ENSRNOG00000000777	ENSRNOG00000033136	ENSRNOG00000060412	ENSRNOG00000040052	ENSRNOG00000022107
Calcium signaling pathway	ENSRNOG00000039980	ENSRNOG00000052795	ENSRNOG00000020425	ENSRNOG00000043210	ENSRNOG00000012609	ENSRNOG00000000920	ENSRNOG00000049768	ENSRNOG00000038398	ENSRNOG00000012674	ENSRNOG00000019208	ENSRNOG00000003063	ENSRNOG00000007445	ENSRNOG00000018827	ENSRNOG00000037845	ENSRNOG00000004060	ENSRNOG00000049342	ENSRNOG00000014312	ENSRNOG00000046089	ENSRNOG00000049830	ENSRNOG00000056285	ENSRNOG00000055620	ENSRNOG00000049252	ENSRNOG00000047797	ENSRNOG00000049773	ENSRNOG00000001296	ENSRNOG00000034190	ENSRNOG00000051768	ENSRNOG00000046292	ENSRNOG00000010830	ENSRNOG00000048062	ENSRNOG00000009783	ENSRNOG00000014840	ENSRNOG00000049870	ENSRNOG00000050708	ENSRNOG00000003069	ENSRNOG00000053487	ENSRNOG00000018461	ENSRNOG00000002215	ENSRNOG00000000413	ENSRNOG00000004890	ENSRNOG00000042319	ENSRNOG00000021789	ENSRNOG00000018943	ENSRNOG00000033801	ENSRNOG00000046646	ENSRNOG00000048670	ENSRNOG00000004094	ENSRNOG00000016770	ENSRNOG00000006470
Cell cycle	ENSRNOG00000017536	ENSRNOG00000047356	ENSRNOG00000005310	ENSRNOG00000029273	ENSRNOG00000010436	ENSRNOG00000009134	ENSRNOG00000004500	ENSRNOG00000050482	ENSRNOG00000028415	ENSRNOG00000024008	ENSRNOG00000012558	ENSRNOG00000005904	ENSRNOG00000021248	ENSRNOG00000025028	ENSRNOG00000016316	ENSRNOG00000005376	ENSRNOG00000001349	ENSRNOG00000029785	ENSRNOG00000004169	ENSRNOG00000016029	ENSRNOG00000058539	ENSRNOG00000026446	ENSRNOG00000011295	ENSRNOG00000012153	ENSRNOG00000010945	ENSRNOG00000047741	ENSRNOG00000032778	ENSRNOG00000015708	ENSRNOG00000018510	ENSRNOG00000001833	ENSRNOG00000013090	ENSRNOG00000003703	ENSRNOG00000002833	ENSRNOG00000000604	ENSRNOG00000008195	ENSRNOG00000012835	ENSRNOG00000016965	ENSRNOG00000018999	ENSRNOG00000002951	ENSRNOG00000018296	ENSRNOG00000000190	ENSRNOG00000037509	ENSRNOG00000025602	ENSRNOG00000003657	ENSRNOG00000010027	ENSRNOG00000001265	ENSRNOG00000007906	ENSRNOG00000020652	ENSRNOG00000057710
Alcoholism	ENSRNOG00000017801	ENSRNOG00000003122	ENSRNOG00000000431	ENSRNOG00000012562	ENSRNOG00000004060	ENSRNOG00000059382	ENSRNOG00000046144	ENSRNOG00000025040	ENSRNOG00000048735	ENSRNOG00000005413	ENSRNOG00000008622	ENSRNOG00000058444	ENSRNOG00000033045	ENSRNOG00000023493	ENSRNOG00000050933	ENSRNOG00000048642	ENSRNOG00000060366	ENSRNOG00000028975	ENSRNOG00000009338	ENSRNOG00000047914	ENSRNOG00000016770	ENSRNOG00000046667	ENSRNOG00000054539	ENSRNOG00000006532	ENSRNOG00000018708	ENSRNOG00000058187	ENSRNOG00000031680	ENSRNOG00000001309	ENSRNOG00000052555	ENSRNOG00000020372	ENSRNOG00000023079	ENSRNOG00000010306	ENSRNOG00000019465	ENSRNOG00000050469	ENSRNOG00000039562	ENSRNOG00000045618	ENSRNOG00000003220	ENSRNOG00000061185	ENSRNOG00000020025	ENSRNOG00000047799	ENSRNOG00000045819	ENSRNOG00000045818	ENSRNOG00000059949	ENSRNOG00000029736	ENSRNOG00000020657	ENSRNOG00000020410	ENSRNOG00000016701	ENSRNOG00000012703	ENSRNOG00000000604
T cell receptor signaling pathway	ENSRNOG00000002079	ENSRNOG00000000513	ENSRNOG00000000515	ENSRNOG00000043210	ENSRNOG00000000596	ENSRNOG00000019883	ENSRNOG00000000837	ENSRNOG00000054129	ENSRNOG00000008111	ENSRNOG00000049342	ENSRNOG00000014312	ENSRNOG00000046089	ENSRNOG00000049830	ENSRNOG00000047797	ENSRNOG00000049773	ENSRNOG00000046292	ENSRNOG00000014917	ENSRNOG00000030888	ENSRNOG00000009705	ENSRNOG00000001982	ENSRNOG00000021497	ENSRNOG00000020063	ENSRNOG00000033801	ENSRNOG00000046646	ENSRNOG00000048670	ENSRNOG00000009338	ENSRNOG00000051843	ENSRNOG00000016846	ENSRNOG00000026805	ENSRNOG00000012175	ENSRNOG00000048203	ENSRNOG00000054269	ENSRNOG00000054267	ENSRNOG00000053359	ENSRNOG00000042119	ENSRNOG00000048115	ENSRNOG00000005404	ENSRNOG00000006984	ENSRNOG00000049928	ENSRNOG00000061828	ENSRNOG00000015945	ENSRNOG00000023079	ENSRNOG00000019043	ENSRNOG00000046976	ENSRNOG00000007925	ENSRNOG00000058237	ENSRNOG00000018677	ENSRNOG00000047444	ENSRNOG00000053791
Th1 and Th2 cell differentiation	ENSRNOG00000002079	ENSRNOG00000000513	ENSRNOG00000000515	ENSRNOG00000043210	ENSRNOG00000026669	ENSRNOG00000026762	ENSRNOG00000047854	ENSRNOG00000049491	ENSRNOG00000000454	ENSRNOG00000032708	ENSRNOG00000000451	ENSRNOG00000003954	ENSRNOG00000033215	ENSRNOG00000030431	ENSRNOG00000032844	ENSRNOG00000019338	ENSRNOG00000051002	ENSRNOG00000018835	ENSRNOG00000047864	ENSRNOG00000008111	ENSRNOG00000049342	ENSRNOG00000014312	ENSRNOG00000046089	ENSRNOG00000049830	ENSRNOG00000047797	ENSRNOG00000049773	ENSRNOG00000046292	ENSRNOG00000005879	ENSRNOG00000030888	ENSRNOG00000009705	ENSRNOG00000020063	ENSRNOG00000033801	ENSRNOG00000046646	ENSRNOG00000048670	ENSRNOG00000051843	ENSRNOG00000019496	ENSRNOG00000012175	ENSRNOG00000048203	ENSRNOG00000054269	ENSRNOG00000054267	ENSRNOG00000053359	ENSRNOG00000004346	ENSRNOG00000042119	ENSRNOG00000048115	ENSRNOG00000007443	ENSRNOG00000007652	ENSRNOG00000006984	ENSRNOG00000049928	ENSRNOG00000061828
Spliceosome	ENSRNOG00000002818	ENSRNOG00000014833	ENSRNOG00000000520	ENSRNOG00000000523	ENSRNOG00000050410	ENSRNOG00000006655	ENSRNOG00000030157	ENSRNOG00000010587	ENSRNOG00000045654	ENSRNOG00000047966	ENSRNOG00000000841	ENSRNOG00000050647	ENSRNOG00000048725	ENSRNOG00000000989	ENSRNOG00000027006	ENSRNOG00000010007	ENSRNOG00000046286	ENSRNOG00000020438	ENSRNOG00000007629	ENSRNOG00000023605	ENSRNOG00000060597	ENSRNOG00000036839	ENSRNOG00000007315	ENSRNOG00000040045	ENSRNOG00000050800	ENSRNOG00000012157	ENSRNOG00000052968	ENSRNOG00000042126	ENSRNOG00000003844	ENSRNOG00000013533	ENSRNOG00000015914	ENSRNOG00000004864	ENSRNOG00000014762	ENSRNOG00000052539	ENSRNOG00000018396	ENSRNOG00000020763	ENSRNOG00000005505	ENSRNOG00000061099	ENSRNOG00000046172	ENSRNOG00000012219	ENSRNOG00000005556	ENSRNOG00000025154	ENSRNOG00000006762	ENSRNOG00000012021	ENSRNOG00000001163	ENSRNOG00000007992	ENSRNOG00000007766	ENSRNOG00000010316	ENSRNOG00000021215
Dilated cardiomyopathy (DCM)	ENSRNOG00000004861	ENSRNOG00000049768	ENSRNOG00000000837	ENSRNOG00000019638	ENSRNOG00000046366	ENSRNOG00000056285	ENSRNOG00000055620	ENSRNOG00000049252	ENSRNOG00000034190	ENSRNOG00000051768	ENSRNOG00000048062	ENSRNOG00000004518	ENSRNOG00000049870	ENSRNOG00000050708	ENSRNOG00000053487	ENSRNOG00000033531	ENSRNOG00000000413	ENSRNOG00000004890	ENSRNOG00000042319	ENSRNOG00000018943	ENSRNOG00000005580	ENSRNOG00000047308	ENSRNOG00000018184	ENSRNOG00000046401	ENSRNOG00000060468	ENSRNOG00000012208	ENSRNOG00000047622	ENSRNOG00000053719	ENSRNOG00000037495	ENSRNOG00000042569	ENSRNOG00000057852	ENSRNOG00000016538	ENSRNOG00000052069	ENSRNOG00000042197	ENSRNOG00000049243	ENSRNOG00000045786	ENSRNOG00000003262	ENSRNOG00000047996	ENSRNOG00000061324	ENSRNOG00000018378	ENSRNOG00000007905	ENSRNOG00000058882	ENSRNOG00000018250	ENSRNOG00000022071	ENSRNOG00000055130	ENSRNOG00000003245	ENSRNOG00000060552	ENSRNOG00000013147	ENSRNOG00000047011
Nucleotide excision repair	ENSRNOG00000019649	ENSRNOG00000022812	ENSRNOG00000003123	ENSRNOG00000001134	ENSRNOG00000000831	ENSRNOG00000018230	ENSRNOG00000009576	ENSRNOG00000008309	ENSRNOG00000053079	ENSRNOG00000007267	ENSRNOG00000001457	ENSRNOG00000009968	ENSRNOG00000016137	ENSRNOG00000018510	ENSRNOG00000001088	ENSRNOG00000008274	ENSRNOG00000037449	ENSRNOG00000020715	ENSRNOG00000019681	ENSRNOG00000006102	ENSRNOG00000004242	ENSRNOG00000052193	ENSRNOG00000048121	ENSRNOG00000001816	ENSRNOG00000047910	ENSRNOG00000014071	ENSRNOG00000014193	ENSRNOG00000058914	ENSRNOG00000013180	ENSRNOG00000021264	ENSRNOG00000003026	ENSRNOG00000031656	ENSRNOG00000002585	ENSRNOG00000014098	ENSRNOG00000004843	ENSRNOG00000001035	ENSRNOG00000030017	ENSRNOG00000002855	ENSRNOG00000059593	ENSRNOG00000018007	ENSRNOG00000018765	ENSRNOG00000013005	ENSRNOG00000018411	ENSRNOG00000047206	ENSRNOG00000055277	ENSRNOG00000012360	ENSRNOG00000037481	ENSRNOG00000047487	ENSRNOG00000017839
Graft-versus-host disease	ENSRNOG00000049590	ENSRNOG00000000763	ENSRNOG00000026669	ENSRNOG00000026762	ENSRNOG00000047854	ENSRNOG00000002978	ENSRNOG00000049491	ENSRNOG00000048951	ENSRNOG00000031090	ENSRNOG00000000454	ENSRNOG00000000837	ENSRNOG00000050998	ENSRNOG00000000723	ENSRNOG00000050183	ENSRNOG00000039744	ENSRNOG00000032708	ENSRNOG00000031607	ENSRNOG00000061639	ENSRNOG00000000451	ENSRNOG00000033215	ENSRNOG00000030431	ENSRNOG00000032844	ENSRNOG00000029001	ENSRNOG00000029386	ENSRNOG00000045924	ENSRNOG00000000795	ENSRNOG00000042905	ENSRNOG00000032596	ENSRNOG00000000787	ENSRNOG00000000777	ENSRNOG00000033136	ENSRNOG00000060412	ENSRNOG00000040052	ENSRNOG00000022107	ENSRNOG00000059770	ENSRNOG00000047706	ENSRNOG00000051002	ENSRNOG00000047864	ENSRNOG00000030712	ENSRNOG00000038999	ENSRNOG00000049342	ENSRNOG00000014312	ENSRNOG00000046089	ENSRNOG00000049830	ENSRNOG00000047797	ENSRNOG00000049773	ENSRNOG00000046292	ENSRNOG00000033801	ENSRNOG00000046646
Th17 cell differentiation	ENSRNOG00000002079	ENSRNOG00000000513	ENSRNOG00000000515	ENSRNOG00000000464	ENSRNOG00000043210	ENSRNOG00000026669	ENSRNOG00000026762	ENSRNOG00000061070	ENSRNOG00000047854	ENSRNOG00000049491	ENSRNOG00000051120	ENSRNOG00000000454	ENSRNOG00000032708	ENSRNOG00000000451	ENSRNOG00000003954	ENSRNOG00000033215	ENSRNOG00000030431	ENSRNOG00000032844	ENSRNOG00000051002	ENSRNOG00000047864	ENSRNOG00000049342	ENSRNOG00000014312	ENSRNOG00000046089	ENSRNOG00000049830	ENSRNOG00000047797	ENSRNOG00000049773	ENSRNOG00000046292	ENSRNOG00000030888	ENSRNOG00000017376	ENSRNOG00000009705	ENSRNOG00000020063	ENSRNOG00000033801	ENSRNOG00000046646	ENSRNOG00000048670	ENSRNOG00000051843	ENSRNOG00000019496	ENSRNOG00000019742	ENSRNOG00000012175	ENSRNOG00000010278	ENSRNOG00000003254	ENSRNOG00000048203	ENSRNOG00000054269	ENSRNOG00000027145	ENSRNOG00000054267	ENSRNOG00000053359	ENSRNOG00000042119	ENSRNOG00000048115	ENSRNOG00000006984	ENSRNOG00000049928
Type I diabetes mellitus	ENSRNOG00000049590	ENSRNOG00000000763	ENSRNOG00000026669	ENSRNOG00000026762	ENSRNOG00000047854	ENSRNOG00000002978	ENSRNOG00000049491	ENSRNOG00000048951	ENSRNOG00000031090	ENSRNOG00000000454	ENSRNOG00000000837	ENSRNOG00000050998	ENSRNOG00000000723	ENSRNOG00000000838	ENSRNOG00000050183	ENSRNOG00000039744	ENSRNOG00000032708	ENSRNOG00000031607	ENSRNOG00000061639	ENSRNOG00000000451	ENSRNOG00000033215	ENSRNOG00000030431	ENSRNOG00000032844	ENSRNOG00000029001	ENSRNOG00000029386	ENSRNOG00000045924	ENSRNOG00000000795	ENSRNOG00000042905	ENSRNOG00000032596	ENSRNOG00000000787	ENSRNOG00000000777	ENSRNOG00000033136	ENSRNOG00000060412	ENSRNOG00000040052	ENSRNOG00000022107	ENSRNOG00000059770	ENSRNOG00000047706	ENSRNOG00000051002	ENSRNOG00000047864	ENSRNOG00000030712	ENSRNOG00000038999	ENSRNOG00000049342	ENSRNOG00000014312	ENSRNOG00000046089	ENSRNOG00000049830	ENSRNOG00000047797	ENSRNOG00000049773	ENSRNOG00000046292	ENSRNOG00000033801
RNA transport	ENSRNOG00000017397	ENSRNOG00000019634	ENSRNOG00000039994	ENSRNOG00000020134	ENSRNOG00000052343	ENSRNOG00000000786	ENSRNOG00000023393	ENSRNOG00000060793	ENSRNOG00000000841	ENSRNOG00000060048	ENSRNOG00000023593	ENSRNOG00000012582	ENSRNOG00000001039	ENSRNOG00000033765	ENSRNOG00000010103	ENSRNOG00000018067	ENSRNOG00000018812	ENSRNOG00000007134	ENSRNOG00000002394	ENSRNOG00000023605	ENSRNOG00000013411	ENSRNOG00000049598	ENSRNOG00000058130	ENSRNOG00000027332	ENSRNOG00000006557	ENSRNOG00000038174	ENSRNOG00000007315	ENSRNOG00000005243	ENSRNOG00000025310	ENSRNOG00000003354	ENSRNOG00000057464	ENSRNOG00000002645	ENSRNOG00000058580	ENSRNOG00000030628	ENSRNOG00000010218	ENSRNOG00000031013	ENSRNOG00000013533	ENSRNOG00000038025	ENSRNOG00000012788	ENSRNOG00000017907	ENSRNOG00000010435	ENSRNOG00000028592	ENSRNOG00000013423	ENSRNOG00000018564	ENSRNOG00000004360	ENSRNOG00000001253	ENSRNOG00000006541	ENSRNOG00000014368	ENSRNOG00000048985
Viral carcinogenesis	ENSRNOG00000017801	ENSRNOG00000000485	ENSRNOG00000049590	ENSRNOG00000000804	ENSRNOG00000000763	ENSRNOG00000048914	ENSRNOG00000048951	ENSRNOG00000031090	ENSRNOG00000050998	ENSRNOG00000000723	ENSRNOG00000050183	ENSRNOG00000039744	ENSRNOG00000031607	ENSRNOG00000061639	ENSRNOG00000017235	ENSRNOG00000001068	ENSRNOG00000017828	ENSRNOG00000017219	ENSRNOG00000004300	ENSRNOG00000029001	ENSRNOG00000029386	ENSRNOG00000000831	ENSRNOG00000049115	ENSRNOG00000003122	ENSRNOG00000045924	ENSRNOG00000000795	ENSRNOG00000042905	ENSRNOG00000032596	ENSRNOG00000000787	ENSRNOG00000000777	ENSRNOG00000000431	ENSRNOG00000033136	ENSRNOG00000060412	ENSRNOG00000040052	ENSRNOG00000022107	ENSRNOG00000028415	ENSRNOG00000059770	ENSRNOG00000047706	ENSRNOG00000030712	ENSRNOG00000038999	ENSRNOG00000003951	ENSRNOG00000059382	ENSRNOG00000030888	ENSRNOG00000048735	ENSRNOG00000012160	ENSRNOG00000005413	ENSRNOG00000008622	ENSRNOG00000058444	ENSRNOG00000023493
Proteasome	ENSRNOG00000007851	ENSRNOG00000000459	ENSRNOG00000000456	ENSRNOG00000013493	ENSRNOG00000014097	ENSRNOG00000051344	ENSRNOG00000003951	ENSRNOG00000061129	ENSRNOG00000009640	ENSRNOG00000019041	ENSRNOG00000019551	ENSRNOG00000006751	ENSRNOG00000017730	ENSRNOG00000010420	ENSRNOG00000007468	ENSRNOG00000049150	ENSRNOG00000030363	ENSRNOG00000037580	ENSRNOG00000019494	ENSRNOG00000011732	ENSRNOG00000060340	ENSRNOG00000020979	ENSRNOG00000049920	ENSRNOG00000001719	ENSRNOG00000056853	ENSRNOG00000019868	ENSRNOG00000019246	ENSRNOG00000049229	ENSRNOG00000052730	ENSRNOG00000011745	ENSRNOG00000038259	ENSRNOG00000048470	ENSRNOG00000061359	ENSRNOG00000003117	ENSRNOG00000001488	ENSRNOG00000011414	ENSRNOG00000047091	ENSRNOG00000014109	ENSRNOG00000011827	ENSRNOG00000013386	ENSRNOG00000011463	ENSRNOG00000005538	ENSRNOG00000028103	ENSRNOG00000007114	ENSRNOG00000018994	ENSRNOG00000021042	ENSRNOG00000007203	ENSRNOG00000012026	ENSRNOG00000010038
Antigen processing and presentation	ENSRNOG00000049590	ENSRNOG00000000763	ENSRNOG00000026669	ENSRNOG00000026762	ENSRNOG00000047854	ENSRNOG00000049491	ENSRNOG00000000457	ENSRNOG00000045654	ENSRNOG00000048951	ENSRNOG00000000455	ENSRNOG00000031090	ENSRNOG00000000454	ENSRNOG00000000837	ENSRNOG00000047966	ENSRNOG00000050647	ENSRNOG00000050998	ENSRNOG00000000723	ENSRNOG00000050183	ENSRNOG00000039744	ENSRNOG00000032708	ENSRNOG00000031607	ENSRNOG00000061639	ENSRNOG00000000451	ENSRNOG00000033215	ENSRNOG00000030431	ENSRNOG00000032844	ENSRNOG00000029001	ENSRNOG00000029386	ENSRNOG00000045924	ENSRNOG00000000795	ENSRNOG00000042905	ENSRNOG00000032596	ENSRNOG00000000787	ENSRNOG00000000777	ENSRNOG00000033136	ENSRNOG00000060412	ENSRNOG00000040052	ENSRNOG00000022107	ENSRNOG00000059770	ENSRNOG00000047706	ENSRNOG00000051002	ENSRNOG00000047864	ENSRNOG00000051344	ENSRNOG00000030712	ENSRNOG00000038999	ENSRNOG00000029500	ENSRNOG00000049342	ENSRNOG00000014312	ENSRNOG00000046089
HTLV-I infection	ENSRNOG00000017536	ENSRNOG00000017801	ENSRNOG00000039980	ENSRNOG00000049590	ENSRNOG00000002079	ENSRNOG00000043210	ENSRNOG00000000763	ENSRNOG00000026669	ENSRNOG00000026762	ENSRNOG00000047854	ENSRNOG00000049768	ENSRNOG00000049491	ENSRNOG00000058388	ENSRNOG00000029273	ENSRNOG00000038398	ENSRNOG00000048951	ENSRNOG00000031090	ENSRNOG00000000454	ENSRNOG00000000837	ENSRNOG00000050998	ENSRNOG00000000723	ENSRNOG00000000838	ENSRNOG00000050183	ENSRNOG00000039744	ENSRNOG00000032708	ENSRNOG00000031607	ENSRNOG00000061639	ENSRNOG00000000451	ENSRNOG00000003954	ENSRNOG00000033215	ENSRNOG00000017219	ENSRNOG00000030431	ENSRNOG00000032844	ENSRNOG00000029001	ENSRNOG00000029386	ENSRNOG00000045924	ENSRNOG00000000795	ENSRNOG00000042905	ENSRNOG00000032596	ENSRNOG00000000787	ENSRNOG00000000777	ENSRNOG00000004500	ENSRNOG00000000431	ENSRNOG00000033136	ENSRNOG00000060412	ENSRNOG00000040052	ENSRNOG00000022107	ENSRNOG00000028415	ENSRNOG00000059770
Necroptosis	ENSRNOG00000039980	ENSRNOG00000057367	ENSRNOG00000027864	ENSRNOG00000002079	ENSRNOG00000002978	ENSRNOG00000055068	ENSRNOG00000002791	ENSRNOG00000038398	ENSRNOG00000000837	ENSRNOG00000038483	ENSRNOG00000047035	ENSRNOG00000021726	ENSRNOG00000007372	ENSRNOG00000003170	ENSRNOG00000023094	ENSRNOG00000010830	ENSRNOG00000009783	ENSRNOG00000032424	ENSRNOG00000003084	ENSRNOG00000052145	ENSRNOG00000008672	ENSRNOG00000033045	ENSRNOG00000006268	ENSRNOG00000019496	ENSRNOG00000019742	ENSRNOG00000012439	ENSRNOG00000001813	ENSRNOG00000038437	ENSRNOG00000007583	ENSRNOG00000004575	ENSRNOG00000029082	ENSRNOG00000052555	ENSRNOG00000059968	ENSRNOG00000011589	ENSRNOG00000048318	ENSRNOG00000038347	ENSRNOG00000010306	ENSRNOG00000008523	ENSRNOG00000019142	ENSRNOG00000006314	ENSRNOG00000007468	ENSRNOG00000045819	ENSRNOG00000010238	ENSRNOG00000020465	ENSRNOG00000048574	ENSRNOG00000004014	ENSRNOG00000026764	ENSRNOG00000002705	ENSRNOG00000027408
RNA polymerase	ENSRNOG00000016260	ENSRNOG00000012664	ENSRNOG00000013545	ENSRNOG00000000779	ENSRNOG00000015720	ENSRNOG00000048562	ENSRNOG00000020799	ENSRNOG00000018349	ENSRNOG00000033560	ENSRNOG00000049116	ENSRNOG00000050560	ENSRNOG00000007548	ENSRNOG00000004471	ENSRNOG00000016231	ENSRNOG00000019079	ENSRNOG00000019293	ENSRNOG00000001748	ENSRNOG00000007432	ENSRNOG00000010028	ENSRNOG00000010750	ENSRNOG00000017843	ENSRNOG00000010408	ENSRNOG00000023805	ENSRNOG00000028834	ENSRNOG00000009545	ENSRNOG00000016960	ENSRNOG00000019439	ENSRNOG00000011214	ENSRNOG00000001430	ENSRNOG00000021209	ENSRNOG00000024779	ENSRNOG00000010008
Fanconi anemia pathway	ENSRNOG00000001111	ENSRNOG00000056721	ENSRNOG00000001040	ENSRNOG00000003123	ENSRNOG00000000593	ENSRNOG00000008309	ENSRNOG00000053079	ENSRNOG00000016942	ENSRNOG00000005099	ENSRNOG00000024445	ENSRNOG00000016889	ENSRNOG00000025126	ENSRNOG00000001720	ENSRNOG00000020670	ENSRNOG00000003346	ENSRNOG00000021902	ENSRNOG00000007890	ENSRNOG00000016706	ENSRNOG00000016689	ENSRNOG00000048121	ENSRNOG00000037302	ENSRNOG00000019108	ENSRNOG00000010027	ENSRNOG00000036699	ENSRNOG00000027249	ENSRNOG00000057945	ENSRNOG00000057080	ENSRNOG00000020701	ENSRNOG00000060626	ENSRNOG00000061085	ENSRNOG00000012111	ENSRNOG00000000504	ENSRNOG00000019369	ENSRNOG00000011213	ENSRNOG00000018623	ENSRNOG00000016774	ENSRNOG00000022393	ENSRNOG00000006661	ENSRNOG00000059997	ENSRNOG00000027929	ENSRNOG00000019195	ENSRNOG00000001845	ENSRNOG00000020617	ENSRNOG00000024867	ENSRNOG00000024420	ENSRNOG00000013005	ENSRNOG00000023985	ENSRNOG00000005038	ENSRNOG00000033809
Platelet activation	ENSRNOG00000052795	ENSRNOG00000020425	ENSRNOG00000000513	ENSRNOG00000000515	ENSRNOG00000029876	ENSRNOG00000000596	ENSRNOG00000007092	ENSRNOG00000049768	ENSRNOG00000013902	ENSRNOG00000038540	ENSRNOG00000046981	ENSRNOG00000012160	ENSRNOG00000046663	ENSRNOG00000002215	ENSRNOG00000004890	ENSRNOG00000021497	ENSRNOG00000021789	ENSRNOG00000016846	ENSRNOG00000007048	ENSRNOG00000050552	ENSRNOG00000018708	ENSRNOG00000005404	ENSRNOG00000006984	ENSRNOG00000004810	ENSRNOG00000016630	ENSRNOG00000007415	ENSRNOG00000015733	ENSRNOG00000019465	ENSRNOG00000009495	ENSRNOG00000025959	ENSRNOG00000012060	ENSRNOG00000017546	ENSRNOG00000018677	ENSRNOG00000054945	ENSRNOG00000021150	ENSRNOG00000014232	ENSRNOG00000008235	ENSRNOG00000022071	ENSRNOG00000058337	ENSRNOG00000004496	ENSRNOG00000026764	ENSRNOG00000008180	ENSRNOG00000000145	ENSRNOG00000061705	ENSRNOG00000020130	ENSRNOG00000052407	ENSRNOG00000051986	ENSRNOG00000004925	ENSRNOG00000053452
Apoptosis - multiple species	ENSRNOG00000000485	ENSRNOG00000002079	ENSRNOG00000002791	ENSRNOG00000047035	ENSRNOG00000007367	ENSRNOG00000020513	ENSRNOG00000038076	ENSRNOG00000012944	ENSRNOG00000022448	ENSRNOG00000056216	ENSRNOG00000012439	ENSRNOG00000008022	ENSRNOG00000029197	ENSRNOG00000012331	ENSRNOG00000020155	ENSRNOG00000020876	ENSRNOG00000002823	ENSRNOG00000010602	ENSRNOG00000018214	ENSRNOG00000005392	ENSRNOG00000033559	ENSRNOG00000005731	ENSRNOG00000007946	ENSRNOG00000033924	ENSRNOG00000032885	ENSRNOG00000008548	ENSRNOG00000018770	ENSRNOG00000027191	ENSRNOG00000050819	ENSRNOG00000010452	ENSRNOG00000018503	ENSRNOG00000043311	ENSRNOG00000010475	ENSRNOG00000029613	ENSRNOG00000031312	ENSRNOG00000006967	ENSRNOG00000016551
Leukocyte transendothelial migration	ENSRNOG00000054495	ENSRNOG00000010085	ENSRNOG00000004861	ENSRNOG00000000513	ENSRNOG00000000515	ENSRNOG00000001480	ENSRNOG00000001068	ENSRNOG00000030118	ENSRNOG00000013014	ENSRNOG00000009149	ENSRNOG00000000373	ENSRNOG00000045811	ENSRNOG00000046007	ENSRNOG00000000378	ENSRNOG00000003648	ENSRNOG00000001571	ENSRNOG00000016846	ENSRNOG00000007048	ENSRNOG00000006984	ENSRNOG00000007350	ENSRNOG00000015733	ENSRNOG00000054121	ENSRNOG00000019465	ENSRNOG00000013324	ENSRNOG00000011424	ENSRNOG00000001691	ENSRNOG00000013536	ENSRNOG00000002540	ENSRNOG00000006604	ENSRNOG00000014409	ENSRNOG00000023753	ENSRNOG00000005342	ENSRNOG00000004496	ENSRNOG00000030790	ENSRNOG00000018148	ENSRNOG00000007422	ENSRNOG00000020726	ENSRNOG00000000145	ENSRNOG00000051986	ENSRNOG00000001476	ENSRNOG00000001419	ENSRNOG00000017539	ENSRNOG00000053452	ENSRNOG00000042848	ENSRNOG00000027839	ENSRNOG00000042954	ENSRNOG00000056810	ENSRNOG00000004414	ENSRNOG00000023622
Inflammatiory bowel disease (IBD)	ENSRNOG00000026669	ENSRNOG00000026762	ENSRNOG00000047854	ENSRNOG00000049491	ENSRNOG00000000454	ENSRNOG00000000837	ENSRNOG00000032708	ENSRNOG00000000451	ENSRNOG00000003954	ENSRNOG00000033215	ENSRNOG00000030431	ENSRNOG00000032844	ENSRNOG00000051002	ENSRNOG00000047864	ENSRNOG00000008111	ENSRNOG00000049342	ENSRNOG00000014312	ENSRNOG00000046089	ENSRNOG00000049830	ENSRNOG00000047797	ENSRNOG00000049773	ENSRNOG00000046292	ENSRNOG00000030888	ENSRNOG00000017376	ENSRNOG00000033801	ENSRNOG00000046646	ENSRNOG00000048670	ENSRNOG00000051843	ENSRNOG00000015027	ENSRNOG00000019742	ENSRNOG00000010278	ENSRNOG00000003254	ENSRNOG00000048203	ENSRNOG00000054269	ENSRNOG00000027145	ENSRNOG00000054267	ENSRNOG00000053359	ENSRNOG00000042119	ENSRNOG00000048115	ENSRNOG00000007652	ENSRNOG00000004575	ENSRNOG00000049928	ENSRNOG00000061828	ENSRNOG00000046976	ENSRNOG00000009848	ENSRNOG00000058237	ENSRNOG00000012467	ENSRNOG00000022067	ENSRNOG00000047444
Parkinson disease	ENSRNOG00000030644	ENSRNOG00000031033	ENSRNOG00000034234	ENSRNOG00000030371	ENSRNOG00000033299	ENSRNOG00000031979	ENSRNOG00000030700	ENSRNOG00000033615	ENSRNOG00000031053	ENSRNOG00000029707	ENSRNOG00000029971	ENSRNOG00000029042	ENSRNOG00000031766	ENSRNOG00000039980	ENSRNOG00000052226	ENSRNOG00000016660	ENSRNOG00000023387	ENSRNOG00000049394	ENSRNOG00000052326	ENSRNOG00000007434	ENSRNOG00000038398	ENSRNOG00000062245	ENSRNOG00000054689	ENSRNOG00000016000	ENSRNOG00000046299	ENSRNOG00000017817	ENSRNOG00000020602	ENSRNOG00000010830	ENSRNOG00000012944	ENSRNOG00000022448	ENSRNOG00000059061	ENSRNOG00000021177	ENSRNOG00000018816	ENSRNOG00000027593	ENSRNOG00000004526	ENSRNOG00000054620	ENSRNOG00000038218	ENSRNOG00000040005	ENSRNOG00000038616	ENSRNOG00000001991	ENSRNOG00000017571	ENSRNOG00000016952	ENSRNOG00000021688	ENSRNOG00000008022	ENSRNOG00000032134	ENSRNOG00000019465	ENSRNOG00000034161	ENSRNOG00000018281	ENSRNOG00000010041
Measles	ENSRNOG00000000485	ENSRNOG00000002079	ENSRNOG00000002978	ENSRNOG00000001050	ENSRNOG00000002791	ENSRNOG00000045654	ENSRNOG00000047966	ENSRNOG00000050647	ENSRNOG00000003954	ENSRNOG00000000847	ENSRNOG00000030118	ENSRNOG00000047035	ENSRNOG00000049342	ENSRNOG00000014312	ENSRNOG00000046089	ENSRNOG00000049830	ENSRNOG00000047797	ENSRNOG00000049773	ENSRNOG00000046292	ENSRNOG00000030888	ENSRNOG00000012944	ENSRNOG00000052145	ENSRNOG00000001982	ENSRNOG00000021497	ENSRNOG00000006268	ENSRNOG00000020063	ENSRNOG00000033801	ENSRNOG00000048161	ENSRNOG00000046646	ENSRNOG00000048670	ENSRNOG00000051843	ENSRNOG00000016846	ENSRNOG00000019496	ENSRNOG00000019742	ENSRNOG00000012439	ENSRNOG00000001017	ENSRNOG00000010278	ENSRNOG00000048203	ENSRNOG00000030443	ENSRNOG00000054269	ENSRNOG00000054267	ENSRNOG00000053359	ENSRNOG00000029881	ENSRNOG00000042119	ENSRNOG00000048115	ENSRNOG00000059073	ENSRNOG00000004575	ENSRNOG00000049928	ENSRNOG00000061828
PD-L1 expression and PD-1 checkpoint pathway in cancer	ENSRNOG00000000513	ENSRNOG00000000515	ENSRNOG00000043210	ENSRNOG00000051964	ENSRNOG00000000847	ENSRNOG00000049342	ENSRNOG00000014312	ENSRNOG00000046089	ENSRNOG00000049830	ENSRNOG00000047797	ENSRNOG00000049773	ENSRNOG00000046292	ENSRNOG00000030888	ENSRNOG00000009705	ENSRNOG00000021497	ENSRNOG00000030294	ENSRNOG00000020063	ENSRNOG00000033801	ENSRNOG00000048161	ENSRNOG00000046646	ENSRNOG00000048670	ENSRNOG00000003919	ENSRNOG00000009338	ENSRNOG00000051843	ENSRNOG00000016846	ENSRNOG00000019742	ENSRNOG00000012175	ENSRNOG00000048203	ENSRNOG00000054269	ENSRNOG00000054267	ENSRNOG00000053359	ENSRNOG00000042119	ENSRNOG00000048115	ENSRNOG00000005404	ENSRNOG00000006984	ENSRNOG00000004437	ENSRNOG00000049928	ENSRNOG00000061828	ENSRNOG00000059968	ENSRNOG00000015945	ENSRNOG00000023079	ENSRNOG00000019043	ENSRNOG00000046976	ENSRNOG00000058237	ENSRNOG00000018677	ENSRNOG00000047444	ENSRNOG00000053791	ENSRNOG00000046956	ENSRNOG00000007468
PI3K-Akt signaling pathway	ENSRNOG00000002548	ENSRNOG00000043451	ENSRNOG00000017801	ENSRNOG00000019634	ENSRNOG00000004861	ENSRNOG00000048472	ENSRNOG00000029986	ENSRNOG00000051964	ENSRNOG00000013953	ENSRNOG00000029148	ENSRNOG00000000299	ENSRNOG00000007607	ENSRNOG00000020618	ENSRNOG00000056212	ENSRNOG00000052343	ENSRNOG00000002978	ENSRNOG00000002227	ENSRNOG00000002791	ENSRNOG00000011300	ENSRNOG00000001068	ENSRNOG00000002667	ENSRNOG00000003954	ENSRNOG00000002680	ENSRNOG00000012582	ENSRNOG00000014851	ENSRNOG00000010103	ENSRNOG00000004500	ENSRNOG00000000431	ENSRNOG00000061530	ENSRNOG00000051171	ENSRNOG00000002468	ENSRNOG00000016307	ENSRNOG00000039075	ENSRNOG00000011470	ENSRNOG00000047649	ENSRNOG00000056285	ENSRNOG00000055620	ENSRNOG00000049252	ENSRNOG00000034190	ENSRNOG00000051768	ENSRNOG00000020899	ENSRNOG00000048062	ENSRNOG00000030888	ENSRNOG00000025040	ENSRNOG00000049870	ENSRNOG00000012160	ENSRNOG00000050708	ENSRNOG00000012944	ENSRNOG00000005413
mRNA surveillance pathway	ENSRNOG00000017397	ENSRNOG00000039994	ENSRNOG00000012089	ENSRNOG00000020134	ENSRNOG00000003041	ENSRNOG00000019590	ENSRNOG00000027962	ENSRNOG00000000841	ENSRNOG00000023593	ENSRNOG00000048817	ENSRNOG00000000985	ENSRNOG00000048441	ENSRNOG00000023605	ENSRNOG00000058130	ENSRNOG00000005927	ENSRNOG00000005389	ENSRNOG00000004827	ENSRNOG00000003354	ENSRNOG00000014531	ENSRNOG00000006261	ENSRNOG00000018708	ENSRNOG00000020668	ENSRNOG00000011382	ENSRNOG00000013533	ENSRNOG00000028592	ENSRNOG00000019450	ENSRNOG00000030705	ENSRNOG00000018851	ENSRNOG00000052418	ENSRNOG00000046271	ENSRNOG00000011158	ENSRNOG00000020771	ENSRNOG00000004775	ENSRNOG00000010316	ENSRNOG00000005733	ENSRNOG00000049415	ENSRNOG00000001156	ENSRNOG00000031387	ENSRNOG00000021215	ENSRNOG00000045791	ENSRNOG00000049270	ENSRNOG00000014353	ENSRNOG00000025338	ENSRNOG00000011282	ENSRNOG00000029749	ENSRNOG00000023256	ENSRNOG00000012750	ENSRNOG00000007416	ENSRNOG00000042195
Human immunodeficiency virus 1 infection	ENSRNOG00000017285	ENSRNOG00000000485	ENSRNOG00000052795	ENSRNOG00000049590	ENSRNOG00000002079	ENSRNOG00000000513	ENSRNOG00000000515	ENSRNOG00000043210	ENSRNOG00000019649	ENSRNOG00000000763	ENSRNOG00000005310	ENSRNOG00000051063	ENSRNOG00000019883	ENSRNOG00000002978	ENSRNOG00000000457	ENSRNOG00000002791	ENSRNOG00000048951	ENSRNOG00000000455	ENSRNOG00000031090	ENSRNOG00000000837	ENSRNOG00000050998	ENSRNOG00000000723	ENSRNOG00000050183	ENSRNOG00000039744	ENSRNOG00000031607	ENSRNOG00000061639	ENSRNOG00000001068	ENSRNOG00000029001	ENSRNOG00000029386	ENSRNOG00000049115	ENSRNOG00000045924	ENSRNOG00000000795	ENSRNOG00000042905	ENSRNOG00000032596	ENSRNOG00000000787	ENSRNOG00000000777	ENSRNOG00000033136	ENSRNOG00000060412	ENSRNOG00000047035	ENSRNOG00000040052	ENSRNOG00000022107	ENSRNOG00000059770	ENSRNOG00000047706	ENSRNOG00000030712	ENSRNOG00000038999	ENSRNOG00000029500	ENSRNOG00000004060	ENSRNOG00000049342	ENSRNOG00000014312
Ribosome biogenesis in eukaryotes	ENSRNOG00000013285	ENSRNOG00000055562	ENSRNOG00000047513	ENSRNOG00000061146	ENSRNOG00000010409	ENSRNOG00000006576	ENSRNOG00000000847	ENSRNOG00000039848	ENSRNOG00000002509	ENSRNOG00000018812	ENSRNOG00000028461	ENSRNOG00000001727	ENSRNOG00000005243	ENSRNOG00000025310	ENSRNOG00000019229	ENSRNOG00000003629	ENSRNOG00000026108	ENSRNOG00000031013	ENSRNOG00000038025	ENSRNOG00000014209	ENSRNOG00000015491	ENSRNOG00000012828	ENSRNOG00000042951	ENSRNOG00000025154	ENSRNOG00000006762	ENSRNOG00000014513	ENSRNOG00000032723	ENSRNOG00000017916	ENSRNOG00000016486	ENSRNOG00000004247	ENSRNOG00000008663	ENSRNOG00000015303	ENSRNOG00000004723	ENSRNOG00000000888	ENSRNOG00000019670	ENSRNOG00000000938	ENSRNOG00000011785	ENSRNOG00000014049	ENSRNOG00000020333	ENSRNOG00000023256	ENSRNOG00000012692	ENSRNOG00000061707	ENSRNOG00000019069	ENSRNOG00000013429	ENSRNOG00000007128	ENSRNOG00000004700	ENSRNOG00000005012	ENSRNOG00000005681	ENSRNOG00000018939
Aminoacyl-tRNA biosynthesis	ENSRNOG00000014616	ENSRNOG00000002813	ENSRNOG00000018304	ENSRNOG00000037655	ENSRNOG00000000867	ENSRNOG00000003743	ENSRNOG00000000833	ENSRNOG00000024460	ENSRNOG00000020651	ENSRNOG00000050002	ENSRNOG00000018404	ENSRNOG00000025808	ENSRNOG00000048668	ENSRNOG00000045621	ENSRNOG00000014119	ENSRNOG00000017852	ENSRNOG00000028105	ENSRNOG00000008643	ENSRNOG00000007739	ENSRNOG00000011052	ENSRNOG00000019962	ENSRNOG00000020255	ENSRNOG00000030580	ENSRNOG00000057194	ENSRNOG00000004760	ENSRNOG00000026049	ENSRNOG00000007213	ENSRNOG00000014526	ENSRNOG00000019508	ENSRNOG00000016135	ENSRNOG00000052977	ENSRNOG00000020605	ENSRNOG00000001161	ENSRNOG00000011476	ENSRNOG00000060912	ENSRNOG00000004359	ENSRNOG00000019456	ENSRNOG00000014602	ENSRNOG00000002393	ENSRNOG00000025353	ENSRNOG00000007327	ENSRNOG00000037452	ENSRNOG00000025252	ENSRNOG00000019023	ENSRNOG00000025459	ENSRNOG00000002368	ENSRNOG00000016087	ENSRNOG00000049244	ENSRNOG00000003149
Chemokine signaling pathway	ENSRNOG00000014269	ENSRNOG00000048239	ENSRNOG00000001480	ENSRNOG00000000299	ENSRNOG00000049768	ENSRNOG00000010906	ENSRNOG00000001068	ENSRNOG00000028548	ENSRNOG00000030021	ENSRNOG00000011205	ENSRNOG00000011406	ENSRNOG00000003305	ENSRNOG00000059979	ENSRNOG00000049115	ENSRNOG00000018430	ENSRNOG00000016346	ENSRNOG00000030888	ENSRNOG00000012430	ENSRNOG00000025040	ENSRNOG00000020275	ENSRNOG00000059640	ENSRNOG00000004890	ENSRNOG00000021497	ENSRNOG00000020063	ENSRNOG00000048172	ENSRNOG00000009338	ENSRNOG00000047914	ENSRNOG00000016846	ENSRNOG00000019742	ENSRNOG00000007048	ENSRNOG00000026647	ENSRNOG00000006952	ENSRNOG00000024899	ENSRNOG00000004810	ENSRNOG00000059968	ENSRNOG00000007350	ENSRNOG00000023079	ENSRNOG00000019465	ENSRNOG00000009495	ENSRNOG00000018677	ENSRNOG00000002843	ENSRNOG00000025792	ENSRNOG00000013536	ENSRNOG00000001868	ENSRNOG00000050469	ENSRNOG00000039562	ENSRNOG00000021150	ENSRNOG00000047799	ENSRNOG00000058337
Non-small cell lung cancer	ENSRNOG00000000485	ENSRNOG00000000464	ENSRNOG00000051964	ENSRNOG00000000299	ENSRNOG00000029273	ENSRNOG00000024061	ENSRNOG00000012944	ENSRNOG00000021497	ENSRNOG00000030294	ENSRNOG00000009338	ENSRNOG00000016846	ENSRNOG00000019496	ENSRNOG00000019742	ENSRNOG00000016029	ENSRNOG00000023079	ENSRNOG00000018677	ENSRNOG00000047741	ENSRNOG00000005342	ENSRNOG00000013090	ENSRNOG00000000145	ENSRNOG00000019075	ENSRNOG00000006450	ENSRNOG00000051986	ENSRNOG00000004826	ENSRNOG00000056810	ENSRNOG00000010957	ENSRNOG00000020876	ENSRNOG00000023622	ENSRNOG00000025602	ENSRNOG00000008683	ENSRNOG00000056371	ENSRNOG00000001849	ENSRNOG00000037360	ENSRNOG00000016384	ENSRNOG00000014071	ENSRNOG00000051490	ENSRNOG00000018903	ENSRNOG00000060626	ENSRNOG00000003491	ENSRNOG00000006136	ENSRNOG00000020005	ENSRNOG00000016611	ENSRNOG00000019822	ENSRNOG00000010153	ENSRNOG00000010838	ENSRNOG00000016182	ENSRNOG00000059837	ENSRNOG00000020918	ENSRNOG00000007106
Platinum drug resistance	ENSRNOG00000028746	ENSRNOG00000012801	ENSRNOG00000049964	ENSRNOG00000000485	ENSRNOG00000015796	ENSRNOG00000016134	ENSRNOG00000002978	ENSRNOG00000002791	ENSRNOG00000047035	ENSRNOG00000061367	ENSRNOG00000013484	ENSRNOG00000033402	ENSRNOG00000012944	ENSRNOG00000000593	ENSRNOG00000021497	ENSRNOG00000014475	ENSRNOG00000009576	ENSRNOG00000024755	ENSRNOG00000019017	ENSRNOG00000016846	ENSRNOG00000012439	ENSRNOG00000019058	ENSRNOG00000060939	ENSRNOG00000008022	ENSRNOG00000053047	ENSRNOG00000018677	ENSRNOG00000019142	ENSRNOG00000038300	ENSRNOG00000012878	ENSRNOG00000019221	ENSRNOG00000000145	ENSRNOG00000006450	ENSRNOG00000012331	ENSRNOG00000056810	ENSRNOG00000029726	ENSRNOG00000020876	ENSRNOG00000023622	ENSRNOG00000056371	ENSRNOG00000001849	ENSRNOG00000007743	ENSRNOG00000061857	ENSRNOG00000010602	ENSRNOG00000018237	ENSRNOG00000016384	ENSRNOG00000004245	ENSRNOG00000033559	ENSRNOG00000020701	ENSRNOG00000018903	ENSRNOG00000006304
Toll and Imd signaling pathway	ENSRNOG00000002079	ENSRNOG00000000513	ENSRNOG00000000515	ENSRNOG00000047035	ENSRNOG00000006984	ENSRNOG00000017395	ENSRNOG00000016054	ENSRNOG00000008523	ENSRNOG00000018241	ENSRNOG00000022456	ENSRNOG00000033348	ENSRNOG00000056621	ENSRNOG00000004395	ENSRNOG00000005965	ENSRNOG00000012331	ENSRNOG00000011076	ENSRNOG00000020155	ENSRNOG00000013634	ENSRNOG00000029497	ENSRNOG00000017419	ENSRNOG00000002823	ENSRNOG00000034016	ENSRNOG00000010602	ENSRNOG00000053288	ENSRNOG00000016280	ENSRNOG00000026293	ENSRNOG00000005731	ENSRNOG00000058053	ENSRNOG00000023258	ENSRNOG00000001047	ENSRNOG00000006612	ENSRNOG00000060869	ENSRNOG00000042523	ENSRNOG00000047516	ENSRNOG00000049132	ENSRNOG00000031233	ENSRNOG00000054437	ENSRNOG00000019073	ENSRNOG00000025580	ENSRNOG00000013741	ENSRNOG00000007390	ENSRNOG00000000611	ENSRNOG00000005724	ENSRNOG00000001597	ENSRNOG00000001829
Yersinia infection	ENSRNOG00000017285	ENSRNOG00000004861	ENSRNOG00000002079	ENSRNOG00000000513	ENSRNOG00000000515	ENSRNOG00000000837	ENSRNOG00000001068	ENSRNOG00000015232	ENSRNOG00000049342	ENSRNOG00000014312	ENSRNOG00000046089	ENSRNOG00000049830	ENSRNOG00000047797	ENSRNOG00000007372	ENSRNOG00000049773	ENSRNOG00000003170	ENSRNOG00000046292	ENSRNOG00000030888	ENSRNOG00000009705	ENSRNOG00000009241	ENSRNOG00000021497	ENSRNOG00000006268	ENSRNOG00000004959	ENSRNOG00000033801	ENSRNOG00000046646	ENSRNOG00000048670	ENSRNOG00000048172	ENSRNOG00000051843	ENSRNOG00000016846	ENSRNOG00000012175	ENSRNOG00000010278	ENSRNOG00000048203	ENSRNOG00000054269	ENSRNOG00000054267	ENSRNOG00000053359	ENSRNOG00000003834	ENSRNOG00000042119	ENSRNOG00000048115	ENSRNOG00000006984	ENSRNOG00000001470	ENSRNOG00000004437	ENSRNOG00000049928	ENSRNOG00000061828	ENSRNOG00000007350	ENSRNOG00000016054	ENSRNOG00000046976	ENSRNOG00000009848	ENSRNOG00000009495	ENSRNOG00000058237
Shigellosis	ENSRNOG00000017285	ENSRNOG00000008258	ENSRNOG00000052795	ENSRNOG00000047356	ENSRNOG00000043182	ENSRNOG00000002079	ENSRNOG00000000513	ENSRNOG00000000515	ENSRNOG00000001010	ENSRNOG00000014289	ENSRNOG00000005310	ENSRNOG00000000299	ENSRNOG00000028062	ENSRNOG00000002791	ENSRNOG00000000837	ENSRNOG00000010906	ENSRNOG00000001068	ENSRNOG00000033316	ENSRNOG00000007051	ENSRNOG00000020027	ENSRNOG00000000991	ENSRNOG00000047280	ENSRNOG00000000996	ENSRNOG00000020513	ENSRNOG00000013798	ENSRNOG00000007372	ENSRNOG00000003170	ENSRNOG00000016346	ENSRNOG00000038076	ENSRNOG00000030888	ENSRNOG00000046144	ENSRNOG00000021497	ENSRNOG00000006268	ENSRNOG00000005810	ENSRNOG00000020063	ENSRNOG00000060366	ENSRNOG00000048194	ENSRNOG00000028975	ENSRNOG00000003919	ENSRNOG00000016846	ENSRNOG00000026805	ENSRNOG00000054539	ENSRNOG00000002182	ENSRNOG00000017840	ENSRNOG00000006532	ENSRNOG00000003821	ENSRNOG00000004362	ENSRNOG00000031680	ENSRNOG00000006984
Histidine metabolism	ENSRNOG00000020623	ENSRNOG00000019659	ENSRNOG00000032432	ENSRNOG00000018603	ENSRNOG00000015591	ENSRNOG00000017872	ENSRNOG00000001344	ENSRNOG00000002342	ENSRNOG00000011497	ENSRNOG00000008575	ENSRNOG00000005266	ENSRNOG00000029778	ENSRNOG00000012872	ENSRNOG00000004502	ENSRNOG00000001261	ENSRNOG00000002848	ENSRNOG00000052070	ENSRNOG00000023612	ENSRNOG00000005223	ENSRNOG00000027739	ENSRNOG00000004027	ENSRNOG00000017512	ENSRNOG00000010262	ENSRNOG00000008714	ENSRNOG00000014645	ENSRNOG00000002331	ENSRNOG00000043404
Tight junction	ENSRNOG00000054495	ENSRNOG00000010085	ENSRNOG00000002079	ENSRNOG00000002767	ENSRNOG00000001068	ENSRNOG00000020027	ENSRNOG00000047280	ENSRNOG00000030118	ENSRNOG00000008990	ENSRNOG00000002886	ENSRNOG00000028837	ENSRNOG00000010486	ENSRNOG00000009149	ENSRNOG00000045811	ENSRNOG00000046007	ENSRNOG00000047322	ENSRNOG00000004959	ENSRNOG00000003232	ENSRNOG00000005389	ENSRNOG00000003648	ENSRNOG00000021581	ENSRNOG00000001571	ENSRNOG00000028090	ENSRNOG00000020952	ENSRNOG00000018009	ENSRNOG00000019181	ENSRNOG00000013177	ENSRNOG00000015603	ENSRNOG00000015733	ENSRNOG00000001142	ENSRNOG00000009495	ENSRNOG00000009995	ENSRNOG00000011424	ENSRNOG00000001691	ENSRNOG00000007706	ENSRNOG00000032574	ENSRNOG00000055103	ENSRNOG00000013536	ENSRNOG00000048169	ENSRNOG00000023753	ENSRNOG00000004496	ENSRNOG00000018851	ENSRNOG00000013836	ENSRNOG00000054080	ENSRNOG00000013147	ENSRNOG00000033736	ENSRNOG00000011158	ENSRNOG00000032437	ENSRNOG00000006450
Cytosolic DNA-sensing pathway	ENSRNOG00000016260	ENSRNOG00000010906	ENSRNOG00000011406	ENSRNOG00000013545	ENSRNOG00000048562	ENSRNOG00000007372	ENSRNOG00000030888	ENSRNOG00000052145	ENSRNOG00000006268	ENSRNOG00000020063	ENSRNOG00000010278	ENSRNOG00000033560	ENSRNOG00000049116	ENSRNOG00000009848	ENSRNOG00000006314	ENSRNOG00000020465	ENSRNOG00000007548	ENSRNOG00000042137	ENSRNOG00000022485	ENSRNOG00000046191	ENSRNOG00000004471	ENSRNOG00000058365	ENSRNOG00000019079	ENSRNOG00000019293	ENSRNOG00000022256	ENSRNOG00000001748	ENSRNOG00000007432	ENSRNOG00000003480	ENSRNOG00000005528	ENSRNOG00000042840	ENSRNOG00000010028	ENSRNOG00000019675	ENSRNOG00000006384	ENSRNOG00000059274	ENSRNOG00000023258	ENSRNOG00000025100	ENSRNOG00000020744	ENSRNOG00000017843	ENSRNOG00000033602	ENSRNOG00000010408	ENSRNOG00000060936	ENSRNOG00000023805	ENSRNOG00000004649	ENSRNOG00000058501	ENSRNOG00000017414	ENSRNOG00000022540	ENSRNOG00000031046	ENSRNOG00000016960	ENSRNOG00000019073
p53 signaling pathway	ENSRNOG00000002791	ENSRNOG00000042492	ENSRNOG00000015143	ENSRNOG00000008173	ENSRNOG00000012944	ENSRNOG00000025454	ENSRNOG00000061910	ENSRNOG00000012439	ENSRNOG00000058539	ENSRNOG00000008022	ENSRNOG00000003256	ENSRNOG00000019142	ENSRNOG00000013090	ENSRNOG00000012331	ENSRNOG00000020876	ENSRNOG00000037509	ENSRNOG00000025602	ENSRNOG00000010027	ENSRNOG00000042785	ENSRNOG00000011994	ENSRNOG00000057710	ENSRNOG00000020667	ENSRNOG00000014071	ENSRNOG00000033559	ENSRNOG00000008055	ENSRNOG00000009696	ENSRNOG00000006304	ENSRNOG00000049179	ENSRNOG00000005109	ENSRNOG00000045829	ENSRNOG00000007946	ENSRNOG00000019822	ENSRNOG00000008450	ENSRNOG00000033924	ENSRNOG00000059837	ENSRNOG00000054286	ENSRNOG00000020918	ENSRNOG00000032885	ENSRNOG00000059445	ENSRNOG00000046657	ENSRNOG00000009258	ENSRNOG00000002640	ENSRNOG00000018770	ENSRNOG00000010119	ENSRNOG00000011375	ENSRNOG00000001414	ENSRNOG00000030665	ENSRNOG00000005615	ENSRNOG00000030391
Cell adhesion molecules (CAMs)	ENSRNOG00000054495	ENSRNOG00000010085	ENSRNOG00000004861	ENSRNOG00000049590	ENSRNOG00000032576	ENSRNOG00000029798	ENSRNOG00000000763	ENSRNOG00000050220	ENSRNOG00000026669	ENSRNOG00000026762	ENSRNOG00000047854	ENSRNOG00000049491	ENSRNOG00000048951	ENSRNOG00000031090	ENSRNOG00000000454	ENSRNOG00000050998	ENSRNOG00000000723	ENSRNOG00000050183	ENSRNOG00000039744	ENSRNOG00000032708	ENSRNOG00000031607	ENSRNOG00000061639	ENSRNOG00000000451	ENSRNOG00000003812	ENSRNOG00000033215	ENSRNOG00000047574	ENSRNOG00000015430	ENSRNOG00000036711	ENSRNOG00000002723	ENSRNOG00000002794	ENSRNOG00000030431	ENSRNOG00000032844	ENSRNOG00000029001	ENSRNOG00000029386	ENSRNOG00000054129	ENSRNOG00000028414	ENSRNOG00000039282	ENSRNOG00000054170	ENSRNOG00000056574	ENSRNOG00000036826	ENSRNOG00000045924	ENSRNOG00000000795	ENSRNOG00000042905	ENSRNOG00000032596	ENSRNOG00000000787	ENSRNOG00000000777	ENSRNOG00000033136	ENSRNOG00000060412	ENSRNOG00000040052
Chronic myeloid leukemia	ENSRNOG00000000485	ENSRNOG00000047356	ENSRNOG00000029273	ENSRNOG00000004500	ENSRNOG00000030888	ENSRNOG00000021497	ENSRNOG00000009338	ENSRNOG00000016846	ENSRNOG00000019496	ENSRNOG00000016029	ENSRNOG00000005428	ENSRNOG00000023079	ENSRNOG00000018677	ENSRNOG00000047741	ENSRNOG00000025792	ENSRNOG00000001868	ENSRNOG00000011882	ENSRNOG00000007036	ENSRNOG00000013090	ENSRNOG00000020657	ENSRNOG00000000145	ENSRNOG00000019075	ENSRNOG00000022485	ENSRNOG00000011640	ENSRNOG00000000604	ENSRNOG00000004826	ENSRNOG00000056810	ENSRNOG00000010957	ENSRNOG00000020876	ENSRNOG00000023622	ENSRNOG00000025602	ENSRNOG00000008030	ENSRNOG00000056371	ENSRNOG00000001849	ENSRNOG00000020652	ENSRNOG00000037360	ENSRNOG00000008620	ENSRNOG00000016384	ENSRNOG00000014071	ENSRNOG00000009371	ENSRNOG00000018903	ENSRNOG00000006304	ENSRNOG00000060626	ENSRNOG00000020005	ENSRNOG00000016611	ENSRNOG00000007946	ENSRNOG00000019822	ENSRNOG00000010153	ENSRNOG00000010838
Axon regeneration	ENSRNOG00000029598	ENSRNOG00000002079	ENSRNOG00000000513	ENSRNOG00000002338	ENSRNOG00000000515	ENSRNOG00000029986	ENSRNOG00000000299	ENSRNOG00000049768	ENSRNOG00000001068	ENSRNOG00000001235	ENSRNOG00000010479	ENSRNOG00000039323	ENSRNOG00000018827	ENSRNOG00000045949	ENSRNOG00000013884	ENSRNOG00000016346	ENSRNOG00000010789	ENSRNOG00000003919	ENSRNOG00000003947	ENSRNOG00000016846	ENSRNOG00000003840	ENSRNOG00000009110	ENSRNOG00000003834	ENSRNOG00000055915	ENSRNOG00000019100	ENSRNOG00000052745	ENSRNOG00000006984	ENSRNOG00000004810	ENSRNOG00000030771	ENSRNOG00000007706	ENSRNOG00000021150	ENSRNOG00000013862	ENSRNOG00000058337	ENSRNOG00000003880	ENSRNOG00000014476	ENSRNOG00000013147	ENSRNOG00000029394	ENSRNOG00000020155	ENSRNOG00000042954	ENSRNOG00000001796	ENSRNOG00000056810	ENSRNOG00000004936	ENSRNOG00000002535	ENSRNOG00000014061	ENSRNOG00000023622	ENSRNOG00000056371	ENSRNOG00000025889	ENSRNOG00000012735	ENSRNOG00000050519
Cysteine and methionine metabolism	ENSRNOG00000038473	ENSRNOG00000013009	ENSRNOG00000043116	ENSRNOG00000018569	ENSRNOG00000013409	ENSRNOG00000001391	ENSRNOG00000001388	ENSRNOG00000017821	ENSRNOG00000000185	ENSRNOG00000011200	ENSRNOG00000010625	ENSRNOG00000000186	ENSRNOG00000020956	ENSRNOG00000006615	ENSRNOG00000013971	ENSRNOG00000013000	ENSRNOG00000002262	ENSRNOG00000008950	ENSRNOG00000001440	ENSRNOG00000007446	ENSRNOG00000046379	ENSRNOG00000000158	ENSRNOG00000040120	ENSRNOG00000006302	ENSRNOG00000043426	ENSRNOG00000020148	ENSRNOG00000039300	ENSRNOG00000039859	ENSRNOG00000015514	ENSRNOG00000013103	ENSRNOG00000000585	ENSRNOG00000029528	ENSRNOG00000017777	ENSRNOG00000057089	ENSRNOG00000026649	ENSRNOG00000016356	ENSRNOG00000008103	ENSRNOG00000018964	ENSRNOG00000011351	ENSRNOG00000007232	ENSRNOG00000003177	ENSRNOG00000016348	ENSRNOG00000011782	ENSRNOG00000019328	ENSRNOG00000016097	ENSRNOG00000007688	ENSRNOG00000017593	ENSRNOG00000013520	ENSRNOG00000010658
Pentose phosphate pathway	ENSRNOG00000038085	ENSRNOG00000002185	ENSRNOG00000023150	ENSRNOG00000052455	ENSRNOG00000016064	ENSRNOG00000007949	ENSRNOG00000017597	ENSRNOG00000058719	ENSRNOG00000007570	ENSRNOG00000017637	ENSRNOG00000060262	ENSRNOG00000018326	ENSRNOG00000009889	ENSRNOG00000056728	ENSRNOG00000052802	ENSRNOG00000055557	ENSRNOG00000001214	ENSRNOG00000005576	ENSRNOG00000017523	ENSRNOG00000006807	ENSRNOG00000018367	ENSRNOG00000030869	ENSRNOG00000056011	ENSRNOG00000057988	ENSRNOG00000004710	ENSRNOG00000046307	ENSRNOG00000019519	ENSRNOG00000004160	ENSRNOG00000017163	ENSRNOG00000032513	ENSRNOG00000011452	ENSRNOG00000014185
Cellular senescence	ENSRNOG00000039980	ENSRNOG00000052795	ENSRNOG00000049590	ENSRNOG00000000513	ENSRNOG00000000515	ENSRNOG00000043210	ENSRNOG00000000763	ENSRNOG00000000299	ENSRNOG00000029273	ENSRNOG00000038398	ENSRNOG00000048951	ENSRNOG00000031090	ENSRNOG00000050998	ENSRNOG00000000723	ENSRNOG00000050183	ENSRNOG00000039744	ENSRNOG00000031607	ENSRNOG00000061639	ENSRNOG00000012582	ENSRNOG00000029001	ENSRNOG00000029386	ENSRNOG00000045924	ENSRNOG00000000795	ENSRNOG00000042905	ENSRNOG00000032596	ENSRNOG00000000787	ENSRNOG00000000777	ENSRNOG00000004500	ENSRNOG00000033136	ENSRNOG00000060412	ENSRNOG00000040052	ENSRNOG00000022107	ENSRNOG00000059770	ENSRNOG00000047706	ENSRNOG00000030712	ENSRNOG00000038999	ENSRNOG00000004060	ENSRNOG00000011470	ENSRNOG00000018729	ENSRNOG00000010830	ENSRNOG00000030888	ENSRNOG00000002203	ENSRNOG00000021497	ENSRNOG00000009338	ENSRNOG00000016770	ENSRNOG00000061910	ENSRNOG00000016846	ENSRNOG00000007034	ENSRNOG00000012175
Apoptosis - fly	ENSRNOG00000017801	ENSRNOG00000002079	ENSRNOG00000003084	ENSRNOG00000022448	ENSRNOG00000056216	ENSRNOG00000010549	ENSRNOG00000009338	ENSRNOG00000001813	ENSRNOG00000010218	ENSRNOG00000008022	ENSRNOG00000016054	ENSRNOG00000011278	ENSRNOG00000056343	ENSRNOG00000012331	ENSRNOG00000020155	ENSRNOG00000010957	ENSRNOG00000010027	ENSRNOG00000001849	ENSRNOG00000002823	ENSRNOG00000005352	ENSRNOG00000013169	ENSRNOG00000018214	ENSRNOG00000033559	ENSRNOG00000003763	ENSRNOG00000004093	ENSRNOG00000026293	ENSRNOG00000006067	ENSRNOG00000046424	ENSRNOG00000001924	ENSRNOG00000013774	ENSRNOG00000033924	ENSRNOG00000050521	ENSRNOG00000032885	ENSRNOG00000010815	ENSRNOG00000001047	ENSRNOG00000004332	ENSRNOG00000025742	ENSRNOG00000027191	ENSRNOG00000029773	ENSRNOG00000003520	ENSRNOG00000047516	ENSRNOG00000005264	ENSRNOG00000010452	ENSRNOG00000004639	ENSRNOG00000014916	ENSRNOG00000053583	ENSRNOG00000006069	ENSRNOG00000031700	ENSRNOG00000011762
Pyruvate metabolism	ENSRNOG00000013975	ENSRNOG00000020623	ENSRNOG00000012794	ENSRNOG00000013009	ENSRNOG00000034013	ENSRNOG00000001344	ENSRNOG00000000541	ENSRNOG00000009994	ENSRNOG00000000658	ENSRNOG00000002342	ENSRNOG00000011497	ENSRNOG00000047276	ENSRNOG00000013000	ENSRNOG00000011329	ENSRNOG00000019036	ENSRNOG00000007102	ENSRNOG00000001440	ENSRNOG00000017311	ENSRNOG00000028616	ENSRNOG00000006744	ENSRNOG00000020420	ENSRNOG00000016223	ENSRNOG00000014745	ENSRNOG00000019372	ENSRNOG00000018536	ENSRNOG00000014743	ENSRNOG00000013103	ENSRNOG00000018755	ENSRNOG00000003653	ENSRNOG00000008103	ENSRNOG00000061414	ENSRNOG00000025383	ENSRNOG00000004027	ENSRNOG00000007895	ENSRNOG00000006364	ENSRNOG00000009715	ENSRNOG00000019189	ENSRNOG00000042419	ENSRNOG00000014645	ENSRNOG00000015582	ENSRNOG00000007862
Basal transcription factors	ENSRNOG00000001479	ENSRNOG00000058393	ENSRNOG00000004300	ENSRNOG00000000831	ENSRNOG00000051258	ENSRNOG00000061102	ENSRNOG00000018230	ENSRNOG00000007267	ENSRNOG00000011135	ENSRNOG00000048288	ENSRNOG00000011234	ENSRNOG00000001478	ENSRNOG00000019178	ENSRNOG00000026315	ENSRNOG00000001355	ENSRNOG00000018510	ENSRNOG00000014422	ENSRNOG00000052193	ENSRNOG00000022632	ENSRNOG00000026008	ENSRNOG00000056701	ENSRNOG00000019419	ENSRNOG00000013180	ENSRNOG00000015249	ENSRNOG00000031656	ENSRNOG00000001489	ENSRNOG00000047134	ENSRNOG00000016703	ENSRNOG00000001035	ENSRNOG00000026023	ENSRNOG00000018007	ENSRNOG00000024601	ENSRNOG00000020315	ENSRNOG00000029316	ENSRNOG00000020024	ENSRNOG00000018027	ENSRNOG00000034022	ENSRNOG00000020274	ENSRNOG00000054497	ENSRNOG00000011114	ENSRNOG00000050193	ENSRNOG00000019223	ENSRNOG00000012360	ENSRNOG00000017753	ENSRNOG00000033682
Glycosphingolipid biosynthesis - ganglio series	ENSRNOG00000010023	ENSRNOG00000008209	ENSRNOG00000056894	ENSRNOG00000000471	ENSRNOG00000004839	ENSRNOG00000049676	ENSRNOG00000046984	ENSRNOG00000060973	ENSRNOG00000010196	ENSRNOG00000014018	ENSRNOG00000048870	ENSRNOG00000010284	ENSRNOG00000017932	ENSRNOG00000022691	ENSRNOG00000010252	ENSRNOG00000025274
Toxoplasmosis	ENSRNOG00000017285	ENSRNOG00000002079	ENSRNOG00000000513	ENSRNOG00000000515	ENSRNOG00000026669	ENSRNOG00000026762	ENSRNOG00000047854	ENSRNOG00000049491	ENSRNOG00000002791	ENSRNOG00000011300	ENSRNOG00000045654	ENSRNOG00000000454	ENSRNOG00000000837	ENSRNOG00000047966	ENSRNOG00000050647	ENSRNOG00000032708	ENSRNOG00000000451	ENSRNOG00000002667	ENSRNOG00000002680	ENSRNOG00000033215	ENSRNOG00000030431	ENSRNOG00000032844	ENSRNOG00000049115	ENSRNOG00000051002	ENSRNOG00000047864	ENSRNOG00000030888	ENSRNOG00000012944	ENSRNOG00000018488	ENSRNOG00000021497	ENSRNOG00000032368	ENSRNOG00000020063	ENSRNOG00000019742	ENSRNOG00000006984	ENSRNOG00000004437	ENSRNOG00000059968	ENSRNOG00000016054	ENSRNOG00000019465	ENSRNOG00000018677	ENSRNOG00000061099	ENSRNOG00000007468	ENSRNOG00000053691	ENSRNOG00000022485	ENSRNOG00000005965	ENSRNOG00000012331	ENSRNOG00000027008	ENSRNOG00000004647	ENSRNOG00000020155	ENSRNOG00000023428	ENSRNOG00000013634
Acute myeloid leukemia	ENSRNOG00000002227	ENSRNOG00000012582	ENSRNOG00000004500	ENSRNOG00000030888	ENSRNOG00000014753	ENSRNOG00000015380	ENSRNOG00000021497	ENSRNOG00000003919	ENSRNOG00000009338	ENSRNOG00000016846	ENSRNOG00000019496	ENSRNOG00000019742	ENSRNOG00000026805	ENSRNOG00000000503	ENSRNOG00000008310	ENSRNOG00000023079	ENSRNOG00000026786	ENSRNOG00000018677	ENSRNOG00000013993	ENSRNOG00000054764	ENSRNOG00000000145	ENSRNOG00000019075	ENSRNOG00000022485	ENSRNOG00000004826	ENSRNOG00000056810	ENSRNOG00000021199	ENSRNOG00000010957	ENSRNOG00000047606	ENSRNOG00000023622	ENSRNOG00000056371	ENSRNOG00000001849	ENSRNOG00000037360	ENSRNOG00000016384	ENSRNOG00000009972	ENSRNOG00000005872	ENSRNOG00000049232	ENSRNOG00000018903	ENSRNOG00000000529	ENSRNOG00000018414	ENSRNOG00000020005	ENSRNOG00000016611	ENSRNOG00000010153	ENSRNOG00000017819	ENSRNOG00000010838	ENSRNOG00000008400	ENSRNOG00000020918	ENSRNOG00000007106	ENSRNOG00000023258	ENSRNOG00000014282
FoxO signaling pathway	ENSRNOG00000002079	ENSRNOG00000000513	ENSRNOG00000000515	ENSRNOG00000029986	ENSRNOG00000051964	ENSRNOG00000000299	ENSRNOG00000002978	ENSRNOG00000011654	ENSRNOG00000033316	ENSRNOG00000051171	ENSRNOG00000005370	ENSRNOG00000021497	ENSRNOG00000009338	ENSRNOG00000016846	ENSRNOG00000019742	ENSRNOG00000010278	ENSRNOG00000006984	ENSRNOG00000058539	ENSRNOG00000023079	ENSRNOG00000042464	ENSRNOG00000001142	ENSRNOG00000012153	ENSRNOG00000018677	ENSRNOG00000007706	ENSRNOG00000000157	ENSRNOG00000011951	ENSRNOG00000007036	ENSRNOG00000014290	ENSRNOG00000051592	ENSRNOG00000013090	ENSRNOG00000000145	ENSRNOG00000022485	ENSRNOG00000033345	ENSRNOG00000025496	ENSRNOG00000004647	ENSRNOG00000013076	ENSRNOG00000020155	ENSRNOG00000004826	ENSRNOG00000056810	ENSRNOG00000014287	ENSRNOG00000001843	ENSRNOG00000019048	ENSRNOG00000010957	ENSRNOG00000002951	ENSRNOG00000023622	ENSRNOG00000000190	ENSRNOG00000017226	ENSRNOG00000056371	ENSRNOG00000001849
Small cell lung cancer	ENSRNOG00000000485	ENSRNOG00000000464	ENSRNOG00000048914	ENSRNOG00000029273	ENSRNOG00000002791	ENSRNOG00000011300	ENSRNOG00000010436	ENSRNOG00000002667	ENSRNOG00000002680	ENSRNOG00000014851	ENSRNOG00000004500	ENSRNOG00000024061	ENSRNOG00000002525	ENSRNOG00000030888	ENSRNOG00000012944	ENSRNOG00000021497	ENSRNOG00000016846	ENSRNOG00000042804	ENSRNOG00000016029	ENSRNOG00000008022	ENSRNOG00000018951	ENSRNOG00000018677	ENSRNOG00000047741	ENSRNOG00000008145	ENSRNOG00000022071	ENSRNOG00000013090	ENSRNOG00000053691	ENSRNOG00000000145	ENSRNOG00000042561	ENSRNOG00000022485	ENSRNOG00000056810	ENSRNOG00000020876	ENSRNOG00000059507	ENSRNOG00000023622	ENSRNOG00000025602	ENSRNOG00000056371	ENSRNOG00000010966	ENSRNOG00000015365	ENSRNOG00000011134	ENSRNOG00000010602	ENSRNOG00000004276	ENSRNOG00000013169	ENSRNOG00000016384	ENSRNOG00000014071	ENSRNOG00000000599	ENSRNOG00000033559	ENSRNOG00000018903	ENSRNOG00000008055	ENSRNOG00000059059
Ubiquitin mediated proteolysis	ENSRNOG00000017536	ENSRNOG00000039985	ENSRNOG00000010702	ENSRNOG00000019649	ENSRNOG00000005310	ENSRNOG00000051063	ENSRNOG00000010303	ENSRNOG00000052326	ENSRNOG00000007434	ENSRNOG00000010889	ENSRNOG00000010727	ENSRNOG00000015633	ENSRNOG00000017373	ENSRNOG00000012937	ENSRNOG00000016963	ENSRNOG00000000999	ENSRNOG00000028415	ENSRNOG00000042492	ENSRNOG00000032690	ENSRNOG00000050465	ENSRNOG00000027514	ENSRNOG00000015143	ENSRNOG00000006328	ENSRNOG00000051671	ENSRNOG00000005904	ENSRNOG00000061040	ENSRNOG00000001982	ENSRNOG00000026286	ENSRNOG00000026900	ENSRNOG00000017857	ENSRNOG00000054620	ENSRNOG00000048205	ENSRNOG00000029785	ENSRNOG00000009968	ENSRNOG00000004169	ENSRNOG00000013177	ENSRNOG00000017907	ENSRNOG00000011295	ENSRNOG00000002946	ENSRNOG00000034075	ENSRNOG00000010041	ENSRNOG00000004814	ENSRNOG00000054698	ENSRNOG00000001213	ENSRNOG00000014529	ENSRNOG00000015734	ENSRNOG00000008039	ENSRNOG00000021230	ENSRNOG00000015128
Inflammatory mediator regulation of TRP channels	ENSRNOG00000052795	ENSRNOG00000002079	ENSRNOG00000000513	ENSRNOG00000000515	ENSRNOG00000013953	ENSRNOG00000049768	ENSRNOG00000019486	ENSRNOG00000019606	ENSRNOG00000024016	ENSRNOG00000049464	ENSRNOG00000004060	ENSRNOG00000030466	ENSRNOG00000016346	ENSRNOG00000009783	ENSRNOG00000004890	ENSRNOG00000016770	ENSRNOG00000016846	ENSRNOG00000001466	ENSRNOG00000047300	ENSRNOG00000018708	ENSRNOG00000013240	ENSRNOG00000006984	ENSRNOG00000004437	ENSRNOG00000004810	ENSRNOG00000015603	ENSRNOG00000011589	ENSRNOG00000009495	ENSRNOG00000013291	ENSRNOG00000021150	ENSRNOG00000058337	ENSRNOG00000026764	ENSRNOG00000000145	ENSRNOG00000009597	ENSRNOG00000051986	ENSRNOG00000020155	ENSRNOG00000056810	ENSRNOG00000019985	ENSRNOG00000052810	ENSRNOG00000037231	ENSRNOG00000046080	ENSRNOG00000021405	ENSRNOG00000007354	ENSRNOG00000023622	ENSRNOG00000056371	ENSRNOG00000025889	ENSRNOG00000002823	ENSRNOG00000017625	ENSRNOG00000020401	ENSRNOG00000019035
Retinol metabolism	ENSRNOG00000003030	ENSRNOG00000001980	ENSRNOG00000046540	ENSRNOG00000001990	ENSRNOG00000000969	ENSRNOG00000015354	ENSRNOG00000062125	ENSRNOG00000014555	ENSRNOG00000024016	ENSRNOG00000049464	ENSRNOG00000031529	ENSRNOG00000029651	ENSRNOG00000046643	ENSRNOG00000015076	ENSRNOG00000002597	ENSRNOG00000001466	ENSRNOG00000004391	ENSRNOG00000013291	ENSRNOG00000033680	ENSRNOG00000006681	ENSRNOG00000032560	ENSRNOG00000020775	ENSRNOG00000009597	ENSRNOG00000054770	ENSRNOG00000017878	ENSRNOG00000014090	ENSRNOG00000009582	ENSRNOG00000052810	ENSRNOG00000040151	ENSRNOG00000046080	ENSRNOG00000053850	ENSRNOG00000021405	ENSRNOG00000020817	ENSRNOG00000016173	ENSRNOG00000055049	ENSRNOG00000033923	ENSRNOG00000020801	ENSRNOG00000001973	ENSRNOG00000021924	ENSRNOG00000008842	ENSRNOG00000042714	ENSRNOG00000001379	ENSRNOG00000017619	ENSRNOG00000008871	ENSRNOG00000046357	ENSRNOG00000007758	ENSRNOG00000020743	ENSRNOG00000013241	ENSRNOG00000026157
Influenza A	ENSRNOG00000000485	ENSRNOG00000039980	ENSRNOG00000010352	ENSRNOG00000026669	ENSRNOG00000026762	ENSRNOG00000047854	ENSRNOG00000002978	ENSRNOG00000049491	ENSRNOG00000038398	ENSRNOG00000000454	ENSRNOG00000000837	ENSRNOG00000032708	ENSRNOG00000010906	ENSRNOG00000038483	ENSRNOG00000000451	ENSRNOG00000033215	ENSRNOG00000030431	ENSRNOG00000032844	ENSRNOG00000000985	ENSRNOG00000042296	ENSRNOG00000047035	ENSRNOG00000051002	ENSRNOG00000047864	ENSRNOG00000045612	ENSRNOG00000021726	ENSRNOG00000011302	ENSRNOG00000007372	ENSRNOG00000003170	ENSRNOG00000010830	ENSRNOG00000030888	ENSRNOG00000012944	ENSRNOG00000052145	ENSRNOG00000021497	ENSRNOG00000006268	ENSRNOG00000020063	ENSRNOG00000016846	ENSRNOG00000012439	ENSRNOG00000010278	ENSRNOG00000030058	ENSRNOG00000020683	ENSRNOG00000004575	ENSRNOG00000050119	ENSRNOG00000059968	ENSRNOG00000001369	ENSRNOG00000008022	ENSRNOG00000047076	ENSRNOG00000009848	ENSRNOG00000002946	ENSRNOG00000018677
Apoptosis	ENSRNOG00000017801	ENSRNOG00000000485	ENSRNOG00000052795	ENSRNOG00000002079	ENSRNOG00000009508	ENSRNOG00000051196	ENSRNOG00000013953	ENSRNOG00000002978	ENSRNOG00000048914	ENSRNOG00000002791	ENSRNOG00000000837	ENSRNOG00000038483	ENSRNOG00000019638	ENSRNOG00000047035	ENSRNOG00000007367	ENSRNOG00000000477	ENSRNOG00000054519	ENSRNOG00000002061	ENSRNOG00000030888	ENSRNOG00000003084	ENSRNOG00000012944	ENSRNOG00000022448	ENSRNOG00000010331	ENSRNOG00000021497	ENSRNOG00000056216	ENSRNOG00000009338	ENSRNOG00000016846	ENSRNOG00000012439	ENSRNOG00000021155	ENSRNOG00000003537	ENSRNOG00000031618	ENSRNOG00000008022	ENSRNOG00000012864	ENSRNOG00000023079	ENSRNOG00000049504	ENSRNOG00000059133	ENSRNOG00000026786	ENSRNOG00000018677	ENSRNOG00000005861	ENSRNOG00000047294	ENSRNOG00000019142	ENSRNOG00000056033	ENSRNOG00000048169	ENSRNOG00000029197	ENSRNOG00000055015	ENSRNOG00000025030	ENSRNOG00000013090	ENSRNOG00000000145	ENSRNOG00000022485
Oocyte meiosis	ENSRNOG00000017536	ENSRNOG00000052795	ENSRNOG00000000513	ENSRNOG00000000515	ENSRNOG00000043210	ENSRNOG00000005310	ENSRNOG00000049768	ENSRNOG00000009134	ENSRNOG00000024077	ENSRNOG00000028415	ENSRNOG00000005639	ENSRNOG00000004060	ENSRNOG00000024008	ENSRNOG00000009783	ENSRNOG00000005904	ENSRNOG00000004479	ENSRNOG00000004890	ENSRNOG00000005376	ENSRNOG00000005389	ENSRNOG00000016770	ENSRNOG00000029785	ENSRNOG00000018708	ENSRNOG00000006984	ENSRNOG00000058539	ENSRNOG00000004534	ENSRNOG00000011589	ENSRNOG00000011295	ENSRNOG00000010945	ENSRNOG00000032778	ENSRNOG00000008567	ENSRNOG00000004395	ENSRNOG00000008195	ENSRNOG00000012835	ENSRNOG00000016965	ENSRNOG00000043425	ENSRNOG00000018296	ENSRNOG00000009745	ENSRNOG00000003657	ENSRNOG00000001849	ENSRNOG00000001265	ENSRNOG00000006831	ENSRNOG00000011282	ENSRNOG00000020401	ENSRNOG00000052080	ENSRNOG00000014776	ENSRNOG00000001436	ENSRNOG00000004130	ENSRNOG00000033169	ENSRNOG00000016280
Lysine degradation	ENSRNOG00000013975	ENSRNOG00000000729	ENSRNOG00000061080	ENSRNOG00000030630	ENSRNOG00000020623	ENSRNOG00000021614	ENSRNOG00000023587	ENSRNOG00000050970	ENSRNOG00000006048	ENSRNOG00000001337	ENSRNOG00000006776	ENSRNOG00000001417	ENSRNOG00000013419	ENSRNOG00000015133	ENSRNOG00000039494	ENSRNOG00000055525	ENSRNOG00000011861	ENSRNOG00000021680	ENSRNOG00000047933	ENSRNOG00000030629	ENSRNOG00000001344	ENSRNOG00000055028	ENSRNOG00000004108	ENSRNOG00000002342	ENSRNOG00000011497	ENSRNOG00000020336	ENSRNOG00000020915	ENSRNOG00000016680	ENSRNOG00000033522	ENSRNOG00000039576	ENSRNOG00000010697	ENSRNOG00000053891	ENSRNOG00000020386	ENSRNOG00000005061	ENSRNOG00000028207	ENSRNOG00000003583	ENSRNOG00000006806	ENSRNOG00000016790	ENSRNOG00000001770	ENSRNOG00000060905	ENSRNOG00000007242	ENSRNOG00000053915	ENSRNOG00000015585	ENSRNOG00000003307	ENSRNOG00000024629	ENSRNOG00000059519	ENSRNOG00000023317	ENSRNOG00000007763	ENSRNOG00000001062
Sphingolipid signaling pathway	ENSRNOG00000002079	ENSRNOG00000000513	ENSRNOG00000000515	ENSRNOG00000000596	ENSRNOG00000062030	ENSRNOG00000005175	ENSRNOG00000002791	ENSRNOG00000000837	ENSRNOG00000001068	ENSRNOG00000001235	ENSRNOG00000015788	ENSRNOG00000050743	ENSRNOG00000043375	ENSRNOG00000003442	ENSRNOG00000003223	ENSRNOG00000030888	ENSRNOG00000037695	ENSRNOG00000005370	ENSRNOG00000021497	ENSRNOG00000005389	ENSRNOG00000048172	ENSRNOG00000009338	ENSRNOG00000016846	ENSRNOG00000012439	ENSRNOG00000047300	ENSRNOG00000012536	ENSRNOG00000006984	ENSRNOG00000004810	ENSRNOG00000020993	ENSRNOG00000015603	ENSRNOG00000007350	ENSRNOG00000057978	ENSRNOG00000023079	ENSRNOG00000019465	ENSRNOG00000018677	ENSRNOG00000001072	ENSRNOG00000011882	ENSRNOG00000021150	ENSRNOG00000058337	ENSRNOG00000004496	ENSRNOG00000018851	ENSRNOG00000000145	ENSRNOG00000011158	ENSRNOG00000012196	ENSRNOG00000011284	ENSRNOG00000020155	ENSRNOG00000042954	ENSRNOG00000056810	ENSRNOG00000020901
C-type lectin receptor signaling pathway	ENSRNOG00000052795	ENSRNOG00000002079	ENSRNOG00000000513	ENSRNOG00000000515	ENSRNOG00000043210	ENSRNOG00000051120	ENSRNOG00000000837	ENSRNOG00000017828	ENSRNOG00000004060	ENSRNOG00000002525	ENSRNOG00000020300	ENSRNOG00000007372	ENSRNOG00000003170	ENSRNOG00000016346	ENSRNOG00000030888	ENSRNOG00000012160	ENSRNOG00000001982	ENSRNOG00000021497	ENSRNOG00000008144	ENSRNOG00000009338	ENSRNOG00000016770	ENSRNOG00000016846	ENSRNOG00000001017	ENSRNOG00000012175	ENSRNOG00000010278	ENSRNOG00000051470	ENSRNOG00000003254	ENSRNOG00000057335	ENSRNOG00000029881	ENSRNOG00000006984	ENSRNOG00000042807	ENSRNOG00000023079	ENSRNOG00000009495	ENSRNOG00000018677	ENSRNOG00000001027	ENSRNOG00000043416	ENSRNOG00000000145	ENSRNOG00000022485	ENSRNOG00000051986	ENSRNOG00000012331	ENSRNOG00000004647	ENSRNOG00000020155	ENSRNOG00000042954	ENSRNOG00000031081	ENSRNOG00000017181	ENSRNOG00000012258	ENSRNOG00000056810	ENSRNOG00000014079	ENSRNOG00000023622
Antifolate resistance	ENSRNOG00000000837	ENSRNOG00000013521	ENSRNOG00000030888	ENSRNOG00000007041	ENSRNOG00000019902	ENSRNOG00000010278	ENSRNOG00000057978	ENSRNOG00000022485	ENSRNOG00000010291	ENSRNOG00000002948	ENSRNOG00000008106	ENSRNOG00000019074	ENSRNOG00000005275	ENSRNOG00000027037	ENSRNOG00000001232	ENSRNOG00000055156	ENSRNOG00000037225	ENSRNOG00000007351	ENSRNOG00000023258	ENSRNOG00000060936	ENSRNOG00000046727	ENSRNOG00000015511	ENSRNOG00000004649	ENSRNOG00000019894	ENSRNOG00000022305	ENSRNOG00000028292	ENSRNOG00000019073	ENSRNOG00000050780	ENSRNOG00000010064	ENSRNOG00000029178	ENSRNOG00000008553	ENSRNOG00000019890
Glycerolipid metabolism	ENSRNOG00000009513	ENSRNOG00000002338	ENSRNOG00000020623	ENSRNOG00000039323	ENSRNOG00000000437	ENSRNOG00000022268	ENSRNOG00000027433	ENSRNOG00000017731	ENSRNOG00000018077	ENSRNOG00000001205	ENSRNOG00000009734	ENSRNOG00000001344	ENSRNOG00000010406	ENSRNOG00000012181	ENSRNOG00000017725	ENSRNOG00000030771	ENSRNOG00000002342	ENSRNOG00000011497	ENSRNOG00000017908	ENSRNOG00000008116	ENSRNOG00000016727	ENSRNOG00000018694	ENSRNOG00000019466	ENSRNOG00000014876	ENSRNOG00000049161	ENSRNOG00000001796	ENSRNOG00000020424	ENSRNOG00000061050	ENSRNOG00000027228	ENSRNOG00000029397	ENSRNOG00000009875	ENSRNOG00000000177	ENSRNOG00000014508	ENSRNOG00000018736	ENSRNOG00000026705	ENSRNOG00000010065	ENSRNOG00000029096	ENSRNOG00000011513	ENSRNOG00000011509	ENSRNOG00000034116	ENSRNOG00000014692	ENSRNOG00000013906	ENSRNOG00000017737	ENSRNOG00000017982	ENSRNOG00000047551	ENSRNOG00000034026	ENSRNOG00000015568	ENSRNOG00000009980	ENSRNOG00000022943
Progesterone-mediated oocyte maturation	ENSRNOG00000017536	ENSRNOG00000002079	ENSRNOG00000000513	ENSRNOG00000000515	ENSRNOG00000049768	ENSRNOG00000009134	ENSRNOG00000024008	ENSRNOG00000005904	ENSRNOG00000021248	ENSRNOG00000004479	ENSRNOG00000004890	ENSRNOG00000005376	ENSRNOG00000021497	ENSRNOG00000009338	ENSRNOG00000016846	ENSRNOG00000029785	ENSRNOG00000004169	ENSRNOG00000006984	ENSRNOG00000058539	ENSRNOG00000004534	ENSRNOG00000019465	ENSRNOG00000011295	ENSRNOG00000018677	ENSRNOG00000032778	ENSRNOG00000008567	ENSRNOG00000019834	ENSRNOG00000000145	ENSRNOG00000020155	ENSRNOG00000056810	ENSRNOG00000016965	ENSRNOG00000043425	ENSRNOG00000007219	ENSRNOG00000010957	ENSRNOG00000002951	ENSRNOG00000018296	ENSRNOG00000023622	ENSRNOG00000057096	ENSRNOG00000056371	ENSRNOG00000003657	ENSRNOG00000001849	ENSRNOG00000001265	ENSRNOG00000002823	ENSRNOG00000006831	ENSRNOG00000020401	ENSRNOG00000014776	ENSRNOG00000016384	ENSRNOG00000004130	ENSRNOG00000033169	ENSRNOG00000018903
Aldosterone-regulated sodium reabsorption	ENSRNOG00000029986	ENSRNOG00000017084	ENSRNOG00000002934	ENSRNOG00000009338	ENSRNOG00000016846	ENSRNOG00000017842	ENSRNOG00000019368	ENSRNOG00000014578	ENSRNOG00000000145	ENSRNOG00000056810	ENSRNOG00000023622	ENSRNOG00000056371	ENSRNOG00000001849	ENSRNOG00000016384	ENSRNOG00000030019	ENSRNOG00000018903	ENSRNOG00000003491	ENSRNOG00000020263	ENSRNOG00000016469	ENSRNOG00000006136	ENSRNOG00000034007	ENSRNOG00000020405	ENSRNOG00000007290	ENSRNOG00000017610	ENSRNOG00000030981	ENSRNOG00000059005	ENSRNOG00000032378	ENSRNOG00000033153	ENSRNOG00000011227	ENSRNOG00000004188	ENSRNOG00000019228	ENSRNOG00000012061	ENSRNOG00000012052	ENSRNOG00000014597	ENSRNOG00000011501	ENSRNOG00000002997	ENSRNOG00000054371	ENSRNOG00000011815	ENSRNOG00000053583	ENSRNOG00000007059	ENSRNOG00000004517
MicroRNAs in cancer	ENSRNOG00000002548	ENSRNOG00000040287	ENSRNOG00000000485	ENSRNOG00000047356	ENSRNOG00000019883	ENSRNOG00000016810	ENSRNOG00000029273	ENSRNOG00000002791	ENSRNOG00000004500	ENSRNOG00000000442	ENSRNOG00000018835	ENSRNOG00000002468	ENSRNOG00000002525	ENSRNOG00000006048	ENSRNOG00000047907	ENSRNOG00000014080	ENSRNOG00000024008	ENSRNOG00000021248	ENSRNOG00000004677	ENSRNOG00000018461	ENSRNOG00000057078	ENSRNOG00000001312	ENSRNOG00000009338	ENSRNOG00000018184	ENSRNOG00000013062	ENSRNOG00000016846	ENSRNOG00000019742	ENSRNOG00000033791	ENSRNOG00000003821	ENSRNOG00000004362	ENSRNOG00000004346	ENSRNOG00000016203	ENSRNOG00000052745	ENSRNOG00000007591	ENSRNOG00000042460	ENSRNOG00000010625	ENSRNOG00000015603	ENSRNOG00000007529	ENSRNOG00000020372	ENSRNOG00000057978	ENSRNOG00000023079	ENSRNOG00000017907	ENSRNOG00000057322	ENSRNOG00000004303	ENSRNOG00000003256	ENSRNOG00000047741	ENSRNOG00000019598	ENSRNOG00000025792	ENSRNOG00000001868
Huntington disease	ENSRNOG00000030644	ENSRNOG00000031033	ENSRNOG00000034234	ENSRNOG00000030371	ENSRNOG00000033299	ENSRNOG00000031979	ENSRNOG00000030700	ENSRNOG00000033615	ENSRNOG00000031053	ENSRNOG00000029707	ENSRNOG00000029971	ENSRNOG00000029042	ENSRNOG00000031766	ENSRNOG00000039980	ENSRNOG00000002079	ENSRNOG00000052226	ENSRNOG00000016660	ENSRNOG00000016789	ENSRNOG00000023387	ENSRNOG00000007756	ENSRNOG00000049394	ENSRNOG00000060984	ENSRNOG00000061543	ENSRNOG00000038398	ENSRNOG00000061216	ENSRNOG00000042333	ENSRNOG00000062245	ENSRNOG00000013545	ENSRNOG00000011572	ENSRNOG00000017209	ENSRNOG00000020513	ENSRNOG00000054689	ENSRNOG00000016000	ENSRNOG00000046299	ENSRNOG00000015720	ENSRNOG00000019725	ENSRNOG00000048562	ENSRNOG00000032254	ENSRNOG00000017817	ENSRNOG00000020602	ENSRNOG00000018101	ENSRNOG00000004680	ENSRNOG00000010830	ENSRNOG00000038076	ENSRNOG00000012944	ENSRNOG00000005413	ENSRNOG00000008622	ENSRNOG00000059061	ENSRNOG00000021177
ErbB signaling pathway	ENSRNOG00000047356	ENSRNOG00000002079	ENSRNOG00000051964	ENSRNOG00000019883	ENSRNOG00000012582	ENSRNOG00000004500	ENSRNOG00000014917	ENSRNOG00000009783	ENSRNOG00000001982	ENSRNOG00000021497	ENSRNOG00000003919	ENSRNOG00000009338	ENSRNOG00000016846	ENSRNOG00000019496	ENSRNOG00000003834	ENSRNOG00000004305	ENSRNOG00000011589	ENSRNOG00000023079	ENSRNOG00000007925	ENSRNOG00000009495	ENSRNOG00000018677	ENSRNOG00000018646	ENSRNOG00000025792	ENSRNOG00000001868	ENSRNOG00000020657	ENSRNOG00000000145	ENSRNOG00000019075	ENSRNOG00000006450	ENSRNOG00000051986	ENSRNOG00000002728	ENSRNOG00000002754	ENSRNOG00000002833	ENSRNOG00000020155	ENSRNOG00000004826	ENSRNOG00000056810	ENSRNOG00000010957	ENSRNOG00000023622	ENSRNOG00000008030	ENSRNOG00000056371	ENSRNOG00000001849	ENSRNOG00000002823	ENSRNOG00000037360	ENSRNOG00000052080	ENSRNOG00000016384	ENSRNOG00000051490	ENSRNOG00000010171	ENSRNOG00000009371	ENSRNOG00000018903	ENSRNOG00000007916
One carbon pool by folate	ENSRNOG00000013521	ENSRNOG00000050214	ENSRNOG00000013229	ENSRNOG00000005602	ENSRNOG00000017740	ENSRNOG00000021347	ENSRNOG00000008106	ENSRNOG00000047023	ENSRNOG00000005275	ENSRNOG00000001261	ENSRNOG00000037225	ENSRNOG00000019582	ENSRNOG00000008586	ENSRNOG00000014602	ENSRNOG00000015511	ENSRNOG00000028292	ENSRNOG00000010833	ENSRNOG00000008553	ENSRNOG00000017593
Toll-like receptor signaling pathway	ENSRNOG00000017285	ENSRNOG00000043451	ENSRNOG00000002079	ENSRNOG00000000513	ENSRNOG00000000515	ENSRNOG00000002161	ENSRNOG00000000837	ENSRNOG00000010906	ENSRNOG00000001068	ENSRNOG00000011205	ENSRNOG00000011406	ENSRNOG00000047035	ENSRNOG00000021726	ENSRNOG00000030888	ENSRNOG00000052145	ENSRNOG00000018488	ENSRNOG00000021497	ENSRNOG00000006268	ENSRNOG00000048161	ENSRNOG00000016846	ENSRNOG00000021155	ENSRNOG00000010278	ENSRNOG00000003834	ENSRNOG00000007437	ENSRNOG00000006984	ENSRNOG00000004437	ENSRNOG00000016054	ENSRNOG00000018677	ENSRNOG00000022067	ENSRNOG00000008145	ENSRNOG00000045992	ENSRNOG00000000145	ENSRNOG00000022485	ENSRNOG00000005965	ENSRNOG00000012331	ENSRNOG00000020155	ENSRNOG00000014532	ENSRNOG00000056810	ENSRNOG00000013634	ENSRNOG00000014079	ENSRNOG00000058365	ENSRNOG00000023622	ENSRNOG00000056371	ENSRNOG00000001849	ENSRNOG00000002823	ENSRNOG00000016384	ENSRNOG00000004380	ENSRNOG00000022298	ENSRNOG00000018903
NOD-like receptor signaling pathway	ENSRNOG00000017285	ENSRNOG00000052795	ENSRNOG00000002079	ENSRNOG00000000513	ENSRNOG00000000515	ENSRNOG00000002791	ENSRNOG00000000837	ENSRNOG00000010906	ENSRNOG00000048580	ENSRNOG00000047035	ENSRNOG00000007728	ENSRNOG00000013014	ENSRNOG00000007372	ENSRNOG00000001296	ENSRNOG00000003170	ENSRNOG00000016346	ENSRNOG00000030888	ENSRNOG00000010331	ENSRNOG00000052145	ENSRNOG00000006268	ENSRNOG00000005810	ENSRNOG00000020063	ENSRNOG00000010278	ENSRNOG00000051470	ENSRNOG00000001813	ENSRNOG00000046453	ENSRNOG00000006984	ENSRNOG00000000081	ENSRNOG00000004810	ENSRNOG00000001369	ENSRNOG00000016054	ENSRNOG00000047076	ENSRNOG00000023143	ENSRNOG00000009848	ENSRNOG00000017913	ENSRNOG00000045677	ENSRNOG00000031726	ENSRNOG00000008145	ENSRNOG00000000157	ENSRNOG00000011317	ENSRNOG00000029462	ENSRNOG00000021150	ENSRNOG00000032240	ENSRNOG00000002265	ENSRNOG00000061751	ENSRNOG00000058337	ENSRNOG00000020465	ENSRNOG00000019834	ENSRNOG00000042137
Neuroactive ligand-receptor interaction	ENSRNOG00000021468	ENSRNOG00000012103	ENSRNOG00000002953	ENSRNOG00000000368	ENSRNOG00000011335	ENSRNOG00000018899	ENSRNOG00000060599	ENSRNOG00000000774	ENSRNOG00000010803	ENSRNOG00000014862	ENSRNOG00000005944	ENSRNOG00000031437	ENSRNOG00000013610	ENSRNOG00000013829	ENSRNOG00000011202	ENSRNOG00000014427	ENSRNOG00000012448	ENSRNOG00000012674	ENSRNOG00000023664	ENSRNOG00000018808	ENSRNOG00000019208	ENSRNOG00000003972	ENSRNOG00000018393	ENSRNOG00000060806	ENSRNOG00000018191	ENSRNOG00000019486	ENSRNOG00000013872	ENSRNOG00000029756	ENSRNOG00000047481	ENSRNOG00000011954	ENSRNOG00000012562	ENSRNOG00000021547	ENSRNOG00000015788	ENSRNOG00000050743	ENSRNOG00000043375	ENSRNOG00000018827	ENSRNOG00000037845	ENSRNOG00000047457	ENSRNOG00000016307	ENSRNOG00000045612	ENSRNOG00000031307	ENSRNOG00000039075	ENSRNOG00000003442	ENSRNOG00000047649	ENSRNOG00000018054	ENSRNOG00000001296	ENSRNOG00000007647	ENSRNOG00000042605	ENSRNOG00000045732
Maturity onset diabetes of the young	ENSRNOG00000005609	ENSRNOG00000025164	ENSRNOG00000002598	ENSRNOG00000007668	ENSRNOG00000061527	ENSRNOG00000000653	ENSRNOG00000008971	ENSRNOG00000001720	ENSRNOG00000046959	ENSRNOG00000008895	ENSRNOG00000020420	ENSRNOG00000004410	ENSRNOG00000020405	ENSRNOG00000027949	ENSRNOG00000012728	ENSRNOG00000008095	ENSRNOG00000008020	ENSRNOG00000013133	ENSRNOG00000011875	ENSRNOG00000001183	ENSRNOG00000059889	ENSRNOG00000046458	ENSRNOG00000012052	ENSRNOG00000012417	ENSRNOG00000016595	ENSRNOG00000024413	ENSRNOG00000002149	ENSRNOG00000014256
Phosphatidylinositol signaling system	ENSRNOG00000019730	ENSRNOG00000052795	ENSRNOG00000025883	ENSRNOG00000002338	ENSRNOG00000006697	ENSRNOG00000015631	ENSRNOG00000011613	ENSRNOG00000039323	ENSRNOG00000015232	ENSRNOG00000004060	ENSRNOG00000017020	ENSRNOG00000016770	ENSRNOG00000016846	ENSRNOG00000017840	ENSRNOG00000021024	ENSRNOG00000003875	ENSRNOG00000004810	ENSRNOG00000017660	ENSRNOG00000002969	ENSRNOG00000030771	ENSRNOG00000020577	ENSRNOG00000005923	ENSRNOG00000021150	ENSRNOG00000058337	ENSRNOG00000024144	ENSRNOG00000000145	ENSRNOG00000007120	ENSRNOG00000032238	ENSRNOG00000015158	ENSRNOG00000051986	ENSRNOG00000008051	ENSRNOG00000014675	ENSRNOG00000001796	ENSRNOG00000056810	ENSRNOG00000020361	ENSRNOG00000046647	ENSRNOG00000023622	ENSRNOG00000005138	ENSRNOG00000056371	ENSRNOG00000019361	ENSRNOG00000002142	ENSRNOG00000000609	ENSRNOG00000003033	ENSRNOG00000016384	ENSRNOG00000060045	ENSRNOG00000051490	ENSRNOG00000034228	ENSRNOG00000031955	ENSRNOG00000018903
RIG-I-like receptor signaling pathway	ENSRNOG00000002079	ENSRNOG00000000513	ENSRNOG00000000515	ENSRNOG00000000837	ENSRNOG00000047035	ENSRNOG00000030888	ENSRNOG00000052145	ENSRNOG00000006268	ENSRNOG00000020063	ENSRNOG00000010096	ENSRNOG00000006984	ENSRNOG00000013177	ENSRNOG00000002501	ENSRNOG00000018247	ENSRNOG00000008145	ENSRNOG00000000157	ENSRNOG00000042137	ENSRNOG00000022485	ENSRNOG00000012331	ENSRNOG00000057832	ENSRNOG00000020155	ENSRNOG00000058365	ENSRNOG00000002823	ENSRNOG00000004380	ENSRNOG00000014048	ENSRNOG00000024204	ENSRNOG00000022256	ENSRNOG00000006227	ENSRNOG00000009468	ENSRNOG00000005528	ENSRNOG00000042840	ENSRNOG00000017502	ENSRNOG00000055156	ENSRNOG00000006384	ENSRNOG00000059274	ENSRNOG00000023258	ENSRNOG00000025100	ENSRNOG00000052386	ENSRNOG00000033602	ENSRNOG00000021802	ENSRNOG00000060936	ENSRNOG00000006238	ENSRNOG00000058501	ENSRNOG00000017414	ENSRNOG00000023383	ENSRNOG00000020474	ENSRNOG00000022990	ENSRNOG00000031046	ENSRNOG00000047516
Malaria	ENSRNOG00000048472	ENSRNOG00000000837	ENSRNOG00000005906	ENSRNOG00000043176	ENSRNOG00000040108	ENSRNOG00000002723	ENSRNOG00000002794	ENSRNOG00000049342	ENSRNOG00000014312	ENSRNOG00000046089	ENSRNOG00000049830	ENSRNOG00000047797	ENSRNOG00000049773	ENSRNOG00000046292	ENSRNOG00000018488	ENSRNOG00000033801	ENSRNOG00000048161	ENSRNOG00000046646	ENSRNOG00000048670	ENSRNOG00000051843	ENSRNOG00000010278	ENSRNOG00000048203	ENSRNOG00000054269	ENSRNOG00000054267	ENSRNOG00000053359	ENSRNOG00000042119	ENSRNOG00000048115	ENSRNOG00000052745	ENSRNOG00000049928	ENSRNOG00000061828	ENSRNOG00000046976	ENSRNOG00000009848	ENSRNOG00000058237	ENSRNOG00000047444	ENSRNOG00000053791	ENSRNOG00000046956	ENSRNOG00000007468	ENSRNOG00000012471	ENSRNOG00000061739	ENSRNOG00000007310	ENSRNOG00000010529	ENSRNOG00000046957	ENSRNOG00000004647	ENSRNOG00000047808	ENSRNOG00000007159	ENSRNOG00000058105	ENSRNOG00000004936	ENSRNOG00000013634	ENSRNOG00000045632
Ascorbate and aldarate metabolism	ENSRNOG00000001980	ENSRNOG00000046540	ENSRNOG00000020623	ENSRNOG00000001990	ENSRNOG00000007949	ENSRNOG00000001344	ENSRNOG00000002342	ENSRNOG00000011497	ENSRNOG00000008694	ENSRNOG00000001973	ENSRNOG00000042714	ENSRNOG00000016648	ENSRNOG00000002643	ENSRNOG00000004027	ENSRNOG00000018740	ENSRNOG00000014645
ABC transporters	ENSRNOG00000030216	ENSRNOG00000000457	ENSRNOG00000000455	ENSRNOG00000012939	ENSRNOG00000039890	ENSRNOG00000007041	ENSRNOG00000006398	ENSRNOG00000039656	ENSRNOG00000004147	ENSRNOG00000057978	ENSRNOG00000050860	ENSRNOG00000055103	ENSRNOG00000015666	ENSRNOG00000017993	ENSRNOG00000038149	ENSRNOG00000018126	ENSRNOG00000002948	ENSRNOG00000050057	ENSRNOG00000038115	ENSRNOG00000034275	ENSRNOG00000008862	ENSRNOG00000013768	ENSRNOG00000012892	ENSRNOG00000059326	ENSRNOG00000005250	ENSRNOG00000004378	ENSRNOG00000015248	ENSRNOG00000008012	ENSRNOG00000056524	ENSRNOG00000018697	ENSRNOG00000001158	ENSRNOG00000001082	ENSRNOG00000018863	ENSRNOG00000011964	ENSRNOG00000025645	ENSRNOG00000015538	ENSRNOG00000046727	ENSRNOG00000046890	ENSRNOG00000015783	ENSRNOG00000011929	ENSRNOG00000022305	ENSRNOG00000036960	ENSRNOG00000032089	ENSRNOG00000010064	ENSRNOG00000005420	ENSRNOG00000029178	ENSRNOG00000043296	ENSRNOG00000008557	ENSRNOG00000021130
Chagas disease (American trypanosomiasis)	ENSRNOG00000002079	ENSRNOG00000000513	ENSRNOG00000000515	ENSRNOG00000007467	ENSRNOG00000062101	ENSRNOG00000002978	ENSRNOG00000002161	ENSRNOG00000000837	ENSRNOG00000010906	ENSRNOG00000011205	ENSRNOG00000047035	ENSRNOG00000049342	ENSRNOG00000014312	ENSRNOG00000046089	ENSRNOG00000049830	ENSRNOG00000047797	ENSRNOG00000049773	ENSRNOG00000046292	ENSRNOG00000030888	ENSRNOG00000014840	ENSRNOG00000021497	ENSRNOG00000006268	ENSRNOG00000033801	ENSRNOG00000005389	ENSRNOG00000048161	ENSRNOG00000046646	ENSRNOG00000048670	ENSRNOG00000051843	ENSRNOG00000016846	ENSRNOG00000010278	ENSRNOG00000048203	ENSRNOG00000047300	ENSRNOG00000054269	ENSRNOG00000054267	ENSRNOG00000053359	ENSRNOG00000003834	ENSRNOG00000042119	ENSRNOG00000048115	ENSRNOG00000006984	ENSRNOG00000004810	ENSRNOG00000049928	ENSRNOG00000061828	ENSRNOG00000015945	ENSRNOG00000046976	ENSRNOG00000019465	ENSRNOG00000058237	ENSRNOG00000018677	ENSRNOG00000019142	ENSRNOG00000047444
Jak-STAT signaling pathway	ENSRNOG00000002919	ENSRNOG00000051964	ENSRNOG00000002791	ENSRNOG00000051120	ENSRNOG00000015354	ENSRNOG00000003954	ENSRNOG00000062125	ENSRNOG00000014555	ENSRNOG00000023664	ENSRNOG00000004500	ENSRNOG00000028377	ENSRNOG00000016307	ENSRNOG00000039075	ENSRNOG00000047649	ENSRNOG00000008111	ENSRNOG00000017386	ENSRNOG00000017376	ENSRNOG00000007002	ENSRNOG00000004633	ENSRNOG00000049782	ENSRNOG00000018461	ENSRNOG00000052145	ENSRNOG00000021497	ENSRNOG00000006268	ENSRNOG00000001312	ENSRNOG00000017185	ENSRNOG00000046850	ENSRNOG00000016846	ENSRNOG00000019496	ENSRNOG00000019742	ENSRNOG00000026805	ENSRNOG00000017203	ENSRNOG00000010278	ENSRNOG00000012460	ENSRNOG00000003254	ENSRNOG00000047307	ENSRNOG00000017089	ENSRNOG00000007652	ENSRNOG00000059968	ENSRNOG00000048636	ENSRNOG00000016463	ENSRNOG00000026786	ENSRNOG00000011696	ENSRNOG00000016436	ENSRNOG00000002946	ENSRNOG00000018677	ENSRNOG00000039058	ENSRNOG00000060817	ENSRNOG00000015654
Hepatitis B	ENSRNOG00000017285	ENSRNOG00000017801	ENSRNOG00000002079	ENSRNOG00000000513	ENSRNOG00000000515	ENSRNOG00000002978	ENSRNOG00000029273	ENSRNOG00000002791	ENSRNOG00000000837	ENSRNOG00000017828	ENSRNOG00000004500	ENSRNOG00000000431	ENSRNOG00000047035	ENSRNOG00000021726	ENSRNOG00000030888	ENSRNOG00000012944	ENSRNOG00000005413	ENSRNOG00000008622	ENSRNOG00000052145	ENSRNOG00000023493	ENSRNOG00000021497	ENSRNOG00000006268	ENSRNOG00000009338	ENSRNOG00000016846	ENSRNOG00000019496	ENSRNOG00000019742	ENSRNOG00000012439	ENSRNOG00000012175	ENSRNOG00000010278	ENSRNOG00000003834	ENSRNOG00000016029	ENSRNOG00000006984	ENSRNOG00000004437	ENSRNOG00000013177	ENSRNOG00000059968	ENSRNOG00000008022	ENSRNOG00000016054	ENSRNOG00000002501	ENSRNOG00000023079	ENSRNOG00000009495	ENSRNOG00000010945	ENSRNOG00000018677	ENSRNOG00000047741	ENSRNOG00000019142	ENSRNOG00000008145	ENSRNOG00000054352	ENSRNOG00000007036	ENSRNOG00000020715	ENSRNOG00000000145
Purine metabolism	ENSRNOG00000045752	ENSRNOG00000029876	ENSRNOG00000051151	ENSRNOG00000049768	ENSRNOG00000002185	ENSRNOG00000004296	ENSRNOG00000016475	ENSRNOG00000039848	ENSRNOG00000052455	ENSRNOG00000031367	ENSRNOG00000012761	ENSRNOG00000020828	ENSRNOG00000018262	ENSRNOG00000025454	ENSRNOG00000004890	ENSRNOG00000059680	ENSRNOG00000015283	ENSRNOG00000014405	ENSRNOG00000018610	ENSRNOG00000016593	ENSRNOG00000012236	ENSRNOG00000042536	ENSRNOG00000031965	ENSRNOG00000019005	ENSRNOG00000012060	ENSRNOG00000060262	ENSRNOG00000046962	ENSRNOG00000011310	ENSRNOG00000007427	ENSRNOG00000014443	ENSRNOG00000033206	ENSRNOG00000047276	ENSRNOG00000015991	ENSRNOG00000046947	ENSRNOG00000009889	ENSRNOG00000018982	ENSRNOG00000025042	ENSRNOG00000002128	ENSRNOG00000012962	ENSRNOG00000011329	ENSRNOG00000015724	ENSRNOG00000009031	ENSRNOG00000010265	ENSRNOG00000054212	ENSRNOG00000005193	ENSRNOG00000007081	ENSRNOG00000014574	ENSRNOG00000046308	ENSRNOG00000011068
Osteoclast differentiation	ENSRNOG00000017285	ENSRNOG00000002079	ENSRNOG00000000513	ENSRNOG00000000515	ENSRNOG00000001480	ENSRNOG00000043210	ENSRNOG00000000596	ENSRNOG00000000837	ENSRNOG00000001068	ENSRNOG00000013014	ENSRNOG00000027808	ENSRNOG00000030888	ENSRNOG00000012160	ENSRNOG00000008658	ENSRNOG00000009705	ENSRNOG00000046663	ENSRNOG00000021497	ENSRNOG00000006268	ENSRNOG00000046261	ENSRNOG00000020845	ENSRNOG00000016846	ENSRNOG00000046667	ENSRNOG00000021155	ENSRNOG00000012175	ENSRNOG00000052357	ENSRNOG00000058422	ENSRNOG00000006984	ENSRNOG00000055716	ENSRNOG00000004437	ENSRNOG00000004575	ENSRNOG00000058538	ENSRNOG00000016054	ENSRNOG00000002946	ENSRNOG00000018677	ENSRNOG00000011882	ENSRNOG00000007468	ENSRNOG00000007036	ENSRNOG00000000145	ENSRNOG00000052407	ENSRNOG00000022485	ENSRNOG00000019568	ENSRNOG00000051986	ENSRNOG00000013578	ENSRNOG00000020155	ENSRNOG00000004763	ENSRNOG00000031081	ENSRNOG00000056810	ENSRNOG00000021199	ENSRNOG00000014079
Peroxisome	ENSRNOG00000013176	ENSRNOG00000003285	ENSRNOG00000009718	ENSRNOG00000011976	ENSRNOG00000000582	ENSRNOG00000021216	ENSRNOG00000017695	ENSRNOG00000015003	ENSRNOG00000049430	ENSRNOG00000015020	ENSRNOG00000018920	ENSRNOG00000010128	ENSRNOG00000013498	ENSRNOG00000016484	ENSRNOG00000015187	ENSRNOG00000008748	ENSRNOG00000016975	ENSRNOG00000020308	ENSRNOG00000017194	ENSRNOG00000012322	ENSRNOG00000049982	ENSRNOG00000024012	ENSRNOG00000023856	ENSRNOG00000049604	ENSRNOG00000008755	ENSRNOG00000022576	ENSRNOG00000019048	ENSRNOG00000018044	ENSRNOG00000007081	ENSRNOG00000011211	ENSRNOG00000010633	ENSRNOG00000057116	ENSRNOG00000001851	ENSRNOG00000019470	ENSRNOG00000001770	ENSRNOG00000056688	ENSRNOG00000011193	ENSRNOG00000019630	ENSRNOG00000016655	ENSRNOG00000015660	ENSRNOG00000028100	ENSRNOG00000007395	ENSRNOG00000006539	ENSRNOG00000002115	ENSRNOG00000056524	ENSRNOG00000018662	ENSRNOG00000014522	ENSRNOG00000051912	ENSRNOG00000019394
Neurotrophin signaling pathway	ENSRNOG00000017801	ENSRNOG00000047356	ENSRNOG00000002079	ENSRNOG00000000513	ENSRNOG00000000515	ENSRNOG00000013953	ENSRNOG00000000299	ENSRNOG00000002978	ENSRNOG00000002791	ENSRNOG00000001068	ENSRNOG00000006756	ENSRNOG00000004060	ENSRNOG00000031814	ENSRNOG00000047907	ENSRNOG00000016346	ENSRNOG00000030888	ENSRNOG00000009783	ENSRNOG00000021497	ENSRNOG00000005642	ENSRNOG00000020063	ENSRNOG00000009338	ENSRNOG00000016770	ENSRNOG00000016846	ENSRNOG00000007048	ENSRNOG00000014316	ENSRNOG00000009110	ENSRNOG00000004362	ENSRNOG00000006984	ENSRNOG00000013177	ENSRNOG00000011589	ENSRNOG00000021817	ENSRNOG00000023079	ENSRNOG00000020783	ENSRNOG00000018677	ENSRNOG00000031328	ENSRNOG00000025792	ENSRNOG00000023176	ENSRNOG00000013536	ENSRNOG00000001868	ENSRNOG00000020657	ENSRNOG00000002412	ENSRNOG00000001425	ENSRNOG00000000145	ENSRNOG00000051986	ENSRNOG00000005965	ENSRNOG00000002833	ENSRNOG00000020155	ENSRNOG00000042954	ENSRNOG00000004826
Salmonella infection	ENSRNOG00000017285	ENSRNOG00000000485	ENSRNOG00000020393	ENSRNOG00000002079	ENSRNOG00000000513	ENSRNOG00000000515	ENSRNOG00000014289	ENSRNOG00000025791	ENSRNOG00000060266	ENSRNOG00000028062	ENSRNOG00000048898	ENSRNOG00000045721	ENSRNOG00000002791	ENSRNOG00000001065	ENSRNOG00000002161	ENSRNOG00000000837	ENSRNOG00000001068	ENSRNOG00000038483	ENSRNOG00000000991	ENSRNOG00000000996	ENSRNOG00000004500	ENSRNOG00000011572	ENSRNOG00000047035	ENSRNOG00000007728	ENSRNOG00000060708	ENSRNOG00000012495	ENSRNOG00000007372	ENSRNOG00000003170	ENSRNOG00000002886	ENSRNOG00000018101	ENSRNOG00000023960	ENSRNOG00000028837	ENSRNOG00000030888	ENSRNOG00000014753	ENSRNOG00000006557	ENSRNOG00000043381	ENSRNOG00000000823	ENSRNOG00000021497	ENSRNOG00000028958	ENSRNOG00000050630	ENSRNOG00000018168	ENSRNOG00000005810	ENSRNOG00000056216	ENSRNOG00000048161	ENSRNOG00000023547	ENSRNOG00000018630	ENSRNOG00000052174	ENSRNOG00000028521	ENSRNOG00000010278
beta-Alanine metabolism	ENSRNOG00000017105	ENSRNOG00000020623	ENSRNOG00000051307	ENSRNOG00000021255	ENSRNOG00000028557	ENSRNOG00000018603	ENSRNOG00000015591	ENSRNOG00000017872	ENSRNOG00000001344	ENSRNOG00000002342	ENSRNOG00000011497	ENSRNOG00000002636	ENSRNOG00000008755	ENSRNOG00000001177	ENSRNOG00000001770	ENSRNOG00000011419	ENSRNOG00000024629	ENSRNOG00000038258	ENSRNOG00000014522	ENSRNOG00000018200	ENSRNOG00000008474	ENSRNOG00000018522	ENSRNOG00000052070	ENSRNOG00000000007	ENSRNOG00000004298	ENSRNOG00000027739	ENSRNOG00000004027	ENSRNOG00000017512	ENSRNOG00000014645	ENSRNOG00000002331	ENSRNOG00000047565
Kaposi sarcoma-associated herpesvirus infection	ENSRNOG00000000485	ENSRNOG00000052795	ENSRNOG00000049590	ENSRNOG00000002079	ENSRNOG00000000513	ENSRNOG00000000515	ENSRNOG00000043210	ENSRNOG00000000763	ENSRNOG00000058388	ENSRNOG00000029273	ENSRNOG00000048951	ENSRNOG00000031090	ENSRNOG00000050998	ENSRNOG00000000723	ENSRNOG00000050183	ENSRNOG00000039744	ENSRNOG00000031607	ENSRNOG00000061639	ENSRNOG00000001068	ENSRNOG00000002094	ENSRNOG00000029001	ENSRNOG00000029386	ENSRNOG00000049115	ENSRNOG00000045924	ENSRNOG00000000795	ENSRNOG00000042905	ENSRNOG00000032596	ENSRNOG00000000787	ENSRNOG00000000777	ENSRNOG00000004500	ENSRNOG00000033136	ENSRNOG00000060412	ENSRNOG00000047035	ENSRNOG00000040052	ENSRNOG00000022107	ENSRNOG00000059770	ENSRNOG00000047706	ENSRNOG00000020513	ENSRNOG00000030712	ENSRNOG00000038999	ENSRNOG00000004060	ENSRNOG00000002525	ENSRNOG00000021726	ENSRNOG00000038076	ENSRNOG00000030888	ENSRNOG00000025040	ENSRNOG00000012160	ENSRNOG00000012944	ENSRNOG00000052145
Choline metabolism in cancer	ENSRNOG00000002079	ENSRNOG00000002338	ENSRNOG00000051964	ENSRNOG00000029148	ENSRNOG00000012358	ENSRNOG00000048898	ENSRNOG00000000878	ENSRNOG00000001068	ENSRNOG00000012582	ENSRNOG00000039323	ENSRNOG00000015232	ENSRNOG00000011470	ENSRNOG00000046195	ENSRNOG00000031824	ENSRNOG00000018461	ENSRNOG00000010695	ENSRNOG00000021497	ENSRNOG00000001312	ENSRNOG00000048172	ENSRNOG00000003919	ENSRNOG00000009338	ENSRNOG00000016791	ENSRNOG00000016846	ENSRNOG00000016625	ENSRNOG00000007350	ENSRNOG00000023079	ENSRNOG00000030771	ENSRNOG00000018677	ENSRNOG00000020577	ENSRNOG00000008116	ENSRNOG00000026764	ENSRNOG00000000145	ENSRNOG00000058271	ENSRNOG00000008320	ENSRNOG00000042332	ENSRNOG00000020155	ENSRNOG00000004826	ENSRNOG00000001796	ENSRNOG00000056810	ENSRNOG00000010219	ENSRNOG00000037231	ENSRNOG00000011404	ENSRNOG00000022308	ENSRNOG00000023622	ENSRNOG00000056371	ENSRNOG00000001849	ENSRNOG00000002823	ENSRNOG00000037360	ENSRNOG00000002244
Viral protein interaction with cytokine and cytokine receptor	ENSRNOG00000014269	ENSRNOG00000048239	ENSRNOG00000000837	ENSRNOG00000000838	ENSRNOG00000010906	ENSRNOG00000038483	ENSRNOG00000028548	ENSRNOG00000003954	ENSRNOG00000030021	ENSRNOG00000011205	ENSRNOG00000011406	ENSRNOG00000003305	ENSRNOG00000059979	ENSRNOG00000049115	ENSRNOG00000012430	ENSRNOG00000020275	ENSRNOG00000004633	ENSRNOG00000059640	ENSRNOG00000015027	ENSRNOG00000010278	ENSRNOG00000047730	ENSRNOG00000024899	ENSRNOG00000048636	ENSRNOG00000009848	ENSRNOG00000002843	ENSRNOG00000012286	ENSRNOG00000034290	ENSRNOG00000010665	ENSRNOG00000004647	ENSRNOG00000007159	ENSRNOG00000011478	ENSRNOG00000018509	ENSRNOG00000047647	ENSRNOG00000006736	ENSRNOG00000018659	ENSRNOG00000013589	ENSRNOG00000015668	ENSRNOG00000004470	ENSRNOG00000022298	ENSRNOG00000022256	ENSRNOG00000015992	ENSRNOG00000006311	ENSRNOG00000000239	ENSRNOG00000018414	ENSRNOG00000007335	ENSRNOG00000026759	ENSRNOG00000006620	ENSRNOG00000016308	ENSRNOG00000002792
Phenylalanine metabolism	ENSRNOG00000038473	ENSRNOG00000051307	ENSRNOG00000043116	ENSRNOG00000021533	ENSRNOG00000028222	ENSRNOG00000033613	ENSRNOG00000017872	ENSRNOG00000034106	ENSRNOG00000029778	ENSRNOG00000020148	ENSRNOG00000002848	ENSRNOG00000052070	ENSRNOG00000006589	ENSRNOG00000012142	ENSRNOG00000033673	ENSRNOG00000006599	ENSRNOG00000016356	ENSRNOG00000007232	ENSRNOG00000036622	ENSRNOG00000017512	ENSRNOG00000016348	ENSRNOG00000011782	ENSRNOG00000004302	ENSRNOG00000012387	ENSRNOG00000002331	ENSRNOG00000004327	ENSRNOG00000001338
RNA degradation	ENSRNOG00000002912	ENSRNOG00000009245	ENSRNOG00000023140	ENSRNOG00000000421	ENSRNOG00000049822	ENSRNOG00000005982	ENSRNOG00000045593	ENSRNOG00000048725	ENSRNOG00000045895	ENSRNOG00000016015	ENSRNOG00000024212	ENSRNOG00000020635	ENSRNOG00000012409	ENSRNOG00000013141	ENSRNOG00000009125	ENSRNOG00000024025	ENSRNOG00000003354	ENSRNOG00000048708	ENSRNOG00000004284	ENSRNOG00000042126	ENSRNOG00000054891	ENSRNOG00000028592	ENSRNOG00000053932	ENSRNOG00000003600	ENSRNOG00000010719	ENSRNOG00000019525	ENSRNOG00000042951	ENSRNOG00000040297	ENSRNOG00000012962	ENSRNOG00000014674	ENSRNOG00000057494	ENSRNOG00000053234	ENSRNOG00000018310	ENSRNOG00000002828	ENSRNOG00000011785	ENSRNOG00000060337	ENSRNOG00000001512	ENSRNOG00000029749	ENSRNOG00000057942	ENSRNOG00000048365	ENSRNOG00000012271	ENSRNOG00000014599	ENSRNOG00000012750	ENSRNOG00000017895	ENSRNOG00000002075	ENSRNOG00000014525	ENSRNOG00000021052	ENSRNOG00000010795	ENSRNOG00000013078
Glycosphingolipid biosynthesis - lacto and neolacto series	ENSRNOG00000001653	ENSRNOG00000008544	ENSRNOG00000030983	ENSRNOG00000003251	ENSRNOG00000012019	ENSRNOG00000039210	ENSRNOG00000009267	ENSRNOG00000045801	ENSRNOG00000003114	ENSRNOG00000020995	ENSRNOG00000039906	ENSRNOG00000046258	ENSRNOG00000046958	ENSRNOG00000059461	ENSRNOG00000009736	ENSRNOG00000008475	ENSRNOG00000021011	ENSRNOG00000021014	ENSRNOG00000014018	ENSRNOG00000018764	ENSRNOG00000019843	ENSRNOG00000007625	ENSRNOG00000009157	ENSRNOG00000050908	ENSRNOG00000019179	ENSRNOG00000019609	ENSRNOG00000009850	ENSRNOG00000003551	ENSRNOG00000023778	ENSRNOG00000014156
Morphine addiction	ENSRNOG00000049768	ENSRNOG00000060599	ENSRNOG00000000774	ENSRNOG00000010803	ENSRNOG00000014862	ENSRNOG00000018191	ENSRNOG00000003442	ENSRNOG00000020828	ENSRNOG00000025040	ENSRNOG00000004890	ENSRNOG00000047914	ENSRNOG00000002327	ENSRNOG00000004560	ENSRNOG00000003512	ENSRNOG00000042536	ENSRNOG00000019005	ENSRNOG00000019465	ENSRNOG00000011310	ENSRNOG00000050469	ENSRNOG00000039562	ENSRNOG00000047799	ENSRNOG00000025042	ENSRNOG00000016701	ENSRNOG00000007645	ENSRNOG00000002349	ENSRNOG00000003680	ENSRNOG00000054212	ENSRNOG00000057096	ENSRNOG00000025889	ENSRNOG00000020401	ENSRNOG00000005369	ENSRNOG00000014776	ENSRNOG00000038205	ENSRNOG00000048980	ENSRNOG00000013048	ENSRNOG00000011439	ENSRNOG00000002336	ENSRNOG00000011417	ENSRNOG00000010280	ENSRNOG00000003491	ENSRNOG00000019482	ENSRNOG00000003241	ENSRNOG00000016592	ENSRNOG00000032417	ENSRNOG00000059456	ENSRNOG00000032150	ENSRNOG00000019308	ENSRNOG00000050231	ENSRNOG00000039350
Thyroid hormone signaling pathway	ENSRNOG00000000464	ENSRNOG00000019358	ENSRNOG00000003848	ENSRNOG00000003792	ENSRNOG00000002934	ENSRNOG00000004500	ENSRNOG00000000442	ENSRNOG00000010680	ENSRNOG00000011315	ENSRNOG00000018835	ENSRNOG00000032254	ENSRNOG00000012944	ENSRNOG00000000413	ENSRNOG00000021497	ENSRNOG00000009338	ENSRNOG00000002832	ENSRNOG00000016846	ENSRNOG00000004346	ENSRNOG00000004810	ENSRNOG00000023079	ENSRNOG00000009495	ENSRNOG00000006649	ENSRNOG00000018677	ENSRNOG00000021150	ENSRNOG00000001979	ENSRNOG00000058337	ENSRNOG00000007982	ENSRNOG00000000145	ENSRNOG00000032238	ENSRNOG00000051986	ENSRNOG00000002833	ENSRNOG00000001120	ENSRNOG00000053452	ENSRNOG00000000604	ENSRNOG00000019618	ENSRNOG00000056810	ENSRNOG00000011871	ENSRNOG00000014079	ENSRNOG00000017170	ENSRNOG00000023622	ENSRNOG00000000190	ENSRNOG00000056371	ENSRNOG00000001849	ENSRNOG00000009740	ENSRNOG00000061237	ENSRNOG00000009694	ENSRNOG00000003033	ENSRNOG00000010496	ENSRNOG00000016384
Hepatitis C	ENSRNOG00000054495	ENSRNOG00000010085	ENSRNOG00000000485	ENSRNOG00000051964	ENSRNOG00000002978	ENSRNOG00000001050	ENSRNOG00000029273	ENSRNOG00000000837	ENSRNOG00000004500	ENSRNOG00000047035	ENSRNOG00000051344	ENSRNOG00000036603	ENSRNOG00000021726	ENSRNOG00000030888	ENSRNOG00000012944	ENSRNOG00000045811	ENSRNOG00000052145	ENSRNOG00000046007	ENSRNOG00000021497	ENSRNOG00000006268	ENSRNOG00000005389	ENSRNOG00000003648	ENSRNOG00000001571	ENSRNOG00000009338	ENSRNOG00000016846	ENSRNOG00000019742	ENSRNOG00000012439	ENSRNOG00000016029	ENSRNOG00000001369	ENSRNOG00000008022	ENSRNOG00000047076	ENSRNOG00000023079	ENSRNOG00000002946	ENSRNOG00000010945	ENSRNOG00000018677	ENSRNOG00000047741	ENSRNOG00000031726	ENSRNOG00000011424	ENSRNOG00000019142	ENSRNOG00000001691	ENSRNOG00000008145	ENSRNOG00000007468	ENSRNOG00000018851	ENSRNOG00000000145	ENSRNOG00000011158	ENSRNOG00000022485	ENSRNOG00000059207	ENSRNOG00000012331	ENSRNOG00000002833
Non-alcoholic fatty liver disease (NAFLD)	ENSRNOG00000034234	ENSRNOG00000030371	ENSRNOG00000030700	ENSRNOG00000031766	ENSRNOG00000017801	ENSRNOG00000002079	ENSRNOG00000052226	ENSRNOG00000016660	ENSRNOG00000029986	ENSRNOG00000023387	ENSRNOG00000049394	ENSRNOG00000002978	ENSRNOG00000000837	ENSRNOG00000001068	ENSRNOG00000023664	ENSRNOG00000062245	ENSRNOG00000054689	ENSRNOG00000017817	ENSRNOG00000020602	ENSRNOG00000030888	ENSRNOG00000059061	ENSRNOG00000021177	ENSRNOG00000021497	ENSRNOG00000056216	ENSRNOG00000018816	ENSRNOG00000016846	ENSRNOG00000027593	ENSRNOG00000012439	ENSRNOG00000004526	ENSRNOG00000010278	ENSRNOG00000038218	ENSRNOG00000040005	ENSRNOG00000038616	ENSRNOG00000004143	ENSRNOG00000017571	ENSRNOG00000016952	ENSRNOG00000004575	ENSRNOG00000021688	ENSRNOG00000012864	ENSRNOG00000032134	ENSRNOG00000034161	ENSRNOG00000001142	ENSRNOG00000018281	ENSRNOG00000002946	ENSRNOG00000018677	ENSRNOG00000019142	ENSRNOG00000007706	ENSRNOG00000012550	ENSRNOG00000009155
Metabolism of xenobiotics by cytochrome P450	ENSRNOG00000028746	ENSRNOG00000012801	ENSRNOG00000040287	ENSRNOG00000049964	ENSRNOG00000049911	ENSRNOG00000049693	ENSRNOG00000047848	ENSRNOG00000001701	ENSRNOG00000001980	ENSRNOG00000046540	ENSRNOG00000001990	ENSRNOG00000013484	ENSRNOG00000033402	ENSRNOG00000006583	ENSRNOG00000017780	ENSRNOG00000024755	ENSRNOG00000019017	ENSRNOG00000019058	ENSRNOG00000060939	ENSRNOG00000016484	ENSRNOG00000017872	ENSRNOG00000017899	ENSRNOG00000038300	ENSRNOG00000019221	ENSRNOG00000003515	ENSRNOG00000012458	ENSRNOG00000029726	ENSRNOG00000007743	ENSRNOG00000016173	ENSRNOG00000061857	ENSRNOG00000018237	ENSRNOG00000004245	ENSRNOG00000001973	ENSRNOG00000042714	ENSRNOG00000046357	ENSRNOG00000020743	ENSRNOG00000045751	ENSRNOG00000032805	ENSRNOG00000047108	ENSRNOG00000052070	ENSRNOG00000052415	ENSRNOG00000049771	ENSRNOG00000047986	ENSRNOG00000000201	ENSRNOG00000029844	ENSRNOG00000056847	ENSRNOG00000046260	ENSRNOG00000012436	ENSRNOG00000032959
Tryptophan metabolism	ENSRNOG00000040287	ENSRNOG00000013975	ENSRNOG00000020623	ENSRNOG00000015354	ENSRNOG00000062125	ENSRNOG00000014555	ENSRNOG00000023587	ENSRNOG00000043116	ENSRNOG00000011861	ENSRNOG00000032432	ENSRNOG00000011182	ENSRNOG00000001344	ENSRNOG00000003709	ENSRNOG00000002342	ENSRNOG00000011497	ENSRNOG00000003880	ENSRNOG00000010697	ENSRNOG00000005061	ENSRNOG00000008575	ENSRNOG00000001324	ENSRNOG00000016173	ENSRNOG00000050205	ENSRNOG00000001770	ENSRNOG00000031263	ENSRNOG00000033923	ENSRNOG00000003307	ENSRNOG00000029778	ENSRNOG00000043426	ENSRNOG00000020148	ENSRNOG00000024629	ENSRNOG00000002848	ENSRNOG00000014907	ENSRNOG00000003884	ENSRNOG00000018522	ENSRNOG00000023612	ENSRNOG00000008364	ENSRNOG00000029993	ENSRNOG00000011672	ENSRNOG00000004027	ENSRNOG00000011612	ENSRNOG00000007232	ENSRNOG00000019500	ENSRNOG00000006364	ENSRNOG00000011250	ENSRNOG00000019189	ENSRNOG00000008714	ENSRNOG00000016097	ENSRNOG00000031189	ENSRNOG00000014645
Glioma	ENSRNOG00000000485	ENSRNOG00000051964	ENSRNOG00000029273	ENSRNOG00000004060	ENSRNOG00000009783	ENSRNOG00000018461	ENSRNOG00000021497	ENSRNOG00000001312	ENSRNOG00000009338	ENSRNOG00000016770	ENSRNOG00000006470	ENSRNOG00000016846	ENSRNOG00000016029	ENSRNOG00000011589	ENSRNOG00000023079	ENSRNOG00000018677	ENSRNOG00000047741	ENSRNOG00000013090	ENSRNOG00000020657	ENSRNOG00000000145	ENSRNOG00000051986	ENSRNOG00000004826	ENSRNOG00000056810	ENSRNOG00000010957	ENSRNOG00000020876	ENSRNOG00000023622	ENSRNOG00000025602	ENSRNOG00000008030	ENSRNOG00000056371	ENSRNOG00000001849	ENSRNOG00000037360	ENSRNOG00000002244	ENSRNOG00000021781	ENSRNOG00000052080	ENSRNOG00000016384	ENSRNOG00000014071	ENSRNOG00000051490	ENSRNOG00000031955	ENSRNOG00000018903	ENSRNOG00000006304	ENSRNOG00000060626	ENSRNOG00000003491	ENSRNOG00000020005	ENSRNOG00000016611	ENSRNOG00000038202	ENSRNOG00000019822	ENSRNOG00000010153	ENSRNOG00000010838	ENSRNOG00000016182
Carbohydrate digestion and absorption	ENSRNOG00000002934	ENSRNOG00000051171	ENSRNOG00000029979	ENSRNOG00000021497	ENSRNOG00000017775	ENSRNOG00000016846	ENSRNOG00000003681	ENSRNOG00000004810	ENSRNOG00000018677	ENSRNOG00000021150	ENSRNOG00000058337	ENSRNOG00000000145	ENSRNOG00000013147	ENSRNOG00000056810	ENSRNOG00000006116	ENSRNOG00000005268	ENSRNOG00000046891	ENSRNOG00000033529	ENSRNOG00000023622	ENSRNOG00000056371	ENSRNOG00000016384	ENSRNOG00000030019	ENSRNOG00000026177	ENSRNOG00000018903	ENSRNOG00000050620	ENSRNOG00000020263	ENSRNOG00000017693	ENSRNOG00000016469	ENSRNOG00000020902	ENSRNOG00000007290	ENSRNOG00000031067	ENSRNOG00000011875	ENSRNOG00000028629	ENSRNOG00000011361	ENSRNOG00000032378	ENSRNOG00000011227	ENSRNOG00000019228	ENSRNOG00000012061	ENSRNOG00000033119	ENSRNOG00000011501	ENSRNOG00000007059	ENSRNOG00000049045	ENSRNOG00000055613	ENSRNOG00000019589	ENSRNOG00000026235
Other glycan degradation	ENSRNOG00000032942	ENSRNOG00000061779	ENSRNOG00000056162	ENSRNOG00000000108	ENSRNOG00000015551	ENSRNOG00000051904	ENSRNOG00000016364	ENSRNOG00000018106	ENSRNOG00000036667	ENSRNOG00000049281	ENSRNOG00000010196	ENSRNOG00000023910	ENSRNOG00000030654	ENSRNOG00000016962	ENSRNOG00000010252	ENSRNOG00000027498	ENSRNOG00000019031	ENSRNOG00000009325	ENSRNOG00000025274	ENSRNOG00000052247
VEGF signaling pathway	ENSRNOG00000000513	ENSRNOG00000000515	ENSRNOG00000043210	ENSRNOG00000013294	ENSRNOG00000001068	ENSRNOG00000002525	ENSRNOG00000012944	ENSRNOG00000014832	ENSRNOG00000021497	ENSRNOG00000048172	ENSRNOG00000009338	ENSRNOG00000016846	ENSRNOG00000012175	ENSRNOG00000006984	ENSRNOG00000007350	ENSRNOG00000023079	ENSRNOG00000009495	ENSRNOG00000018677	ENSRNOG00000019598	ENSRNOG00000013536	ENSRNOG00000026764	ENSRNOG00000000145	ENSRNOG00000051986	ENSRNOG00000046829	ENSRNOG00000056810	ENSRNOG00000037231	ENSRNOG00000023622	ENSRNOG00000009745	ENSRNOG00000008030	ENSRNOG00000056371	ENSRNOG00000001849	ENSRNOG00000016384	ENSRNOG00000051490	ENSRNOG00000018903	ENSRNOG00000021032	ENSRNOG00000007916	ENSRNOG00000003491	ENSRNOG00000020005	ENSRNOG00000009348	ENSRNOG00000016611	ENSRNOG00000005368	ENSRNOG00000054782	ENSRNOG00000010153	ENSRNOG00000024904	ENSRNOG00000001149	ENSRNOG00000002657	ENSRNOG00000008135	ENSRNOG00000004726	ENSRNOG00000023546
Phototransduction - fly	ENSRNOG00000001079	ENSRNOG00000004060	ENSRNOG00000027331	ENSRNOG00000009783	ENSRNOG00000018478	ENSRNOG00000016770	ENSRNOG00000004810	ENSRNOG00000011589	ENSRNOG00000021150	ENSRNOG00000058337	ENSRNOG00000053452	ENSRNOG00000052061	ENSRNOG00000052080	ENSRNOG00000031955	ENSRNOG00000003491	ENSRNOG00000059456	ENSRNOG00000038202	ENSRNOG00000039350	ENSRNOG00000036701	ENSRNOG00000007104	ENSRNOG00000018712	ENSRNOG00000011133	ENSRNOG00000033119	ENSRNOG00000028576	ENSRNOG00000014183	ENSRNOG00000030871	ENSRNOG00000048082	ENSRNOG00000027264	ENSRNOG00000030022	ENSRNOG00000018985	ENSRNOG00000034254
Bacterial invasion of epithelial cells	ENSRNOG00000020393	ENSRNOG00000043182	ENSRNOG00000014289	ENSRNOG00000028062	ENSRNOG00000026490	ENSRNOG00000001068	ENSRNOG00000009134	ENSRNOG00000000991	ENSRNOG00000047280	ENSRNOG00000000996	ENSRNOG00000005798	ENSRNOG00000015800	ENSRNOG00000000373	ENSRNOG00000000378	ENSRNOG00000016846	ENSRNOG00000002182	ENSRNOG00000052745	ENSRNOG00000054121	ENSRNOG00000009495	ENSRNOG00000057713	ENSRNOG00000025792	ENSRNOG00000013536	ENSRNOG00000001868	ENSRNOG00000018683	ENSRNOG00000020657	ENSRNOG00000013152	ENSRNOG00000000145	ENSRNOG00000003137	ENSRNOG00000053452	ENSRNOG00000017952	ENSRNOG00000042954	ENSRNOG00000008673	ENSRNOG00000056810	ENSRNOG00000033835	ENSRNOG00000023622	ENSRNOG00000008030	ENSRNOG00000056371	ENSRNOG00000010966	ENSRNOG00000008994	ENSRNOG00000050519	ENSRNOG00000010765	ENSRNOG00000016384	ENSRNOG00000014549	ENSRNOG00000018903	ENSRNOG00000007916	ENSRNOG00000050994	ENSRNOG00000007686	ENSRNOG00000059705	ENSRNOG00000014317
Regulation of actin cytoskeleton	ENSRNOG00000004861	ENSRNOG00000014289	ENSRNOG00000051964	ENSRNOG00000029148	ENSRNOG00000019883	ENSRNOG00000057702	ENSRNOG00000028062	ENSRNOG00000001068	ENSRNOG00000001235	ENSRNOG00000000991	ENSRNOG00000000996	ENSRNOG00000030118	ENSRNOG00000061530	ENSRNOG00000015232	ENSRNOG00000012002	ENSRNOG00000020899	ENSRNOG00000006557	ENSRNOG00000020660	ENSRNOG00000018461	ENSRNOG00000010695	ENSRNOG00000002215	ENSRNOG00000010758	ENSRNOG00000021789	ENSRNOG00000001312	ENSRNOG00000061270	ENSRNOG00000005580	ENSRNOG00000048172	ENSRNOG00000009338	ENSRNOG00000016846	ENSRNOG00000033791	ENSRNOG00000012208	ENSRNOG00000047300	ENSRNOG00000018708	ENSRNOG00000001470	ENSRNOG00000027894	ENSRNOG00000007350	ENSRNOG00000015733	ENSRNOG00000023079	ENSRNOG00000007925	ENSRNOG00000009495	ENSRNOG00000017546	ENSRNOG00000016538	ENSRNOG00000008567	ENSRNOG00000020577	ENSRNOG00000018991	ENSRNOG00000019688	ENSRNOG00000025792	ENSRNOG00000013536	ENSRNOG00000001868
Endocytosis	ENSRNOG00000011540	ENSRNOG00000049590	ENSRNOG00000014269	ENSRNOG00000048239	ENSRNOG00000014289	ENSRNOG00000000763	ENSRNOG00000058975	ENSRNOG00000028062	ENSRNOG00000061543	ENSRNOG00000011653	ENSRNOG00000045654	ENSRNOG00000001065	ENSRNOG00000048951	ENSRNOG00000031090	ENSRNOG00000047966	ENSRNOG00000050647	ENSRNOG00000050998	ENSRNOG00000000723	ENSRNOG00000050183	ENSRNOG00000039744	ENSRNOG00000031607	ENSRNOG00000061639	ENSRNOG00000004036	ENSRNOG00000026490	ENSRNOG00000003954	ENSRNOG00000056826	ENSRNOG00000058940	ENSRNOG00000029001	ENSRNOG00000029386	ENSRNOG00000049115	ENSRNOG00000014083	ENSRNOG00000018430	ENSRNOG00000000991	ENSRNOG00000045924	ENSRNOG00000000795	ENSRNOG00000042905	ENSRNOG00000032596	ENSRNOG00000000787	ENSRNOG00000000777	ENSRNOG00000000996	ENSRNOG00000033136	ENSRNOG00000060412	ENSRNOG00000000999	ENSRNOG00000040052	ENSRNOG00000022107	ENSRNOG00000051179	ENSRNOG00000048699	ENSRNOG00000059770	ENSRNOG00000047706
Phototransduction	ENSRNOG00000018430	ENSRNOG00000004060	ENSRNOG00000016770	ENSRNOG00000052051	ENSRNOG00000046962	ENSRNOG00000031773	ENSRNOG00000015623	ENSRNOG00000019086	ENSRNOG00000018185	ENSRNOG00000031955	ENSRNOG00000011144	ENSRNOG00000038202	ENSRNOG00000010546	ENSRNOG00000016638	ENSRNOG00000017816	ENSRNOG00000015402	ENSRNOG00000003800	ENSRNOG00000028576	ENSRNOG00000030871	ENSRNOG00000048082	ENSRNOG00000007931	ENSRNOG00000017589	ENSRNOG00000000065	ENSRNOG00000019296	ENSRNOG00000004778	ENSRNOG00000015058	ENSRNOG00000003633
Pancreatic cancer	ENSRNOG00000000485	ENSRNOG00000002079	ENSRNOG00000001111	ENSRNOG00000051147	ENSRNOG00000000889	ENSRNOG00000051964	ENSRNOG00000013461	ENSRNOG00000029273	ENSRNOG00000001068	ENSRNOG00000030888	ENSRNOG00000012944	ENSRNOG00000021497	ENSRNOG00000048172	ENSRNOG00000003919	ENSRNOG00000009338	ENSRNOG00000016846	ENSRNOG00000019742	ENSRNOG00000016029	ENSRNOG00000007350	ENSRNOG00000018677	ENSRNOG00000047741	ENSRNOG00000019598	ENSRNOG00000013536	ENSRNOG00000007036	ENSRNOG00000013090	ENSRNOG00000000145	ENSRNOG00000022485	ENSRNOG00000006450	ENSRNOG00000020155	ENSRNOG00000056810	ENSRNOG00000010219	ENSRNOG00000037302	ENSRNOG00000010957	ENSRNOG00000020876	ENSRNOG00000014079	ENSRNOG00000023622	ENSRNOG00000025602	ENSRNOG00000056371	ENSRNOG00000001849	ENSRNOG00000002823	ENSRNOG00000020652	ENSRNOG00000008620	ENSRNOG00000016384	ENSRNOG00000014071	ENSRNOG00000011157	ENSRNOG00000018903	ENSRNOG00000060626	ENSRNOG00000013454	ENSRNOG00000007946
Valine, leucine and isoleucine degradation	ENSRNOG00000013975	ENSRNOG00000020623	ENSRNOG00000015354	ENSRNOG00000062125	ENSRNOG00000014555	ENSRNOG00000017752	ENSRNOG00000043116	ENSRNOG00000043094	ENSRNOG00000028557	ENSRNOG00000017821	ENSRNOG00000011684	ENSRNOG00000015077	ENSRNOG00000001344	ENSRNOG00000050843	ENSRNOG00000002342	ENSRNOG00000020956	ENSRNOG00000011497	ENSRNOG00000016552	ENSRNOG00000000967	ENSRNOG00000013766	ENSRNOG00000010697	ENSRNOG00000002636	ENSRNOG00000001177	ENSRNOG00000001770	ENSRNOG00000020624	ENSRNOG00000011193	ENSRNOG00000033923	ENSRNOG00000008063	ENSRNOG00000011419	ENSRNOG00000057042	ENSRNOG00000020148	ENSRNOG00000009928	ENSRNOG00000024629	ENSRNOG00000020607	ENSRNOG00000015514	ENSRNOG00000018522	ENSRNOG00000009421	ENSRNOG00000013293	ENSRNOG00000015869	ENSRNOG00000009845	ENSRNOG00000048164	ENSRNOG00000003049	ENSRNOG00000004027	ENSRNOG00000010800	ENSRNOG00000007232	ENSRNOG00000019120	ENSRNOG00000006364	ENSRNOG00000019189	ENSRNOG00000014645
Tyrosine metabolism	ENSRNOG00000015354	ENSRNOG00000062125	ENSRNOG00000014555	ENSRNOG00000038473	ENSRNOG00000051307	ENSRNOG00000047708	ENSRNOG00000043116	ENSRNOG00000021533	ENSRNOG00000028222	ENSRNOG00000033613	ENSRNOG00000017872	ENSRNOG00000020410	ENSRNOG00000014727	ENSRNOG00000004646	ENSRNOG00000034106	ENSRNOG00000002701	ENSRNOG00000033923	ENSRNOG00000016421	ENSRNOG00000029778	ENSRNOG00000013223	ENSRNOG00000020148	ENSRNOG00000046357	ENSRNOG00000002848	ENSRNOG00000052070	ENSRNOG00000006589	ENSRNOG00000033673	ENSRNOG00000006599	ENSRNOG00000016356	ENSRNOG00000006641	ENSRNOG00000046057	ENSRNOG00000001889	ENSRNOG00000012436	ENSRNOG00000032959	ENSRNOG00000007232	ENSRNOG00000017512	ENSRNOG00000016348	ENSRNOG00000011782	ENSRNOG00000029318	ENSRNOG00000023434	ENSRNOG00000002331	ENSRNOG00000004327	ENSRNOG00000001338
Glycolysis / Gluconeogenesis	ENSRNOG00000020623	ENSRNOG00000002185	ENSRNOG00000023150	ENSRNOG00000051171	ENSRNOG00000058249	ENSRNOG00000013009	ENSRNOG00000023960	ENSRNOG00000013141	ENSRNOG00000010133	ENSRNOG00000028958	ENSRNOG00000050630	ENSRNOG00000061527	ENSRNOG00000023547	ENSRNOG00000018630	ENSRNOG00000042542	ENSRNOG00000017597	ENSRNOG00000013532	ENSRNOG00000017872	ENSRNOG00000058719	ENSRNOG00000001344	ENSRNOG00000009994	ENSRNOG00000017637	ENSRNOG00000002342	ENSRNOG00000047948	ENSRNOG00000011497	ENSRNOG00000048704	ENSRNOG00000047276	ENSRNOG00000016727	ENSRNOG00000013000	ENSRNOG00000009889	ENSRNOG00000030224	ENSRNOG00000011329	ENSRNOG00000052802	ENSRNOG00000007102	ENSRNOG00000048095	ENSRNOG00000006116	ENSRNOG00000046891	ENSRNOG00000018310	ENSRNOG00000038610	ENSRNOG00000007023	ENSRNOG00000028616	ENSRNOG00000001512	ENSRNOG00000026178	ENSRNOG00000020420	ENSRNOG00000057942	ENSRNOG00000048365	ENSRNOG00000021009	ENSRNOG00000017895	ENSRNOG00000050669
Inositol phosphate metabolism	ENSRNOG00000019730	ENSRNOG00000009955	ENSRNOG00000015631	ENSRNOG00000015232	ENSRNOG00000017020	ENSRNOG00000016846	ENSRNOG00000017840	ENSRNOG00000021024	ENSRNOG00000003875	ENSRNOG00000004810	ENSRNOG00000017660	ENSRNOG00000048676	ENSRNOG00000002969	ENSRNOG00000020577	ENSRNOG00000005923	ENSRNOG00000021150	ENSRNOG00000058337	ENSRNOG00000024144	ENSRNOG00000008694	ENSRNOG00000007120	ENSRNOG00000032238	ENSRNOG00000015158	ENSRNOG00000051986	ENSRNOG00000008051	ENSRNOG00000014675	ENSRNOG00000056810	ENSRNOG00000048095	ENSRNOG00000046647	ENSRNOG00000023622	ENSRNOG00000005138	ENSRNOG00000056371	ENSRNOG00000019361	ENSRNOG00000000609	ENSRNOG00000003033	ENSRNOG00000016384	ENSRNOG00000060045	ENSRNOG00000019741	ENSRNOG00000051490	ENSRNOG00000034228	ENSRNOG00000050669	ENSRNOG00000011420	ENSRNOG00000020479	ENSRNOG00000018382	ENSRNOG00000021068	ENSRNOG00000011419	ENSRNOG00000013030	ENSRNOG00000012375	ENSRNOG00000020388	ENSRNOG00000048506
Butanoate metabolism	ENSRNOG00000013975	ENSRNOG00000043094	ENSRNOG00000042084	ENSRNOG00000016552	ENSRNOG00000031211	ENSRNOG00000000967	ENSRNOG00000010697	ENSRNOG00000002636	ENSRNOG00000001177	ENSRNOG00000001736	ENSRNOG00000001770	ENSRNOG00000011193	ENSRNOG00000014490	ENSRNOG00000024629	ENSRNOG00000023538	ENSRNOG00000018200	ENSRNOG00000018522	ENSRNOG00000014726	ENSRNOG00000000007	ENSRNOG00000019120	ENSRNOG00000019189	ENSRNOG00000032246	ENSRNOG00000047565	ENSRNOG00000004857	ENSRNOG00000007862	ENSRNOG00000009422
Bile secretion	ENSRNOG00000013313	ENSRNOG00000049768	ENSRNOG00000002934	ENSRNOG00000036984	ENSRNOG00000007041	ENSRNOG00000029979	ENSRNOG00000049766	ENSRNOG00000004890	ENSRNOG00000017775	ENSRNOG00000011648	ENSRNOG00000061883	ENSRNOG00000017873	ENSRNOG00000010388	ENSRNOG00000050860	ENSRNOG00000055103	ENSRNOG00000018086	ENSRNOG00000007982	ENSRNOG00000007197	ENSRNOG00000003515	ENSRNOG00000015159	ENSRNOG00000010378	ENSRNOG00000002948	ENSRNOG00000025889	ENSRNOG00000000981	ENSRNOG00000020401	ENSRNOG00000030894	ENSRNOG00000014776	ENSRNOG00000030019	ENSRNOG00000056688	ENSRNOG00000016122	ENSRNOG00000020263	ENSRNOG00000019626	ENSRNOG00000001765	ENSRNOG00000018420	ENSRNOG00000016469	ENSRNOG00000032150	ENSRNOG00000005250	ENSRNOG00000016043	ENSRNOG00000031249	ENSRNOG00000005794	ENSRNOG00000007290	ENSRNOG00000008012	ENSRNOG00000037753	ENSRNOG00000007284	ENSRNOG00000007395	ENSRNOG00000030538	ENSRNOG00000002229	ENSRNOG00000051569	ENSRNOG00000051912
Thermogenesis	ENSRNOG00000030644	ENSRNOG00000031033	ENSRNOG00000034234	ENSRNOG00000030371	ENSRNOG00000033299	ENSRNOG00000031979	ENSRNOG00000030700	ENSRNOG00000033615	ENSRNOG00000031053	ENSRNOG00000029707	ENSRNOG00000029971	ENSRNOG00000029042	ENSRNOG00000031766	ENSRNOG00000017030	ENSRNOG00000052226	ENSRNOG00000000513	ENSRNOG00000016660	ENSRNOG00000000515	ENSRNOG00000052096	ENSRNOG00000010676	ENSRNOG00000023387	ENSRNOG00000049394	ENSRNOG00000049768	ENSRNOG00000012674	ENSRNOG00000027049	ENSRNOG00000062245	ENSRNOG00000020487	ENSRNOG00000045913	ENSRNOG00000054689	ENSRNOG00000016000	ENSRNOG00000046299	ENSRNOG00000011470	ENSRNOG00000017817	ENSRNOG00000001408	ENSRNOG00000015086	ENSRNOG00000025385	ENSRNOG00000020602	ENSRNOG00000006137	ENSRNOG00000009271	ENSRNOG00000005413	ENSRNOG00000008622	ENSRNOG00000020288	ENSRNOG00000059061	ENSRNOG00000021177	ENSRNOG00000010557	ENSRNOG00000004890	ENSRNOG00000023493	ENSRNOG00000005642	ENSRNOG00000012443
Spinocerebellar ataxia	ENSRNOG00000052795	ENSRNOG00000002079	ENSRNOG00000007756	ENSRNOG00000012562	ENSRNOG00000020513	ENSRNOG00000007214	ENSRNOG00000038076	ENSRNOG00000017965	ENSRNOG00000021497	ENSRNOG00000016846	ENSRNOG00000011306	ENSRNOG00000017422	ENSRNOG00000017840	ENSRNOG00000027145	ENSRNOG00000011135	ENSRNOG00000004810	ENSRNOG00000012864	ENSRNOG00000000641	ENSRNOG00000012702	ENSRNOG00000018677	ENSRNOG00000014637	ENSRNOG00000018686	ENSRNOG00000021150	ENSRNOG00000014290	ENSRNOG00000058337	ENSRNOG00000000145	ENSRNOG00000002763	ENSRNOG00000020155	ENSRNOG00000021441	ENSRNOG00000056810	ENSRNOG00000001256	ENSRNOG00000016070	ENSRNOG00000023622	ENSRNOG00000056371	ENSRNOG00000014935	ENSRNOG00000002823	ENSRNOG00000003280	ENSRNOG00000016384	ENSRNOG00000058842	ENSRNOG00000020557	ENSRNOG00000008766	ENSRNOG00000018903	ENSRNOG00000061012	ENSRNOG00000026295	ENSRNOG00000003491	ENSRNOG00000021063	ENSRNOG00000010298	ENSRNOG00000003827	ENSRNOG00000005470
Drug metabolism - other enzymes	ENSRNOG00000028746	ENSRNOG00000012801	ENSRNOG00000049964	ENSRNOG00000017105	ENSRNOG00000045752	ENSRNOG00000051151	ENSRNOG00000001980	ENSRNOG00000046540	ENSRNOG00000001990	ENSRNOG00000003917	ENSRNOG00000050277	ENSRNOG00000013484	ENSRNOG00000029744	ENSRNOG00000031367	ENSRNOG00000033402	ENSRNOG00000049498	ENSRNOG00000039079	ENSRNOG00000025454	ENSRNOG00000012034	ENSRNOG00000013808	ENSRNOG00000024755	ENSRNOG00000019017	ENSRNOG00000019058	ENSRNOG00000032394	ENSRNOG00000060939	ENSRNOG00000008310	ENSRNOG00000031965	ENSRNOG00000038300	ENSRNOG00000015519	ENSRNOG00000014055	ENSRNOG00000007221	ENSRNOG00000019221	ENSRNOG00000048039	ENSRNOG00000052151	ENSRNOG00000012458	ENSRNOG00000029726	ENSRNOG00000007081	ENSRNOG00000011635	ENSRNOG00000007743	ENSRNOG00000015749	ENSRNOG00000061857	ENSRNOG00000018237	ENSRNOG00000020032	ENSRNOG00000004245	ENSRNOG00000048561	ENSRNOG00000012853	ENSRNOG00000001973	ENSRNOG00000011467	ENSRNOG00000021233
Colorectal cancer	ENSRNOG00000000485	ENSRNOG00000002079	ENSRNOG00000015796	ENSRNOG00000016134	ENSRNOG00000051964	ENSRNOG00000002791	ENSRNOG00000001068	ENSRNOG00000004500	ENSRNOG00000014753	ENSRNOG00000012944	ENSRNOG00000033099	ENSRNOG00000021497	ENSRNOG00000048172	ENSRNOG00000003919	ENSRNOG00000009338	ENSRNOG00000016846	ENSRNOG00000033791	ENSRNOG00000007350	ENSRNOG00000023079	ENSRNOG00000018677	ENSRNOG00000007036	ENSRNOG00000013993	ENSRNOG00000013090	ENSRNOG00000000145	ENSRNOG00000002754	ENSRNOG00000002833	ENSRNOG00000020155	ENSRNOG00000042954	ENSRNOG00000004826	ENSRNOG00000056810	ENSRNOG00000010219	ENSRNOG00000010957	ENSRNOG00000020876	ENSRNOG00000023622	ENSRNOG00000056371	ENSRNOG00000001849	ENSRNOG00000050519	ENSRNOG00000002823	ENSRNOG00000020652	ENSRNOG00000037360	ENSRNOG00000008620	ENSRNOG00000016384	ENSRNOG00000014071	ENSRNOG00000013574	ENSRNOG00000033559	ENSRNOG00000005872	ENSRNOG00000049232	ENSRNOG00000018903	ENSRNOG00000060626
Pancreatic secretion	ENSRNOG00000052795	ENSRNOG00000049768	ENSRNOG00000001068	ENSRNOG00000002934	ENSRNOG00000020532	ENSRNOG00000045612	ENSRNOG00000011302	ENSRNOG00000013771	ENSRNOG00000003069	ENSRNOG00000049766	ENSRNOG00000004890	ENSRNOG00000028092	ENSRNOG00000054902	ENSRNOG00000007048	ENSRNOG00000003064	ENSRNOG00000057470	ENSRNOG00000050119	ENSRNOG00000004810	ENSRNOG00000017873	ENSRNOG00000010406	ENSRNOG00000010935	ENSRNOG00000003031	ENSRNOG00000013628	ENSRNOG00000017725	ENSRNOG00000031385	ENSRNOG00000017908	ENSRNOG00000055103	ENSRNOG00000021150	ENSRNOG00000058337	ENSRNOG00000007982	ENSRNOG00000061304	ENSRNOG00000013387	ENSRNOG00000042954	ENSRNOG00000021619	ENSRNOG00000030269	ENSRNOG00000011582	ENSRNOG00000033529	ENSRNOG00000013203	ENSRNOG00000016798	ENSRNOG00000025889	ENSRNOG00000036877	ENSRNOG00000050519	ENSRNOG00000020401	ENSRNOG00000014776	ENSRNOG00000030019	ENSRNOG00000003164	ENSRNOG00000014621	ENSRNOG00000012176	ENSRNOG00000016826
Autophagy - animal	ENSRNOG00000002079	ENSRNOG00000026267	ENSRNOG00000019629	ENSRNOG00000007756	ENSRNOG00000002791	ENSRNOG00000002094	ENSRNOG00000007051	ENSRNOG00000020513	ENSRNOG00000011470	ENSRNOG00000060708	ENSRNOG00000016346	ENSRNOG00000050960	ENSRNOG00000038076	ENSRNOG00000010331	ENSRNOG00000004328	ENSRNOG00000057078	ENSRNOG00000021497	ENSRNOG00000005389	ENSRNOG00000003919	ENSRNOG00000009338	ENSRNOG00000016846	ENSRNOG00000017422	ENSRNOG00000007486	ENSRNOG00000017840	ENSRNOG00000016342	ENSRNOG00000003821	ENSRNOG00000038437	ENSRNOG00000005801	ENSRNOG00000059880	ENSRNOG00000001309	ENSRNOG00000018198	ENSRNOG00000012864	ENSRNOG00000000641	ENSRNOG00000023079	ENSRNOG00000017913	ENSRNOG00000050535	ENSRNOG00000018677	ENSRNOG00000007706	ENSRNOG00000000157	ENSRNOG00000018225	ENSRNOG00000012247	ENSRNOG00000018446	ENSRNOG00000000145	ENSRNOG00000007120	ENSRNOG00000033345	ENSRNOG00000002763	ENSRNOG00000007331	ENSRNOG00000058908	ENSRNOG00000011429
Taste transduction	ENSRNOG00000052795	ENSRNOG00000002953	ENSRNOG00000000774	ENSRNOG00000010803	ENSRNOG00000005664	ENSRNOG00000037036	ENSRNOG00000030993	ENSRNOG00000030752	ENSRNOG00000028135	ENSRNOG00000031185	ENSRNOG00000033896	ENSRNOG00000004890	ENSRNOG00000005018	ENSRNOG00000021445	ENSRNOG00000052310	ENSRNOG00000032448	ENSRNOG00000003512	ENSRNOG00000017881	ENSRNOG00000012038	ENSRNOG00000031107	ENSRNOG00000017842	ENSRNOG00000021799	ENSRNOG00000024685	ENSRNOG00000029561	ENSRNOG00000014232	ENSRNOG00000019368	ENSRNOG00000014290	ENSRNOG00000002349	ENSRNOG00000005268	ENSRNOG00000031836	ENSRNOG00000054212	ENSRNOG00000020401	ENSRNOG00000021329	ENSRNOG00000021366	ENSRNOG00000026817	ENSRNOG00000013042	ENSRNOG00000002336	ENSRNOG00000021430	ENSRNOG00000007090	ENSRNOG00000053213	ENSRNOG00000005717	ENSRNOG00000020484	ENSRNOG00000039350	ENSRNOG00000012591	ENSRNOG00000010254	ENSRNOG00000006595	ENSRNOG00000000716	ENSRNOG00000006639	ENSRNOG00000005645
Human cytomegalovirus infection	ENSRNOG00000017801	ENSRNOG00000000485	ENSRNOG00000052795	ENSRNOG00000049590	ENSRNOG00000014269	ENSRNOG00000000513	ENSRNOG00000000515	ENSRNOG00000043210	ENSRNOG00000000763	ENSRNOG00000049768	ENSRNOG00000002978	ENSRNOG00000029273	ENSRNOG00000000457	ENSRNOG00000048951	ENSRNOG00000000455	ENSRNOG00000031090	ENSRNOG00000000837	ENSRNOG00000050998	ENSRNOG00000000723	ENSRNOG00000050183	ENSRNOG00000039744	ENSRNOG00000031607	ENSRNOG00000061639	ENSRNOG00000010906	ENSRNOG00000001068	ENSRNOG00000011205	ENSRNOG00000011406	ENSRNOG00000012582	ENSRNOG00000001235	ENSRNOG00000029001	ENSRNOG00000029386	ENSRNOG00000049115	ENSRNOG00000045924	ENSRNOG00000000795	ENSRNOG00000042905	ENSRNOG00000032596	ENSRNOG00000000787	ENSRNOG00000000777	ENSRNOG00000004500	ENSRNOG00000000431	ENSRNOG00000033136	ENSRNOG00000060412	ENSRNOG00000047035	ENSRNOG00000040052	ENSRNOG00000022107	ENSRNOG00000059770	ENSRNOG00000047706	ENSRNOG00000030712	ENSRNOG00000038999
Gastric acid secretion	ENSRNOG00000006096	ENSRNOG00000052795	ENSRNOG00000049768	ENSRNOG00000002934	ENSRNOG00000020532	ENSRNOG00000014740	ENSRNOG00000004720	ENSRNOG00000004060	ENSRNOG00000009783	ENSRNOG00000002215	ENSRNOG00000004890	ENSRNOG00000021789	ENSRNOG00000016770	ENSRNOG00000001656	ENSRNOG00000002793	ENSRNOG00000004713	ENSRNOG00000004810	ENSRNOG00000011589	ENSRNOG00000019465	ENSRNOG00000017546	ENSRNOG00000029811	ENSRNOG00000055103	ENSRNOG00000021150	ENSRNOG00000008235	ENSRNOG00000058337	ENSRNOG00000007982	ENSRNOG00000003813	ENSRNOG00000053452	ENSRNOG00000049124	ENSRNOG00000057096	ENSRNOG00000025889	ENSRNOG00000020401	ENSRNOG00000052080	ENSRNOG00000014776	ENSRNOG00000030019	ENSRNOG00000002653	ENSRNOG00000031955	ENSRNOG00000003491	ENSRNOG00000020263	ENSRNOG00000018260	ENSRNOG00000016592	ENSRNOG00000032150	ENSRNOG00000038202	ENSRNOG00000007290	ENSRNOG00000020985	ENSRNOG00000053339	ENSRNOG00000002229	ENSRNOG00000001804	ENSRNOG00000036701
GnRH secretion	ENSRNOG00000043451	ENSRNOG00000052795	ENSRNOG00000005343	ENSRNOG00000000774	ENSRNOG00000047481	ENSRNOG00000011954	ENSRNOG00000021497	ENSRNOG00000009338	ENSRNOG00000016846	ENSRNOG00000054902	ENSRNOG00000019440	ENSRNOG00000004810	ENSRNOG00000001287	ENSRNOG00000023079	ENSRNOG00000027233	ENSRNOG00000018677	ENSRNOG00000033893	ENSRNOG00000021150	ENSRNOG00000058337	ENSRNOG00000008831	ENSRNOG00000029264	ENSRNOG00000000145	ENSRNOG00000013147	ENSRNOG00000007645	ENSRNOG00000056810	ENSRNOG00000020444	ENSRNOG00000023622	ENSRNOG00000056371	ENSRNOG00000001849	ENSRNOG00000047040	ENSRNOG00000055382	ENSRNOG00000005369	ENSRNOG00000016384	ENSRNOG00000060528	ENSRNOG00000018903	ENSRNOG00000003491	ENSRNOG00000010348	ENSRNOG00000020005	ENSRNOG00000007090	ENSRNOG00000013441	ENSRNOG00000019308	ENSRNOG00000016611	ENSRNOG00000010153	ENSRNOG00000053339	ENSRNOG00000001804	ENSRNOG00000051569	ENSRNOG00000046231	ENSRNOG00000028629	ENSRNOG00000001658
Cardiac muscle contraction	ENSRNOG00000034234	ENSRNOG00000030371	ENSRNOG00000030700	ENSRNOG00000031766	ENSRNOG00000016660	ENSRNOG00000012609	ENSRNOG00000002934	ENSRNOG00000007445	ENSRNOG00000054689	ENSRNOG00000017817	ENSRNOG00000004518	ENSRNOG00000059061	ENSRNOG00000033531	ENSRNOG00000021177	ENSRNOG00000018943	ENSRNOG00000018816	ENSRNOG00000018184	ENSRNOG00000004526	ENSRNOG00000038616	ENSRNOG00000016952	ENSRNOG00000032134	ENSRNOG00000034161	ENSRNOG00000018281	ENSRNOG00000057852	ENSRNOG00000012550	ENSRNOG00000003262	ENSRNOG00000032602	ENSRNOG00000018378	ENSRNOG00000042903	ENSRNOG00000018250	ENSRNOG00000003245	ENSRNOG00000057953	ENSRNOG00000016243	ENSRNOG00000007982	ENSRNOG00000004150	ENSRNOG00000013147	ENSRNOG00000048174	ENSRNOG00000001170	ENSRNOG00000047364	ENSRNOG00000056257	ENSRNOG00000024309	ENSRNOG00000001492	ENSRNOG00000015835	ENSRNOG00000012362	ENSRNOG00000030019	ENSRNOG00000008479	ENSRNOG00000008031	ENSRNOG00000012457	ENSRNOG00000026875
MAPK signaling pathway - fly	ENSRNOG00000002079	ENSRNOG00000000513	ENSRNOG00000000515	ENSRNOG00000001068	ENSRNOG00000028630	ENSRNOG00000017671	ENSRNOG00000015143	ENSRNOG00000005389	ENSRNOG00000009338	ENSRNOG00000003686	ENSRNOG00000060335	ENSRNOG00000003834	ENSRNOG00000006984	ENSRNOG00000017395	ENSRNOG00000016054	ENSRNOG00000009495	ENSRNOG00000010945	ENSRNOG00000010427	ENSRNOG00000033348	ENSRNOG00000020657	ENSRNOG00000020155	ENSRNOG00000008195	ENSRNOG00000004826	ENSRNOG00000017427	ENSRNOG00000019048	ENSRNOG00000010957	ENSRNOG00000029497	ENSRNOG00000008941	ENSRNOG00000017419	ENSRNOG00000000543	ENSRNOG00000001849	ENSRNOG00000002823	ENSRNOG00000009694	ENSRNOG00000034016	ENSRNOG00000003975	ENSRNOG00000037360	ENSRNOG00000012422	ENSRNOG00000014048	ENSRNOG00000015701	ENSRNOG00000026293	ENSRNOG00000051650	ENSRNOG00000002278	ENSRNOG00000047756	ENSRNOG00000011216	ENSRNOG00000047752	ENSRNOG00000016289	ENSRNOG00000007106	ENSRNOG00000001047	ENSRNOG00000001893
Oxidative phosphorylation	ENSRNOG00000030644	ENSRNOG00000031033	ENSRNOG00000034234	ENSRNOG00000030371	ENSRNOG00000033299	ENSRNOG00000031979	ENSRNOG00000030700	ENSRNOG00000033615	ENSRNOG00000031053	ENSRNOG00000029707	ENSRNOG00000029971	ENSRNOG00000029042	ENSRNOG00000031766	ENSRNOG00000052226	ENSRNOG00000016660	ENSRNOG00000052096	ENSRNOG00000023387	ENSRNOG00000012091	ENSRNOG00000049394	ENSRNOG00000000840	ENSRNOG00000017235	ENSRNOG00000001992	ENSRNOG00000027049	ENSRNOG00000062245	ENSRNOG00000054689	ENSRNOG00000016000	ENSRNOG00000046299	ENSRNOG00000017817	ENSRNOG00000030862	ENSRNOG00000020602	ENSRNOG00000059061	ENSRNOG00000021177	ENSRNOG00000051860	ENSRNOG00000020685	ENSRNOG00000017097	ENSRNOG00000018816	ENSRNOG00000013428	ENSRNOG00000006542	ENSRNOG00000027593	ENSRNOG00000004526	ENSRNOG00000038218	ENSRNOG00000040005	ENSRNOG00000011905	ENSRNOG00000008218	ENSRNOG00000038616	ENSRNOG00000001991	ENSRNOG00000017571	ENSRNOG00000016952	ENSRNOG00000021688
Prolactin signaling pathway	ENSRNOG00000002079	ENSRNOG00000000513	ENSRNOG00000000515	ENSRNOG00000000299	ENSRNOG00000019358	ENSRNOG00000005343	ENSRNOG00000016307	ENSRNOG00000039075	ENSRNOG00000047649	ENSRNOG00000030888	ENSRNOG00000021497	ENSRNOG00000008144	ENSRNOG00000008282	ENSRNOG00000061527	ENSRNOG00000017185	ENSRNOG00000039326	ENSRNOG00000009338	ENSRNOG00000016846	ENSRNOG00000019496	ENSRNOG00000019742	ENSRNOG00000017203	ENSRNOG00000017089	ENSRNOG00000006984	ENSRNOG00000059968	ENSRNOG00000023079	ENSRNOG00000016463	ENSRNOG00000009495	ENSRNOG00000016436	ENSRNOG00000002946	ENSRNOG00000018677	ENSRNOG00000039058	ENSRNOG00000017007	ENSRNOG00000020657	ENSRNOG00000020410	ENSRNOG00000000145	ENSRNOG00000019075	ENSRNOG00000002833	ENSRNOG00000020155	ENSRNOG00000014766	ENSRNOG00000004826	ENSRNOG00000056810	ENSRNOG00000014079	ENSRNOG00000023622	ENSRNOG00000008030	ENSRNOG00000056371	ENSRNOG00000001849	ENSRNOG00000002823	ENSRNOG00000037360	ENSRNOG00000047040
Pyrimidine metabolism	ENSRNOG00000017105	ENSRNOG00000045752	ENSRNOG00000004296	ENSRNOG00000003917	ENSRNOG00000016475	ENSRNOG00000050277	ENSRNOG00000025454	ENSRNOG00000032394	ENSRNOG00000059680	ENSRNOG00000015283	ENSRNOG00000021552	ENSRNOG00000007427	ENSRNOG00000033206	ENSRNOG00000018982	ENSRNOG00000007221	ENSRNOG00000013215	ENSRNOG00000014574	ENSRNOG00000015749	ENSRNOG00000018904	ENSRNOG00000037688	ENSRNOG00000003332	ENSRNOG00000012853	ENSRNOG00000003296	ENSRNOG00000011467	ENSRNOG00000001797	ENSRNOG00000015063	ENSRNOG00000008450	ENSRNOG00000003239	ENSRNOG00000038258	ENSRNOG00000002693	ENSRNOG00000009982	ENSRNOG00000054286	ENSRNOG00000037225	ENSRNOG00000009963	ENSRNOG00000002671	ENSRNOG00000015677	ENSRNOG00000013110	ENSRNOG00000047314	ENSRNOG00000005981	ENSRNOG00000016321	ENSRNOG00000003650	ENSRNOG00000007775	ENSRNOG00000020721	ENSRNOG00000013791	ENSRNOG00000004298	ENSRNOG00000007690	ENSRNOG00000026474	ENSRNOG00000020179	ENSRNOG00000009239
Glycosylphosphatidylinositol(GPI)-anchor biosynthesis	ENSRNOG00000026497	ENSRNOG00000003070	ENSRNOG00000052134	ENSRNOG00000003554	ENSRNOG00000013388	ENSRNOG00000011366	ENSRNOG00000047082	ENSRNOG00000029280	ENSRNOG00000014866	ENSRNOG00000039850	ENSRNOG00000025181	ENSRNOG00000047384	ENSRNOG00000017702	ENSRNOG00000050374	ENSRNOG00000010914	ENSRNOG00000007735	ENSRNOG00000014690	ENSRNOG00000049895	ENSRNOG00000009930	ENSRNOG00000020140	ENSRNOG00000042359	ENSRNOG00000033623	ENSRNOG00000000121	ENSRNOG00000015325	ENSRNOG00000059622	ENSRNOG00000027857	ENSRNOG00000049110
Autophagy - other eukaryotes	ENSRNOG00000026267	ENSRNOG00000007756	ENSRNOG00000002094	ENSRNOG00000020513	ENSRNOG00000050960	ENSRNOG00000038076	ENSRNOG00000005389	ENSRNOG00000007486	ENSRNOG00000017840	ENSRNOG00000016342	ENSRNOG00000003821	ENSRNOG00000017913	ENSRNOG00000000157	ENSRNOG00000033345	ENSRNOG00000002763	ENSRNOG00000008125	ENSRNOG00000008767	ENSRNOG00000003827	ENSRNOG00000019425	ENSRNOG00000047625	ENSRNOG00000027547	ENSRNOG00000001893	ENSRNOG00000001114	ENSRNOG00000009615	ENSRNOG00000060707	ENSRNOG00000009667	ENSRNOG00000018403	ENSRNOG00000000322	ENSRNOG00000015182	ENSRNOG00000023449	ENSRNOG00000018975	ENSRNOG00000016984	ENSRNOG00000013669	ENSRNOG00000004519	ENSRNOG00000017417	ENSRNOG00000053362
SNARE interactions in vesicular transport	ENSRNOG00000003971	ENSRNOG00000003071	ENSRNOG00000003402	ENSRNOG00000030055	ENSRNOG00000018673	ENSRNOG00000042786	ENSRNOG00000011008	ENSRNOG00000050552	ENSRNOG00000005801	ENSRNOG00000029165	ENSRNOG00000006989	ENSRNOG00000016619	ENSRNOG00000014785	ENSRNOG00000019193	ENSRNOG00000031283	ENSRNOG00000048248	ENSRNOG00000003506	ENSRNOG00000018847	ENSRNOG00000014902	ENSRNOG00000013165	ENSRNOG00000001867	ENSRNOG00000019219	ENSRNOG00000021013	ENSRNOG00000015670	ENSRNOG00000003849	ENSRNOG00000012659	ENSRNOG00000019302	ENSRNOG00000012748	ENSRNOG00000060436	ENSRNOG00000006139	ENSRNOG00000005281	ENSRNOG00000020753	ENSRNOG00000000936	ENSRNOG00000008372
Longevity regulating pathway - worm	ENSRNOG00000028746	ENSRNOG00000012801	ENSRNOG00000049964	ENSRNOG00000017801	ENSRNOG00000002079	ENSRNOG00000000513	ENSRNOG00000000515	ENSRNOG00000029986	ENSRNOG00000051196	ENSRNOG00000000299	ENSRNOG00000013176	ENSRNOG00000032858	ENSRNOG00000054519	ENSRNOG00000013484	ENSRNOG00000033402	ENSRNOG00000003084	ENSRNOG00000021497	ENSRNOG00000024755	ENSRNOG00000019017	ENSRNOG00000003919	ENSRNOG00000016846	ENSRNOG00000019058	ENSRNOG00000060939	ENSRNOG00000006984	ENSRNOG00000004437	ENSRNOG00000049504	ENSRNOG00000059133	ENSRNOG00000010945	ENSRNOG00000018677	ENSRNOG00000005861	ENSRNOG00000047294	ENSRNOG00000056033	ENSRNOG00000019525	ENSRNOG00000038300	ENSRNOG00000055015	ENSRNOG00000051592	ENSRNOG00000019221	ENSRNOG00000033345	ENSRNOG00000002763	ENSRNOG00000020155	ENSRNOG00000008195	ENSRNOG00000032554	ENSRNOG00000056810	ENSRNOG00000057494	ENSRNOG00000019048	ENSRNOG00000029726	ENSRNOG00000023622	ENSRNOG00000034030	ENSRNOG00000056371
Fatty acid degradation	ENSRNOG00000013975	ENSRNOG00000020623	ENSRNOG00000045947	ENSRNOG00000012966	ENSRNOG00000012443	ENSRNOG00000001344	ENSRNOG00000002342	ENSRNOG00000011497	ENSRNOG00000009597	ENSRNOG00000013766	ENSRNOG00000010697	ENSRNOG00000008755	ENSRNOG00000001177	ENSRNOG00000008843	ENSRNOG00000010633	ENSRNOG00000001770	ENSRNOG00000020624	ENSRNOG00000003307	ENSRNOG00000008842	ENSRNOG00000047549	ENSRNOG00000024629	ENSRNOG00000046357	ENSRNOG00000016265	ENSRNOG00000008474	ENSRNOG00000018522	ENSRNOG00000030154	ENSRNOG00000026745	ENSRNOG00000011381	ENSRNOG00000009845	ENSRNOG00000026163	ENSRNOG00000010438	ENSRNOG00000009741	ENSRNOG00000014254	ENSRNOG00000012436	ENSRNOG00000032959	ENSRNOG00000004027	ENSRNOG00000019180	ENSRNOG00000010800	ENSRNOG00000014718	ENSRNOG00000019189	ENSRNOG00000029549	ENSRNOG00000014645	ENSRNOG00000047565	ENSRNOG00000018114	ENSRNOG00000032908	ENSRNOG00000007862
Long-term potentiation	ENSRNOG00000017801	ENSRNOG00000052795	ENSRNOG00000043210	ENSRNOG00000004060	ENSRNOG00000009783	ENSRNOG00000004890	ENSRNOG00000009338	ENSRNOG00000016770	ENSRNOG00000007048	ENSRNOG00000018708	ENSRNOG00000004810	ENSRNOG00000011589	ENSRNOG00000023079	ENSRNOG00000021150	ENSRNOG00000014290	ENSRNOG00000058337	ENSRNOG00000010957	ENSRNOG00000000190	ENSRNOG00000009745	ENSRNOG00000001849	ENSRNOG00000052080	ENSRNOG00000003280	ENSRNOG00000008766	ENSRNOG00000031955	ENSRNOG00000003491	ENSRNOG00000021063	ENSRNOG00000036827	ENSRNOG00000020005	ENSRNOG00000042411	ENSRNOG00000007090	ENSRNOG00000016611	ENSRNOG00000002592	ENSRNOG00000038202	ENSRNOG00000005368	ENSRNOG00000054782	ENSRNOG00000010153	ENSRNOG00000053339	ENSRNOG00000010838	ENSRNOG00000054204	ENSRNOG00000059961	ENSRNOG00000016429	ENSRNOG00000001804	ENSRNOG00000013194	ENSRNOG00000007104	ENSRNOG00000033942	ENSRNOG00000006632	ENSRNOG00000005257	ENSRNOG00000032463	ENSRNOG00000001269
Carbon metabolism	ENSRNOG00000038085	ENSRNOG00000013704	ENSRNOG00000013975	ENSRNOG00000057367	ENSRNOG00000024128	ENSRNOG00000000925	ENSRNOG00000038473	ENSRNOG00000023150	ENSRNOG00000058249	ENSRNOG00000052455	ENSRNOG00000016064	ENSRNOG00000023960	ENSRNOG00000001391	ENSRNOG00000001388	ENSRNOG00000005686	ENSRNOG00000028557	ENSRNOG00000013141	ENSRNOG00000017481	ENSRNOG00000028958	ENSRNOG00000050630	ENSRNOG00000061527	ENSRNOG00000023547	ENSRNOG00000015020	ENSRNOG00000018630	ENSRNOG00000007949	ENSRNOG00000042542	ENSRNOG00000050214	ENSRNOG00000017597	ENSRNOG00000013532	ENSRNOG00000058719	ENSRNOG00000050843	ENSRNOG00000009994	ENSRNOG00000017637	ENSRNOG00000060262	ENSRNOG00000047948	ENSRNOG00000045720	ENSRNOG00000048704	ENSRNOG00000059579	ENSRNOG00000047276	ENSRNOG00000018326	ENSRNOG00000013971	ENSRNOG00000009536	ENSRNOG00000055572	ENSRNOG00000056728	ENSRNOG00000023856	ENSRNOG00000030224	ENSRNOG00000011329	ENSRNOG00000052802	ENSRNOG00000007102
Dorso-ventral axis formation	ENSRNOG00000018835	ENSRNOG00000061764	ENSRNOG00000009338	ENSRNOG00000004826	ENSRNOG00000010957	ENSRNOG00000008941	ENSRNOG00000001849	ENSRNOG00000037360	ENSRNOG00000033169	ENSRNOG00000009871	ENSRNOG00000005043	ENSRNOG00000009043	ENSRNOG00000007106	ENSRNOG00000020689	ENSRNOG00000004332	ENSRNOG00000003990	ENSRNOG00000005984	ENSRNOG00000019161	ENSRNOG00000010176	ENSRNOG00000000934	ENSRNOG00000053583	ENSRNOG00000019322
Proximal tubule bicarbonate reclamation	ENSRNOG00000057367	ENSRNOG00000002934	ENSRNOG00000011648	ENSRNOG00000015159	ENSRNOG00000028616	ENSRNOG00000031612	ENSRNOG00000030019	ENSRNOG00000020263	ENSRNOG00000016469	ENSRNOG00000007290	ENSRNOG00000018536	ENSRNOG00000009629	ENSRNOG00000036693	ENSRNOG00000032378	ENSRNOG00000008103	ENSRNOG00000011227	ENSRNOG00000011501	ENSRNOG00000016827	ENSRNOG00000056246	ENSRNOG00000003134	ENSRNOG00000007059	ENSRNOG00000002916
Notch signaling pathway	ENSRNOG00000019338	ENSRNOG00000000442	ENSRNOG00000018835	ENSRNOG00000005879	ENSRNOG00000001250	ENSRNOG00000009110	ENSRNOG00000004346	ENSRNOG00000019423	ENSRNOG00000007443	ENSRNOG00000005428	ENSRNOG00000020941	ENSRNOG00000001720	ENSRNOG00000017915	ENSRNOG00000060694	ENSRNOG00000011593	ENSRNOG00000000604	ENSRNOG00000005129	ENSRNOG00000023400	ENSRNOG00000011871	ENSRNOG00000000190	ENSRNOG00000018719	ENSRNOG00000050298	ENSRNOG00000015318	ENSRNOG00000026295	ENSRNOG00000007797	ENSRNOG00000005355	ENSRNOG00000020867	ENSRNOG00000013364	ENSRNOG00000023816	ENSRNOG00000017326	ENSRNOG00000027295	ENSRNOG00000042581	ENSRNOG00000009653	ENSRNOG00000037133	ENSRNOG00000016998	ENSRNOG00000018364	ENSRNOG00000008133	ENSRNOG00000009568	ENSRNOG00000050848	ENSRNOG00000014011	ENSRNOG00000001004	ENSRNOG00000003268	ENSRNOG00000038766	ENSRNOG00000002879	ENSRNOG00000021086	ENSRNOG00000046327	ENSRNOG00000001432	ENSRNOG00000013695	ENSRNOG00000001708
N-Glycan biosynthesis	ENSRNOG00000017434	ENSRNOG00000005753	ENSRNOG00000001823	ENSRNOG00000017087	ENSRNOG00000004149	ENSRNOG00000019724	ENSRNOG00000010877	ENSRNOG00000016989	ENSRNOG00000009090	ENSRNOG00000003695	ENSRNOG00000046515	ENSRNOG00000004234	ENSRNOG00000002883	ENSRNOG00000011528	ENSRNOG00000029077	ENSRNOG00000012841	ENSRNOG00000008451	ENSRNOG00000007492	ENSRNOG00000001712	ENSRNOG00000014511	ENSRNOG00000012055	ENSRNOG00000011922	ENSRNOG00000000800	ENSRNOG00000009799	ENSRNOG00000012292	ENSRNOG00000046345	ENSRNOG00000006369	ENSRNOG00000018276	ENSRNOG00000031896	ENSRNOG00000059461	ENSRNOG00000009045	ENSRNOG00000049403	ENSRNOG00000013061	ENSRNOG00000015226	ENSRNOG00000017663	ENSRNOG00000004591	ENSRNOG00000031208	ENSRNOG00000024954	ENSRNOG00000015439	ENSRNOG00000003235	ENSRNOG00000054176	ENSRNOG00000015079	ENSRNOG00000010993	ENSRNOG00000008648	ENSRNOG00000003614	ENSRNOG00000002216	ENSRNOG00000019609	ENSRNOG00000049110	ENSRNOG00000058694
Nitrogen metabolism	ENSRNOG00000013704	ENSRNOG00000057367	ENSRNOG00000037983	ENSRNOG00000017073	ENSRNOG00000023162	ENSRNOG00000017766	ENSRNOG00000049560	ENSRNOG00000019098	ENSRNOG00000021323	ENSRNOG00000010079	ENSRNOG00000012371	ENSRNOG00000009629	ENSRNOG00000005669	ENSRNOG00000010698	ENSRNOG00000057036	ENSRNOG00000021355	ENSRNOG00000002916	ENSRNOG00000029330
Endometrial cancer	ENSRNOG00000000485	ENSRNOG00000051964	ENSRNOG00000000299	ENSRNOG00000004500	ENSRNOG00000014753	ENSRNOG00000012944	ENSRNOG00000000373	ENSRNOG00000000378	ENSRNOG00000021497	ENSRNOG00000009338	ENSRNOG00000016846	ENSRNOG00000033791	ENSRNOG00000023079	ENSRNOG00000054121	ENSRNOG00000018677	ENSRNOG00000013993	ENSRNOG00000013090	ENSRNOG00000000145	ENSRNOG00000006450	ENSRNOG00000002833	ENSRNOG00000004826	ENSRNOG00000056810	ENSRNOG00000010957	ENSRNOG00000020876	ENSRNOG00000023622	ENSRNOG00000056371	ENSRNOG00000001849	ENSRNOG00000037360	ENSRNOG00000016384	ENSRNOG00000014071	ENSRNOG00000010171	ENSRNOG00000005872	ENSRNOG00000049232	ENSRNOG00000018903	ENSRNOG00000060626	ENSRNOG00000006136	ENSRNOG00000020005	ENSRNOG00000016611	ENSRNOG00000019822	ENSRNOG00000010153	ENSRNOG00000010838	ENSRNOG00000005796	ENSRNOG00000020918	ENSRNOG00000007106	ENSRNOG00000046657	ENSRNOG00000028629	ENSRNOG00000020151	ENSRNOG00000053979	ENSRNOG00000004332
Citrate cycle (TCA cycle)	ENSRNOG00000024128	ENSRNOG00000005686	ENSRNOG00000017481	ENSRNOG00000015020	ENSRNOG00000009994	ENSRNOG00000045720	ENSRNOG00000055572	ENSRNOG00000001440	ENSRNOG00000022980	ENSRNOG00000005061	ENSRNOG00000028616	ENSRNOG00000016223	ENSRNOG00000005130	ENSRNOG00000014745	ENSRNOG00000019372	ENSRNOG00000005849	ENSRNOG00000005587	ENSRNOG00000003163	ENSRNOG00000018536	ENSRNOG00000016924	ENSRNOG00000007967	ENSRNOG00000019955	ENSRNOG00000003653	ENSRNOG00000023520	ENSRNOG00000008103	ENSRNOG00000013949	ENSRNOG00000025383	ENSRNOG00000007895	ENSRNOG00000010277	ENSRNOG00000006364	ENSRNOG00000007316	ENSRNOG00000013331
Glyoxylate and dicarboxylate metabolism	ENSRNOG00000013975	ENSRNOG00000024128	ENSRNOG00000012794	ENSRNOG00000050214	ENSRNOG00000050843	ENSRNOG00000037518	ENSRNOG00000009536	ENSRNOG00000023856	ENSRNOG00000007102	ENSRNOG00000001440	ENSRNOG00000008106	ENSRNOG00000050205	ENSRNOG00000019470	ENSRNOG00000057042	ENSRNOG00000049560	ENSRNOG00000005275	ENSRNOG00000005849	ENSRNOG00000018755	ENSRNOG00000008364	ENSRNOG00000015869	ENSRNOG00000023520	ENSRNOG00000008103	ENSRNOG00000011599	ENSRNOG00000004601	ENSRNOG00000046307	ENSRNOG00000006364	ENSRNOG00000019189	ENSRNOG00000029501	ENSRNOG00000055383	ENSRNOG00000051496	ENSRNOG00000016327	ENSRNOG00000007862	ENSRNOG00000011535
Mitophagy - animal	ENSRNOG00000017801	ENSRNOG00000002079	ENSRNOG00000000299	ENSRNOG00000000847	ENSRNOG00000020513	ENSRNOG00000060708	ENSRNOG00000038076	ENSRNOG00000030888	ENSRNOG00000008658	ENSRNOG00000014666	ENSRNOG00000009338	ENSRNOG00000017422	ENSRNOG00000054620	ENSRNOG00000023079	ENSRNOG00000009495	ENSRNOG00000012247	ENSRNOG00000033345	ENSRNOG00000020155	ENSRNOG00000012258	ENSRNOG00000009605	ENSRNOG00000008393	ENSRNOG00000017243	ENSRNOG00000002823	ENSRNOG00000043114	ENSRNOG00000009820	ENSRNOG00000004093	ENSRNOG00000026293	ENSRNOG00000055547	ENSRNOG00000019425	ENSRNOG00000016611	ENSRNOG00000007946	ENSRNOG00000014060	ENSRNOG00000046424	ENSRNOG00000005528	ENSRNOG00000028556	ENSRNOG00000056940	ENSRNOG00000020191	ENSRNOG00000027547	ENSRNOG00000046657	ENSRNOG00000003889	ENSRNOG00000003147	ENSRNOG00000014084	ENSRNOG00000030665	ENSRNOG00000011057	ENSRNOG00000037247	ENSRNOG00000011933	ENSRNOG00000016708	ENSRNOG00000020730	ENSRNOG00000000322
Propanoate metabolism	ENSRNOG00000013975	ENSRNOG00000013009	ENSRNOG00000005686	ENSRNOG00000028557	ENSRNOG00000034013	ENSRNOG00000017481	ENSRNOG00000050843	ENSRNOG00000000658	ENSRNOG00000013000	ENSRNOG00000002636	ENSRNOG00000007102	ENSRNOG00000008755	ENSRNOG00000001177	ENSRNOG00000001770	ENSRNOG00000011419	ENSRNOG00000057042	ENSRNOG00000009928	ENSRNOG00000024629	ENSRNOG00000020607	ENSRNOG00000005587	ENSRNOG00000014522	ENSRNOG00000013103	ENSRNOG00000018755	ENSRNOG00000008474	ENSRNOG00000018522	ENSRNOG00000004448	ENSRNOG00000015869	ENSRNOG00000011622	ENSRNOG00000006364	ENSRNOG00000019189	ENSRNOG00000015029	ENSRNOG00000047565	ENSRNOG00000016327	ENSRNOG00000007862
Porphyrin and chlorophyll metabolism	ENSRNOG00000015206	ENSRNOG00000001980	ENSRNOG00000046540	ENSRNOG00000001990	ENSRNOG00000012294	ENSRNOG00000000167	ENSRNOG00000056596	ENSRNOG00000018053	ENSRNOG00000049426	ENSRNOG00000001654	ENSRNOG00000003567	ENSRNOG00000011778	ENSRNOG00000018211	ENSRNOG00000017230	ENSRNOG00000001973	ENSRNOG00000000913	ENSRNOG00000042714	ENSRNOG00000010390	ENSRNOG00000025910	ENSRNOG00000015213	ENSRNOG00000017810	ENSRNOG00000024410	ENSRNOG00000024972	ENSRNOG00000002393	ENSRNOG00000025353	ENSRNOG00000003773	ENSRNOG00000014117	ENSRNOG00000018740	ENSRNOG00000011913
Thyroid cancer	ENSRNOG00000000485	ENSRNOG00000000464	ENSRNOG00000013953	ENSRNOG00000004500	ENSRNOG00000002394	ENSRNOG00000014753	ENSRNOG00000009338	ENSRNOG00000023079	ENSRNOG00000013993	ENSRNOG00000013090	ENSRNOG00000026203	ENSRNOG00000010957	ENSRNOG00000020876	ENSRNOG00000001849	ENSRNOG00000014071	ENSRNOG00000005872	ENSRNOG00000049232	ENSRNOG00000060626	ENSRNOG00000020005	ENSRNOG00000016611	ENSRNOG00000019822	ENSRNOG00000017441	ENSRNOG00000020918	ENSRNOG00000046657	ENSRNOG00000020151	ENSRNOG00000030665	ENSRNOG00000005615	ENSRNOG00000004537	ENSRNOG00000024019	ENSRNOG00000008839	ENSRNOG00000010176	ENSRNOG00000014751	ENSRNOG00000009446	ENSRNOG00000001633	ENSRNOG00000053583	ENSRNOG00000010121	ENSRNOG00000000521	ENSRNOG00000054172	ENSRNOG00000010756	ENSRNOG00000019768
Fatty acid elongation	ENSRNOG00000032508	ENSRNOG00000000435	ENSRNOG00000028448	ENSRNOG00000038761	ENSRNOG00000021808	ENSRNOG00000006331	ENSRNOG00000005772	ENSRNOG00000019124	ENSRNOG00000009630	ENSRNOG00000010450	ENSRNOG00000013766	ENSRNOG00000010697	ENSRNOG00000055221	ENSRNOG00000053460	ENSRNOG00000024629	ENSRNOG00000009773	ENSRNOG00000012616	ENSRNOG00000018522	ENSRNOG00000043445	ENSRNOG00000010468	ENSRNOG00000030232	ENSRNOG00000020829	ENSRNOG00000043192	ENSRNOG00000010800	ENSRNOG00000048949	ENSRNOG00000046864	ENSRNOG00000010134	ENSRNOG00000014702	ENSRNOG00000028047	ENSRNOG00000047565	ENSRNOG00000010580
Long-term depression	ENSRNOG00000052795	ENSRNOG00000029876	ENSRNOG00000001235	ENSRNOG00000005389	ENSRNOG00000009338	ENSRNOG00000001313	ENSRNOG00000004810	ENSRNOG00000023079	ENSRNOG00000019465	ENSRNOG00000012060	ENSRNOG00000021150	ENSRNOG00000014290	ENSRNOG00000058337	ENSRNOG00000026764	ENSRNOG00000008180	ENSRNOG00000012703	ENSRNOG00000037231	ENSRNOG00000010957	ENSRNOG00000001130	ENSRNOG00000057096	ENSRNOG00000001849	ENSRNOG00000025889	ENSRNOG00000011282	ENSRNOG00000020557	ENSRNOG00000003491	ENSRNOG00000019482	ENSRNOG00000016592	ENSRNOG00000009440	ENSRNOG00000020005	ENSRNOG00000036745	ENSRNOG00000016611	ENSRNOG00000010153	ENSRNOG00000053339	ENSRNOG00000010922	ENSRNOG00000010838	ENSRNOG00000054204	ENSRNOG00000024904	ENSRNOG00000001804	ENSRNOG00000014187	ENSRNOG00000002657	ENSRNOG00000008135	ENSRNOG00000047374	ENSRNOG00000001893	ENSRNOG00000055486	ENSRNOG00000007104	ENSRNOG00000006174	ENSRNOG00000012235	ENSRNOG00000002361	ENSRNOG00000012061
Sphingolipid metabolism	ENSRNOG00000062030	ENSRNOG00000005175	ENSRNOG00000032942	ENSRNOG00000002781	ENSRNOG00000017022	ENSRNOG00000003223	ENSRNOG00000037695	ENSRNOG00000051904	ENSRNOG00000012536	ENSRNOG00000016364	ENSRNOG00000015644	ENSRNOG00000001072	ENSRNOG00000001875	ENSRNOG00000008116	ENSRNOG00000036866	ENSRNOG00000018106	ENSRNOG00000042041	ENSRNOG00000003759	ENSRNOG00000012196	ENSRNOG00000012953	ENSRNOG00000011284	ENSRNOG00000011716	ENSRNOG00000007637	ENSRNOG00000021032	ENSRNOG00000000177	ENSRNOG00000047026	ENSRNOG00000049281	ENSRNOG00000017977	ENSRNOG00000000306	ENSRNOG00000010196	ENSRNOG00000011513	ENSRNOG00000021138	ENSRNOG00000015895	ENSRNOG00000010882	ENSRNOG00000016962	ENSRNOG00000009345	ENSRNOG00000003601	ENSRNOG00000047368	ENSRNOG00000004443	ENSRNOG00000012210	ENSRNOG00000009980	ENSRNOG00000010626	ENSRNOG00000050163	ENSRNOG00000024595	ENSRNOG00000000257	ENSRNOG00000019031	ENSRNOG00000052990	ENSRNOG00000000565	ENSRNOG00000013823
Thiamine metabolism	ENSRNOG00000012761	ENSRNOG00000058652	ENSRNOG00000030020	ENSRNOG00000046947	ENSRNOG00000029922	ENSRNOG00000042889	ENSRNOG00000019922	ENSRNOG00000055714	ENSRNOG00000018105	ENSRNOG00000033672	ENSRNOG00000045686	ENSRNOG00000049056	ENSRNOG00000045738	ENSRNOG00000000122	ENSRNOG00000013954	ENSRNOG00000005260	ENSRNOG00000019736
Alzheimer disease	ENSRNOG00000030644	ENSRNOG00000031033	ENSRNOG00000034234	ENSRNOG00000030371	ENSRNOG00000033299	ENSRNOG00000031979	ENSRNOG00000030700	ENSRNOG00000033615	ENSRNOG00000031053	ENSRNOG00000029707	ENSRNOG00000029971	ENSRNOG00000029042	ENSRNOG00000031766	ENSRNOG00000017801	ENSRNOG00000039980	ENSRNOG00000052795	ENSRNOG00000002079	ENSRNOG00000052226	ENSRNOG00000016660	ENSRNOG00000043210	ENSRNOG00000029986	ENSRNOG00000033133	ENSRNOG00000005133	ENSRNOG00000023387	ENSRNOG00000007756	ENSRNOG00000049394	ENSRNOG00000038398	ENSRNOG00000061216	ENSRNOG00000000837	ENSRNOG00000062245	ENSRNOG00000000439	ENSRNOG00000011572	ENSRNOG00000000847	ENSRNOG00000047035	ENSRNOG00000017209	ENSRNOG00000021547	ENSRNOG00000020513	ENSRNOG00000054689	ENSRNOG00000016000	ENSRNOG00000046299	ENSRNOG00000004060	ENSRNOG00000002525	ENSRNOG00000017817	ENSRNOG00000020602	ENSRNOG00000018101	ENSRNOG00000061031	ENSRNOG00000004680	ENSRNOG00000023960	ENSRNOG00000010830
Legionellosis	ENSRNOG00000045654	ENSRNOG00000000837	ENSRNOG00000047966	ENSRNOG00000050647	ENSRNOG00000018673	ENSRNOG00000007372	ENSRNOG00000020075	ENSRNOG00000030888	ENSRNOG00000012944	ENSRNOG00000050510	ENSRNOG00000005810	ENSRNOG00000056216	ENSRNOG00000014531	ENSRNOG00000010278	ENSRNOG00000008022	ENSRNOG00000009848	ENSRNOG00000061099	ENSRNOG00000022067	ENSRNOG00000004820	ENSRNOG00000060229	ENSRNOG00000012331	ENSRNOG00000013634	ENSRNOG00000057494	ENSRNOG00000017243	ENSRNOG00000033693	ENSRNOG00000034093	ENSRNOG00000004380	ENSRNOG00000056855	ENSRNOG00000033559	ENSRNOG00000012477	ENSRNOG00000046834	ENSRNOG00000014525	ENSRNOG00000001224	ENSRNOG00000008193	ENSRNOG00000002792	ENSRNOG00000009468	ENSRNOG00000017819	ENSRNOG00000019675	ENSRNOG00000033924	ENSRNOG00000055156	ENSRNOG00000032585	ENSRNOG00000023258	ENSRNOG00000032885	ENSRNOG00000029996	ENSRNOG00000004992	ENSRNOG00000009439	ENSRNOG00000025768	ENSRNOG00000010522	ENSRNOG00000003714
Biosynthesis of amino acids	ENSRNOG00000038085	ENSRNOG00000013704	ENSRNOG00000024128	ENSRNOG00000008837	ENSRNOG00000000925	ENSRNOG00000038473	ENSRNOG00000058249	ENSRNOG00000052455	ENSRNOG00000016064	ENSRNOG00000023960	ENSRNOG00000001391	ENSRNOG00000001388	ENSRNOG00000013141	ENSRNOG00000028958	ENSRNOG00000050630	ENSRNOG00000023547	ENSRNOG00000015020	ENSRNOG00000018630	ENSRNOG00000042542	ENSRNOG00000013532	ENSRNOG00000058719	ENSRNOG00000045615	ENSRNOG00000007546	ENSRNOG00000060262	ENSRNOG00000047948	ENSRNOG00000020956	ENSRNOG00000045720	ENSRNOG00000048704	ENSRNOG00000059579	ENSRNOG00000047276	ENSRNOG00000013971	ENSRNOG00000055572	ENSRNOG00000020879	ENSRNOG00000030224	ENSRNOG00000011329	ENSRNOG00000053811	ENSRNOG00000052802	ENSRNOG00000018310	ENSRNOG00000000903	ENSRNOG00000038610	ENSRNOG00000008106	ENSRNOG00000011189	ENSRNOG00000001512	ENSRNOG00000020420	ENSRNOG00000057942	ENSRNOG00000048365	ENSRNOG00000017895	ENSRNOG00000050669	ENSRNOG00000030638
Adipocytokine signaling pathway	ENSRNOG00000002079	ENSRNOG00000000464	ENSRNOG00000000837	ENSRNOG00000005906	ENSRNOG00000043176	ENSRNOG00000040108	ENSRNOG00000023664	ENSRNOG00000051171	ENSRNOG00000045947	ENSRNOG00000030888	ENSRNOG00000039001	ENSRNOG00000021497	ENSRNOG00000020063	ENSRNOG00000019742	ENSRNOG00000004143	ENSRNOG00000001309	ENSRNOG00000059968	ENSRNOG00000001142	ENSRNOG00000000658	ENSRNOG00000002946	ENSRNOG00000018677	ENSRNOG00000007706	ENSRNOG00000022485	ENSRNOG00000020155	ENSRNOG00000004473	ENSRNOG00000014287	ENSRNOG00000017226	ENSRNOG00000002823	ENSRNOG00000028616	ENSRNOG00000010633	ENSRNOG00000009768	ENSRNOG00000050620	ENSRNOG00000047549	ENSRNOG00000020902	ENSRNOG00000007284	ENSRNOG00000018536	ENSRNOG00000001389	ENSRNOG00000055156	ENSRNOG00000021463	ENSRNOG00000023258	ENSRNOG00000016265	ENSRNOG00000028629	ENSRNOG00000012686	ENSRNOG00000026745	ENSRNOG00000011381	ENSRNOG00000009615	ENSRNOG00000060936	ENSRNOG00000001821	ENSRNOG00000006238
Primary bile acid biosynthesis	ENSRNOG00000010519	ENSRNOG00000019141	ENSRNOG00000013004	ENSRNOG00000015187	ENSRNOG00000019080	ENSRNOG00000056688	ENSRNOG00000009730	ENSRNOG00000019626	ENSRNOG00000007147	ENSRNOG00000007395	ENSRNOG00000018662	ENSRNOG00000051912	ENSRNOG00000011413	ENSRNOG00000015840	ENSRNOG00000017188	ENSRNOG00000007378	ENSRNOG00000009488	ENSRNOG00000019481
Vitamin digestion and absorption	ENSRNOG00000003030	ENSRNOG00000002839	ENSRNOG00000029047	ENSRNOG00000012178	ENSRNOG00000057978	ENSRNOG00000005132	ENSRNOG00000013770	ENSRNOG00000017725	ENSRNOG00000010291	ENSRNOG00000057628	ENSRNOG00000005542	ENSRNOG00000055909	ENSRNOG00000000981	ENSRNOG00000045679	ENSRNOG00000057256	ENSRNOG00000001232	ENSRNOG00000061695	ENSRNOG00000025608	ENSRNOG00000021001	ENSRNOG00000026037	ENSRNOG00000013932	ENSRNOG00000017233	ENSRNOG00000026919	ENSRNOG00000022305	ENSRNOG00000004280	ENSRNOG00000019656
Protein digestion and absorption	ENSRNOG00000016057	ENSRNOG00000000463	ENSRNOG00000014851	ENSRNOG00000002934	ENSRNOG00000020532	ENSRNOG00000045612	ENSRNOG00000020579	ENSRNOG00000024824	ENSRNOG00000010630	ENSRNOG00000012110	ENSRNOG00000033618	ENSRNOG00000049345	ENSRNOG00000028092	ENSRNOG00000026501	ENSRNOG00000017054	ENSRNOG00000023148	ENSRNOG00000001469	ENSRNOG00000050119	ENSRNOG00000015948	ENSRNOG00000011598	ENSRNOG00000019440	ENSRNOG00000060381	ENSRNOG00000020525	ENSRNOG00000018951	ENSRNOG00000010935	ENSRNOG00000013628	ENSRNOG00000030763	ENSRNOG00000054945	ENSRNOG00000031385	ENSRNOG00000031782	ENSRNOG00000014816	ENSRNOG00000015159	ENSRNOG00000021619	ENSRNOG00000001492	ENSRNOG00000013203	ENSRNOG00000015365	ENSRNOG00000007006	ENSRNOG00000000552	ENSRNOG00000030019	ENSRNOG00000008479	ENSRNOG00000020263	ENSRNOG00000011292	ENSRNOG00000019353	ENSRNOG00000010663	ENSRNOG00000016469	ENSRNOG00000014143	ENSRNOG00000016281	ENSRNOG00000018487	ENSRNOG00000039197
Terpenoid backbone biosynthesis	ENSRNOG00000013975	ENSRNOG00000016690	ENSRNOG00000012054	ENSRNOG00000013376	ENSRNOG00000054189	ENSRNOG00000014462	ENSRNOG00000016704	ENSRNOG00000014665	ENSRNOG00000048661	ENSRNOG00000016552	ENSRNOG00000049604	ENSRNOG00000060132	ENSRNOG00000048849	ENSRNOG00000016122	ENSRNOG00000016767	ENSRNOG00000046403	ENSRNOG00000010953	ENSRNOG00000045919	ENSRNOG00000019468	ENSRNOG00000020696	ENSRNOG00000042962	ENSRNOG00000007660	ENSRNOG00000019120	ENSRNOG00000019189	ENSRNOG00000043377	ENSRNOG00000046404	ENSRNOG00000007862	ENSRNOG00000000411
2-Oxocarboxylic acid metabolism	ENSRNOG00000024128	ENSRNOG00000038473	ENSRNOG00000011861	ENSRNOG00000015020	ENSRNOG00000020956	ENSRNOG00000045720	ENSRNOG00000059579	ENSRNOG00000055572	ENSRNOG00000020879	ENSRNOG00000011189	ENSRNOG00000005849	ENSRNOG00000015514	ENSRNOG00000016356	ENSRNOG00000023520	ENSRNOG00000013949	ENSRNOG00000010277	ENSRNOG00000011782	ENSRNOG00000033915	ENSRNOG00000007316
Type II diabetes mellitus	ENSRNOG00000002079	ENSRNOG00000029986	ENSRNOG00000000837	ENSRNOG00000007668	ENSRNOG00000016346	ENSRNOG00000061527	ENSRNOG00000016846	ENSRNOG00000004560	ENSRNOG00000015603	ENSRNOG00000002946	ENSRNOG00000047276	ENSRNOG00000000145	ENSRNOG00000013147	ENSRNOG00000011329	ENSRNOG00000020155	ENSRNOG00000056810	ENSRNOG00000006116	ENSRNOG00000046891	ENSRNOG00000023622	ENSRNOG00000017226	ENSRNOG00000056371	ENSRNOG00000001849	ENSRNOG00000002823	ENSRNOG00000020420	ENSRNOG00000016384	ENSRNOG00000060528	ENSRNOG00000060463	ENSRNOG00000018903	ENSRNOG00000002863	ENSRNOG00000008965	ENSRNOG00000015480	ENSRNOG00000007090	ENSRNOG00000020405	ENSRNOG00000001389	ENSRNOG00000055156	ENSRNOG00000011875	ENSRNOG00000021128	ENSRNOG00000009615	ENSRNOG00000001821	ENSRNOG00000046458	ENSRNOG00000023509	ENSRNOG00000019228	ENSRNOG00000012052	ENSRNOG00000014597	ENSRNOG00000019073	ENSRNOG00000011377	ENSRNOG00000053583	ENSRNOG00000002568	ENSRNOG00000052707
Insulin signaling pathway	ENSRNOG00000019730	ENSRNOG00000019634	ENSRNOG00000002079	ENSRNOG00000029986	ENSRNOG00000000920	ENSRNOG00000052343	ENSRNOG00000000826	ENSRNOG00000012582	ENSRNOG00000003063	ENSRNOG00000051171	ENSRNOG00000004060	ENSRNOG00000011470	ENSRNOG00000001982	ENSRNOG00000034013	ENSRNOG00000021497	ENSRNOG00000061527	ENSRNOG00000003919	ENSRNOG00000009338	ENSRNOG00000016770	ENSRNOG00000016846	ENSRNOG00000003821	ENSRNOG00000014316	ENSRNOG00000018708	ENSRNOG00000007583	ENSRNOG00000017597	ENSRNOG00000018725	ENSRNOG00000023079	ENSRNOG00000045636	ENSRNOG00000014904	ENSRNOG00000001142	ENSRNOG00000000658	ENSRNOG00000017637	ENSRNOG00000002946	ENSRNOG00000018677	ENSRNOG00000007706	ENSRNOG00000025792	ENSRNOG00000001868	ENSRNOG00000019977	ENSRNOG00000020284	ENSRNOG00000020657	ENSRNOG00000001425	ENSRNOG00000000145	ENSRNOG00000009079	ENSRNOG00000002833	ENSRNOG00000055524	ENSRNOG00000020155	ENSRNOG00000004826	ENSRNOG00000004473	ENSRNOG00000056810
Longevity regulating pathway - multiple species	ENSRNOG00000029986	ENSRNOG00000000299	ENSRNOG00000049768	ENSRNOG00000045654	ENSRNOG00000047966	ENSRNOG00000050647	ENSRNOG00000004890	ENSRNOG00000021497	ENSRNOG00000003919	ENSRNOG00000009338	ENSRNOG00000016846	ENSRNOG00000003821	ENSRNOG00000019693	ENSRNOG00000023079	ENSRNOG00000001142	ENSRNOG00000018677	ENSRNOG00000061099	ENSRNOG00000007706	ENSRNOG00000051592	ENSRNOG00000000145	ENSRNOG00000000604	ENSRNOG00000056810	ENSRNOG00000019048	ENSRNOG00000023622	ENSRNOG00000056371	ENSRNOG00000020289	ENSRNOG00000020401	ENSRNOG00000034093	ENSRNOG00000014776	ENSRNOG00000016384	ENSRNOG00000018903	ENSRNOG00000013397	ENSRNOG00000032150	ENSRNOG00000016611	ENSRNOG00000020405	ENSRNOG00000002115	ENSRNOG00000001389	ENSRNOG00000002229	ENSRNOG00000032585	ENSRNOG00000014187	ENSRNOG00000013133	ENSRNOG00000003999	ENSRNOG00000054757	ENSRNOG00000028629	ENSRNOG00000008364	ENSRNOG00000005257	ENSRNOG00000009615	ENSRNOG00000009568	ENSRNOG00000059479
Renal cell carcinoma	ENSRNOG00000051063	ENSRNOG00000019883	ENSRNOG00000001068	ENSRNOG00000021497	ENSRNOG00000009338	ENSRNOG00000016846	ENSRNOG00000007048	ENSRNOG00000014316	ENSRNOG00000052745	ENSRNOG00000021318	ENSRNOG00000023079	ENSRNOG00000007925	ENSRNOG00000013017	ENSRNOG00000018677	ENSRNOG00000004814	ENSRNOG00000019598	ENSRNOG00000025792	ENSRNOG00000013536	ENSRNOG00000001868	ENSRNOG00000005053	ENSRNOG00000000145	ENSRNOG00000038276	ENSRNOG00000004826	ENSRNOG00000056810	ENSRNOG00000009605	ENSRNOG00000010957	ENSRNOG00000023622	ENSRNOG00000008941	ENSRNOG00000000190	ENSRNOG00000056371	ENSRNOG00000001849	ENSRNOG00000020652	ENSRNOG00000037360	ENSRNOG00000016384	ENSRNOG00000031730	ENSRNOG00000018903	ENSRNOG00000046568	ENSRNOG00000004676	ENSRNOG00000015292	ENSRNOG00000026293	ENSRNOG00000007803	ENSRNOG00000020005	ENSRNOG00000058914	ENSRNOG00000016611	ENSRNOG00000010153	ENSRNOG00000007284	ENSRNOG00000010838	ENSRNOG00000016182	ENSRNOG00000029784
Retrograde endocannabinoid signaling	ENSRNOG00000030644	ENSRNOG00000031033	ENSRNOG00000033615	ENSRNOG00000031053	ENSRNOG00000029707	ENSRNOG00000029971	ENSRNOG00000029042	ENSRNOG00000052795	ENSRNOG00000002079	ENSRNOG00000052226	ENSRNOG00000000513	ENSRNOG00000000515	ENSRNOG00000023387	ENSRNOG00000049394	ENSRNOG00000049768	ENSRNOG00000020650	ENSRNOG00000016147	ENSRNOG00000060599	ENSRNOG00000010803	ENSRNOG00000014862	ENSRNOG00000001079	ENSRNOG00000007581	ENSRNOG00000062245	ENSRNOG00000002525	ENSRNOG00000045949	ENSRNOG00000020602	ENSRNOG00000025040	ENSRNOG00000004890	ENSRNOG00000047914	ENSRNOG00000008223	ENSRNOG00000027593	ENSRNOG00000002327	ENSRNOG00000038218	ENSRNOG00000040005	ENSRNOG00000004560	ENSRNOG00000003512	ENSRNOG00000017571	ENSRNOG00000011000	ENSRNOG00000006984	ENSRNOG00000004810	ENSRNOG00000021688	ENSRNOG00000019465	ENSRNOG00000009155	ENSRNOG00000011949	ENSRNOG00000050469	ENSRNOG00000039562	ENSRNOG00000017446	ENSRNOG00000021150	ENSRNOG00000009364
Glucagon signaling pathway	ENSRNOG00000017801	ENSRNOG00000052795	ENSRNOG00000043210	ENSRNOG00000000920	ENSRNOG00000003063	ENSRNOG00000032858	ENSRNOG00000051171	ENSRNOG00000013009	ENSRNOG00000004060	ENSRNOG00000009783	ENSRNOG00000005413	ENSRNOG00000008622	ENSRNOG00000034013	ENSRNOG00000023493	ENSRNOG00000021497	ENSRNOG00000061527	ENSRNOG00000016770	ENSRNOG00000043498	ENSRNOG00000007583	ENSRNOG00000017597	ENSRNOG00000004810	ENSRNOG00000013532	ENSRNOG00000018725	ENSRNOG00000011589	ENSRNOG00000001142	ENSRNOG00000000658	ENSRNOG00000017637	ENSRNOG00000018677	ENSRNOG00000007706	ENSRNOG00000047276	ENSRNOG00000021150	ENSRNOG00000013000	ENSRNOG00000058337	ENSRNOG00000051592	ENSRNOG00000019813	ENSRNOG00000011329	ENSRNOG00000012826	ENSRNOG00000004473	ENSRNOG00000000165	ENSRNOG00000000190	ENSRNOG00000009745	ENSRNOG00000025889	ENSRNOG00000028616	ENSRNOG00000052080	ENSRNOG00000031955	ENSRNOG00000050620	ENSRNOG00000011417	ENSRNOG00000016452	ENSRNOG00000013397
Folate biosynthesis	ENSRNOG00000049911	ENSRNOG00000049693	ENSRNOG00000047848	ENSRNOG00000009513	ENSRNOG00000015113	ENSRNOG00000013521	ENSRNOG00000027433	ENSRNOG00000038361	ENSRNOG00000056325	ENSRNOG00000009734	ENSRNOG00000058652	ENSRNOG00000011039	ENSRNOG00000021735	ENSRNOG00000030020	ENSRNOG00000003880	ENSRNOG00000020410	ENSRNOG00000047796	ENSRNOG00000028235	ENSRNOG00000009875	ENSRNOG00000042889	ENSRNOG00000017672	ENSRNOG00000000566	ENSRNOG00000007351	ENSRNOG00000011784	ENSRNOG00000009250	ENSRNOG00000011672	ENSRNOG00000033672	ENSRNOG00000028366	ENSRNOG00000015455	ENSRNOG00000050780	ENSRNOG00000004302	ENSRNOG00000003253	ENSRNOG00000013954
alpha-Linolenic acid metabolism	ENSRNOG00000057470	ENSRNOG00000026764	ENSRNOG00000008755	ENSRNOG00000037231	ENSRNOG00000016798	ENSRNOG00000021206	ENSRNOG00000012295	ENSRNOG00000003164	ENSRNOG00000016826	ENSRNOG00000001153	ENSRNOG00000024904	ENSRNOG00000002657	ENSRNOG00000008135	ENSRNOG00000008474	ENSRNOG00000020440	ENSRNOG00000025121	ENSRNOG00000026037	ENSRNOG00000016838	ENSRNOG00000046619	ENSRNOG00000016945	ENSRNOG00000016647	ENSRNOG00000007447	ENSRNOG00000032908
GABAergic synapse	ENSRNOG00000049768	ENSRNOG00000060599	ENSRNOG00000000774	ENSRNOG00000010803	ENSRNOG00000014862	ENSRNOG00000025040	ENSRNOG00000004890	ENSRNOG00000018111	ENSRNOG00000047914	ENSRNOG00000002327	ENSRNOG00000004560	ENSRNOG00000005697	ENSRNOG00000003512	ENSRNOG00000013547	ENSRNOG00000019465	ENSRNOG00000009495	ENSRNOG00000027767	ENSRNOG00000014819	ENSRNOG00000050469	ENSRNOG00000039562	ENSRNOG00000047799	ENSRNOG00000032659	ENSRNOG00000013147	ENSRNOG00000016701	ENSRNOG00000033345	ENSRNOG00000002349	ENSRNOG00000003680	ENSRNOG00000002636	ENSRNOG00000006527	ENSRNOG00000057096	ENSRNOG00000020401	ENSRNOG00000014776	ENSRNOG00000038205	ENSRNOG00000048980	ENSRNOG00000031612	ENSRNOG00000002336	ENSRNOG00000003491	ENSRNOG00000019482	ENSRNOG00000003241	ENSRNOG00000016592	ENSRNOG00000010348	ENSRNOG00000032417	ENSRNOG00000032150	ENSRNOG00000007090	ENSRNOG00000049560	ENSRNOG00000019425	ENSRNOG00000050231	ENSRNOG00000039350	ENSRNOG00000005291
Biosynthesis of unsaturated fatty acids	ENSRNOG00000032508	ENSRNOG00000028448	ENSRNOG00000038761	ENSRNOG00000021808	ENSRNOG00000006331	ENSRNOG00000005772	ENSRNOG00000019124	ENSRNOG00000009630	ENSRNOG00000010450	ENSRNOG00000032554	ENSRNOG00000008755	ENSRNOG00000055221	ENSRNOG00000020480	ENSRNOG00000056688	ENSRNOG00000053460	ENSRNOG00000007395	ENSRNOG00000013552	ENSRNOG00000051912	ENSRNOG00000009773	ENSRNOG00000008474	ENSRNOG00000020440	ENSRNOG00000011413	ENSRNOG00000013279	ENSRNOG00000010468	ENSRNOG00000030232	ENSRNOG00000043192	ENSRNOG00000015840	ENSRNOG00000046005	ENSRNOG00000048949	ENSRNOG00000046864	ENSRNOG00000010134	ENSRNOG00000014702	ENSRNOG00000010580	ENSRNOG00000032908
Glycerophospholipid metabolism	ENSRNOG00000025012	ENSRNOG00000002338	ENSRNOG00000012358	ENSRNOG00000059295	ENSRNOG00000028368	ENSRNOG00000039323	ENSRNOG00000000437	ENSRNOG00000017731	ENSRNOG00000018077	ENSRNOG00000001205	ENSRNOG00000015912	ENSRNOG00000028566	ENSRNOG00000000977	ENSRNOG00000016791	ENSRNOG00000018319	ENSRNOG00000002949	ENSRNOG00000057470	ENSRNOG00000055849	ENSRNOG00000004402	ENSRNOG00000021273	ENSRNOG00000019573	ENSRNOG00000030771	ENSRNOG00000008116	ENSRNOG00000017930	ENSRNOG00000019466	ENSRNOG00000024144	ENSRNOG00000026764	ENSRNOG00000016643	ENSRNOG00000058271	ENSRNOG00000008320	ENSRNOG00000052600	ENSRNOG00000014876	ENSRNOG00000001796	ENSRNOG00000037231	ENSRNOG00000011404	ENSRNOG00000033824	ENSRNOG00000022308	ENSRNOG00000016798	ENSRNOG00000002142	ENSRNOG00000021206	ENSRNOG00000020424	ENSRNOG00000012295	ENSRNOG00000061050	ENSRNOG00000003164	ENSRNOG00000050841	ENSRNOG00000016826	ENSRNOG00000001153	ENSRNOG00000010067	ENSRNOG00000000177
Longevity regulating pathway - mammal	ENSRNOG00000017801	ENSRNOG00000019634	ENSRNOG00000029986	ENSRNOG00000000299	ENSRNOG00000007756	ENSRNOG00000052343	ENSRNOG00000030630	ENSRNOG00000049768	ENSRNOG00000012582	ENSRNOG00000000431	ENSRNOG00000011470	ENSRNOG00000030888	ENSRNOG00000008173	ENSRNOG00000005413	ENSRNOG00000008622	ENSRNOG00000004890	ENSRNOG00000023493	ENSRNOG00000021497	ENSRNOG00000003919	ENSRNOG00000009338	ENSRNOG00000016846	ENSRNOG00000003821	ENSRNOG00000004143	ENSRNOG00000001309	ENSRNOG00000023079	ENSRNOG00000001142	ENSRNOG00000018677	ENSRNOG00000007706	ENSRNOG00000051592	ENSRNOG00000000145	ENSRNOG00000012826	ENSRNOG00000004473	ENSRNOG00000056810	ENSRNOG00000014287	ENSRNOG00000019048	ENSRNOG00000020876	ENSRNOG00000023622	ENSRNOG00000056371	ENSRNOG00000020289	ENSRNOG00000042785	ENSRNOG00000020401	ENSRNOG00000014776	ENSRNOG00000016384	ENSRNOG00000013574	ENSRNOG00000007242	ENSRNOG00000018903	ENSRNOG00000016452	ENSRNOG00000013397	ENSRNOG00000006833
Hepatocellular carcinoma	ENSRNOG00000028746	ENSRNOG00000012801	ENSRNOG00000017030	ENSRNOG00000049964	ENSRNOG00000000485	ENSRNOG00000010676	ENSRNOG00000029273	ENSRNOG00000004500	ENSRNOG00000013484	ENSRNOG00000001408	ENSRNOG00000033402	ENSRNOG00000006137	ENSRNOG00000061031	ENSRNOG00000009271	ENSRNOG00000014753	ENSRNOG00000010557	ENSRNOG00000021497	ENSRNOG00000017409	ENSRNOG00000051905	ENSRNOG00000024755	ENSRNOG00000019017	ENSRNOG00000003919	ENSRNOG00000009338	ENSRNOG00000016846	ENSRNOG00000017106	ENSRNOG00000019058	ENSRNOG00000033791	ENSRNOG00000015618	ENSRNOG00000008168	ENSRNOG00000020804	ENSRNOG00000014385	ENSRNOG00000060939	ENSRNOG00000018377	ENSRNOG00000019423	ENSRNOG00000004660	ENSRNOG00000016029	ENSRNOG00000052745	ENSRNOG00000028227	ENSRNOG00000061238	ENSRNOG00000016119	ENSRNOG00000003807	ENSRNOG00000025327	ENSRNOG00000023079	ENSRNOG00000061818	ENSRNOG00000015982	ENSRNOG00000018677	ENSRNOG00000047741	ENSRNOG00000009088	ENSRNOG00000038300
Dopaminergic synapse	ENSRNOG00000017801	ENSRNOG00000052795	ENSRNOG00000002079	ENSRNOG00000000513	ENSRNOG00000000515	ENSRNOG00000060806	ENSRNOG00000000431	ENSRNOG00000004060	ENSRNOG00000004680	ENSRNOG00000009783	ENSRNOG00000025040	ENSRNOG00000005413	ENSRNOG00000008622	ENSRNOG00000023493	ENSRNOG00000021497	ENSRNOG00000005389	ENSRNOG00000047914	ENSRNOG00000016770	ENSRNOG00000014448	ENSRNOG00000004560	ENSRNOG00000018708	ENSRNOG00000006984	ENSRNOG00000004810	ENSRNOG00000011589	ENSRNOG00000019465	ENSRNOG00000018677	ENSRNOG00000050469	ENSRNOG00000039562	ENSRNOG00000053122	ENSRNOG00000021150	ENSRNOG00000047799	ENSRNOG00000058337	ENSRNOG00000018337	ENSRNOG00000002175	ENSRNOG00000018851	ENSRNOG00000020410	ENSRNOG00000013147	ENSRNOG00000011158	ENSRNOG00000016701	ENSRNOG00000007645	ENSRNOG00000002833	ENSRNOG00000005338	ENSRNOG00000012826	ENSRNOG00000020155	ENSRNOG00000049270	ENSRNOG00000057096	ENSRNOG00000009745	ENSRNOG00000025889	ENSRNOG00000002823
Arginine and proline metabolism	ENSRNOG00000020623	ENSRNOG00000038473	ENSRNOG00000010872	ENSRNOG00000021255	ENSRNOG00000003289	ENSRNOG00000032432	ENSRNOG00000018603	ENSRNOG00000051507	ENSRNOG00000015591	ENSRNOG00000001344	ENSRNOG00000016807	ENSRNOG00000002342	ENSRNOG00000011497	ENSRNOG00000053811	ENSRNOG00000003809	ENSRNOG00000008575	ENSRNOG00000001130	ENSRNOG00000046379	ENSRNOG00000011714	ENSRNOG00000029778	ENSRNOG00000005424	ENSRNOG00000057578	ENSRNOG00000009348	ENSRNOG00000060047	ENSRNOG00000002848	ENSRNOG00000055450	ENSRNOG00000033663	ENSRNOG00000004503	ENSRNOG00000000585	ENSRNOG00000054724	ENSRNOG00000023612	ENSRNOG00000015267	ENSRNOG00000050655	ENSRNOG00000057443	ENSRNOG00000061876	ENSRNOG00000016837	ENSRNOG00000027739	ENSRNOG00000016356	ENSRNOG00000000281	ENSRNOG00000004027	ENSRNOG00000036682	ENSRNOG00000024577	ENSRNOG00000054962	ENSRNOG00000014573	ENSRNOG00000003267	ENSRNOG00000000168	ENSRNOG00000011782	ENSRNOG00000013304	ENSRNOG00000008714
Glutathione metabolism	ENSRNOG00000028746	ENSRNOG00000012801	ENSRNOG00000049964	ENSRNOG00000045752	ENSRNOG00000062276	ENSRNOG00000047697	ENSRNOG00000013604	ENSRNOG00000013484	ENSRNOG00000033402	ENSRNOG00000013409	ENSRNOG00000003289	ENSRNOG00000006583	ENSRNOG00000025454	ENSRNOG00000015210	ENSRNOG00000018441	ENSRNOG00000024755	ENSRNOG00000019017	ENSRNOG00000015020	ENSRNOG00000019058	ENSRNOG00000060939	ENSRNOG00000016484	ENSRNOG00000055672	ENSRNOG00000052564	ENSRNOG00000047507	ENSRNOG00000038300	ENSRNOG00000056962	ENSRNOG00000056728	ENSRNOG00000019221	ENSRNOG00000015799	ENSRNOG00000048812	ENSRNOG00000009751	ENSRNOG00000029726	ENSRNOG00000046379	ENSRNOG00000007743	ENSRNOG00000061857	ENSRNOG00000018237	ENSRNOG00000004245	ENSRNOG00000057180	ENSRNOG00000015763	ENSRNOG00000006302	ENSRNOG00000011781	ENSRNOG00000057086	ENSRNOG00000005424	ENSRNOG00000008090	ENSRNOG00000008450	ENSRNOG00000054286	ENSRNOG00000060749	ENSRNOG00000015851	ENSRNOG00000010461
Regulation of lipolysis in adipocyte	ENSRNOG00000029986	ENSRNOG00000049768	ENSRNOG00000012674	ENSRNOG00000003972	ENSRNOG00000002525	ENSRNOG00000003442	ENSRNOG00000015086	ENSRNOG00000004890	ENSRNOG00000021497	ENSRNOG00000016846	ENSRNOG00000010325	ENSRNOG00000007415	ENSRNOG00000019465	ENSRNOG00000018677	ENSRNOG00000014149	ENSRNOG00000000145	ENSRNOG00000056810	ENSRNOG00000000221	ENSRNOG00000023622	ENSRNOG00000057096	ENSRNOG00000056371	ENSRNOG00000025889	ENSRNOG00000021206	ENSRNOG00000020401	ENSRNOG00000014776	ENSRNOG00000016384	ENSRNOG00000009768	ENSRNOG00000018903	ENSRNOG00000011417	ENSRNOG00000011082	ENSRNOG00000009686	ENSRNOG00000008176	ENSRNOG00000016592	ENSRNOG00000032150	ENSRNOG00000014684	ENSRNOG00000014508	ENSRNOG00000020405	ENSRNOG00000018736	ENSRNOG00000019217	ENSRNOG00000001389	ENSRNOG00000002229	ENSRNOG00000010805	ENSRNOG00000003999	ENSRNOG00000047374	ENSRNOG00000054757	ENSRNOG00000047551	ENSRNOG00000028629	ENSRNOG00000005257	ENSRNOG00000009269
Vascular smooth muscle contraction	ENSRNOG00000052795	ENSRNOG00000029876	ENSRNOG00000049768	ENSRNOG00000001235	ENSRNOG00000020415	ENSRNOG00000004060	ENSRNOG00000010233	ENSRNOG00000016346	ENSRNOG00000028837	ENSRNOG00000002215	ENSRNOG00000004890	ENSRNOG00000021789	ENSRNOG00000016770	ENSRNOG00000012721	ENSRNOG00000005465	ENSRNOG00000018708	ENSRNOG00000057470	ENSRNOG00000004810	ENSRNOG00000015603	ENSRNOG00000007477	ENSRNOG00000012060	ENSRNOG00000017546	ENSRNOG00000021150	ENSRNOG00000015991	ENSRNOG00000008235	ENSRNOG00000058337	ENSRNOG00000004496	ENSRNOG00000026764	ENSRNOG00000009597	ENSRNOG00000013147	ENSRNOG00000020130	ENSRNOG00000004925	ENSRNOG00000009390	ENSRNOG00000042954	ENSRNOG00000060087	ENSRNOG00000049124	ENSRNOG00000037231	ENSRNOG00000010957	ENSRNOG00000016798	ENSRNOG00000008141	ENSRNOG00000001849	ENSRNOG00000025889	ENSRNOG00000018346	ENSRNOG00000050519	ENSRNOG00000020676	ENSRNOG00000020401	ENSRNOG00000012295	ENSRNOG00000014776	ENSRNOG00000008924
Nicotinate and nicotinamide metabolism	ENSRNOG00000019687	ENSRNOG00000054157	ENSRNOG00000015354	ENSRNOG00000027697	ENSRNOG00000062125	ENSRNOG00000014555	ENSRNOG00000004296	ENSRNOG00000016475	ENSRNOG00000020736	ENSRNOG00000026842	ENSRNOG00000003069	ENSRNOG00000013828	ENSRNOG00000042897	ENSRNOG00000015283	ENSRNOG00000016936	ENSRNOG00000003064	ENSRNOG00000006393	ENSRNOG00000007939	ENSRNOG00000016980	ENSRNOG00000051592	ENSRNOG00000022576	ENSRNOG00000017866	ENSRNOG00000003332	ENSRNOG00000033923	ENSRNOG00000015962	ENSRNOG00000009982	ENSRNOG00000005981	ENSRNOG00000003650	ENSRNOG00000013585	ENSRNOG00000013791	ENSRNOG00000020179	ENSRNOG00000012665	ENSRNOG00000005930	ENSRNOG00000020102	ENSRNOG00000011071	ENSRNOG00000001151	ENSRNOG00000036683	ENSRNOG00000013994	ENSRNOG00000009754	ENSRNOG00000019424
Chemical carcinogenesis	ENSRNOG00000028746	ENSRNOG00000012801	ENSRNOG00000040287	ENSRNOG00000049964	ENSRNOG00000049911	ENSRNOG00000049693	ENSRNOG00000047848	ENSRNOG00000001980	ENSRNOG00000046540	ENSRNOG00000001990	ENSRNOG00000000969	ENSRNOG00000024016	ENSRNOG00000049464	ENSRNOG00000002525	ENSRNOG00000013484	ENSRNOG00000033402	ENSRNOG00000049498	ENSRNOG00000006583	ENSRNOG00000019342	ENSRNOG00000031529	ENSRNOG00000046643	ENSRNOG00000024755	ENSRNOG00000019017	ENSRNOG00000019058	ENSRNOG00000001466	ENSRNOG00000060939	ENSRNOG00000016484	ENSRNOG00000017872	ENSRNOG00000013291	ENSRNOG00000033680	ENSRNOG00000038300	ENSRNOG00000014055	ENSRNOG00000032560	ENSRNOG00000020775	ENSRNOG00000019221	ENSRNOG00000003515	ENSRNOG00000012458	ENSRNOG00000052810	ENSRNOG00000029726	ENSRNOG00000046080	ENSRNOG00000021405	ENSRNOG00000007743	ENSRNOG00000016173	ENSRNOG00000061857	ENSRNOG00000018237	ENSRNOG00000004245	ENSRNOG00000020801	ENSRNOG00000001973	ENSRNOG00000021924
MAPK signaling pathway	ENSRNOG00000017285	ENSRNOG00000017801	ENSRNOG00000002079	ENSRNOG00000000513	ENSRNOG00000000515	ENSRNOG00000043210	ENSRNOG00000029986	ENSRNOG00000005133	ENSRNOG00000051964	ENSRNOG00000013953	ENSRNOG00000029148	ENSRNOG00000007607	ENSRNOG00000020618	ENSRNOG00000056212	ENSRNOG00000002978	ENSRNOG00000016810	ENSRNOG00000002227	ENSRNOG00000045654	ENSRNOG00000000837	ENSRNOG00000047966	ENSRNOG00000050647	ENSRNOG00000001068	ENSRNOG00000033134	ENSRNOG00000001235	ENSRNOG00000004500	ENSRNOG00000061530	ENSRNOG00000000477	ENSRNOG00000047907	ENSRNOG00000016907	ENSRNOG00000020899	ENSRNOG00000004518	ENSRNOG00000010789	ENSRNOG00000030888	ENSRNOG00000021248	ENSRNOG00000021117	ENSRNOG00000033531	ENSRNOG00000018461	ENSRNOG00000014832	ENSRNOG00000010695	ENSRNOG00000021497	ENSRNOG00000001312	ENSRNOG00000056151	ENSRNOG00000021581	ENSRNOG00000048172	ENSRNOG00000009338	ENSRNOG00000007048	ENSRNOG00000004560	ENSRNOG00000019964	ENSRNOG00000020505
HIF-1 signaling pathway	ENSRNOG00000019634	ENSRNOG00000029986	ENSRNOG00000051964	ENSRNOG00000051063	ENSRNOG00000052343	ENSRNOG00000002791	ENSRNOG00000012582	ENSRNOG00000058249	ENSRNOG00000013009	ENSRNOG00000023960	ENSRNOG00000030888	ENSRNOG00000009783	ENSRNOG00000013141	ENSRNOG00000021497	ENSRNOG00000028958	ENSRNOG00000050630	ENSRNOG00000003919	ENSRNOG00000016846	ENSRNOG00000023547	ENSRNOG00000019742	ENSRNOG00000018630	ENSRNOG00000010278	ENSRNOG00000010208	ENSRNOG00000042542	ENSRNOG00000058719	ENSRNOG00000011589	ENSRNOG00000016696	ENSRNOG00000018677	ENSRNOG00000047948	ENSRNOG00000004814	ENSRNOG00000048704	ENSRNOG00000019598	ENSRNOG00000005053	ENSRNOG00000013000	ENSRNOG00000007468	ENSRNOG00000030224	ENSRNOG00000000145	ENSRNOG00000005854	ENSRNOG00000006450	ENSRNOG00000051986	ENSRNOG00000038276	ENSRNOG00000052802	ENSRNOG00000056810	ENSRNOG00000006116	ENSRNOG00000046891	ENSRNOG00000018310	ENSRNOG00000038610	ENSRNOG00000023622	ENSRNOG00000000190
cGMP - PKG signaling pathway	ENSRNOG00000001479	ENSRNOG00000017801	ENSRNOG00000039980	ENSRNOG00000052795	ENSRNOG00000043210	ENSRNOG00000029876	ENSRNOG00000029986	ENSRNOG00000049768	ENSRNOG00000038398	ENSRNOG00000033134	ENSRNOG00000012674	ENSRNOG00000001235	ENSRNOG00000002934	ENSRNOG00000000431	ENSRNOG00000015788	ENSRNOG00000050743	ENSRNOG00000043375	ENSRNOG00000004060	ENSRNOG00000003442	ENSRNOG00000006324	ENSRNOG00000010830	ENSRNOG00000005413	ENSRNOG00000008622	ENSRNOG00000002215	ENSRNOG00000000413	ENSRNOG00000004890	ENSRNOG00000023493	ENSRNOG00000021497	ENSRNOG00000021789	ENSRNOG00000016770	ENSRNOG00000012721	ENSRNOG00000012175	ENSRNOG00000005465	ENSRNOG00000047300	ENSRNOG00000018708	ENSRNOG00000001478	ENSRNOG00000004810	ENSRNOG00000015603	ENSRNOG00000010997	ENSRNOG00000003031	ENSRNOG00000019465	ENSRNOG00000012060	ENSRNOG00000017546	ENSRNOG00000013463	ENSRNOG00000018677	ENSRNOG00000020400	ENSRNOG00000014443	ENSRNOG00000031773	ENSRNOG00000021150
Alanine, aspartate and glutamate metabolism	ENSRNOG00000013704	ENSRNOG00000057367	ENSRNOG00000008837	ENSRNOG00000038473	ENSRNOG00000019659	ENSRNOG00000000582	ENSRNOG00000043116	ENSRNOG00000017821	ENSRNOG00000018507	ENSRNOG00000007546	ENSRNOG00000013770	ENSRNOG00000059579	ENSRNOG00000023856	ENSRNOG00000002128	ENSRNOG00000002636	ENSRNOG00000020202	ENSRNOG00000000903	ENSRNOG00000036910	ENSRNOG00000031612	ENSRNOG00000008625	ENSRNOG00000049351	ENSRNOG00000049560	ENSRNOG00000020148	ENSRNOG00000023538	ENSRNOG00000004481	ENSRNOG00000018200	ENSRNOG00000000007	ENSRNOG00000061876	ENSRNOG00000016356	ENSRNOG00000002810	ENSRNOG00000026474	ENSRNOG00000023814	ENSRNOG00000046763	ENSRNOG00000007232	ENSRNOG00000011782	ENSRNOG00000056246	ENSRNOG00000033915	ENSRNOG00000027797	ENSRNOG00000018655
Vasopressin-regulated water reabsorption	ENSRNOG00000025791	ENSRNOG00000009797	ENSRNOG00000049768	ENSRNOG00000011302	ENSRNOG00000005413	ENSRNOG00000008622	ENSRNOG00000023493	ENSRNOG00000052174	ENSRNOG00000006989	ENSRNOG00000013254	ENSRNOG00000010048	ENSRNOG00000012826	ENSRNOG00000009700	ENSRNOG00000006130	ENSRNOG00000054378	ENSRNOG00000032070	ENSRNOG00000025889	ENSRNOG00000008921	ENSRNOG00000036688	ENSRNOG00000018048	ENSRNOG00000016452	ENSRNOG00000021229	ENSRNOG00000005809	ENSRNOG00000016043	ENSRNOG00000018568	ENSRNOG00000007648	ENSRNOG00000056662	ENSRNOG00000003905	ENSRNOG00000003999	ENSRNOG00000047374	ENSRNOG00000054757	ENSRNOG00000005257	ENSRNOG00000019302	ENSRNOG00000059862	ENSRNOG00000011222	ENSRNOG00000013412	ENSRNOG00000010434	ENSRNOG00000025481	ENSRNOG00000009781	ENSRNOG00000061035	ENSRNOG00000032202	ENSRNOG00000057056	ENSRNOG00000004978	ENSRNOG00000019298	ENSRNOG00000013038	ENSRNOG00000006178	ENSRNOG00000005151
AMPK signaling pathway	ENSRNOG00000029986	ENSRNOG00000000299	ENSRNOG00000005906	ENSRNOG00000043176	ENSRNOG00000040108	ENSRNOG00000012582	ENSRNOG00000018901	ENSRNOG00000023664	ENSRNOG00000051171	ENSRNOG00000011470	ENSRNOG00000005413	ENSRNOG00000008622	ENSRNOG00000034013	ENSRNOG00000047088	ENSRNOG00000023493	ENSRNOG00000021497	ENSRNOG00000005389	ENSRNOG00000003919	ENSRNOG00000016846	ENSRNOG00000003821	ENSRNOG00000004143	ENSRNOG00000001309	ENSRNOG00000017597	ENSRNOG00000045636	ENSRNOG00000001142	ENSRNOG00000000658	ENSRNOG00000017637	ENSRNOG00000018677	ENSRNOG00000007706	ENSRNOG00000055103	ENSRNOG00000002180	ENSRNOG00000051592	ENSRNOG00000018851	ENSRNOG00000000145	ENSRNOG00000011158	ENSRNOG00000012826	ENSRNOG00000004473	ENSRNOG00000008895	ENSRNOG00000032554	ENSRNOG00000056810	ENSRNOG00000014287	ENSRNOG00000000165	ENSRNOG00000049270	ENSRNOG00000023622	ENSRNOG00000017226	ENSRNOG00000056371	ENSRNOG00000020289	ENSRNOG00000011282	ENSRNOG00000028616
Endocrine and other factor-regulated calcium reabsorption	ENSRNOG00000049768	ENSRNOG00000061543	ENSRNOG00000019358	ENSRNOG00000026490	ENSRNOG00000002934	ENSRNOG00000011302	ENSRNOG00000047300	ENSRNOG00000004810	ENSRNOG00000003031	ENSRNOG00000047662	ENSRNOG00000021150	ENSRNOG00000055072	ENSRNOG00000058337	ENSRNOG00000061304	ENSRNOG00000001709	ENSRNOG00000045980	ENSRNOG00000030269	ENSRNOG00000029237	ENSRNOG00000019534	ENSRNOG00000046297	ENSRNOG00000033835	ENSRNOG00000001492	ENSRNOG00000046267	ENSRNOG00000025889	ENSRNOG00000033414	ENSRNOG00000015394	ENSRNOG00000046670	ENSRNOG00000026243	ENSRNOG00000030019	ENSRNOG00000008479	ENSRNOG00000003491	ENSRNOG00000020263	ENSRNOG00000016469	ENSRNOG00000015865	ENSRNOG00000007290	ENSRNOG00000004026	ENSRNOG00000007456	ENSRNOG00000004291	ENSRNOG00000048630	ENSRNOG00000017506	ENSRNOG00000029871	ENSRNOG00000047374	ENSRNOG00000054757	ENSRNOG00000005257	ENSRNOG00000032378	ENSRNOG00000011227	ENSRNOG00000012061	ENSRNOG00000033119	ENSRNOG00000014183
Gap junction	ENSRNOG00000052795	ENSRNOG00000029876	ENSRNOG00000051964	ENSRNOG00000029148	ENSRNOG00000049768	ENSRNOG00000061216	ENSRNOG00000017209	ENSRNOG00000047907	ENSRNOG00000018461	ENSRNOG00000010695	ENSRNOG00000004890	ENSRNOG00000001312	ENSRNOG00000009338	ENSRNOG00000004810	ENSRNOG00000023079	ENSRNOG00000019465	ENSRNOG00000009495	ENSRNOG00000012060	ENSRNOG00000048169	ENSRNOG00000021150	ENSRNOG00000014290	ENSRNOG00000058337	ENSRNOG00000036676	ENSRNOG00000002412	ENSRNOG00000004826	ENSRNOG00000017445	ENSRNOG00000057096	ENSRNOG00000001849	ENSRNOG00000025889	ENSRNOG00000015544	ENSRNOG00000017625	ENSRNOG00000020401	ENSRNOG00000037360	ENSRNOG00000002244	ENSRNOG00000014776	ENSRNOG00000008428	ENSRNOG00000003491	ENSRNOG00000016592	ENSRNOG00000009440	ENSRNOG00000020005	ENSRNOG00000032150	ENSRNOG00000016611	ENSRNOG00000010153	ENSRNOG00000053339	ENSRNOG00000014089	ENSRNOG00000021438	ENSRNOG00000031707	ENSRNOG00000016429	ENSRNOG00000002229
Ras signaling pathway	ENSRNOG00000000483	ENSRNOG00000047356	ENSRNOG00000002079	ENSRNOG00000029986	ENSRNOG00000051147	ENSRNOG00000000889	ENSRNOG00000051964	ENSRNOG00000013953	ENSRNOG00000029148	ENSRNOG00000019883	ENSRNOG00000020618	ENSRNOG00000056212	ENSRNOG00000013461	ENSRNOG00000060266	ENSRNOG00000002978	ENSRNOG00000045721	ENSRNOG00000002227	ENSRNOG00000001068	ENSRNOG00000033316	ENSRNOG00000028630	ENSRNOG00000017671	ENSRNOG00000061530	ENSRNOG00000018827	ENSRNOG00000000474	ENSRNOG00000004060	ENSRNOG00000050223	ENSRNOG00000049342	ENSRNOG00000014312	ENSRNOG00000046089	ENSRNOG00000049830	ENSRNOG00000047797	ENSRNOG00000049773	ENSRNOG00000020899	ENSRNOG00000046292	ENSRNOG00000002347	ENSRNOG00000030888	ENSRNOG00000005271	ENSRNOG00000025040	ENSRNOG00000018461	ENSRNOG00000010695	ENSRNOG00000021497	ENSRNOG00000001312	ENSRNOG00000056151	ENSRNOG00000033801	ENSRNOG00000046646	ENSRNOG00000048670	ENSRNOG00000048172	ENSRNOG00000009338	ENSRNOG00000047914
Amyotrophic lateral sclerosis (ALS)	ENSRNOG00000000513	ENSRNOG00000000515	ENSRNOG00000043210	ENSRNOG00000002791	ENSRNOG00000000837	ENSRNOG00000001068	ENSRNOG00000000477	ENSRNOG00000007372	ENSRNOG00000008716	ENSRNOG00000012944	ENSRNOG00000012439	ENSRNOG00000006984	ENSRNOG00000004437	ENSRNOG00000008022	ENSRNOG00000003398	ENSRNOG00000023280	ENSRNOG00000055672	ENSRNOG00000052564	ENSRNOG00000005551	ENSRNOG00000048812	ENSRNOG00000009751	ENSRNOG00000020876	ENSRNOG00000001130	ENSRNOG00000009745	ENSRNOG00000003280	ENSRNOG00000033559	ENSRNOG00000008766	ENSRNOG00000057180	ENSRNOG00000021063	ENSRNOG00000018556	ENSRNOG00000007946	ENSRNOG00000005368	ENSRNOG00000054782	ENSRNOG00000002115	ENSRNOG00000054204	ENSRNOG00000033924	ENSRNOG00000055156	ENSRNOG00000060749	ENSRNOG00000052880	ENSRNOG00000010461	ENSRNOG00000032885	ENSRNOG00000046657	ENSRNOG00000008364	ENSRNOG00000033942	ENSRNOG00000033434	ENSRNOG00000006612	ENSRNOG00000030665	ENSRNOG00000005479	ENSRNOG00000016575
Endocrine resistance	ENSRNOG00000002079	ENSRNOG00000000513	ENSRNOG00000000515	ENSRNOG00000049768	ENSRNOG00000019358	ENSRNOG00000005343	ENSRNOG00000029273	ENSRNOG00000002791	ENSRNOG00000019338	ENSRNOG00000000442	ENSRNOG00000018835	ENSRNOG00000004890	ENSRNOG00000021497	ENSRNOG00000003919	ENSRNOG00000009338	ENSRNOG00000016846	ENSRNOG00000004346	ENSRNOG00000007443	ENSRNOG00000016029	ENSRNOG00000006984	ENSRNOG00000001287	ENSRNOG00000023079	ENSRNOG00000009495	ENSRNOG00000018677	ENSRNOG00000047741	ENSRNOG00000018646	ENSRNOG00000050860	ENSRNOG00000020657	ENSRNOG00000000145	ENSRNOG00000006450	ENSRNOG00000017539	ENSRNOG00000020155	ENSRNOG00000004826	ENSRNOG00000056810	ENSRNOG00000010957	ENSRNOG00000020876	ENSRNOG00000023622	ENSRNOG00000025602	ENSRNOG00000008030	ENSRNOG00000056371	ENSRNOG00000001849	ENSRNOG00000025889	ENSRNOG00000002823	ENSRNOG00000020401	ENSRNOG00000037360	ENSRNOG00000014776	ENSRNOG00000016384	ENSRNOG00000018903	ENSRNOG00000031129
Cholinergic synapse	ENSRNOG00000017801	ENSRNOG00000025012	ENSRNOG00000062141	ENSRNOG00000052795	ENSRNOG00000000596	ENSRNOG00000049768	ENSRNOG00000002791	ENSRNOG00000013829	ENSRNOG00000011202	ENSRNOG00000014427	ENSRNOG00000020532	ENSRNOG00000013869	ENSRNOG00000004720	ENSRNOG00000009783	ENSRNOG00000025040	ENSRNOG00000005413	ENSRNOG00000008622	ENSRNOG00000004890	ENSRNOG00000023493	ENSRNOG00000021497	ENSRNOG00000009338	ENSRNOG00000047914	ENSRNOG00000016846	ENSRNOG00000004560	ENSRNOG00000004810	ENSRNOG00000059968	ENSRNOG00000011589	ENSRNOG00000023079	ENSRNOG00000019465	ENSRNOG00000018677	ENSRNOG00000050469	ENSRNOG00000039562	ENSRNOG00000021150	ENSRNOG00000047799	ENSRNOG00000058337	ENSRNOG00000000145	ENSRNOG00000013147	ENSRNOG00000016701	ENSRNOG00000012826	ENSRNOG00000056810	ENSRNOG00000002303	ENSRNOG00000023428	ENSRNOG00000023622	ENSRNOG00000057096	ENSRNOG00000056371	ENSRNOG00000001849	ENSRNOG00000020401	ENSRNOG00000005369	ENSRNOG00000052080
EGFR tyrosine kinase inhibitor resistance	ENSRNOG00000019634	ENSRNOG00000051964	ENSRNOG00000029148	ENSRNOG00000000299	ENSRNOG00000052343	ENSRNOG00000002791	ENSRNOG00000012582	ENSRNOG00000018233	ENSRNOG00000018461	ENSRNOG00000010695	ENSRNOG00000021497	ENSRNOG00000001312	ENSRNOG00000003919	ENSRNOG00000009338	ENSRNOG00000016846	ENSRNOG00000019742	ENSRNOG00000010278	ENSRNOG00000052745	ENSRNOG00000059968	ENSRNOG00000023079	ENSRNOG00000009495	ENSRNOG00000018677	ENSRNOG00000019598	ENSRNOG00000020716	ENSRNOG00000020657	ENSRNOG00000000145	ENSRNOG00000006450	ENSRNOG00000051986	ENSRNOG00000046829	ENSRNOG00000002833	ENSRNOG00000004826	ENSRNOG00000056810	ENSRNOG00000010957	ENSRNOG00000020876	ENSRNOG00000023622	ENSRNOG00000008030	ENSRNOG00000056371	ENSRNOG00000001849	ENSRNOG00000037360	ENSRNOG00000002244	ENSRNOG00000016384	ENSRNOG00000051490	ENSRNOG00000011157	ENSRNOG00000018903	ENSRNOG00000003491	ENSRNOG00000019093	ENSRNOG00000020005	ENSRNOG00000016611	ENSRNOG00000007946
Nicotine addiction	ENSRNOG00000020650	ENSRNOG00000016147	ENSRNOG00000060599	ENSRNOG00000010803	ENSRNOG00000014862	ENSRNOG00000011202	ENSRNOG00000007581	ENSRNOG00000012562	ENSRNOG00000002327	ENSRNOG00000004560	ENSRNOG00000003512	ENSRNOG00000002349	ENSRNOG00000003680	ENSRNOG00000003280	ENSRNOG00000008766	ENSRNOG00000002336	ENSRNOG00000020778	ENSRNOG00000021063	ENSRNOG00000003241	ENSRNOG00000032417	ENSRNOG00000054204	ENSRNOG00000007490	ENSRNOG00000015393	ENSRNOG00000016385	ENSRNOG00000053402	ENSRNOG00000033942	ENSRNOG00000002360	ENSRNOG00000006957	ENSRNOG00000001679	ENSRNOG00000005723	ENSRNOG00000010853	ENSRNOG00000007682	ENSRNOG00000012283	ENSRNOG00000011726	ENSRNOG00000052707	ENSRNOG00000046581	ENSRNOG00000045816	ENSRNOG00000061182	ENSRNOG00000007603	ENSRNOG00000003569	ENSRNOG00000056558
Ferroptosis	ENSRNOG00000013604	ENSRNOG00000017905	ENSRNOG00000013409	ENSRNOG00000023094	ENSRNOG00000036852	ENSRNOG00000007486	ENSRNOG00000038106	ENSRNOG00000014988	ENSRNOG00000029082	ENSRNOG00000048318	ENSRNOG00000009832	ENSRNOG00000019550	ENSRNOG00000048574	ENSRNOG00000049995	ENSRNOG00000003809	ENSRNOG00000011714	ENSRNOG00000006713	ENSRNOG00000003872	ENSRNOG00000010633	ENSRNOG00000019277	ENSRNOG00000003783	ENSRNOG00000021259	ENSRNOG00000006302	ENSRNOG00000003622	ENSRNOG00000034150	ENSRNOG00000012508	ENSRNOG00000018487	ENSRNOG00000010210	ENSRNOG00000013505	ENSRNOG00000022941	ENSRNOG00000022619	ENSRNOG00000020843	ENSRNOG00000016265	ENSRNOG00000046657	ENSRNOG00000001766	ENSRNOG00000026745	ENSRNOG00000004662	ENSRNOG00000030665	ENSRNOG00000054417	ENSRNOG00000022407	ENSRNOG00000012269	ENSRNOG00000014117	ENSRNOG00000025443	ENSRNOG00000018964	ENSRNOG00000019180	ENSRNOG00000000322	ENSRNOG00000030625	ENSRNOG00000031506	ENSRNOG00000014718
Pertussis	ENSRNOG00000002079	ENSRNOG00000000513	ENSRNOG00000000515	ENSRNOG00000051235	ENSRNOG00000047657	ENSRNOG00000018899	ENSRNOG00000000837	ENSRNOG00000030729	ENSRNOG00000000443	ENSRNOG00000004060	ENSRNOG00000007372	ENSRNOG00000003170	ENSRNOG00000030888	ENSRNOG00000020660	ENSRNOG00000008144	ENSRNOG00000056216	ENSRNOG00000016770	ENSRNOG00000010278	ENSRNOG00000003254	ENSRNOG00000006984	ENSRNOG00000004575	ENSRNOG00000011971	ENSRNOG00000019465	ENSRNOG00000002843	ENSRNOG00000011796	ENSRNOG00000005965	ENSRNOG00000004647	ENSRNOG00000020155	ENSRNOG00000042954	ENSRNOG00000013634	ENSRNOG00000057096	ENSRNOG00000001849	ENSRNOG00000010966	ENSRNOG00000050519	ENSRNOG00000002823	ENSRNOG00000012807	ENSRNOG00000004380	ENSRNOG00000031955	ENSRNOG00000046834	ENSRNOG00000011438	ENSRNOG00000012804	ENSRNOG00000026293	ENSRNOG00000016592	ENSRNOG00000001224	ENSRNOG00000038202	ENSRNOG00000008015	ENSRNOG00000009468	ENSRNOG00000017819	ENSRNOG00000019675
Selenocompound metabolism	ENSRNOG00000050002	ENSRNOG00000048668	ENSRNOG00000009088	ENSRNOG00000020083	ENSRNOG00000011068	ENSRNOG00000011311	ENSRNOG00000043426	ENSRNOG00000020605	ENSRNOG00000057089	ENSRNOG00000018125	ENSRNOG00000025459	ENSRNOG00000059810	ENSRNOG00000001890	ENSRNOG00000011250	ENSRNOG00000016097	ENSRNOG00000017593	ENSRNOG00000010658	ENSRNOG00000049244
Insulin resistance	ENSRNOG00000002079	ENSRNOG00000029986	ENSRNOG00000000837	ENSRNOG00000005906	ENSRNOG00000043176	ENSRNOG00000040108	ENSRNOG00000003359	ENSRNOG00000051171	ENSRNOG00000016346	ENSRNOG00000030888	ENSRNOG00000005413	ENSRNOG00000008622	ENSRNOG00000023493	ENSRNOG00000021497	ENSRNOG00000015421	ENSRNOG00000003919	ENSRNOG00000016846	ENSRNOG00000019742	ENSRNOG00000010278	ENSRNOG00000018708	ENSRNOG00000010128	ENSRNOG00000007583	ENSRNOG00000018507	ENSRNOG00000015603	ENSRNOG00000014904	ENSRNOG00000001142	ENSRNOG00000000658	ENSRNOG00000002946	ENSRNOG00000018677	ENSRNOG00000007706	ENSRNOG00000019977	ENSRNOG00000007319	ENSRNOG00000000145	ENSRNOG00000002833	ENSRNOG00000012826	ENSRNOG00000020155	ENSRNOG00000004473	ENSRNOG00000056810	ENSRNOG00000023622	ENSRNOG00000053869	ENSRNOG00000017226	ENSRNOG00000056371	ENSRNOG00000002823	ENSRNOG00000028616	ENSRNOG00000016384	ENSRNOG00000060463	ENSRNOG00000018445	ENSRNOG00000018903	ENSRNOG00000050620
Central carbon metabolism in cancer	ENSRNOG00000013953	ENSRNOG00000002227	ENSRNOG00000004500	ENSRNOG00000013009	ENSRNOG00000018461	ENSRNOG00000021497	ENSRNOG00000013828	ENSRNOG00000061527	ENSRNOG00000009338	ENSRNOG00000016846	ENSRNOG00000006393	ENSRNOG00000052745	ENSRNOG00000015948	ENSRNOG00000013532	ENSRNOG00000036677	ENSRNOG00000023079	ENSRNOG00000018677	ENSRNOG00000051816	ENSRNOG00000047276	ENSRNOG00000013000	ENSRNOG00000056728	ENSRNOG00000054764	ENSRNOG00000000145	ENSRNOG00000006450	ENSRNOG00000011329	ENSRNOG00000056810	ENSRNOG00000006116	ENSRNOG00000046891	ENSRNOG00000023622	ENSRNOG00000056371	ENSRNOG00000001849	ENSRNOG00000018824	ENSRNOG00000002244	ENSRNOG00000016384	ENSRNOG00000031612	ENSRNOG00000016050	ENSRNOG00000018903	ENSRNOG00000018674	ENSRNOG00000016223	ENSRNOG00000014745	ENSRNOG00000001214	ENSRNOG00000020005	ENSRNOG00000016611	ENSRNOG00000010153	ENSRNOG00000007284	ENSRNOG00000013103	ENSRNOG00000011875	ENSRNOG00000001517	ENSRNOG00000046657
GnRH signaling pathway	ENSRNOG00000017801	ENSRNOG00000052795	ENSRNOG00000002079	ENSRNOG00000000513	ENSRNOG00000000515	ENSRNOG00000049768	ENSRNOG00000004060	ENSRNOG00000047907	ENSRNOG00000016346	ENSRNOG00000009783	ENSRNOG00000004890	ENSRNOG00000019422	ENSRNOG00000009338	ENSRNOG00000016770	ENSRNOG00000003834	ENSRNOG00000006984	ENSRNOG00000004437	ENSRNOG00000013177	ENSRNOG00000004810	ENSRNOG00000011589	ENSRNOG00000023079	ENSRNOG00000010947	ENSRNOG00000009495	ENSRNOG00000018646	ENSRNOG00000013536	ENSRNOG00000021150	ENSRNOG00000004898	ENSRNOG00000058337	ENSRNOG00000026764	ENSRNOG00000002412	ENSRNOG00000013147	ENSRNOG00000027839	ENSRNOG00000020155	ENSRNOG00000004826	ENSRNOG00000037231	ENSRNOG00000017419	ENSRNOG00000001849	ENSRNOG00000025889	ENSRNOG00000002823	ENSRNOG00000020401	ENSRNOG00000037360	ENSRNOG00000047040	ENSRNOG00000052080	ENSRNOG00000014776	ENSRNOG00000010171	ENSRNOG00000031955	ENSRNOG00000003491	ENSRNOG00000026293	ENSRNOG00000010348
cAMP signaling pathway	ENSRNOG00000002079	ENSRNOG00000051950	ENSRNOG00000049768	ENSRNOG00000000774	ENSRNOG00000001068	ENSRNOG00000018808	ENSRNOG00000003972	ENSRNOG00000002934	ENSRNOG00000030119	ENSRNOG00000012562	ENSRNOG00000004060	ENSRNOG00000003442	ENSRNOG00000020828	ENSRNOG00000018268	ENSRNOG00000030888	ENSRNOG00000009783	ENSRNOG00000005413	ENSRNOG00000008622	ENSRNOG00000000413	ENSRNOG00000004890	ENSRNOG00000015860	ENSRNOG00000023493	ENSRNOG00000021497	ENSRNOG00000014039	ENSRNOG00000048172	ENSRNOG00000016770	ENSRNOG00000016846	ENSRNOG00000012721	ENSRNOG00000010325	ENSRNOG00000007048	ENSRNOG00000025120	ENSRNOG00000024517	ENSRNOG00000002793	ENSRNOG00000018708	ENSRNOG00000012038	ENSRNOG00000017609	ENSRNOG00000042536	ENSRNOG00000007477	ENSRNOG00000007350	ENSRNOG00000011589	ENSRNOG00000003031	ENSRNOG00000019465	ENSRNOG00000011310	ENSRNOG00000018677	ENSRNOG00000055103	ENSRNOG00000031773	ENSRNOG00000023753	ENSRNOG00000004898	ENSRNOG00000018250
mTOR signaling pathway	ENSRNOG00000019634	ENSRNOG00000029986	ENSRNOG00000052343	ENSRNOG00000062165	ENSRNOG00000000837	ENSRNOG00000000840	ENSRNOG00000007051	ENSRNOG00000012582	ENSRNOG00000001992	ENSRNOG00000019908	ENSRNOG00000010103	ENSRNOG00000011470	ENSRNOG00000030862	ENSRNOG00000061031	ENSRNOG00000018967	ENSRNOG00000004328	ENSRNOG00000051860	ENSRNOG00000057078	ENSRNOG00000021497	ENSRNOG00000017409	ENSRNOG00000051905	ENSRNOG00000003919	ENSRNOG00000009338	ENSRNOG00000016846	ENSRNOG00000015618	ENSRNOG00000019713	ENSRNOG00000008168	ENSRNOG00000011905	ENSRNOG00000014385	ENSRNOG00000003821	ENSRNOG00000019423	ENSRNOG00000004660	ENSRNOG00000061238	ENSRNOG00000016119	ENSRNOG00000003807	ENSRNOG00000023079	ENSRNOG00000004846	ENSRNOG00000061818	ENSRNOG00000009851	ENSRNOG00000015982	ENSRNOG00000050535	ENSRNOG00000018677	ENSRNOG00000007706	ENSRNOG00000017915	ENSRNOG00000000145	ENSRNOG00000014859	ENSRNOG00000022485	ENSRNOG00000002833	ENSRNOG00000002763
Rap1 signaling pathway	ENSRNOG00000000513	ENSRNOG00000000515	ENSRNOG00000029986	ENSRNOG00000051964	ENSRNOG00000029148	ENSRNOG00000049768	ENSRNOG00000002227	ENSRNOG00000007646	ENSRNOG00000001068	ENSRNOG00000061530	ENSRNOG00000004060	ENSRNOG00000049342	ENSRNOG00000014312	ENSRNOG00000046089	ENSRNOG00000049830	ENSRNOG00000047797	ENSRNOG00000049773	ENSRNOG00000020899	ENSRNOG00000046292	ENSRNOG00000005271	ENSRNOG00000018461	ENSRNOG00000010695	ENSRNOG00000004890	ENSRNOG00000010758	ENSRNOG00000021497	ENSRNOG00000001312	ENSRNOG00000033801	ENSRNOG00000046646	ENSRNOG00000048670	ENSRNOG00000021581	ENSRNOG00000048172	ENSRNOG00000009338	ENSRNOG00000016770	ENSRNOG00000008223	ENSRNOG00000051843	ENSRNOG00000016846	ENSRNOG00000011174	ENSRNOG00000007048	ENSRNOG00000048203	ENSRNOG00000014316	ENSRNOG00000054269	ENSRNOG00000054267	ENSRNOG00000053359	ENSRNOG00000042119	ENSRNOG00000048115	ENSRNOG00000016203	ENSRNOG00000023881	ENSRNOG00000052745	ENSRNOG00000006984
Hippo signaling pathway -fly	ENSRNOG00000002079	ENSRNOG00000028335	ENSRNOG00000004500	ENSRNOG00000047473	ENSRNOG00000005389	ENSRNOG00000010996	ENSRNOG00000000506	ENSRNOG00000025498	ENSRNOG00000015488	ENSRNOG00000011278	ENSRNOG00000061818	ENSRNOG00000013938	ENSRNOG00000010945	ENSRNOG00000032574	ENSRNOG00000056343	ENSRNOG00000020695	ENSRNOG00000016246	ENSRNOG00000018851	ENSRNOG00000011158	ENSRNOG00000032437	ENSRNOG00000053452	ENSRNOG00000013076	ENSRNOG00000020155	ENSRNOG00000008195	ENSRNOG00000002823	ENSRNOG00000011282	ENSRNOG00000008788	ENSRNOG00000008055	ENSRNOG00000004837	ENSRNOG00000005608	ENSRNOG00000023296	ENSRNOG00000051650	ENSRNOG00000001924	ENSRNOG00000010922	ENSRNOG00000005783	ENSRNOG00000005290	ENSRNOG00000003948	ENSRNOG00000016940	ENSRNOG00000048433	ENSRNOG00000031643	ENSRNOG00000036701	ENSRNOG00000001893	ENSRNOG00000058202	ENSRNOG00000017746	ENSRNOG00000013526	ENSRNOG00000005933	ENSRNOG00000009652	ENSRNOG00000012791	ENSRNOG00000038597
Arginine biosynthesis	ENSRNOG00000013704	ENSRNOG00000057367	ENSRNOG00000008837	ENSRNOG00000038473	ENSRNOG00000059579	ENSRNOG00000020879	ENSRNOG00000053811	ENSRNOG00000000903	ENSRNOG00000001130	ENSRNOG00000011189	ENSRNOG00000031612	ENSRNOG00000009348	ENSRNOG00000049560	ENSRNOG00000057443	ENSRNOG00000016356	ENSRNOG00000003370	ENSRNOG00000011782	ENSRNOG00000056246	ENSRNOG00000013304	ENSRNOG00000033915
Linoleic acid metabolism	ENSRNOG00000000969	ENSRNOG00000024016	ENSRNOG00000049464	ENSRNOG00000030466	ENSRNOG00000046643	ENSRNOG00000001466	ENSRNOG00000057470	ENSRNOG00000013291	ENSRNOG00000026764	ENSRNOG00000032560	ENSRNOG00000012458	ENSRNOG00000052810	ENSRNOG00000037231	ENSRNOG00000046080	ENSRNOG00000021405	ENSRNOG00000016798	ENSRNOG00000016173	ENSRNOG00000021206	ENSRNOG00000012295	ENSRNOG00000003164	ENSRNOG00000016826	ENSRNOG00000001153	ENSRNOG00000021924	ENSRNOG00000031004	ENSRNOG00000001379	ENSRNOG00000024904	ENSRNOG00000042224	ENSRNOG00000013241	ENSRNOG00000002657	ENSRNOG00000008135	ENSRNOG00000025121	ENSRNOG00000026037	ENSRNOG00000054181	ENSRNOG00000016838	ENSRNOG00000046619	ENSRNOG00000047945	ENSRNOG00000019183	ENSRNOG00000016945	ENSRNOG00000016647	ENSRNOG00000007447	ENSRNOG00000056733
TNF signaling pathway	ENSRNOG00000017285	ENSRNOG00000017801	ENSRNOG00000002079	ENSRNOG00000000513	ENSRNOG00000000515	ENSRNOG00000048914	ENSRNOG00000000837	ENSRNOG00000000838	ENSRNOG00000010906	ENSRNOG00000002723	ENSRNOG00000000431	ENSRNOG00000047035	ENSRNOG00000002525	ENSRNOG00000038955	ENSRNOG00000030888	ENSRNOG00000021117	ENSRNOG00000007002	ENSRNOG00000005413	ENSRNOG00000008622	ENSRNOG00000023493	ENSRNOG00000021497	ENSRNOG00000006268	ENSRNOG00000008144	ENSRNOG00000056216	ENSRNOG00000015027	ENSRNOG00000016846	ENSRNOG00000026805	ENSRNOG00000042560	ENSRNOG00000010278	ENSRNOG00000001813	ENSRNOG00000032626	ENSRNOG00000004362	ENSRNOG00000003834	ENSRNOG00000007443	ENSRNOG00000006984	ENSRNOG00000004437	ENSRNOG00000016054	ENSRNOG00000010947	ENSRNOG00000002946	ENSRNOG00000018677	ENSRNOG00000002843	ENSRNOG00000019142	ENSRNOG00000008145	ENSRNOG00000057347	ENSRNOG00000020465	ENSRNOG00000043416	ENSRNOG00000000145	ENSRNOG00000022485	ENSRNOG00000012331
Serotonergic synapse	ENSRNOG00000052795	ENSRNOG00000060599	ENSRNOG00000024016	ENSRNOG00000018827	ENSRNOG00000049464	ENSRNOG00000030466	ENSRNOG00000002525	ENSRNOG00000025040	ENSRNOG00000009338	ENSRNOG00000047914	ENSRNOG00000002327	ENSRNOG00000054902	ENSRNOG00000029179	ENSRNOG00000004560	ENSRNOG00000001466	ENSRNOG00000012038	ENSRNOG00000004810	ENSRNOG00000007415	ENSRNOG00000023079	ENSRNOG00000019465	ENSRNOG00000013291	ENSRNOG00000032261	ENSRNOG00000050469	ENSRNOG00000039562	ENSRNOG00000021150	ENSRNOG00000047799	ENSRNOG00000058337	ENSRNOG00000003880	ENSRNOG00000026764	ENSRNOG00000013147	ENSRNOG00000016701	ENSRNOG00000007645	ENSRNOG00000003680	ENSRNOG00000052810	ENSRNOG00000037231	ENSRNOG00000010957	ENSRNOG00000046080	ENSRNOG00000021405	ENSRNOG00000057096	ENSRNOG00000001849	ENSRNOG00000025889	ENSRNOG00000012972	ENSRNOG00000006997	ENSRNOG00000008890	ENSRNOG00000017625	ENSRNOG00000005369	ENSRNOG00000038205	ENSRNOG00000048980	ENSRNOG00000013042
Hedgehog signaling pathway - fly	ENSRNOG00000005310	ENSRNOG00000015633	ENSRNOG00000000999	ENSRNOG00000016913	ENSRNOG00000056580	ENSRNOG00000017106	ENSRNOG00000018529	ENSRNOG00000004395	ENSRNOG00000002833	ENSRNOG00000013076	ENSRNOG00000009694	ENSRNOG00000006846	ENSRNOG00000016280	ENSRNOG00000011439	ENSRNOG00000008332	ENSRNOG00000004686	ENSRNOG00000058914	ENSRNOG00000014623	ENSRNOG00000005828	ENSRNOG00000005070	ENSRNOG00000005257	ENSRNOG00000019354	ENSRNOG00000011847	ENSRNOG00000016620	ENSRNOG00000014615	ENSRNOG00000004978	ENSRNOG00000019807	ENSRNOG00000016677
Adherens junction	ENSRNOG00000029986	ENSRNOG00000000596	ENSRNOG00000015425	ENSRNOG00000048898	ENSRNOG00000001068	ENSRNOG00000000847	ENSRNOG00000012002	ENSRNOG00000014753	ENSRNOG00000060775	ENSRNOG00000000373	ENSRNOG00000000378	ENSRNOG00000048172	ENSRNOG00000002176	ENSRNOG00000052745	ENSRNOG00000007350	ENSRNOG00000054121	ENSRNOG00000009495	ENSRNOG00000013536	ENSRNOG00000023753	ENSRNOG00000019977	ENSRNOG00000007036	ENSRNOG00000013993	ENSRNOG00000030790	ENSRNOG00000032437	ENSRNOG00000006450	ENSRNOG00000053452	ENSRNOG00000042954	ENSRNOG00000000190	ENSRNOG00000001849	ENSRNOG00000050519	ENSRNOG00000008620	ENSRNOG00000010765	ENSRNOG00000016050	ENSRNOG00000031058	ENSRNOG00000005872	ENSRNOG00000049232	ENSRNOG00000006403	ENSRNOG00000034025	ENSRNOG00000047476	ENSRNOG00000037227	ENSRNOG00000018730	ENSRNOG00000005796	ENSRNOG00000015658	ENSRNOG00000004029	ENSRNOG00000011077	ENSRNOG00000036701	ENSRNOG00000014187	ENSRNOG00000009594	ENSRNOG00000015898
Amphetamine addiction	ENSRNOG00000017801	ENSRNOG00000043210	ENSRNOG00000043465	ENSRNOG00000000431	ENSRNOG00000012562	ENSRNOG00000004060	ENSRNOG00000009783	ENSRNOG00000005413	ENSRNOG00000008622	ENSRNOG00000023493	ENSRNOG00000016770	ENSRNOG00000046667	ENSRNOG00000018708	ENSRNOG00000029165	ENSRNOG00000011589	ENSRNOG00000051592	ENSRNOG00000020410	ENSRNOG00000013147	ENSRNOG00000000604	ENSRNOG00000012826	ENSRNOG00000009745	ENSRNOG00000025889	ENSRNOG00000008890	ENSRNOG00000052080	ENSRNOG00000003280	ENSRNOG00000008766	ENSRNOG00000031955	ENSRNOG00000016452	ENSRNOG00000003491	ENSRNOG00000028404	ENSRNOG00000021063	ENSRNOG00000026293	ENSRNOG00000029778	ENSRNOG00000007090	ENSRNOG00000038202	ENSRNOG00000008015	ENSRNOG00000005368	ENSRNOG00000054782	ENSRNOG00000002848	ENSRNOG00000054204	ENSRNOG00000002229	ENSRNOG00000047374	ENSRNOG00000033942	ENSRNOG00000005257	ENSRNOG00000006957	ENSRNOG00000009568	ENSRNOG00000001269	ENSRNOG00000004612	ENSRNOG00000020478
Relaxin signaling pathway	ENSRNOG00000017801	ENSRNOG00000002079	ENSRNOG00000000513	ENSRNOG00000000515	ENSRNOG00000049768	ENSRNOG00000014851	ENSRNOG00000000431	ENSRNOG00000030888	ENSRNOG00000025040	ENSRNOG00000005413	ENSRNOG00000008622	ENSRNOG00000004890	ENSRNOG00000023493	ENSRNOG00000021497	ENSRNOG00000009338	ENSRNOG00000047914	ENSRNOG00000016846	ENSRNOG00000003834	ENSRNOG00000006984	ENSRNOG00000004810	ENSRNOG00000018951	ENSRNOG00000023079	ENSRNOG00000010997	ENSRNOG00000019465	ENSRNOG00000009495	ENSRNOG00000000897	ENSRNOG00000018677	ENSRNOG00000054945	ENSRNOG00000019598	ENSRNOG00000060867	ENSRNOG00000050469	ENSRNOG00000039562	ENSRNOG00000021150	ENSRNOG00000047799	ENSRNOG00000007036	ENSRNOG00000058337	ENSRNOG00000020657	ENSRNOG00000000145	ENSRNOG00000016701	ENSRNOG00000017539	ENSRNOG00000012826	ENSRNOG00000020155	ENSRNOG00000004826	ENSRNOG00000056810	ENSRNOG00000003587	ENSRNOG00000023622	ENSRNOG00000001130	ENSRNOG00000057096	ENSRNOG00000008030
Protein export	ENSRNOG00000023278	ENSRNOG00000000314	ENSRNOG00000018075	ENSRNOG00000049451	ENSRNOG00000049355	ENSRNOG00000049016	ENSRNOG00000017036	ENSRNOG00000014455	ENSRNOG00000003211	ENSRNOG00000018164	ENSRNOG00000002100	ENSRNOG00000061620	ENSRNOG00000004829	ENSRNOG00000046858	ENSRNOG00000011029	ENSRNOG00000009351	ENSRNOG00000038933	ENSRNOG00000018294	ENSRNOG00000005203	ENSRNOG00000013743	ENSRNOG00000032776	ENSRNOG00000010543	ENSRNOG00000060417	ENSRNOG00000007512	ENSRNOG00000009713	ENSRNOG00000020204	ENSRNOG00000006345	ENSRNOG00000009057
Glycine, serine and threonine metabolism	ENSRNOG00000002991	ENSRNOG00000000925	ENSRNOG00000012794	ENSRNOG00000051307	ENSRNOG00000000167	ENSRNOG00000001391	ENSRNOG00000001388	ENSRNOG00000056596	ENSRNOG00000010133	ENSRNOG00000017821	ENSRNOG00000048623	ENSRNOG00000011200	ENSRNOG00000050214	ENSRNOG00000013532	ENSRNOG00000045615	ENSRNOG00000013971	ENSRNOG00000023856	ENSRNOG00000015859	ENSRNOG00000008106	ENSRNOG00000023588	ENSRNOG00000029778	ENSRNOG00000016349	ENSRNOG00000005275	ENSRNOG00000002848	ENSRNOG00000029528	ENSRNOG00000057089	ENSRNOG00000011599	ENSRNOG00000036665	ENSRNOG00000024577	ENSRNOG00000006916	ENSRNOG00000046307	ENSRNOG00000054962	ENSRNOG00000011342	ENSRNOG00000000168	ENSRNOG00000006364	ENSRNOG00000019328	ENSRNOG00000055408	ENSRNOG00000050585	ENSRNOG00000014645	ENSRNOG00000010658	ENSRNOG00000055383	ENSRNOG00000051496	ENSRNOG00000008798	ENSRNOG00000011535
Melanoma	ENSRNOG00000000485	ENSRNOG00000051964	ENSRNOG00000029148	ENSRNOG00000029273	ENSRNOG00000061530	ENSRNOG00000020899	ENSRNOG00000008658	ENSRNOG00000018461	ENSRNOG00000010695	ENSRNOG00000021497	ENSRNOG00000001312	ENSRNOG00000009338	ENSRNOG00000016846	ENSRNOG00000016029	ENSRNOG00000052745	ENSRNOG00000023079	ENSRNOG00000018677	ENSRNOG00000047741	ENSRNOG00000013090	ENSRNOG00000052205	ENSRNOG00000000145	ENSRNOG00000056810	ENSRNOG00000010957	ENSRNOG00000020876	ENSRNOG00000023622	ENSRNOG00000048389	ENSRNOG00000025602	ENSRNOG00000056371	ENSRNOG00000001849	ENSRNOG00000022631	ENSRNOG00000002244	ENSRNOG00000016384	ENSRNOG00000016050	ENSRNOG00000014071	ENSRNOG00000018903	ENSRNOG00000006304	ENSRNOG00000060626	ENSRNOG00000020005	ENSRNOG00000016611	ENSRNOG00000019822	ENSRNOG00000010153	ENSRNOG00000010838	ENSRNOG00000012912	ENSRNOG00000059837	ENSRNOG00000017524	ENSRNOG00000020918	ENSRNOG00000014187	ENSRNOG00000011471	ENSRNOG00000013867
Adrenergic signaling in cardiomyocytes	ENSRNOG00000017801	ENSRNOG00000000513	ENSRNOG00000000515	ENSRNOG00000049768	ENSRNOG00000002791	ENSRNOG00000002934	ENSRNOG00000020532	ENSRNOG00000000431	ENSRNOG00000004060	ENSRNOG00000004518	ENSRNOG00000009783	ENSRNOG00000005413	ENSRNOG00000008622	ENSRNOG00000033531	ENSRNOG00000000413	ENSRNOG00000004890	ENSRNOG00000023493	ENSRNOG00000021497	ENSRNOG00000018943	ENSRNOG00000005389	ENSRNOG00000016770	ENSRNOG00000018184	ENSRNOG00000018708	ENSRNOG00000004362	ENSRNOG00000006984	ENSRNOG00000004810	ENSRNOG00000011589	ENSRNOG00000003031	ENSRNOG00000019465	ENSRNOG00000018677	ENSRNOG00000057852	ENSRNOG00000003262	ENSRNOG00000018378	ENSRNOG00000021150	ENSRNOG00000018250	ENSRNOG00000058337	ENSRNOG00000003245	ENSRNOG00000007982	ENSRNOG00000061304	ENSRNOG00000018851	ENSRNOG00000014900	ENSRNOG00000013147	ENSRNOG00000011158	ENSRNOG00000012826	ENSRNOG00000060087	ENSRNOG00000030269	ENSRNOG00000023428	ENSRNOG00000056257	ENSRNOG00000049270
Protein processing in endoplasmic reticulum	ENSRNOG00000017801	ENSRNOG00000000485	ENSRNOG00000010352	ENSRNOG00000002079	ENSRNOG00000023373	ENSRNOG00000005310	ENSRNOG00000007434	ENSRNOG00000001050	ENSRNOG00000002791	ENSRNOG00000045654	ENSRNOG00000010819	ENSRNOG00000047966	ENSRNOG00000050647	ENSRNOG00000023278	ENSRNOG00000005108	ENSRNOG00000019933	ENSRNOG00000019940	ENSRNOG00000000431	ENSRNOG00000000438	ENSRNOG00000000314	ENSRNOG00000014872	ENSRNOG00000015018	ENSRNOG00000000150	ENSRNOG00000049451	ENSRNOG00000028358	ENSRNOG00000002609	ENSRNOG00000028243	ENSRNOG00000003099	ENSRNOG00000017087	ENSRNOG00000011148	ENSRNOG00000016251	ENSRNOG00000054620	ENSRNOG00000049016	ENSRNOG00000006462	ENSRNOG00000007644	ENSRNOG00000019724	ENSRNOG00000011066	ENSRNOG00000055446	ENSRNOG00000009090	ENSRNOG00000016137	ENSRNOG00000012864	ENSRNOG00000010041	ENSRNOG00000061099	ENSRNOG00000005551	ENSRNOG00000005958	ENSRNOG00000004820	ENSRNOG00000014455	ENSRNOG00000050197	ENSRNOG00000012851
Cocaine addiction	ENSRNOG00000017801	ENSRNOG00000000431	ENSRNOG00000012562	ENSRNOG00000030888	ENSRNOG00000005413	ENSRNOG00000008622	ENSRNOG00000023493	ENSRNOG00000046667	ENSRNOG00000019465	ENSRNOG00000021685	ENSRNOG00000020410	ENSRNOG00000012826	ENSRNOG00000057096	ENSRNOG00000025889	ENSRNOG00000008890	ENSRNOG00000003280	ENSRNOG00000008428	ENSRNOG00000008766	ENSRNOG00000016452	ENSRNOG00000028404	ENSRNOG00000021063	ENSRNOG00000018666	ENSRNOG00000026293	ENSRNOG00000029778	ENSRNOG00000016592	ENSRNOG00000002848	ENSRNOG00000054204	ENSRNOG00000005519	ENSRNOG00000002229	ENSRNOG00000023258	ENSRNOG00000047374	ENSRNOG00000033942	ENSRNOG00000005257	ENSRNOG00000047466	ENSRNOG00000003800	ENSRNOG00000017302	ENSRNOG00000005723	ENSRNOG00000011992	ENSRNOG00000008017	ENSRNOG00000013412	ENSRNOG00000013171	ENSRNOG00000026036	ENSRNOG00000023688	ENSRNOG00000011726	ENSRNOG00000032202	ENSRNOG00000018526	ENSRNOG00000046581	ENSRNOG00000004978	ENSRNOG00000004327
AGE-RAGE signaling pathway in diabetic complications	ENSRNOG00000002079	ENSRNOG00000000513	ENSRNOG00000000515	ENSRNOG00000002791	ENSRNOG00000000837	ENSRNOG00000001068	ENSRNOG00000002723	ENSRNOG00000014851	ENSRNOG00000000439	ENSRNOG00000016346	ENSRNOG00000030888	ENSRNOG00000019422	ENSRNOG00000021497	ENSRNOG00000009338	ENSRNOG00000016846	ENSRNOG00000019496	ENSRNOG00000019742	ENSRNOG00000010278	ENSRNOG00000006984	ENSRNOG00000004575	ENSRNOG00000004810	ENSRNOG00000059968	ENSRNOG00000015603	ENSRNOG00000018951	ENSRNOG00000023079	ENSRNOG00000018677	ENSRNOG00000054945	ENSRNOG00000019598	ENSRNOG00000019688	ENSRNOG00000013536	ENSRNOG00000021150	ENSRNOG00000007036	ENSRNOG00000058337	ENSRNOG00000000145	ENSRNOG00000019075	ENSRNOG00000032238	ENSRNOG00000051986	ENSRNOG00000004687	ENSRNOG00000020155	ENSRNOG00000007159	ENSRNOG00000056810	ENSRNOG00000003587	ENSRNOG00000020876	ENSRNOG00000014079	ENSRNOG00000023622	ENSRNOG00000025602	ENSRNOG00000056371	ENSRNOG00000001849	ENSRNOG00000018346
Salivary secretion	ENSRNOG00000052795	ENSRNOG00000029876	ENSRNOG00000049768	ENSRNOG00000030508	ENSRNOG00000030857	ENSRNOG00000036952	ENSRNOG00000005545	ENSRNOG00000020560	ENSRNOG00000012674	ENSRNOG00000002934	ENSRNOG00000004060	ENSRNOG00000010485	ENSRNOG00000003069	ENSRNOG00000005195	ENSRNOG00000004890	ENSRNOG00000003737	ENSRNOG00000016770	ENSRNOG00000019846	ENSRNOG00000003064	ENSRNOG00000006989	ENSRNOG00000019440	ENSRNOG00000004810	ENSRNOG00000005825	ENSRNOG00000003031	ENSRNOG00000012060	ENSRNOG00000021150	ENSRNOG00000058337	ENSRNOG00000007982	ENSRNOG00000061304	ENSRNOG00000020733	ENSRNOG00000060087	ENSRNOG00000030269	ENSRNOG00000001130	ENSRNOG00000005790	ENSRNOG00000025889	ENSRNOG00000020401	ENSRNOG00000014776	ENSRNOG00000019350	ENSRNOG00000030019	ENSRNOG00000031955	ENSRNOG00000003491	ENSRNOG00000020263	ENSRNOG00000005985	ENSRNOG00000016469	ENSRNOG00000009440	ENSRNOG00000008422	ENSRNOG00000032150	ENSRNOG00000006645	ENSRNOG00000038202
Fructose and mannose metabolism	ENSRNOG00000009513	ENSRNOG00000027433	ENSRNOG00000005358	ENSRNOG00000019946	ENSRNOG00000009734	ENSRNOG00000017291	ENSRNOG00000017597	ENSRNOG00000058719	ENSRNOG00000017637	ENSRNOG00000059453	ENSRNOG00000051816	ENSRNOG00000017605	ENSRNOG00000052802	ENSRNOG00000006116	ENSRNOG00000046891	ENSRNOG00000000165	ENSRNOG00000050669	ENSRNOG00000001214	ENSRNOG00000009875	ENSRNOG00000018898	ENSRNOG00000048130	ENSRNOG00000015290	ENSRNOG00000006807	ENSRNOG00000008047	ENSRNOG00000009548	ENSRNOG00000030869	ENSRNOG00000057988	ENSRNOG00000002615	ENSRNOG00000020656	ENSRNOG00000055222	ENSRNOG00000020704	ENSRNOG00000004162	ENSRNOG00000018911	ENSRNOG00000037229	ENSRNOG00000017163	ENSRNOG00000009020	ENSRNOG00000049045	ENSRNOG00000011452	ENSRNOG00000026235
Pentose and glucuronate interconversions	ENSRNOG00000038085	ENSRNOG00000009513	ENSRNOG00000001980	ENSRNOG00000046540	ENSRNOG00000001990	ENSRNOG00000027433	ENSRNOG00000009734	ENSRNOG00000017291	ENSRNOG00000050315	ENSRNOG00000016727	ENSRNOG00000014168	ENSRNOG00000001973	ENSRNOG00000009875	ENSRNOG00000000913	ENSRNOG00000042714	ENSRNOG00000008079	ENSRNOG00000008989	ENSRNOG00000002643	ENSRNOG00000020883	ENSRNOG00000001092	ENSRNOG00000018740	ENSRNOG00000006199
Epithelial cell signaling in Helicobacter pylori infection	ENSRNOG00000002079	ENSRNOG00000014269	ENSRNOG00000048239	ENSRNOG00000000513	ENSRNOG00000000515	ENSRNOG00000000840	ENSRNOG00000010906	ENSRNOG00000017235	ENSRNOG00000001068	ENSRNOG00000001992	ENSRNOG00000030862	ENSRNOG00000030888	ENSRNOG00000009149	ENSRNOG00000051860	ENSRNOG00000061270	ENSRNOG00000013428	ENSRNOG00000006542	ENSRNOG00000011905	ENSRNOG00000008218	ENSRNOG00000006030	ENSRNOG00000003834	ENSRNOG00000052745	ENSRNOG00000006984	ENSRNOG00000004846	ENSRNOG00000009495	ENSRNOG00000018646	ENSRNOG00000052704	ENSRNOG00000013536	ENSRNOG00000054352	ENSRNOG00000008180	ENSRNOG00000022485	ENSRNOG00000051986	ENSRNOG00000060694	ENSRNOG00000042848	ENSRNOG00000020155	ENSRNOG00000049929	ENSRNOG00000007392	ENSRNOG00000004414	ENSRNOG00000006926	ENSRNOG00000002823	ENSRNOG00000028216	ENSRNOG00000051490	ENSRNOG00000026293	ENSRNOG00000013573	ENSRNOG00000002792	ENSRNOG00000029784	ENSRNOG00000003278	ENSRNOG00000011077	ENSRNOG00000054257
Cholesterol metabolism	ENSRNOG00000013313	ENSRNOG00000018426	ENSRNOG00000012016	ENSRNOG00000005906	ENSRNOG00000043176	ENSRNOG00000040108	ENSRNOG00000012062	ENSRNOG00000031814	ENSRNOG00000016488	ENSRNOG00000010549	ENSRNOG00000003566	ENSRNOG00000004111	ENSRNOG00000015052	ENSRNOG00000012181	ENSRNOG00000019573	ENSRNOG00000050860	ENSRNOG00000009313	ENSRNOG00000018126	ENSRNOG00000003575	ENSRNOG00000018694	ENSRNOG00000006280	ENSRNOG00000005542	ENSRNOG00000055909	ENSRNOG00000011490	ENSRNOG00000000981	ENSRNOG00000045679	ENSRNOG00000019277	ENSRNOG00000057173	ENSRNOG00000018454	ENSRNOG00000007545	ENSRNOG00000005331	ENSRNOG00000005250	ENSRNOG00000013505	ENSRNOG00000025053	ENSRNOG00000047503	ENSRNOG00000003500	ENSRNOG00000019077	ENSRNOG00000050521	ENSRNOG00000053769	ENSRNOG00000042044	ENSRNOG00000020713	ENSRNOG00000009946	ENSRNOG00000014765	ENSRNOG00000017579	ENSRNOG00000017188	ENSRNOG00000008638	ENSRNOG00000005420	ENSRNOG00000056184	ENSRNOG00000019409
Oxytocin signaling pathway	ENSRNOG00000052795	ENSRNOG00000043210	ENSRNOG00000029876	ENSRNOG00000049768	ENSRNOG00000033134	ENSRNOG00000013869	ENSRNOG00000004720	ENSRNOG00000004060	ENSRNOG00000002525	ENSRNOG00000047907	ENSRNOG00000004518	ENSRNOG00000028837	ENSRNOG00000009783	ENSRNOG00000003069	ENSRNOG00000033531	ENSRNOG00000002215	ENSRNOG00000004890	ENSRNOG00000021789	ENSRNOG00000009338	ENSRNOG00000016770	ENSRNOG00000006470	ENSRNOG00000012175	ENSRNOG00000018708	ENSRNOG00000001309	ENSRNOG00000004810	ENSRNOG00000011589	ENSRNOG00000023079	ENSRNOG00000019465	ENSRNOG00000001142	ENSRNOG00000009495	ENSRNOG00000012060	ENSRNOG00000017546	ENSRNOG00000057852	ENSRNOG00000007706	ENSRNOG00000003262	ENSRNOG00000018378	ENSRNOG00000021150	ENSRNOG00000015991	ENSRNOG00000008235	ENSRNOG00000001979	ENSRNOG00000058337	ENSRNOG00000003245	ENSRNOG00000004496	ENSRNOG00000026764	ENSRNOG00000002412	ENSRNOG00000013147	ENSRNOG00000007645	ENSRNOG00000004925	ENSRNOG00000053452
Starch and sucrose metabolism	ENSRNOG00000051232	ENSRNOG00000002185	ENSRNOG00000023150	ENSRNOG00000051171	ENSRNOG00000061527	ENSRNOG00000007583	ENSRNOG00000009889	ENSRNOG00000006116	ENSRNOG00000046891	ENSRNOG00000033529	ENSRNOG00000026177	ENSRNOG00000050620	ENSRNOG00000047656	ENSRNOG00000020902	ENSRNOG00000008079	ENSRNOG00000006388	ENSRNOG00000031067	ENSRNOG00000017079	ENSRNOG00000013791	ENSRNOG00000059753	ENSRNOG00000052010	ENSRNOG00000016214	ENSRNOG00000011146	ENSRNOG00000024634	ENSRNOG00000049045	ENSRNOG00000020812	ENSRNOG00000013994	ENSRNOG00000055613	ENSRNOG00000021090	ENSRNOG00000024563	ENSRNOG00000026235
Apelin signaling pathway	ENSRNOG00000043451	ENSRNOG00000052795	ENSRNOG00000049768	ENSRNOG00000033134	ENSRNOG00000020513	ENSRNOG00000004060	ENSRNOG00000015086	ENSRNOG00000038076	ENSRNOG00000025040	ENSRNOG00000002215	ENSRNOG00000004890	ENSRNOG00000019422	ENSRNOG00000021497	ENSRNOG00000021789	ENSRNOG00000003919	ENSRNOG00000009338	ENSRNOG00000047914	ENSRNOG00000016770	ENSRNOG00000017840	ENSRNOG00000004346	ENSRNOG00000007443	ENSRNOG00000004810	ENSRNOG00000015603	ENSRNOG00000020372	ENSRNOG00000000613	ENSRNOG00000023079	ENSRNOG00000019465	ENSRNOG00000001142	ENSRNOG00000009227	ENSRNOG00000017546	ENSRNOG00000018677	ENSRNOG00000020400	ENSRNOG00000007706	ENSRNOG00000046239	ENSRNOG00000050469	ENSRNOG00000039562	ENSRNOG00000021150	ENSRNOG00000008235	ENSRNOG00000047799	ENSRNOG00000007036	ENSRNOG00000058337	ENSRNOG00000007982	ENSRNOG00000016701	ENSRNOG00000033345	ENSRNOG00000004473	ENSRNOG00000012258	ENSRNOG00000049124	ENSRNOG00000023428	ENSRNOG00000001130
Human papillomavirus infection	ENSRNOG00000002548	ENSRNOG00000043451	ENSRNOG00000000485	ENSRNOG00000004861	ENSRNOG00000049590	ENSRNOG00000048472	ENSRNOG00000000763	ENSRNOG00000051964	ENSRNOG00000002767	ENSRNOG00000002978	ENSRNOG00000011300	ENSRNOG00000048951	ENSRNOG00000031090	ENSRNOG00000000837	ENSRNOG00000050998	ENSRNOG00000000723	ENSRNOG00000000840	ENSRNOG00000050183	ENSRNOG00000039744	ENSRNOG00000031607	ENSRNOG00000061639	ENSRNOG00000017235	ENSRNOG00000002667	ENSRNOG00000002680	ENSRNOG00000012582	ENSRNOG00000001992	ENSRNOG00000014851	ENSRNOG00000029001	ENSRNOG00000029386	ENSRNOG00000045924	ENSRNOG00000000795	ENSRNOG00000042905	ENSRNOG00000032596	ENSRNOG00000000787	ENSRNOG00000000777	ENSRNOG00000033136	ENSRNOG00000000442	ENSRNOG00000060412	ENSRNOG00000047035	ENSRNOG00000040052	ENSRNOG00000022107	ENSRNOG00000059770	ENSRNOG00000047706	ENSRNOG00000018835	ENSRNOG00000030712	ENSRNOG00000038999	ENSRNOG00000002468	ENSRNOG00000002525	ENSRNOG00000011470
Growth hormone synthesis, secretion and action	ENSRNOG00000017801	ENSRNOG00000052795	ENSRNOG00000002079	ENSRNOG00000000513	ENSRNOG00000000515	ENSRNOG00000049768	ENSRNOG00000000431	ENSRNOG00000005413	ENSRNOG00000008622	ENSRNOG00000004890	ENSRNOG00000023493	ENSRNOG00000021497	ENSRNOG00000009338	ENSRNOG00000061910	ENSRNOG00000016846	ENSRNOG00000019496	ENSRNOG00000019742	ENSRNOG00000002793	ENSRNOG00000003834	ENSRNOG00000006984	ENSRNOG00000004437	ENSRNOG00000013177	ENSRNOG00000004810	ENSRNOG00000059968	ENSRNOG00000023079	ENSRNOG00000019465	ENSRNOG00000002946	ENSRNOG00000018677	ENSRNOG00000025792	ENSRNOG00000001868	ENSRNOG00000021150	ENSRNOG00000015654	ENSRNOG00000058337	ENSRNOG00000020657	ENSRNOG00000000145	ENSRNOG00000019075	ENSRNOG00000013147	ENSRNOG00000051986	ENSRNOG00000002833	ENSRNOG00000012826	ENSRNOG00000020155	ENSRNOG00000004826	ENSRNOG00000056810	ENSRNOG00000014079	ENSRNOG00000023622	ENSRNOG00000000190	ENSRNOG00000057096	ENSRNOG00000008030	ENSRNOG00000056371
Estrogen signaling pathway	ENSRNOG00000017801	ENSRNOG00000052795	ENSRNOG00000010970	ENSRNOG00000011196	ENSRNOG00000033617	ENSRNOG00000011628	ENSRNOG00000011846	ENSRNOG00000030170	ENSRNOG00000049768	ENSRNOG00000011986	ENSRNOG00000027139	ENSRNOG00000011907	ENSRNOG00000031422	ENSRNOG00000019358	ENSRNOG00000005343	ENSRNOG00000013896	ENSRNOG00000002791	ENSRNOG00000045654	ENSRNOG00000000774	ENSRNOG00000047966	ENSRNOG00000050647	ENSRNOG00000051302	ENSRNOG00000030344	ENSRNOG00000013611	ENSRNOG00000013754	ENSRNOG00000031805	ENSRNOG00000014070	ENSRNOG00000014099	ENSRNOG00000014441	ENSRNOG00000026371	ENSRNOG00000003899	ENSRNOG00000014233	ENSRNOG00000061636	ENSRNOG00000014370	ENSRNOG00000034087	ENSRNOG00000018191	ENSRNOG00000047393	ENSRNOG00000000431	ENSRNOG00000004060	ENSRNOG00000016346	ENSRNOG00000005413	ENSRNOG00000008622	ENSRNOG00000022523	ENSRNOG00000004890	ENSRNOG00000023493	ENSRNOG00000021497	ENSRNOG00000009338	ENSRNOG00000016770	ENSRNOG00000016846
Prostate cancer	ENSRNOG00000017801	ENSRNOG00000051964	ENSRNOG00000029148	ENSRNOG00000057702	ENSRNOG00000029273	ENSRNOG00000002791	ENSRNOG00000005639	ENSRNOG00000030888	ENSRNOG00000014753	ENSRNOG00000012944	ENSRNOG00000005413	ENSRNOG00000008622	ENSRNOG00000018461	ENSRNOG00000010695	ENSRNOG00000023493	ENSRNOG00000021497	ENSRNOG00000001312	ENSRNOG00000009338	ENSRNOG00000016846	ENSRNOG00000032626	ENSRNOG00000016029	ENSRNOG00000023079	ENSRNOG00000018677	ENSRNOG00000047741	ENSRNOG00000027042	ENSRNOG00000013993	ENSRNOG00000019834	ENSRNOG00000000145	ENSRNOG00000022485	ENSRNOG00000006450	ENSRNOG00000002833	ENSRNOG00000017539	ENSRNOG00000012826	ENSRNOG00000004826	ENSRNOG00000056810	ENSRNOG00000007219	ENSRNOG00000010957	ENSRNOG00000023622	ENSRNOG00000000190	ENSRNOG00000056371	ENSRNOG00000001849	ENSRNOG00000018237	ENSRNOG00000014378	ENSRNOG00000037360	ENSRNOG00000002244	ENSRNOG00000016384	ENSRNOG00000016050	ENSRNOG00000005872	ENSRNOG00000049232
Herpes simplex infection	ENSRNOG00000037421	ENSRNOG00000017285	ENSRNOG00000000485	ENSRNOG00000051078	ENSRNOG00000049590	ENSRNOG00000000511	ENSRNOG00000000520	ENSRNOG00000000763	ENSRNOG00000026669	ENSRNOG00000026762	ENSRNOG00000047854	ENSRNOG00000002978	ENSRNOG00000049491	ENSRNOG00000001050	ENSRNOG00000051442	ENSRNOG00000000457	ENSRNOG00000002791	ENSRNOG00000018899	ENSRNOG00000048951	ENSRNOG00000000455	ENSRNOG00000031090	ENSRNOG00000000454	ENSRNOG00000000837	ENSRNOG00000050998	ENSRNOG00000000723	ENSRNOG00000000838	ENSRNOG00000050183	ENSRNOG00000039744	ENSRNOG00000032708	ENSRNOG00000031607	ENSRNOG00000061639	ENSRNOG00000010906	ENSRNOG00000000451	ENSRNOG00000033215	ENSRNOG00000049137	ENSRNOG00000037251	ENSRNOG00000012582	ENSRNOG00000001039	ENSRNOG00000030431	ENSRNOG00000032844	ENSRNOG00000029001	ENSRNOG00000029386	ENSRNOG00000051152	ENSRNOG00000022730	ENSRNOG00000046629	ENSRNOG00000045924	ENSRNOG00000000795	ENSRNOG00000042905	ENSRNOG00000032596
Fatty acid metabolism	ENSRNOG00000013975	ENSRNOG00000000435	ENSRNOG00000028448	ENSRNOG00000038761	ENSRNOG00000000466	ENSRNOG00000021808	ENSRNOG00000045947	ENSRNOG00000006331	ENSRNOG00000012966	ENSRNOG00000034013	ENSRNOG00000012443	ENSRNOG00000015077	ENSRNOG00000005772	ENSRNOG00000024411	ENSRNOG00000045636	ENSRNOG00000019124	ENSRNOG00000009630	ENSRNOG00000010450	ENSRNOG00000013766	ENSRNOG00000010697	ENSRNOG00000032554	ENSRNOG00000008755	ENSRNOG00000001177	ENSRNOG00000010539	ENSRNOG00000010633	ENSRNOG00000020480	ENSRNOG00000001770	ENSRNOG00000020624	ENSRNOG00000047549	ENSRNOG00000024629	ENSRNOG00000013552	ENSRNOG00000009773	ENSRNOG00000016265	ENSRNOG00000012616	ENSRNOG00000008474	ENSRNOG00000018522	ENSRNOG00000020440	ENSRNOG00000011413	ENSRNOG00000026745	ENSRNOG00000005993	ENSRNOG00000011381	ENSRNOG00000013279	ENSRNOG00000010468	ENSRNOG00000009845	ENSRNOG00000026163	ENSRNOG00000010438	ENSRNOG00000030232	ENSRNOG00000014254	ENSRNOG00000043192
Aldosterone synthesis and secretion	ENSRNOG00000017801	ENSRNOG00000052795	ENSRNOG00000007607	ENSRNOG00000049768	ENSRNOG00000001079	ENSRNOG00000002934	ENSRNOG00000000428	ENSRNOG00000000431	ENSRNOG00000004060	ENSRNOG00000009783	ENSRNOG00000005413	ENSRNOG00000008622	ENSRNOG00000004890	ENSRNOG00000023493	ENSRNOG00000016770	ENSRNOG00000006470	ENSRNOG00000042884	ENSRNOG00000004810	ENSRNOG00000015603	ENSRNOG00000011589	ENSRNOG00000015052	ENSRNOG00000003031	ENSRNOG00000061088	ENSRNOG00000033893	ENSRNOG00000021150	ENSRNOG00000009790	ENSRNOG00000058337	ENSRNOG00000061304	ENSRNOG00000013147	ENSRNOG00000012826	ENSRNOG00000030269	ENSRNOG00000004165	ENSRNOG00000019441	ENSRNOG00000025889	ENSRNOG00000018346	ENSRNOG00000000981	ENSRNOG00000020401	ENSRNOG00000005600	ENSRNOG00000021781	ENSRNOG00000052080	ENSRNOG00000014776	ENSRNOG00000030019	ENSRNOG00000060528	ENSRNOG00000060463	ENSRNOG00000018445	ENSRNOG00000031955	ENSRNOG00000016452	ENSRNOG00000003491	ENSRNOG00000020263
Fat digestion and absorption	ENSRNOG00000000510	ENSRNOG00000005906	ENSRNOG00000043176	ENSRNOG00000040108	ENSRNOG00000000437	ENSRNOG00000049955	ENSRNOG00000057470	ENSRNOG00000010406	ENSRNOG00000017725	ENSRNOG00000017908	ENSRNOG00000008116	ENSRNOG00000018126	ENSRNOG00000019466	ENSRNOG00000049161	ENSRNOG00000005542	ENSRNOG00000016798	ENSRNOG00000055909	ENSRNOG00000000981	ENSRNOG00000045679	ENSRNOG00000003164	ENSRNOG00000016826	ENSRNOG00000001153	ENSRNOG00000027228	ENSRNOG00000000177	ENSRNOG00000005250	ENSRNOG00000006675	ENSRNOG00000017982	ENSRNOG00000025121	ENSRNOG00000009980	ENSRNOG00000016838	ENSRNOG00000019448	ENSRNOG00000010655	ENSRNOG00000046619	ENSRNOG00000028711	ENSRNOG00000029211	ENSRNOG00000011782	ENSRNOG00000005420	ENSRNOG00000025444	ENSRNOG00000016945	ENSRNOG00000016573	ENSRNOG00000016647	ENSRNOG00000024947
Fatty acid biosynthesis	ENSRNOG00000000466	ENSRNOG00000045947	ENSRNOG00000034013	ENSRNOG00000015077	ENSRNOG00000024411	ENSRNOG00000045636	ENSRNOG00000000658	ENSRNOG00000010539	ENSRNOG00000010633	ENSRNOG00000047549	ENSRNOG00000016265	ENSRNOG00000026745	ENSRNOG00000005993	ENSRNOG00000011381	ENSRNOG00000019180	ENSRNOG00000014718	ENSRNOG00000016403	ENSRNOG00000028047
Drug metabolism - cytochrome P450	ENSRNOG00000028746	ENSRNOG00000012801	ENSRNOG00000049964	ENSRNOG00000001980	ENSRNOG00000046540	ENSRNOG00000001990	ENSRNOG00000015354	ENSRNOG00000062125	ENSRNOG00000014555	ENSRNOG00000025119	ENSRNOG00000013484	ENSRNOG00000033402	ENSRNOG00000006583	ENSRNOG00000024755	ENSRNOG00000019017	ENSRNOG00000003400	ENSRNOG00000019058	ENSRNOG00000060939	ENSRNOG00000016484	ENSRNOG00000017872	ENSRNOG00000018076	ENSRNOG00000038300	ENSRNOG00000019221	ENSRNOG00000012458	ENSRNOG00000029726	ENSRNOG00000007743	ENSRNOG00000016173	ENSRNOG00000061857	ENSRNOG00000018237	ENSRNOG00000004245	ENSRNOG00000034191	ENSRNOG00000043014	ENSRNOG00000003510	ENSRNOG00000033923	ENSRNOG00000001973	ENSRNOG00000029778	ENSRNOG00000042714	ENSRNOG00000046357	ENSRNOG00000002848	ENSRNOG00000038499	ENSRNOG00000003620	ENSRNOG00000047108	ENSRNOG00000052070	ENSRNOG00000052415	ENSRNOG00000049771	ENSRNOG00000000201	ENSRNOG00000056847	ENSRNOG00000012436	ENSRNOG00000032959
Cytokine-cytokine receptor interaction	ENSRNOG00000007810	ENSRNOG00000032208	ENSRNOG00000014269	ENSRNOG00000048239	ENSRNOG00000016804	ENSRNOG00000006934	ENSRNOG00000020142	ENSRNOG00000002968	ENSRNOG00000026607	ENSRNOG00000002978	ENSRNOG00000014464	ENSRNOG00000051120	ENSRNOG00000000837	ENSRNOG00000000836	ENSRNOG00000000838	ENSRNOG00000010906	ENSRNOG00000038483	ENSRNOG00000028548	ENSRNOG00000003954	ENSRNOG00000030021	ENSRNOG00000011205	ENSRNOG00000011406	ENSRNOG00000023664	ENSRNOG00000005334	ENSRNOG00000003305	ENSRNOG00000059979	ENSRNOG00000049115	ENSRNOG00000013018	ENSRNOG00000028377	ENSRNOG00000016307	ENSRNOG00000039075	ENSRNOG00000047649	ENSRNOG00000008111	ENSRNOG00000014320	ENSRNOG00000017386	ENSRNOG00000017376	ENSRNOG00000012430	ENSRNOG00000007002	ENSRNOG00000020275	ENSRNOG00000004633	ENSRNOG00000019695	ENSRNOG00000049782	ENSRNOG00000052145	ENSRNOG00000005722	ENSRNOG00000018488	ENSRNOG00000059640	ENSRNOG00000014477	ENSRNOG00000006268	ENSRNOG00000017185
IL-17 signaling pathway	ENSRNOG00000002079	ENSRNOG00000000513	ENSRNOG00000000515	ENSRNOG00000016804	ENSRNOG00000051120	ENSRNOG00000000837	ENSRNOG00000047035	ENSRNOG00000002525	ENSRNOG00000008111	ENSRNOG00000001573	ENSRNOG00000047907	ENSRNOG00000030888	ENSRNOG00000019695	ENSRNOG00000013007	ENSRNOG00000026805	ENSRNOG00000046667	ENSRNOG00000010278	ENSRNOG00000019846	ENSRNOG00000032626	ENSRNOG00000007652	ENSRNOG00000006984	ENSRNOG00000011483	ENSRNOG00000016054	ENSRNOG00000000595	ENSRNOG00000012467	ENSRNOG00000002843	ENSRNOG00000008145	ENSRNOG00000057347	ENSRNOG00000007468	ENSRNOG00000019834	ENSRNOG00000002412	ENSRNOG00000022485	ENSRNOG00000019568	ENSRNOG00000048515	ENSRNOG00000012331	ENSRNOG00000002833	ENSRNOG00000017539	ENSRNOG00000020155	ENSRNOG00000007159	ENSRNOG00000015401	ENSRNOG00000007219	ENSRNOG00000020552	ENSRNOG00000001849	ENSRNOG00000002823	ENSRNOG00000050323	ENSRNOG00000003643	ENSRNOG00000013169	ENSRNOG00000015498	ENSRNOG00000009204
Focal adhesion	ENSRNOG00000002548	ENSRNOG00000043451	ENSRNOG00000004861	ENSRNOG00000002079	ENSRNOG00000048472	ENSRNOG00000051964	ENSRNOG00000000596	ENSRNOG00000029148	ENSRNOG00000019883	ENSRNOG00000002791	ENSRNOG00000011300	ENSRNOG00000001068	ENSRNOG00000002667	ENSRNOG00000002680	ENSRNOG00000014851	ENSRNOG00000002468	ENSRNOG00000005798	ENSRNOG00000018461	ENSRNOG00000010695	ENSRNOG00000002215	ENSRNOG00000021497	ENSRNOG00000021789	ENSRNOG00000001312	ENSRNOG00000005580	ENSRNOG00000048172	ENSRNOG00000016846	ENSRNOG00000007048	ENSRNOG00000012208	ENSRNOG00000014316	ENSRNOG00000018708	ENSRNOG00000052745	ENSRNOG00000016630	ENSRNOG00000007350	ENSRNOG00000018951	ENSRNOG00000015733	ENSRNOG00000007925	ENSRNOG00000009495	ENSRNOG00000057713	ENSRNOG00000017546	ENSRNOG00000018677	ENSRNOG00000010031	ENSRNOG00000054945	ENSRNOG00000016538	ENSRNOG00000031782	ENSRNOG00000019598	ENSRNOG00000019688	ENSRNOG00000025792	ENSRNOG00000013536	ENSRNOG00000001868
Circadian entrainment	ENSRNOG00000052795	ENSRNOG00000029876	ENSRNOG00000049768	ENSRNOG00000018413	ENSRNOG00000004060	ENSRNOG00000009783	ENSRNOG00000025040	ENSRNOG00000004890	ENSRNOG00000028744	ENSRNOG00000047914	ENSRNOG00000016770	ENSRNOG00000004362	ENSRNOG00000004810	ENSRNOG00000011589	ENSRNOG00000019465	ENSRNOG00000012060	ENSRNOG00000033893	ENSRNOG00000050469	ENSRNOG00000039562	ENSRNOG00000021150	ENSRNOG00000047799	ENSRNOG00000058337	ENSRNOG00000013147	ENSRNOG00000016701	ENSRNOG00000007645	ENSRNOG00000008972	ENSRNOG00000012098	ENSRNOG00000001130	ENSRNOG00000057096	ENSRNOG00000001849	ENSRNOG00000025889	ENSRNOG00000020401	ENSRNOG00000042929	ENSRNOG00000005369	ENSRNOG00000052080	ENSRNOG00000003280	ENSRNOG00000014776	ENSRNOG00000038205	ENSRNOG00000048980	ENSRNOG00000060528	ENSRNOG00000020557	ENSRNOG00000008766	ENSRNOG00000031955	ENSRNOG00000007387	ENSRNOG00000003491	ENSRNOG00000019482	ENSRNOG00000021063	ENSRNOG00000016592	ENSRNOG00000009440
Glycosaminoglycan degradation	ENSRNOG00000000043	ENSRNOG00000011150	ENSRNOG00000032381	ENSRNOG00000059911	ENSRNOG00000007212	ENSRNOG00000047350	ENSRNOG00000016093	ENSRNOG00000021695	ENSRNOG00000046159	ENSRNOG00000000913	ENSRNOG00000010196	ENSRNOG00000001465	ENSRNOG00000014461	ENSRNOG00000039466	ENSRNOG00000049552	ENSRNOG00000010252	ENSRNOG00000031420	ENSRNOG00000015858	ENSRNOG00000002188	ENSRNOG00000043120	ENSRNOG00000025274	ENSRNOG00000007231
Glycosphingolipid biosynthesis - globo and isoglobo series	ENSRNOG00000008209	ENSRNOG00000030983	ENSRNOG00000012019	ENSRNOG00000020995	ENSRNOG00000009736	ENSRNOG00000008475	ENSRNOG00000008064	ENSRNOG00000011513	ENSRNOG00000021011	ENSRNOG00000021014	ENSRNOG00000014018	ENSRNOG00000005935	ENSRNOG00000017932	ENSRNOG00000010252	ENSRNOG00000025274
Gastric cancer	ENSRNOG00000000485	ENSRNOG00000000464	ENSRNOG00000051964	ENSRNOG00000029273	ENSRNOG00000002791	ENSRNOG00000004500	ENSRNOG00000061530	ENSRNOG00000024061	ENSRNOG00000020899	ENSRNOG00000061031	ENSRNOG00000014753	ENSRNOG00000015380	ENSRNOG00000000373	ENSRNOG00000000378	ENSRNOG00000021497	ENSRNOG00000017409	ENSRNOG00000046602	ENSRNOG00000051905	ENSRNOG00000003919	ENSRNOG00000009338	ENSRNOG00000016846	ENSRNOG00000017106	ENSRNOG00000033791	ENSRNOG00000015618	ENSRNOG00000008168	ENSRNOG00000014385	ENSRNOG00000019423	ENSRNOG00000004660	ENSRNOG00000016029	ENSRNOG00000052745	ENSRNOG00000061238	ENSRNOG00000016119	ENSRNOG00000003807	ENSRNOG00000015562	ENSRNOG00000025327	ENSRNOG00000023079	ENSRNOG00000054121	ENSRNOG00000061818	ENSRNOG00000015982	ENSRNOG00000018677	ENSRNOG00000047741	ENSRNOG00000017915	ENSRNOG00000007036	ENSRNOG00000013993	ENSRNOG00000013090	ENSRNOG00000020657	ENSRNOG00000052205	ENSRNOG00000000145	ENSRNOG00000006450
Insulin secretion	ENSRNOG00000017801	ENSRNOG00000052795	ENSRNOG00000049768	ENSRNOG00000002934	ENSRNOG00000005726	ENSRNOG00000000431	ENSRNOG00000009783	ENSRNOG00000005413	ENSRNOG00000008622	ENSRNOG00000004890	ENSRNOG00000023493	ENSRNOG00000061527	ENSRNOG00000005465	ENSRNOG00000024517	ENSRNOG00000029165	ENSRNOG00000006989	ENSRNOG00000019440	ENSRNOG00000004810	ENSRNOG00000011589	ENSRNOG00000020714	ENSRNOG00000021150	ENSRNOG00000058337	ENSRNOG00000029264	ENSRNOG00000013147	ENSRNOG00000019433	ENSRNOG00000012826	ENSRNOG00000012098	ENSRNOG00000025889	ENSRNOG00000020401	ENSRNOG00000052080	ENSRNOG00000014776	ENSRNOG00000030019	ENSRNOG00000001516	ENSRNOG00000016452	ENSRNOG00000003491	ENSRNOG00000020263	ENSRNOG00000005985	ENSRNOG00000016469	ENSRNOG00000010348	ENSRNOG00000032150	ENSRNOG00000007090	ENSRNOG00000006037	ENSRNOG00000019321	ENSRNOG00000020405	ENSRNOG00000007290	ENSRNOG00000006306	ENSRNOG00000007284	ENSRNOG00000049882	ENSRNOG00000002229
Bladder cancer	ENSRNOG00000051964	ENSRNOG00000029273	ENSRNOG00000004500	ENSRNOG00000009338	ENSRNOG00000032394	ENSRNOG00000004362	ENSRNOG00000016029	ENSRNOG00000018198	ENSRNOG00000023079	ENSRNOG00000009495	ENSRNOG00000047741	ENSRNOG00000018646	ENSRNOG00000019598	ENSRNOG00000013593	ENSRNOG00000006450	ENSRNOG00000017539	ENSRNOG00000010957	ENSRNOG00000025602	ENSRNOG00000001849	ENSRNOG00000017332	ENSRNOG00000006304	ENSRNOG00000032353	ENSRNOG00000020005	ENSRNOG00000045829	ENSRNOG00000016611	ENSRNOG00000010153	ENSRNOG00000010838	ENSRNOG00000059837	ENSRNOG00000008881	ENSRNOG00000020918	ENSRNOG00000016695	ENSRNOG00000046657	ENSRNOG00000020151	ENSRNOG00000053979	ENSRNOG00000004332	ENSRNOG00000030665	ENSRNOG00000016708	ENSRNOG00000049238	ENSRNOG00000010176	ENSRNOG00000021548	ENSRNOG00000016818	ENSRNOG00000053583	ENSRNOG00000000521	ENSRNOG00000055895	ENSRNOG00000020383	ENSRNOG00000010756
Various types of N-glycan biosynthesis	ENSRNOG00000005753	ENSRNOG00000017087	ENSRNOG00000004149	ENSRNOG00000010877	ENSRNOG00000010344	ENSRNOG00000009090	ENSRNOG00000003695	ENSRNOG00000004234	ENSRNOG00000002883	ENSRNOG00000011528	ENSRNOG00000012841	ENSRNOG00000008451	ENSRNOG00000007492	ENSRNOG00000001712	ENSRNOG00000015867	ENSRNOG00000012055	ENSRNOG00000011922	ENSRNOG00000000800	ENSRNOG00000022919	ENSRNOG00000046345	ENSRNOG00000006369	ENSRNOG00000036667	ENSRNOG00000018276	ENSRNOG00000031896	ENSRNOG00000059461	ENSRNOG00000013061	ENSRNOG00000015226	ENSRNOG00000004591	ENSRNOG00000031208	ENSRNOG00000015439	ENSRNOG00000003235	ENSRNOG00000015079	ENSRNOG00000019843	ENSRNOG00000010252	ENSRNOG00000019609	ENSRNOG00000053075	ENSRNOG00000003551	ENSRNOG00000025274	ENSRNOG00000012559
Renin-angiotensin system	ENSRNOG00000051061	ENSRNOG00000007467	ENSRNOG00000062101	ENSRNOG00000002937	ENSRNOG00000020563	ENSRNOG00000010630	ENSRNOG00000024785	ENSRNOG00000020647	ENSRNOG00000047662	ENSRNOG00000055229	ENSRNOG00000055072	ENSRNOG00000049991	ENSRNOG00000045980	ENSRNOG00000014971	ENSRNOG00000029237	ENSRNOG00000053494	ENSRNOG00000046297	ENSRNOG00000046267	ENSRNOG00000018346	ENSRNOG00000033414	ENSRNOG00000046670	ENSRNOG00000050006	ENSRNOG00000018445	ENSRNOG00000050460	ENSRNOG00000048630	ENSRNOG00000051854	ENSRNOG00000003858	ENSRNOG00000031304	ENSRNOG00000010640	ENSRNOG00000031665	ENSRNOG00000049096	ENSRNOG00000013448	ENSRNOG00000014610	ENSRNOG00000011181	ENSRNOG00000015857	ENSRNOG00000011561	ENSRNOG00000032857	ENSRNOG00000054979	ENSRNOG00000050893	ENSRNOG00000019924	ENSRNOG00000009514	ENSRNOG00000049279	ENSRNOG00000048901	ENSRNOG00000047387
Breast cancer	ENSRNOG00000000485	ENSRNOG00000001111	ENSRNOG00000051964	ENSRNOG00000019358	ENSRNOG00000005343	ENSRNOG00000029273	ENSRNOG00000002227	ENSRNOG00000019338	ENSRNOG00000004500	ENSRNOG00000000442	ENSRNOG00000061530	ENSRNOG00000018835	ENSRNOG00000020899	ENSRNOG00000061031	ENSRNOG00000014753	ENSRNOG00000021497	ENSRNOG00000017409	ENSRNOG00000051905	ENSRNOG00000003919	ENSRNOG00000009338	ENSRNOG00000016846	ENSRNOG00000017106	ENSRNOG00000033791	ENSRNOG00000015618	ENSRNOG00000008168	ENSRNOG00000014385	ENSRNOG00000004346	ENSRNOG00000019423	ENSRNOG00000007443	ENSRNOG00000004660	ENSRNOG00000016029	ENSRNOG00000061238	ENSRNOG00000016119	ENSRNOG00000003807	ENSRNOG00000023079	ENSRNOG00000061818	ENSRNOG00000015982	ENSRNOG00000018677	ENSRNOG00000047741	ENSRNOG00000001720	ENSRNOG00000017915	ENSRNOG00000013993	ENSRNOG00000013090	ENSRNOG00000020657	ENSRNOG00000052205	ENSRNOG00000000145	ENSRNOG00000006450	ENSRNOG00000011593	ENSRNOG00000002833
Amino sugar and nucleotide sugar metabolism	ENSRNOG00000002185	ENSRNOG00000023150	ENSRNOG00000009148	ENSRNOG00000013911	ENSRNOG00000005358	ENSRNOG00000019946	ENSRNOG00000061527	ENSRNOG00000002926	ENSRNOG00000045605	ENSRNOG00000009592	ENSRNOG00000018507	ENSRNOG00000059453	ENSRNOG00000014365	ENSRNOG00000008641	ENSRNOG00000017605	ENSRNOG00000009889	ENSRNOG00000033162	ENSRNOG00000010024	ENSRNOG00000002177	ENSRNOG00000014766	ENSRNOG00000006116	ENSRNOG00000046891	ENSRNOG00000047213	ENSRNOG00000028072	ENSRNOG00000002775	ENSRNOG00000009515	ENSRNOG00000013816	ENSRNOG00000018898	ENSRNOG00000054765	ENSRNOG00000006359	ENSRNOG00000003094	ENSRNOG00000008079	ENSRNOG00000012960	ENSRNOG00000009712	ENSRNOG00000006460	ENSRNOG00000009548	ENSRNOG00000008307	ENSRNOG00000002643	ENSRNOG00000002810	ENSRNOG00000003973	ENSRNOG00000017574	ENSRNOG00000002615	ENSRNOG00000008945	ENSRNOG00000010252	ENSRNOG00000037229	ENSRNOG00000009020	ENSRNOG00000025274	ENSRNOG00000049045	ENSRNOG00000019751
Hippo signaling pathway - multiple species	ENSRNOG00000028335	ENSRNOG00000047473	ENSRNOG00000010996	ENSRNOG00000000506	ENSRNOG00000015488	ENSRNOG00000011278	ENSRNOG00000056343	ENSRNOG00000020695	ENSRNOG00000002866	ENSRNOG00000013076	ENSRNOG00000004837	ENSRNOG00000005608	ENSRNOG00000023296	ENSRNOG00000007329	ENSRNOG00000029784	ENSRNOG00000031643	ENSRNOG00000013526	ENSRNOG00000005933	ENSRNOG00000012791	ENSRNOG00000008065	ENSRNOG00000005264	ENSRNOG00000021548	ENSRNOG00000014916	ENSRNOG00000016617	ENSRNOG00000059474	ENSRNOG00000021261	ENSRNOG00000007948
Thyroid hormone synthesis	ENSRNOG00000011081	ENSRNOG00000017801	ENSRNOG00000052795	ENSRNOG00000006104	ENSRNOG00000049768	ENSRNOG00000003972	ENSRNOG00000002934	ENSRNOG00000000431	ENSRNOG00000039777	ENSRNOG00000005413	ENSRNOG00000008622	ENSRNOG00000004890	ENSRNOG00000023493	ENSRNOG00000004810	ENSRNOG00000055672	ENSRNOG00000052564	ENSRNOG00000021150	ENSRNOG00000058337	ENSRNOG00000030726	ENSRNOG00000026203	ENSRNOG00000048812	ENSRNOG00000009751	ENSRNOG00000058692	ENSRNOG00000012826	ENSRNOG00000004646	ENSRNOG00000016275	ENSRNOG00000025889	ENSRNOG00000020401	ENSRNOG00000014776	ENSRNOG00000030019	ENSRNOG00000057180	ENSRNOG00000016452	ENSRNOG00000003491	ENSRNOG00000020263	ENSRNOG00000016469	ENSRNOG00000032150	ENSRNOG00000017805	ENSRNOG00000003343	ENSRNOG00000018294	ENSRNOG00000007290	ENSRNOG00000053339	ENSRNOG00000060749	ENSRNOG00000002229	ENSRNOG00000001804	ENSRNOG00000002911	ENSRNOG00000003999	ENSRNOG00000010461	ENSRNOG00000047374	ENSRNOG00000016286
Wnt signaling pathway	ENSRNOG00000002572	ENSRNOG00000002079	ENSRNOG00000043210	ENSRNOG00000005310	ENSRNOG00000007078	ENSRNOG00000001068	ENSRNOG00000004500	ENSRNOG00000000847	ENSRNOG00000005093	ENSRNOG00000005715	ENSRNOG00000022772	ENSRNOG00000015143	ENSRNOG00000061031	ENSRNOG00000014753	ENSRNOG00000009783	ENSRNOG00000002413	ENSRNOG00000038174	ENSRNOG00000009662	ENSRNOG00000045764	ENSRNOG00000010518	ENSRNOG00000017409	ENSRNOG00000051905	ENSRNOG00000016477	ENSRNOG00000048172	ENSRNOG00000009656	ENSRNOG00000017106	ENSRNOG00000003686	ENSRNOG00000004345	ENSRNOG00000000503	ENSRNOG00000012175	ENSRNOG00000033791	ENSRNOG00000015618	ENSRNOG00000008168	ENSRNOG00000014385	ENSRNOG00000009110	ENSRNOG00000019423	ENSRNOG00000004476	ENSRNOG00000004660	ENSRNOG00000010507	ENSRNOG00000061238	ENSRNOG00000016119	ENSRNOG00000003807	ENSRNOG00000004810	ENSRNOG00000005428	ENSRNOG00000007350	ENSRNOG00000011589	ENSRNOG00000053945	ENSRNOG00000061818	ENSRNOG00000015982
Arachidonic acid metabolism	ENSRNOG00000049911	ENSRNOG00000049693	ENSRNOG00000047848	ENSRNOG00000001701	ENSRNOG00000062276	ENSRNOG00000047697	ENSRNOG00000024016	ENSRNOG00000049464	ENSRNOG00000030466	ENSRNOG00000002525	ENSRNOG00000038361	ENSRNOG00000002642	ENSRNOG00000006583	ENSRNOG00000031529	ENSRNOG00000001466	ENSRNOG00000004494	ENSRNOG00000057470	ENSRNOG00000021735	ENSRNOG00000007415	ENSRNOG00000055672	ENSRNOG00000052564	ENSRNOG00000013291	ENSRNOG00000003244	ENSRNOG00000033680	ENSRNOG00000014050	ENSRNOG00000008245	ENSRNOG00000026764	ENSRNOG00000006320	ENSRNOG00000020775	ENSRNOG00000009597	ENSRNOG00000048812	ENSRNOG00000009751	ENSRNOG00000012458	ENSRNOG00000052810	ENSRNOG00000037231	ENSRNOG00000046080	ENSRNOG00000021405	ENSRNOG00000015550	ENSRNOG00000016798	ENSRNOG00000012972	ENSRNOG00000013468	ENSRNOG00000021206	ENSRNOG00000012295	ENSRNOG00000003164	ENSRNOG00000057180	ENSRNOG00000016826	ENSRNOG00000001153	ENSRNOG00000020801	ENSRNOG00000021924
Synaptic vesicle cycle	ENSRNOG00000062141	ENSRNOG00000061543	ENSRNOG00000020650	ENSRNOG00000016147	ENSRNOG00000000840	ENSRNOG00000026490	ENSRNOG00000017235	ENSRNOG00000007581	ENSRNOG00000001992	ENSRNOG00000030862	ENSRNOG00000051860	ENSRNOG00000016928	ENSRNOG00000013428	ENSRNOG00000006542	ENSRNOG00000004560	ENSRNOG00000011905	ENSRNOG00000008218	ENSRNOG00000005697	ENSRNOG00000029165	ENSRNOG00000011000	ENSRNOG00000006989	ENSRNOG00000013547	ENSRNOG00000004846	ENSRNOG00000052704	ENSRNOG00000019193	ENSRNOG00000011644	ENSRNOG00000056612	ENSRNOG00000019317	ENSRNOG00000019433	ENSRNOG00000014816	ENSRNOG00000001709	ENSRNOG00000001494	ENSRNOG00000049929	ENSRNOG00000007392	ENSRNOG00000031283	ENSRNOG00000006527	ENSRNOG00000018452	ENSRNOG00000019534	ENSRNOG00000006926	ENSRNOG00000008237	ENSRNOG00000033835	ENSRNOG00000008890	ENSRNOG00000026243	ENSRNOG00000031662	ENSRNOG00000015865	ENSRNOG00000013573	ENSRNOG00000006037	ENSRNOG00000004291	ENSRNOG00000017506
Glutamatergic synapse	ENSRNOG00000021468	ENSRNOG00000052795	ENSRNOG00000019207	ENSRNOG00000052296	ENSRNOG00000043210	ENSRNOG00000000368	ENSRNOG00000049768	ENSRNOG00000020650	ENSRNOG00000016147	ENSRNOG00000007581	ENSRNOG00000050206	ENSRNOG00000012562	ENSRNOG00000025040	ENSRNOG00000004890	ENSRNOG00000016196	ENSRNOG00000047914	ENSRNOG00000054902	ENSRNOG00000004810	ENSRNOG00000019465	ENSRNOG00000050469	ENSRNOG00000039562	ENSRNOG00000021150	ENSRNOG00000047799	ENSRNOG00000014290	ENSRNOG00000058337	ENSRNOG00000026764	ENSRNOG00000011644	ENSRNOG00000013147	ENSRNOG00000016701	ENSRNOG00000014816	ENSRNOG00000037231	ENSRNOG00000001575	ENSRNOG00000057096	ENSRNOG00000009745	ENSRNOG00000030910	ENSRNOG00000001849	ENSRNOG00000025889	ENSRNOG00000020401	ENSRNOG00000005369	ENSRNOG00000003280	ENSRNOG00000014776	ENSRNOG00000038205	ENSRNOG00000048980	ENSRNOG00000031612	ENSRNOG00000042732	ENSRNOG00000008766	ENSRNOG00000003491	ENSRNOG00000019482	ENSRNOG00000021063
Axon guidance	ENSRNOG00000013679	ENSRNOG00000029598	ENSRNOG00000006877	ENSRNOG00000047356	ENSRNOG00000046333	ENSRNOG00000016254	ENSRNOG00000029798	ENSRNOG00000043210	ENSRNOG00000000596	ENSRNOG00000019883	ENSRNOG00000012531	ENSRNOG00000008996	ENSRNOG00000001068	ENSRNOG00000019737	ENSRNOG00000012874	ENSRNOG00000007687	ENSRNOG00000010744	ENSRNOG00000011683	ENSRNOG00000031136	ENSRNOG00000006324	ENSRNOG00000014917	ENSRNOG00000054165	ENSRNOG00000007970	ENSRNOG00000009783	ENSRNOG00000020660	ENSRNOG00000024501	ENSRNOG00000011977	ENSRNOG00000033099	ENSRNOG00000002024	ENSRNOG00000048172	ENSRNOG00000009338	ENSRNOG00000017525	ENSRNOG00000003947	ENSRNOG00000016846	ENSRNOG00000025167	ENSRNOG00000003840	ENSRNOG00000010320	ENSRNOG00000054902	ENSRNOG00000012175	ENSRNOG00000015618	ENSRNOG00000060464	ENSRNOG00000008168	ENSRNOG00000007133	ENSRNOG00000016203	ENSRNOG00000052745	ENSRNOG00000001470	ENSRNOG00000018952	ENSRNOG00000007350	ENSRNOG00000011589
Steroid biosynthesis	ENSRNOG00000054549	ENSRNOG00000007234	ENSRNOG00000002826	ENSRNOG00000013062	ENSRNOG00000004903	ENSRNOG00000004111	ENSRNOG00000057814	ENSRNOG00000010406	ENSRNOG00000011367	ENSRNOG00000006787	ENSRNOG00000057173	ENSRNOG00000008305	ENSRNOG00000032297	ENSRNOG00000019077	ENSRNOG00000020776	ENSRNOG00000053769	ENSRNOG00000052574	ENSRNOG00000009550	ENSRNOG00000021314	ENSRNOG00000046214	ENSRNOG00000020989	ENSRNOG00000019409
Pantothenate and CoA biosynthesis	ENSRNOG00000017105	ENSRNOG00000053404	ENSRNOG00000020956	ENSRNOG00000019918	ENSRNOG00000016219	ENSRNOG00000018711	ENSRNOG00000039865	ENSRNOG00000038258	ENSRNOG00000053699	ENSRNOG00000015514	ENSRNOG00000005795	ENSRNOG00000014044	ENSRNOG00000013791	ENSRNOG00000004298	ENSRNOG00000007419	ENSRNOG00000018944	ENSRNOG00000008572	ENSRNOG00000025286	ENSRNOG00000013994
Fluid shear stress and atherosclerosis	ENSRNOG00000028746	ENSRNOG00000012801	ENSRNOG00000049964	ENSRNOG00000002079	ENSRNOG00000000513	ENSRNOG00000000515	ENSRNOG00000001480	ENSRNOG00000008837	ENSRNOG00000002791	ENSRNOG00000000837	ENSRNOG00000001068	ENSRNOG00000033134	ENSRNOG00000002723	ENSRNOG00000005334	ENSRNOG00000020027	ENSRNOG00000004060	ENSRNOG00000013014	ENSRNOG00000013484	ENSRNOG00000033402	ENSRNOG00000047907	ENSRNOG00000030888	ENSRNOG00000005798	ENSRNOG00000014477	ENSRNOG00000021497	ENSRNOG00000001312	ENSRNOG00000024755	ENSRNOG00000019017	ENSRNOG00000048172	ENSRNOG00000016770	ENSRNOG00000016846	ENSRNOG00000019058	ENSRNOG00000060939	ENSRNOG00000003834	ENSRNOG00000006984	ENSRNOG00000004437	ENSRNOG00000004575	ENSRNOG00000052469	ENSRNOG00000007350	ENSRNOG00000013324	ENSRNOG00000009495	ENSRNOG00000057713	ENSRNOG00000018677	ENSRNOG00000005033	ENSRNOG00000007706	ENSRNOG00000019598	ENSRNOG00000038300	ENSRNOG00000007468	ENSRNOG00000022071	ENSRNOG00000019834
Proteoglycans in cancer	ENSRNOG00000052795	ENSRNOG00000000513	ENSRNOG00000000515	ENSRNOG00000002978	ENSRNOG00000019358	ENSRNOG00000000837	ENSRNOG00000001068	ENSRNOG00000010103	ENSRNOG00000047280	ENSRNOG00000004500	ENSRNOG00000030118	ENSRNOG00000012002	ENSRNOG00000061031	ENSRNOG00000009783	ENSRNOG00000005798	ENSRNOG00000021497	ENSRNOG00000005642	ENSRNOG00000017409	ENSRNOG00000051905	ENSRNOG00000003919	ENSRNOG00000009338	ENSRNOG00000004610	ENSRNOG00000016846	ENSRNOG00000019742	ENSRNOG00000015618	ENSRNOG00000008168	ENSRNOG00000014385	ENSRNOG00000018708	ENSRNOG00000004660	ENSRNOG00000052745	ENSRNOG00000006984	ENSRNOG00000061238	ENSRNOG00000016119	ENSRNOG00000003807	ENSRNOG00000011589	ENSRNOG00000023079	ENSRNOG00000004303	ENSRNOG00000009495	ENSRNOG00000057713	ENSRNOG00000061818	ENSRNOG00000015982	ENSRNOG00000018677	ENSRNOG00000010031	ENSRNOG00000054945	ENSRNOG00000018646	ENSRNOG00000019142	ENSRNOG00000018241	ENSRNOG00000019598	ENSRNOG00000013536
Parathyroid hormone synthesis, secretion and action	ENSRNOG00000017801	ENSRNOG00000052795	ENSRNOG00000000464	ENSRNOG00000049768	ENSRNOG00000023643	ENSRNOG00000002791	ENSRNOG00000019607	ENSRNOG00000033134	ENSRNOG00000001235	ENSRNOG00000000431	ENSRNOG00000020828	ENSRNOG00000047028	ENSRNOG00000005413	ENSRNOG00000008622	ENSRNOG00000004890	ENSRNOG00000023493	ENSRNOG00000019422	ENSRNOG00000003232	ENSRNOG00000016037	ENSRNOG00000012622	ENSRNOG00000013062	ENSRNOG00000042536	ENSRNOG00000004810	ENSRNOG00000019465	ENSRNOG00000010947	ENSRNOG00000018646	ENSRNOG00000021150	ENSRNOG00000002265	ENSRNOG00000058337	ENSRNOG00000052205	ENSRNOG00000020130	ENSRNOG00000019568	ENSRNOG00000012826	ENSRNOG00000042954	ENSRNOG00000010957	ENSRNOG00000057096	ENSRNOG00000020193	ENSRNOG00000001849	ENSRNOG00000025889	ENSRNOG00000050519	ENSRNOG00000015394	ENSRNOG00000020401	ENSRNOG00000005600	ENSRNOG00000002632	ENSRNOG00000010451	ENSRNOG00000015008	ENSRNOG00000014776	ENSRNOG00000016050	ENSRNOG00000005708
Lysosome	ENSRNOG00000019629	ENSRNOG00000000304	ENSRNOG00000012016	ENSRNOG00000014956	ENSRNOG00000032942	ENSRNOG00000012729	ENSRNOG00000017235	ENSRNOG00000028688	ENSRNOG00000062279	ENSRNOG00000000435	ENSRNOG00000012062	ENSRNOG00000031814	ENSRNOG00000007089	ENSRNOG00000009330	ENSRNOG00000030862	ENSRNOG00000000108	ENSRNOG00000008786	ENSRNOG00000010331	ENSRNOG00000015551	ENSRNOG00000046261	ENSRNOG00000013428	ENSRNOG00000006542	ENSRNOG00000021155	ENSRNOG00000000975	ENSRNOG00000000043	ENSRNOG00000020647	ENSRNOG00000055439	ENSRNOG00000037563	ENSRNOG00000011150	ENSRNOG00000032381	ENSRNOG00000018977	ENSRNOG00000052704	ENSRNOG00000054352	ENSRNOG00000011461	ENSRNOG00000019550	ENSRNOG00000003759	ENSRNOG00000002225	ENSRNOG00000012953	ENSRNOG00000049991	ENSRNOG00000059911	ENSRNOG00000049929	ENSRNOG00000002520	ENSRNOG00000007212	ENSRNOG00000010624	ENSRNOG00000006926	ENSRNOG00000005765	ENSRNOG00000000164	ENSRNOG00000007650	ENSRNOG00000014454
Melanogenesis	ENSRNOG00000049768	ENSRNOG00000002227	ENSRNOG00000004060	ENSRNOG00000061031	ENSRNOG00000014753	ENSRNOG00000009783	ENSRNOG00000008658	ENSRNOG00000005413	ENSRNOG00000004890	ENSRNOG00000023493	ENSRNOG00000017409	ENSRNOG00000051905	ENSRNOG00000009338	ENSRNOG00000016770	ENSRNOG00000015618	ENSRNOG00000008168	ENSRNOG00000014385	ENSRNOG00000019423	ENSRNOG00000004660	ENSRNOG00000061238	ENSRNOG00000016119	ENSRNOG00000003807	ENSRNOG00000004810	ENSRNOG00000011589	ENSRNOG00000023079	ENSRNOG00000010997	ENSRNOG00000019465	ENSRNOG00000061818	ENSRNOG00000015982	ENSRNOG00000021150	ENSRNOG00000017915	ENSRNOG00000058337	ENSRNOG00000013993	ENSRNOG00000002833	ENSRNOG00000012826	ENSRNOG00000047211	ENSRNOG00000000190	ENSRNOG00000057096	ENSRNOG00000001849	ENSRNOG00000025889	ENSRNOG00000017701	ENSRNOG00000020401	ENSRNOG00000052080	ENSRNOG00000014776	ENSRNOG00000005781	ENSRNOG00000005872	ENSRNOG00000031955	ENSRNOG00000049232	ENSRNOG00000016848
Renin secretion	ENSRNOG00000052795	ENSRNOG00000043210	ENSRNOG00000029876	ENSRNOG00000007467	ENSRNOG00000062101	ENSRNOG00000012674	ENSRNOG00000002937	ENSRNOG00000004720	ENSRNOG00000004060	ENSRNOG00000003442	ENSRNOG00000013771	ENSRNOG00000010331	ENSRNOG00000016770	ENSRNOG00000012721	ENSRNOG00000013240	ENSRNOG00000011648	ENSRNOG00000004810	ENSRNOG00000007477	ENSRNOG00000019465	ENSRNOG00000012060	ENSRNOG00000021150	ENSRNOG00000058337	ENSRNOG00000025042	ENSRNOG00000013147	ENSRNOG00000009390	ENSRNOG00000054212	ENSRNOG00000012098	ENSRNOG00000057096	ENSRNOG00000009745	ENSRNOG00000025889	ENSRNOG00000018346	ENSRNOG00000036877	ENSRNOG00000018445	ENSRNOG00000031955	ENSRNOG00000029889	ENSRNOG00000011417	ENSRNOG00000005985	ENSRNOG00000008176	ENSRNOG00000016592	ENSRNOG00000010348	ENSRNOG00000009440	ENSRNOG00000007090	ENSRNOG00000050968	ENSRNOG00000014684	ENSRNOG00000038202	ENSRNOG00000005368	ENSRNOG00000054782	ENSRNOG00000019217	ENSRNOG00000053339
Mineral absorption	ENSRNOG00000002934	ENSRNOG00000012294	ENSRNOG00000023094	ENSRNOG00000029979	ENSRNOG00000014475	ENSRNOG00000017775	ENSRNOG00000043098	ENSRNOG00000026501	ENSRNOG00000029082	ENSRNOG00000029514	ENSRNOG00000048318	ENSRNOG00000003031	ENSRNOG00000038047	ENSRNOG00000001742	ENSRNOG00000019550	ENSRNOG00000048574	ENSRNOG00000061304	ENSRNOG00000010291	ENSRNOG00000015159	ENSRNOG00000049995	ENSRNOG00000030269	ENSRNOG00000001492	ENSRNOG00000006076	ENSRNOG00000003872	ENSRNOG00000025764	ENSRNOG00000010451	ENSRNOG00000030019	ENSRNOG00000008479	ENSRNOG00000003783	ENSRNOG00000004626	ENSRNOG00000020263	ENSRNOG00000016469	ENSRNOG00000006878	ENSRNOG00000034150	ENSRNOG00000020450	ENSRNOG00000007290	ENSRNOG00000004026	ENSRNOG00000015262	ENSRNOG00000029871	ENSRNOG00000022941	ENSRNOG00000022619	ENSRNOG00000020843	ENSRNOG00000004222	ENSRNOG00000004662	ENSRNOG00000000017	ENSRNOG00000032378	ENSRNOG00000022407	ENSRNOG00000011227	ENSRNOG00000013118
Vibrio cholerae infection	ENSRNOG00000049768	ENSRNOG00000000840	ENSRNOG00000017235	ENSRNOG00000023278	ENSRNOG00000001992	ENSRNOG00000020532	ENSRNOG00000013577	ENSRNOG00000030862	ENSRNOG00000049451	ENSRNOG00000051860	ENSRNOG00000013428	ENSRNOG00000006542	ENSRNOG00000049016	ENSRNOG00000011905	ENSRNOG00000006462	ENSRNOG00000008218	ENSRNOG00000004846	ENSRNOG00000052704	ENSRNOG00000055103	ENSRNOG00000054352	ENSRNOG00000014455	ENSRNOG00000060229	ENSRNOG00000061620	ENSRNOG00000051986	ENSRNOG00000053452	ENSRNOG00000049929	ENSRNOG00000007392	ENSRNOG00000006926	ENSRNOG00000025889	ENSRNOG00000051490	ENSRNOG00000003491	ENSRNOG00000013573	ENSRNOG00000005203	ENSRNOG00000013743	ENSRNOG00000001083	ENSRNOG00000011077	ENSRNOG00000036701	ENSRNOG00000003999	ENSRNOG00000047374	ENSRNOG00000009080	ENSRNOG00000008163	ENSRNOG00000011891	ENSRNOG00000036814	ENSRNOG00000019655	ENSRNOG00000005257	ENSRNOG00000015971	ENSRNOG00000006228	ENSRNOG00000058024	ENSRNOG00000021082
ECM-receptor interaction	ENSRNOG00000002548	ENSRNOG00000043451	ENSRNOG00000004861	ENSRNOG00000048472	ENSRNOG00000011300	ENSRNOG00000002667	ENSRNOG00000002680	ENSRNOG00000005906	ENSRNOG00000043176	ENSRNOG00000040108	ENSRNOG00000014851	ENSRNOG00000002468	ENSRNOG00000038540	ENSRNOG00000046981	ENSRNOG00000005580	ENSRNOG00000012208	ENSRNOG00000018951	ENSRNOG00000025959	ENSRNOG00000022309	ENSRNOG00000021182	ENSRNOG00000010031	ENSRNOG00000054945	ENSRNOG00000020205	ENSRNOG00000016538	ENSRNOG00000031782	ENSRNOG00000018094	ENSRNOG00000007905	ENSRNOG00000012471	ENSRNOG00000022071	ENSRNOG00000053691	ENSRNOG00000061705	ENSRNOG00000010529	ENSRNOG00000006569	ENSRNOG00000021441	ENSRNOG00000002053	ENSRNOG00000002158	ENSRNOG00000003304	ENSRNOG00000059507	ENSRNOG00000059947	ENSRNOG00000058645	ENSRNOG00000010966	ENSRNOG00000015365	ENSRNOG00000011134	ENSRNOG00000004276	ENSRNOG00000019400	ENSRNOG00000000599	ENSRNOG00000049667	ENSRNOG00000008346	ENSRNOG00000011292
Galactose metabolism	ENSRNOG00000009513	ENSRNOG00000002185	ENSRNOG00000051171	ENSRNOG00000027433	ENSRNOG00000061527	ENSRNOG00000009734	ENSRNOG00000003681	ENSRNOG00000010811	ENSRNOG00000009889	ENSRNOG00000014766	ENSRNOG00000006116	ENSRNOG00000046891	ENSRNOG00000007023	ENSRNOG00000026177	ENSRNOG00000050620	ENSRNOG00000059461	ENSRNOG00000001214	ENSRNOG00000009875	ENSRNOG00000047656	ENSRNOG00000020902	ENSRNOG00000006359	ENSRNOG00000008079	ENSRNOG00000031067	ENSRNOG00000010196	ENSRNOG00000011513	ENSRNOG00000009712	ENSRNOG00000057988	ENSRNOG00000019609	ENSRNOG00000017163	ENSRNOG00000049045	ENSRNOG00000024563	ENSRNOG00000026235
Hypertrophic cardiomyopathy (HCM)	ENSRNOG00000004861	ENSRNOG00000007467	ENSRNOG00000062101	ENSRNOG00000000837	ENSRNOG00000019638	ENSRNOG00000046366	ENSRNOG00000004518	ENSRNOG00000033531	ENSRNOG00000018943	ENSRNOG00000005580	ENSRNOG00000018184	ENSRNOG00000010278	ENSRNOG00000012208	ENSRNOG00000001142	ENSRNOG00000057852	ENSRNOG00000016538	ENSRNOG00000007706	ENSRNOG00000003262	ENSRNOG00000018378	ENSRNOG00000007905	ENSRNOG00000058882	ENSRNOG00000018250	ENSRNOG00000022071	ENSRNOG00000003245	ENSRNOG00000013147	ENSRNOG00000053452	ENSRNOG00000006569	ENSRNOG00000056257	ENSRNOG00000001492	ENSRNOG00000002135	ENSRNOG00000010966	ENSRNOG00000015835	ENSRNOG00000022637	ENSRNOG00000011134	ENSRNOG00000004276	ENSRNOG00000020652	ENSRNOG00000012362	ENSRNOG00000019400	ENSRNOG00000008479	ENSRNOG00000018445	ENSRNOG00000008031	ENSRNOG00000049667	ENSRNOG00000008346	ENSRNOG00000020955	ENSRNOG00000010348	ENSRNOG00000007090	ENSRNOG00000030848	ENSRNOG00000006723	ENSRNOG00000008536
Cushing syndrome	ENSRNOG00000017801	ENSRNOG00000052795	ENSRNOG00000013313	ENSRNOG00000007607	ENSRNOG00000049768	ENSRNOG00000029273	ENSRNOG00000030111	ENSRNOG00000000428	ENSRNOG00000000431	ENSRNOG00000061031	ENSRNOG00000014753	ENSRNOG00000009783	ENSRNOG00000005413	ENSRNOG00000008622	ENSRNOG00000004890	ENSRNOG00000023493	ENSRNOG00000017409	ENSRNOG00000051905	ENSRNOG00000015133	ENSRNOG00000007048	ENSRNOG00000033791	ENSRNOG00000015618	ENSRNOG00000042884	ENSRNOG00000004918	ENSRNOG00000008168	ENSRNOG00000014385	ENSRNOG00000019423	ENSRNOG00000021289	ENSRNOG00000004660	ENSRNOG00000016029	ENSRNOG00000061238	ENSRNOG00000016119	ENSRNOG00000003807	ENSRNOG00000004810	ENSRNOG00000019005	ENSRNOG00000011589	ENSRNOG00000015052	ENSRNOG00000019465	ENSRNOG00000061818	ENSRNOG00000015982	ENSRNOG00000047741	ENSRNOG00000033893	ENSRNOG00000021150	ENSRNOG00000009790	ENSRNOG00000017915	ENSRNOG00000058337	ENSRNOG00000013993	ENSRNOG00000013147	ENSRNOG00000002833
Ether lipid metabolism	ENSRNOG00000002755	ENSRNOG00000059295	ENSRNOG00000028566	ENSRNOG00000057470	ENSRNOG00000055849	ENSRNOG00000008116	ENSRNOG00000042041	ENSRNOG00000017930	ENSRNOG00000026764	ENSRNOG00000016643	ENSRNOG00000058271	ENSRNOG00000020481	ENSRNOG00000037231	ENSRNOG00000016798	ENSRNOG00000021206	ENSRNOG00000012295	ENSRNOG00000019685	ENSRNOG00000003164	ENSRNOG00000057102	ENSRNOG00000016826	ENSRNOG00000001153	ENSRNOG00000000177	ENSRNOG00000004089	ENSRNOG00000017723	ENSRNOG00000024904	ENSRNOG00000060561	ENSRNOG00000025691	ENSRNOG00000002657	ENSRNOG00000008135	ENSRNOG00000028156	ENSRNOG00000009345	ENSRNOG00000025121	ENSRNOG00000018390	ENSRNOG00000001547	ENSRNOG00000026037	ENSRNOG00000009980	ENSRNOG00000016838	ENSRNOG00000005058	ENSRNOG00000046619	ENSRNOG00000038607	ENSRNOG00000016945	ENSRNOG00000022288	ENSRNOG00000016647	ENSRNOG00000007447	ENSRNOG00000009660	ENSRNOG00000019604
PPAR signaling pathway	ENSRNOG00000000464	ENSRNOG00000005906	ENSRNOG00000043176	ENSRNOG00000040108	ENSRNOG00000015086	ENSRNOG00000045947	ENSRNOG00000049075	ENSRNOG00000012966	ENSRNOG00000016488	ENSRNOG00000012443	ENSRNOG00000000503	ENSRNOG00000057823	ENSRNOG00000010128	ENSRNOG00000018436	ENSRNOG00000012181	ENSRNOG00000003902	ENSRNOG00000046239	ENSRNOG00000056219	ENSRNOG00000016552	ENSRNOG00000009597	ENSRNOG00000032554	ENSRNOG00000008755	ENSRNOG00000017311	ENSRNOG00000000814	ENSRNOG00000028616	ENSRNOG00000010633	ENSRNOG00000045679	ENSRNOG00000001770	ENSRNOG00000007060	ENSRNOG00000007545	ENSRNOG00000011082	ENSRNOG00000019626	ENSRNOG00000009686	ENSRNOG00000032353	ENSRNOG00000006136	ENSRNOG00000029397	ENSRNOG00000008842	ENSRNOG00000047549	ENSRNOG00000007771	ENSRNOG00000006675	ENSRNOG00000047503	ENSRNOG00000029096	ENSRNOG00000013552	ENSRNOG00000018536	ENSRNOG00000003500	ENSRNOG00000015658	ENSRNOG00000008881	ENSRNOG00000034116	ENSRNOG00000014369
Hedgehog signaling pathway	ENSRNOG00000005310	ENSRNOG00000002791	ENSRNOG00000015633	ENSRNOG00000000999	ENSRNOG00000018268	ENSRNOG00000017106	ENSRNOG00000025120	ENSRNOG00000007515	ENSRNOG00000026857	ENSRNOG00000018059	ENSRNOG00000036676	ENSRNOG00000018529	ENSRNOG00000004395	ENSRNOG00000003234	ENSRNOG00000002833	ENSRNOG00000013076	ENSRNOG00000061899	ENSRNOG00000057710	ENSRNOG00000016280	ENSRNOG00000008332	ENSRNOG00000004686	ENSRNOG00000059456	ENSRNOG00000019308	ENSRNOG00000014623	ENSRNOG00000014395	ENSRNOG00000007025	ENSRNOG00000005070	ENSRNOG00000020918	ENSRNOG00000005257	ENSRNOG00000019354	ENSRNOG00000052687	ENSRNOG00000050485	ENSRNOG00000030404	ENSRNOG00000057616	ENSRNOG00000011789	ENSRNOG00000016620	ENSRNOG00000053675	ENSRNOG00000002041	ENSRNOG00000056184	ENSRNOG00000006120	ENSRNOG00000007261	ENSRNOG00000004978	ENSRNOG00000019807	ENSRNOG00000018985	ENSRNOG00000007564	ENSRNOG00000016677	ENSRNOG00000003073
Other types of O-glycan biosynthesis	ENSRNOG00000008117	ENSRNOG00000024435	ENSRNOG00000040301	ENSRNOG00000003359	ENSRNOG00000001823	ENSRNOG00000001250	ENSRNOG00000024533	ENSRNOG00000001417	ENSRNOG00000005234	ENSRNOG00000008099	ENSRNOG00000003014	ENSRNOG00000033059	ENSRNOG00000046515	ENSRNOG00000001729	ENSRNOG00000019143	ENSRNOG00000061346	ENSRNOG00000028207	ENSRNOG00000012146	ENSRNOG00000050298	ENSRNOG00000037476	ENSRNOG00000004589	ENSRNOG00000007804	ENSRNOG00000059461	ENSRNOG00000010104	ENSRNOG00000004645	ENSRNOG00000012037	ENSRNOG00000005727	ENSRNOG00000023317	ENSRNOG00000005621	ENSRNOG00000002488	ENSRNOG00000016207	ENSRNOG00000047809	ENSRNOG00000008133	ENSRNOG00000019843	ENSRNOG00000007951	ENSRNOG00000019609	ENSRNOG00000038976	ENSRNOG00000017021	ENSRNOG00000002536	ENSRNOG00000019718	ENSRNOG00000003551	ENSRNOG00000010477	ENSRNOG00000005335	ENSRNOG00000001228
Circadian rhythm	ENSRNOG00000005310	ENSRNOG00000018413	ENSRNOG00000059334	ENSRNOG00000013408	ENSRNOG00000007152	ENSRNOG00000014448	ENSRNOG00000006622	ENSRNOG00000027145	ENSRNOG00000001142	ENSRNOG00000007706	ENSRNOG00000002175	ENSRNOG00000036676	ENSRNOG00000004395	ENSRNOG00000013076	ENSRNOG00000048961	ENSRNOG00000013413	ENSRNOG00000016280	ENSRNOG00000020836	ENSRNOG00000007387	ENSRNOG00000058914	ENSRNOG00000005828	ENSRNOG00000049584	ENSRNOG00000007478	ENSRNOG00000009329	ENSRNOG00000013412	ENSRNOG00000017248	ENSRNOG00000009085	ENSRNOG00000018166	ENSRNOG00000012799	ENSRNOG00000020254
Ovarian Steroidogenesis	ENSRNOG00000040287	ENSRNOG00000029986	ENSRNOG00000049768	ENSRNOG00000032508	ENSRNOG00000030466	ENSRNOG00000002525	ENSRNOG00000038361	ENSRNOG00000002826	ENSRNOG00000004890	ENSRNOG00000000196	ENSRNOG00000042884	ENSRNOG00000021735	ENSRNOG00000015052	ENSRNOG00000004898	ENSRNOG00000026764	ENSRNOG00000002984	ENSRNOG00000037231	ENSRNOG00000055221	ENSRNOG00000019441	ENSRNOG00000025889	ENSRNOG00000012972	ENSRNOG00000000981	ENSRNOG00000020401	ENSRNOG00000047040	ENSRNOG00000016783	ENSRNOG00000014776	ENSRNOG00000016712	ENSRNOG00000053460	ENSRNOG00000020035	ENSRNOG00000032150	ENSRNOG00000031004	ENSRNOG00000020405	ENSRNOG00000024904	ENSRNOG00000017672	ENSRNOG00000002229	ENSRNOG00000042224	ENSRNOG00000014187	ENSRNOG00000002657	ENSRNOG00000008135	ENSRNOG00000003999	ENSRNOG00000047374	ENSRNOG00000054757	ENSRNOG00000005257	ENSRNOG00000009269	ENSRNOG00000019830	ENSRNOG00000013982	ENSRNOG00000059479	ENSRNOG00000009946	ENSRNOG00000012052
Arrhythmogenic right ventricular cardiomyopathy (ARVC)	ENSRNOG00000004861	ENSRNOG00000019638	ENSRNOG00000046366	ENSRNOG00000004518	ENSRNOG00000014753	ENSRNOG00000015380	ENSRNOG00000033531	ENSRNOG00000000373	ENSRNOG00000000378	ENSRNOG00000005580	ENSRNOG00000012208	ENSRNOG00000054121	ENSRNOG00000057852	ENSRNOG00000016538	ENSRNOG00000003262	ENSRNOG00000018378	ENSRNOG00000007905	ENSRNOG00000058882	ENSRNOG00000022071	ENSRNOG00000003245	ENSRNOG00000013993	ENSRNOG00000013147	ENSRNOG00000053452	ENSRNOG00000006569	ENSRNOG00000056257	ENSRNOG00000001492	ENSRNOG00000002135	ENSRNOG00000010966	ENSRNOG00000015835	ENSRNOG00000011134	ENSRNOG00000004276	ENSRNOG00000012362	ENSRNOG00000019400	ENSRNOG00000008479	ENSRNOG00000005872	ENSRNOG00000049232	ENSRNOG00000008031	ENSRNOG00000049667	ENSRNOG00000008346	ENSRNOG00000010348	ENSRNOG00000039969	ENSRNOG00000013928	ENSRNOG00000007090	ENSRNOG00000006723	ENSRNOG00000005796	ENSRNOG00000002372	ENSRNOG00000029871	ENSRNOG00000017833	ENSRNOG00000001285
Hippo signaling pathway	ENSRNOG00000007810	ENSRNOG00000002767	ENSRNOG00000004500	ENSRNOG00000002889	ENSRNOG00000061031	ENSRNOG00000014753	ENSRNOG00000000373	ENSRNOG00000000378	ENSRNOG00000017409	ENSRNOG00000051905	ENSRNOG00000005389	ENSRNOG00000010996	ENSRNOG00000000506	ENSRNOG00000007237	ENSRNOG00000025498	ENSRNOG00000033791	ENSRNOG00000015618	ENSRNOG00000008168	ENSRNOG00000014385	ENSRNOG00000018708	ENSRNOG00000019423	ENSRNOG00000004660	ENSRNOG00000015488	ENSRNOG00000061238	ENSRNOG00000016119	ENSRNOG00000003807	ENSRNOG00000052469	ENSRNOG00000011278	ENSRNOG00000054121	ENSRNOG00000061818	ENSRNOG00000015982	ENSRNOG00000010945	ENSRNOG00000032574	ENSRNOG00000014293	ENSRNOG00000056343	ENSRNOG00000017915	ENSRNOG00000020695	ENSRNOG00000007036	ENSRNOG00000002866	ENSRNOG00000013993	ENSRNOG00000018851	ENSRNOG00000036676	ENSRNOG00000004395	ENSRNOG00000011158	ENSRNOG00000032437	ENSRNOG00000002754	ENSRNOG00000002833	ENSRNOG00000019377	ENSRNOG00000053452
Mucin type O-glycan biosynthesis	ENSRNOG00000008117	ENSRNOG00000024435	ENSRNOG00000040301	ENSRNOG00000008209	ENSRNOG00000059540	ENSRNOG00000008099	ENSRNOG00000033059	ENSRNOG00000055451	ENSRNOG00000008283	ENSRNOG00000019143	ENSRNOG00000037476	ENSRNOG00000004589	ENSRNOG00000007804	ENSRNOG00000004645	ENSRNOG00000012037	ENSRNOG00000050534	ENSRNOG00000005727	ENSRNOG00000002488	ENSRNOG00000016207	ENSRNOG00000047809	ENSRNOG00000017932	ENSRNOG00000014471	ENSRNOG00000007951	ENSRNOG00000000251	ENSRNOG00000038976	ENSRNOG00000017021	ENSRNOG00000002536	ENSRNOG00000019718	ENSRNOG00000005335
Collecting duct acid secretion	ENSRNOG00000000840	ENSRNOG00000017235	ENSRNOG00000001992	ENSRNOG00000051860	ENSRNOG00000013428	ENSRNOG00000006542	ENSRNOG00000011905	ENSRNOG00000008218	ENSRNOG00000004846	ENSRNOG00000052704	ENSRNOG00000049929	ENSRNOG00000007392	ENSRNOG00000006926	ENSRNOG00000013573	ENSRNOG00000020985	ENSRNOG00000009080	ENSRNOG00000008163	ENSRNOG00000011891	ENSRNOG00000036814	ENSRNOG00000009629	ENSRNOG00000009897	ENSRNOG00000058024	ENSRNOG00000050553	ENSRNOG00000020951	ENSRNOG00000003269	ENSRNOG00000016372	ENSRNOG00000015566	ENSRNOG00000018543	ENSRNOG00000017220	ENSRNOG00000022480
Glycosaminoglycan biosynthesis - chondroitin sulfate / dermatan sulfate	ENSRNOG00000010466	ENSRNOG00000013024	ENSRNOG00000047935	ENSRNOG00000016267	ENSRNOG00000014713	ENSRNOG00000004258	ENSRNOG00000016381	ENSRNOG00000008885	ENSRNOG00000025930	ENSRNOG00000012698	ENSRNOG00000056658	ENSRNOG00000019979	ENSRNOG00000050152	ENSRNOG00000000572	ENSRNOG00000000824	ENSRNOG00000001252	ENSRNOG00000021886	ENSRNOG00000003728	ENSRNOG00000045997	ENSRNOG00000020038	ENSRNOG00000019804
Steroid hormone biosynthesis	ENSRNOG00000040287	ENSRNOG00000001980	ENSRNOG00000046540	ENSRNOG00000001990	ENSRNOG00000000969	ENSRNOG00000017084	ENSRNOG00000030111	ENSRNOG00000000428	ENSRNOG00000024016	ENSRNOG00000000466	ENSRNOG00000049464	ENSRNOG00000038361	ENSRNOG00000015695	ENSRNOG00000001960	ENSRNOG00000002826	ENSRNOG00000031529	ENSRNOG00000046643	ENSRNOG00000013004	ENSRNOG00000029179	ENSRNOG00000002597	ENSRNOG00000000196	ENSRNOG00000042884	ENSRNOG00000001466	ENSRNOG00000021735	ENSRNOG00000013291	ENSRNOG00000032261	ENSRNOG00000033680	ENSRNOG00000027042	ENSRNOG00000009630	ENSRNOG00000032560	ENSRNOG00000020775	ENSRNOG00000012458	ENSRNOG00000052810	ENSRNOG00000046080	ENSRNOG00000021405	ENSRNOG00000019441	ENSRNOG00000016173	ENSRNOG00000021046	ENSRNOG00000009730	ENSRNOG00000020801	ENSRNOG00000001973	ENSRNOG00000020035	ENSRNOG00000021924	ENSRNOG00000042714	ENSRNOG00000001379	ENSRNOG00000007758	ENSRNOG00000027891	ENSRNOG00000008988	ENSRNOG00000017672
Prion diseases	ENSRNOG00000000596	ENSRNOG00000018899	ENSRNOG00000010906	ENSRNOG00000002680	ENSRNOG00000007697	ENSRNOG00000061379	ENSRNOG00000019422	ENSRNOG00000002126	ENSRNOG00000010278	ENSRNOG00000004575	ENSRNOG00000021164	ENSRNOG00000013736	ENSRNOG00000020876	ENSRNOG00000001849	ENSRNOG00000012807	ENSRNOG00000028701	ENSRNOG00000010171	ENSRNOG00000021259	ENSRNOG00000012804	ENSRNOG00000020005	ENSRNOG00000031890	ENSRNOG00000018294	ENSRNOG00000002115	ENSRNOG00000007639	ENSRNOG00000024115	ENSRNOG00000033434	ENSRNOG00000005257	ENSRNOG00000004649	ENSRNOG00000012749	ENSRNOG00000010176	ENSRNOG00000053583	ENSRNOG00000004978	ENSRNOG00000019322
Mannose type O-glycan biosyntheis	ENSRNOG00000019492	ENSRNOG00000012146	ENSRNOG00000028129	ENSRNOG00000046852	ENSRNOG00000046904	ENSRNOG00000059461	ENSRNOG00000008475	ENSRNOG00000016855	ENSRNOG00000004421	ENSRNOG00000024954	ENSRNOG00000023455	ENSRNOG00000012815	ENSRNOG00000019843	ENSRNOG00000006353	ENSRNOG00000009157	ENSRNOG00000007142	ENSRNOG00000019609	ENSRNOG00000016055	ENSRNOG00000013742	ENSRNOG00000003551	ENSRNOG00000006199	ENSRNOG00000020110	ENSRNOG00000010477	ENSRNOG00000014628
Basal cell carcinoma	ENSRNOG00000000485	ENSRNOG00000061031	ENSRNOG00000018268	ENSRNOG00000014753	ENSRNOG00000017409	ENSRNOG00000051905	ENSRNOG00000025120	ENSRNOG00000033791	ENSRNOG00000015618	ENSRNOG00000008168	ENSRNOG00000014385	ENSRNOG00000019423	ENSRNOG00000004660	ENSRNOG00000061238	ENSRNOG00000016119	ENSRNOG00000003807	ENSRNOG00000026857	ENSRNOG00000061818	ENSRNOG00000015982	ENSRNOG00000017915	ENSRNOG00000013993	ENSRNOG00000013090	ENSRNOG00000002833	ENSRNOG00000047211	ENSRNOG00000020876	ENSRNOG00000021276	ENSRNOG00000009694	ENSRNOG00000005781	ENSRNOG00000014071	ENSRNOG00000005872	ENSRNOG00000049232	ENSRNOG00000008332	ENSRNOG00000016848	ENSRNOG00000060626	ENSRNOG00000021962	ENSRNOG00000014395	ENSRNOG00000019822	ENSRNOG00000003066	ENSRNOG00000003845	ENSRNOG00000059244	ENSRNOG00000014678	ENSRNOG00000046657	ENSRNOG00000048782	ENSRNOG00000019354	ENSRNOG00000030665	ENSRNOG00000005615	ENSRNOG00000016242	ENSRNOG00000003039	ENSRNOG00000057616
Signaling pathways regulating pluripotency of stem cells	ENSRNOG00000000513	ENSRNOG00000000515	ENSRNOG00000000861	ENSRNOG00000006934	ENSRNOG00000005334	ENSRNOG00000004500	ENSRNOG00000046487	ENSRNOG00000014320	ENSRNOG00000061031	ENSRNOG00000026124	ENSRNOG00000007002	ENSRNOG00000016299	ENSRNOG00000014477	ENSRNOG00000021497	ENSRNOG00000017409	ENSRNOG00000051905	ENSRNOG00000004606	ENSRNOG00000009338	ENSRNOG00000016846	ENSRNOG00000019742	ENSRNOG00000007237	ENSRNOG00000033791	ENSRNOG00000015618	ENSRNOG00000008706	ENSRNOG00000008168	ENSRNOG00000009899	ENSRNOG00000014385	ENSRNOG00000019423	ENSRNOG00000004660	ENSRNOG00000006984	ENSRNOG00000061238	ENSRNOG00000016119	ENSRNOG00000003807	ENSRNOG00000052469	ENSRNOG00000059968	ENSRNOG00000023079	ENSRNOG00000061818	ENSRNOG00000011696	ENSRNOG00000015982	ENSRNOG00000002074	ENSRNOG00000001392	ENSRNOG00000018677	ENSRNOG00000005033	ENSRNOG00000008360	ENSRNOG00000000062	ENSRNOG00000058416	ENSRNOG00000033458	ENSRNOG00000016099	ENSRNOG00000017915
Glycosaminoglycan biosynthesis - heparan sulfate / heparin	ENSRNOG00000010598	ENSRNOG00000024886	ENSRNOG00000013581	ENSRNOG00000014323	ENSRNOG00000012549	ENSRNOG00000017659	ENSRNOG00000003384	ENSRNOG00000056658	ENSRNOG00000057755	ENSRNOG00000019979	ENSRNOG00000015781	ENSRNOG00000027171	ENSRNOG00000014516	ENSRNOG00000000605	ENSRNOG00000016776	ENSRNOG00000030880	ENSRNOG00000021886	ENSRNOG00000008944	ENSRNOG00000025372	ENSRNOG00000009577	ENSRNOG00000024591	ENSRNOG00000003728	ENSRNOG00000019014	ENSRNOG00000019804
Complement and coagulation cascades	ENSRNOG00000002783	ENSRNOG00000000419	ENSRNOG00000051158	ENSRNOG00000051235	ENSRNOG00000007092	ENSRNOG00000047657	ENSRNOG00000018899	ENSRNOG00000030729	ENSRNOG00000000443	ENSRNOG00000038132	ENSRNOG00000033564	ENSRNOG00000007697	ENSRNOG00000018054	ENSRNOG00000032669	ENSRNOG00000061379	ENSRNOG00000011258	ENSRNOG00000014376	ENSRNOG00000002460	ENSRNOG00000016460	ENSRNOG00000047300	ENSRNOG00000042901	ENSRNOG00000011971	ENSRNOG00000010935	ENSRNOG00000003233	ENSRNOG00000005039	ENSRNOG00000010031	ENSRNOG00000013736	ENSRNOG00000012613	ENSRNOG00000042369	ENSRNOG00000052604	ENSRNOG00000037762	ENSRNOG00000011637	ENSRNOG00000036703	ENSRNOG00000011796	ENSRNOG00000007917	ENSRNOG00000042821	ENSRNOG00000004687	ENSRNOG00000014118	ENSRNOG00000017223	ENSRNOG00000016325	ENSRNOG00000026207	ENSRNOG00000019330	ENSRNOG00000009211	ENSRNOG00000012807	ENSRNOG00000004488	ENSRNOG00000003927	ENSRNOG00000028701	ENSRNOG00000015957	ENSRNOG00000046834
Cortisol synthesis and secretion	ENSRNOG00000017801	ENSRNOG00000052795	ENSRNOG00000013313	ENSRNOG00000007607	ENSRNOG00000049768	ENSRNOG00000030111	ENSRNOG00000003765	ENSRNOG00000000428	ENSRNOG00000000431	ENSRNOG00000005413	ENSRNOG00000008622	ENSRNOG00000004890	ENSRNOG00000023493	ENSRNOG00000042884	ENSRNOG00000004918	ENSRNOG00000004810	ENSRNOG00000019005	ENSRNOG00000015052	ENSRNOG00000033893	ENSRNOG00000021150	ENSRNOG00000009790	ENSRNOG00000058337	ENSRNOG00000013147	ENSRNOG00000012826	ENSRNOG00000019441	ENSRNOG00000025889	ENSRNOG00000018346	ENSRNOG00000000981	ENSRNOG00000020401	ENSRNOG00000014776	ENSRNOG00000002653	ENSRNOG00000060528	ENSRNOG00000018445	ENSRNOG00000016452	ENSRNOG00000010280	ENSRNOG00000020035	ENSRNOG00000010348	ENSRNOG00000032150	ENSRNOG00000007090	ENSRNOG00000053339	ENSRNOG00000004693	ENSRNOG00000002229	ENSRNOG00000001804	ENSRNOG00000010640	ENSRNOG00000046231	ENSRNOG00000003999	ENSRNOG00000047374	ENSRNOG00000054757	ENSRNOG00000012682
TGF-beta signaling pathway	ENSRNOG00000007810	ENSRNOG00000005310	ENSRNOG00000006934	ENSRNOG00000000837	ENSRNOG00000005334	ENSRNOG00000012874	ENSRNOG00000004500	ENSRNOG00000000999	ENSRNOG00000014320	ENSRNOG00000026124	ENSRNOG00000049402	ENSRNOG00000014477	ENSRNOG00000033090	ENSRNOG00000005389	ENSRNOG00000013055	ENSRNOG00000003919	ENSRNOG00000007237	ENSRNOG00000001750	ENSRNOG00000052469	ENSRNOG00000006490	ENSRNOG00000005033	ENSRNOG00000015708	ENSRNOG00000023683	ENSRNOG00000058416	ENSRNOG00000016099	ENSRNOG00000007468	ENSRNOG00000007036	ENSRNOG00000022870	ENSRNOG00000004828	ENSRNOG00000019377	ENSRNOG00000042374	ENSRNOG00000048190	ENSRNOG00000042954	ENSRNOG00000027183	ENSRNOG00000014850	ENSRNOG00000021276	ENSRNOG00000000190	ENSRNOG00000010681	ENSRNOG00000001849	ENSRNOG00000050519	ENSRNOG00000009694	ENSRNOG00000011282	ENSRNOG00000020652	ENSRNOG00000003616	ENSRNOG00000008620	ENSRNOG00000021200	ENSRNOG00000030925	ENSRNOG00000016066	ENSRNOG00000018359
[truncated: 429 more columns]
