# Supplementary material for: Transcription analyses of differentially expressed mRNAs, lncRNAs, circRNAs, and miRNAs in the growth plate of rats with glucocorticoid-induced growth retardation
Source: PeerJ. 2023 Jan 16;11:e14603. doi: 10.7717/peerj.14603 (PMC9851049; doi:10.7717/peerj.14603)
Supplement: Supplemental Information 4 [file peerj-11-14603-s004.xlsx]

## Sheet: Dex_7d_vs_Control_7d. mRNA
gene_id	gene_name	gene_locus	Dex_7d_FPKM	Control_7d_FPKM	log2FoldChange	pvalue	padj
ENSRNOG00000004630	Rag1	3:91206394-91217491	0.04119	26.8092	-9.3308	3.2354e-79	9.30178e-75
ENSRNOG00000025990	Igll1	11:88388378-88391370	0	38.5936	-15.6951	9.82134e-61	1.41182e-56
ENSRNOG00000006170	Bach2	5:47466079-47807166	0.565805	17.0791	-4.88229	7.98689e-53	7.65411e-49
ENSRNOG00000020125	Cd79a	1:81763614-81767980	0.439511	77.3117	-7.43739	5.68547e-51	4.08643e-47
ENSRNOG00000011500	Pou2af1	8:55603968-55631446	0.22471	32.4633	-7.1478	3.25626e-50	1.87235e-46
ENSRNOG00000049925	Cd79al	9:16793928-16795887	0.314087	70.9133	-7.782	7.18662e-43	3.44359e-39
ENSRNOG00000013615	Dntt	1:260289589-260321320	0.095829	14.1342	-7.17129	3.85986e-42	1.5853e-38
ENSRNOG00000011917	Cd79b	10:94497448-94500591	0.276576	43.5448	-7.27129	3.29102e-39	1.0513e-35
ENSRNOG00000017485	Cd72	5:58943027-58950373	0.20377	19.8162	-6.60188	2.90555e-37	8.35344e-34
ENSRNOG00000003136	Fcrla	13:89296573-89306260	0.61267	35.9266	-5.74587	2.81432e-35	7.35561e-32
ENSRNOG00000001908	Klhl6	11:84745904-84785893	1.29351	15.3657	-3.56672	3.16794e-34	7.58986e-31
ENSRNOG00000001165	Tmprss3	20:9910522-9929705	0.109055	7.20773	-6.04714	1.78242e-32	3.94189e-29
ENSRNOG00000039357	Niban3	16:20027348-20038716	0.0199423	15.4838	-9.58157	2.87377e-30	5.9015e-27
ENSRNOG00000029662	Wdfy4	16:9194424-9430743	1.62969	13.7432	-3.03767	7.14036e-28	1.20756e-24
ENSRNOG00000004623	Rag2	3:91086187-91200134	0.394696	5.57899	-4.7409	6.70866e-27	1.01513e-23
ENSRNOG00000013967	Blnk	1:260186967-260254600	3.69804	28.5477	-2.94353	6.7376e-25	9.6853e-22
ENSRNOG00000018311	Cd19	1:197815413-197821936	0.0922133	11.1809	-6.89643	2.42659e-24	3.32212e-21
ENSRNOG00000028108	Cytl1	14:77805130-77810147	77.9511	5.77887	3.7543	6.42663e-24	8.39843e-21
ENSRNOG00000061070	Irf4	17:34886739-34905117	0.315327	7.58824	-4.57733	9.59973e-24	1.19997e-20
ENSRNOG00000007200	Ikzf3	10:86421582-86509454	0.67899	16.2102	-4.52896	1.86026e-23	2.22844e-20
ENSRNOG00000015614	Ppp1r16b	3:155160481-155262941	1.87718	14.5613	-2.95111	2.18185e-23	2.43035e-20
ENSRNOG00000019660	Spib	1:100530429-100537377	0.389838	61.2708	-7.0567	2.19788e-23	2.43035e-20
ENSRNOG00000010798	Blk	15:46555188-46593653	0.0405783	10.8672	-8.03546	2.2346e-22	2.37943e-19
ENSRNOG00000008394	Prg2	3:72385666-72389276	19.2933	138.313	-2.83184	3.57888e-22	3.54803e-19
ENSRNOG00000033087	Cdh23	20:29857637-29990111	0.557533	4.28726	-2.94694	2.85599e-21	2.73699e-18
ENSRNOG00000048670	AABR07017841.1	15:31769972-31989863	0	0.160755	-13.5325	3.36252e-21	3.11847e-18
ENSRNOG00000008707	Epx	10:75160690-75171774	5.07027	36.9074	-2.85427	9.47092e-21	8.50903e-18
ENSRNOG00000002540	Rhoh	14:43894211-43992587	1.58255	22.8465	-3.89219	1.76342e-20	1.53631e-17
ENSRNOG00000028394	Vpreb3	20:13654809-13657943	0	5.91319	-13.0057	4.84318e-18	3.86781e-15
ENSRNOG00000009329	Nr1d1	10:86683875-86690815	24.966	2.69223	3.20799	8.42558e-18	6.5469e-15
ENSRNOG00000030763	Dpp4	3:48291055-48372672	1.337	11.395	-2.824	1.07048e-17	8.099e-15
ENSRNOG00000060011	LOC103694871	AABR07024104.1:7955-10980	0	5.80387	-12.931	1.84947e-17	1.30158e-14
ENSRNOG00000057972	NEWGENE_1562258	4:114820404-114823500	0	4.90033	-12.7669	2.63987e-17	1.80705e-14
ENSRNOG00000016519	Kdm1b	17:17987972-18028808	2.66113	14.9729	-2.48623	3.11038e-17	2.07961e-14
ENSRNOG00000010941	Tifa	2:232016971-232221234	1.69098	13.4044	-3.47517	3.70485e-17	2.42079e-14
ENSRNOG00000048562	AC109542.1	1:214452127-214455039	0	5.24029	-12.7773	1.11425e-16	7.11881e-14
ENSRNOG00000027392	Ccdc187	3:3697529-3753394	0.00774	3.13771	-8.45401	1.78376e-16	1.11485e-13
ENSRNOG00000045772	LOC100911545	4:154423209-154472924	9.68931	1.22435	2.98848	2.23236e-16	1.36554e-13
ENSRNOG00000047574	Nrxn3	6:112133204-114067564	0	0.0374187	-12.7825	5.74156e-16	3.36878e-13
ENSRNOG00000021546	Sit1	5:58985829-58987760	0	6.8906	-12.5788	8.23485e-16	4.73504e-13
ENSRNOG00000008728	Unc79	6:126874193-127064626	0.108057	1.29535	-3.58274	1.55249e-15	8.75179e-13
ENSRNOG00000024729	Pax5	5:60007587-60193713	0.0463127	15.6086	-8.88376	3.02232e-15	1.63947e-12
ENSRNOG00000050287	LOC108348080	5:137458691-137463255	8.73205	0	14.0839	5.12403e-15	2.72807e-12
ENSRNOG00000017912	Atp2a3	10:59529785-59560433	5.32976	28.6707	-2.41887	5.98807e-15	3.13013e-12
ENSRNOG00000019549	Akap12	1:40816107-40906581	4.23423	20.828	-2.38541	6.14273e-15	3.15363e-12
ENSRNOG00000055858	Myb	1:16617961-16691186	3.89185	21.0397	-2.45408	6.61693e-15	3.33749e-12
ENSRNOG00000020505	Map4k1	1:87938042-87972132	2.85348	17.8909	-2.73702	6.7686e-15	3.35513e-12
ENSRNOG00000005307	Slc4a10	3:47995959-48287910	0	0.251309	-12.4441	1.23955e-14	6.04017e-12
ENSRNOG00000037908	Prg3	3:72395218-72401318	1.37107	19.7376	-3.82864	1.54282e-14	7.39269e-12
ENSRNOG00000038365	Plekha2	16:71707943-71787787	4.99829	21.3629	-2.08008	1.82085e-14	8.58188e-12
ENSRNOG00000056981	AABR07034956.1	12:1903165-1928988	0.853162	6.45142	-2.9137	2.74708e-14	1.27385e-11
XLOC_109269	XLOC_109269	5:47460048-47485510	0.0793043	2.48966	-4.87955	3.91949e-14	1.78866e-11
ENSRNOG00000027393	AC129824.1	3:3697529-3723789	0.0116773	1.20171	-6.55916	1.08436e-13	4.87113e-11
ENSRNOG00000006557	Cyfip2	10:31278746-31419235	9.79678	35.3437	-1.89268	1.63483e-13	7.23099e-11
ENSRNOG00000036647	Olr292	1:212714179-212809714	0	0.100677	-12.107	2.40097e-13	1.03027e-10
ENSRNOG00000014963	Adgrg1	19:10423501-10460674	3.89994	14.0338	-1.85781	5.51283e-13	2.2642e-10
ENSRNOG00000005947	Pde6h	4:170947750-170965144	0.0143733	3.44103	-7.12026	7.87924e-13	3.19054e-10
ENSRNOG00000006549	Fndc9	10:31278834-31419638	0.664863	3.34534	-2.25261	1.20625e-12	4.68643e-10
ENSRNOG00000002385	Prg4	13:67672878-67688477	61.7272	19.8398	1.63484	1.73031e-12	6.54558e-10
ENSRNOG00000018445	Agt	19:57321640-57333433	27.3411	6.79282	2.00966	2.37333e-12	8.86145e-10
ENSRNOG00000031168	Arhgap15	3:28627084-29236219	2.16586	7.71397	-1.82675	4.14161e-12	1.50723e-09
ENSRNOG00000002217	Plac8	14:10692764-10714524	24.573	105.517	-2.09033	4.54593e-12	1.61352e-09
ENSRNOG00000014886	Fam107b	17:78485648-78561613	3.13141	11.8848	-1.85317	6.71946e-12	2.35591e-09
ENSRNOG00000020699	Cd37	1:101230533-101236065	5.14117	33.9885	-2.71399	1.40812e-11	4.70737e-09
ENSRNOG00000010478	LOC299282	6:127941526-128080889	5.64064	0.377808	3.90586	1.85163e-11	6.04934e-09
ENSRNOG00000022868	Ell3	3:113401734-113405829	0.0462987	4.27634	-6.47322	2.04996e-11	6.55194e-09
ENSRNOG00000030431	RT1-Db2	20:4106189-4125387	0	0.832119	-12.0755	2.12229e-11	6.70505e-09
ENSRNOG00000001839	Vpreb2	11:87157887-87159042	0.0201057	16.5814	-9.04412	2.87226e-11	8.8793e-09
ENSRNOG00000015773	Il21r	1:196996581-197024166	0.960418	5.78332	-2.58588	3.01336e-11	9.21638e-09
ENSRNOG00000020945	Ms4a1	1:227427270-227441442	0.0277703	4.67928	-5.9865	3.88779e-11	1.17657e-08
ENSRNOG00000011566	Cecr2	4:153217782-153322564	6.97908	29.8559	-2.06013	5.6543e-11	1.69334e-08
ENSRNOG00000021724	Ptprcap	1:219403970-219406128	1.17071	19.1947	-4.02946	1.10244e-10	3.23421e-08
ENSRNOG00000046912	Nr1d2	15:8730871-8757165	14.1493	4.37543	1.72151	1.27621e-10	3.70617e-08
ENSRNOG00000001514	Cdca7	3:59153280-59163913	7.51966	26.8398	-1.83068	2.50412e-10	7.19936e-08
ENSRNOG00000052348	Vpreb1	11:88375930-88378357	0.042838	12.7452	-6.80605	2.80454e-10	7.98321e-08
ENSRNOG00000003064	Bst1	14:71797260-71814724	2.02077	18.9198	-3.75284	2.94068e-10	8.28867e-08
ENSRNOG00000012160	Syk	17:12612961-12669573	7.59351	23.4165	-1.84163	3.1246e-10	8.72157e-08
ENSRNOG00000021098	Rasgrp2	1:221773254-221788765	4.45084	20.2806	-2.17502	3.40122e-10	9.40241e-08
ENSRNOG00000001796	Dgkg	11:81972219-82163165	0.602048	2.04432	-1.76878	3.50765e-10	9.60428e-08
XLOC_044032	XLOC_044032	14:78402073-78422829	0	0.464283	-11.35	3.76788e-10	1.02195e-07
ENSRNOG00000034164	Cr2	13:113890272-113927877	0.0514667	1.33041	-4.25112	4.63115e-10	1.24435e-07
ENSRNOG00000043182	Septin6	X:123524950-123662350	4.59221	15.9462	-1.78293	7.36482e-10	1.94256e-07
ENSRNOG00000006950	Padi3	5:159309000-159336429	0.459947	3.57769	-2.94136	8.90153e-10	2.30558e-07
ENSRNOG00000020080	Lrrc18	16:9194182-9430724	0.147323	1.19832	-3.17757	1.064e-09	2.73125e-07
ENSRNOG00000006932	AABR07029272.1	10:19465771-19574094	4.63336	13.451	-1.5301	1.11187e-09	2.82888e-07
ENSRNOG00000055650	Pou2f2	1:81964104-82004538	0.31196	2.52147	-2.94409	1.32414e-09	3.33938e-07
ENSRNOG00000028896	A2m	4:154309426-154359137	7.16635	1.44029	2.33224	1.48255e-09	3.70637e-07
ENSRNOG00000024125	Slain1	15:87886783-87906474	0.0703887	1.41263	-4.31789	1.54414e-09	3.82707e-07
ENSRNOG00000058938	Camkv	8:116715755-116730061	0.019444	1.95465	-6.65816	1.82503e-09	4.48457e-07
ENSRNOG00000034190	Ighm	6:138054662-138816066	27.5928	313.325	-3.62489	1.98265e-09	4.83062e-07
ENSRNOG00000015418	Klhl14	18:12528111-12640716	0.00934433	1.14315	-6.88063	4.57562e-09	1.08718e-06
ENSRNOG00000004409	Sash3	X:134979646-134994349	2.4183	12.9828	-2.41282	4.64971e-09	1.09573e-06
ENSRNOG00000053873	LOC100911215	KL568458.1:144999-165353	0	0.238237	-11.0787	5.01959e-09	1.16382e-06
ENSRNOG00000058446	Il7r	KL567908.1:25355-47617	0.58449	4.55183	-2.96787	5.20712e-09	1.19764e-06
ENSRNOG00000014481	Adtrp	17:22619891-22688307	0.122831	0	11.6101	5.98005e-09	1.35375e-06
ENSRNOG00000005565	Traf3ip3	13:111892760-111917587	0.837408	6.69258	-2.93365	6.40005e-09	1.43751e-06
ENSRNOG00000003094	Cmahp	17:42583945-42640910	0.246771	4.43584	-4.15389	7.53472e-09	1.67925e-06
ENSRNOG00000050224	Stambpl1	1:252497006-252536502	4.32404	17.6081	-2.41774	8.74608e-09	1.93423e-06
ENSRNOG00000004444	Ikzf1	14:91782354-91867424	20.0711	56.483	-1.48597	9.35366e-09	2.05281e-06
ENSRNOG00000015603	Prkce	6:9790422-9973396	2.35484	6.15852	-1.39012	1.03902e-08	2.26301e-06
ENSRNOG00000020743	Cyp2s1	1:82594042-82610350	1.18638	9.17392	-3.18378	1.7507e-08	3.75617e-06
ENSRNOG00000011550	Kcnab2	5:169572517-169658875	5.03489	13.4688	-1.41269	2.19735e-08	4.57782e-06
ENSRNOG00000038740	Gimap7	4:78354335-78358503	0.508019	7.14016	-3.80975	2.24404e-08	4.64145e-06
ENSRNOG00000018991	Gsn	3:14467330-14508911	277.454	111.136	1.3265	2.27479e-08	4.67144e-06
ENSRNOG00000014723	Cbfa2t3	19:55441572-55510460	3.96171	10.2723	-1.40911	2.38017e-08	4.85318e-06
XLOC_009341	XLOC_009341	1:45312632-45342786	0.00121667	0.372935	-8.02003	2.42988e-08	4.91965e-06
ENSRNOG00000017020	Inpp5d	9:94745217-94850771	7.95036	19.96	-1.32631	2.75738e-08	5.54368e-06
ENSRNOG00000025448	Limd2	10:94280660-94355044	4.43401	13.9253	-1.47455	3.40536e-08	6.79889e-06
ENSRNOG00000008919	Arpp21	8:120323897-120491813	0.689547	3.60505	-2.39117	3.8032e-08	7.48918e-06
ENSRNOG00000008622	Creb5	4:83391283-83836351	5.89575	1.90615	1.85892	4.03163e-08	7.88499e-06
ENSRNOG00000019430	Coro1a	1:198123884-198128857	27.6596	108.277	-1.95199	4.29427e-08	8.34192e-06
ENSRNOG00000051986	Plcg2	19:50045020-50173220	5.85015	14.0323	-1.25782	4.99592e-08	9.63978e-06
ENSRNOG00000013309	Pik3ap1	1:260527781-260638915	8.98274	22.6059	-1.32871	5.18755e-08	9.9428e-06
ENSRNOG00000004736	Ralgps2	13:74412192-74564184	2.7575	14.5169	-2.44612	6.1746e-08	1.16789e-05
ENSRNOG00000016846	Pik3cd	5:166602053-166628028	4.64334	14.1741	-1.60528	6.35362e-08	1.1939e-05
ENSRNOG00000024000	Cd22	1:89314558-89329418	1.02357	6.05552	-2.51475	6.49208e-08	1.212e-05
ENSRNOG00000012061	Prkcb	1:192220934-192574831	4.74083	13.6575	-1.53852	7.60909e-08	1.40232e-05
ENSRNOG00000061132	LOC103694210	18:44029927-44141865	0.0323417	0	10.7236	7.82181e-08	1.43234e-05
ENSRNOG00000036880	Arl5c	10:85941176-85948655	0.144419	5.36504	-4.68397	8.10738e-08	1.47524e-05
ENSRNOG00000011107	Pcsk1	2:91450162-91497091	10.4827	3.92047	1.41918	8.21475e-08	1.48537e-05
ENSRNOG00000001627	Abi3bp	11:46208075-46369577	23.3765	9.74218	1.26887	8.41478e-08	1.51203e-05
ENSRNOG00000029993	Kynu	3:28416954-28566928	0.118796	0.885849	-3.47298	8.62696e-08	1.53102e-05
ENSRNOG00000021507	Luzp2	1:111849998-113527735	0.454351	0.148461	1.60321	1.19942e-07	2.11554e-05
ENSRNOG00000017803	Apbb1ip	17:90099025-90149894	6.49562	15.2175	-1.22465	1.23523e-07	2.15713e-05
ENSRNOG00000010986	Cmtm7	8:122787283-122841477	7.0856	18.9029	-1.48247	1.29276e-07	2.23897e-05
ENSRNOG00000025691	Pla2g7	9:19935768-19978013	30.4963	12.487	1.2935	1.42126e-07	2.44677e-05
ENSRNOG00000010584	Tmem123	8:5967341-5997383	8.80075	14.2725	-1.76094	1.58423e-07	2.69506e-05
ENSRNOG00000049676	St6galnac5	2:258025177-258052835	0	0.113514	-10.4975	1.84151e-07	3.09611e-05
ENSRNOG00000006003	Ctnna2	4:107881826-108008484	0.02364	0	10.4324	2.0676e-07	3.45602e-05
ENSRNOG00000003683	Glp2r	10:54260290-54323439	0.0483683	0	10.4537	2.23066e-07	3.70702e-05
ENSRNOG00000012439	Bid	4:153442218-153465203	3.9686	12.1969	-1.61449	2.24407e-07	3.70787e-05
ENSRNOG00000003207	Fmnl1	10:91254058-91281418	5.91866	17.6164	-1.56533	2.31561e-07	3.80422e-05
ENSRNOG00000046289	AABR07051556.1	3:16965992-17070441	0.0277163	1.84624	-8.37688	2.39682e-07	3.91527e-05
ENSRNOG00000007664	Tnfrsf13c	7:123453788-123456268	0.0286313	3.20624	-6.60877	2.68973e-07	4.34436e-05
ENSRNOG00000016910	Ralgps1	3:12178853-12415073	0.265918	0.878332	-1.72577	3.58097e-07	5.7196e-05
XLOC_113780	XLOC_113780	5:47393814-47414568	0.00943367	0.866695	-5.98341	3.73776e-07	5.90442e-05
ENSRNOG00000029227	AABR07054469.1	3:155160908-155266952	0.144482	1.8207	-3.81432	4.33996e-07	6.78118e-05
ENSRNOG00000015445	Mal	3:120209647-120233655	1.75362	6.08751	-1.79106	4.91598e-07	7.59862e-05
ENSRNOG00000007049	Bcl11a	14:108826831-108921669	6.30306	16.2311	-1.34726	5.65157e-07	8.68891e-05
ENSRNOG00000013220	Arhgap45	7:12541061-12741296	8.11315	22.0971	-1.4389	5.96852e-07	9.12739e-05
ENSRNOG00000003304	Chad	10:82292110-82296651	49.4167	15.3937	1.68629	6.03459e-07	9.17961e-05
XLOC_047609	XLOC_047609	15:87847056-87885841	0.0804653	0.94355	-3.53615	6.43082e-07	9.73084e-05
ENSRNOG00000013280	Olfm4	15:62406873-62429449	5.51019	19.0086	-1.777	7.11749e-07	0.000106025
ENSRNOG00000053037	AABR07024139.1	KL568432.1:4535-39528	8.8426	3.2691	1.43535	7.24573e-07	0.000107379
ENSRNOG00000016752	Crispld2	19:52647070-52705131	31.1564	14.6586	1.10206	8.06988e-07	0.000118979
ENSRNOG00000024733	Mnd1	2:183073187-183128932	3.40297	8.32677	-1.28637	9.14371e-07	0.000134123
ENSRNOG00000008471	Kif21b	13:52976507-53023103	2.39971	6.96188	-1.53197	1.09466e-06	0.000158947
ENSRNOG00000021285	Celsr1	7:126775516-126913585	0.229085	0.878611	-1.9471	1.1525e-06	0.000166504
ENSRNOG00000017874	Cd53	2:209489279-209537087	10.7461	26.5168	-1.29675	1.21891e-06	0.000175218
ENSRNOG00000000528	Fgd2	20:6929221-6990336	2.12933	7.95892	-1.93791	1.25214e-06	0.000178213
ENSRNOG00000004438	Cntn1	7:133400485-133586677	8.46931	3.53247	1.26609	1.32807e-06	0.000188089
ENSRNOG00000045840	Hist2h4a	4:170763605-170763916	442.963	1383.62	-1.63034	1.34276e-06	0.000189237
ENSRNOG00000000811	Pkib	20:40618128-40712592	0.80802	6.70892	-3.10669	1.38737e-06	0.000194571
ENSRNOG00000007387	Per1	10:55687050-55695994	4.61448	14.9783	-1.69613	1.40555e-06	0.000195555
ENSRNOG00000052407	Btk	X:105360922-105390580	3.3231	10.1702	-1.60529	1.408e-06	0.000195555
ENSRNOG00000024115	C6	2:54460332-54533797	13.7755	4.88516	1.39978	1.45406e-06	0.000200982
ENSRNOG00000025787	Spag6l	11:88424414-88508601	0	0.027562	-10.0634	1.48226e-06	0.0002039
ENSRNOG00000001963	Mx2	11:38035450-38059950	7.02586	0.228627	4.88995	1.55031e-06	0.000211239
ENSRNOG00000036829	Nckap1l	7:145068286-145113507	9.96313	24.5823	-1.22129	1.72285e-06	0.000231457
ENSRNOG00000004110	Trib2	6:41016730-41039437	10.8265	24.9548	-1.20696	1.73616e-06	0.000232161
ENSRNOG00000006604	Thy1	8:48382121-48386935	24.3275	62.8873	-1.36854	1.77956e-06	0.000236862
ENSRNOG00000008180	Lyn	5:16526058-16642648	15.7363	34.0851	-1.10858	1.79842e-06	0.00023827
ENSRNOG00000008005	Akna	5:79184088-79222687	4.15203	10.2722	-1.30264	1.92598e-06	0.000252718
ENSRNOG00000028845	Ebf1	10:23661013-24050209	13.1074	30.1602	-1.26221	1.94263e-06	0.000252718
ENSRNOG00000022480	Atp6v1g3	13:55274199-55288651	0	0.157	-10.0346	2.13536e-06	0.000276539
ENSRNOG00000058275	Spef2	2:58901939-59181863	0.00856967	0	10.0066	2.3578e-06	0.000303976
ENSRNOG00000050430	Vav1	9:9617786-9675110	5.8792	15.6904	-1.40812	2.37745e-06	0.000305142
ENSRNOG00000016957	Igfbp2	9:80118029-80144789	0.167517	1.52686	-3.19877	2.39675e-06	0.000306251
ENSRNOG00000002285	Fam122b	X:157854272-157879928	0.67216	0	12.3985	2.67135e-06	0.000338331
ENSRNOG00000015945	Cd3g	8:49274960-49280901	0.138596	7.7204	-5.76563	2.75627e-06	0.000347556
ENSRNOG00000049749	Med22	3:5453614-5458782	0	2.14707	-12.3128	2.95533e-06	0.00037103
ENSRNOG00000002667	Lamc2	13:70566643-70626252	2.14878	0.619271	1.85183	3.15654e-06	0.000392859
ENSRNOG00000005662	Grm7	4:142780987-143367578	0	0.01828	-12.2638	3.28541e-06	0.000405389
ENSRNOG00000004405	Pigr	13:47572219-47591699	0	0.123846	-10.1199	3.6174e-06	0.000442554
ENSRNOG00000021384	Ankrd44	9:61231988-61557807	4.85898	11.9937	-1.25732	3.77014e-06	0.000458709
ENSRNOG00000018735	Cd74	18:56071478-56080849	21.7697	62.9419	-1.5714	3.97416e-06	0.000478063
ENSRNOG00000021243	Siglec1	3:123612067-123631109	4.2861	0.716195	2.57758	4.48241e-06	0.000536955
ENSRNOG00000009932	Mctp2	1:133324301-133559975	1.25626	3.19981	-1.51041	4.76407e-06	0.000568328
ENSRNOG00000005342	Rassf5	13:47956790-48022333	3.4694	8.6437	-1.20128	5.00825e-06	0.000594988
ENSRNOG00000055790	Nup210l	2:189454340-189574171	4.26081	6.95219	-1.31934	5.08208e-06	0.000601275
ENSRNOG00000018985	Grk2	1:219536220-219544328	22.7499	53.0451	-1.21781	5.22486e-06	0.000615634
XLOC_002294	XLOC_002294	1:82003787-82027042	0.0727757	1.95204	-4.25641	5.48277e-06	0.000638177
ENSRNOG00000015880	Dpep1	19:55982740-55998208	3.33299	0.540234	2.62507	6.15806e-06	0.000713888
ENSRNOG00000020872	Cd5	1:226770744-226791879	0	0.346111	-9.71388	6.66597e-06	0.000769665
ENSRNOG00000000060	Cplx1	14:2194933-2226598	0.0564693	0	9.69295	6.73426e-06	0.000770911
ENSRNOG00000022822	Fam169b	1:129254644-129334292	0.094456	1.29529	-3.70615	6.87685e-06	0.00078146
ENSRNOG00000012942	Satb1	9:2190915-2274629	4.90059	12.02	-1.29753	6.96872e-06	0.000788782
ENSRNOG00000022988	Skint10	5:133048248-133067245	0.0973823	0	9.7395	8.29983e-06	0.000924884
ENSRNOG00000005809	Arhgdib	4:170913923-170932618	45.5965	130.239	-1.49741	8.39945e-06	0.000932372
ENSRNOG00000003069	Cd38	14:71715269-71754672	2.56837	6.75557	-1.39796	8.69603e-06	0.000957896
ENSRNOG00000024233	RGD1559578	10:98090853-98124743	0	0.051495	-9.65583	9.69696e-06	0.00106003
ENSRNOG00000004441	Fcmr	13:47602692-47617064	3.58527	11.0616	-1.625	9.9985e-06	0.00108885
ENSRNOG00000004998	Jakmip1	14:78424960-78469480	0.0152673	2.0752	-7.11239	1.16029e-05	0.00125407
ENSRNOG00000007270	Il12rb2	4:98052842-98141482	0.281299	1.10557	-1.98602	1.2055e-05	0.00129322
ENSRNOG00000032995	AABR07025089.1	16:28072014-28166296	0	0.0823417	-11.806	1.3183e-05	0.00140374
ENSRNOG00000028090	Arhgef18	12:1864854-1998127	4.20615	10.7063	-1.27465	1.34363e-05	0.00142544
ENSRNOG00000004860	Myh9	7:118741110-118792625	0	20.9609	-18.9172	1.36239e-05	0.00144003
ENSRNOG00000057515	AABR07046136.1	AABR07046136.1:10538-12859	0.698868	7.00087	-3.30459	1.57631e-05	0.00162434
ENSRNOG00000055986	AC128789.1	2:60492256-60538088	0	0.0411173	-9.50888	1.5934e-05	0.00163608
ENSRNOG00000007765	Frzb	3:67635607-67668772	70.0438	33.0749	1.08198	1.68277e-05	0.00170751
ENSRNOG00000027380	Upk1b	11:64522130-64553228	0	0.053921	-9.5932	1.68672e-05	0.00170751
ENSRNOG00000005519	Grm3	4:21317695-21560490	0.0316713	0	11.6944	1.7088e-05	0.00172379
ENSRNOG00000037339	Siglec10	1:98512625-98521706	0.968563	5.87912	-2.57137	1.75338e-05	0.00176257
ENSRNOG00000009471	Epsti1	15:60084918-60190363	2.52772	7.01843	-1.48482	1.75956e-05	0.00176263
ENSRNOG00000054371	Prkcg	1:64407114-64433636	0.324449	1.911	-2.56756	1.81569e-05	0.00180626
ENSRNOG00000032247	Bank1	2:241273763-241545250	0.153541	0.7991	-2.31859	1.86894e-05	0.00185283
ENSRNOG00000004706	Vit	6:1147012-1208392	27.4236	14.479	0.921964	1.87621e-05	0.00185365
ENSRNOG00000004772	Cytip	3:44146339-44177689	3.49428	11.0606	-1.69456	2.08163e-05	0.00203561
ENSRNOG00000005410	Cdca7l	6:145740035-145785606	2.44578	5.72721	-1.23023	2.11464e-05	0.00205392
ENSRNOG00000054764	Flt3	12:9360672-9436570	0.62914	1.7801	-1.50317	2.146e-05	0.00207735
ENSRNOG00000051499	Tcf3	7:12144162-12168410	29.4424	57.8103	-0.96176	2.16329e-05	0.00208707
ENSRNOG00000005195	Cst3	3:143219686-143223615	1024.95	530.677	0.95619	2.50096e-05	0.00234976
ENSRNOG00000008738	Tp53i11	3:82081906-82097056	4.82753	12.5189	-1.37391	2.56497e-05	0.00240205
ENSRNOG00000010121	Lef1	2:236195082-236345056	6.45189	15.4715	-1.23236	2.82288e-05	0.00262647
ENSRNOG00000006612	LOC108348082	10:47182433-47203753	0	9.06482	-16.4334	2.88042e-05	0.00267135
ENSRNOG00000017100	Yme1l1	17:89704102-89741321	0	4.72292	-16.2966	2.9786e-05	0.0027447
ENSRNOG00000032472	Adgrg2	X:36930186-37003642	2.93934	1.21783	1.2653	3.00191e-05	0.00275001
ENSRNOG00000009837	Tmem131l	2:182897830-183031214	10.7735	24.2916	-1.12255	3.00348e-05	0.00275001
ENSRNOG00000009342	Fcnb	3:6617751-6626284	30.416	83.3824	-1.44008	3.02647e-05	0.00276226
ENSRNOG00000021261	Rassf2	3:124571108-124610267	5.5604	14.1723	-1.28033	3.09541e-05	0.00280735
ENSRNOG00000008850	Ttc5	15:27687057-27739269	2904.7	7.11539	5.90409	3.2927e-05	0.00295828
ENSRNOG00000013647	Polm	14:86069016-86078954	1.22998	6.87725	-2.48605	3.37796e-05	0.00302544
ENSRNOG00000010994	Has1	1:59720612-59732409	3.10883	0.574061	2.42865	3.39184e-05	0.00302842
ENSRNOG00000005695	Mgp	4:170856751-170860225	683.22	336.892	1.02717	3.61827e-05	0.00320051
ENSRNOG00000052391	Sh3bp5	16:7473370-7538201	8.12754	16.3107	-0.999873	3.62909e-05	0.00320051
ENSRNOG00000031058	Was	X:15155230-15164105	5.71681	17.2664	-1.57937	3.68647e-05	0.00324087
ENSRNOG00000013067	Phf21b	7:125649688-125720775	0.108853	0.927992	-3.25006	3.69741e-05	0.00324087
ENSRNOG00000000636	Rtkn2	20:21932878-22004279	1.37839	4.48436	-1.63508	3.75936e-05	0.00328207
ENSRNOG00000050994	Cttn	1:215255381-215290845	3.60568	0	15.8489	3.76725e-05	0.00328207
ENSRNOG00000056621	AC099384.2	14:10685203-10714551	0.92146	5.2132	-2.45353	3.86191e-05	0.00335438
ENSRNOG00000002089	Ccng2	14:16267573-16276068	7.2251	18.9239	-1.39018	3.93508e-05	0.00340764
ENSRNOG00000002304	Tnfrsf13b	10:47412582-47423149	0.159923	1.7635	-4.23317	3.96269e-05	0.00342124
ENSRNOG00000006804	Ppp1r42	5:8916633-8956119	0.0358163	0	9.38268	4.26194e-05	0.00366668
ENSRNOG00000019374	Csk	8:62405715-62424303	24.652	48.8789	-0.98247	4.27247e-05	0.00366668
ENSRNOG00000023337	Sema3a	4:18178656-18396035	4.93885	2.2845	1.10274	4.38422e-05	0.00374025
ENSRNOG00000033433	Csrnp1	8:128659868-128672284	2.94133	8.8307	-1.58137	4.56612e-05	0.00383848
ENSRNOG00000011523	Macroh2a1	17:9282675-9344678	37.6501	70.7402	-0.923468	4.65459e-05	0.00390035
ENSRNOG00000019838	Gmfg	1:85312528-85317968	23.9446	60.2129	-1.32103	4.66733e-05	0.00390035
ENSRNOG00000038881	Hcls1	11:66736966-66759402	10.2369	22.5869	-1.13149	4.68042e-05	0.00390035
ENSRNOG00000013228	Scrg1	16:36125904-36161089	35.4842	16.4193	1.11157	4.77376e-05	0.00396663
ENSRNOG00000001036	Rsph10b	12:12665194-12712742	0.034548	0	9.13163	5.02433e-05	0.00413378
ENSRNOG00000037198	Usp18	4:153805993-153834430	3.91803	0.273114	3.81556	5.03243e-05	0.00413378
ENSRNOG00000009267	B3gnt2	14:107592336-107617161	17.5953	37.33	-1.07666	5.16107e-05	0.00422737
ENSRNOG00000038540	NEWGENE_2724	11:74014983-74018075	0	1.4325	-10.9893	5.60088e-05	0.00454873
ENSRNOG00000016090	Mtmr10	1:125124743-125175857	10.5119	5.34821	0.971477	5.64271e-05	0.0045698
ENSRNOG00000036897	Defb24	3:148051263-148057523	0	0.204805	-9.20944	5.90788e-05	0.00477111
ENSRNOG00000004192	Arhgap30	13:89774764-89796113	5.2358	12.6728	-1.26961	6.06048e-05	0.00486701
ENSRNOG00000009705	Lck	5:147750973-147761983	1.10872	4.60564	-2.05458	6.12413e-05	0.00490442
ENSRNOG00000022009	Mzb1	18:28436548-28438654	0.754355	9.74605	-3.64538	6.29399e-05	0.00502645
ENSRNOG00000013774	Lmnb1	18:51785111-51822264	34.2447	65.8034	-0.933979	6.3721e-05	0.00507473
ENSRNOG00000003866	Cxcr4	13:45314933-45318878	16.3385	45.9597	-1.47977	6.43931e-05	0.00511409
ENSRNOG00000009760	Palm	7:12708015-12793711	11.0328	22.2045	-1.00434	6.88092e-05	0.00544976
ENSRNOG00000031852	Lsamp	11:58803140-59110562	2.31773	1.14939	0.991354	7.01936e-05	0.00552895
ENSRNOG00000053327	AABR07060953.1	4:101639635-101910348	0.0312337	1.1794	-5.09142	7.11444e-05	0.00558575
ENSRNOG00000051433	LOC103692167	4:114776797-114779446	1.56187	0	10.9248	7.13033e-05	0.00558575
ENSRNOG00000009271	Smarca4	8:22648323-22739468	24.4771	45.4584	-0.891178	7.465e-05	0.00581623
ENSRNOG00000018416	Ttbk1	9:16862248-16902199	0	0.035826	-9.37236	7.70077e-05	0.0059837
ENSRNOG00000033912	Fcho1	16:20136008-20148867	4.74551	11.772	-1.30657	8.70946e-05	0.0067311
ENSRNOG00000039560	LOC103690116	17:15475710-15484269	19.4223	6.69694	1.53222	8.78597e-05	0.00677203
ENSRNOG00000009184	Foxp1	4:131366744-131694755	10.0526	19.6433	-0.965034	8.81123e-05	0.00677334
ENSRNOG00000057981	AABR07057170.1	7:58570481-58580844	0	0.1639	-9.13612	8.8386e-05	0.00677626
ENSRNOG00000056558	Gabra3	X:152414615-152642531	0.0195583	0	10.8806	9.30689e-05	0.00709743
ENSRNOG00000050860	Abcb11	3:55480024-55587946	0.10954	0.448179	-2.02304	9.5031e-05	0.00721847
ENSRNOG00000058003	Spon1	1:178636544-178935051	5.76141	10.9024	-0.917183	9.51582e-05	0.00721847
ENSRNOG00000012749	C1qb	5:155246447-155252003	50.6194	22.8987	1.14945	9.88719e-05	0.00748044
ENSRNOG00000024452	Carmil2	19:37652969-37668019	0.612961	2.71586	-2.14182	0.00010266	0.00774664
ENSRNOG00000048982	LOC100912282	7:144307509-144322240	0	2.45261	-13.8959	0.000103967	0.00782478
ENSRNOG00000059140	Myo1g	14:86771870-86803376	4.69394	14.9024	-1.78829	0.000104331	0.00783165
ENSRNOG00000016434	Prkd2	1:78767911-78796231	4.25964	10.3439	-1.31953	0.000105829	0.00792282
ENSRNOG00000017496	Cnp	10:88490798-88497356	9.6214	24.8082	-1.36651	0.00010624	0.00792282
ENSRNOG00000018911	Pfkfb3	17:70684134-70713726	14.5727	8.60822	1.09698	0.000106417	0.00792282
ENSRNOG00000020716	Axl	1:82549420-82580761	32.4712	17.8924	0.884694	0.000108148	0.00799291
ENSRNOG00000040242	Epm2a	1:5448958-5571512	1.47818	0.527084	1.47622	0.000108511	0.00799919
ENSRNOG00000010813	Tspan14	16:17538855-17595960	22.1855	41.23	-0.889093	0.000109242	0.00802695
ENSRNOG00000023969	Herc6	4:88607518-88649216	3.35023	0.578191	2.51332	0.00011133	0.00814438
ENSRNOG00000026902	Lyve1	1:175663266-175676699	9.81416	3.93641	1.31649	0.000112541	0.00820295
ENSRNOG00000043451	Spp1	14:6673686-6679901	1125.66	625.551	0.849778	0.000114148	0.00827093
ENSRNOG00000004003	Dusp10	13:104284660-104321455	1.71533	4.89913	-1.51218	0.000114304	0.00827093
ENSRNOG00000024952	Atp8b1	18:60013382-60095354	3.13571	1.46866	1.09125	0.000114498	0.00827093
ENSRNOG00000050586	AABR07034362.2	11:67451549-67529062	2.74565	9.84417	-1.89168	0.000115126	0.0082747
ENSRNOG00000026310	Marchf1	16:25001666-25192675	0.831433	2.34466	-1.44111	0.000116599	0.00835967
ENSRNOG00000049870	AABR07065812.2	6:142177345-142178771	0	0.784583	-9.02301	0.000129599	0.00923509
ENSRNOG00000062125	Aox3	9:65013862-65099433	7.60348	3.69677	1.14366	0.000129773	0.00923509
ENSRNOG00000061379	C7	2:54709138-54777729	8.49003	4.10435	1.0507	0.000130434	0.00925923
ENSRNOG00000049403	LOC108348294	13:43491967-43606509	1.98649	4.84754	-1.40562	0.000131085	0.00928252
ENSRNOG00000008025	Bend5	5:131257127-131312335	0.699171	2.1098	-1.73716	0.000132904	0.00938821
ENSRNOG00000006079	Psd4	3:1478525-1514934	2.73992	6.12041	-1.15718	0.000140247	0.00985844
ENSRNOG00000056017	Bcl7a	12:38662303-38691075	8.97502	17.6201	-0.967417	0.000141122	0.00989575
ENSRNOG00000003748	RGD1565785	X:54390733-54409466	0.715627	2.84632	-1.98987	0.000142849	0.00996819
ENSRNOG00000015357	Bmper	8:24369916-24615479	2.85919	1.56885	0.864198	0.000150254	0.0104596
ENSRNOG00000016810	Stmn1	5:152680407-152686806	63.639	143.037	-1.17961	0.000151618	0.010529
ENSRNOG00000000321	Cd24	20:48335540-48340846	71.6578	129.872	-0.85624	0.000160502	0.0109867
ENSRNOG00000011789	Cdon	8:36625733-36710949	20.1	10.5736	0.921423	0.000163145	0.0111412
ENSRNOG00000019607	Bglap	2:187741770-187742747	151.17	387.349	-1.37286	0.000166775	0.011362
ENSRNOG00000013407	Slc5a11	1:193187972-193226649	0.0238257	0	8.72624	0.000170045	0.0114797
ENSRNOG00000018804	Ripor2	17:42324594-42422053	3.53343	6.89093	-0.958284	0.000170099	0.0114797
ENSRNOG00000031939	AABR07066416.1	9:8629216-8632017	0.303754	0	8.63397	0.000171083	0.0115191
ENSRNOG00000019622	Ackr3	9:97355924-97367445	22.1634	10.6752	1.05329	0.000174074	0.0116658
ENSRNOG00000061777	AABR07024203.3	AABR07024203.1:27105-49934	1.11518	0	13.3484	0.000187743	0.0125235
ENSRNOG00000009076	Ttpal	3:159995064-160013274	6.85814	14.4297	-1.0725	0.000200533	0.013305
ENSRNOG00000031445	LOC100361866	15:28154482-28241198	1.28116	13.4892	-3.37804	0.000200847	0.013305
ENSRNOG00000048049	LOC103689951	1:215298161-215310013	1.65958	0	13.2082	0.000202817	0.0134046
ENSRNOG00000025881	Rbms3	8:124661839-125645898	5.46373	2.99444	0.867655	0.000207631	0.0136599
ENSRNOG00000055286	LOC103689986	1:88182155-88192969	1.91055	0	13.1825	0.000213401	0.0140075
ENSRNOG00000013529	Stk4	3:160467552-160546540	14.5268	26.5656	-0.88044	0.00021535	0.0141032
ENSRNOG00000003469	MAST1	19:26026043-26053762	0.00915367	0.298274	-4.95902	0.000221036	0.01441
ENSRNOG00000026110	Scml4	20:47596575-47689245	0.0850707	0.467868	-2.78281	0.000237867	0.0154024
ENSRNOG00000019082	LOC103690016	1:67368384-67390141	1.0832	3.41183	-1.64905	0.000238507	0.0154091
ENSRNOG00000004476	Wif1	7:63094911-63165159	29.3224	16.7667	0.807946	0.000244203	0.0157418
ENSRNOG00000005731	Birc3	8:6048969-6076598	2.03734	5.01764	-1.29381	0.000246754	0.0158352
ENSRNOG00000012238	Clec3a	19:46646253-46743593	513.297	274.212	0.885276	0.000250278	0.0160256
ENSRNOG00000058352	AABR07065699.4	6:139405938-139531627	0.289915	3.26508	-3.56079	0.000253611	0.0162029
ENSRNOG00000019271	Ulk4	8:129632149-129919120	0.51962	1.05646	-1.02671	0.00025647	0.0162945
ENSRNOG00000052555	Hist2h2aa2	2:198388809-198389201	507.292	1048.72	-1.03948	0.000256745	0.0162945
ENSRNOG00000017890	Crhbp	2:25141471-25153334	0	0.067589	-8.54796	0.000257682	0.016318
ENSRNOG00000000655	Ptprc	13:55061562-55173692	9.88411	19.8403	-1.01314	0.000267741	0.0168806
ENSRNOG00000022760	Rubcnl	15:57065428-57102599	0.946063	2.65462	-1.48629	0.000270901	0.0170424
ENSRNOG00000013656	Lpar1	5:75557042-75676584	30.7179	16.9763	0.855205	0.000273469	0.0171329
ENSRNOG00000022635	Dlg2	1:156552328-157269747	0.370602	1.36843	-2.10014	0.000274306	0.0171329
ENSRNOG00000001959	Mx1	11:37891156-37914983	4.9202	0.440995	3.4512	0.000275354	0.0171352
ENSRNOG00000049033	Racgap1	7:141277312-141307233	11.0247	20.2988	-0.879465	0.000277358	0.0172226
ENSRNOG00000012284	Khdrbs2	9:39539530-40008680	0.16494	0.0404813	2.01597	0.000280306	0.0173308
ENSRNOG00000012804	C1qc	5:155255005-155258392	61.4892	28.7217	1.10368	0.000283327	0.01743
ENSRNOG00000004839	B4galnt1	7:70452579-70462143	4.05409	13.7182	-1.82708	0.000284336	0.01743
ENSRNOG00000002599	Grap	10:47930633-47949773	1.43201	4.17959	-1.53929	0.000285386	0.0174571
ENSRNOG00000030575	AABR07013111.1	2:223029559-223045248	0	0.247346	-10.2716	0.000295132	0.0179388
ENSRNOG00000050404	Pmepa1	3:171294856-171342646	23.8801	13.2109	0.857992	0.000298309	0.0180936
ENSRNOG00000023143	Nlrp1a	10:57692474-57822498	1.79375	3.50106	-0.969791	0.000299598	0.0181336
ENSRNOG00000008510	Abtb2	3:93495106-93647721	5.57338	3.08627	0.851517	0.000307605	0.0185791
ENSRNOG00000005196	Slc12a6	3:103753238-103852686	6.70229	14.7154	-1.13833	0.000313071	0.0188696
ENSRNOG00000002154	Mepe	14:6782012-6793558	28.8517	15.0906	0.938474	0.000315092	0.0189517
ENSRNOG00000018958	Mt3	19:11324698-11326139	23.9723	65.9984	-1.46338	0.000330199	0.0197775
ENSRNOG00000010625	Dnmt3b	3:149131785-149208786	1.29339	2.9178	-1.17564	0.000331073	0.0197886
ENSRNOG00000033372	Klhl24	11:84602597-84633504	16.972	33.5499	-0.985671	0.000334114	0.019929
ENSRNOG00000026577	Cpne4	8:113086413-113586418	0.01643	0.166425	-2.51231	0.000349971	0.0206182
ENSRNOG00000019128	St8sia4	9:103117506-103207190	4.54337	8.83228	-0.955241	0.000363909	0.0213083
ENSRNOG00000009331	Hck	3:148579920-148623033	7.93956	16.3085	-1.0265	0.000367678	0.0214417
ENSRNOG00000016890	Tppp3	19:37424324-37427989	39.6534	16.6437	1.25394	0.000369068	0.0214792
ENSRNOG00000011989	Vat1l	19:46525919-46693838	0.80873	0.356327	1.18623	0.000388466	0.0225169
ENSRNOG00000012165	Itprid1	4:86125316-86233804	0	0.0219017	-8.91187	0.000389546	0.0225169
ENSRNOG00000036711	Spn	1:198570635-198585672	7.96507	19.3671	-1.15654	0.000392001	0.0225169
ENSRNOG00000046660	Gpc6	15:102164751-103170847	28.4093	15.169	0.901444	0.000393344	0.0225169
ENSRNOG00000000814	Fabp7	20:40769586-40773349	0.192817	0	8.39805	0.000393537	0.0225169
ENSRNOG00000051307	Aoc3	10:89251370-89259313	41.2279	21.4117	0.947256	0.000393947	0.0225169
ENSRNOG00000029212	Vcan	2:18490102-18565842	21.2812	13.1756	0.778155	0.000397926	0.022669
ENSRNOG00000002158	Ibsp	14:6801204-6813945	546.059	294.978	0.897963	0.000398186	0.022669
ENSRNOG00000017307	Prss23	1:153732532-153752541	17.948	9.18916	0.953596	0.000402648	0.0228777
XLOC_012193	XLOC_012193	1:137408442-137427306	7.05616	17.8474	-1.32854	0.000404416	0.0229032
ENSRNOG00000050004	LOC100909761	9:37727942-37747514	0	0.586729	-12.2875	0.000407507	0.0230174
ENSRNOG00000005275	Shmt1	10:47031050-47059216	2.98003	6.51254	-1.12479	0.000409435	0.0230809
ENSRNOG00000038132	Vsig4	X:65370851-65400298	3.0607	0.132775	4.52795	0.000410546	0.0230982
ENSRNOG00000013850	Hes5	5:172364421-172365188	0.00765767	1.21553	-6.88313	0.000434441	0.0243
XLOC_140475	XLOC_140475	8:46238618-46287172	3.82949	7.50704	-0.973033	0.000440775	0.0245527
ENSRNOG00000016164	Fcrl2	2:186595051-186606172	0.781846	4.20929	-2.44431	0.000441522	0.0245527
ENSRNOG00000017737	Dgkz	3:80844005-80875817	15.5493	28.7443	-0.875006	0.000446209	0.0247655
ENSRNOG00000002041	Boc	11:61083757-61158838	22.8911	12.7256	0.843936	0.000457006	0.0252423
ENSRNOG00000026328	Gpr137c	15:19547871-19614805	0.0324047	0	9.98153	0.000461099	0.0253472
ENSRNOG00000004158	Hdac9	6:53488883-54059119	1.07719	2.06875	-0.927443	0.000469116	0.0256252
ENSRNOG00000003715	Srpx2	X:104734082-104760547	39.7629	21.6232	0.879318	0.000469722	0.0256252
ENSRNOG00000051848	AABR07032622.1	18:74006046-74102785	0	0.0344087	-10.5776	0.000483512	0.0262283
ENSRNOG00000010708	Gata4	15:46386712-46432965	0	0.014278	-8.2692	0.000494297	0.0267402
ENSRNOG00000027730	Nxpe1	8:52741054-52764328	1.72661	6.623	-1.9452	0.00051787	0.0278294
ENSRNOG00000009031	Gucy2c	4:170659998-170740274	0.0139103	0.847379	-5.85433	0.000524134	0.0278919
ENSRNOG00000001369	Oas1a	12:41200718-41211909	3.86619	0.589659	2.69302	0.000524466	0.0278919
ENSRNOG00000007243	Havcr1	10:31813814-31849184	0.0371717	0.464783	-3.41741	0.000524746	0.0278919
ENSRNOG00000023943	Gbp1	2:248398917-248409570	0.233512	0	10.1317	0.000524975	0.0278919
ENSRNOG00000017869	Irf8	19:54314865-54336640	7.83497	15.444	-0.9791	0.000525822	0.0278919
ENSRNOG00000004730	Meis2	3:107559997-107760589	0.261789	0.073373	1.84154	0.000526834	0.0278941
ENSRNOG00000003296	Dck	14:20935369-20953095	26.5844	48.4123	-0.854941	0.000532001	0.0281159
ENSRNOG00000018238	Nuggc	15:49010492-49055237	0.00860533	0.452418	-5.57526	0.000534254	0.0281831
ENSRNOG00000027839	Ptk2b	15:42827310-42947656	6.31968	11.2838	-0.825063	0.00054714	0.0287049
ENSRNOG00000058590	AABR07034739.3	11:86093649-86097174	0.138817	2.49015	-3.91081	0.000556817	0.029016
ENSRNOG00000015488	Tead1	1:177495561-177717449	8.65605	5.90659	1.12284	0.000557107	0.029016
ENSRNOG00000052064	Parvg	7:125288081-125306976	5.43967	12.9554	-1.24027	0.00055933	0.0290791
ENSRNOG00000007422	Vav2	3:5811504-5976244	4.97569	8.79907	-0.831883	0.000565322	0.0292847
ENSRNOG00000050110	Stfa2	11:67465236-67470941	1.95786	8.38114	-2.10813	0.000566877	0.0293124
ENSRNOG00000033280	Pam	9:111028575-111177602	73.3599	42.0808	0.801932	0.000568167	0.0293264
ENSRNOG00000006526	Sema3c	4:14318274-14490446	21.1765	12.0639	0.80952	0.000579929	0.0298638
ENSRNOG00000003734	AABR07041600.1	X:134539398-134541531	0.95828	0	9.84626	0.000582495	0.0298638
ENSRNOG00000005573	Ntn4	7:34533543-34649481	5.73415	3.0026	0.930625	0.000582733	0.0298638
ENSRNOG00000011153	Il17ra	4:152995865-153018394	16.2556	29.9593	-0.878726	0.000587419	0.0299966
ENSRNOG00000003769	Tmem163	13:44166042-44345735	0.059295	0.443695	-2.68098	0.000605036	0.0306246
ENSRNOG00000008001	Rab3b	5:128501847-128568188	0	0.0289007	-9.78227	0.000613337	0.0309657
ENSRNOG00000054508	Foxp2	4:41364331-41942023	1.26867	0.564198	1.06178	0.000624974	0.0314676
ENSRNOG00000009258	Cdk6	4:27785647-27966398	14.6116	24.6451	-0.755211	0.000654591	0.0326161
ENSRNOG00000003720	Prrx1	13:81147348-81214546	25.5273	15.2565	0.743062	0.000656628	0.0326313
ENSRNOG00000001525	Igsf11	11:64286694-64421248	0.561671	0.195609	1.51545	0.000662548	0.0327808
ENSRNOG00000011762	Elf1	15:61826711-61868343	13.1121	23.4031	-0.823416	0.000663597	0.0327808
ENSRNOG00000016378	Map3k8	17:56109549-56129919	1.76092	4.51922	-1.35789	0.000665484	0.0328176
ENSRNOG00000053430	Slco4a1	3:175838994-175857983	0.443704	1.84674	-2.04141	0.000677801	0.033239
ENSRNOG00000004009	Xpnpep2	X:134940615-134969996	0.0972447	0.57284	-2.54765	0.000680965	0.033239
ENSRNOG00000001912	Tecrl	14:26662965-26737657	0.024558	0	9.74652	0.000685296	0.0333936
ENSRNOG00000013321	Dock11	X:122507374-122690465	4.51813	8.37989	-0.892103	0.000695114	0.0338148
ENSRNOG00000037632	LOC688553	14:89253373-89273137	0.149794	0.989164	-2.70602	0.000703226	0.034094
ENSRNOG00000005888	Fsip1	3:109969152-110021149	0.565546	1.673	-1.56096	0.000709562	0.0342901
ENSRNOG00000017273	RGD1563917	9:92751829-92775816	0.609934	3.52789	-2.26612	0.000728068	0.0349577
ENSRNOG00000011140	Prxl2a	16:17493953-17513870	6.81956	13.8953	-1.01752	0.000728336	0.0349577
ENSRNOG00000006048	Ezh2	4:77284404-77347011	13.1794	23.4302	-0.825408	0.000732559	0.0350434
ENSRNOG00000016595	Hhex	1:256101903-256107649	2.03489	7.11071	-1.8045	0.000736427	0.0351699
ENSRNOG00000027869	Sox5	4:178066165-178441547	13.9491	7.61008	0.880372	0.000744974	0.0355191
ENSRNOG00000032350	Kcnip4	14:66598259-66749178	0.279536	0.0624853	2.14563	0.000755858	0.0358928
ENSRNOG00000013994	Enpp1	1:21748261-21813371	32.6306	19.7161	0.728832	0.000756557	0.0358928
ENSRNOG00000008310	Mpo	10:75087892-75098260	62.0491	175.772	-1.45568	0.000765188	0.0361432
ENSRNOG00000051758	LOC100910554	17:44737957-44758168	129.961	304.553	-1.21047	0.000777604	0.0365124
ENSRNOG00000018830	Aff3	9:44839960-45292047	8.08706	13.7655	-0.769655	0.000778508	0.0365124
ENSRNOG00000011977	Sema5a	2:85377318-85808970	14.6258	8.47953	0.783259	0.000790906	0.0370217
ENSRNOG00000013397	Foxo1	2:141451234-141527016	10.0908	16.9352	-0.747875	0.000791943	0.0370217
ENSRNOG00000015894	Dock8	1:242959488-243153465	25.2183	41.2583	-0.769583	0.00079932	0.0373059
ENSRNOG00000014061	Dusp5	1:274245184-274258595	1.81951	4.94024	-1.4407	0.000801561	0.0373499
ENSRNOG00000026053	Grem1	3:105203309-105214989	15.2393	7.33433	1.05552	0.00080889	0.0376304
ENSRNOG00000030726	Asgr2	10:56710464-56723611	0.828307	0.108938	2.91639	0.000814955	0.0378513
ENSRNOG00000010646	Tmem229b	6:102152147-102196138	3.5735	6.94785	-0.960771	0.000825747	0.038229
ENSRNOG00000049964	LOC103690044	1:271229036-271243517	0.121763	0	9.63693	0.000835819	0.0384477
ENSRNOG00000033256	LOC691141	8:22559098-22576154	4.43503	10.5175	-1.20889	0.000858521	0.0394289
ENSRNOG00000049829	AABR07060872.1	4:98337367-98523502	20.4307	96.7155	-2.23816	0.00086902	0.0398474
ENSRNOG00000047158	Selenbp1	2:195416469-195423787	1.0572	0	11.7656	0.000870564	0.0398546
ENSRNOG00000004018	Tdrd5	13:73872621-73921969	0.0754103	0.379831	-2.31724	0.000876393	0.0399941
ENSRNOG00000049282	Oas2	12:41340815-41363161	1.07612	0.129663	3.04257	0.000884093	0.0402178
ENSRNOG00000014294	Ptpn6	4:157239142-157263890	14.5203	33.9889	-1.21755	0.000888005	0.0402958
ENSRNOG00000060293	Ndufa3	1:64172393-64239687	27.4196	12.7181	0.878638	0.000888611	0.0402958
ENSRNOG00000005998	Smoc1	6:104718512-104877980	34.3153	19.8564	0.789784	0.000895923	0.0405635
ENSRNOG00000027026	Jazf1	4:82836260-83137527	2.61882	1.52185	0.783001	0.000903084	0.0407593
ENSRNOG00000030246	Btla	11:60521356-60547499	0.744561	2.10156	-1.88317	0.000920648	0.0414869
ENSRNOG00000043085	Clstn2	8:105323837-105462168	1.5499	0.688798	1.17062	0.000926602	0.0416247
ENSRNOG00000004443	Sptlc3	3:132560506-132692737	2.63427	1.22697	1.09645	0.00093121	0.0417664
ENSRNOG00000054277	Capsl	2:58724855-58747843	0	0.0726183	-9.58998	0.000936895	0.0418907
ENSRNOG00000038286	Slamf6	13:90300853-90322457	0.371504	1.67933	-2.07478	0.000951224	0.0423995
ENSRNOG00000014555	Aox4	9:65110325-65167192	0	0.00845033	-7.78207	0.000956903	0.0425866
ENSRNOG00000012779	Msr1	16:56813791-56900052	2.16478	0.768949	1.5267	0.000971174	0.0431137
ENSRNOG00000060898	LOC100910418	16:73755539-73763312	0	0.817439	-11.5184	0.000971745	0.0431137
ENSRNOG00000028541	Btnl2	20:4141878-4154978	0	0.041353	-7.85465	0.000973484	0.0431243
ENSRNOG00000014193	Lig1	1:75356220-75394758	11.3882	19.2356	-0.749632	0.00100052	0.0441856
ENSRNOG00000019584	Dlk1	6:133552821-133583751	62.3007	29.5414	1.07157	0.00100692	0.0444004
ENSRNOG00000008292	Hif1a	6:96810907-96856052	53.1444	32.0424	0.728564	0.00101225	0.0445669
ENSRNOG00000034195	Bpi	3:154741631-154768640	0	0.0251753	-8.3157	0.00102257	0.0449524
ENSRNOG00000052572	Aff2	X:153539668-154051181	1.29292	0.681108	0.891211	0.00103608	0.0453385
ENSRNOG00000003835	Slc43a2	10:63677396-63719283	6.00521	10.9055	-0.857378	0.00104136	0.0455001
ENSRNOG00000009385	Pik3cg	6:51465908-51498337	3.96788	7.813	-0.972352	0.00108261	0.0469486
ENSRNOG00000026039	Tspan32	1:216176430-216227495	0.821142	2.67524	-1.62279	0.00108844	0.0470714
ENSRNOG00000003098	Prom1	14:71533063-71637417	2.62146	6.48405	-1.30498	0.00108878	0.0470714
ENSRNOG00000006052	Sulf2	3:162791355-162872831	17.1549	10.4804	0.712777	0.00110355	0.0475667
ENSRNOG00000061348	Fam53b	1:204714473-204817080	23.3939	41.4373	-0.743058	0.00110697	0.0476429
ENSRNOG00000002014	Stap1	14:23568956-23604834	1.17524	4.04969	-1.90058	0.00112426	0.0482425
ENSRNOG00000014007	Gfod1	17:23823632-23923792	5.33622	9.22101	-0.788863	0.00113266	0.0484011
ENSRNOG00000048159	AABR07065778.3	6:141060650-141089166	0.0156737	0.941178	-5.39665	0.00113717	0.048501
ENSRNOG00000017022	Cerk	7:127015162-127058056	11.1656	19.0907	-0.771368	0.00114041	0.048501
ENSRNOG00000013729	RGD1306271	4:65834035-65962712	5.26838	2.637	0.929947	0.00116555	0.0492789
ENSRNOG00000027733	Lair1	1:73837944-73868695	0	0.0544303	-9.5888	0.00117179	0.0493973
ENSRNOG00000059801	Lima1	7:141428063-141528397	12.458	7.62136	0.707639	0.00118231	0.0497679
ENSRNOG00000017021	Galnt18	1:176296193-176607466	7.05391	3.99622	0.816345	0.00119259	0.0500542
ENSRNOG00000029308	Lrmp	4:179382752-179441819	5.75339	12.5578	-1.16512	0.00122375	0.0512122
ENSRNOG00000005404	Rasgrp1	3:108984029-109044564	1.80963	4.13503	-1.17699	0.00125316	0.0522908
ENSRNOG00000000053	Crp	13:91054974-91093713	0.0339577	0.44082	-3.44246	0.00129506	0.0538048
ENSRNOG00000018394	Chrdl2	1:165008912-165036435	2.78405	1.11655	1.32645	0.00131961	0.0545098
ENSRNOG00000032989	Lrrn4	3:125523781-125533600	0	0.042541	-7.60296	0.00133416	0.0550315
ENSRNOG00000023622	LOC100910021	8:106863494-106870994	0	0.659372	-11.1482	0.00133977	0.0550665
ENSRNOG00000011716	Degs2	6:132591969-132608600	2.78521	8.76826	-1.62347	0.0013412	0.0550665
ENSRNOG00000012807	C1qa	5:155261250-155264143	66.1165	33.1327	1.00105	0.00134187	0.0550665
ENSRNOG00000000502	Def6	20:7788084-7809560	7.39023	13.5294	-0.868742	0.00134266	0.0550665
ENSRNOG00000003435	Mcf2	X:143154209-143274180	0	0.012017	-9.37766	0.00135071	0.0553173
XLOC_079707	XLOC_079707	2:145011209-145403003	2.37248	1.63662	0.813666	0.00136107	0.0555045
ENSRNOG00000005679	Fap	3:48467781-48536235	18.5535	11.3994	0.721213	0.00138383	0.0561936
ENSRNOG00000014550	Plcxd3	2:54191538-54360780	0.292212	0.0676153	2.11476	0.00138664	0.0562285
ENSRNOG00000004275	Egfl6	X:29430831-29488739	1.77905	3.6118	-1.02946	0.00139703	0.0564865
ENSRNOG00000032970	Gpr174	X:78372257-78399944	0.178004	0.839992	-2.24352	0.00140109	0.0564865
ENSRNOG00000021155	Ctsk	2:196655469-196666446	1046.98	628.403	0.740904	0.00140191	0.0564865
ENSRNOG00000023794	Mei4	8:89369417-89556942	0.216155	0.065652	1.72476	0.00140283	0.0564865
ENSRNOG00000022839	Ifit3	1:252906234-252911382	5.57688	0.841271	2.70214	0.00144906	0.0581039
ENSRNOG00000048268	AABR07015067.1	14:46588411-46593828	0.933238	0	11.2492	0.00145268	0.0581678
ENSRNOG00000058460	AABR07051551.2	3:16846412-17155153	0.522406	1.67997	-4.22584	0.00145853	0.0583209
ENSRNOG00000060463	AABR07062799.2	6:9482869-9684638	1.36678	3.26834	-1.34908	0.00146324	0.0584278
ENSRNOG00000000394	Srgn	20:32120320-32139789	73.1552	185.375	-1.3161	0.00148317	0.0590598
ENSRNOG00000015310	Lrrc32	1:163445527-163457424	2.73949	6.73531	-1.29636	0.00149254	0.0592924
ENSRNOG00000002832	Slc16a2	X:74577131-74706214	4.89119	2.67748	0.866757	0.00149314	0.0592924
ENSRNOG00000059929	AABR07065774.1	6:140805042-140805597	0.138449	3.50982	-4.45611	0.00151035	0.0597094
ENSRNOG00000008904	Fli1	8:33543258-33661049	10.0101	17.0672	-0.765628	0.00151195	0.0597094
ENSRNOG00000015957	F13a1	17:28504623-28680362	56.3298	33.6752	0.740418	0.00152099	0.059869
ENSRNOG00000002372	Sgcd	10:32054935-32471622	10.735	6.31497	0.723646	0.00152159	0.059869
ENSRNOG00000004726	Mapkapk2	13:47785161-47831110	36.1383	58.8147	-0.700021	0.00152223	0.059869
ENSRNOG00000023661	Celf2	17:75307220-75654951	6.60867	15.6259	-1.50417	0.00153634	0.0602588
ENSRNOG00000004448	Acss3	7:49047013-49250957	3.93109	2.15986	0.924417	0.00154534	0.0605293
ENSRNOG00000015654	Ghr	2:53150370-53413638	48.4379	27.8718	0.739001	0.00155612	0.0607928
ENSRNOG00000021510	Tbc1d10c	1:219431997-219438779	1.61786	5.85231	-1.94266	0.00156282	0.0609648
ENSRNOG00000018251	Mrc1	17:81352700-81433743	24.2319	14.8632	0.710656	0.00157837	0.0613036
ENSRNOG00000011680	Il16	1:145781928-145870912	4.61214	8.5978	-0.981998	0.00158003	0.0613036
ENSRNOG00000011044	Clmn	6:128473570-128567198	3.11772	1.53219	1.01912	0.00160828	0.0623156
ENSRNOG00000020425	Stim1	1:167373678-167533420	9.60169	15.3411	-0.69912	0.00163433	0.0632395
ENSRNOG00000014844	Kif21a	7:132071116-132143470	6.60536	4.7305	0.90699	0.00164129	0.0634234
ENSRNOG00000003067	Npffr2	14:20148913-20193083	0.0327473	0	9.3538	0.00164878	0.0636276
ENSRNOG00000052499	Rab27a	8:79722334-79776221	9.61265	18.6827	-0.946494	0.00165767	0.0638849
ENSRNOG00000013598	Melk	5:59783890-59844356	2.70722	4.85216	-0.836761	0.001664	0.0639572
ENSRNOG00000001752	Nrros	11:71872830-71889887	9.42321	16.9743	-0.845159	0.00167598	0.064246
ENSRNOG00000010997	Ednrb	15:88006977-88036354	5.0325	2.48184	1.02423	0.00169233	0.0647863
ENSRNOG00000003553	Efemp1	14:113202419-113295014	3.07327	1.49244	1.04361	0.00169968	0.0649214
ENSRNOG00000014476	Evl	6:132510757-132590241	11.8317	19.004	-0.678032	0.00170038	0.0649214
ENSRNOG00000027145	Rora	8:75516904-75607212	7.2217	3.9965	0.849159	0.00171675	0.0654597
ENSRNOG00000017804	Septin1	1:198658745-198662610	2.64771	9.22745	-1.78922	0.00171929	0.0654696
ENSRNOG00000018577	Neil1	8:61817258-61823102	1.97655	7.55938	-1.91333	0.00172505	0.0656023
ENSRNOG00000058006	Sncg	16:10722106-10726707	26.0061	10.7382	1.28957	0.00174003	0.0660845
ENSRNOG00000018350	Shtn1	1:280130504-280233929	4.44152	2.44972	0.819947	0.00174599	0.0662231
ENSRNOG00000018937	Gstm7	2:210720704-210782856	22.1242	11.3679	0.945396	0.00174837	0.0662263
ENSRNOG00000007951	Galnt14	6:24770317-24985716	0.596684	0.21048	1.50277	0.00175838	0.0664397
ENSRNOG00000031716	LOC100910978	17:15533972-15566332	4.93665	2.40682	1.03105	0.00175863	0.0664397
ENSRNOG00000004165	Prkd1	6:71035332-71349249	3.44374	2.04833	0.727116	0.00178112	0.0670252
ENSRNOG00000000699	Selplg	12:48566663-48580000	9.83419	21.1023	-1.15381	0.00178926	0.0671943
ENSRNOG00000037524	Adam6a	6:138432550-138435035	0	0.148318	-7.43302	0.0017977	0.0672967
ENSRNOG00000001162	Tff2	20:9872680-9876008	0.106065	0	7.38506	0.00182977	0.0683192
ENSRNOG00000011705	Stmn2	2:95424251-95472115	0	0.0261413	-9.17364	0.0018398	0.0686049
ENSRNOG00000006565	Fstl4	10:38104558-38532196	0.736544	0.391969	0.894629	0.00189321	0.0700166
ENSRNOG00000062232	Mcc	1:12006660-12128845	1.10282	0.350194	1.6787	0.00192206	0.070845
ENSRNOG00000007906	Bub1b	3:110367939-110420458	9.75059	16.2305	-0.726549	0.00193061	0.071069
ENSRNOG00000004208	Crim1	6:788548-960703	27.2888	16.1291	0.755426	0.00195044	0.0716156
ENSRNOG00000046494	LOC100361018	20:29928145-30088608	2.92386	1.62564	-1.26102	0.00195687	0.0717604
ENSRNOG00000002327	Gabrb1	14:38643385-39112600	0	0.00913733	-10.9409	0.00196111	0.0718042
ENSRNOG00000050661	Zfp647	7:117974278-117978787	0.258001	0	9.08269	0.00196306	0.0718042
ENSRNOG00000032329	AABR07029269.1	10:19181517-19467625	0.354008	1.13129	-1.81618	0.00198604	0.0725105
ENSRNOG00000019620	Pmf1	2:187751776-187771865	11.6121	20.9675	-0.81347	0.00201629	0.0733778
ENSRNOG00000001342	Wdr66	12:38709595-38805121	2.34561	4.40132	-0.887911	0.00203106	0.0738143
ENSRNOG00000034240	Bcor	X:11648989-11691099	7.95706	13.3176	-0.739889	0.00203342	0.0738143
ENSRNOG00000001528	Gap43	11:58624198-58717914	1.75028	0.842686	1.05087	0.00203953	0.0739427
ENSRNOG00000014879	Ttc7a	6:10912383-11014278	11.4709	18.6085	-0.69378	0.00204246	0.0739555
ENSRNOG00000020585	Tbxa2r	7:11253180-11257977	1.17225	4.61202	-1.97232	0.0020509	0.0741677
ENSRNOG00000006418	Samhd1	3:153207562-153250665	6.80475	13.7412	-1.1019	0.00213988	0.0767102
ENSRNOG00000053457	Rnase3	15:28240731-28241198	0.689512	8.27623	-3.5343	0.00217434	0.0778483
ENSRNOG00000025515	Ear1	15:28260411-28260866	0.526608	7.0532	-3.64144	0.00218677	0.0781302
ENSRNOG00000001173	Cabp1	12:47179664-47210018	0.17999	1.88064	-2.88627	0.00218764	0.0781302
ENSRNOG00000053086	Selenop	2:53105399-53116245	145.417	92.0237	0.659508	0.00221961	0.0788335
ENSRNOG00000022937	Bpifc	7:23854846-23911953	0.0206807	0	9.08439	0.00222379	0.0788335
ENSRNOG00000016999	Grp	18:61563053-61576818	0	0.080854	-9.0094	0.00223678	0.0791963
ENSRNOG00000005370	S1pr4	7:11077411-11079687	1.98477	8.73586	-2.12932	0.00225909	0.0798728
ENSRNOG00000002382	Mfap4	10:47765432-47768483	0	1.64175	-10.7602	0.0022731	0.0801861
ENSRNOG00000045646	LOC102549173	17:43633675-43634085	674.776	1210.48	-0.830749	0.00228423	0.0803813
ENSRNOG00000048696	AABR07065792.2	6:141472292-141472746	0.0285127	2.36661	-5.83031	0.00229225	0.0805442
ENSRNOG00000006697	Pip4p2	5:28395296-28442924	11.4809	6.94128	0.725798	0.00231499	0.0811657
ENSRNOG00000021802	Isg15	5:173624310-173626248	5.04355	0.357022	3.76831	0.00232222	0.0813201
ENSRNOG00000037928	AABR07021930.1	13:99335020-99346543	0.0320247	0	7.45376	0.00232532	0.0813295
ENSRNOG00000009054	Elmod1	8:58486078-58542844	0	0.0203947	-9.0571	0.00234754	0.0819455
ENSRNOG00000005063	Atl1	6:92229686-92370421	1.15895	0.587932	0.979491	0.00235591	0.0819455
ENSRNOG00000010094	Kcnmb2	2:118546829-118586699	0	0.0268973	-8.95864	0.00236779	0.0821157
ENSRNOG00000055169	AABR07065813.1	6:142299568-142299996	0	0.844267	-7.41508	0.00237822	0.082378
ENSRNOG00000047014	Homer1	2:22909569-23009678	3.89562	2.08049	0.853482	0.0023841	0.0824824
ENSRNOG00000003666	Jchain	14:21177237-21183542	18.2414	79.8297	-2.08137	0.00240768	0.0829984
ENSRNOG00000046050	Dennd1c	9:9970209-9982810	1.52286	4.81377	-1.67969	0.00241938	0.083302
ENSRNOG00000007025	Evc2	14:78129749-78211931	2.88889	1.54253	1.00569	0.00244956	0.0842225
ENSRNOG00000005214	Plek	14:100151210-100259417	8.13307	13.2773	-0.712885	0.0024554	0.0842396
ENSRNOG00000008713	Slc41a2	7:26522314-26607861	7.172	4.30697	0.7384	0.00246358	0.0844194
ENSRNOG00000012563	Arhgap29	2:225552111-225613359	9.64231	5.713	0.790272	0.0024787	0.0848365
ENSRNOG00000052564	Gpx3	10:40247436-40255422	368.721	218.535	0.764807	0.00248931	0.0850982
ENSRNOG00000012471	Thbs4	2:22343727-22385855	35.9794	20.724	0.795641	0.00249338	0.0851361
ENSRNOG00000017181	Malt1	18:61109069-61162445	1.94416	3.78751	-0.966017	0.0024994	0.0851519
ENSRNOG00000020300	Lsp1	1:215628785-215662504	26.9913	42.5121	-0.654087	0.00250419	0.0852017
ENSRNOG00000010665	Ccr7	10:87057136-87067456	0.0716963	0.570074	-2.97967	0.00251375	0.0852246
ENSRNOG00000012208	Itgb7	7:143820900-143837780	3.6102	7.94932	-1.1406	0.00254821	0.0861893
ENSRNOG00000047464	AABR07060886.1	4:98481520-98542683	0.428723	2.02233	-2.19462	0.00255629	0.0863293
ENSRNOG00000055889	AABR07030901.1	10:108387789-108393442	0.0545563	0	7.19401	0.00255835	0.0863293
ENSRNOG00000016712	Lhcgr	6:12493943-12554439	0	0.0165783	-8.86596	0.00258151	0.0869744
ENSRNOG00000034230	Fcrl1	2:186555632-186724424	0.13772	0.779444	-2.33501	0.00259421	0.0872323
ENSRNOG00000042975	Tmem45a	11:46009322-46093973	17.5597	10.1088	0.735958	0.00262301	0.0880976
ENSRNOG00000006327	Rcc2	5:159220979-159234320	42.2666	68.1685	-0.684866	0.00264386	0.0886944
ENSRNOG00000016689	Fanci	1:141120166-141172483	4.70686	7.90554	-0.742332	0.0026976	0.0902863
ENSRNOG00000028832	Sorcs3	1:268189277-268620331	0.793226	0.326801	1.27499	0.00270497	0.0904276
ENSRNOG00000017980	Itgal	1:198744050-198781750	6.78679	11.6905	-0.784566	0.00271408	0.0905451
ENSRNOG00000024210	Nlrc3	10:11810926-11842482	0.279371	0.91504	-1.80117	0.00271478	0.0905451
ENSRNOG00000004198	Stxbp6	6:65089318-65319527	5.08542	3.03683	0.737622	0.00271904	0.090582
ENSRNOG00000053025	AC130391.3	17:43678227-43689286	32.9758	55.6946	-0.746895	0.00272648	0.0906202
ENSRNOG00000002167	Dmp1	14:6889856-6900733	142.699	87.7797	0.69752	0.00272649	0.0906202
ENSRNOG00000016678	Angptl2	3:12262822-12292663	58.1298	35.7986	0.699825	0.00274631	0.090805
ENSRNOG00000017030	Arid1b	1:45880958-46234874	16.925	32.5887	-0.691705	0.00279	0.0918813
ENSRNOG00000057092	Slfn4	10:70411738-70435156	15.0959	3.26734	2.10406	0.00279423	0.0919153
XLOC_087621	XLOC_087621	3:19552817-19553681	0	0.534773	-7.74386	0.0028038	0.0921247
ENSRNOG00000016291	Marveld3	19:41710102-41724923	0.0365407	0	7.33661	0.00281031	0.0922334
ENSRNOG00000007350	Rac2	7:119783849-119797098	54.0758	99.5995	-0.868346	0.002822	0.0925114
ENSRNOG00000001739	Meltf	11:72135668-72157522	21.4623	10.9435	0.971379	0.00283564	0.0928526
ENSRNOG00000033933	Stfa3	11:67308943-67314172	0	0.181291	-8.77574	0.00284198	0.0928561
ENSRNOG00000018559	Tex44	9:93436896-93512782	0	1.01383	-8.76581	0.00288599	0.0940089
ENSRNOG00000033815	AC142181.1	4:70572942-70821816	0.135586	0.849522	-1.77053	0.00289057	0.0940089
ENSRNOG00000008336	Tnfrsf11b	7:93798545-93826665	10.1914	5.80885	0.81157	0.0029016	0.0942589
ENSRNOG00000015082	Nlrp10	1:173520413-173528943	0.00637633	0.209803	-4.93035	0.00290481	0.0942589
ENSRNOG00000005278	Trhde	7:57253023-57679795	0.110677	0.334687	-1.23692	0.00291822	0.0945872
ENSRNOG00000010253	Cd163	4:156752082-156785467	16.5863	9.70014	0.798068	0.00297107	0.0958677
ENSRNOG00000025742	Lmnb2	7:11660934-11675472	6.07541	11.9028	-0.964148	0.00297785	0.095979
ENSRNOG00000019681	Pold1	1:100537900-100554488	7.20372	13.078	-0.856044	0.00300411	0.0964773
ENSRNOG00000006831	Pgr	8:7128656-7187796	0.104808	0.528676	-2.34344	0.00300689	0.0964773
ENSRNOG00000002146	Pkd2	14:6602004-6645257	11.5073	6.99957	0.715024	0.00301009	0.0964773
ENSRNOG00000008941	Ets1	8:33816386-33879625	20.3949	32.6725	-0.678142	0.00306349	0.0978616
ENSRNOG00000021553	Nckap5	13:42265806-42885440	1.53926	0.810073	0.924457	0.0030712	0.0979469
ENSRNOG00000055843	Zik1	1:63286802-63293635	0.473088	0	10.6045	0.00307298	0.0979469
ENSRNOG00000013177	Map3k1	2:43329516-43393207	5.15376	8.55768	-0.729307	0.00310385	0.0988212
ENSRNOG00000011016	Slc7a2	16:54460067-54513349	13.6947	8.31994	0.716753	0.00311434	0.0990457
ENSRNOG00000029792	NEWGENE_1308171	17:14607442-14627937	15.8123	8.92961	0.821159	0.00311993	0.0991139
ENSRNOG00000023457	Stpg2	2:244521699-245044918	0	0.00597567	-10.4963	0.00313729	0.0995553
ENSRNOG00000001167	Ubash3a	20:9948908-9985133	2.03882	3.9982	-0.968045	0.0031426	0.0996138
ENSRNOG00000000187	Csf2rb	7:119554354-119568776	4.75733	10.4733	-1.12777	0.003149	0.0996562
ENSRNOG00000019093	Nrg2	18:28835417-29015552	0.304138	0.689024	-1.16385	0.00315515	0.0996818
ENSRNOG00000049939	AABR07066677.1	9:12311282-12351480	0.249382	0	8.76016	0.00317269	0.100126
ENSRNOG00000003328	Cdip1	10:10967658-10989936	9.41672	17.8955	-1.02629	0.00320952	0.101066
ENSRNOG00000006167	Rasal3	7:14403592-14418950	1.6007	4.02629	-1.32762	0.00321944	0.101268
ENSRNOG00000050792	Tnfaip6	3:37545238-37564699	3.79037	1.65164	1.2025	0.00325794	0.102367
ENSRNOG00000007077	Fem1b	8:67694904-67708304	22.8078	37.1362	-0.701828	0.00328729	0.103176
ENSRNOG00000019383	Tef	7:123034034-123058604	11.3119	5.2642	1.10681	0.00333406	0.104416
ENSRNOG00000017105	Dpyd	2:221823687-222694627	0.83192	0.478351	0.888636	0.00334593	0.104674
ENSRNOG00000033693	Naip2	2:30376419-30458542	0.732311	1.5857	-1.11237	0.00335181	0.104744
ENSRNOG00000006333	AABR07065789.1	6:141198248-141321332	0.145108	4.60876	-4.96784	0.00336487	0.104924
ENSRNOG00000046151	Tubb1	3:172550258-172558114	3.68254	9.46301	-1.35783	0.00341205	0.10628
ENSRNOG00000007925	Pak6	3:110442637-110487526	0.187161	0.662937	-1.92459	0.00346682	0.107869
ENSRNOG00000030418	Tmem47	X:48779110-48805644	8.35052	4.30459	0.953866	0.00351872	0.10913
ENSRNOG00000028077	Cfap44	11:61162628-61234944	0.046131	0.221142	-2.25278	0.00356359	0.110283
ENSRNOG00000004150	Slc9a7	X:2364809-2614770	1.04751	3.52447	-1.74607	0.00358418	0.110801
ENSRNOG00000007970	Plxnc1	7:35850398-36000906	1.91042	3.31271	-0.790025	0.00359478	0.11101
ENSRNOG00000037982	Tmem236	17:81274513-81344836	0.156568	0.576324	-2.64095	0.0036132	0.11122
ENSRNOG00000001424	Cux1	12:23150956-23445074	9.78115	15.3655	-0.679584	0.00362298	0.111402
ENSRNOG00000050386	Pfn4	6:30027915-30038000	0	0.0294367	-6.99608	0.00366315	0.112277
ENSRNOG00000031855	Actr3b	4:5644260-5672708	1.26181	2.79407	-1.14781	0.00367844	0.112625
ENSRNOG00000011133	Trpc4	2:143475323-143604972	0.018529	0.149265	-3.01917	0.00370656	0.113071
ENSRNOG00000048722	LOC103690365	4:170092537-170117325	0.00690533	7.81044	-8.88676	0.00370872	0.113071
ENSRNOG00000018778	Cadm1	8:52127399-52189722	16.4221	10.477	0.647344	0.00373428	0.113729
ENSRNOG00000015071	Zim1	1:70253650-70266809	30.9527	15.9417	0.931899	0.00378649	0.115197
ENSRNOG00000004077	Kcnc2	7:54980120-55159351	0.082903	0.015293	2.42115	0.00379675	0.115266
ENSRNOG00000007057	Csmd2	5:146383942-146739418	0.144395	0.054382	1.41624	0.00381463	0.115657
ENSRNOG00000060202	LOC108348110	4:162672073-162680757	0.095185	0	8.58868	0.0038177	0.115657
ENSRNOG00000012342	Ttc29	19:33206026-33424972	0	0.012556	-10.3119	0.00383418	0.115912
ENSRNOG00000005964	Nr4a3	5:63781801-63821637	1.12254	0.342851	1.70446	0.00389574	0.11765
ENSRNOG00000001138	Taok3	12:45037883-45182974	8.79856	13.7705	-0.638302	0.00391923	0.117987
ENSRNOG00000026705	Dgki	4:64374342-64831473	4.00986	2.46262	0.698063	0.0039444	0.118373
ENSRNOG00000000316	Sobp	20:47750762-47910375	13.5177	8.22897	0.713404	0.00397185	0.118733
ENSRNOG00000002926	Uap1	13:88463532-88497901	18.8184	11.974	0.651866	0.00397285	0.118733
ENSRNOG00000059890	Clec2d2	4:162303516-162494575	0.886269	2.85014	-1.75365	0.00397291	0.118733
ENSRNOG00000004482	Ccdc88c	6:124905808-125027553	4.59465	7.27704	-0.659862	0.00398252	0.118897
ENSRNOG00000000239	Ccl7	10:69423086-69424979	2.3138	0.296115	2.94511	0.00402319	0.119862
ENSRNOG00000008943	Penk	5:17056419-17061837	29.4975	13.3815	1.14495	0.00405273	0.120617
ENSRNOG00000013836	Arhgap17	1:193239040-193328371	11.1171	17.4486	-0.64171	0.00406026	0.120716
ENSRNOG00000042369	RGD1564614	13:56889669-56958561	0	0.012053	-8.48146	0.00408674	0.121203
ENSRNOG00000045973	Gzmb	15:36327721-36472346	0.045704	0	10.3521	0.00408928	0.121203
ENSRNOG00000017428	Map1b	2:29675391-29768750	6.51049	3.95904	0.716242	0.00411773	0.121714
ENSRNOG00000029141	Trabd2b	5:133221139-133420644	9.86283	5.78823	0.765547	0.00411922	0.121714
ENSRNOG00000003746	Gjb1	X:71272042-71279977	0.035881	0	6.9783	0.00416212	0.122729
ENSRNOG00000056658	Xylt1	1:187149453-187261632	83.8025	51.2075	0.708501	0.00417524	0.122864
ENSRNOG00000008133	Mfng	7:119978983-119996824	6.00035	11.0313	-0.875458	0.00419655	0.123365
ENSRNOG00000024825	Fam163a	13:73741679-73819896	0.661001	0.250383	1.39439	0.0042047	0.123478
ENSRNOG00000021796	RGD1565166	10:10555337-10564433	0	0.0313167	-7.08931	0.00422569	0.123968
ENSRNOG00000002248	Fryl	14:37551940-37756149	18.8157	30.0096	-0.666405	0.00424863	0.124514
ENSRNOG00000028930	Dab2	2:55747318-55768270	46.1344	29.7916	0.629376	0.00427034	0.124873
ENSRNOG00000013213	Epha4	9:83111222-83253458	3.88638	2.43284	0.673631	0.00427393	0.124873
ENSRNOG00000023679	Prdm5	4:96659084-96812263	9.13467	5.86195	0.640801	0.00428047	0.124937
ENSRNOG00000002024	Epha5	14:25589762-25958227	0.585434	0.3141	1.10543	0.00431745	0.125889
ENSRNOG00000058545	Arhgap4	X:156873849-156888761	3.15065	6.85998	-1.11695	0.00432246	0.125907
ENSRNOG00000018082	Slc26a2	18:56520740-56534415	23.0304	13.7367	0.74559	0.00433252	0.12593
ENSRNOG00000046452	Fcgr2b	13:89327794-89433815	1.39622	2.96799	-1.03315	0.00433278	0.12593
ENSRNOG00000009347	Arhgap25	4:119249682-119327822	3.31888	5.8203	-0.800964	0.00433638	0.12593
ENSRNOG00000008837	Ass1	3:10327414-10375826	7.65378	16.3188	-1.1133	0.00435463	0.126333
ENSRNOG00000001807	Sspn	4:180291389-180324408	10.2678	6.08247	0.753447	0.00436689	0.126433
ENSRNOG00000007439	Unc13d	10:104613928-104628676	2.99817	6.65405	-1.16943	0.00437614	0.12644
ENSRNOG00000004398	Pkhd1l1	7:83373022-83545540	6.46996	4.15952	0.63426	0.00442365	0.12718
ENSRNOG00000053081	LOC102548682	2:198390166-198390576	941.854	1578.99	-0.738894	0.00443374	0.127216
ENSRNOG00000013838	Hcrtr1	5:148346031-148355406	0.0269863	0	6.90036	0.0044989	0.128957
ENSRNOG00000015658	Sorbs1	1:259376933-259484569	13.257	8.03668	0.651411	0.00452319	0.129519
ENSRNOG00000034013	Acaca	10:71502775-71719910	23.3587	15.1425	0.624076	0.00458889	0.130884
ENSRNOG00000051615	Hmgn2	5:152195361-152198813	114.994	208.415	-0.842134	0.0046013	0.130978
ENSRNOG00000017975	Dnajb13	1:165506334-165530095	17.8271	30.372	-0.761795	0.00461246	0.131165
ENSRNOG00000031930	Bin2	7:142273833-142300382	7.61421	13.6149	-0.827968	0.00465621	0.132279
ENSRNOG00000010903	Crb1	13:56270781-56462834	0.081033	0.0191633	2.07859	0.00468756	0.132907
ENSRNOG00000015674	Acap1	10:56492300-56506446	4.47794	9.72591	-1.10476	0.00471457	0.133409
ENSRNOG00000014276	Plce1	1:257157264-257466064	3.14855	1.88664	0.660146	0.00478748	0.135074
ENSRNOG00000017488	Snx24	18:48201728-48355699	6.51745	4.18588	0.63841	0.00480308	0.135251
ENSRNOG00000015994	Cd3d	8:49282460-49287110	0.0825507	0.829317	-3.26026	0.00480467	0.135251
ENSRNOG00000053450	Myadm	1:64438472-64446818	83.4402	53.8647	0.631771	0.00480788	0.135251
ENSRNOG00000037190	Cd101	2:203374841-203413125	1.68077	4.99534	-1.59741	0.00485564	0.136328
ENSRNOG00000009465	Sfrp2	2:182723854-182731764	3.24599	8.17407	-1.33772	0.00490843	0.137541
ENSRNOG00000047915	AABR07051550.1	3:16817051-16817657	0.192754	4.74997	-4.45969	0.00494245	0.13836
ENSRNOG00000016575	Tnfrsf1b	5:163136390-163167299	7.72586	12.8153	-0.732175	0.00497901	0.138753
ENSRNOG00000003869	Sod3	14:60958592-60964324	23.272	11.9743	0.955608	0.00498065	0.138753
ENSRNOG00000056330	Cnbd1	5:32629466-32956159	0	0.00678733	-9.9919	0.00500308	0.13892
ENSRNOG00000033064	Edil3	2:17616096-18128512	31.0575	18.7532	0.743363	0.00501562	0.13892
ENSRNOG00000024521	Spata16	2:112281376-112659927	0	0.00632867	-10.103	0.00503286	0.139108
ENSRNOG00000030515	Nfasc	13:49335408-49522415	0.997429	0.465761	1.08555	0.00504342	0.139108
ENSRNOG00000004160	Prps2	X:28435507-28472880	5.44044	8.96882	-0.716956	0.00504345	0.139108
ENSRNOG00000014135	Rab11fip4	10:66942398-67048308	8.81831	5.18076	0.761049	0.00505436	0.139108
ENSRNOG00000006622	Cry1	7:24534615-24634097	4.18525	6.55002	-0.645295	0.0050567	0.139108
ENSRNOG00000013237	AABR07027925.1	17:49322205-49469557	0	0.015807	-10.0432	0.00506108	0.139108
ENSRNOG00000052015	AABR07042937.1	19:14951616-14953755	0	1.06706	-10.0432	0.0050611	0.139108
ENSRNOG00000033338	Gimap6	4:78336423-78342863	3.49009	8.65568	-1.30962	0.00510211	0.139928
ENSRNOG00000015733	Myl12b	9:119307176-119321500	38.9772	60.7214	-0.636396	0.00510912	0.139928
ENSRNOG00000042609	Spag16	9:77320726-77833281	0.00488267	0	10.1372	0.0051326	0.140402
ENSRNOG00000004588	Zbed4	7:129749305-129801123	6.39087	12.1365	-0.886061	0.00514488	0.140604
ENSRNOG00000008153	Crtam	8:45153308-45215974	0	0.0359813	-10.0237	0.00517943	0.141249
ENSRNOG00000059997	Brip1	10:73507100-73629581	1.96234	3.29919	-0.747434	0.00518392	0.141249
ENSRNOG00000012655	Adamts6	2:34334725-34586755	5.79664	2.73366	1.09664	0.00518814	0.141249
ENSRNOG00000010977	Igfbp6	7:143749221-143754054	34.4101	16.7252	1.03954	0.00522271	0.142056
ENSRNOG00000007654	Lrig3	7:69213147-69263142	9.17828	5.64098	0.699397	0.005231	0.14212
ENSRNOG00000017987	Ucma	17:77252100-77261731	335.463	187.207	0.842029	0.00523541	0.14212
ENSRNOG00000056826	Arap2	14:48726045-48922983	2.02923	3.87578	-1.0587	0.00524917	0.14212
ENSRNOG00000060184	AABR07065808.1	6:141957036-141957537	0	0.48008	-6.83264	0.00527666	0.142499
ENSRNOG00000022071	Itga2b	10:90398132-90415070	3.42155	7.36493	-1.09772	0.00527867	0.142499
ENSRNOG00000049866	Plcxd1	12:52641222-52676608	0	0.0217973	-8.29843	0.00529199	0.142725
ENSRNOG00000002350	Eaf2	11:66878658-66923092	0.049576	0.568116	-3.48799	0.00535041	0.143761
ENSRNOG00000004089	Enpp2	7:94480396-94563001	13.3793	8.72866	0.617302	0.00536861	0.143981
ENSRNOG00000005209	Spred1	3:108795235-108857556	25.894	16.5293	0.643769	0.00538929	0.144266
ENSRNOG00000021161	Fermt3	1:222254184-222272285	21.0613	34.8025	-0.715979	0.00542719	0.145146
ENSRNOG00000033538	Defb40	16:75702347-75705489	0	0.213949	-8.29096	0.00545781	0.145694
ENSRNOG00000037393	Wdr88	1:91488066-91526570	0	0.0174007	-8.27808	0.00549152	0.146437
ENSRNOG00000050478	LOC102548682	17:43626128-43626538	1267.81	2153.24	-0.750137	0.00549583	0.146437
ENSRNOG00000004131	Pkn1	19:24803524-24831500	13.021	20.6795	-0.666201	0.00553842	0.147364
XLOC_027526	XLOC_027526	11:85445279-85469795	0.0348117	1.12497	-4.72647	0.00554108	0.147364
ENSRNOG00000005371	Klhl29	6:29178858-29483460	2.9109	1.5279	0.950076	0.00554602	0.147364
ENSRNOG00000008232	Spaca1	5:49424061-49439358	0	0.0465457	-8.36814	0.0055602	0.147604
ENSRNOG00000051854	Enpep	2:233667254-233743866	9.59958	6.26265	0.617952	0.00557289	0.147805
ENSRNOG00000002930	Ppl	10:10644572-10690223	1.93548	0.885215	1.12099	0.00562127	0.148814
ENSRNOG00000000824	Dse	20:27703732-27782841	11.4032	7.41215	0.617682	0.00563606	0.148853
ENSRNOG00000033215	RT1-Db1	20:4087618-4097190	1.18027	4.62316	-2.03171	0.00563829	0.148853
ENSRNOG00000045684	LOC100910978	17:14696308-14717420	0.103049	0	10.0341	0.00564746	0.148958
ENSRNOG00000006331	Elovl5	8:85259982-85285983	28.9751	44.9772	-0.631956	0.00568391	0.149782
ENSRNOG00000020884	Cd6	1:226848403-226887156	0.0716383	0.438564	-2.44595	0.00571608	0.15032
ENSRNOG00000037839	P2ry10	X:78196300-78210403	0.272147	1.167	-2.11798	0.00572	0.15032
ENSRNOG00000009722	Chd3	10:55943446-55965216	13.4542	21.4265	-0.673439	0.00575032	0.150704
ENSRNOG00000011763	Serp1	2:148718280-148755515	72.78	32.6385	1.13459	0.00576296	0.150897
ENSRNOG00000010588	Tns2	7:143707237-143720595	33.3014	20.6801	0.686489	0.00577182	0.150992
ENSRNOG00000004057	Ccdc88a	14:113867209-113932263	12.0522	6.16771	0.955931	0.00586794	0.153364
XLOC_079710	XLOC_079710	2:145422390-145513228	2.82949	1.56934	0.845433	0.00587617	0.153364
ENSRNOG00000024461	Marchf11	2:78825074-78926395	0	0.019408	-9.81931	0.00588636	0.153364
ENSRNOG00000016617	Wwtr1	2:147577089-147693082	33.6661	21.897	0.618202	0.00589154	0.153364
ENSRNOG00000013694	Ntng2	3:7742471-7796385	4.62892	8.42502	-0.829309	0.00591911	0.153865
ENSRNOG00000008475	Fut9	5:40032855-40237591	0.011004	0	9.98644	0.0059552	0.154663
ENSRNOG00000007628	Ptp4a3	7:114997103-115002902	12.1143	24.9758	-1.0333	0.00597241	0.154754
ENSRNOG00000001414	Serpine1	12:22641104-22651482	11.4918	6.05735	0.926912	0.00598142	0.154754
ENSRNOG00000025209	Plxnd1	4:147854309-147893992	27.7079	42.2369	-0.608111	0.00598188	0.154754
ENSRNOG00000032922	Dclk1	2:144646308-144936927	7.32333	4.89935	0.639731	0.00598513	0.154754
ENSRNOG00000001427	Orai2	12:23544287-23564569	2.88223	7.42826	-1.38379	0.00598562	0.154754
ENSRNOG00000016967	Hfe	17:43617247-43807557	979.434	1810.4	-0.815769	0.00603922	0.155973
ENSRNOG00000020369	Igf2	1:215828102-215846911	526.387	321.178	0.713717	0.00607017	0.156267
ENSRNOG00000050152	Chsy3	18:54222970-54496585	7.9039	4.79978	0.917348	0.00607133	0.156267
ENSRNOG00000011474	Ppp1r3b	16:60415229-60427474	16.4864	8.74671	0.943979	0.00608584	0.156361
ENSRNOG00000009795	Nfib	5:100439082-100647727	22.471	14.083	0.670076	0.00610033	0.156593
ENSRNOG00000003614	Mgat5	13:43764988-44157924	8.41734	15.0344	-0.830494	0.00612271	0.156821
ENSRNOG00000013312	Kcnt2	13:57130936-57521836	1.04565	0.554482	1.03088	0.00614772	0.156969
ENSRNOG00000043093	Ap1m2	8:22319331-22336794	0	0.0389723	-8.30969	0.00616102	0.157169
ENSRNOG00000009291	Dnase1l3	15:18710492-18736473	4.18377	7.95607	-0.929106	0.00616887	0.15723
ENSRNOG00000054011	Tbc1d8b	X:110894845-110983309	9.57392	5.90568	0.693042	0.00618939	0.157613
ENSRNOG00000009205	Lmo4	2:250218641-250241775	16.4664	33.6054	-1.09997	0.00623497	0.158604
ENSRNOG00000028774	Vgll3	11:3119885-3164751	1.35176	0.557071	1.27315	0.00623934	0.158604
ENSRNOG00000053334	Stmn4	15:43007908-43025852	1.14778	0.344986	1.76131	0.00631175	0.16002
ENSRNOG00000005093	Lgr6	13:51815215-51930972	2.60791	1.36775	0.921143	0.00634147	0.160491
ENSRNOG00000042449	Cdc42se2	10:40054400-40122915	11.0068	16.9952	-0.623948	0.00640317	0.16191
ENSRNOG00000013862	Dusp2	3:119776925-119779099	1.39201	5.92738	-2.08238	0.00642157	0.162082
ENSRNOG00000005825	Lyz2	7:60335969-60341264	364.978	661.704	-0.852316	0.00642692	0.162082
ENSRNOG00000014530	Nav2	1:104576589-104941552	3.07192	5.06972	-0.728654	0.00643427	0.162125
ENSRNOG00000012862	Spsb4	8:104840940-104912959	3.52441	2.0047	0.80705	0.00646214	0.162583
ENSRNOG00000023238	Dgkd	9:94980409-95069714	12.259	18.6327	-0.606056	0.00647094	0.162583
ENSRNOG00000057173	Lipn	1:252375933-252396460	0.0314113	0	8.26996	0.00647582	0.162583
ENSRNOG00000059734	AABR07043564.1	19:29241159-29373989	0.0162447	0	9.92666	0.00648139	0.162583
ENSRNOG00000032728	LOC689230	11:67329657-67337948	0.163493	1.23932	-2.90781	0.00648453	0.162583
ENSRNOG00000052469	Bmpr1a	16:10758527-10802512	18.55	11.9126	0.637995	0.00651818	0.163238
ENSRNOG00000005854	Angpt1	7:81342280-81592206	10.1037	5.90058	0.770879	0.00652418	0.163246
ENSRNOG00000018954	Tsnaxip1	19:37795658-37813424	0.012832	0.134083	-3.31955	0.00653084	0.163271
ENSRNOG00000008444	Cbl	8:48489036-48564722	13.3962	20.452	-0.605529	0.00654315	0.163437
ENSRNOG00000007437	Irf5	4:56805132-56897775	5.34787	9.58346	-0.848225	0.00656491	0.163531
ENSRNOG00000011400	Ralyl	2:89041591-89310946	0.00728067	0	9.88695	0.00656969	0.163531
ENSRNOG00000016278	Ccl17	19:10619032-10620671	0.024256	0.910563	-5.13883	0.00663929	0.164983
ENSRNOG00000000454	RT1-DOb	20:4020317-4026677	0.0671393	0.784459	-3.22406	0.00665201	0.164983
ENSRNOG00000047459	H1f4	17:43734461-43735120	648.055	1102.13	-0.752545	0.00665671	0.164983
ENSRNOG00000016041	Zc3h12d	1:1938419-1972918	0.596802	1.45268	-1.28013	0.00673589	0.16674
ENSRNOG00000039859	Dnmt1	8:21922515-21968495	23.9383	36.2748	-0.602255	0.00673921	0.16674
ENSRNOG00000025672	Tex11	X:70670322-70946565	0	0.009174	-9.68612	0.00676207	0.167018
XLOC_007998	XLOC_007998	1:238208-521242	1.91196	0.796795	1.37812	0.00679355	0.167652
ENSRNOG00000031249	Slco1a2	4:176445858-176528110	0	0.00760267	-8.18071	0.00681905	0.168014
ENSRNOG00000007159	Ccl2	10:69412017-69413870	4.44545	0.593226	2.70097	0.00686064	0.168728
ENSRNOG00000021027	Dbp	1:101687855-101692846	12.4302	3.35787	1.66868	0.00689446	0.169334
ENSRNOG00000016110	Kcnk12	6:11373917-11494459	0.534058	1.38994	-1.347	0.0069149	0.169594
ENSRNOG00000006841	Ano4	7:29492016-29701721	0.0735543	0.0187957	1.95871	0.00693283	0.169778
ENSRNOG00000011374	Catsper3	17:8900036-8925503	0.122945	0.004529	4.71837	0.00695574	0.170194
ENSRNOG00000023116	Agmo	6:56846789-57193961	0.774524	0.536198	0.922548	0.00699837	0.170842
ENSRNOG00000002417	Serpinb10	13:27465930-27483799	4.25913	9.28148	-1.10702	0.00700008	0.170842
ENSRNOG00000016707	Casp2	4:71652354-71670239	11.508	18.8192	-0.69885	0.00705335	0.171749
ENSRNOG00000048411	Uhrf1	9:10738222-10757954	39.2699	62.1122	-0.650569	0.00706106	0.171749
ENSRNOG00000011420	Mtmr7	16:54765325-54856225	2.41722	1.35809	0.837797	0.00710302	0.172622
ENSRNOG00000042996	AABR07065798.1	6:141715354-141715846	0.33515	6.34282	-4.19723	0.00711676	0.17281
ENSRNOG00000030093	Defa5	16:75338052-75415555	163.219	472.416	-1.49168	0.0071349	0.173104
ENSRNOG00000018371	Tubb6	18:63130542-63140181	35.8781	22.55	0.674635	0.00715159	0.173363
ENSRNOG00000015906	Tgif1	9:119125506-119190698	7.00581	12.9191	-0.967257	0.00717391	0.173568
ENSRNOG00000004696	Arhgap5	6:73345392-73405880	12.3514	6.75457	0.863384	0.00717804	0.173568
ENSRNOG00000016366	Colec12	18:867048-1052606	43.9424	29.1099	0.593915	0.00721272	0.174257
ENSRNOG00000006569	Itgb8	6:147094097-147172813	1.65001	0.792656	1.06377	0.00723048	0.174539
ENSRNOG00000001294	Ift81	12:39420154-39506890	3.54398	2.07025	0.821114	0.00732797	0.176584
ENSRNOG00000050257	AABR07003273.1	1:103060698-103163288	0.405065	0.080244	2.64955	0.00733546	0.176584
ENSRNOG00000014605	Lig4	16:85331866-85337769	5.48958	12.4891	-1.18837	0.00734677	0.176592
ENSRNOG00000018646	Hbegf	18:29329764-29340802	8.67627	4.12105	1.06618	0.00735236	0.176592
ENSRNOG00000020647	Ctsg	15:35111091-35113678	39.8242	113.557	-1.47556	0.00740529	0.177543
ENSRNOG00000011033	Tekt2	5:144341946-144345531	0.208305	1.39988	-2.73899	0.00741051	0.177543
ENSRNOG00000047002	Fstl5	2:174542667-175233457	0.00259833	0	9.75734	0.00742713	0.177793
ENSRNOG00000002810	Gfpt2	10:35279236-35325508	29.2088	18.604	0.650289	0.00743861	0.17792
ENSRNOG00000003084	Parp1	13:98857177-98889716	23.0398	34.6992	-0.586873	0.00748148	0.178648
ENSRNOG00000003680	Gabrb2	10:27973681-28187565	0.00832333	0	9.74457	0.00753068	0.179674
ENSRNOG00000018012	Tulp4	1:47032113-47127035	12.1361	7.81584	0.630508	0.00753972	0.17974
ENSRNOG00000049804	AABR07061513.1	4:130649640-130659697	0	0.0523627	-7.94297	0.007559	0.179941
ENSRNOG00000026764	Pla2g4c	1:75428027-75620911	0.0542083	0.457846	-2.76694	0.00757929	0.180235
ENSRNOG00000026044	Prrg1	X:45698237-45806198	4.57259	2.58561	0.821811	0.00763278	0.181357
ENSRNOG00000024788	RGD1562036	5:148433086-148444188	0.0514467	0	8.03414	0.00766023	0.181859
ENSRNOG00000047783	Tmem200a	1:20331976-20412381	0.949947	0.455967	1.05687	0.00767191	0.181931
ENSRNOG00000001700	Whrn	5:79234950-79317206	1.35736	2.37153	-0.851207	0.00767589	0.181931
ENSRNOG00000033835	Dnm1	3:11338083-11382043	12.5936	8.08969	0.63361	0.00770578	0.182489
ENSRNOG00000015519	Ces1d	19:15033108-15239821	2.46162	1.12029	1.13857	0.007754	0.183329
ENSRNOG00000026855	Abhd12b	6:92568935-92596327	0	0.0607527	-9.55744	0.00778405	0.183888
ENSRNOG00000006583	Hpgds	4:95946025-95970666	5.13919	2.66786	0.947083	0.00780448	0.184219
ENSRNOG00000007395	Baat	5:64768401-64777368	0	0.0205127	-6.467	0.00781812	0.184344
ENSRNOG00000026435	Arid3a	7:12574198-12601674	4.95632	9.13984	-0.817837	0.00782262	0.184344
ENSRNOG00000046643	Cyp3a9	12:19074583-19114399	0.0159823	0	8.01999	0.00783005	0.184368
ENSRNOG00000021896	Mmp20	8:5833359-5875232	0	0.012907	-7.97558	0.0078392	0.184433
ENSRNOG00000014285	Ssh2	10:62705051-62814520	6.90247	10.3641	-0.586278	0.00784588	0.184439
ENSRNOG00000053118	LOC103694867	KL568417.1:15968-35620	0.0940917	0	9.70311	0.00787976	0.184722
ENSRNOG00000002093	Tgfbr3	14:3437290-3682545	19.2911	12.8569	0.599611	0.00788338	0.184722
ENSRNOG00000057556	Pdzrn3	4:133717139-133951264	10.2231	6.78572	0.591269	0.00789385	0.18473
ENSRNOG00000022943	Dgka	7:3143827-3170146	5.28376	8.9273	-0.755134	0.00790337	0.184733
ENSRNOG00000033017	LOC100910669	12:21678571-21690678	0.732874	0.0625683	3.57098	0.00795238	0.185728
ENSRNOG00000019689	Vwf	4:158088505-158219523	5.80804	9.44632	-0.698338	0.00803274	0.186997
ENSRNOG00000045636	Fasn	10:109987735-110005901	60.5595	39.5944	0.608704	0.00804984	0.187217
ENSRNOG00000004540	Clec3b	8:132241134-132246694	45.0334	26.9026	0.749387	0.00805777	0.187217
ENSRNOG00000059507	Lamc3	3:9267122-9326993	1.1281	0.477458	1.2584	0.00806986	0.187217
ENSRNOG00000048458	AABR07065705.1	6:139636594-139637354	0	0.343606	-6.81442	0.00807474	0.187217
ENSRNOG00000042962	Pdss2	20:47966583-48192743	5.19546	6.64517	-1.06175	0.00811369	0.187968
ENSRNOG00000011879	Nfat5	19:38446059-38533735	20.2683	12.9941	0.636364	0.00814022	0.188279
ENSRNOG00000033528	Tll1	16:27399467-27597240	1.76636	0.997499	0.813669	0.00814872	0.188324
ENSRNOG00000018584	LOC100359583	9:93545396-93549436	395.169	605.888	-0.611371	0.00822975	0.189943
ENSRNOG00000024435	Galnt17	12:28381982-29268073	5.71427	2.75407	0.678608	0.00823196	0.189943
ENSRNOG00000019565	Tbx15	2:201289357-201390745	9.88629	6.02466	0.77612	0.0082407	0.189992
ENSRNOG00000038427	AABR07015812.1	14:78359682-78377825	0	0.0298577	-7.97039	0.00830289	0.191119
ENSRNOG00000049649	Hist1h2ah	17:43632397-43632789	1007.67	1655.23	-0.702694	0.00832074	0.191377
ENSRNOG00000013564	Dok3	17:9639330-9644090	8.83453	18.9781	-1.0947	0.00834975	0.191738
ENSRNOG00000061527	Gck	14:86148928-86190659	0	0.0136937	-7.91785	0.0083603	0.191745
ENSRNOG00000050295	Rnase17	15:28204224-28204691	0.474755	4.43057	-3.16956	0.0083701	0.191745
ENSRNOG00000005291	Slc38a1	7:137975549-138039984	11.4381	17.3094	-0.59754	0.00839022	0.191916
ENSRNOG00000034025	Ptprj	3:79233525-79390956	11.6512	17.9338	-0.618458	0.00839092	0.191916
ENSRNOG00000004410	Pax6	3:95707386-95728624	0	0.026729	-7.963	0.00842923	0.192598
ENSRNOG00000003954	Il2rg	X:71162585-71169865	5.28927	13.2823	-1.35837	0.00843412	0.192598
ENSRNOG00000003597	Tuba4a	9:82415605-82419288	88.3837	147.918	-0.729788	0.00846201	0.193081
ENSRNOG00000027276	Xkr4	5:15747614-16140896	1.21803	0.769035	0.662595	0.00848112	0.193364
ENSRNOG00000056246	Gls	9:54212767-54284872	34.7729	21.3088	0.695552	0.0085068	0.193643
ENSRNOG00000058739	Snn	10:4578454-4644570	2.91975	6.66315	-0.983752	0.00856925	0.194602
ENSRNOG00000011568	Rspo3	1:30681681-30766860	4.8483	2.77975	0.735059	0.00859697	0.195077
ENSRNOG00000052444	Samd9	4:28305002-28310178	7.6813	1.59399	2.24081	0.0086087	0.195189
ENSRNOG00000026408	Rnf169	1:164913877-164977633	3.28121	5.49345	-0.757825	0.00862742	0.19546
ENSRNOG00000026650	Tmprss4	8:49469503-49502647	0	0.0158967	-7.93475	0.00863583	0.195496
ENSRNOG00000055382	Hcn1	2:50099576-50499799	0.004384	0	9.62711	0.0086825	0.196325
ENSRNOG00000020950	Syvn1	1:221409271-221417886	9.32431	16.9075	-0.855866	0.00868611	0.196325
ENSRNOG00000004225	Odf4	10:55510340-55515885	0.039066	0	6.68721	0.00871721	0.196873
ENSRNOG00000011623	Rab3c	2:41570597-41785792	0	0.00707367	-9.42601	0.00879593	0.198184
ENSRNOG00000012094	Ltbp2	6:108500112-108596569	3.78617	2.42725	0.657901	0.00882304	0.198639
ENSRNOG00000012205	Lgsn	9:37462693-37490108	0	0.0190497	-7.9192	0.00883653	0.198787
ENSRNOG00000009419	Ptprg	15:12926167-13228607	9.58696	6.51323	0.563973	0.00887861	0.199213
ENSRNOG00000000407	Dcbld1	20:33359196-33453766	2.6082	4.24142	-0.694407	0.00888316	0.199213
ENSRNOG00000033685	Elane	7:12638322-12640232	31.3076	89.6479	-1.4816	0.00891636	0.199746
ENSRNOG00000021157	Ctss	2:197655786-197679458	20.9721	13.6764	0.618368	0.00892083	0.199746
ENSRNOG00000017683	Adam18	16:72139063-72210900	0	0.0504677	-7.85766	0.0089461	0.200156
ENSRNOG00000017505	Npepo	17:507377-846980	6.30389	4.82239	0.741263	0.00898408	0.200832
ENSRNOG00000012684	Bloc1s2	1:263913133-263920962	7.37709	16.2041	-1.15427	0.00901164	0.201031
ENSRNOG00000005690	Lmcd1	4:144192989-144252551	13.1214	8.35387	0.651306	0.00901318	0.201031
ENSRNOG00000031890	Ncam1	8:53839098-53901358	13.35	9.26358	0.666509	0.00905858	0.201398
ENSRNOG00000054296	Hist1h2bo	17:44756555-44834745	744.486	1205.49	-0.682877	0.00906701	0.201398
ENSRNOG00000027831	Map7d3	X:159176680-159244879	1.44294	0.665785	1.06397	0.00909937	0.201857
ENSRNOG00000056836	Cav1	4:44597123-44630200	38.219	24.9301	0.619017	0.00912131	0.202188
ENSRNOG00000017777	Ahcy	3:150587833-150603082	23.7633	37.0191	-0.63455	0.0091758	0.203239
ENSRNOG00000031408	AC097129.1	4:119574844-119591817	0	0.030198	-7.89622	0.00931323	0.205077
ENSRNOG00000047293	LOC100366030	14:6192692-6201090	0	0.181519	-9.44524	0.00932235	0.205077
ENSRNOG00000010421	Wdr91	4:62398797-62438958	12.4982	18.6712	-0.577557	0.0093252	0.205077
ENSRNOG00000021345	Timd2	10:31755505-31790586	0.348324	1.231	-2.03652	0.00937564	0.205763
ENSRNOG00000001270	Hvcn1	12:39822637-39850567	3.36053	6.44713	-0.929976	0.00943266	0.206857
ENSRNOG00000028261	Tppp	1:31870899-31890778	2.87948	1.14616	1.30135	0.00944682	0.207009
ENSRNOG00000039076	Spaca6	1:59701155-59732406	1.09304	0.288939	1.86286	0.00951207	0.207883
ENSRNOG00000014251	Capn5	1:163073124-163129641	4.48268	6.25287	-0.679537	0.00952061	0.207883
ENSRNOG00000032353	Mmp1	8:5703206-5723591	0	0.0257823	-7.93987	0.00952285	0.207883
ENSRNOG00000033099	Dcc	18:66523120-67224566	0.503704	0.288099	0.800684	0.00960456	0.209508
ENSRNOG00000058405	AABR07061039.2	4:103049232-103050006	0	1.98114	-9.46261	0.00966887	0.210441
ENSRNOG00000002691	Shcbp1l	13:70852023-70882340	0.0160847	0	7.80417	0.00968537	0.210607
ENSRNOG00000038976	Galntl6	16:35573058-35802979	0	0.00633667	-9.39741	0.00969744	0.210607
ENSRNOG00000019100	Kif2c	5:136027934-136053210	8.29459	14.1694	-0.755372	0.00973155	0.211156
ENSRNOG00000003365	Cadm3	13:91842333-91873096	7.43557	3.89391	0.902778	0.00978841	0.21223
ENSRNOG00000014290	Grm1	1:4753144-5165859	0	0.00350067	-9.3852	0.00980054	0.212241
ENSRNOG00000005954	Il5ra	4:138795327-138830117	0.0458183	0.24288	-2.41609	0.00980637	0.212241
ENSRNOG00000028707	Np4	16:75387296-75481115	158.394	416.543	-1.36425	0.00981846	0.212241
ENSRNOG00000001339	Psmd9	12:38786540-38805121	14.5994	8.30033	0.826125	0.00985188	0.212804
ENSRNOG00000030715	Cfh	13:56978607-57080622	85.4328	55.8818	0.650246	0.00986643	0.212939
ENSRNOG00000015329	Kpna2	10:95200030-95212111	37.8863	58.2663	-0.613941	0.00987295	0.212939
ENSRNOG00000018694	Lipg	18:70901710-70924708	2.37396	0.99371	1.25546	0.00988749	0.213092
ENSRNOG00000059415	LOC100362172	17:22655999-22678253	0.141812	0	9.49721	0.00991233	0.213468
ENSRNOG00000019598	Vegfa	9:17340341-17355681	25.7543	15.5517	0.777632	0.00993801	0.213859
ENSRNOG00000023440	Phex	X:40460047-40717982	25.533	16.2696	0.646452	0.00994535	0.213859
ENSRNOG00000004137	Ubtd2	10:17327275-17396843	7.48972	4.14576	0.991312	0.00999512	0.214281
ENSRNOG00000011411	Adgrg6	1:8593075-8751860	9.87362	6.25957	0.572149	0.0100023	0.214281
ENSRNOG00000028781	Abcc6	1:101959540-102013243	0	0.00807533	-7.66023	0.0100119	0.214281
ENSRNOG00000005115	Asf1b	19:25077918-25092491	12.964	22.578	-0.786014	0.0100256	0.214302
ENSRNOG00000003232	Slc9a3r1	10:103713045-103730145	8.54498	14.2241	-0.728595	0.010076	0.214635
ENSRNOG00000006966	Nfia	5:116420690-116751416	21.7015	14.3899	0.595981	0.010082	0.214635
ENSRNOG00000011068	Papss2	1:251145253-251230715	88.5382	57.9472	0.613733	0.0100856	0.214635
ENSRNOG00000001224	Itgb2	20:11777783-11815647	10.6885	18.6623	-0.792579	0.010086	0.214635
ENSRNOG00000011054	Laptm5	5:149047681-149069719	46.5578	77.0386	-0.721282	0.0101133	0.214945
ENSRNOG00000004498	Scin	6:59976003-60054279	22.7877	14.9787	0.601797	0.010116	0.214945
ENSRNOG00000039200	AABR07070046.1	8:45659926-45810941	1.94086	0.879921	1.09901	0.0101467	0.215036
ENSRNOG00000048623	LOC100911564	9:16314173-16317413	0.058811	0	6.47897	0.0101497	0.215036
ENSRNOG00000008059	Rnf17	15:36609296-36744762	0	0.003144	-7.62189	0.010166	0.215125
ENSRNOG00000047258	Prss55	15:47433566-47442664	0.093445	0	7.78886	0.0102463	0.216285
ENSRNOG00000003613	Mid1	X:25458771-25628272	5.19348	3.29593	0.636645	0.0103315	0.217764
ENSRNOG00000019181	Synpo	18:55855196-55916895	17.9772	12.4366	0.69267	0.0103823	0.218355
ENSRNOG00000042533	Accsl	3:82762862-82777814	0.01186	0	6.41561	0.0104186	0.218849
ENSRNOG00000048389	Fgf18	10:18047109-18063391	1.94072	0.666257	1.53357	0.0104293	0.218854
ENSRNOG00000050898	AABR07034730.2	11:85532526-85620176	0.374088	6.62914	-3.62887	0.0104441	0.218854
ENSRNOG00000003595	Lhx4	13:73348842-73400416	0	0.0342297	-7.70836	0.0104563	0.21895
ENSRNOG00000046975	Sult4a1	7:124958546-124982566	0.0177257	0	7.65802	0.0104856	0.219404
ENSRNOG00000008298	Dock7	5:117596136-117780777	10.0996	6.92107	0.547336	0.0105807	0.221072
ENSRNOG00000018905	Armc4	17:60287203-60474031	0.083786	0.0237097	1.81119	0.0106419	0.222008
ENSRNOG00000030389	Lrrc30	9:115849732-115850634	0.0630817	0.891764	-3.78223	0.0107567	0.224053
ENSRNOG00000016377	Cep55	1:256745288-256760796	1.70103	3.84595	-1.1687	0.0107623	0.224053
ENSRNOG00000031918	AABR07065789.2	6:141364359-141365198	0	0.204063	-6.37879	0.0107727	0.224106
ENSRNOG00000046258	B3gnt5	11:84919066-84931160	0.183254	0.852369	-2.19623	0.0108497	0.225382
ENSRNOG00000045770	Hira	11:86168196-86276430	2.98456	6.26147	-1.08951	0.0108942	0.22598
ENSRNOG00000014652	Aqp8	1:193424812-193430676	0.074023	0	7.71726	0.0110068	0.227972
ENSRNOG00000033575	Emid1	14:85355514-85400390	0.617772	2.01453	-1.58358	0.0110304	0.228146
ENSRNOG00000028708	Ntsr1	3:175885894-176046345	0.136288	0.00307633	4.81005	0.0110989	0.229234
ENSRNOG00000058437	LOC684773	17:44758460-44758852	559.145	931.57	-0.724541	0.0111982	0.230704
ENSRNOG00000008409	Myo1f	7:18440742-18491448	9.11961	15.2688	-0.73658	0.0112186	0.230876
ENSRNOG00000027900	Glt6d1	3:3255638-3266260	0	0.0374333	-7.5512	0.0112815	0.231635
ENSRNOG00000027264	Dagla	1:226297016-226353611	1.99319	1.09114	0.870059	0.0112843	0.231635
ENSRNOG00000046834	C3	9:9721105-9747167	14.2411	28.2607	-0.9702	0.0112905	0.231635
ENSRNOG00000053719	AABR07065656.5	6:139012967-139102378	0.018146	0.468755	-4.62241	0.0112957	0.231635
ENSRNOG00000014336	Mcm5	19:14523554-14561278	29.8771	45.2594	-0.589748	0.0113314	0.232201
ENSRNOG00000029089	Foxr1	8:48754154-48762342	0.065805	0.670264	-3.77944	0.0113579	0.232578
ENSRNOG00000015796	Msh2	6:11215963-11274932	11.6033	17.347	-0.573107	0.0113892	0.233053
ENSRNOG00000013279	LOC681458	1:263968134-264004008	0	0.0376443	-9.28062	0.011447	0.234053
ENSRNOG00000025293	Prss57	7:12798868-12804283	0.267086	1.63648	-2.56504	0.0115068	0.234519
ENSRNOG00000006645	Ryr3	3:104117377-104504204	0.874417	0.454542	0.832507	0.0115098	0.234519
ENSRNOG00000009192	Rnaseh2b	15:45422010-45464892	11.1107	17.1199	-0.613882	0.0115379	0.234926
ENSRNOG00000011441	Tpd52	2:95008311-95040514	7.29164	7.66065	0.85632	0.0115489	0.234982
ENSRNOG00000047627	AABR07002896.1	1:88522570-88583015	0	0.415641	-9.13876	0.0115643	0.235129
ENSRNOG00000013791	Enpp3	1:21613148-21684480	6.73191	4.42781	0.607332	0.0116511	0.235893
ENSRNOG00000018141	RGD1307443	17:42165817-42226377	0	0.006658	-7.56843	0.0116632	0.235972
ENSRNOG00000032671	AABR07065778.1	6:140979710-140980193	0	0.340263	-6.37394	0.0117611	0.236892
ENSRNOG00000018247	Dhx58	10:88599680-88611105	2.80818	0.613109	2.17123	0.0118332	0.238072
ENSRNOG00000004516	Itgbl1	15:110114148-110378969	21.5685	12.8365	0.739902	0.0118704	0.238487
ENSRNOG00000010468	Elovl6	2:234183771-234296145	5.59931	2.58055	0.718712	0.0118812	0.238536
ENSRNOG00000032973	Il13ra2	X:118443823-118513061	4.80077	2.81669	0.769476	0.0118941	0.238629
ENSRNOG00000013914	Gpr132	6:137652213-137669733	0.648158	2.15396	-1.70809	0.0119296	0.238769
ENSRNOG00000018797	Myrip	8:128972311-129139251	0.669799	0.363965	0.880484	0.0119355	0.238769
ENSRNOG00000029260	Pitpnm2	12:37771177-37903855	5.89606	8.85375	-0.759595	0.0119491	0.238769
ENSRNOG00000020479	Pik3c2a	1:185210922-185326314	6.09527	3.94693	0.623903	0.0119588	0.238769
ENSRNOG00000021681	Eea1	7:37018459-37186732	8.92548	5.14208	0.903296	0.0119592	0.238769
ENSRNOG00000032884	Scn11a	8:128450801-128521109	0.00561233	0	7.54646	0.0120781	0.240808
ENSRNOG00000003259	C1qtnf1	10:107455845-107477162	33.0144	21.0649	0.640577	0.0121437	0.241945
ENSRNOG00000019577	Adamts19	18:53915807-54099120	0.637241	0.304297	1.06036	0.0121604	0.241945
ENSRNOG00000003294	Cdrt4	10:49359837-49400193	0.0341557	0	9.28055	0.0122236	0.242823
ENSRNOG00000034233	Fyttd1	11:71113569-71136673	18.074	10.8328	0.70975	0.0122389	0.242823
ENSRNOG00000013628	Cela2a	5:160374031-160383782	0	0.0376963	-7.43482	0.0122552	0.242823
ENSRNOG00000010106	Faxc	5:36076565-36135884	1.39828	0.712731	0.968584	0.0122742	0.243033
ENSRNOG00000003283	Rcsd1	13:83854664-83917021	13.4568	23.6422	-0.802506	0.0123617	0.244596
ENSRNOG00000027183	Zfyve9	5:128234909-128333805	7.84722	5.31769	0.560703	0.012417	0.245444
ENSRNOG00000018557	Cdh22	3:161575631-161917285	0.00703033	0.0611243	-3.11585	0.0124216	0.245444
ENSRNOG00000017118	P4ha3	1:165295847-165330322	15.1505	9.84439	0.625857	0.0124949	0.246216
ENSRNOG00000019937	Kcnk1	19:58823814-58862926	2.93285	1.61601	0.865976	0.0125386	0.246908
ENSRNOG00000012274	Ddi2	5:160230955-160282810	18.394	23.1629	-0.765032	0.0125625	0.247084
ENSRNOG00000030016	Robo3	8:39892792-39907478	0	0.0120783	-6.43956	0.0126141	0.247716
ENSRNOG00000014002	St7l	2:207350651-207473857	5.0139	3.07888	0.723288	0.0126456	0.248164
ENSRNOG00000028248	Lca5l	11:36512974-36533073	0.019451	0	7.53422	0.0127413	0.249701
ENSRNOG00000014791	Peg3	1:70222964-70237443	109.296	67.4075	0.692213	0.0128335	0.251337
ENSRNOG00000007319	Trib3	3:147813473-147819571	4.42317	1.21896	1.89259	0.012847	0.251431
ENSRNOG00000037997	Tssk2	11:87221613-87236445	0.026335	0	7.56651	0.0128768	0.251842
ENSRNOG00000018659	Csf1	2:210522375-210550560	19.8538	13.6078	0.581668	0.0129142	0.252403
ENSRNOG00000024207	Fgfrl1	14:2018500-2032593	19.5396	11.8196	0.72343	0.0129349	0.252635
ENSRNOG00000004330	Chrdl1	X:114554359-114658931	3.9972	2.63355	0.605919	0.0129907	0.25338
ENSRNOG00000023258	Nfkb1	2:240773456-240866689	13.6956	19.974	-0.54398	0.0130151	0.253596
ENSRNOG00000025823	Rbm46	2:181831244-181874223	0	0.027335	-9.08656	0.0130194	0.253596
ENSRNOG00000028895	Rtp4	11:80638945-80650802	3.7454	0.873547	2.08174	0.0130659	0.25433
ENSRNOG00000016490	Nox3	1:44550994-44615760	0	0.018894	-9.13496	0.0130912	0.25465
ENSRNOG00000050332	LOC103690053	17:57507659-57526461	0	0.058872	-8.99378	0.0131617	0.255562
ENSRNOG00000055454	Arl13a	X:105011489-105037801	0	0.013252	-7.35945	0.0131648	0.255562
ENSRNOG00000004284	Btg1	7:37812831-37815088	109.112	170.937	-0.648179	0.0133369	0.258036
ENSRNOG00000031778	Mef2d	2:187512164-187538026	18.3327	26.9655	-0.556485	0.0133371	0.258036
ENSRNOG00000013178	Cmip	19:49759913-50000535	20.5472	30.6076	-0.554378	0.0133863	0.258814
ENSRNOG00000005274	Vrk1	6:129835919-129902793	15.442	23.388	-0.589477	0.0134087	0.258847
ENSRNOG00000050066	AABR07051583.1	3:17507867-17560995	0.202233	3.44943	-4.27818	0.013415	0.258847
ENSRNOG00000011561	Nln	2:34087880-34185812	7.4639	11.3737	-0.555997	0.0134437	0.259226
ENSRNOG00000038891	Grxcr1	14:41663688-41786084	0.0102697	0	9.14861	0.0134634	0.259433
ENSRNOG00000029814	Prtn3	7:12643516-12646960	25.8001	71.3817	-1.42843	0.0135359	0.260655
ENSRNOG00000017714	Usp3	8:72207972-72285031	7.43801	12.896	-0.737545	0.0135716	0.261168
ENSRNOG00000018413	Per3	5:168086998-168123395	14.3676	8.01698	0.774277	0.0136498	0.262088
ENSRNOG00000016102	Ebf3	1:209523157-209641123	5.95623	4.09355	0.542005	0.0136759	0.262088
ENSRNOG00000026573	Ophn1	X:68189161-68563137	6.97767	4.76299	0.545947	0.0136817	0.262088
ENSRNOG00000027468	Slc6a15	7:45328105-45382229	1.86881	1.07471	0.912876	0.0136977	0.262088
ENSRNOG00000003745	Atf3	13:109817728-109849632	2.35744	0.73665	1.23875	0.0137009	0.262088
ENSRNOG00000031536	Syndig1	3:145032200-145199356	0.0177317	0.339655	-4.21688	0.01371	0.262088
ENSRNOG00000014686	Kcnd3	2:207923775-208140727	0.463646	0.174064	1.39103	0.0137106	0.262088
ENSRNOG00000053047	Top2a	10:86901007-86932154	47.3288	72.3436	-0.604914	0.0137331	0.262344
ENSRNOG00000022044	Cabp4	1:219383452-219388009	0.048622	0.41953	-3.08301	0.013815	0.263385
ENSRNOG00000004731	Ano3	3:101840630-102151489	0.003964	0	9.1213	0.0138151	0.263385
ENSRNOG00000042528	Tmem190	1:72630238-72632185	0.078606	0	6.21647	0.0138304	0.263501
ENSRNOG00000028661	Ctcfl	3:171145584-171166454	0	0.0175117	-7.42311	0.0138691	0.263715
ENSRNOG00000051948	Hcfc1	X:156761489-156837227	19.8307	29.5573	-0.554147	0.0138942	0.263976
ENSRNOG00000012499	Rarg	7:143839980-143863186	33.108	21.8589	0.590757	0.0139183	0.264126
ENSRNOG00000006732	Spo11	3:170994038-171013185	0.018182	0.247527	-3.6059	0.0139408	0.26432
ENSRNOG00000025584	Agap2	7:70364813-70377422	1.53606	3.97042	-1.33905	0.0139469	0.26432
ENSRNOG00000021370	Ccdc69	10:40392460-40419054	0.467192	2	-2.06517	0.014048	0.265766
ENSRNOG00000013587	Fam135a	9:30255459-30321323	4.5474	2.82972	0.681007	0.0140509	0.265766
ENSRNOG00000043176	AABR07059308.1	4:14071507-14113255	37.3262	25.4513	0.608896	0.0140603	0.265769
ENSRNOG00000006926	Atp6v0d2	5:33843519-33892462	22.4495	15.3696	0.546003	0.0140773	0.265914
ENSRNOG00000060550	Epn2	10:47795524-47857326	7.55922	5.05806	0.618469	0.0141402	0.266753
ENSRNOG00000004554	Dcn	7:38742051-38782323	91.0953	60.6462	0.584207	0.0142042	0.267784
ENSRNOG00000037695	Sgpp2	9:84203072-84319874	0.460823	1.66478	-1.80653	0.0142393	0.267955
ENSRNOG00000018434	Stab1	16:7222067-7250924	15.831	10.5664	0.582816	0.0142412	0.267955
ENSRNOG00000061508	Reps2	X:33884499-34063823	1.93653	1.20339	1.52576	0.0142815	0.268537
ENSRNOG00000016816	Phf2	17:16204427-16274624	16.3945	23.7516	-0.532249	0.0142977	0.268666
ENSRNOG00000055705	Htr7	KL568473.1:279960-399184	0	0.0422303	-8.89782	0.0143228	0.268962
ENSRNOG00000006695	Rbck1	3:147793017-147809919	14.2399	21.8519	-0.637174	0.0143647	0.269397
ENSRNOG00000049198	LOC102548682	17:43791657-43792067	294.837	495.421	-0.739871	0.0143804	0.269516
ENSRNOG00000005708	Mmp16	5:31566720-31810484	20.7852	13.3754	0.615721	0.0144234	0.269862
ENSRNOG00000006631	Sema3e	4:17272511-17594598	0.615764	0.335326	0.908357	0.0144271	0.269862
ENSRNOG00000014961	Pdpn	5:161947137-161981441	12.4136	8.03207	0.625455	0.0144753	0.270341
ENSRNOG00000025898	LOC690142	7:132378273-132417712	0	0.00849367	-7.31461	0.0144809	0.270341
ENSRNOG00000026762	RT1-DOa	20:3889370-3892449	0	0.078358	-6.33824	0.0144945	0.27042
ENSRNOG00000025889	Gnas	3:172374957-172428483	17.5606	11.1938	0.646726	0.0145512	0.270864
ENSRNOG00000023352	Fam78a	3:11086017-11103821	4.3138	8.68509	-1.0423	0.0145554	0.270864
ENSRNOG00000008203	Synpr	15:14559471-14737704	0.00666567	0	9.06331	0.0145697	0.270943
ENSRNOG00000057702	Insrr	2:187162017-187181395	0	0.018321	-7.27531	0.0146284	0.271615
ENSRNOG00000058111	Itga2	2:47000323-47096961	5.82918	3.95468	0.559344	0.0146342	0.271615
ENSRNOG00000016593	Pde6c	1:256822334-256877810	0.0316203	0.169612	-2.41351	0.0146532	0.271644
ENSRNOG00000029658	Rnf213	10:108527740-108624688	9.11739	4.01654	1.16483	0.0146546	0.271644
ENSRNOG00000003786	Tspan6	X:104719940-104726816	47.874	29.851	0.684037	0.0147404	0.272706
ENSRNOG00000010701	Depdc1b	2:40000313-40069975	3.88726	6.24618	-0.671844	0.0147586	0.272868
ENSRNOG00000017689	Itih3	16:6992062-7007287	0.384636	0.065727	2.53914	0.0148149	0.273732
ENSRNOG00000002042	Gfi1	14:3057673-3084460	1.27256	2.96876	-1.59577	0.0148411	0.274041
ENSRNOG00000046292	AABR07017635.1	15:29465226-29465807	0	0.239602	-6.08514	0.0148744	0.274056
ENSRNOG00000028991	AC125757.1	5:2980046-2982603	0	0.0521283	-6.08514	0.0148751	0.274056
ENSRNOG00000009730	Cyp7b1	2:102701903-102871257	2.82523	1.94682	0.658794	0.0149311	0.274393
ENSRNOG00000000994	Stxbp2	12:2180150-2191175	9.07109	15.9315	-0.804302	0.0149346	0.274393
ENSRNOG00000007012	Ly75	3:46365165-46457201	1.40474	2.30462	-0.710859	0.0149365	0.274393
ENSRNOG00000007229	Nr0b2	5:151776004-151779319	0.104072	0.785949	-2.89506	0.0150077	0.275285
ENSRNOG00000008478	Mmp13	8:5522739-5533018	508.667	347.798	0.548186	0.0150083	0.275285
ENSRNOG00000021735	Akr1c15	17:69835330-69862110	1.9507	0.902238	1.11225	0.0150387	0.275477
ENSRNOG00000026504	Fam114a1	14:44943172-45002719	39.3472	26.525	0.568216	0.0150435	0.275477
ENSRNOG00000059748	hist1h2ail2	17:44794130-44794522	558.72	900.631	-0.676678	0.0150909	0.275819
ENSRNOG00000016872	Plppr4	2:220298245-220341866	0.276976	0.07655	1.84977	0.0151447	0.276627
ENSRNOG00000057690	LOC100912564	17:44815684-44815995	1089.42	1728.97	-0.653035	0.0151567	0.27667
ENSRNOG00000012742	Irx2	1:33271977-33275540	0.124333	0.00366933	4.63114	0.0151943	0.277181
ENSRNOG00000009805	Wasf2	5:151343493-151381238	19.4145	28.5159	-0.549777	0.0152441	0.277736
ENSRNOG00000025938	Lin28b	20:50486809-50564987	0	0.0124013	-8.80262	0.0153205	0.278598
ENSRNOG00000004452	Aqp12a	9:100156154-100166218	0	0.0344797	-7.34583	0.0153438	0.278754
ENSRNOG00000007764	Frmd4b	4:129658840-129846642	8.67596	6.02624	0.52622	0.0153485	0.278754
ENSRNOG00000003915	Pacc1	13:110007010-110031895	5.29101	8.76625	-0.726401	0.0153603	0.278794
XLOC_061809	XLOC_061809	18:1538660-1685659	0.51607	0.244917	1.06243	0.0153832	0.278943
ENSRNOG00000018078	Olr36	1:164717029-164756039	0	0.0275757	-8.94698	0.015388	0.278943
ENSRNOG00000056052	AABR07060980.1	4:102147211-102187733	0.525546	1.63208	-3.30383	0.0154007	0.278999
ENSRNOG00000025359	Spesp1	8:67217802-67232298	0	0.0232783	-7.31197	0.0154691	0.280029
ENSRNOG00000019339	AABR07051518.1	3:15084634-15278645	0.03435	0.120152	-1.79106	0.0155219	0.280437
ENSRNOG00000049315	AABR07065827.1	6:143056734-143065639	0.356871	2.88331	-2.99937	0.0155514	0.280437
ENSRNOG00000002265	Casr	11:67188630-67258771	2.05599	0.69013	1.56213	0.0155538	0.280437
ENSRNOG00000026951	Susd5	8:122331583-122368368	132.333	87.5708	0.595224	0.0155569	0.280437
ENSRNOG00000001854	Tmtc1	4:182625386-182844291	3.36552	2.21985	0.594592	0.0156042	0.28109
ENSRNOG00000004747	Slc30a8	7:91832988-91867300	0.036301	0	8.97646	0.0156286	0.28119
ENSRNOG00000017414	Irf7	1:214216019-214252456	16.9026	4.34999	1.28048	0.0157324	0.282514
ENSRNOG00000013991	Creg2	9:46360061-46401911	0.0265727	0	8.96882	0.0157516	0.282666
ENSRNOG00000010078	Spag1	7:74994605-75054293	0.231698	0.905061	-1.38595	0.0157605	0.282666
ENSRNOG00000013554	Treml2	9:14657148-14669462	1.45407	3.27952	-1.39957	0.0158531	0.283781
ENSRNOG00000042193	AABR07034729.1	11:85263536-85430845	1.86567	9.04136	-2.23991	0.0158621	0.283781
ENSRNOG00000016672	Fam217a	17:30670171-30676260	0.0239567	0	6.15507	0.015884	0.283996
ENSRNOG00000008376	LOC100909595	4:155387449-155634233	5.13599	2.58728	1.32872	0.0159136	0.284348
ENSRNOG00000007894	Mpdz	5:99413187-99566318	4.49364	3.03823	0.56569	0.0159401	0.284645
ENSRNOG00000054978	H1f2	17:43639749-43640387	1139.97	1843.4	-0.677748	0.01596	0.284805
ENSRNOG00000009263	Ifi27	6:127327959-127334428	60.588	35.5038	0.762575	0.0159808	0.284841
ENSRNOG00000016953	Chst4	19:41631715-41640367	0.0368693	0	7.25579	0.0160346	0.285408
ENSRNOG00000027520	Pls3	X:119030419-119124250	36.0983	25.055	0.526932	0.0160424	0.285408
ENSRNOG00000005094	C1qtnf7	14:72011461-72122158	1.45854	0.752024	0.84183	0.0161145	0.286255
ENSRNOG00000028814	Oasl2	12:47469598-47482961	5.63713	2.08884	1.41731	0.0161199	0.286255
ENSRNOG00000030111	Cyp11b3	7:116156219-116255167	0	0.0127977	-7.20811	0.0161619	0.286518
ENSRNOG00000022139	Serpinb9d	17:32516679-32524336	0	0.042114	-7.25334	0.0161621	0.286518
ENSRNOG00000028975	Hist2h3c2	2:198359760-198389291	751.042	1210.37	-0.664253	0.016174	0.286518
ENSRNOG00000001845	Top3b	11:88346313-88374679	6.00724	9.4393	-0.650308	0.0163105	0.28857
ENSRNOG00000022256	Cxcl10	14:17210733-17212930	1.71724	0.148917	3.46536	0.0163667	0.289318
ENSRNOG00000008479	Slc8a1	6:4258991-4520604	7.57896	5.27747	0.522673	0.0164499	0.290144
ENSRNOG00000006137	Arid1a	5:151904684-151977636	23.8108	34.1319	-0.517678	0.016488	0.290601
ENSRNOG00000019527	Chrnd	9:94286550-94294968	0.0130393	0.190267	-3.78445	0.0165231	0.290721
ENSRNOG00000018803	Mrtfa	7:122234012-122403667	6.73261	9.81709	-0.543251	0.0166167	0.291924
ENSRNOG00000059790	Krt78	7:143545411-143552588	0.018031	0	6.01896	0.0166219	0.291924
ENSRNOG00000003407	Ptpn14	13:108696336-108841511	12.9371	8.92185	0.533893	0.016692	0.292976
ENSRNOG00000047388	Vom2r4	10:111716966-111735354	0	0.017178	-7.22038	0.0167662	0.29392
ENSRNOG00000026605	Ifi27l2b	6:127336305-127337791	10.5981	2.59345	2.00852	0.0168444	0.294582
ENSRNOG00000037466	Lrcol1	12:52384192-52396066	0.007846	0.161044	-4.34265	0.0168746	0.294921
ENSRNOG00000001656	Kcnj15	11:35526635-35585390	0.461194	1.24654	-1.29412	0.0169239	0.295581
ENSRNOG00000037799	Hdx	X:82875339-83151511	0.247823	0.087439	1.505	0.0170285	0.296599
ENSRNOG00000020726	Sipa1	1:221006340-221015929	18.3459	29.889	-0.696719	0.0170354	0.296599
ENSRNOG00000014574	Entpd1	1:259739955-259819494	5.77656	3.09403	1.08515	0.0170485	0.296599
ENSRNOG00000002171	Phldb2	11:57265732-57481589	6.63437	4.3075	0.525494	0.0170532	0.296599
ENSRNOG00000022356	Zc2hc1a	2:96482944-96520137	4.29568	2.52431	0.773752	0.0170914	0.297063
ENSRNOG00000028344	LOC103694874	20:13670066-13678089	0.120949	0	8.87304	0.0171005	0.297063
ENSRNOG00000004217	Stk10	10:17421075-17523855	10.2475	16.7189	-0.674902	0.0171907	0.298089
ENSRNOG00000048917	LOC100909604	4:82173293-82263302	3.02916	1.58965	0.982205	0.0172989	0.299244
ENSRNOG00000012840	Sparc	10:40742400-40764185	3667.02	2545.39	0.525188	0.0173706	0.300128
ENSRNOG00000004392	Aatk	10:109188112-109224370	0.730921	1.59783	-1.13157	0.0173751	0.300128
ENSRNOG00000003544	Tbx4	10:73333119-73362783	3.24155	1.60281	1.01131	0.0173937	0.300162
ENSRNOG00000017500	Mtss2	19:40905847-40925660	23.3621	15.7979	0.564706	0.0174092	0.300249
ENSRNOG00000016488	Pltp	3:161304469-161322289	35.1174	24.1096	0.547236	0.0174456	0.300696
ENSRNOG00000005390	Nup210	4:122644135-122741110	23.7279	37.1668	-0.63396	0.0174812	0.30077
ENSRNOG00000023404	Slc9b2	2:240495371-240519141	12.0428	7.63318	0.658123	0.0175219	0.301109
ENSRNOG00000009848	Il18	8:54988056-55016299	9.09661	3.0531	1.51731	0.0176211	0.302452
ENSRNOG00000023601	Elavl4	5:130001372-130085838	0.0119727	0	8.83236	0.0176536	0.302828
ENSRNOG00000005715	Lgr4	3:101051955-101152119	13.5044	9.30409	0.538826	0.0177115	0.303471
ENSRNOG00000001312	Pdgfa	12:17734133-17760708	9.49223	7.23373	0.850107	0.0177122	0.303471
ENSRNOG00000054017	LOC100912564	17:44503446-44527865	149.215	235.431	-0.616522	0.0177754	0.304314
ENSRNOG00000059949	LOC102549061	17:43627930-43628310	550.987	886.679	-0.673822	0.0177914	0.304314
ENSRNOG00000014590	Stk33	1:173872736-174047572	0.076194	0.00783233	3.24912	0.0177931	0.304314
ENSRNOG00000028225	Tnni3k	2:261069203-261337163	0.00348667	0	8.81721	0.0178569	0.30468
ENSRNOG00000060552	AABR07065705.5	6:139718892-139719323	0.0196043	0.896569	-4.88873	0.0179636	0.306137
ENSRNOG00000004589	Galnt16	6:104068547-104251353	4.95813	3.12923	0.662999	0.0179809	0.30625
ENSRNOG00000055518	AABR07024303.1	KL568458.1:65160-91925	0.0121643	0.12567	-3.38249	0.0180509	0.307262
ENSRNOG00000017568	Rit2	18:23700013-24057917	0.394623	0.203065	0.96314	0.0180768	0.307375
ENSRNOG00000001187	Oasl	12:47444104-47456894	1.86913	0.473246	1.95593	0.018079	0.307375
ENSRNOG00000014087	Kifc3	19:10320604-10339178	6.40772	3.59364	0.832119	0.0180992	0.307536
ENSRNOG00000024213	Golim4	2:174322673-174413236	26.285	17.7941	0.575081	0.0181956	0.30886
ENSRNOG00000039582	RGD1561161	2:45168439-45241179	3.98586	2.46601	0.689654	0.0181986	0.30886
ENSRNOG00000000137	Ly86	17:28104528-28191436	1.40094	3.17383	-1.1553	0.018265	0.309804
ENSRNOG00000043167	Itga9	8:127271289-127572988	8.45073	5.89483	0.523129	0.0182879	0.31001
ENSRNOG00000005270	Sycp3	7:29029263-29044251	0.020925	0	7.17247	0.0183614	0.310889
ENSRNOG00000052887	Dnajc6	5:120340646-120492487	0.281888	0.577707	-1.08304	0.018428	0.31165
ENSRNOG00000002659	Ciita	10:5213350-5260608	0.291864	0.781967	-1.41844	0.0185197	0.312526
ENSRNOG00000014426	Lox	18:47500330-47577819	54.3224	36.8022	0.555625	0.0185265	0.312526
ENSRNOG00000022015	Cntrl	3:14215645-14371681	4.97792	6.71348	-0.636025	0.0185337	0.312526
ENSRNOG00000009542	Kcnh5	6:97872831-98157087	0	0.00291633	-8.58219	0.0185341	0.312526
ENSRNOG00000035079	AABR07049695.1	5:133620706-133644796	0	0.0835773	-7.28154	0.0185565	0.312604
ENSRNOG00000000068	Ppp2r5a	13:110033550-110077946	25.3952	36.6411	-0.525047	0.0185823	0.312767
ENSRNOG00000008697	Ccn3	7:94375020-94383024	24.5902	14.1325	0.794183	0.0186165	0.312767
ENSRNOG00000021525	Nbeal1	9:66951484-67110693	11.4387	7.19061	0.654942	0.0186341	0.312767
ENSRNOG00000021198	Hist1h2bq	17:43617168-43817767	336.263	624.431	-0.625612	0.0186355	0.312767
ENSRNOG00000002381	Bmp3	14:12359363-12387102	12.9027	8.55194	0.5932	0.0186553	0.312917
ENSRNOG00000011803	Lrfn2	9:13845757-13877130	0	0.00835267	-6.97238	0.0187037	0.313444
ENSRNOG00000021061	Map4k2	1:221710670-221725656	4.55154	8.02274	-0.812288	0.0187085	0.313444
ENSRNOG00000007284	Slc2a1	5:138154673-138182897	21.1579	13.812	0.614331	0.0187356	0.313595
ENSRNOG00000001377	Ddx54	12:41470557-41485122	12.0004	18.5903	-0.629964	0.018793	0.313672
ENSRNOG00000008922	Trim14	5:62128941-62153786	0.689873	2.13786	-1.62835	0.0188476	0.314206
ENSRNOG00000008585	Tmbim7	4:27606078-27638676	0	0.00811733	-6.98349	0.0188524	0.314206
ENSRNOG00000032929	Incenp	1:225925773-225952516	26.4988	39.7536	-0.57262	0.0189197	0.314781
ENSRNOG00000027992	Dscam	11:37004902-37253776	0.00590233	0.0481237	-2.98868	0.0192083	0.318845
ENSRNOG00000001113	Mmd2	12:14021727-14078134	0	0.0142893	-8.5374	0.0192812	0.31987
ENSRNOG00000029043	Zfp84	1:87650207-87915794	4.58435	6.24817	-0.610583	0.0193407	0.320317
ENSRNOG00000031431	Cdca8	5:142911305-142933526	15.5956	24.1238	-0.616548	0.019346	0.320317
ENSRNOG00000017392	Fgf2	2:124080979-124139884	2.24717	1.2057	0.91194	0.0193527	0.320317
ENSRNOG00000030641	Shisal2a	5:127967903-127983515	0	0.0571313	-8.67916	0.0193953	0.320693
XLOC_140474	XLOC_140474	8:46226946-46241016	1.34811	3.05018	-1.17701	0.0194001	0.320693
ENSRNOG00000049076	Vwc2	14:91201730-91348219	0.166619	0.0591587	1.48368	0.0194125	0.320693
ENSRNOG00000020882	Shkbp1	1:84154703-84168074	4.07941	7.49526	-0.883602	0.019428	0.320693
ENSRNOG00000048161	Tlr9	8:114916122-114920171	1.37397	4.07439	-1.55951	0.0194327	0.320693
ENSRNOG00000043143	Eml1	6:132383337-132450393	9.22193	6.35307	0.538353	0.0194711	0.320983
ENSRNOG00000000632	Cdk1	20:20576377-20591549	34.9128	52.8264	-0.598626	0.0195007	0.321287
ENSRNOG00000007152	Bhlhe40	4:140703619-140709319	20.5011	11.868	0.787695	0.0195558	0.32201
ENSRNOG00000001957	Sult1e1	14:22072024-22089248	0	0.0511903	-8.66861	0.0196162	0.32282
ENSRNOG00000015461	Serpine2	9:85560863-85626094	232.296	157.123	0.57044	0.0196339	0.322925
ENSRNOG00000002052	Ccdc80	11:60645086-60679555	75.6547	53.3111	0.508736	0.0197163	0.324096
ENSRNOG00000005933	Yap1	8:6135493-6203579	30.8591	21.1577	0.539833	0.019756	0.324297
ENSRNOG00000042860	Pappa2	13:76389150-76660245	4.54243	3.08891	0.580269	0.0197589	0.324297
ENSRNOG00000050106	Rcc1	5:150509040-150525254	14.3845	21.9171	-0.606428	0.0197624	0.324297
ENSRNOG00000022218	Ifi44	2:256897772-256915569	4.58123	1.91364	1.39827	0.0198348	0.325017
ENSRNOG00000022373	Dennd4b	2:189629297-189642183	5.9524	10.1878	-0.771215	0.0198365	0.325017
ENSRNOG00000018159	Anxa4	4:118538777-118595580	32.7603	23.1332	0.501938	0.0198402	0.325017
ENSRNOG00000060355	H1f5	17:44766313-44766981	917.183	1398.96	-0.596417	0.0198841	0.325551
ENSRNOG00000020030	Crlf1	16:20675042-20686317	2.85189	1.18899	1.26908	0.0200976	0.328298
ENSRNOG00000011022	Mep1a	9:20048121-20077702	0	0.009729	-7.07394	0.0201307	0.328653
ENSRNOG00000012019	B3galnt1	2:166226754-166255302	7.6508	4.80708	0.669171	0.0201533	0.328741
ENSRNOG00000025702	Kdm2b	12:39078119-39161956	8.64449	12.3441	-0.512827	0.0201597	0.328741
ENSRNOG00000019942	Fbxo17	1:86914137-86919236	0	0.0542337	-7.00468	0.0201704	0.328741
ENSRNOG00000002180	Tbc1d1	14:45598743-45797978	11.3891	16.7524	-0.544031	0.0202567	0.329874
ENSRNOG00000030210	Fndc1	1:47605262-47687504	19.393	12.5641	0.624141	0.0202629	0.329874
ENSRNOG00000002051	Synj1	11:31103599-31180642	8.97629	6.51453	0.599826	0.0203132	0.330132
ENSRNOG00000051568	AABR07004776.1	1:155954832-156086692	0.154228	0.001115	6.98627	0.0203319	0.33025
ENSRNOG00000015596	Efhd1	9:94362299-94408885	2.26796	1.19932	0.913908	0.0203706	0.330504
ENSRNOG00000020263	Atp1a3	1:81852429-81881549	1.37013	2.69674	-0.973992	0.0205085	0.332555
ENSRNOG00000026226	Hook1	5:114940053-115000691	0.790336	1.46316	-0.885646	0.0205603	0.333206
ENSRNOG00000047635	Tmem178b	4:68011932-68059249	0.0238123	0.10947	-2.18565	0.0207364	0.335828
ENSRNOG00000028624	Kif26b	13:96775357-97173469	2.53944	1.64655	0.619014	0.0207454	0.335828
ENSRNOG00000004494	Lta4h	7:34288365-34320235	27.2069	43.4613	-0.663974	0.0207909	0.336204
ENSRNOG00000008816	Gpnmb	4:78694447-78715683	132.298	82.7858	0.690627	0.0208037	0.336204
ENSRNOG00000013573	Atp6v1b1	4:115416580-115437206	0.0123103	0	6.94001	0.0209344	0.338062
ENSRNOG00000028207	Colgalt2	13:69797880-69901170	35.3752	24.2675	0.542623	0.0209698	0.338062
ENSRNOG00000015863	Npsr1	8:25246292-25482647	0	0.003359	-8.52151	0.020989	0.338062
ENSRNOG00000008031	Cacna2d4	4:151298548-151409263	0	0.00222467	-6.85409	0.021013	0.338062
ENSRNOG00000003633	Rcvrn	10:54246250-54253996	0	0.03744	-7.0871	0.0210245	0.338062
ENSRNOG00000003703	Mcm6	13:45042882-45068077	40.98	59.5608	-0.53085	0.021107	0.338967
ENSRNOG00000054560	Sh2d3c	3:11756384-11793593	5.75887	10.1964	-0.830204	0.0211236	0.338967
ENSRNOG00000008737	Tbc1d21	8:63138802-63155825	0	0.0167863	-6.93188	0.0211338	0.338967
ENSRNOG00000033527	Pappa1	5:80920568-81150940	4.76724	3.17869	0.580588	0.0211398	0.338967
ENSRNOG00000020998	AABR07006283.1	1:228032983-228053645	0	0.035896	-8.42386	0.0211633	0.338967
ENSRNOG00000014979	Themis	1:17171631-17378047	0.0101873	0.0832633	-3.0145	0.0212689	0.340278
ENSRNOG00000060846	Morc4	X:111142602-111191936	6.6849	4.06636	0.697517	0.02141	0.342345
ENSRNOG00000012556	Isl1	2:48487736-48501436	0	0.0201107	-7.02795	0.0214709	0.342435
ENSRNOG00000013000	Ldhb	4:176701983-176720012	11.2389	17.6787	-0.647745	0.021495	0.342561
ENSRNOG00000014713	Csgalnact2	4:150153844-150185044	14.1356	9.54979	0.563758	0.0215243	0.342838
ENSRNOG00000014597	Irs1	9:88033668-88086488	37.1417	24.6972	0.586118	0.02156	0.343027
ENSRNOG00000000519	Stk38	20:6224296-6257604	17.1252	27.0955	-0.627289	0.0215786	0.343031
ENSRNOG00000023548	Sned1	9:100380515-100440326	15.4001	9.61336	0.662597	0.0215841	0.343031
ENSRNOG00000010730	Efcab10	6:52702544-52709223	0.100821	0	5.8957	0.0216576	0.343629
ENSRNOG00000056714	Sla	7:107584118-107634335	6.51042	11.3947	-0.756085	0.0216915	0.343787
ENSRNOG00000048215	LOC100912489	17:43617247-43617558	388.623	663.645	-0.760377	0.0217961	0.344456
ENSRNOG00000060107	Dnajb14	2:243018975-243151933	31.2135	43.2192	-0.55199	0.0218031	0.344456
ENSRNOG00000032825	LOC100362027	10:38024477-38024937	69.7442	166.647	-1.26955	0.0218056	0.344456
ENSRNOG00000014751	Ret	4:150202058-150244372	1.61293	0.826592	0.962475	0.0218469	0.344731
ENSRNOG00000057220	AABR07060792.3	4:93888313-93888792	0.016437	0.701023	-4.58169	0.0218837	0.345121
ENSRNOG00000012568	Madd	3:79960301-80003032	3.82613	6.01548	-0.65629	0.0219415	0.345654
ENSRNOG00000001227	Adarb1	20:11972381-12101047	7.00357	4.74239	0.562406	0.0220457	0.346788
ENSRNOG00000048182	AABR07051684.1	3:19274273-19274824	0.0512627	1.49813	-4.72214	0.0220575	0.346788
ENSRNOG00000006410	Akap5	6:99356509-99361909	0.092503	0.565374	-2.59554	0.0220618	0.346788
ENSRNOG00000019913	Mta2	1:225140863-225149583	37.4531	54.8561	-0.545157	0.022113	0.347213
ENSRNOG00000026985	Phldb1	8:48997184-49045154	20.9921	15.6949	0.516086	0.0222901	0.349804
ENSRNOG00000001554	RGD1563888	11:17076980-17130120	6.73778	10.4704	-0.63452	0.0223276	0.35001
ENSRNOG00000005687	Slc6a14	X:120624518-120649111	0.010908	0	6.92604	0.0224984	0.352304
ENSRNOG00000004141	Vasn	10:11121041-11131548	35.848	24.1155	0.572519	0.0225423	0.352798
ENSRNOG00000014256	Foxa3	1:79920752-79930263	6.41927	3.12576	1.0327	0.0225549	0.352803
ENSRNOG00000045743	Etnppl	2:235738416-235760352	0.0119717	0	6.93701	0.0226091	0.353459
ENSRNOG00000031440	Nova1	6:66963510-67085852	1.85475	0.889976	0.839115	0.0226797	0.35437
ENSRNOG00000004332	Egfr	14:99919485-100098796	8.16737	5.79894	0.492727	0.0227682	0.355173
ENSRNOG00000018326	Pgls	16:20020444-20025930	7.7858	14.3312	-0.874049	0.0228326	0.355986
ENSRNOG00000017438	AABR07007068.1	1:279207586-279277339	4.50307	2.94862	0.609492	0.0228469	0.356015
ENSRNOG00000042094	Prr13	7:144064931-144098101	35.5607	53.2766	-0.562665	0.0228786	0.356175
ENSRNOG00000059753	Gys2	4:176638629-176679815	0.224363	0.589921	-1.39374	0.0228819	0.356175
ENSRNOG00000056221	AABR07040839.1	X:111735820-111746536	0	0.0811383	-8.41744	0.0229642	0.357101
ENSRNOG00000007271	Map3k9	6:105459706-105518748	0.773155	1.43229	-0.890091	0.0229922	0.357311
ENSRNOG00000021011	Fut2	1:101631635-101651668	3.77164	7.53744	-0.976819	0.0230274	0.357471
ENSRNOG00000049349	Tafa5	7:128500011-128728928	2.08262	0.668133	1.53271	0.0230643	0.357695
ENSRNOG00000022411	RGD1561958	X:83926513-84014691	0.00913167	0	8.51332	0.023085	0.357786
ENSRNOG00000048315	Eif2ak2	6:1428834-1466201	12.9954	6.29721	1.06048	0.0232375	0.359762
ENSRNOG00000007047	Eps8	4:171475567-171591882	6.52883	9.53723	-0.546136	0.0232835	0.360241
ENSRNOG00000003123	Rpa1	10:62140419-62191512	16.7813	28.1472	-0.521811	0.0233016	0.360241
ENSRNOG00000024998	Trps1	7:90090828-90318221	32.063	21.0673	0.598541	0.023306	0.360241
ENSRNOG00000004303	Timp3	7:23544215-23594133	73.7717	50.6739	0.535636	0.0233322	0.360451
ENSRNOG00000015910	Lmntd1	4:179651164-179904844	0	0.00435833	-8.39326	0.0234365	0.361674
ENSRNOG00000015582	Me2	18:69738686-69784099	11.9966	17.4402	-0.536056	0.0234507	0.36168
ENSRNOG00000018524	Ezr	1:47287874-47331412	23.5824	33.754	-0.51116	0.0234717	0.36168
ENSRNOG00000008487	Amotl2	8:111209908-111226226	19.9443	12.4564	0.676344	0.0234759	0.36168
ENSRNOG00000042524	Milr1	10:94944169-94962312	0.852625	3.04357	-1.86408	0.0234998	0.36168
ENSRNOG00000051860	Rnase4	15:28021336-28035389	4.62358	0.71197	2.46955	0.0235598	0.362327
ENSRNOG00000007445	Asph	5:22577675-22799349	15.7779	11.0334	0.550064	0.023567	0.362327
ENSRNOG00000047817	Enox1	15:59678165-59884511	1.36995	0.865494	0.668319	0.0236366	0.362513
ENSRNOG00000052594	Hist1h2ak	17:44840990-44841382	311.041	534.36	-0.764378	0.0236422	0.362513
ENSRNOG00000018454	Apoe	1:80612895-80617057	158.712	107.932	0.565918	0.0237261	0.363341
ENSRNOG00000057072	Slc12a3	19:11106033-11144641	0.068279	0.284891	-1.94974	0.0237526	0.363432
ENSRNOG00000051653	AABR07065772.2	6:140641517-140642294	0.0923507	1.57094	-3.88779	0.0237975	0.363924
ENSRNOG00000029911	Cilp	8:70760922-70775891	11.3613	6.98207	0.701832	0.0238131	0.36397
ENSRNOG00000011141	Serpina11	6:127647184-127656603	0.0292073	0	6.89187	0.0238321	0.364067
ENSRNOG00000053275	AABR07060995.1	4:102402982-102403750	0.154606	2.06575	-3.58438	0.0238695	0.364239
ENSRNOG00000001313	Gnaz	20:14593819-14620019	0.760528	1.64647	-1.10979	0.0238814	0.364239
ENSRNOG00000047118	LOC683897	20:48274952-48340845	4.33076	5.81145	-0.617109	0.0239158	0.36424
ENSRNOG00000004754	Tc2n	6:125437775-125601293	1.31776	0.698929	0.802257	0.0239195	0.36424
ENSRNOG00000049452	Nebl	17:84140489-84488601	15.5443	10.1195	0.614548	0.0239579	0.364266
ENSRNOG00000000583	Cdk19	20:45458558-45598798	10.0142	14.2393	-0.503032	0.0243031	0.368693
ENSRNOG00000029637	Acot6	6:107581608-107590373	0.0281627	0	6.8273	0.0243091	0.368693
ENSRNOG00000045895	Dcp2	18:35489274-35885366	5.59147	4.57104	1.05063	0.0243145	0.368693
ENSRNOG00000012566	Kcnv2	1:245396989-245416531	0	0.0114543	-6.74325	0.0244581	0.370675
ENSRNOG00000023226	S100a10	2:193892589-193901236	153.404	109.439	0.492645	0.0244916	0.370987
ENSRNOG00000002176	Nectin3	11:57897879-57993548	6.29918	4.36385	0.527408	0.024538	0.371494
ENSRNOG00000004642	Lmx1a	13:85917269-86061176	0.672809	0.312151	1.08864	0.0245605	0.371639
ENSRNOG00000056343	Lats2	15:37943609-37983882	10.0227	6.79465	0.559695	0.0246344	0.372366
ENSRNOG00000002428	Lpar4	X:78042859-78056347	4.71976	2.20714	1.08641	0.0246703	0.37261
ENSRNOG00000051235	C2	20:4542340-4561152	42.2156	29.4909	0.5159	0.0246765	0.37261
ENSRNOG00000015354	Aox1	9:64929721-65007870	4.0248	2.45877	0.662805	0.0246956	0.372685
ENSRNOG00000056753	Hectd2	1:255185629-255254307	2.71622	1.0784	1.18142	0.0247321	0.372685
ENSRNOG00000009715	Me1	8:94256839-94368834	32.8236	23.1684	0.501098	0.024751	0.372685
ENSRNOG00000056281	Hist1h2ail1	17:44839721-44840131	208.245	365.043	-0.794688	0.0247573	0.372685
ENSRNOG00000002487	Mbnl3	X:138384912-138435391	3.47573	5.48478	-0.680847	0.0247593	0.372685
ENSRNOG00000046434	Hist1h3b	17:43814773-43815183	413.346	672.406	-0.687592	0.0248323	0.373366
ENSRNOG00000032473	Scn10a	8:128298594-128416650	0.00141133	0.024121	-4.07173	0.0248522	0.373366
ENSRNOG00000000142	Plxdc2	17:83221239-83610272	23.3649	17.9949	0.57532	0.0248574	0.373366
ENSRNOG00000019328	Phgdh	2:200484246-200513564	13.8677	20.3944	-0.549064	0.0248646	0.373366
ENSRNOG00000004766	Glis2	10:11154658-11174861	10.771	6.84001	0.652963	0.0248694	0.373366
ENSRNOG00000020393	Rhog	1:167335248-167347671	24.7013	39.454	-0.615548	0.0248834	0.373381
ENSRNOG00000021166	Ecm1	2:197855460-197860699	15.2887	8.30007	0.876245	0.024999	0.374388
ENSRNOG00000010557	Smarcd2	10:94451866-94460732	28.7797	44.2126	-0.608822	0.0250026	0.374388
ENSRNOG00000042471	RGD1560324	2:149899538-149938782	0.006115	0	6.76298	0.0250026	0.374388
ENSRNOG00000018268	Hhip	19:31524671-31614246	4.68778	3.14367	0.578229	0.0250711	0.375133
ENSRNOG00000019752	Slc29a1	9:17784468-17799005	32.1983	22.3992	0.525667	0.0250815	0.375133
ENSRNOG00000001134	Rfc5	12:44855267-44962684	13.3831	20.6748	-0.605324	0.0252159	0.376602
ENSRNOG00000061237	Dio1	5:126895286-126911520	0.013713	0	6.71554	0.0253534	0.377988
ENSRNOG00000002746	Fstl1	11:65782567-65845418	139.817	99.4806	0.48964	0.0253671	0.377988
ENSRNOG00000019413	Atg16l2	1:166334979-166413564	1.87139	3.60275	-0.872911	0.0254068	0.378273
XLOC_150845	XLOC_150845	KL568415.1:13008-51264	0.157103	0.45296	-1.52759	0.0254515	0.378611
ENSRNOG00000053845	Hist1h2bl	17:44748482-44748862	318.462	533.447	-0.747633	0.0255135	0.37888
ENSRNOG00000024073	Syce1	1:213523639-213534641	0	0.0197117	-6.67456	0.0255575	0.379142
ENSRNOG00000016758	Loxl2	15:51303909-51365234	46.1447	32.9127	0.497164	0.0255711	0.379149
ENSRNOG00000024127	Atp13a5	11:74984613-75124249	0	0.00457967	-8.21218	0.0255857	0.379169
ENSRNOG00000057855	F5	13:82466892-82535534	4.86544	9.22423	-0.745712	0.0256651	0.380151
ENSRNOG00000012051	Ncaph	3:119583648-119611136	12.6808	19.0569	-0.57643	0.025692	0.380299
ENSRNOG00000025332	Cd109	8:85951191-86065409	20.8395	14.1746	0.553229	0.025728	0.380299
ENSRNOG00000057159	Rsl1	2:87018305-87040452	0.853921	2.15818	-1.34537	0.0257294	0.380299
ENSRNOG00000024089	Fndc3b	2:113112902-113345577	51.8477	36.4115	0.507948	0.0258312	0.38103
ENSRNOG00000020337	Sla2	3:152933714-153001309	1.53589	2.83761	-0.906834	0.0258503	0.38103
ENSRNOG00000036865	Krt77	7:143461423-143473783	0	0.0180883	-6.75236	0.0258654	0.38103
ENSRNOG00000007799	Fam151a	5:126334803-126347770	6.87149	3.64895	0.906679	0.0258703	0.38103
ENSRNOG00000042569	AABR07065811.1	6:141987162-142100226	0.0525653	0.887781	-3.87659	0.0259937	0.382456
ENSRNOG00000008079	Ugp2	14:106208176-106248539	38.0081	27.2432	0.480299	0.0260149	0.382572
ENSRNOG00000013141	Eno2	4:157285179-157294047	8.97877	4.7623	0.915227	0.0260443	0.382605
ENSRNOG00000059344	Tpcn1	12:41543696-41566847	15.136	21.9696	-0.555533	0.0260657	0.382605
ENSRNOG00000001315	Rsph14	20:14577166-14653038	0.0135607	0	8.35824	0.0261578	0.383692
ENSRNOG00000011150	Arsb	2:23385183-23544963	88.6249	61.801	0.523214	0.026326	0.385373
ENSRNOG00000031669	Lpp	11:79205730-79703736	11.5586	8.02888	0.521963	0.0264189	0.386536
ENSRNOG00000003476	Slc6a4	10:63153651-63176463	0.214358	0.630266	-1.55492	0.0264415	0.38667
ENSRNOG00000008436	Krt85	7:143161235-143167772	0	0.0343473	-6.72897	0.0264808	0.386852
ENSRNOG00000056550	Epb41l4b	5:74030882-74191167	3.25404	1.87524	0.780888	0.0265103	0.387085
ENSRNOG00000042620	Marveld1	1:261389804-261393736	48.6059	30.3665	0.678352	0.0268572	0.391315
ENSRNOG00000049232	Tcf7l2	1:276659542-276730514	7.98097	5.5312	0.525478	0.0269126	0.391766
ENSRNOG00000028198	Sh2b3	12:40244081-40265757	11.7031	17.1674	-0.552815	0.0271481	0.394595
ENSRNOG00000004314	Ppm1h	7:66843865-67116980	6.46305	4.87414	0.47239	0.0273385	0.39696
ENSRNOG00000027894	Iqgap3	2:187447501-187489630	5.17955	7.72049	-0.56922	0.0274984	0.399081
ENSRNOG00000014297	Sdc4	3:160872503-160891190	76.7401	54.53	0.49469	0.0275827	0.399901
ENSRNOG00000000559	Npffr1	20:31234493-31245955	0	0.0179513	-6.59926	0.0276062	0.40004
ENSRNOG00000005697	Slc6a11	4:146106386-146223228	0.006045	0	8.32009	0.0276826	0.400792
ENSRNOG00000025111	Nfkbid	1:88885937-88892615	0.769056	2.20046	-1.51691	0.027686	0.400792
ENSRNOG00000001757	Tm4sf19	11:71606239-71619167	5.01527	2.61738	0.929638	0.0277333	0.401238
ENSRNOG00000013673	Msh3	2:21790044-21931720	2.97911	4.27116	-0.520678	0.0277447	0.401238
ENSRNOG00000001195	Trpv4	12:47698947-47737902	23.341	16.1672	0.529189	0.0277644	0.40132
ENSRNOG00000055340	Ski	5:172559135-172623899	34.1618	24.2697	0.490984	0.0277933	0.401344
ENSRNOG00000048167	AABR07051551.1	3:16610086-16884018	0.792791	3.45674	-2.08321	0.027794	0.401344
ENSRNOG00000028368	Etnk2	13:50481163-50499140	6.01525	3.29072	0.860835	0.0278392	0.401532
ENSRNOG00000003622	Cybb	X:14578264-14612547	19.4634	32.0708	-0.703092	0.0278628	0.401532
ENSRNOG00000014317	Arpc5l	3:23297922-23318032	7.74611	8.58127	-0.976068	0.027902	0.401712
ENSRNOG00000001276	Pcnt	20:12944616-13038431	5.68659	8.46588	-0.510439	0.0279033	0.401712
ENSRNOG00000006940	Ncf4	7:119482272-119499425	5.87743	10.341	-0.803544	0.0279218	0.401778
ENSRNOG00000002407	Pdxdc1	10:3218360-3321412	18.9905	13.4102	0.526947	0.0280496	0.402639
ENSRNOG00000053103	AABR07065705.2	6:139636894-139784372	0.196506	2.06107	-3.29844	0.0280517	0.402639
ENSRNOG00000026918	RGD1308065	11:88128756-88145984	0.467493	1.26264	-1.41792	0.0281663	0.403965
ENSRNOG00000005958	Rrbp1	3:138055240-138116664	84.8036	59.0892	0.520056	0.0281721	0.403965
ENSRNOG00000034287	AABR07035916.1	12:27153926-27647036	3.29874	1.9925	0.773045	0.02833	0.40542
ENSRNOG00000016050	Fgfr1	16:71266248-71319449	89.5902	64.1666	0.475556	0.0283803	0.405937
ENSRNOG00000009789	Topbp1	8:111790678-111827151	10.074	14.4919	-0.519479	0.0284103	0.406164
ENSRNOG00000039439	RGD1560723	5:58966045-58975615	0.148894	1.55741	-3.59928	0.0284996	0.407014
ENSRNOG00000019854	Napsa	1:100577056-100589836	10.3067	20.1646	-0.94592	0.0285782	0.407609
ENSRNOG00000014644	Zic1	8:98734295-98738446	0	0.026266	-5.7372	0.0285823	0.407609
ENSRNOG00000054426	Zfp704	2:94377072-94551529	8.65454	6.20683	0.477177	0.0287708	0.409485
ENSRNOG00000042455	Tlr12	5:146791198-146795866	0.002739	0.0782417	-4.25435	0.0288121	0.409667
ENSRNOG00000007879	Stk26	X:138046494-138096669	23.4399	16.1658	0.534739	0.0288437	0.409915
ENSRNOG00000001692	Chaf1b	11:34101197-34121378	4.79518	7.69676	-0.679628	0.0291338	0.412609
ENSRNOG00000003999	Adcy3	6:28571351-28650148	6.35408	4.42736	0.521754	0.0291501	0.412637
ENSRNOG00000010386	H2ax	8:48665652-48674672	213.982	319.614	-0.567986	0.0292267	0.413518
ENSRNOG00000056970	AABR07063425.3	6:30638738-30643594	0.334864	0.001076	6.96192	0.0293042	0.414003
ENSRNOG00000001249	Col6a1	20:12658065-12675561	232.784	165.663	0.488818	0.0293295	0.414048
ENSRNOG00000042721	Gimd1	2:237679792-237714428	0.019305	0	8.24437	0.0296076	0.416461
ENSRNOG00000024250	Wwc3	X:24891156-24988741	7.63788	5.38666	0.502977	0.0296085	0.416461
ENSRNOG00000014182	Tns1	9:81179872-81437699	28.1119	19.8539	0.4932	0.0296843	0.417322
ENSRNOG00000018405	Apoc4	1:80595326-80599572	0	0.043896	-6.5177	0.0297653	0.418122
ENSRNOG00000014367	Ephb6	4:70903253-70918514	0.925505	2.17353	-1.23835	0.0298437	0.418949
ENSRNOG00000046976	AABR07017831.1	15:31618297-31618830	0	0.17983	-5.63754	0.0298895	0.419386
ENSRNOG00000012378	Dbnl	14:86029335-86044364	17.1668	25.2373	-0.55076	0.0299389	0.41967
ENSRNOG00000018525	Slc4a9	18:29352749-29365595	0.0158587	0	6.57073	0.0299772	0.420002
ENSRNOG00000014863	Reck	5:59348639-59415135	20.1817	13.8362	0.542239	0.0300455	0.420549
ENSRNOG00000006328	Wwp1	5:33609136-33664435	13.8214	9.81376	0.494663	0.030082	0.420856
ENSRNOG00000042978	Ncald	7:76199306-76488216	3.37407	2.41585	0.483531	0.0301218	0.421061
ENSRNOG00000008332	Smo	4:57019941-57042770	20.4015	13.7745	0.564758	0.030126	0.421061
ENSRNOG00000019615	Colq	16:7627603-7681576	0.0703137	0.270208	-1.93296	0.030143	0.421094
ENSRNOG00000009390	Edn2	5:139100898-139105792	0.13332	0	8.20496	0.030257	0.421633
ENSRNOG00000004688	Rbfox2	7:118156946-118396728	12.9466	9.20039	0.487178	0.0302635	0.421633
ENSRNOG00000013884	Psd3	16:23447366-23781604	13.3451	8.95587	0.569833	0.0303082	0.421633
ENSRNOG00000017673	Brsk1	1:72701610-72727112	3.98823	2.26739	0.814611	0.0303111	0.421633
ENSRNOG00000019459	Oaz1	7:11752412-11754508	298.293	422.745	-0.497578	0.0303136	0.421633
ENSRNOG00000020235	Hnrnpl	1:86996093-87006776	88.3642	124.039	-0.485502	0.03038	0.422353
ENSRNOG00000016874	Zfp521	18:5032029-5314585	13.844	9.48418	0.624009	0.0304246	0.422768
ENSRNOG00000058130	Pym1	7:3173287-3193994	11.7719	18.1427	-0.594621	0.0304738	0.423185
ENSRNOG00000037563	Cd68	10:56249548-56270640	56.1043	40.3206	0.480635	0.0305423	0.423185
ENSRNOG00000032844	RT1-Da	20:4127644-4132616	5.22431	12.5479	-1.27455	0.0305504	0.423185
ENSRNOG00000015810	Trip13	1:31967978-32012919	5.25624	7.78471	-0.589476	0.0305522	0.423185
ENSRNOG00000043039	LOC691162	5:162351001-162369990	0.0312157	0	8.17174	0.030565	0.423185
ENSRNOG00000003661	Jpt1	10:104057697-104075777	19.9544	28.4125	-0.504577	0.0306027	0.423203
ENSRNOG00000029776	AABR07065823.1	6:142992767-142993300	0.028814	0.737308	-4.27959	0.0306082	0.423203
ENSRNOG00000011497	Aldh1b1	5:61382351-61387358	0.249543	1.01191	-2.01178	0.030634	0.423223
ENSRNOG00000006997	App	11:24425005-24641858	147.906	105.78	0.479291	0.0307025	0.423762
ENSRNOG00000049470	Tex12	8:54992841-54994871	0.102242	0	6.66527	0.0307303	0.423943
ENSRNOG00000031203	Scfd1	6:72124417-72202713	17.9942	13.0185	0.468431	0.0307704	0.424221
ENSRNOG00000030149	Adgrl3	14:28393394-28967980	2.62769	1.81475	0.535394	0.0309013	0.425157
ENSRNOG00000038832	AABR07064415.1	6:80188943-80201550	0.015231	0	6.53072	0.0309239	0.425157
ENSRNOG00000016368	Ppp1r14c	1:39811314-39923057	1.88472	0.676949	1.50825	0.0309372	0.425157
ENSRNOG00000047204	Gp6	1:73040901-73064641	0.438735	1.09975	-1.31201	0.0309942	0.425338
ENSRNOG00000013069	Sapcd2	3:2591331-2596583	3.7001	7.90336	-1.08587	0.031014	0.425353
ENSRNOG00000021924	Cyp2c22	1:259257657-259287684	0.021255	0	8.17808	0.0310734	0.425816
ENSRNOG00000037409	Scimp	10:57415832-57436368	0.217837	0.682952	-1.64535	0.0311258	0.42633
ENSRNOG00000000488	Hmga1	20:7132494-7142447	4.33469	9.01823	-1.11417	0.0311453	0.426394
ENSRNOG00000003672	Enam	14:21194664-21219454	0	0.00781733	-6.51045	0.0311776	0.42643
ENSRNOG00000004693	Pbx1	13:86390741-86451002	9.31186	6.61625	0.505744	0.0313134	0.428084
ENSRNOG00000006503	Frmd3	5:90040495-90282327	0.241402	0.118083	1.02317	0.0313459	0.428325
ENSRNOG00000038819	RGD1564308	16:49485256-49509767	0.152644	0.0332837	2.1925	0.0315005	0.429417
ENSRNOG00000056457	Gpd1	7:141370491-141377928	50.1807	32.8236	0.622247	0.0315398	0.429719
ENSRNOG00000014872	Sec24d	2:227455722-227562319	44.4904	32.1514	0.46947	0.0315526	0.429719
ENSRNOG00000014125	Evi2b	10:66856980-66865806	6.45488	12.1296	-0.897111	0.0315887	0.429975
ENSRNOG00000011944	Snx10	4:81311490-81374158	28.2859	20.376	0.475963	0.0316013	0.429975
ENSRNOG00000017976	Slco2b1	1:164623599-164671577	9.7198	6.62475	0.549273	0.0316491	0.430421
ENSRNOG00000047613	AABR07048463.1	5:77744450-77749613	0.332862	0.011245	4.7372	0.0316844	0.430699
ENSRNOG00000011752	Sh3d19	2:185268259-185431354	15.9536	11.2	0.480196	0.0317605	0.431273
ENSRNOG00000042711	AABR07072264.1	11:86917667-86920094	0	0.0375767	-5.50906	0.0317717	0.431273
ENSRNOG00000009514	Mme	2:153803349-153880738	20.7671	14.598	0.50918	0.0318048	0.431519
ENSRNOG00000025297	Gpr171	2:149317697-149325926	0.319968	1.09081	-1.77404	0.0318641	0.432119
ENSRNOG00000056553	Rdh12	6:102392828-102405750	0.166968	0.607316	-1.84279	0.0319903	0.433626
ENSRNOG00000008116	Plpp3	5:124690214-124765498	27.1391	19.6664	0.463474	0.032012	0.433715
ENSRNOG00000002191	LOC498368	14:46050371-46134805	0.824246	0.421812	0.957092	0.0320817	0.434456
ENSRNOG00000047363	Kcnk13	6:123973521-124077197	1.1601	0.602197	0.881566	0.032109	0.434554
ENSRNOG00000016177	Scara3	15:42605473-42638392	34.1436	24.691	0.468821	0.0321192	0.434554
ENSRNOG00000007286	Mdm1	7:61165640-61200879	5.00422	8.09475	-0.705024	0.0322268	0.435577
ENSRNOG00000052070	Aldh1a3	1:127301128-127337882	6.03162	9.01915	-0.585895	0.0324198	0.43722
ENSRNOG00000014312	AC109737.1	4:70824110-70830514	0.411871	2.07635	-2.64662	0.0324227	0.43722
ENSRNOG00000002878	Afm	14:19078680-19132208	0.0104827	0	8.09332	0.0324514	0.437401
ENSRNOG00000012708	Ptchd4	9:21141077-21338582	0.097229	0.0343987	1.51659	0.0324917	0.437739
ENSRNOG00000039517	Zpld1	11:47924970-47957218	0.0189983	0	8.12277	0.0325702	0.438592
ENSRNOG00000009577	Ndst4	2:229196616-229496516	0.00186467	0	8.07983	0.0327134	0.440279
ENSRNOG00000038251	AABR07002623.1	1:77782825-77843990	5.75861	8.62151	-0.58061	0.0328155	0.441069
ENSRNOG00000001439	Srrm3	12:23855400-23925741	0	0.00715233	-7.86599	0.0329111	0.442052
ENSRNOG00000004602	Rnf145	10:30169257-30207498	17.1814	23.8852	-0.47312	0.0329194	0.442052
ENSRNOG00000036726	Cd300e	10:103599103-103619083	0.292803	0.877374	-1.5786	0.0330877	0.444105
ENSRNOG00000049361	Gas7	10:54126486-54236476	11.2123	16.2756	-0.553224	0.0331327	0.444501
ENSRNOG00000029330	Ca5b	X:32232142-32292072	4.7514	3.10189	0.621989	0.0333257	0.446882
ENSRNOG00000009620	Cybrd1	3:57718364-57746097	9.66197	6.52011	0.567666	0.0333756	0.447234
ENSRNOG00000061085	Fancd2	4:145489869-145551479	6.98255	10.1556	-0.530292	0.0333986	0.447234
ENSRNOG00000021839	Cep126	8:6255850-6305033	0.757697	0.256684	1.38536	0.0334466	0.447386
ENSRNOG00000022239	Trarg1	10:63471331-63491713	13.508	8.43332	0.692458	0.0334637	0.447386
ENSRNOG00000025344	Enthd1	7:121669373-121783435	0	0.00462333	-7.93833	0.0334723	0.447386
ENSRNOG00000005883	Nek10	15:11632759-11812485	0.325673	0.599949	-0.870936	0.0335545	0.447859
ENSRNOG00000001066	Itih2	17:72160735-72195509	0	0.013967	-7.82186	0.0335699	0.447859
ENSRNOG00000005574	Adamts8	8:32018560-32037531	1.57109	0.626832	1.33388	0.033599	0.448038
ENSRNOG00000048961	Bhlhe41	4:180226777-180235137	12.3622	5.69544	1.00282	0.0336863	0.448786
ENSRNOG00000013243	Fndc11	3:176721827-176725837	0	0.044785	-6.43998	0.0338564	0.450844
ENSRNOG00000037298	RGD1309036	1:100346096-100359511	0.00358033	0.0665167	-3.95935	0.0338863	0.451034
ENSRNOG00000048723	Pros1	7:1206648-1288134	14.6896	10.6662	0.461459	0.0340534	0.452628
ENSRNOG00000023257	Adamts9	4:124660262-124858250	12.3309	8.9602	0.463922	0.0340751	0.452707
ENSRNOG00000027002	NEWGENE_1310139	2:32859856-33025271	1.79424	0.963671	0.904479	0.0342795	0.455213
ENSRNOG00000007558	Defb36	3:148082790-148091619	0	0.0627083	-7.95799	0.0343042	0.455331
ENSRNOG00000049959	Igsf21	5:158503244-158549496	0	0.0111607	-7.90451	0.0343316	0.455484
ENSRNOG00000014288	Fn1	9:78900103-78969078	390.771	275.456	0.500242	0.0344525	0.456667
ENSRNOG00000061185	LOC102548682	17:43776050-43776460	673.449	1036.56	-0.607758	0.0345342	0.4574
ENSRNOG00000019813	Ppp4c	1:198219054-198225580	30.5643	45.2964	-0.562725	0.0346658	0.458016
ENSRNOG00000034031	Vstm2l	3:154395187-154424625	0	0.0153657	-7.71333	0.0346841	0.458046
ENSRNOG00000019560	Pde2a	1:166534643-166626158	5.41472	7.59464	-0.482479	0.0347812	0.458696
ENSRNOG00000059073	Slamf1	13:90184569-90219217	0.0129473	0.105903	-3.04405	0.0348262	0.45908
ENSRNOG00000007545	Angptl4	7:18627808-18634079	11.5447	6.24412	0.895823	0.0348656	0.459389
ENSRNOG00000001254	Col6a2	20:12773427-12801180	188.726	136.173	0.468532	0.0349238	0.459865
ENSRNOG00000053787	Mdfic	4:42202838-42282496	8.61469	6.14391	0.488317	0.0349412	0.459865
ENSRNOG00000048264	H4f3	17:43797721-43798383	636.264	968.881	-0.592087	0.0349498	0.459865
ENSRNOG00000008428	Drd2	8:53678777-53743642	0.00881567	0	8.02056	0.0350415	0.460154
ENSRNOG00000027540	Fam102b	2:211772128-211831636	5.81884	3.9802	0.545919	0.0350564	0.460154
ENSRNOG00000000614	Bicc1	20:18780605-18940408	11.2182	7.86419	0.477106	0.0351515	0.460235
ENSRNOG00000011826	Lzts1	16:22250470-22306662	0.609756	0.273487	1.15712	0.0351654	0.460235
ENSRNOG00000056537	AABR07021863.1	13:95983809-96101664	0.242014	0.0531227	1.93802	0.035167	0.460235
ENSRNOG00000012002	Iqgap1	1:142525046-142615673	47.7476	66.0427	-0.466431	0.0352067	0.460297
ENSRNOG00000013552	Scd	1:264160129-264172729	289.51	186.851	0.643236	0.0352596	0.460569
ENSRNOG00000004912	Itgav	3:71114100-71202411	43.1575	30.9905	0.475066	0.0352991	0.460876
ENSRNOG00000026136	Tnfaip8	18:44716226-44779914	6.27365	13.7159	-1.06853	0.0353402	0.461105
ENSRNOG00000003581	Pou2f1	13:84083632-84217366	3.81118	5.47315	-0.525969	0.0353487	0.461105
ENSRNOG00000055994	AABR07029741.3	10:48890802-48896422	0	0.085438	-7.77946	0.0353949	0.461299
ENSRNOG00000011589	Camk2d	2:230901126-231132039	9.50969	13.0141	-0.482662	0.0354559	0.461665
ENSRNOG00000011688	Neil3	16:41079444-41138690	0.325342	0.845782	-1.31953	0.0354756	0.461713
ENSRNOG00000022946	Slc22a3	1:48433079-48521256	1.6443	0.972327	0.762222	0.035553	0.462238
ENSRNOG00000048915	Twf2	8:114897011-114909531	9.78858	15.3759	-0.644466	0.0355552	0.462238
ENSRNOG00000030434	Rs1	X:35749957-35777243	0	0.0193233	-7.92292	0.0355642	0.462238
ENSRNOG00000057740	Ccdc148	3:44892219-45210474	0	0.00188533	-7.92292	0.0355846	0.462295
ENSRNOG00000043384	AABR07069803.1	8:40366593-40576179	0.071592	0	7.96709	0.0356484	0.462914
ENSRNOG00000046284	AABR07027451.1	17:31805547-31814175	0.572228	2.59758	-2.0757	0.035689	0.463232
ENSRNOG00000000879	Slc9a6	X:158969053-159045044	5.59651	3.95025	0.527754	0.0357669	0.463698
ENSRNOG00000014166	Smoc2	1:56242346-56374120	64.1305	45.0446	0.509847	0.0357733	0.463698
ENSRNOG00000051528	Ddx11	9:114111580-114132492	2.94143	4.94055	-0.744645	0.0358563	0.464313
ENSRNOG00000004307	Tor3a	13:74252405-74276964	6.99233	4.50388	0.632231	0.0358692	0.464313
ENSRNOG00000029131	AABR07024637.1	16:9772688-9847444	0	0.00697867	-7.90505	0.035886	0.464321
ENSRNOG00000049629	Reep2	18:27632153-27641795	0.216726	0.752962	-1.81298	0.0360316	0.465325
ENSRNOG00000006548	Mrc2	10:93520132-93581296	62.6653	44.6159	0.488629	0.0360545	0.465325
ENSRNOG00000027017	Rnasel	13:71192142-71202625	2.63587	5.12922	-0.9591	0.0360697	0.465325
ENSRNOG00000054080	Cgnl1	8:78126675-78233430	5.96356	4.28376	0.476222	0.0360916	0.465325
ENSRNOG00000000580	Calhm4	20:27575533-27578244	0.062987	0	6.35534	0.0361681	0.465666
ENSRNOG00000042603	Ttc39b	5:101304982-101405656	4.84421	3.45737	0.487299	0.0362148	0.465793
ENSRNOG00000010219	Ralgds	3:7109920-7130548	8.4675	5.48246	0.628895	0.0362393	0.465793
ENSRNOG00000010188	Satb2	9:63456783-63641400	25.7323	18.4603	0.476833	0.0362799	0.465793
ENSRNOG00000007329	Frmd6	6:93281408-93358840	21.6329	15.8731	0.447611	0.0362845	0.465793
ENSRNOG00000002643	Ugdh	14:44479614-44502845	37.3377	26.9267	0.473277	0.036288	0.465793
ENSRNOG00000019050	Ifit1	1:252914476-252959466	78.1849	40.336	0.898636	0.0363036	0.465793
ENSRNOG00000025587	Plagl1	1:7252349-7259035	55.924	35.9044	0.636412	0.0363236	0.465793
ENSRNOG00000047821	Smlr1	1:20856187-20877716	0	0.0231677	-7.85009	0.0363534	0.465793
ENSRNOG00000003148	Timp2	10:107338465-107386072	123.97	90.7816	0.449879	0.0364016	0.466167
ENSRNOG00000001872	Lrrc74b	11:87418205-87434482	0	0.0268283	-7.66416	0.0364196	0.46619
ENSRNOG00000016419	Pdlim5	2:247818243-247988462	21.5855	15.5757	0.46418	0.0364766	0.466616
ENSRNOG00000005451	Dnah11	6:145739850-146099053	0.212844	0.553146	-0.998572	0.0364853	0.466616
ENSRNOG00000029768	Ccl12	10:69476775-69478462	0.369181	0.0172113	4.24323	0.0365299	0.466666
ENSRNOG00000004810	Plcb1	3:128155069-128419545	4.09672	2.77523	0.483	0.0365359	0.466666
ENSRNOG00000011250	Inmt	4:85381889-85386231	0.644953	0.112366	2.50991	0.0365482	0.466666
ENSRNOG00000042747	Fam72a	13:48287269-48309449	1.62657	3.64697	-0.885983	0.0365673	0.466666
ENSRNOG00000030091	Dusp14	10:71363688-71383602	2.99689	1.57008	0.934419	0.0365704	0.466666
ENSRNOG00000010461	Gpx8	2:44903337-44911875	49.7799	34.1031	0.542553	0.0366529	0.467073
ENSRNOG00000017751	Arl6ip1	1:187770160-187779675	41.9919	61.8305	-0.570466	0.0366815	0.467073
ENSRNOG00000007441	Klhl32	5:38972724-39215174	1.33954	0.492474	1.28143	0.03675	0.467333
ENSRNOG00000024711	Sdk2	10:102303028-102576878	17.5063	12.239	0.503946	0.0368036	0.467773
ENSRNOG00000021695	Hyal6	4:52129556-52142243	0.0138403	0	6.3575	0.0369828	0.46949
ENSRNOG00000017749	Nkg7	1:98492828-98493978	14.9021	40.4246	-1.40499	0.0370805	0.470254
ENSRNOG00000043293	Dppa1	10:31693219-31712924	0.0270877	0	7.92679	0.0371694	0.470758
ENSRNOG00000020368	Fbxl12	8:21656639-21661259	5.33578	10.4687	-0.971096	0.0372279	0.471291
ENSRNOG00000002947	Dpt	13:83073544-83102401	16.5464	10.7838	0.605678	0.0372546	0.471422
ENSRNOG00000019843	St3gal3	5:136766208-136965191	5.97355	4.28794	0.475614	0.0372981	0.471652
ENSRNOG00000048933	LOC691918	3:112371677-112377706	0.101857	0	7.89312	0.0373056	0.471652
ENSRNOG00000003590	Tom1l2	10:46602231-46720910	15.6856	11.2864	0.477436	0.0373449	0.471733
ENSRNOG00000045949	Faah	5:134852875-134871775	0.0163867	0.157727	-3.19355	0.0373739	0.471893
ENSRNOG00000017671	Rasa3	16:81318633-81434363	16.9416	23.0364	-0.46702	0.0374182	0.472088
ENSRNOG00000025460	Tmem71	7:107262929-107393490	1.85195	3.97193	-0.984953	0.0374222	0.472088
ENSRNOG00000019556	Cd9	4:157977162-158010166	110.602	79.5149	0.478936	0.037545	0.473036
ENSRNOG00000040013	Rhox2	X:123887988-123993542	0.0118253	0	7.89187	0.0375467	0.473036
ENSRNOG00000007202	Sema3d	4:19224310-19413484	17.8528	12.4023	0.519626	0.0377357	0.474585
ENSRNOG00000002414	Tfcp2l1	13:34610684-34670124	0.899069	0.359047	1.14846	0.0377528	0.474592
ENSRNOG00000056411	Hist1h2an	17:44520537-44520929	250.479	426.194	-0.749564	0.0377966	0.474919
ENSRNOG00000017703	Unc93b1	1:219140658-219183963	13.6821	21.2485	-0.609628	0.0378549	0.475252
ENSRNOG00000018850	Ttc9b	1:84470829-84473011	0	0.0766013	-6.31811	0.0378725	0.475265
ENSRNOG00000028247	Ankrd13d	1:219520075-219532609	0.397644	1.10184	-1.47506	0.0379837	0.476246
ENSRNOG00000054475	AABR07068007.2	9:76913639-77006527	0.005654	0	7.89412	0.038054	0.476754
ENSRNOG00000043201	Coq8a	13:98451637-98480419	9.77097	15.4548	-0.662264	0.0381526	0.477322
ENSRNOG00000046261	Acp5	8:23142734-23148396	911.16	637.77	0.516537	0.0381734	0.477376
ENSRNOG00000059097	AABR07025140.1	16:29834086-29936307	2.39945	0.842708	1.54312	0.0382563	0.477788
ENSRNOG00000010301	Eif4e3	4:132048998-132114684	3.17344	5.34162	-0.88861	0.0383712	0.47832
ENSRNOG00000007036	Tgfbr1	5:63050758-63119635	20.0421	12.4535	0.672503	0.0383948	0.47832
ENSRNOG00000031675	Panx3	8:40126342-40137390	45.0003	60.7752	-0.475214	0.0384091	0.47832
ENSRNOG00000038083	Wdr64	13:93751759-93874105	0.003968	0	7.79285	0.0384459	0.47832
ENSRNOG00000013203	LOC312273	4:69190485-69196430	0.082123	0	7.79285	0.0384484	0.47832
ENSRNOG00000058742	AABR07067023.1	9:26636334-26707571	0.00643033	0	7.79611	0.0384758	0.47832
ENSRNOG00000002174	Cwh43	14:37315406-37361798	0.00990167	0	7.79611	0.0384786	0.47832
ENSRNOG00000020644	Nsg2	10:15867887-15928169	1.06749	1.82003	-0.772082	0.0385111	0.47832
ENSRNOG00000015916	Ttc38	7:126711467-126735007	2.42318	4.20949	-0.783593	0.0385163	0.47832
ENSRNOG00000003831	Tdp1	6:123897956-123963675	2.45083	3.66007	-0.57916	0.0386015	0.478835
ENSRNOG00000001457	Rfc2	12:25130377-25143480	12.1303	18.1409	-0.574475	0.0386066	0.478835
ENSRNOG00000018494	Ppp1r3c	1:255371810-255376833	9.59468	4.83422	0.989043	0.0386347	0.47885
ENSRNOG00000056915	Ptprq	7:49763657-50034932	0.001881	0	7.86071	0.0386458	0.47885
ENSRNOG00000056495	AABR07065676.1	6:139177200-139205203	0.50634	3.21085	-2.60818	0.0386593	0.47885
ENSRNOG00000019614	Ptpn22	2:206342066-206396167	2.41676	4.0097	-0.768668	0.0386928	0.47885
ENSRNOG00000019592	Iqca	9:97183214-97290639	0.00462467	0	7.75782	0.0387065	0.47885
ENSRNOG00000027971	Lrrc31	2:116313591-116344137	0.0565893	0.00586033	3.18837	0.0387244	0.47885
ENSRNOG00000055404	AABR07012826.1	2:209661244-209779614	0.453241	0.890868	-0.968929	0.0387633	0.479125
ENSRNOG00000011151	Tenm4	1:161401527-161880923	1.79192	1.30475	0.462091	0.0388726	0.47996
ENSRNOG00000010780	Dlc1	16:59077574-59247754	21.0833	15.4365	0.450788	0.0388956	0.47996
ENSRNOG00000052157	Nav3	7:52165233-52509905	2.7874	1.79833	0.567961	0.0389304	0.47996
ENSRNOG00000012826	Creb3l2	4:64869026-64981384	36.3547	25.6412	0.501472	0.038944	0.47996
ENSRNOG00000018160	Zswim5	5:135735825-135860209	4.8709	7.14449	-0.557432	0.0389528	0.47996
ENSRNOG00000012543	Mcm3	9:26914057-26932201	34.1418	48.4935	-0.49756	0.0389644	0.47996
ENSRNOG00000004904	Pa2g4	7:2979588-2987055	55.6867	78.4543	-0.487523	0.0389848	0.480005
ENSRNOG00000012207	Dst	9:37902303-38196273	19.5707	13.8254	0.496278	0.0390315	0.480374
ENSRNOG00000000138	Glis1	5:127160495-127233078	0.945621	0.505254	0.907069	0.0390996	0.481007
ENSRNOG00000017674	Ctcf	19:37600148-37649673	23.1752	32.0086	-0.459303	0.0392108	0.481559
ENSRNOG00000010960	Ankh	2:80131563-80256954	59.3716	43.5578	0.448079	0.0392414	0.481559
ENSRNOG00000050000	AABR07034739.1	11:86092468-86092779	15.1987	76.1979	-2.26228	0.0392771	0.481559
ENSRNOG00000010959	Klhl25	1:137333881-137418457	11.3499	14.0496	-0.695438	0.039284	0.481559
ENSRNOG00000061699	AABR07061022.5	4:102876038-102876328	0.0101673	0.496027	-4.29436	0.0393066	0.481559
ENSRNOG00000059645	AABR07054705.2	3:167219093-167233353	0.051974	0	7.80907	0.0393155	0.481559
ENSRNOG00000007110	Ankrd6	5:48052401-48194294	0.663922	1.08797	-0.672425	0.0393373	0.481559
ENSRNOG00000060408	AABR07051716.1	3:20007005-20007494	0.0597937	1.29226	-4.12661	0.0393504	0.481559
ENSRNOG00000016460	Clu	15:42640146-42665857	47.9239	33.1283	0.544778	0.0393746	0.481559
ENSRNOG00000015288	Dip2c	17:63635086-63808464	5.28742	3.79127	0.47543	0.039379	0.481559
ENSRNOG00000032878	Cxxc5	18:28626366-28660992	12.3307	17.0964	-0.680166	0.0394175	0.481826
ENSRNOG00000016552	Hmgcs1	2:52431601-52445055	29.5732	20.8829	0.502056	0.0394505	0.482024
ENSRNOG00000001011	Rflna	12:37038733-37047628	16.5731	9.14653	0.860549	0.0396062	0.482759
ENSRNOG00000054404	LOC685716	11:60253608-60275464	0	0.0211513	-7.54251	0.0396334	0.482759
ENSRNOG00000000869	Arhgef6	X:159723866-159841072	6.15507	8.5633	-0.472879	0.0396602	0.482759
ENSRNOG00000047076	Oas1g	12:41155497-41167505	1.23337	0.279603	2.12002	0.0396774	0.482759
ENSRNOG00000022660	Ccdc73	3:94848823-94986263	0.00337567	0	7.72192	0.0397297	0.482972
ENSRNOG00000007931	Gucy2d	10:55835695-55851235	0	0.0101413	-6.24306	0.0397488	0.483
ENSRNOG00000050655	P4ha1	20:28920616-28971966	113.425	81.6511	0.474315	0.0397785	0.483156
ENSRNOG00000018090	Ppp6r1	1:72756809-72784482	30.1212	43.4811	-0.525221	0.0398986	0.48441
ENSRNOG00000056716	Zbtb20	11:62014925-62451184	18.6224	12.9894	0.589072	0.0399899	0.485109
ENSRNOG00000001245	Pcbp3	20:12429315-12629981	1.77348	2.55467	-0.523071	0.0400613	0.485429
ENSRNOG00000049385	Adamtsl4	2:197803584-197814808	9.32733	5.47718	0.76421	0.0400669	0.485429
ENSRNOG00000007518	Nckap1	3:67725947-67787990	36.1879	26.4874	0.449058	0.0402882	0.487494
ENSRNOG00000050258	Ccnd3	9:15404822-15410943	88.836	126.187	-0.496364	0.0404847	0.488843
ENSRNOG00000000529	Pim1	20:8165307-8169555	47.5624	74.5552	-0.634399	0.0407066	0.491316
ENSRNOG00000004917	Rasal2	13:74771522-75066812	6.07435	4.38347	0.467779	0.0407907	0.491965
ENSRNOG00000028236	RGD1309104	13:69265649-69385074	19.7718	14.4815	0.451722	0.0408166	0.492024
ENSRNOG00000046905	Sgce	4:29726146-29778039	10.9497	7.74213	0.502343	0.0408576	0.492312
ENSRNOG00000016576	Carmil1	17:43050789-43339403	6.33573	4.65273	0.447324	0.0409195	0.492644
ENSRNOG00000030930	Samsn1	11:14253848-14304725	1.75681	2.84832	-0.707965	0.0409822	0.49287
ENSRNOG00000053397	Fmr1nb	X:154631547-154653758	0	0.0183397	-7.57965	0.0409835	0.49287
ENSRNOG00000029205	Zfp354c	10:36307670-36323055	11.9639	7.77335	0.68107	0.0410305	0.492948
ENSRNOG00000011203	Farp1	15:106434177-106625837	12.6996	9.22058	0.460042	0.0411618	0.493981
ENSRNOG00000015520	Ticrr	1:141391262-141433109	5.40797	7.91327	-0.541015	0.0411644	0.493981
ENSRNOG00000016812	Adamts16	1:35067490-35198939	0.523855	0.271822	0.944681	0.0411679	0.493981
ENSRNOG00000051694	AABR07065651.6	6:138744049-138744480	0.0378313	1.19343	-4.41793	0.0413716	0.495747
ENSRNOG00000050794	Pdlim4	10:39390581-39405311	10.6516	6.88189	0.634581	0.0413765	0.495747
ENSRNOG00000006025	Lamb3	13:112031594-112073186	0.877079	0.399959	1.12399	0.0413889	0.495747
ENSRNOG00000006649	Thrb	15:8890578-9086282	5.36237	3.83735	0.478755	0.0414013	0.495747
ENSRNOG00000060572	Tlk1	3:57013025-57119234	9.80014	4.31932	0.942213	0.0414551	0.495978
ENSRNOG00000042411	Rps6ka1	5:152078220-152122684	12.2833	20.7933	-0.657339	0.0418239	0.499621
ENSRNOG00000050561	AABR07065821.1	6:142791766-142880382	0.0821243	1.02291	-3.59209	0.0418292	0.499621
ENSRNOG00000009832	Slc39a14	15:51982982-52029816	27.6551	19.9106	0.472861	0.0418661	0.499854
ENSRNOG00000030914	Lexm	5:126196071-126221916	0.050774	0.20635	-1.99302	0.0419523	0.500067
ENSRNOG00000007980	Anxa13	7:98217642-98270110	0	0.00766267	-7.55806	0.0419644	0.500067
ENSRNOG00000008658	Mitf	4:130172727-130425532	4.61235	3.03743	0.572336	0.0419757	0.500067
ENSRNOG00000006899	Akap14	X:123773430-123788898	0.009575	0	6.18394	0.0419816	0.500067
ENSRNOG00000014613	Ddah1	2:251634431-251766014	16.9156	12.3442	0.458524	0.0420012	0.500067
ENSRNOG00000010680	Med12l	2:149213134-149532292	3.50357	4.77064	-0.505462	0.0420118	0.500067
ENSRNOG00000020804	Smarcc1	8:118206698-118325537	24.3318	32.6692	-0.442816	0.0420844	0.500067
ENSRNOG00000018051	Farp2	9:100660034-100767940	11.0276	7.71173	0.474196	0.0420879	0.500067
ENSRNOG00000039091	Pnpla8	6:64224861-64286785	22.393	15.3144	0.584051	0.0420926	0.500067
ENSRNOG00000048472	Comp	16:20798437-20807070	329.276	483.815	-0.571431	0.0421754	0.500812
ENSRNOG00000028404	Ppp1r1b	10:86303727-86312762	25.6246	15.844	0.692445	0.0421902	0.500812
ENSRNOG00000042848	Jam2	11:24266345-24285275	20.9522	14.8349	0.496743	0.0423612	0.501989
ENSRNOG00000013426	Mrgprf	1:218466289-218476224	4.63784	2.35535	0.972404	0.0423723	0.501989
ENSRNOG00000033192	Osmr	2:56110777-56151531	4.64936	3.04015	0.611334	0.0423885	0.501989
ENSRNOG00000009912	Fgr	5:151172206-151199745	9.35051	15.6275	-0.728386	0.0423907	0.501989
ENSRNOG00000014117	Hmox1	19:14508616-14515456	54.3129	36.8402	0.573181	0.042427	0.502172
ENSRNOG00000056596	Alas1	8:114927722-114940177	12.2575	19.4034	-0.654086	0.0424573	0.502324
ENSRNOG00000013340	Twsg1	9:113699170-113732622	26.0472	19.0041	0.45522	0.042531	0.50299
ENSRNOG00000001851	Far2	4:182483194-182565436	0.588668	1.38507	-1.19947	0.0425765	0.503321
ENSRNOG00000014264	AABR07027306.1	17:23661429-23761079	0.670907	1.09565	-0.705909	0.0426369	0.503827
ENSRNOG00000047577	AABR07065656.2	6:138948007-138948583	0	0.164203	-5.3387	0.0427383	0.504817
ENSRNOG00000002538	Epb41l5	13:35580098-35668968	2.92892	4.90055	-0.749527	0.042788	0.505197
ENSRNOG00000008765	Zfhx4	2:98423569-98610368	8.28772	6.03644	0.454469	0.0428855	0.505725
ENSRNOG00000018669	Jak3	16:20109200-20120668	3.21873	5.93188	-0.876559	0.0429434	0.505832
ENSRNOG00000020871	Ltbp4	1:84118046-84150084	18.1241	12.2738	0.554722	0.042976	0.505832
ENSRNOG00000038921	Tex35	13:74729467-74740458	0.0128423	0	6.16665	0.0429997	0.505832
ENSRNOG00000056141	Matn3	6:34071428-34091048	226.201	159.434	0.502113	0.043008	0.505832
ENSRNOG00000008851	Slc35b4	4:61550995-61573003	11.3103	16.0232	-0.500046	0.0430096	0.505832
ENSRNOG00000056969	AABR07008911.1	2:78282959-78283473	0	0.760187	-7.51388	0.0430417	0.505907
ENSRNOG00000032629	MGC114492	X:139260135-139263974	0.04163	0	6.24455	0.0431488	0.506959
ENSRNOG00000016398	Clstn1	5:166533181-166601684	17.7179	12.9892	0.448562	0.0433266	0.508544
ENSRNOG00000028779	Wfdc15b	3:160607056-160608308	0	0.116964	-6.14649	0.0433368	0.508544
ENSRNOG00000029535	Nrbp2	7:117145961-117151694	13.2596	7.41438	0.845136	0.0434212	0.509326
ENSRNOG00000029071	Unc5c	2:247248407-247397483	8.68311	5.87383	0.57546	0.0435204	0.510282
ENSRNOG00000009173	Smad6	8:68898296-68966108	7.06219	5.10507	0.4713	0.0438835	0.51363
ENSRNOG00000053384	Bmp7	3:170879973-170955399	3.60238	2.38911	0.597579	0.0440057	0.514364
ENSRNOG00000010233	Cald1	4:62220736-62291489	33.0143	25.7479	0.472337	0.0440088	0.514364
ENSRNOG00000032812	LOC498308	13:108444220-108460362	0.031231	0	7.58311	0.0440116	0.514364
ENSRNOG00000006715	Ccr1	8:132996649-133002201	11.9597	6.65065	0.842365	0.0441133	0.515342
ENSRNOG00000015594	Rftn2	9:61756428-61810417	14.7062	10.5199	0.483952	0.0441446	0.515498
ENSRNOG00000002278	Tec	14:37918652-38027925	2.11151	3.11508	-0.564147	0.0441788	0.515514
ENSRNOG00000005033	Acvr1	3:44432471-44522930	11.3225	8.253	0.45923	0.0441818	0.515514
ENSRNOG00000004697	Baalc	7:77763512-77837453	1.80669	0.999416	0.793343	0.0442276	0.515766
ENSRNOG00000007089	Lgmn	6:126282233-126320726	59.6219	44.1639	0.437689	0.0442393	0.515766
ENSRNOG00000004639	Traf6	3:91252829-91271607	8.24789	12.2487	-0.569007	0.0442948	0.516205
ENSRNOG00000005248	Slc1a4	14:104581190-104612597	9.22989	6.41489	0.525529	0.0443798	0.516776
ENSRNOG00000061714	Slc14a2	18:74546220-74688551	0.0386597	0.111054	-1.52687	0.0443798	0.516776
ENSRNOG00000001501	Snrpa	1:83999671-84008293	17.8798	26.5906	-0.569298	0.04451	0.517889
ENSRNOG00000012148	Trio	2:80473202-80667481	9.74819	7.15437	0.443771	0.0445115	0.517889
ENSRNOG00000029197	Diablo	12:38490230-38503330	23.2559	32.6056	-0.486671	0.0446161	0.518687
ENSRNOG00000046639	Itgae	10:59539405-59711874	2.14035	1.18759	0.83687	0.0446963	0.51941
ENSRNOG00000003925	Hhat	13:111234745-111488602	3.0335	1.83803	0.792842	0.0448118	0.520121
ENSRNOG00000007302	Fbn1	3:117569697-117766120	51.0523	36.2097	0.492242	0.0448942	0.520736
ENSRNOG00000033209	Bmp8b	5:140803638-140820628	0.33526	0.0435957	2.97372	0.044901	0.520736
ENSRNOG00000043120	AC096317.1	1:262023406-262047332	0	0.0166267	-7.51533	0.0450023	0.52086
ENSRNOG00000002959	Shroom4	X:16719803-16929907	3.25686	2.39029	0.444486	0.0451129	0.52193
ENSRNOG00000024330	Ngp	8:118662335-118665699	42.6567	97.7337	-1.15602	0.0452076	0.522754
ENSRNOG00000038140	Nsd2	14:82119210-82171480	20.9572	28.9559	-0.458465	0.0452205	0.522754
ENSRNOG00000039924	Triqk	5:26493212-26566370	3.43501	2.32567	0.568882	0.0453803	0.523805
ENSRNOG00000008138	Jhy	8:45083732-45140292	0.0727967	0.537561	-2.89278	0.0453843	0.523805
ENSRNOG00000017637	Fbp2	17:372551-389967	4.3443	2.27135	0.924137	0.0454788	0.524165
ENSRNOG00000032948	Tyk2	8:22124560-22150005	5.15569	7.78397	-0.59176	0.0455931	0.524922
ENSRNOG00000011024	Zdhhc20	15:38109301-38165746	17.6517	12.5133	0.495871	0.0456089	0.524922
ENSRNOG00000021840	Cped1	4:49055988-49360832	9.28703	6.77475	0.482077	0.0456315	0.524972
ENSRNOG00000034258	Xirp2	3:53563194-53658132	6.84867	2.8198	1.26769	0.0456768	0.525134
ENSRNOG00000013932	Rbp2	8:106503504-106527711	0	0.0161427	-7.49159	0.0456821	0.525134
ENSRNOG00000019439	Polr2g	1:224991222-224994653	14.8819	24.8754	-0.736125	0.0459202	0.527029
ENSRNOG00000012508	Slc39a8	2:241029693-241092582	17.5102	12.9537	0.434646	0.0460049	0.52758
ENSRNOG00000020060	Atf5	1:100805829-100810522	42.7697	24.3047	0.77547	0.0462506	0.530186
ENSRNOG00000013017	Arnt2	1:146399217-146556171	1.13955	0.746678	0.610439	0.0463489	0.530889
ENSRNOG00000011668	Nfil3	17:12261102-12276315	3.14153	5.30495	-0.749921	0.0463778	0.530904
ENSRNOG00000056297	Fmnl3	7:140983342-141001993	18.3724	25.4602	-0.468	0.0463872	0.530904
ENSRNOG00000027595	Tfap2e	5:144740956-144761787	0.019171	0	7.50669	0.0464578	0.531289
ENSRNOG00000056701	LOC103695118	8:76422359-76435473	4.79736	1.88246	1.43268	0.046547	0.531725
ENSRNOG00000031387	Dazap1	7:12290402-12311149	39.9242	55.4881	-0.466322	0.0465769	0.531725
ENSRNOG00000015386	LOC100912849	9:15582564-15604100	0.588434	0.190033	1.61093	0.0465866	0.531725
ENSRNOG00000023309	Anks6	5:62640645-62683964	1.16269	0.624877	0.894388	0.0465884	0.531725
ENSRNOG00000001314	Fam20c	12:17913767-17972737	45.5515	33.7926	0.430804	0.0466674	0.532416
ENSRNOG00000002820	LOC24906	10:43871613-43880055	30.1329	61.6509	-0.996512	0.0467052	0.532581
ENSRNOG00000052486	Kcna6	4:159245205-159287193	10.0411	5.65841	0.802292	0.0467189	0.532581
ENSRNOG00000036604	Ifit2	1:252894663-252900726	6.38555	2.81225	1.1738	0.0467847	0.533119
ENSRNOG00000010312	Bhlhe23	3:176279997-176282211	0	0.045509	-5.55278	0.0468188	0.533297
ENSRNOG00000038483	AABR07018323.1	15:51433859-51463718	5.28369	2.95487	0.829347	0.0468668	0.533599
ENSRNOG00000031391	Ceacam16	1:80773819-80783898	0.0133793	0	6.04728	0.0469143	0.533599
ENSRNOG00000013920	Arhgap26	18:31812109-32207801	5.04987	7.40013	-0.530036	0.0469213	0.533599
ENSRNOG00000022792	Lamp3	11:84972132-85000681	0	0.0125667	-7.39714	0.0469316	0.533599
ENSRNOG00000008552	P2rx3	3:72403993-72457679	2.76893	4.46526	-0.694388	0.0469567	0.533599
ENSRNOG00000016679	Tmc7	1:188195416-188245628	0.20911	0.0704753	1.56711	0.0470629	0.534384
XLOC_104451	XLOC_104451	4:28343132-28351048	6.80339	2.33204	1.46852	0.0471451	0.534714
ENSRNOG00000001584	Map3k7cl	11:27208564-27251801	4.25247	2.76117	0.626168	0.0471478	0.534714
ENSRNOG00000001888	Arvcf	11:86736142-86793791	2.55972	5.28126	-1.08194	0.0472234	0.535162
ENSRNOG00000012735	Kif24	5:57780389-57845509	2.19809	3.50391	-0.693704	0.0472246	0.535162
ENSRNOG00000016182	Tgfa	4:117962013-118046344	3.35908	2.27043	0.550793	0.0473908	0.536412
ENSRNOG00000014940	Sfrp5	1:261442108-261446570	36.4688	22.768	0.678233	0.047432	0.536667
ENSRNOG00000059538	Clec2g	4:162934195-162943981	52.8106	80.9472	-0.547545	0.0474842	0.536673
ENSRNOG00000014434	Chd1	1:57692836-57762106	13.7893	20.0161	-0.526093	0.0474871	0.536673
ENSRNOG00000047571	RGD1563231	3:16999132-16999720	1.11276	6.49026	-2.47574	0.0474886	0.536673
ENSRNOG00000005659	Aurkb	10:55626741-55634991	13.8861	24.0263	-0.711173	0.0475917	0.537628
ENSRNOG00000012820	Add3	1:273854248-273961982	7.20997	10.6487	-0.508788	0.0476171	0.537703
ENSRNOG00000001169	Slc37a1	20:10032641-10087688	1.45269	2.48332	-0.805382	0.0477066	0.537999
ENSRNOG00000018683	Dock1	1:206900617-207414843	12.1298	9.01791	0.426907	0.0477619	0.538067
ENSRNOG00000005159	Fam135b	7:112673465-112833083	0.00228467	0	7.46352	0.0477804	0.538067
ENSRNOG00000010983	Otog	1:102258124-102327201	0.165914	0.424426	-1.21211	0.0477974	0.538067
ENSRNOG00000023007	Col6a6	8:114353825-114449956	2.64739	4.19111	-0.672527	0.0478819	0.538404
ENSRNOG00000000875	Fhl1	X:159112880-159172524	46.4704	31.4307	0.586089	0.0478852	0.538404
ENSRNOG00000004900	Crhr1	10:92191718-92232645	0.009483	0	7.46386	0.0479314	0.538635
ENSRNOG00000025219	RGD1559622	2:149715198-149754776	0.009752	0	7.46386	0.0479432	0.538635
ENSRNOG00000002126	Ncam2	11:20471764-20705063	0.0409493	0.00647867	2.65266	0.0479703	0.538729
ENSRNOG00000020918	Ccnd1	1:218090750-218100325	16.1832	10.6034	0.611999	0.0480165	0.538963
ENSRNOG00000045644	LOC684762	17:43807130-43807540	1485.48	2206.75	-0.554743	0.048043	0.538963
ENSRNOG00000020713	Osbpl5	1:216866245-216920625	9.7269	7.08126	0.456418	0.0480474	0.538963
ENSRNOG00000008625	Rimkla	5:138521340-138545404	0.661461	0.25564	1.36642	0.0482241	0.5406
ENSRNOG00000018054	F2rl2	2:26161731-26439058	2.18942	4.00202	-0.753887	0.0482309	0.5406
ENSRNOG00000017606	P2rx1	10:59566223-59581325	1.36985	2.93873	-1.0837	0.0483107	0.540988
ENSRNOG00000052574	AABR07021955.1	13:100431390-100450209	49.288	70.6037	-0.506224	0.0483538	0.540988
ENSRNOG00000051158	Cfb	20:4536212-4542073	5.4519	2.4542	1.15964	0.0483603	0.540988
ENSRNOG00000000164	Lamp2	X:124722628-124766044	44.5553	33.0943	0.432328	0.0483973	0.540988
ENSRNOG00000002724	Prpsap2	10:48008802-48044344	7.73811	11.1283	-0.519633	0.0484676	0.541435
ENSRNOG00000054487	AABR07057675.1	7:83682272-83701447	0.0186973	0	7.44259	0.0484962	0.541435
ENSRNOG00000012937	Wwp2	19:39543242-39614625	56.6221	41.3777	0.453282	0.0485314	0.541435
ENSRNOG00000037449	Pole	12:52403529-52452040	8.21915	11.4789	-0.4748	0.0485874	0.541633
ENSRNOG00000018086	Slc22a8	1:224800252-224818482	0	0.0181027	-7.26325	0.0486057	0.541633
ENSRNOG00000003689	Nono	X:71324365-71342225	54.0544	72.394	-0.439017	0.048679	0.54224
ENSRNOG00000006384	Ddx58	5:56498453-56536772	6.76649	3.36954	0.968553	0.0488603	0.543838
ENSRNOG00000021355	Ca6	5:167226246-167244786	0.116441	0.407097	-1.80585	0.0488938	0.544
ENSRNOG00000015441	Il4r	1:196942364-196967220	6.5328	9.53784	-0.543063	0.0489404	0.544198
ENSRNOG00000003114	B4galt4	11:64557977-64583994	3.81033	2.33984	0.701531	0.0489604	0.544198
ENSRNOG00000011619	Myo9a	8:64573358-64777543	12.5063	8.86946	0.502271	0.0489683	0.544198
ENSRNOG00000048425	AABR07065776.3	6:140879774-140880281	0.627776	4.53553	-2.59328	0.0491304	0.545787
ENSRNOG00000059579	Gpt2	19:22590881-22632071	10.7891	6.52354	0.723207	0.0492274	0.546654
ENSRNOG00000021719	Slfn5	10:70298519-70312070	20.0611	11.8585	0.75477	0.0493406	0.547451
ENSRNOG00000028636	Xkr5	16:75744786-75762693	1.65079	3.05204	-0.879662	0.0493778	0.547451
ENSRNOG00000057484	AABR07001573.2	1:53220397-53286701	0.084736	0.14843	-1.89911	0.0493803	0.547451
ENSRNOG00000058444	LOC100912564	17:44744591-44744902	1466.6	2169.98	-0.549461	0.0494472	0.547825
ENSRNOG00000042137	Sting1	18:28529576-28535828	1.06511	2.6512	-1.31417	0.0495114	0.548326
ENSRNOG00000056665	AABR07065844.1	6:143228835-143230269	0	0.140618	-6.12132	0.049595	0.548483
ENSRNOG00000002571	Tekt5	10:5352933-5389737	0.0102147	0	7.41972	0.049621	0.548483
ENSRNOG00000010260	Dixdc1	8:55091235-55162421	6.66861	4.2518	0.707115	0.0497002	0.549147
ENSRNOG00000056135	Tsc22d3	X:111884295-111887906	21.7931	34.5846	-0.658926	0.049784	0.549458
ENSRNOG00000004263	Ints7	13:110257571-110310413	12.8506	17.5424	-0.442388	0.0498017	0.549458
ENSRNOG00000008170	Jph2	3:159712325-159775643	6.39111	3.90071	0.707634	0.0498231	0.549458
ENSRNOG00000015691	Inka2	2:208170652-208185965	6.53441	3.90229	0.743578	0.0498443	0.549458
ENSRNOG00000062231	AABR07037451.2	X:20484194-21017569	4.97639	3.50296	0.524915	0.0498552	0.549458
ENSRNOG00000050763	AC127013.1	4:154944137-155020169	0.0815223	0	6.08271	0.0498582	0.549458

## Sheet: Dex_14d_vs_Control_14d. mRNA
gene_id	gene_name	gene_locus	Dex_14d_FPKM	Control_14d_FPKM	log2FoldChange	pvalue	padj
ENSRNOG00000053118	LOC103694867	KL568417.1:15968-35620	0	9.43767	-16.3345	2.04e-98	5.83e-94
ENSRNOG00000019660	Spib	1:100530429-100537377	0.321296	66.0218	-7.29785	3.43e-77	4.9e-73
ENSRNOG00000020125	Cd79a	1:81763614-81767980	0.659351	78.7844	-6.79209	2.84e-76	2.71e-72
ENSRNOG00000006170	Bach2	5:47466079-47807166	0.361368	20.0925	-5.63223	3.14e-71	2.24e-67
ENSRNOG00000024729	Pax5	5:60007587-60193713	0.039971	19.3201	-7.87655	3.85e-59	2.2e-55
ENSRNOG00000004630	Rag1	3:91206394-91217491	0.0696023	23.1738	-8.25443	4.07e-57	1.94e-53
ENSRNOG00000003136	Fcrla	13:89296573-89306260	0.423439	36.2769	-6.22567	1.15e-48	4.69e-45
ENSRNOG00000010798	Blk	15:46555188-46593653	0.0193747	10.849	-7.88105	8.81e-42	2.8e-38
ENSRNOG00000049925	Cd79al	9:16793928-16795887	0.68972	70.3098	-6.55258	2.01e-41	5.75e-38
ENSRNOG00000011500	Pou2af1	8:55603968-55631446	0.452215	34.2331	-6.14404	2.9e-41	7.55e-38
ENSRNOG00000025990	Igll1	11:88388378-88391370	0.0107443	28.5048	-11.0948	9.31e-41	2.22e-37
ENSRNOG00000033087	Cdh23	20:29857637-29990111	0.217064	4.06159	-4.1101	6.08e-39	1.34e-35
ENSRNOG00000039357	Niban3	16:20027348-20038716	0.162357	17.1188	-6.58936	5.46e-38	1.12e-34
ENSRNOG00000002626	Car10	10:80790168-81296363	0	0.179023	-14.7469	2.84e-36	5.42e-33
ENSRNOG00000013615	Dntt	1:260289589-260321320	0.322505	15.2322	-5.43243	3.85e-36	6.88e-33
ENSRNOG00000008728	Unc79	6:126874193-127064626	0.0891297	1.75395	-4.19053	9.68e-34	1.63e-30
ENSRNOG00000004623	Rag2	3:91086187-91200134	0.471842	6.14404	-4.12298	1.45e-31	2.31e-28
XLOC_064988	XLOC_064988	18:35949453-35994656	0.981898	0	14.0806	2.19e-31	3.3e-28
ENSRNOG00000007200	Ikzf3	10:86421582-86509454	1.64119	21.1163	-3.5255	4.33e-31	6.19e-28
ENSRNOG00000004998	Jakmip1	14:78424960-78469480	0.021991	2.08349	-6.45787	1.17e-30	1.52e-27
ENSRNOG00000015614	Ppp1r16b	3:155160481-155262941	1.54305	14.1283	-3.09171	4.62e-30	5.76e-27
ENSRNOG00000017485	Cd72	5:58943027-58950373	0.351862	22.9641	-5.89657	7.19e-30	8.58e-27
ENSRNOG00000013967	Blnk	1:260186967-260254600	3.32275	31.0742	-3.11222	6.22e-29	7.13e-26
ENSRNOG00000001165	Tmprss3	20:9910522-9929705	0.083178	7.25793	-6.3714	1.38e-28	1.52e-25
ENSRNOG00000002540	Rhoh	14:43894211-43992587	2.23108	26.0515	-3.65801	1.37e-26	1.4e-23
ENSRNOG00000011917	Cd79b	10:94497448-94500591	0.677249	50.1286	-6.07559	1.52e-26	1.51e-23
ENSRNOG00000061070	Irf4	17:34886739-34905117	0.357875	8.05398	-4.38898	2.66e-26	2.54e-23
ENSRNOG00000028108	Cytl1	14:77805130-77810147	65.4399	4.36971	3.98229	3.27e-26	3.02e-23
ENSRNOG00000060849	LOC102552640	1:222519615-222524779	5.45619	0	13.7097	3.96e-26	3.44e-23
ENSRNOG00000010941	Tifa	2:232016971-232221234	1.37682	14.6432	-3.46501	2.28e-25	1.92e-22
ENSRNOG00000038132	Vsig4	X:65370851-65400298	6.3746	0.221646	4.93133	3.22e-25	2.64e-22
ENSRNOG00000018311	Cd19	1:197815413-197821936	0.0585377	13.4542	-7.70032	3.98e-24	3.17e-21
ENSRNOG00000034190	Ighm	6:138054662-138816066	61.0405	362.751	-2.62331	1.29e-23	9.74e-21
ENSRNOG00000059214	AABR07060963.4	4:101949281-102069277	0	0.414277	-13.5275	3.99e-23	2.93e-20
XLOC_109269	XLOC_109269	5:47460048-47485510	0.0539463	3.62365	-5.85231	8.6e-23	6.16e-20
ENSRNOG00000003054	AABR07037009.1	X:9436707-9467884	1.46721	0	14.3741	3.17e-22	2.16e-19
ENSRNOG00000011133	Trpc4	2:143475323-143604972	0	0.199923	-13.4882	3.7e-22	2.47e-19
ENSRNOG00000030763	Dpp4	3:48291055-48372672	1.76878	14.8514	-2.83358	1.02e-21	6.61e-19
ENSRNOG00000015418	Klhl14	18:12528111-12640716	0.0312603	1.63493	-5.56266	1.54e-21	9.8e-19
ENSRNOG00000005947	Pde6h	4:170947750-170965144	0.0852163	10.0473	-7.13885	4.89e-21	3.04e-18
ENSRNOG00000027392	Ccdc187	3:3697529-3753394	0.00266	2.4765	-10.0881	1.19e-20	7.12e-18
ENSRNOG00000001908	Klhl6	11:84745904-84785893	3.0055	21.3803	-2.71694	7.01e-20	4.1e-17
ENSRNOG00000019549	Akap12	1:40816107-40906581	3.19077	21.3272	-2.67958	1.28e-19	7.31e-17
ENSRNOG00000018735	Cd74	18:56071478-56080849	14.4259	88.8171	-2.52728	3e-19	1.69e-16
ENSRNOG00000010478	LOC299282	6:127941526-128080889	9.69756	0.372873	4.7791	1.59e-18	8.74e-16
ENSRNOG00000045772	LOC100911545	4:154423209-154472924	7.09342	1.27247	2.5816	4.92e-18	2.61e-15
ENSRNOG00000028845	Ebf1	10:23661013-24050209	8.42955	31.6478	-1.84246	1.92e-15	9.5e-13
ENSRNOG00000012160	Syk	17:12612961-12669573	10.1801	39.8579	-2.04147	3.49e-15	1.69e-12
ENSRNOG00000029662	Wdfy4	16:9194424-9430743	4.01379	16.0075	-1.85255	8.8e-15	4.2e-12
ENSRNOG00000008919	Arpp21	8:120323897-120491813	0.447178	3.05951	-2.64038	2.42e-14	1.08e-11
XLOC_009341	XLOC_009341	1:45312632-45342786	0.00115633	0.669474	-8.56549	5.1e-14	2.25e-11
ENSRNOG00000005652	Cntn4	4:138269142-138787525	0	0.0219753	-12.26	5.53e-14	2.4e-11
ENSRNOG00000031024	Sirpd	2:76923591-76940969	1.38529	0	13.5202	1.54e-13	6.47e-11
ENSRNOG00000027393	AC129824.1	3:3697529-3723789	0.0148427	1.27073	-6.55371	1.7e-13	7.04e-11
ENSRNOG00000004003	Dusp10	13:104284660-104321455	1.29763	6.34876	-2.18362	3.22e-13	1.32e-10
ENSRNOG00000020945	Ms4a1	1:227427270-227441442	0.0279317	6.86756	-6.16797	7.41e-13	2.79e-10
ENSRNOG00000015603	Prkce	6:9790422-9973396	2.11597	6.82324	-1.58885	8.64e-13	3.21e-10
ENSRNOG00000011107	Pcsk1	2:91450162-91497091	11.5262	3.21405	1.94038	2.79e-12	1.03e-09
ENSRNOG00000046151	Tubb1	3:172550258-172558114	13.3258	48.7464	-1.76625	3.4e-12	1.23e-09
ENSRNOG00000038365	Plekha2	16:71707943-71787787	7.28441	27.6403	-1.80299	3.47e-12	1.23e-09
ENSRNOG00000028896	A2m	4:154309426-154359137	5.08098	1.07962	2.34248	3.96e-12	1.38e-09
ENSRNOG00000027233	Trpc5	X:115627653-115908693	0.036071	0	12.2671	4.99e-12	1.72e-09
ENSRNOG00000022071	Itga2b	10:90398132-90415070	11.3164	36.8006	-1.59825	7.7e-12	2.59e-09
ENSRNOG00000037908	Prg3	3:72395218-72401318	5.72393	116.463	-4.20105	8.6e-12	2.86e-09
ENSRNOG00000008394	Prg2	3:72385666-72389276	68.9263	733.033	-3.27263	8.76e-12	2.88e-09
ENSRNOG00000020505	Map4k1	1:87938042-87972132	5.88497	22.505	-1.85308	9.26e-12	3.01e-09
ENSRNOG00000052348	Vpreb1	11:88375930-88378357	0.030752	13.714	-7.26528	9.5e-12	3.05e-09
ENSRNOG00000028394	Vpreb3	20:13654809-13657943	0.0505017	7.17628	-7.47748	1.09e-11	3.46e-09
ENSRNOG00000014963	Adgrg1	19:10423501-10460674	3.39341	12.1608	-1.74575	1.24e-11	3.87e-09
ENSRNOG00000012045	Adgrb3	9:31281316-32019205	0	0.0105143	-11.7351	1.6e-11	4.93e-09
ENSRNOG00000025691	Pla2g7	9:19935768-19978013	31.2699	12.1411	1.45956	1.73e-11	5.23e-09
ENSRNOG00000015773	Il21r	1:196996581-197024166	1.75139	9.24994	-2.28953	1.79e-11	5.34e-09
ENSRNOG00000004441	Fcmr	13:47602692-47617064	2.27301	12.6754	-2.38166	1.85e-11	5.47e-09
ENSRNOG00000058938	Camkv	8:116715755-116730061	0.018628	1.43769	-6.09969	1.98e-11	5.79e-09
ENSRNOG00000008707	Epx	10:75160690-75171774	16.7604	154.821	-3.07044	2.91e-11	8.25e-09
ENSRNOG00000003304	Chad	10:82292110-82296651	52.259	14.9664	1.90512	3.94e-11	1.08e-08
ENSRNOG00000005278	Trhde	7:57253023-57679795	0.037901	0.494062	-2.9734	4.59e-11	1.23e-08
ENSRNOG00000016519	Kdm1b	17:17987972-18028808	5.11143	19.2058	-1.7962	4.68e-11	1.24e-08
ENSRNOG00000009031	Gucy2c	4:170659998-170740274	0.0122253	0.450488	-5.05849	4.82e-11	1.27e-08
XLOC_052024	XLOC_052024	16:47995031-48115011	0	0.062403	-11.678	9.9e-11	2.51e-08
ENSRNOG00000020743	Cyp2s1	1:82594042-82610350	0.843374	8.79736	-3.61736	1.22e-10	3.02e-08
XLOC_044032	XLOC_044032	14:78402073-78422829	0	0.391567	-11.55	1.22e-10	3.02e-08
ENSRNOG00000050224	Stambpl1	1:252497006-252536502	3.942	19.2793	-2.57861	1.82e-10	4.39e-08
ENSRNOG00000060011	LOC103694871	AABR07024104.1:7955-10980	0.0348237	6.89723	-8.26784	2.2e-10	5.25e-08
ENSRNOG00000004110	Trib2	6:41016730-41039437	7.71154	22.9454	-1.47283	4.28e-10	9.97e-08
ENSRNOG00000052541	LOC103690023	KL568414.1:49474-53241	0	1.63142	-11.3957	4.46e-10	1.02e-07
ENSRNOG00000001776	Muc20	11:71222600-71236490	0.383462	4.65055	-3.41421	9.73e-10	2.13e-07
ENSRNOG00000021546	Sit1	5:58985829-58987760	0.0450773	5.04381	-6.42821	1.01e-09	2.18e-07
ENSRNOG00000016910	Ralgps1	3:12178853-12415073	0.267371	1.14635	-1.98698	1.37e-09	2.93e-07
ENSRNOG00000021155	Ctsk	2:196655469-196666446	835.964	373.773	1.25139	1.78e-09	3.74e-07
ENSRNOG00000061379	C7	2:54709138-54777729	12.8709	5.70767	1.27264	2.05e-09	4.29e-07
ENSRNOG00000008025	Bend5	5:131257127-131312335	0.447517	2.29807	-2.55183	2.1e-09	4.36e-07
ENSRNOG00000001796	Dgkg	11:81972219-82163165	1.41884	4.52915	-1.56034	2.39e-09	4.88e-07
ENSRNOG00000030246	Btla	11:60521356-60547499	0.257332	3.42738	-3.19768	2.53e-09	5.1e-07
ENSRNOG00000018830	Aff3	9:44839960-45292047	4.98328	12.9994	-1.27735	3.45e-09	6.8e-07
ENSRNOG00000014443	Pde5a	2:226900619-227041576	8.24111	20.4069	-1.2062	3.48e-09	6.82e-07
ENSRNOG00000007664	Tnfrsf13c	7:123453788-123456268	0.0756973	4.97676	-5.87635	3.87e-09	7.53e-07
ENSRNOG00000054371	Prkcg	1:64407114-64433636	0.215823	2.14792	-3.19805	4.55e-09	8.74e-07
ENSRNOG00000017767	Mrvi1	1:175681960-175796040	2.56807	7.02766	-1.3468	6.22e-09	1.18e-06
ENSRNOG00000019689	Vwf	4:158088505-158219523	7.98828	20.1913	-1.2368	6.39e-09	1.2e-06
ENSRNOG00000059120	AABR07011031.1	2:156682498-156814950	1.62888	0.307658	3.66775	6.5e-09	1.22e-06
XLOC_113780	XLOC_113780	5:47393814-47414568	0.052948	1.86159	-5.2357	6.94e-09	1.28e-06
ENSRNOG00000006604	Thy1	8:48382121-48386935	17.8042	58.6094	-1.61701	6.95e-09	1.28e-06
ENSRNOG00000004736	Ralgps2	13:74412192-74564184	3.21479	17.3808	-2.44124	7.69e-09	1.41e-06
ENSRNOG00000021243	Siglec1	3:123612067-123631109	5.02953	1.0568	2.34869	9.96e-09	1.82e-06
ENSRNOG00000024237	Scel	15:87704340-87820779	0	0.0389097	-10.907	1.01e-08	1.84e-06
ENSRNOG00000003094	Cmahp	17:42583945-42640910	0.708339	6.48565	-3.23902	1.18e-08	2.1e-06
ENSRNOG00000043182	Septin6	X:123524950-123662350	6.45643	19.0848	-1.44997	1.3e-08	2.3e-06
ENSRNOG00000017912	Atp2a3	10:59529785-59560433	17.6931	52.9583	-1.47028	1.42e-08	2.49e-06
ENSRNOG00000010253	Cd163	4:156752082-156785467	34.5119	14.5052	1.32685	1.43e-08	2.49e-06
ENSRNOG00000026392	Cdh12	2:72006099-72540263	0	0.00808667	-10.9407	1.45e-08	2.51e-06
ENSRNOG00000048722	LOC103690365	4:170092537-170117325	0	46.7397	-14.1549	1.49e-08	2.56e-06
ENSRNOG00000012176	Rab27b	18:68488942-68551558	5.50499	13.9721	-1.24263	1.5e-08	2.57e-06
ENSRNOG00000009184	Foxp1	4:131366744-131694755	8.89317	23.584	-1.29869	1.54e-08	2.63e-06
ENSRNOG00000034164	Cr2	13:113890272-113927877	0.230726	2.17841	-2.87592	1.91e-08	3.23e-06
ENSRNOG00000048706	Nox1	X:104909326-104932508	0	0.159435	-10.6831	2.41e-08	4.06e-06
ENSRNOG00000011566	Cecr2	4:153217782-153322564	10.955	31.4922	-1.53812	2.69e-08	4.5e-06
ENSRNOG00000003064	Bst1	14:71797260-71814724	3.83487	21.8379	-2.78363	2.79e-08	4.64e-06
ENSRNOG00000022868	Ell3	3:113401734-113405829	0.12427	3.87932	-4.82782	2.82e-08	4.67e-06
ENSRNOG00000022899	Cdk15	9:66058047-66148087	0	0.061963	-11.2876	3.17e-08	5.22e-06
ENSRNOG00000029993	Kynu	3:28416954-28566928	0.195988	1.56173	-2.75135	4.09e-08	6.64e-06
ENSRNOG00000000321	Cd24	20:48335540-48340846	37.8153	100.39	-1.30273	4.17e-08	6.72e-06
ENSRNOG00000010584	Tmem123	8:5967341-5997383	21.2025	16.7939	-1.60776	4.18e-08	6.72e-06
ENSRNOG00000038286	Slamf6	13:90300853-90322457	0.592024	4.28649	-2.6404	4.73e-08	7.56e-06
ENSRNOG00000026764	Pla2g4c	1:75428027-75620911	0.0807177	3.82193	-4.93705	4.89e-08	7.77e-06
ENSRNOG00000058285	Nme8	17:47301511-47368553	0	0.0549513	-10.5925	6.06e-08	9.58e-06
ENSRNOG00000003069	Cd38	14:71715269-71754672	3.30026	9.28397	-1.38779	6.18e-08	9.72e-06
ENSRNOG00000000811	Pkib	20:40618128-40712592	0.608102	7.46545	-3.51267	7.17e-08	1.11e-05
ENSRNOG00000004275	Egfl6	X:29430831-29488739	0.520239	2.60515	-2.19958	8.33e-08	1.29e-05
ENSRNOG00000058446	Il7r	KL567908.1:25355-47617	1.19909	6.14674	-2.23879	9.65e-08	1.47e-05
ENSRNOG00000023622	LOC100910021	8:106863494-106870994	0	1.43011	-12.2035	1.02e-07	1.54e-05
ENSRNOG00000058460	AABR07051551.2	3:16846412-17155153	1.82042	3.38566	-3.39036	1.12e-07	1.69e-05
ENSRNOG00000023007	Col6a6	8:114353825-114449956	0.621746	2.10696	-1.65269	1.23e-07	1.84e-05
ENSRNOG00000049895	Pigg	14:2410342-2438592	0	1.04685	-13.7226	1.26e-07	1.88e-05
ENSRNOG00000002158	Ibsp	14:6801204-6813945	620.74	264.289	1.32777	1.44e-07	2.14e-05
ENSRNOG00000054277	Capsl	2:58724855-58747843	0	0.130268	-10.377	1.45e-07	2.14e-05
ENSRNOG00000032247	Bank1	2:241273763-241545250	0.400418	1.7774	-2.01674	1.85e-07	2.71e-05
ENSRNOG00000047204	Gp6	1:73040901-73064641	2.43877	8.17408	-1.63566	1.97e-07	2.86e-05
ENSRNOG00000013397	Foxo1	2:141451234-141527016	6.48243	15.3664	-1.14185	1.98e-07	2.86e-05
ENSRNOG00000038740	Gimap7	4:78354335-78358503	0.592416	8.04912	-3.66268	2.02e-07	2.9e-05
ENSRNOG00000050586	AABR07034362.2	11:67451549-67529062	4.47727	20.0669	-2.07427	2.12e-07	3.02e-05
ENSRNOG00000010121	Lef1	2:236195082-236345056	3.47287	11.9448	-1.66614	2.52e-07	3.57e-05
ENSRNOG00000000053	Crp	13:91054974-91093713	0	0.265986	-10.3593	2.61e-07	3.68e-05
ENSRNOG00000007628	Ptp4a3	7:114997103-115002902	6.6054	24.4361	-1.77789	2.82e-07	3.94e-05
ENSRNOG00000002794	Selp	13:82429063-82464628	2.34191	6.83047	-1.4518	2.92e-07	4.05e-05
ENSRNOG00000004772	Cytip	3:44146339-44177689	4.57354	16.5654	-1.75231	3.09e-07	4.25e-05
ENSRNOG00000033433	Csrnp1	8:128659868-128672284	2.54439	9.78968	-1.84225	3.29e-07	4.5e-05
ENSRNOG00000012749	C1qb	5:155246447-155252003	80.8935	34.8354	1.30403	3.34e-07	4.55e-05
ENSRNOG00000001839	Vpreb2	11:87157887-87159042	0.08785	8.97246	-6.51729	3.64e-07	4.92e-05
ENSRNOG00000036880	Arl5c	10:85941176-85948655	0.291759	6.03394	-4.22747	3.76e-07	5.06e-05
ENSRNOG00000043451	Spp1	14:6673686-6679901	867.394	458.262	1.02065	3.78e-07	5.06e-05
ENSRNOG00000003769	Tmem163	13:44166042-44345735	0.088651	0.807154	-2.92099	4.01e-07	5.33e-05
ENSRNOG00000028015	Pf4	14:18848549-18849258	113.634	329.196	-1.43157	4.6e-07	6.03e-05
ENSRNOG00000003491	Prkca	10:96191133-96584947	6.02657	13.3151	-1.04313	4.61e-07	6.03e-05
ENSRNOG00000047990	AABR07008142.1	2:45578821-45621855	0	0.254247	-10.2011	4.87e-07	6.34e-05
ENSRNOG00000046494	LOC100361018	20:29928145-30088608	1.09752	1.74982	-2.16546	5.13e-07	6.62e-05
ENSRNOG00000019057	Prkcq	17:70971915-71105286	1.65078	4.1528	-1.22669	5.14e-07	6.62e-05
ENSRNOG00000052407	Btk	X:105360922-105390580	7.67019	18.7845	-1.18258	5.61e-07	7.2e-05
ENSRNOG00000053327	AABR07060953.1	4:101639635-101910348	0.617699	2.65761	-1.92202	5.69e-07	7.27e-05
ENSRNOG00000022480	Atp6v1g3	13:55274199-55288651	0	0.170909	-10.1087	5.87e-07	7.44e-05
ENSRNOG00000061091	AABR07045071.1	20:33492759-33521118	0.600434	0	12.9796	5.9e-07	7.44e-05
ENSRNOG00000055858	Myb	1:16617961-16691186	14.6946	36.1292	-1.44481	5.95e-07	7.47e-05
ENSRNOG00000000528	Fgd2	20:6929221-6990336	2.55488	9.21296	-1.80453	5.98e-07	7.47e-05
ENSRNOG00000046981	Gp1bb	11:86520992-86522169	0.456646	24.2295	-5.56458	6.5e-07	8.09e-05
ENSRNOG00000012804	C1qc	5:155255005-155258392	98.3647	41.8108	1.32257	6.92e-07	8.57e-05
ENSRNOG00000002285	Fam122b	X:157854272-157879928	0.855045	0	12.8241	7.57e-07	9.34e-05
ENSRNOG00000005214	Plek	14:100151210-100259417	24.7638	54.3158	-1.03345	7.68e-07	9.4e-05
ENSRNOG00000031445	LOC100361866	15:28154482-28241198	7.82879	99.5717	-3.52044	7.94e-07	9.67e-05
ENSRNOG00000021285	Celsr1	7:126775516-126913585	0.15177	0.690231	-2.07528	8.03e-07	9.74e-05
ENSRNOG00000056651	LOC103690068	1:88192370-88193346	2.21898	0	10.0249	8.63e-07	0.000104172
ENSRNOG00000010259	Esrrb	6:110410141-110455906	0.0490657	0	10.0857	1.14e-06	0.000136798
ENSRNOG00000033215	RT1-Db1	20:4087618-4097190	0.553602	6.59655	-3.32445	1.2e-06	0.000143174
ENSRNOG00000008570	Cadps	15:15275541-15667778	0	0.0372717	-12.6322	1.36e-06	0.000160345
ENSRNOG00000033372	Klhl24	11:84602597-84633504	16.1001	38.3746	-1.13861	1.36e-06	0.000160345
ENSRNOG00000052564	Gpx3	10:40247436-40255422	398.338	195.407	1.12162	1.52e-06	0.000177181
ENSRNOG00000001313	Gnaz	20:14593819-14620019	2.172	6.73168	-1.52574	1.53e-06	0.000178508
ENSRNOG00000003209	Pcp4l1	13:89542378-89565813	0.228342	2.59543	-4.00961	1.56e-06	0.000180772
ENSRNOG00000022822	Fam169b	1:129254644-129334292	0.11766	1.86803	-3.85658	1.66e-06	0.000192142
ENSRNOG00000005905	Pde4b	5:121952977-122136814	2.94194	6.42557	-1.13367	1.71e-06	0.000196393
ENSRNOG00000013072	Plxna4	4:59445767-59809321	0.896404	2.00769	-1.05922	1.74e-06	0.000199525
ENSRNOG00000021098	Rasgrp2	1:221773254-221788765	15.3967	39.2592	-1.23917	1.82e-06	0.000208055
ENSRNOG00000008187	Ubash3b	8:45223992-45375435	2.80341	6.24246	-1.05205	1.85e-06	0.000210203
ENSRNOG00000007422	Vav2	3:5811504-5976244	4.25403	9.52876	-1.07547	1.93e-06	0.000217937
ENSRNOG00000003959	Rgs18	13:61564467-61591353	21.3869	50.0159	-1.1265	1.97e-06	0.000220712
ENSRNOG00000038197	Cd226	18:86299463-86394769	2.28724	7.834	-1.63476	2.17e-06	0.000242214
ENSRNOG00000005731	Birc3	8:6048969-6076598	1.62787	5.64968	-1.68627	2.3e-06	0.000254017
ENSRNOG00000001315	Rsph14	20:14577166-14653038	0	0.0432597	-9.91769	2.71e-06	0.00029398
ENSRNOG00000055650	Pou2f2	1:81964104-82004538	0.782352	3.15236	-1.89757	2.85e-06	0.000307774
ENSRNOG00000007270	Il12rb2	4:98052842-98141482	0.245068	1.14461	-2.10344	2.86e-06	0.000308245
ENSRNOG00000052391	Sh3bp5	16:7473370-7538201	7.08905	15.6939	-1.03822	2.9e-06	0.000310429
ENSRNOG00000004438	Cntn1	7:133400485-133586677	3.13727	1.63501	1.0436	3.13e-06	0.000333511
ENSRNOG00000016945	Pla2g2a	5:157282669-157285328	9.02838	35.3814	-1.86558	3.29e-06	0.000348966
ENSRNOG00000025042	Pde3a	4:175431904-175700238	2.59799	5.38385	-0.951524	3.3e-06	0.000348966
ENSRNOG00000003997	Pld5	13:94025369-94355219	0.0728563	0.497712	-2.56318	3.39e-06	0.00035649
ENSRNOG00000015945	Cd3g	8:49274960-49280901	0.261636	4.73938	-4.04999	3.44e-06	0.000359831
ENSRNOG00000057981	AABR07057170.1	7:58570481-58580844	0	0.308943	-9.87964	3.91e-06	0.000406487
ENSRNOG00000008738	Tp53i11	3:82081906-82097056	3.78549	11.2662	-1.47011	3.96e-06	0.00040942
ENSRNOG00000056092	Hephl1	8:13614800-13680870	0	0.0337087	-9.92884	4.19e-06	0.000431186
ENSRNOG00000015310	Lrrc32	1:163445527-163457424	2.45072	8.84391	-1.74306	4.3e-06	0.000439745
ENSRNOG00000007047	Eps8	4:171475567-171591882	3.69915	8.34343	-1.07044	4.38e-06	0.00044454
ENSRNOG00000021833	Myrfl	7:59799419-59882077	0	0.0235377	-9.77403	4.58e-06	0.000462812
ENSRNOG00000058775	Ly49s7	4:165169065-165195489	0	0.075328	-9.7057	4.59e-06	0.000462812
ENSRNOG00000046289	AABR07051556.1	3:16965992-17070441	0.295033	2.72335	-5.85707	4.88e-06	0.00048988
ENSRNOG00000002188	Hpse	14:10534423-10575224	3.88099	9.22894	-1.14223	5.04e-06	0.000504238
ENSRNOG00000005195	Cst3	3:143219686-143223615	1007.83	490.146	1.12732	5.25e-06	0.00052345
ENSRNOG00000017496	Cnp	10:88490798-88497356	9.24636	26.2243	-1.39772	5.56e-06	0.00055101
ENSRNOG00000019024	Trim67	19:57556694-57592722	0.0479267	0	9.68295	5.75e-06	0.000564502
ENSRNOG00000006950	Padi3	5:159309000-159336429	1.32212	5.5239	-1.94043	5.78e-06	0.000564502
ENSRNOG00000007765	Frzb	3:67635607-67668772	31.2425	16.2946	1.04681	5.83e-06	0.000567334
ENSRNOG00000013647	Polm	14:86069016-86078954	1.15134	7.09578	-2.58094	5.89e-06	0.000571542
ENSRNOG00000025273	AABR07068728.1	9:116652530-116981172	0.0278583	0	12.1314	5.98e-06	0.000575893
ENSRNOG00000031100	Klhl1	15:80271731-80713153	0	0.0242463	-12.1616	6.51e-06	0.000624272
ENSRNOG00000014816	Slc1a1	1:246926595-247037056	0.469189	53.1882	-4.08509	6.52e-06	0.000624272
ENSRNOG00000009205	Lmo4	2:250218641-250241775	18.751	50.3016	-1.34513	7.23e-06	0.000687031
ENSRNOG00000027733	Lair1	1:73837944-73868695	0	0.056972	-9.64246	7.5e-06	0.000706203
ENSRNOG00000027037	Alox12	10:56851734-56864005	4.99582	14.6471	-1.45366	8.28e-06	0.000769128
ENSRNOG00000002154	Mepe	14:6782012-6793558	34.0426	16.0499	1.17488	9.12e-06	0.000839486
ENSRNOG00000057696	Sbk1	1:197659187-197681006	1.16313	4.25123	-1.76121	9.67e-06	0.000887394
XLOC_074533	XLOC_074533	2:190149548-190204165	0.219752	0	12.4205	9.91e-06	0.000906306
ENSRNOG00000055404	AABR07012826.1	2:209661244-209779614	1.07622	2.95187	-1.34676	1.02e-05	0.000930948
ENSRNOG00000034266	Ccdc63	12:39913628-39950641	0	0.043628	-9.49227	1.04e-05	0.000945242
ENSRNOG00000012942	Satb1	9:2190915-2274629	5.31061	12.4329	-1.10803	1.07e-05	0.000968173
ENSRNOG00000013309	Pik3ap1	1:260527781-260638915	12.1912	26.1925	-0.996971	1.2e-05	0.00107492
ENSRNOG00000031032	Hmgn3	8:90628209-90664554	4.28164	10.5163	-1.23463	1.23e-05	0.00109374
ENSRNOG00000018378	Cacnb2	17:81798756-82017682	0.161819	0.673633	-1.82605	1.31e-05	0.00116125
ENSRNOG00000048167	AABR07051551.1	3:16610086-16884018	1.74342	4.08658	-1.14143	1.55e-05	0.00135887
ENSRNOG00000000886	Caln1	12:29308341-29743705	0.0141477	0	11.5062	1.58e-05	0.00137616
ENSRNOG00000014476	Evl	6:132510757-132590241	9.59945	19.9454	-0.948254	1.61e-05	0.00140437
ENSRNOG00000021468	Grm8	4:54474136-55407922	0	0.0232787	-9.3727	1.62e-05	0.00140831
ENSRNOG00000009076	Ttpal	3:159995064-160013274	5.88169	14.1569	-1.16438	1.64e-05	0.00141771
ENSRNOG00000031090	RT1-CE7	20:4673843-4896970	2.98316	7.9325	-1.36961	1.67e-05	0.00143509
ENSRNOG00000038427	AABR07015812.1	14:78359682-78377825	0	0.0854147	-9.41905	1.77e-05	0.00149917
ENSRNOG00000029227	AABR07054469.1	3:155160908-155266952	0.143696	1.5967	-3.22052	1.8e-05	0.00152738
ENSRNOG00000050944	AABR07065768.1	6:140485452-140587588	1.21454	5.74988	-2.12821	1.85e-05	0.00155646
ENSRNOG00000006557	Cyfip2	10:31278746-31419235	20.1256	44.3395	-1.02835	1.86e-05	0.00156462
ENSRNOG00000017030	Arid1b	1:45880958-46234874	19.4602	36.5387	-1.07058	1.87e-05	0.00156876
ENSRNOG00000049584	LOC103693129	8:74868676-74940886	0.0217693	0.40319	-3.23833	1.91e-05	0.00159107
ENSRNOG00000051433	LOC103692167	4:114776797-114779446	0	2.18508	-11.3712	2.06e-05	0.00171273
ENSRNOG00000005565	Traf3ip3	13:111892760-111917587	2.94926	9.72825	-1.69398	2.12e-05	0.00175082
ENSRNOG00000002089	Ccng2	14:16267573-16276068	8.8063	23.756	-1.31791	2.15e-05	0.00176958
ENSRNOG00000003748	RGD1565785	X:54390733-54409466	1.31773	5.01663	-1.80823	2.16e-05	0.00176958
ENSRNOG00000020699	Cd37	1:101230533-101236065	20.3214	54.2556	-1.29882	2.24e-05	0.00183347
ENSRNOG00000004409	Sash3	X:134979646-134994349	8.68909	21.4556	-1.19294	2.34e-05	0.00190624
ENSRNOG00000049829	AABR07060872.1	4:98337367-98523502	75.4777	159.367	-1.19247	2.35e-05	0.001914
ENSRNOG00000004158	Hdac9	6:53488883-54059119	1.25943	2.84204	-1.16099	2.43e-05	0.00196551
ENSRNOG00000021157	Ctss	2:197655786-197679458	30.2628	17.3597	0.902043	2.45e-05	0.0019738
ENSRNOG00000021724	Ptprcap	1:219403970-219406128	3.01597	17.2021	-2.39982	2.52e-05	0.00202069
ENSRNOG00000054620	AC135026.1	1:48874885-48905231	23.6914	10.7692	1.22473	2.54e-05	0.00203081
ENSRNOG00000022635	Dlg2	1:156552328-157269747	0.249459	1.36116	-2.79708	2.56e-05	0.00203832
ENSRNOG00000003476	Slc6a4	10:63153651-63176463	0.743612	3.16207	-1.97029	2.63e-05	0.00209078
ENSRNOG00000060463	AABR07062799.2	6:9482869-9684638	0.975314	3.78428	-1.86043	2.66e-05	0.00210681
ENSRNOG00000032844	RT1-Da	20:4127644-4132616	3.1362	19.061	-2.49054	2.86e-05	0.00225172
ENSRNOG00000025787	Spag6l	11:88424414-88508601	0	0.01703	-9.31121	2.87e-05	0.00225703
ENSRNOG00000057855	F5	13:82466892-82535534	14.8455	31.4972	-0.982096	3.03e-05	0.0023715
ENSRNOG00000051986	Plcg2	19:50045020-50173220	11.0667	24.7833	-1.05079	3.07e-05	0.00239481
ENSRNOG00000015376	Npas1	1:78420652-78440738	0.064475	0	9.28958	3.13e-05	0.0024352
ENSRNOG00000012881	Fgl2	4:10323607-10329241	18.3566	42.995	-1.12316	3.74e-05	0.00287964
ENSRNOG00000055586	LOC100910650	11:71211768-71217186	0.424705	3.56784	-3.28294	3.81e-05	0.00291925
ENSRNOG00000004606	Meis1	14:103181281-103321270	1.27752	2.68395	-0.967949	4.01e-05	0.00304909
ENSRNOG00000014723	Cbfa2t3	19:55441572-55510460	5.68967	11.1042	-0.923515	4.1e-05	0.0031116
ENSRNOG00000003469	MAST1	19:26026043-26053762	0.00599667	0.305591	-5.53727	4.11e-05	0.0031116
XLOC_047609	XLOC_047609	15:87847056-87885841	0.253834	1.19975	-2.14438	4.46e-05	0.0033503
ENSRNOG00000017788	Katnal2	18:73283748-73360373	0	0.0624637	-11.0338	4.83e-05	0.00361451
ENSRNOG00000022792	Lamp3	11:84972132-85000681	0	0.04195	-9.05263	4.86e-05	0.00361451
ENSRNOG00000004221	Lgr5	7:58448277-58587787	0.073231	0.399876	-2.32582	4.86e-05	0.00361451
ENSRNOG00000009465	Sfrp2	2:182723854-182731764	1.23516	5.86775	-2.13805	4.86e-05	0.00361451
ENSRNOG00000017273	RGD1563917	9:92751829-92775816	0.840536	5.15346	-2.37629	4.89e-05	0.00361471
ENSRNOG00000028090	Arhgef18	12:1864854-1998127	5.74983	13.5938	-1.09177	4.89e-05	0.00361471
XLOC_002294	XLOC_002294	1:82003787-82027042	0.189777	2.81315	-3.74363	5.04e-05	0.00370921
ENSRNOG00000004150	Slc9a7	X:2364809-2614770	1.13746	4.86196	-2.16795	5.27e-05	0.00387096
ENSRNOG00000042860	Pappa2	13:76389150-76660245	3.70057	1.92099	1.06747	5.64e-05	0.00412113
ENSRNOG00000008138	Jhy	8:45083732-45140292	0.006058	0.604385	-6.59523	5.89e-05	0.00427899
ENSRNOG00000029260	Pitpnm2	12:37771177-37903855	4.29918	8.93392	-1.22296	6.19e-05	0.00447404
ENSRNOG00000018570	C1qtnf3	2:60920257-60942500	8.3563	22.418	-1.31169	6.19e-05	0.00447404
ENSRNOG00000024115	C6	2:54460332-54533797	16.2359	6.24223	1.41131	6.45e-05	0.00464732
ENSRNOG00000021046	Sult2b1	1:101710959-101773508	0.0190297	0	8.90183	6.58e-05	0.00472055
XLOC_012193	XLOC_012193	1:137408442-137427306	7.14787	19.3909	-1.44491	6.73e-05	0.00481521
ENSRNOG00000018251	Mrc1	17:81352700-81433743	29.4283	17.6703	0.827801	6.84e-05	0.00488165
ENSRNOG00000008524	Glcci1	4:34279337-34619107	4.07123	8.93574	-1.06796	6.98e-05	0.00496798
ENSRNOG00000009180	Xkr7	3:148510779-148533404	0	0.047982	-8.91731	7.11e-05	0.00504998
ENSRNOG00000005695	Mgp	4:170856751-170860225	419.811	255.242	0.814471	7.14e-05	0.00506071
ENSRNOG00000050561	AABR07065821.1	6:142791766-142880382	0.451777	3.54972	-2.82893	7.4e-05	0.00519587
ENSRNOG00000013850	Hes5	5:172364421-172365188	0	1.38861	-8.88605	7.41e-05	0.00519587
ENSRNOG00000029089	Foxr1	8:48754154-48762342	0.039332	1.08654	-4.7857	7.59e-05	0.00528375
ENSRNOG00000028541	Btnl2	20:4141878-4154978	0	0.155874	-9.58728	7.9e-05	0.00546184
ENSRNOG00000050864	Cpne1	3:151616037-151625644	4.45748	0	14.2487	8.03e-05	0.00551034
ENSRNOG00000011381	Acsbg1	8:59184113-59239954	0.660667	0.110769	2.63342	8.08e-05	0.00553323
ENSRNOG00000017022	Cerk	7:127015162-127058056	11.5068	22.5857	-0.866619	8.17e-05	0.00558098
ENSRNOG00000008478	Mmp13	8:5522739-5533018	496.246	282.433	0.915016	8.31e-05	0.00565235
ENSRNOG00000006926	Atp6v0d2	5:33843519-33892462	20.8632	12.4871	0.831313	8.66e-05	0.00587106
ENSRNOG00000006831	Pgr	8:7128656-7187796	0.0590517	0.440634	-2.78369	9.27e-05	0.00624062
ENSRNOG00000002180	Tbc1d1	14:45598743-45797978	8.76135	17.7687	-0.903372	9.39e-05	0.00629384
ENSRNOG00000013321	Dock11	X:122507374-122690465	7.56414	15.9189	-0.961283	9.62e-05	0.00643244
ENSRNOG00000056285	AABR07065693.3	6:139293065-139487235	1.72693	5.69987	-1.64113	9.67e-05	0.00645044
ENSRNOG00000028624	Kif26b	13:96775357-97173469	1.56232	0.89151	0.906931	0.000106734	0.00703969
ENSRNOG00000010680	Med12l	2:149213134-149532292	3.70028	7.35292	-0.913335	0.000112468	0.00738314
ENSRNOG00000023151	Scgb2a1	1:225899313-225902676	0.255293	0	8.72195	0.000119555	0.00781256
ENSRNOG00000053457	Rnase3	15:28240731-28241198	4.28622	57.1293	-3.58726	0.000121409	0.00790603
ENSRNOG00000014886	Fam107b	17:78485648-78561613	8.70177	18.6057	-0.972241	0.000122559	0.00795441
ENSRNOG00000005954	Il5ra	4:138795327-138830117	0.164522	0.926159	-2.37097	0.000124104	0.00803641
ENSRNOG00000003328	Cdip1	10:10967658-10989936	7.45679	18.2258	-1.32686	0.000124792	0.00805415
ENSRNOG00000033099	Dcc	18:66523120-67224566	0.280343	0.131515	1.18499	0.00012494	0.00805415
ENSRNOG00000005561	Brinp1	5:84919367-85123829	0	0.0176483	-10.6637	0.000126816	0.00815669
ENSRNOG00000009837	Tmem131l	2:182897830-183031214	14.6556	29.3654	-0.869216	0.000128285	0.00823267
ENSRNOG00000019184	Npr3	2:61888950-61949926	0.190968	0.883372	-2.10086	0.000132541	0.00848679
ENSRNOG00000014007	Gfod1	17:23823632-23923792	5.45992	10.5228	-0.845953	0.000138333	0.00875964
ENSRNOG00000032989	Lrrn4	3:125523781-125533600	0	0.0979387	-8.73268	0.000139641	0.008823
ENSRNOG00000049361	Gas7	10:54126486-54236476	9.60363	20.2469	-0.960848	0.000140996	0.00888897
ENSRNOG00000034025	Ptprj	3:79233525-79390956	14.9989	28.601	-0.809283	0.000142534	0.00896615
ENSRNOG00000026705	Dgki	4:64374342-64831473	3.47636	1.9868	0.89769	0.000145517	0.00910574
ENSRNOG00000014605	Lig4	16:85331866-85337769	6.42491	19.1071	-1.45855	0.000145567	0.00910574
ENSRNOG00000021345	Timd2	10:31755505-31790586	0.265125	1.68001	-2.9791	0.000146918	0.00914148
ENSRNOG00000059645	AABR07054705.2	3:167219093-167233353	0.303292	0	10.4003	0.000150183	0.00930417
ENSRNOG00000057753	Nup62cl	X:111334252-111365849	0	0.1045	-10.5031	0.000154354	0.00952141
ENSRNOG00000005307	Slc4a10	3:47995959-48287910	0.008154	0.254714	-4.78566	0.000174836	0.0106622
ENSRNOG00000049870	AABR07065812.2	6:142177345-142178771	0	0.552345	-8.46956	0.000182913	0.0110684
ENSRNOG00000005410	Cdca7l	6:145740035-145785606	3.18457	6.73624	-0.982073	0.000183973	0.011109
ENSRNOG00000049378	AABR07062583.1	4:183476093-183544850	2.93317	5.98205	-0.922684	0.00018842	0.0113536
ENSRNOG00000009722	Chd3	10:55943446-55965216	9.91163	19.8021	-0.893967	0.000189966	0.0114227
ENSRNOG00000022946	Slc22a3	1:48433079-48521256	2.01693	0.839196	1.36255	0.000193084	0.0115375
ENSRNOG00000014290	Grm1	1:4753144-5165859	0	0.00710667	-10.3124	0.000203489	0.0120585
ENSRNOG00000019374	Csk	8:62405715-62424303	31.0419	58.0161	-0.797985	0.000205585	0.0120997
ENSRNOG00000002167	Dmp1	14:6889856-6900733	126.206	75.2437	0.835345	0.00020572	0.0120997
ENSRNOG00000018350	Shtn1	1:280130504-280233929	4.36089	2.41182	0.881465	0.000207467	0.0121434
ENSRNOG00000034230	Fcrl1	2:186555632-186724424	0.21137	1.32824	-2.50902	0.000208507	0.0121794
ENSRNOG00000016752	Crispld2	19:52647070-52705131	22.2256	13.919	0.783625	0.000211767	0.0122945
ENSRNOG00000055286	LOC103689986	1:88182155-88192969	1.69346	0	13.0235	0.000213991	0.0123985
ENSRNOG00000016434	Prkd2	1:78767911-78796231	4.75297	11.1796	-1.12893	0.000218358	0.0126005
ENSRNOG00000053086	Selenop	2:53105399-53116245	175.823	108.415	0.791516	0.000223634	0.012871
ENSRNOG00000000055	Fcrl6	13:90982814-90992406	0	0.0925377	-8.63716	0.000223946	0.012871
ENSRNOG00000003276	Myo1d	10:67866940-68142864	31.1735	19.9613	0.739906	0.000224742	0.0128909
ENSRNOG00000016166	Pdlim1	1:259308296-259357056	10.9333	20.4125	-0.798705	0.000225273	0.012894
ENSRNOG00000012807	C1qa	5:155261250-155264143	99.0182	53.8165	0.969565	0.000226785	0.0129304
ENSRNOG00000009037	Sulf1	5:5999475-6186329	13.397	7.40211	0.837916	0.00022754	0.0129476
ENSRNOG00000056052	AABR07060980.1	4:102147211-102187733	0.249129	2.43167	-4.92362	0.00023122	0.0131049
ENSRNOG00000058626	Kcnh8	9:3127618-3697736	0	0.00477367	-10.2674	0.000232053	0.0131261
ENSRNOG00000008585	Tmbim7	4:27606078-27638676	0	0.0231297	-8.39572	0.000233006	0.0131426
ENSRNOG00000058275	Spef2	2:58901939-59181863	0	0.0109077	-10.266	0.000233816	0.0131426
ENSRNOG00000017020	Inpp5d	9:94745217-94850771	13.0687	24.4977	-0.799966	0.000233961	0.0131426
ENSRNOG00000008153	Crtam	8:45153308-45215974	0	0.045084	-10.315	0.000238732	0.0133457
ENSRNOG00000056981	AABR07034956.1	12:1903165-1928988	3.43952	8.93946	-1.25757	0.000253758	0.014103
ENSRNOG00000054513	Zmiz2	14:86652365-86661441	0	1.91231	-12.9114	0.000256104	0.0142058
ENSRNOG00000050110	Stfa2	11:67465236-67470941	3.28404	12.7318	-1.83437	0.00025832	0.0143011
ENSRNOG00000017414	Irf7	1:214216019-214252456	13.605	5.20338	1.14488	0.000262662	0.0144575
ENSRNOG00000018937	Gstm7	2:210720704-210782856	14.1251	6.52809	1.15461	0.000268311	0.0147401
ENSRNOG00000017546	Mylk3	19:27404712-27441536	2.43041	0.411875	2.61382	0.000270434	0.0147999
ENSRNOG00000001229	Col18a1	20:12225202-12332858	7.16107	12.9313	-0.753101	0.000279276	0.0152256
ENSRNOG00000058590	AABR07034739.3	11:86093649-86097174	0.200544	3.28606	-3.5681	0.000289317	0.0156538
ENSRNOG00000019424	Aspdh	1:100419638-100530186	0.175593	0	11.1942	0.000291983	0.0157385
ENSRNOG00000037839	P2ry10	X:78196300-78210403	0.203953	1.52887	-2.77688	0.000297585	0.0159802
ENSRNOG00000018286	Chrna1	3:60445666-60460724	0	0.04472	-8.23107	0.000307359	0.0164657
ENSRNOG00000059625	RGD1560281	12:20667601-20677689	0.069993	0	8.41569	0.000308029	0.0164657
ENSRNOG00000023404	Slc9b2	2:240495371-240519141	11.1222	6.30557	0.909365	0.00030835	0.0164657
ENSRNOG00000016593	Pde6c	1:256822334-256877810	0.0188027	0.337035	-4.00167	0.000316132	0.0168213
ENSRNOG00000023427	Ano7	9:100511610-100551798	0	0.0232853	-8.70076	0.000316186	0.0168213
ENSRNOG00000009267	B3gnt2	14:107592336-107617161	28.2904	53.0301	-0.800719	0.000317264	0.0168275
ENSRNOG00000020080	Lrrc18	16:9194182-9430724	0.31708	1.2051	-1.70782	0.000317477	0.0168275
ENSRNOG00000015357	Bmper	8:24369916-24615479	1.31925	0.709789	0.990392	0.000328803	0.0173315
ENSRNOG00000058739	Snn	10:4578454-4644570	2.76674	6.42722	-0.941979	0.000343207	0.0180243
ENSRNOG00000017606	P2rx1	10:59566223-59581325	4.2142	10.4434	-1.20299	0.000348437	0.0182597
ENSRNOG00000008224	Jdp2	6:109466060-109505161	42.0793	26.2289	0.778637	0.000349198	0.0182597
ENSRNOG00000008129	Pla2r1	3:46488186-46621873	1.54554	0.830901	1.00872	0.000349771	0.0182597
ENSRNOG00000019159	Jakmip2	18:37869289-38088457	0	0.0129497	-10.0486	0.000350241	0.0182597
ENSRNOG00000001865	Serpind1	11:87913806-87924816	0.05411	0	8.14544	0.000365787	0.0190356
ENSRNOG00000031930	Bin2	7:142273833-142300382	23.5168	43.0564	-0.768366	0.000368524	0.0191085
ENSRNOG00000030431	RT1-Db2	20:4106189-4125387	0.0539953	1.25851	-4.42687	0.000373577	0.0192311
ENSRNOG00000021384	Ankrd44	9:61231988-61557807	8.62913	18.7723	-1.11734	0.000377529	0.0193997
ENSRNOG00000003666	Jchain	14:21177237-21183542	54.0539	114.681	-0.974345	0.000381069	0.0195116
ENSRNOG00000037524	Adam6a	6:138432550-138435035	0	0.243871	-8.09393	0.000383063	0.0195786
ENSRNOG00000013836	Arhgap17	1:193239040-193328371	11.8348	21.4301	-0.744228	0.000389203	0.0197864
ENSRNOG00000033815	AC142181.1	4:70572942-70821816	0.32588	1.3206	-1.68477	0.000390003	0.0197919
ENSRNOG00000016846	Pik3cd	5:166602053-166628028	10.4905	21.2384	-0.905472	0.000391507	0.0198331
ENSRNOG00000013934	Dennd2b	1:174137120-174289647	6.93022	4.37251	0.755947	0.00039379	0.0199135
ENSRNOG00000005690	Lmcd1	4:144192989-144252551	7.82251	4.63647	0.856142	0.000402612	0.0202879
ENSRNOG00000019082	LOC103690016	1:67368384-67390141	0.756433	4.25071	-2.39217	0.000406528	0.0204493
ENSRNOG00000019293	AABR07006025.1	1:214015219-214024153	1.30162	0	12.4797	0.000409303	0.0205527
ENSRNOG00000014264	AABR07027306.1	17:23661429-23761079	0.556778	1.37791	-1.21031	0.00041032	0.0205677
ENSRNOG00000059510	AABR07027870.1	17:47721977-47817248	2.19372	1.06585	1.11818	0.000428418	0.0214374
ENSRNOG00000060366	LOC102548682	2:198417619-198418029	200.424	2.8123	6.1669	0.000429255	0.0214418
ENSRNOG00000011977	Sema5a	2:85377318-85808970	10.2688	6.63435	0.723772	0.000443763	0.0220893
ENSRNOG00000019271	Ulk4	8:129632149-129919120	0.610858	1.24684	-0.924976	0.000444552	0.0220902
ENSRNOG00000036603	Ifit1bl	1:252914684-252922486	71.3622	20.7246	1.86836	0.000447945	0.0221733
ENSRNOG00000018577	Neil1	8:61817258-61823102	2.24519	9.53334	-1.96999	0.000449611	0.0221733
ENSRNOG00000008180	Lyn	5:16526058-16642648	28.0048	52.9699	-0.821546	0.000455258	0.022389
ENSRNOG00000002092	Hunk	11:30550141-30663465	3.13985	1.85945	0.846252	0.000468451	0.0229197
ENSRNOG00000013112	Dusp13	15:2734068-2748466	0.145795	0	9.34657	0.000474994	0.0231606
ENSRNOG00000056697	Kcnab1	2:155718359-156009526	2.03026	4.28172	-0.967979	0.000482138	0.023469
ENSRNOG00000057724	AC118957.1	6:114474806-114573828	1.00063	2.54056	-1.27925	0.000485495	0.0235922
ENSRNOG00000056258	Dsc1	18:11877561-11906827	0	0.0212623	-8.11735	0.000497444	0.0240911
ENSRNOG00000005386	Kitlg	7:42269784-42351054	7.99898	4.78525	0.834704	0.00050469	0.0243873
ENSRNOG00000046197	AABR07017658.1	15:29680015-29865650	0.15866	0	12.2573	0.000505265	0.0243873
ENSRNOG00000055790	Nup210l	2:189454340-189574171	6.19846	7.20701	-0.976962	0.000509403	0.0245457
ENSRNOG00000022760	Rubcnl	15:57065428-57102599	1.69351	4.00919	-1.13797	0.000511301	0.0245957
ENSRNOG00000015880	Dpep1	19:55982740-55998208	1.78826	0.351602	2.42826	0.000523952	0.025162
ENSRNOG00000039390	Slc37a2	8:39708638-39734594	25.069	15.0142	0.817388	0.000531285	0.0254467
ENSRNOG00000058932	Zfp202	8:44047592-44068003	1.05177	3.28005	-1.54057	0.00053963	0.0257422
ENSRNOG00000011033	Tekt2	5:144341946-144345531	0.0589323	1.05869	-3.95133	0.000548184	0.0260905
ENSRNOG00000017737	Dgkz	3:80844005-80875817	17.9649	34.1043	-0.803397	0.000549452	0.0260905
ENSRNOG00000011984	Cxcl14	17:9109731-9117750	41.8977	24.8343	0.844517	0.00055314	0.0262119
ENSRNOG00000027900	Glt6d1	3:3255638-3266260	0	0.062431	-8.2761	0.000570456	0.0268988
ENSRNOG00000013067	Phf21b	7:125649688-125720775	0.156154	0.945063	-2.7781	0.000576507	0.0270949
ENSRNOG00000050024	Ms4a4e	1:227584888-227607042	9.44302	4.78118	1.06913	0.00057884	0.0271599
ENSRNOG00000028207	Colgalt2	13:69797880-69901170	18.607	12.1031	0.723338	0.000582886	0.027305
ENSRNOG00000038976	Galntl6	16:35573058-35802979	0.0394367	0	12.0094	0.000584594	0.0273403
ENSRNOG00000009932	Mctp2	1:133324301-133559975	2.52412	5.93344	-0.992678	0.000589553	0.0275272
ENSRNOG00000024125	Slain1	15:87886783-87906474	0.35264	1.58784	-2.07563	0.000614452	0.0285324
ENSRNOG00000013220	Arhgap45	7:12541061-12741296	21.0496	39.6544	-0.799475	0.000615069	0.0285324
ENSRNOG00000015896	Rbpms2	8:71167305-71200536	2.78818	5.93776	-0.976873	0.000622461	0.0288286
ENSRNOG00000048428	LOC108348179	15:2733114-2735730	0.209941	0	8.04538	0.000627059	0.0289946
ENSRNOG00000049403	LOC108348294	13:43491967-43606509	1.76117	4.4197	-1.21587	0.000650067	0.0298626
ENSRNOG00000026577	Cpne4	8:113086413-113586418	0.102776	0.487435	-2.09159	0.000661286	0.0302837
ENSRNOG00000001514	Cdca7	3:59153280-59163913	14.7709	28.9575	-0.864335	0.000701056	0.0318502
ENSRNOG00000013280	Olfm4	15:62406873-62429449	22.4486	55.9662	-1.19823	0.000704681	0.0319641
ENSRNOG00000054420	Vdr	7:139342063-139394166	21.3441	14.0944	0.694394	0.000706024	0.0319744
ENSRNOG00000021507	Luzp2	1:111849998-113527735	0.111962	0.294605	-1.33623	0.000722329	0.0326611
ENSRNOG00000006079	Psd4	3:1478525-1514934	4.9169	9.44712	-0.839709	0.000749763	0.0338481
ENSRNOG00000029938	Pik3c2b	13:49850044-49911363	4.59169	9.42604	-0.968218	0.000758415	0.0341848
ENSRNOG00000011150	Arsb	2:23385183-23544963	80.054	53.7213	0.674727	0.000760772	0.0342371
ENSRNOG00000050295	Rnase17	15:28204224-28204691	2.13004	26.8128	-3.49067	0.000778191	0.0349112
ENSRNOG00000006549	Fndc9	10:31278834-31419638	1.34818	3.05525	-1.03125	0.000795021	0.0356105
ENSRNOG00000002217	Plac8	14:10692764-10714524	98.9972	201.698	-0.913383	0.000805808	0.0359606
ENSRNOG00000025724	LOC100909856	5:142797366-142842122	3.18853	1.68218	1.0216	0.00080627	0.0359606
ENSRNOG00000033575	Emid1	14:85355514-85400390	0.489165	1.90175	-2.00147	0.000806607	0.0359606
ENSRNOG00000008232	Spaca1	5:49424061-49439358	0	0.11739	-9.62325	0.000815482	0.0362122
ENSRNOG00000003999	Adcy3	6:28571351-28650148	5.31878	3.24265	0.803612	0.000819448	0.0363069
ENSRNOG00000028774	Vgll3	11:3119885-3164751	1.05493	0.371008	1.59558	0.000827887	0.0366241
ENSRNOG00000061764	AABR07021812.1	13:92569785-92672821	0.0348473	0.201961	-2.40598	0.0008437	0.0372208
ENSRNOG00000019128	St8sia4	9:103117506-103207190	9.86678	18.7311	-0.816581	0.000857311	0.0376349
ENSRNOG00000046968	Nol8	17:14565794-14589154	0.535313	1.97741	-1.79221	0.000862291	0.0377955
ENSRNOG00000046333	AABR07007032.1	1:277853875-278042312	5.94134	13.3724	-0.838594	0.00088326	0.038479
ENSRNOG00000009705	Lck	5:147750973-147761983	1.26782	4.26079	-1.64066	0.000905497	0.039234
ENSRNOG00000024986	Mmrn1	4:90990088-91038748	5.7655	10.739	-0.791831	0.000906074	0.039234
ENSRNOG00000004448	Acss3	7:49047013-49250957	3.80577	1.88678	1.06776	0.000911302	0.0394007
ENSRNOG00000032878	Cxxc5	18:28626366-28660992	7.84489	16.7796	-1.11657	0.000947391	0.0408377
ENSRNOG00000010183	Gask1b	2:178679041-178750668	17.5741	10.7927	0.693872	0.00096757	0.0415951
ENSRNOG00000020716	Axl	1:82549420-82580761	34.0901	21.6997	0.739767	0.00097168	0.0416339
ENSRNOG00000006932	AABR07029272.1	10:19465771-19574094	13.0568	25.258	-0.839021	0.000976912	0.0417557
XLOC_132731	XLOC_132731	7:66797671-66801081	0	0.147756	-7.80456	0.000977441	0.0417557
ENSRNOG00000001742	Clcn2	11:83883879-83897394	0	0.551727	-11.557	0.00100681	0.0428186
ENSRNOG00000007243	Havcr1	10:31813814-31849184	0.075658	0.661696	-3.09231	0.00101705	0.0431898
ENSRNOG00000013213	Epha4	9:83111222-83253458	2.25161	1.38934	0.798977	0.00102615	0.043512
ENSRNOG00000003835	Slc43a2	10:63677396-63719283	6.28035	11.2424	-0.737566	0.00103836	0.0439644
ENSRNOG00000012094	Ltbp2	6:108500112-108596569	5.38668	3.35319	0.755365	0.00104871	0.0442406
ENSRNOG00000001700	Whrn	5:79234950-79317206	0.811321	1.97598	-1.1823	0.00104952	0.0442406
ENSRNOG00000011913	Cp	2:104744461-104799853	27.1363	17.7134	0.70559	0.00106434	0.0446678
ENSRNOG00000005700	Nsg1	14:77380262-77401996	1.86332	4.95317	-1.29691	0.0010763	0.0450338
ENSRNOG00000024127	Atp13a5	11:74984613-75124249	0	0.011289	-9.42086	0.00108785	0.0453556
ENSRNOG00000012450	Dynlrb2	19:49016891-49028404	0.118406	0	9.38883	0.00111396	0.0461329
ENSRNOG00000017869	Irf8	19:54314865-54336640	16.9032	30.9002	-0.762114	0.0011199	0.0462537
ENSRNOG00000012819	Gdnf	2:56887987-56910238	0	0.068913	-9.38747	0.00112879	0.0464484
ENSRNOG00000022009	Mzb1	18:28436548-28438654	2.42127	11.0686	-2.09474	0.00112948	0.0464484
ENSRNOG00000005404	Rasgrp1	3:108984029-109044564	1.98329	4.31841	-1.01414	0.0011498	0.047216
ENSRNOG00000002829	Ppbp	14:18851631-18853315	18.1341	53.5445	-1.44949	0.0011704	0.0479243
ENSRNOG00000018260	Hrh2	17:10921507-10952441	0	0.0469993	-9.40428	0.00118509	0.0484565
ENSRNOG00000011320	Igfbpl1	5:61395408-61410812	0	0.029017	-7.68837	0.00120322	0.0490729
ENSRNOG00000032490	Cdh7	13:31081804-31231213	0.00888267	0	9.35349	0.00121773	0.0494379
ENSRNOG00000050128	AABR07035725.1	12:21424640-21450204	0	0.0567013	-9.39837	0.00123917	0.0501609
ENSRNOG00000012852	Bin1	18:25163561-25222135	6.84652	12.1641	-0.736366	0.00124079	0.0501609
ENSRNOG00000014317	Arpc5l	3:23297922-23318032	3.03461	13.9898	-1.38855	0.00125853	0.0507028
ENSRNOG00000049179	LOC100911519	1:213981845-213987053	0	1.0476	-11.3245	0.0012686	0.0509464
ENSRNOG00000016289	Bmpr1b	2:247403920-247446882	0.35995	0.079636	2.26411	0.00126912	0.0509464
ENSRNOG00000000386	Pbld1	20:27103317-27117663	0.0266583	0	7.57498	0.0012726	0.0510143
ENSRNOG00000013654	Cbln2	18:83777665-83782930	1.97394	7.26489	-1.76514	0.00127594	0.0510346
ENSRNOG00000053772	Klra22	4:164384704-164406146	0	0.06569	-9.31025	0.00127667	0.0510346
ENSRNOG00000012932	Ccdc146	4:10295122-10421415	0.411192	1.20733	-1.44177	0.00129331	0.0516277
ENSRNOG00000008851	Slc35b4	4:61550995-61573003	8.93703	16.5878	-0.783206	0.00133515	0.0530626
ENSRNOG00000053115	Zfp82	19:14459450-14472715	0	0.106403	-9.29046	0.00133722	0.0530626
ENSRNOG00000056574	Tigit	11:61970976-61987760	0	0.088237	-9.32661	0.00133907	0.0530626
ENSRNOG00000042962	Pdss2	20:47966583-48192743	3.89339	6.0713	-1.32433	0.00134348	0.0531122
ENSRNOG00000010688	Nrgn	8:40015049-40023559	4.88995	13.9645	-1.42447	0.00135718	0.0534574
ENSRNOG00000000451	RT1-Ba	20:4066132-4070721	0.888101	5.09536	-2.34733	0.00135782	0.0534574
ENSRNOG00000015445	Mal	3:120209647-120233655	1.36376	3.50192	-1.25504	0.00136285	0.0535083
ENSRNOG00000051499	Tcf3	7:12144162-12168410	31.7052	53.6365	-0.66148	0.00139167	0.0542674
ENSRNOG00000003480	Aim2	13:91954138-91962588	0.96734	3.9154	-2.24271	0.00142138	0.0552754
ENSRNOG00000007038	Cntn5	8:7814895-8524643	0.00698633	0	11.1393	0.00142798	0.0553816
ENSRNOG00000034240	Bcor	X:11648989-11691099	8.55393	14.9524	-0.7048	0.00143393	0.0555292
ENSRNOG00000009271	Smarca4	8:22648323-22739468	27.1002	45.9058	-0.660006	0.00143566	0.0555292
ENSRNOG00000019607	Bglap	2:187741770-187742747	323.308	635.281	-0.87872	0.00144079	0.0556129
ENSRNOG00000004405	Pigr	13:47572219-47591699	0.00310633	0.159657	-5.40739	0.00144171	0.0556129
ENSRNOG00000048230	LOC300308	7:20262680-20480453	0	0.00609067	-9.23755	0.0014497	0.0558147
ENSRNOG00000057335	Clec1b	4:163162211-163171790	5.45213	15.5406	-1.34161	0.00145089	0.0558147
ENSRNOG00000026310	Marchf1	16:25001666-25192675	2.96605	5.55546	-1.16201	0.0014528	0.0558147
ENSRNOG00000002304	Tnfrsf13b	10:47412582-47423149	0.456104	2.52068	-2.92063	0.00145723	0.0559099
ENSRNOG00000025209	Plxnd1	4:147854309-147893992	19.2376	32.506	-0.65524	0.00149848	0.0572625
ENSRNOG00000000454	RT1-DOb	20:4020317-4026677	0.0811917	1.10938	-3.47332	0.00151882	0.0578081
ENSRNOG00000046660	Gpc6	15:102164751-103170847	12.042	8.2872	0.635168	0.00152761	0.0580655
ENSRNOG00000014862	Gabrg3	1:112158519-112811936	0.00670567	0	11.0561	0.00154755	0.0586823
ENSRNOG00000005196	Slc12a6	3:103753238-103852686	11.0612	21.7491	-0.839703	0.00154794	0.0586823
ENSRNOG00000012238	Clec3a	19:46646253-46743593	305.907	209.233	0.65747	0.00155258	0.0587804
ENSRNOG00000050035	Sall4	3:165520392-165537940	0	0.02142	-7.42629	0.00156815	0.0592916
ENSRNOG00000018238	Nuggc	15:49010492-49055237	0.039171	0.756483	-4.14311	0.00160814	0.0606432
ENSRNOG00000059953	AABR07065656.10	6:138908677-138939716	0	0.046716	-9.17544	0.00163454	0.0615576
ENSRNOG00000012573	Dlgap2	16:79872323-79973877	0	0.0120753	-9.12688	0.00163729	0.0615802
ENSRNOG00000042592	Rgs10	1:199782078-199823386	22.946	38.1159	-0.631148	0.00164491	0.0617856
ENSRNOG00000011762	Elf1	15:61826711-61868343	19.348	33.1436	-0.667732	0.00165366	0.0619518
ENSRNOG00000047464	AABR07060886.1	4:98481520-98542683	0.960972	3.841	-1.90969	0.00166317	0.0622114
ENSRNOG00000031628	AABR07006688.2	1:248210041-248214063	0.0780963	0	7.27224	0.00168433	0.0627721
XLOC_027526	XLOC_027526	11:85445279-85469795	0.409891	2.5234	-2.53674	0.00168808	0.0628298
ENSRNOG00000025297	Gpr171	2:149317697-149325926	0.271331	1.54562	-2.39712	0.00170135	0.0631452
ENSRNOG00000061132	LOC103694210	18:44029927-44141865	0	0.0117737	-9.15351	0.00170537	0.0631452
ENSRNOG00000028377	Mpl	5:137269480-137281298	1.61065	5.14239	-1.56648	0.00172385	0.0636647
ENSRNOG00000004284	Btg1	7:37812831-37815088	96.6479	173.908	-0.741501	0.00173182	0.0638763
ENSRNOG00000034013	Acaca	10:71502775-71719910	21.3166	12.3991	0.872687	0.00174187	0.0640819
ENSRNOG00000003614	Mgat5	13:43764988-44157924	7.20786	14.8761	-0.930339	0.00176969	0.0649386
ENSRNOG00000016378	Map3k8	17:56109549-56129919	2.10932	4.91263	-1.11282	0.00178587	0.0653646
ENSRNOG00000010431	Msh4	2:260057855-260108897	0	0.0250543	-9.13553	0.0018067	0.0657907
ENSRNOG00000018985	Grk2	1:219536220-219544328	37.225	67.6917	-0.752668	0.00182033	0.0662026
ENSRNOG00000016278	Ccl17	19:10619032-10620671	0.075697	1.38095	-3.98237	0.0018388	0.0666204
ENSRNOG00000034007	Nr3c2	19:34448289-34752695	0.805823	1.95397	-0.816962	0.00186372	0.0670142
ENSRNOG00000002659	Ciita	10:5213350-5260608	0.364457	1.12294	-1.48357	0.00186633	0.0670241
ENSRNOG00000031979	Mt-atp6	MT:7919-8599	1638.11	354.88	2.27788	0.00187252	0.0670781
ENSRNOG00000049749	Med22	3:5453614-5458782	0	0.806236	-10.9361	0.0018941	0.0675326
ENSRNOG00000000691	Foxn4	12:48101673-48121270	0.0179373	0	7.4081	0.00191188	0.0680619
ENSRNOG00000018427	Lhx3	3:3654755-3661810	0.0474887	0	7.24716	0.00191431	0.0680638
ENSRNOG00000003616	Grem2	13:92894431-92988137	0.361079	0.098226	1.95659	0.00192096	0.0682157
ENSRNOG00000009471	Epsti1	15:60084918-60190363	6.06891	11.9471	-0.866403	0.00194397	0.0687766
ENSRNOG00000006324	Trpc6	8:6811543-6917535	1.69352	3.0979	-0.798101	0.00195747	0.0691689
ENSRNOG00000002579	Parm1	14:17969219-18076907	1.17407	2.31614	-0.86925	0.0019779	0.0698044
ENSRNOG00000017181	Malt1	18:61109069-61162445	2.57386	5.05855	-0.864219	0.00198566	0.069992
ENSRNOG00000011076	Ank2	2:231226949-231711386	1.85372	3.78317	-0.955696	0.00201631	0.0709197
ENSRNOG00000047002	Fstl5	2:174542667-175233457	0	0.00583767	-10.8885	0.00201693	0.0709197
ENSRNOG00000056781	Cfap221	13:35953088-36022197	0.228785	0.049155	2.2839	0.00202154	0.0709945
ENSRNOG00000032576	Nlgn1	2:111057291-111793326	0.00529367	0	10.7918	0.00205046	0.0718339
ENSRNOG00000013791	Enpp3	1:21613148-21684480	4.89637	3.16655	0.733284	0.00207102	0.0722006
ENSRNOG00000060202	LOC108348110	4:162672073-162680757	0.116614	0	8.96263	0.00208519	0.0726061
ENSRNOG00000034191	Fmo1	13:80712882-80745347	6.83929	3.42152	1.08358	0.00209746	0.0729448
ENSRNOG00000051854	Enpep	2:233667254-233743866	8.75561	5.77729	0.693713	0.00210858	0.0732425
ENSRNOG00000025324	Spire1	18:63226557-63357298	6.40111	4.18806	0.676408	0.00211972	0.0735403
ENSRNOG00000038496	Tex21	6:99236653-99274269	0	0.031919	-8.94577	0.00218576	0.0756275
ENSRNOG00000012439	Bid	4:153442218-153465203	8.51946	16.3618	-0.829153	0.00218781	0.0756275
ENSRNOG00000045636	Fasn	10:109987735-110005901	58.038	29.3453	1.06995	0.00220999	0.0762102
ENSRNOG00000055843	Zik1	1:63286802-63293635	0	0.584709	-10.7927	0.00221467	0.0762349
ENSRNOG00000011589	Camk2d	2:230901126-231132039	7.08321	12.1104	-0.682001	0.00221604	0.0762349
ENSRNOG00000018895	Mchr1	7:122456799-122459960	0	0.0960977	-7.14064	0.00225894	0.0776176
ENSRNOG00000016421	Tyr	1:151012598-151106802	0	0.0110317	-8.91152	0.00226188	0.0776255
ENSRNOG00000003217	Lgals3bp	10:107415326-107424710	61.4312	36.8025	0.818067	0.00227539	0.0779014
ENSRNOG00000027697	Nmnat2	13:70379346-70559630	0.746211	0.317216	1.19802	0.00230176	0.0785617
ENSRNOG00000013994	Enpp1	1:21748261-21813371	22.6037	15.4152	0.647156	0.00232928	0.0792731
ENSRNOG00000001128	Tesc	12:44043914-44174583	1.79107	5.41758	-0.974944	0.00238254	0.080702
ENSRNOG00000005662	Grm7	4:142780987-143367578	0	0.00682867	-10.7333	0.00239545	0.0809475
ENSRNOG00000042193	AABR07034729.1	11:85263536-85430845	2.94411	8.15879	-1.43586	0.00244379	0.0821931
ENSRNOG00000002350	Eaf2	11:66878658-66923092	0.0723173	1.04867	-3.77376	0.00249418	0.0837892
ENSRNOG00000024000	Cd22	1:89314558-89329418	2.297	6.56953	-1.39226	0.00250548	0.0840702
ENSRNOG00000001963	Mx2	11:38035450-38059950	1.68825	0.556127	1.66611	0.00252541	0.0846171
ENSRNOG00000008514	Plcz1	4:174125178-174180729	0	0.0205393	-9.0039	0.00252769	0.0846171
ENSRNOG00000004018	Tdrd5	13:73872621-73921969	0.065262	0.436077	-2.57996	0.00253526	0.0847714
ENSRNOG00000037563	Cd68	10:56249548-56270640	64.8091	43.6092	0.66631	0.00253984	0.0848252
ENSRNOG00000046261	Acp5	8:23142734-23148396	850.007	573.766	0.659008	0.00264528	0.0880365
ENSRNOG00000037632	LOC688553	14:89253373-89273137	0.512626	1.81886	-1.72039	0.00264829	0.0880365
ENSRNOG00000056826	Arap2	14:48726045-48922983	3.2466	5.7983	-0.879625	0.00271633	0.0897768
ENSRNOG00000026371	Krt17	10:88118001-88163723	0.0422433	0	8.91561	0.00274701	0.0904709
ENSRNOG00000012663	Mfsd6	9:53626592-53710817	1.49029	3.69146	-1.45	0.00277314	0.0909195
ENSRNOG00000017198	Hif3a	1:78976318-78997869	0.767132	0.18016	2.16493	0.00284653	0.0931125
ENSRNOG00000014751	Ret	4:150202058-150244372	1.09061	0.436386	1.41161	0.00286988	0.0937692
ENSRNOG00000046643	Cyp3a9	12:19074583-19114399	0.0267143	0	8.81162	0.00289325	0.0943173
ENSRNOG00000019005	Pde8a	1:143036218-143159433	6.13778	4.17632	0.646251	0.0029088	0.0945013
ENSRNOG00000057264	Tex49	7:140248852-140270340	0	0.0432397	-8.71831	0.00293806	0.0953438
ENSRNOG00000002093	Tgfbr3	14:3437290-3682545	17.4041	10.9388	0.763445	0.00294696	0.0955241
ENSRNOG00000033064	Edil3	2:17616096-18128512	18.2035	12.9757	0.591363	0.00295029	0.0955241
ENSRNOG00000012727	Trpc7	17:8135251-8279515	0.00613833	0	8.73454	0.00295968	0.0955676
ENSRNOG00000033733	Ccdc81	1:154064256-154111725	0.0196677	0	8.75982	0.00296166	0.0955676
ENSRNOG00000014021	Matn4	3:160838632-160853650	3.33695	7.68084	-1.09407	0.00301826	0.0970659
ENSRNOG00000049470	Tex12	8:54992841-54994871	0.133291	0	7.05916	0.00306469	0.0984485
ENSRNOG00000051235	C2	20:4542340-4561152	35.9011	23.9687	0.673593	0.0030833	0.0987859
ENSRNOG00000004444	Ikzf1	14:91782354-91867424	41.399	69.2283	-0.637792	0.00308555	0.0987859
ENSRNOG00000021095	Fxyd3	1:89502562-89510797	5.95608	2.24823	1.60186	0.00311087	0.0994851
ENSRNOG00000013589	Cxcl12	4:149260270-149273891	141.072	87.6102	0.795269	0.00311735	0.0995812
ENSRNOG00000021161	Fermt3	1:222254184-222272285	43.9256	71.3179	-0.600235	0.00314586	0.100229
ENSRNOG00000025938	Lin28b	20:50486809-50564987	0.038334	0	10.414	0.00314888	0.100229
ENSRNOG00000008904	Fli1	8:33543258-33661049	17.9689	31.3347	-0.694445	0.00315162	0.100229
XLOC_013661	XLOC_013661	1:197269211-197482259	0.292824	0.755624	-1.12289	0.00317869	0.100865
ENSRNOG00000004198	Stxbp6	6:65089318-65319527	2.45999	1.65897	0.669253	0.00322592	0.1018
ENSRNOG00000016374	Fgfr2	1:200590953-200696928	15.4469	10.7425	0.614258	0.00326727	0.102991
ENSRNOG00000014117	Hmox1	19:14508616-14515456	67.5931	42.159	0.766208	0.0032772	0.10319
ENSRNOG00000056221	AABR07040839.1	X:111735820-111746536	0	0.100821	-8.69481	0.00330326	0.103886
ENSRNOG00000045548	Entpd7	1:262987957-263000254	1.33434	0.00250033	9.12017	0.00335166	0.105188
ENSRNOG00000004476	Wif1	7:63094911-63165159	21.5085	14.1817	0.692333	0.00339501	0.106431
ENSRNOG00000009440	Gucy1b2	15:45479658-45550285	0	0.0236207	-7.05263	0.00340276	0.106558
ENSRNOG00000003562	Susd4	13:101181994-101307908	0.135226	0.411698	-1.49668	0.00343557	0.107416
ENSRNOG00000055365	Edem1	4:140886545-140915779	23.5506	42.8866	-0.773291	0.00343867	0.107416
ENSRNOG00000031168	Arhgap15	3:28627084-29236219	9.01414	18.6105	-0.931395	0.00345183	0.107624
ENSRNOG00000008137	Cdk18	13:48893412-48927483	2.61944	1.30344	1.098	0.00346838	0.1079
ENSRNOG00000027767	Slc38a5	X:14963921-14972675	25.9364	13.6748	0.999409	0.00346977	0.1079
ENSRNOG00000014844	Kif21a	7:132071116-132143470	5.7862	3.198	0.792516	0.00357567	0.110881
ENSRNOG00000005342	Rassf5	13:47956790-48022333	7.66176	14.0491	-0.762424	0.00361377	0.111738
ENSRNOG00000009433	Mcub	2:230199343-230273709	1.70021	3.1594	-0.799058	0.00361502	0.111738
ENSRNOG00000013228	Scrg1	16:36125904-36161089	17.5652	11.5607	0.695459	0.00362641	0.111969
ENSRNOG00000008943	Penk	5:17056419-17061837	14.3764	6.63338	1.21287	0.00364704	0.112372
ENSRNOG00000023708	Tmem176a	4:78458625-78462423	21.9793	11.2504	1.06157	0.00365171	0.112372
ENSRNOG00000008602	Steap4	4:23090029-23135354	26.3442	16.3555	0.78966	0.00365517	0.112372
ENSRNOG00000022110	Gcsam	11:60170985-60180118	1.50245	4.66987	-1.53305	0.00366565	0.112558
ENSRNOG00000023086	LOC100360828	8:81949877-81968589	45.125	25.9519	0.887628	0.00366909	0.112558
ENSRNOG00000018461	Pdgfrb	18:56364620-56406381	21.332	14.6751	0.680592	0.00369323	0.113056
ENSRNOG00000016262	Dnase2b	2:252436332-252451999	5.13256	2.58772	1.08006	0.00374683	0.114452
ENSRNOG00000034246	Rps27a	5:138628482-138629026	303.251	162.777	1.00514	0.00376172	0.11454
ENSRNOG00000017671	Rasa3	16:81318633-81434363	24.2872	39.3576	-0.591974	0.00380024	0.115468
ENSRNOG00000027522	Slc25a54	2:211880262-211925681	0.0170443	0	8.5173	0.00380545	0.115503
ENSRNOG00000061664	LOC502908	4:165094640-165118062	0	0.0350433	-8.49622	0.00384713	0.116645
ENSRNOG00000027869	Sox5	4:178066165-178441547	6.69671	4.797	0.593344	0.0038542	0.116735
ENSRNOG00000006068	Tmem117	7:136182224-136403012	1.52688	2.59687	-0.672719	0.00386538	0.116939
ENSRNOG00000023143	Nlrp1a	10:57692474-57822498	2.94067	5.34861	-0.748952	0.0038691	0.116939
ENSRNOG00000018760	Mpp7	17:60041968-60250352	2.05739	4.01837	-0.834094	0.00392051	0.118243
ENSRNOG00000032728	LOC689230	11:67329657-67337948	0.149299	1.46554	-3.1477	0.00394681	0.118834
ENSRNOG00000008560	Ccdc30	5:138364167-138463057	0.179724	0.624369	-2.24154	0.00408459	0.12229
ENSRNOG00000013554	Treml2	9:14657148-14669462	2.43521	6.01944	-1.34079	0.00410753	0.122848
ENSRNOG00000011068	Papss2	1:251145253-251230715	50.5909	36.1542	0.583984	0.00411703	0.123004
ENSRNOG00000019413	Atg16l2	1:166334979-166413564	2.49761	4.98474	-0.981336	0.00414464	0.123488
ENSRNOG00000018226	Zcchc14	19:53647815-53688597	9.91262	6.61931	0.677687	0.00415677	0.123488
ENSRNOG00000006410	Akap5	6:99356509-99361909	0.0686147	0.696584	-3.19326	0.00416283	0.123488
ENSRNOG00000015906	Tgif1	9:119125506-119190698	6.39667	12.3882	-1.02363	0.00416344	0.123488
ENSRNOG00000031515	Klra2	4:165385160-165460092	0.953032	2.3677	-1.07724	0.00421246	0.124678
ENSRNOG00000024452	Carmil2	19:37652969-37668019	1.11437	3.12843	-1.37956	0.00422751	0.124871
ENSRNOG00000014714	Trpv6	4:70918632-70934295	0	0.0148367	-6.74927	0.00425074	0.125427
ENSRNOG00000010646	Tmem229b	6:102152147-102196138	6.15191	10.9967	-0.725681	0.00428164	0.126209
ENSRNOG00000020410	Th	1:216073031-216080287	0	0.0377273	-6.94454	0.00438748	0.128845
ENSRNOG00000003357	Col3a1	9:52023295-52059217	173.49	294.977	-0.661137	0.00439368	0.128848
ENSRNOG00000009533	Erich3	2:260997497-261032821	0.353189	0.0622337	2.58657	0.00441026	0.12907
ENSRNOG00000013862	Dusp2	3:119776925-119779099	2.28118	9.26829	-1.9044	0.00441978	0.129206
ENSRNOG00000018434	Stab1	16:7222067-7250924	12.5562	8.13056	0.71402	0.00442395	0.129206
ENSRNOG00000004302	Pah	7:28066635-28129769	0.011001	0	8.37762	0.00447667	0.130613
ENSRNOG00000003088	Arhgap31	11:64601029-64714252	15.6897	11.2916	0.569077	0.00464934	0.134963
ENSRNOG00000033402	Gsta6	9:27475273-27533910	1.15047	1.86327	-1.15884	0.00466887	0.135393
ENSRNOG00000004147	Abca8a	10:98319480-98390384	4.02142	2.65129	0.693816	0.00472115	0.136248
ENSRNOG00000008996	Dpysl5	6:26939697-27024129	0.065653	0.010725	2.68699	0.00472217	0.136248
ENSRNOG00000045965	N4bp3	10:37089940-37099004	0	0.291643	-10.1349	0.00481033	0.138652
ENSRNOG00000001424	Cux1	12:23150956-23445074	11.7832	17.8843	-0.66441	0.00484951	0.13964
ENSRNOG00000020368	Fbxl12	8:21656639-21661259	4.14542	10.9241	-1.29548	0.00487362	0.140194
ENSRNOG00000017635	Inpp5a	1:211732348-211921099	10.2246	16.4505	-0.591955	0.00488293	0.140321
ENSRNOG00000008095	Onecut1	8:81766041-81793577	0.023204	0	8.233	0.00489897	0.140499
ENSRNOG00000020950	Syvn1	1:221409271-221417886	8.47385	16.6681	-0.87235	0.00499734	0.142799
ENSRNOG00000043176	AABR07059308.1	4:14071507-14113255	68.5323	38.0189	0.994301	0.00502691	0.142994
ENSRNOG00000012697	Spaca9	3:7269853-7278758	0.0717077	0	8.25443	0.00503121	0.142994
ENSRNOG00000010861	Atad1	1:251235508-251387002	9.67184	16.1282	-0.624485	0.00504091	0.142994
ENSRNOG00000024521	Spata16	2:112281376-112659927	0.00581367	0	10.0794	0.00507756	0.143465
ENSRNOG00000046254	Adgre1	9:9431860-9585865	8.31653	5.87381	0.592365	0.00510669	0.144146
ENSRNOG00000008865	Stac	8:119821901-119889661	0.100217	0.395852	-1.86682	0.00514881	0.145191
ENSRNOG00000037137	Svip	1:107301528-107373807	8.89539	7.04716	0.686144	0.00515959	0.145351
ENSRNOG00000025959	Gp1ba	10:57260680-57263546	3.8213	11.6697	-1.50361	0.00516463	0.145351
ENSRNOG00000037339	Siglec10	1:98512625-98521706	3.87009	9.66677	-1.19214	0.00520977	0.146334
ENSRNOG00000008941	Ets1	8:33816386-33879625	23.7243	38.505	-0.593143	0.0052172	0.146399
ENSRNOG00000000368	Grik2	20:53789760-54517709	0.193933	0.0918063	1.17288	0.00522387	0.146442
ENSRNOG00000004437	Map2k6	10:98706960-98823287	1.84907	3.12506	-0.662703	0.00526244	0.147235
ENSRNOG00000030449	Gsta4	8:85497557-85518879	38.6979	20.8067	0.872257	0.00529561	0.148019
ENSRNOG00000004726	Mapkapk2	13:47785161-47831110	40.8078	65.6375	-0.580132	0.00531445	0.14825
ENSRNOG00000028344	LOC103694874	20:13670066-13678089	0	0.287281	-10.0021	0.00531943	0.14825
ENSRNOG00000010663	Col6a5	8:114529016-114617466	0.371696	1.0374	-1.49732	0.00533064	0.148306
ENSRNOG00000012684	Bloc1s2	1:263913133-263920962	6.79648	17.5553	-1.24449	0.0053366	0.148306
ENSRNOG00000008704	Nlk	10:65840052-65993934	5.43912	10.1717	-0.804219	0.00535261	0.148448
ENSRNOG00000037923	Dmrtc1c1	X:72684329-72691535	0	0.0538257	-6.60287	0.00536575	0.148528
ENSRNOG00000014758	Lgi1	1:256955652-256999253	0.0600387	0.593285	-2.33902	0.005373	0.148585
ENSRNOG00000003915	Pacc1	13:110007010-110031895	4.90858	8.77061	-0.739586	0.00543975	0.150286
ENSRNOG00000056358	Ccdc27	5:171312793-171327450	0	0.014919	-6.68203	0.005445	0.150286
ENSRNOG00000025515	Ear1	15:28260411-28260866	2.75038	35.9998	-3.54938	0.00547861	0.151068
ENSRNOG00000004208	Crim1	6:788548-960703	15.5034	11.1446	0.569131	0.00552214	0.15211
XLOC_038101	XLOC_038101	13:91802920-91830365	3.22587	0.597597	2.29456	0.00552702	0.15211
ENSRNOG00000004890	Adcy8	7:105353913-105592804	0.00864433	0	9.98812	0.00555572	0.152702
ENSRNOG00000011591	Mettl21c	9:50750971-50762082	0	0.0656567	-8.36884	0.00555919	0.152702
ENSRNOG00000001739	Meltf	11:72135668-72157522	8.56124	5.31013	0.783443	0.00556543	0.152727
ENSRNOG00000014828	Avpi1	1:261365590-261371508	14.1579	7.30992	1.03941	0.0055801	0.152982
ENSRNOG00000008061	Nuak1	7:25038069-25113664	5.7795	10.522	-0.701406	0.00561519	0.15365
ENSRNOG00000006003	Ctnna2	4:107881826-108008484	0.016311	0	9.88058	0.00568553	0.155408
ENSRNOG00000050430	Vav1	9:9617786-9675110	13.4559	22.7476	-0.647262	0.00569029	0.155408
ENSRNOG00000005883	Nek10	15:11632759-11812485	0.886032	1.7739	-0.88174	0.00573726	0.15629
ENSRNOG00000018233	Gas6	16:81213364-81243757	50.6728	35.3876	0.625574	0.005776	0.157149
ENSRNOG00000020196	Scgb1a1	1:225279676-225283326	0.164005	0	8.14431	0.00580809	0.157872
ENSRNOG00000010986	Cmtm7	8:122787283-122841477	12.4552	20.1943	-0.745475	0.00581411	0.157886
ENSRNOG00000013177	Map3k1	2:43329516-43393207	6.11408	10.0014	-0.611044	0.00582575	0.158052
ENSRNOG00000013953	Ntrk1	2:187143568-187160373	0	0.013293	-6.52883	0.00587172	0.159148
ENSRNOG00000013017	Arnt2	1:146399217-146556171	1.05878	0.605148	0.887642	0.00590155	0.159249
ENSRNOG00000002730	Rgs5	13:87966758-88003035	21.4884	35.0281	-0.607983	0.00590327	0.159249
ENSRNOG00000033527	Pappa1	5:80920568-81150940	3.97841	2.77395	0.615098	0.00592719	0.159655
ENSRNOG00000046401	AABR07065886.1	6:143701600-143702033	0.028928	1.39992	-4.89315	0.00593012	0.159655
ENSRNOG00000011211	Pex5l	2:119330080-119537837	0	0.00986	-9.91424	0.00593506	0.159655
ENSRNOG00000009263	Ifi27	6:127327959-127334428	47.4681	31.1035	0.720225	0.0059783	0.160667
ENSRNOG00000037765	Lims1	20:27954433-28002082	28.4438	47.5385	-0.619658	0.00605152	0.161901
ENSRNOG00000004317	Vipr2	6:143934288-144008072	0.580942	1.71165	-1.35537	0.00605215	0.161901
ENSRNOG00000057966	Smim31	16:26483463-26519092	2.79553	1.50312	0.992578	0.00605247	0.161901
ENSRNOG00000012820	Add3	1:273854248-273961982	8.96684	15.0932	-0.667674	0.00605953	0.161938
ENSRNOG00000028348	Lhx8	2:260574190-260596777	0.0262867	0	8.2032	0.00607112	0.162097
ENSRNOG00000010813	Tspan14	16:17538855-17595960	24.0523	39.1104	-0.593897	0.00611342	0.162922
ENSRNOG00000015359	Arhgap40	3:154996750-155041816	0	0.0130773	-8.07862	0.00612863	0.162978
ENSRNOG00000013656	Lpar1	5:75557042-75676584	18.0554	13.1375	0.551806	0.00613038	0.162978
ENSRNOG00000031397	Stk32b	14:77829400-78097919	0.271765	0.117721	1.27424	0.00613262	0.162978
ENSRNOG00000010797	Esm1	2:45104305-45113131	7.51408	3.36651	1.23777	0.00615432	0.163404
ENSRNOG00000051169	Clnk	14:76657311-76833161	0.175299	0.0168873	3.35565	0.00618317	0.163866
ENSRNOG00000009005	Slco2a1	8:111495331-111579152	8.02433	5.4485	0.665424	0.00620632	0.164327
ENSRNOG00000018599	Gga2	1:191951581-191984858	10.9917	17.8535	-0.600083	0.00621823	0.164429
ENSRNOG00000029141	Trabd2b	5:133221139-133420644	4.7587	3.35104	0.600231	0.00622168	0.164429
ENSRNOG00000004498	Scin	6:59976003-60054279	13.3038	9.43797	0.60387	0.00631816	0.166365
ENSRNOG00000060381	Col15a1	5:62840360-62950240	5.16667	8.29889	-0.6169	0.00635162	0.167092
ENSRNOG00000016780	RGD1310951	5:76860515-76997951	2.35457	3.91489	-0.628435	0.00637787	0.167628
ENSRNOG00000033609	Irx1	1:33910912-33916741	0.033989	0	6.60368	0.00654193	0.170723
ENSRNOG00000032240	Gbp5	2:248178389-248197160	1.02291	2.80545	-1.33593	0.00654333	0.170723
ENSRNOG00000048358	LOC102553010	17:32009809-32015071	0	0.141256	-8.34052	0.00655871	0.170813
ENSRNOG00000000636	Rtkn2	20:21932878-22004279	2.26995	4.75311	-0.963357	0.00659279	0.171389
ENSRNOG00000059182	Klrh1	4:163597635-163611383	0.045022	0	8.10155	0.00661899	0.171758
ENSRNOG00000010960	Ankh	2:80131563-80256954	53.9387	36.8181	0.635631	0.00663782	0.17209
ENSRNOG00000033933	Stfa3	11:67308943-67314172	0	0.126072	-8.15798	0.00665974	0.172258
ENSRNOG00000000902	Hsph1	12:6322668-6341902	32.1592	22.5326	0.604498	0.00666236	0.172258
ENSRNOG00000016358	Apba2	1:125367280-125548890	0.147466	0.0289327	2.36858	0.0066919	0.17271
ENSRNOG00000051447	Ly49s4	4:164470397-164691405	0.008378	0	9.72198	0.00672069	0.173297
ENSRNOG00000001757	Tm4sf19	11:71606239-71619167	5.18004	2.49762	1.12968	0.00675926	0.173978
ENSRNOG00000031453	Manbal	3:153491151-153520735	24.3784	17.2273	0.589936	0.00684106	0.175635
ENSRNOG00000027990	Crip1	6:137959171-137967042	34.4053	62.9602	-0.751911	0.00684204	0.175635
ENSRNOG00000051661	Ly49s5	4:164136199-164357619	0.0340563	0	7.93769	0.00685006	0.175683
ENSRNOG00000001518	Itga6	3:58443101-58515124	15.1906	25.2548	-0.622879	0.00688522	0.176324
ENSRNOG00000010872	Ckb	6:136142956-136145837	182.579	127.986	0.605148	0.00688978	0.176324
ENSRNOG00000028991	AC125757.1	5:2980046-2982603	0	0.0773907	-6.51902	0.00689733	0.176324
ENSRNOG00000003866	Cxcr4	13:45314933-45318878	39.174	70.274	-0.730647	0.00690378	0.176324
ENSRNOG00000031890	Ncam1	8:53839098-53901358	12.234	7.8786	0.717823	0.00693622	0.176784
ENSRNOG00000000858	Sapcd1	20:5014231-5020150	0.248757	4.33209	-2.58095	0.0070171	0.178528
ENSRNOG00000009613	Sh3bgrl2	8:91070073-91160258	3.86003	6.39899	-0.625642	0.00705193	0.179254
ENSRNOG00000020129	Cdh3	19:38669230-38719677	0.243416	0.0612377	2.08457	0.0070644	0.179315
ENSRNOG00000009492	Trmo	5:61990328-62001196	6.91127	3.4198	1.10148	0.00706847	0.179315
ENSRNOG00000017286	Ephx2	15:42757235-42794279	2.54058	0.856353	1.65732	0.00708107	0.179315
ENSRNOG00000018659	Csf1	2:210522375-210550560	16.3428	10.8471	0.632554	0.00708565	0.179315
ENSRNOG00000010015	Gp9	4:119680112-119682547	2.96874	9.8628	-1.628	0.00710941	0.179753
ENSRNOG00000005888	Fsip1	3:109969152-110021149	0.776038	1.85976	-1.1511	0.00712806	0.179753
ENSRNOG00000014610	Anpep	1:141561334-141604273	43.6707	31.4107	0.5775	0.00713542	0.17978
ENSRNOG00000026855	Abhd12b	6:92568935-92596327	0	0.0745803	-9.74099	0.00725759	0.182376
ENSRNOG00000006732	Spo11	3:170994038-171013185	0.0136287	0.391561	-4.63197	0.00728851	0.182832
ENSRNOG00000023881	Skap1	10:84309430-84619050	0.344827	0.169706	1.09896	0.00729738	0.182895
ENSRNOG00000054458	Kcnmb4	7:59461799-59514939	0.559894	0.187962	1.69148	0.00738813	0.184523
ENSRNOG00000011944	Snx10	4:81311490-81374158	29.4615	21.4955	0.558359	0.00749409	0.186843
ENSRNOG00000016102	Ebf3	1:209523157-209641123	5.62547	3.72842	0.678612	0.00751281	0.186984
ENSRNOG00000000316	Sobp	20:47750762-47910375	7.18138	5.24029	0.551756	0.00754939	0.187498
ENSRNOG00000017775	Slc5a1	14:82909981-82975263	0	0.00799733	-7.89197	0.00755345	0.187498
ENSRNOG00000039197	LOC108348074	5:64476317-64542645	3.835	6.37833	-0.635437	0.00755726	0.187498
ENSRNOG00000052619	AABR07065680.1	6:139209909-139412601	0.177812	0.568755	-1.55193	0.00757082	0.187498
ENSRNOG00000016090	Mtmr10	1:125124743-125175857	6.73029	4.74265	0.604838	0.0075746	0.187498
ENSRNOG00000052510	Wnt10a	9:82053581-82066047	0.0421867	0	8.02939	0.00757544	0.187498
ENSRNOG00000046050	Dennd1c	9:9970209-9982810	3.59901	8.76817	-1.17909	0.00757932	0.187498
ENSRNOG00000049759	Nlrp2	1:73082977-73121085	0	0.0140523	-7.97292	0.00759604	0.187749
ENSRNOG00000013300	Atp5if1	5:150719569-150723321	202.931	142.019	0.603506	0.0076826	0.189614
ENSRNOG00000025895	Cavin2	9:55243255-55256340	7.13334	13.592	-0.818693	0.00768472	0.189614
ENSRNOG00000016659	Habp2	1:277068761-277104566	0	0.014001	-7.85822	0.00771491	0.189798
ENSRNOG00000029071	Unc5c	2:247248407-247397483	4.67321	3.16759	0.640931	0.0077202	0.189798
ENSRNOG00000004733	Wdr25	6:132805794-132933087	2.06796	2.97753	-0.95369	0.00772349	0.189798
ENSRNOG00000055402	AABR07017634.1	15:29400818-29446332	0	0.0118127	-7.87055	0.00772535	0.189798
ENSRNOG00000036829	Nckap1l	7:145068286-145113507	22.991	37.3436	-0.589322	0.00775445	0.19035
ENSRNOG00000052979	Rab17	9:98118908-98131883	0.037212	0	7.87795	0.00777324	0.1906
ENSRNOG00000043296	Abca14	1:189969336-190068948	0.00600933	0	7.87396	0.00777794	0.1906
ENSRNOG00000026848	Tex36	1:205615761-205669760	0.0432227	0	9.67365	0.00778551	0.190622
ENSRNOG00000002710	Cnst	13:97838361-97913082	6.18073	9.93101	-0.581237	0.0078041	0.190914
ENSRNOG00000016377	Cep55	1:256745288-256760796	2.88945	6.46005	-1.04754	0.00781874	0.191108
ENSRNOG00000006302	Gclc	8:85059051-85097468	38.1159	25.5354	0.661657	0.00785816	0.191908
ENSRNOG00000008471	Kif21b	13:52976507-53023103	5.26061	9.45644	-0.733196	0.00788319	0.192191
ENSRNOG00000054764	Flt3	12:9360672-9436570	1.53761	2.70339	-0.715458	0.00796245	0.193765
ENSRNOG00000017187	Prmt6	2:213173403-213178632	0	0.320192	-9.62466	0.00798902	0.194085
ENSRNOG00000049315	AABR07065827.1	6:143056734-143065639	1.17195	3.82031	-1.59363	0.00802058	0.194382
ENSRNOG00000023258	Nfkb1	2:240773456-240866689	15.1542	24.4669	-0.582077	0.00804224	0.194734
ENSRNOG00000026053	Grem1	3:105203309-105214989	10.3787	6.19134	0.83938	0.00812929	0.196352
ENSRNOG00000012061	Prkcb	1:192220934-192574831	11.8011	21.6487	-0.72864	0.00813814	0.1964
ENSRNOG00000007129	Cd8b	4:99185885-99202023	0.0626443	0.462204	-2.74146	0.00815084	0.19654
ENSRNOG00000003954	Il2rg	X:71162585-71169865	4.94186	13.7328	-1.34718	0.00817218	0.196756
ENSRNOG00000038004	Zfp804a	3:69549673-69573420	0	0.019667	-7.77302	0.00818065	0.196762
ENSRNOG00000028077	Cfap44	11:61162628-61234944	0.0665513	0.254328	-1.82566	0.00832348	0.199865
ENSRNOG00000023257	Adamts9	4:124660262-124858250	9.63946	6.88247	0.57348	0.00833241	0.199908
ENSRNOG00000014275	AABR07026291.1	16:70778913-70831953	6.66012	7.90337	-1.17773	0.0083584	0.200214
ENSRNOG00000020585	Tbxa2r	7:11253180-11257977	1.44089	4.87182	-1.64731	0.00835916	0.200214
ENSRNOG00000020525	Col5a3	8:21786324-21831668	5.25065	8.89648	-0.662448	0.00842671	0.201425
ENSRNOG00000007574	Padi2	5:159428515-159471144	5.29647	9.22386	-0.692847	0.00843083	0.201425
ENSRNOG00000017250	Gmpr	17:19543275-19580929	8.97344	15.0587	-0.640816	0.00847141	0.202048
ENSRNOG00000027225	Ly6g6f	20:5071062-5076586	1.58225	5.00285	-1.54708	0.00848415	0.202048
ENSRNOG00000018445	Agt	19:57321640-57333433	19.9762	6.28674	1.71617	0.00851745	0.202649
ENSRNOG00000033338	Gimap6	4:78336423-78342863	3.30189	8.0215	-1.17836	0.0085574	0.20343
ENSRNOG00000009760	Palm	7:12708015-12793711	16.4367	28.0207	-0.658072	0.00857751	0.203739
ENSRNOG00000007546	Asns	4:33743364-33761163	83.6916	54.3228	0.696672	0.00861822	0.20445
ENSRNOG00000005178	LOC689081	3:143188661-143192408	0.127074	0	7.87993	0.00868016	0.205665
ENSRNOG00000000168	Gatm	3:114711562-114728410	10.0801	17.4816	-0.68421	0.00877759	0.207459
ENSRNOG00000046250	LOC100911027	1:54719971-54748763	0.0536833	0	9.45931	0.00888057	0.209546
ENSRNOG00000004706	Vit	6:1147012-1208392	16.5022	12.0532	0.546501	0.00889112	0.209622
ENSRNOG00000042758	Tmem243	4:21901070-21920651	3.12195	9.63617	-1.72298	0.00907596	0.213453
ENSRNOG00000022373	Dennd4b	2:189629297-189642183	7.44153	13.5732	-0.76186	0.00920882	0.216222
ENSRNOG00000039323	Dgkk	X:16442899-16537888	0.00433933	0	7.58583	0.00922074	0.216325
ENSRNOG00000022631	Fgf5	14:12974921-12995584	0	0.021179	-7.65185	0.00935012	0.21918
ENSRNOG00000018991	Gsn	3:14467330-14508911	142.049	102.501	0.576056	0.009476	0.221777
ENSRNOG00000013178	Cmip	19:49759913-50000535	23.4351	36.7852	-0.556284	0.00947639	0.221777
ENSRNOG00000005053	Egln3	6:75050329-75075795	1.67956	3.8469	-1.0721	0.00948467	0.221789
ENSRNOG00000015867	Chst9	18:6834365-7081356	0	0.0064	-9.45727	0.00951474	0.222282
ENSRNOG00000017260	Cdr2	1:190889701-190914610	80.9711	50.8514	0.750509	0.00952382	0.222282
ENSRNOG00000023077	Cpne9	4:145238947-145262442	0	0.0228557	-7.90784	0.00952987	0.222282
ENSRNOG00000050687	LOC498759	17:47640704-47653989	0.0316447	0	7.71682	0.0095368	0.222282
ENSRNOG00000059215	Slc66a2	18:76770012-76805766	19.0237	12.7236	0.666062	0.00956902	0.222839
ENSRNOG00000049282	Oas2	12:41340815-41363161	0.831054	0.272694	1.71423	0.00957625	0.222839
ENSRNOG00000009848	Il18	8:54988056-55016299	9.00504	2.87766	1.60717	0.00973507	0.2258
ENSRNOG00000001766	Tfrc	11:71397383-71419223	298.935	201.354	0.649312	0.00983382	0.227906
ENSRNOG00000017488	Snx24	18:48201728-48355699	4.12382	2.98922	0.561835	0.0098658	0.228113
ENSRNOG00000012535	Adgrf4	9:20951260-20982487	0.0250833	0.162468	-2.54948	0.00988718	0.228403
ENSRNOG00000048933	LOC691918	3:112371677-112377706	0.23748	0	9.34693	0.00995127	0.229185
ENSRNOG00000028404	Ppp1r1b	10:86303727-86312762	12.0475	7.17069	0.840209	0.00995309	0.229185
ENSRNOG00000050860	Abcb11	3:55480024-55587946	0.167641	0.456978	-1.33024	0.0101004	0.2319
ENSRNOG00000037960	Stum	13:98718213-98772968	0.279891	0.965369	-1.45933	0.010124	0.2319
ENSRNOG00000011568	Rspo3	1:30681681-30766860	2.52566	1.60749	0.743567	0.0101912	0.233168
ENSRNOG00000020148	Il4i1	1:100830064-100836677	0.517229	2.2525	-1.99188	0.0102064	0.23332
ENSRNOG00000006084	Cngb3	5:33097654-33507467	0	0.00389333	-9.40797	0.0102142	0.23332
ENSRNOG00000001314	Fam20c	12:17913767-17972737	38.2423	26.6664	0.600527	0.0102757	0.234364
ENSRNOG00000026842	Nnt	2:52189529-52282548	21.5796	33.3927	-0.525537	0.0102762	0.234364
ENSRNOG00000008890	Slc18a2	1:280423079-280457148	0.740858	1.73928	-1.11696	0.0102931	0.234562
ENSRNOG00000003207	Fmnl1	10:91254058-91281418	18.398	32.0205	-0.688322	0.0103328	0.235099
ENSRNOG00000020206	Ctsd	1:215541542-215553451	160.491	118.874	0.526865	0.0103331	0.235099
ENSRNOG00000006418	Samhd1	3:153207562-153250665	7.07135	12.1511	-0.828769	0.0103958	0.235963
ENSRNOG00000005483	Rpap1	3:111565650-111587151	5.54739	9.55626	-0.688104	0.0104101	0.2361
ENSRNOG00000015148	Erc2	16:3258534-3679222	0.153794	0.478938	-1.344	0.0104277	0.236296
ENSRNOG00000032973	Il13ra2	X:118443823-118513061	5.77174	3.61928	0.75435	0.0104353	0.236296
ENSRNOG00000015863	Npsr1	8:25246292-25482647	0	0.005906	-9.36015	0.0105049	0.237685
ENSRNOG00000007255	Zpbp2	10:86514830-86523372	0.1932	0.778193	-2.59667	0.0105253	0.237771
ENSRNOG00000019118	Slc13a3	3:162084315-162147393	0.341214	0.112028	1.70417	0.0105689	0.238568
ENSRNOG00000005984	Etv6	4:167754525-167992168	8.36243	13.2657	-0.562284	0.0106186	0.239395
ENSRNOG00000011140	Prxl2a	16:17493953-17513870	8.33995	14.2796	-0.67159	0.0106392	0.239588
ENSRNOG00000030021	Ccl6	10:70797124-70802782	21.065	11.4859	0.986113	0.0106573	0.239805
ENSRNOG00000003781	Atp10b	10:28449335-28864255	0.003239	0	9.36856	0.0106985	0.240476
ENSRNOG00000028082	Tal2	5:70592871-70599428	0.0683673	0	7.80209	0.010726	0.240783
ENSRNOG00000028872	Rai14	2:60546091-60683451	11.0101	8.21088	0.515196	0.0107653	0.24125
ENSRNOG00000002831	Wfikkn2	10:81909285-81989708	0.458077	0.122676	3.05486	0.0107713	0.24125
ENSRNOG00000011059	Ttbk2	3:112677937-112789289	3.30674	4.49469	-0.75046	0.010772	0.24125
ENSRNOG00000002072	Eva1c	11:31002451-31075809	0.734006	0.337456	1.21434	0.0108927	0.243381
ENSRNOG00000049033	Racgap1	7:141277312-141307233	13.7362	22.7628	-0.636315	0.0109256	0.243927
ENSRNOG00000004229	Tac3	7:71023976-71030582	0	0.0628277	-7.57973	0.0109949	0.2449
ENSRNOG00000014964	Hp	19:42097995-42100804	33.9758	75.2593	-1.017	0.011068	0.246146
ENSRNOG00000019430	Coro1a	1:198123884-198128857	117.539	208.499	-0.710023	0.0110909	0.246463
ENSRNOG00000028470	Gdpd4	1:162890475-162969727	0	0.0169643	-9.30901	0.011142	0.246791
ENSRNOG00000020337	Sla2	3:152933714-153001309	2.48787	5.07747	-0.80379	0.0111448	0.246791
ENSRNOG00000006978	Mterf2	7:24638208-24648255	0.408356	1.55119	-1.81125	0.0111488	0.246791
ENSRNOG00000047225	Tma7	8:117815303-117830815	40.876	21.8678	1.01056	0.0111777	0.247239
ENSRNOG00000009730	Cyp7b1	2:102701903-102871257	2.31513	1.60134	0.593209	0.0112164	0.247503
ENSRNOG00000027784	Tsku	1:163317282-163328591	17.5372	11.0051	0.754403	0.0112175	0.247503
ENSRNOG00000032708	RT1-Bb	20:4039413-4049711	0.0909727	1.01602	-2.6998	0.0112454	0.247779
ENSRNOG00000031081	Stat2	7:2691369-2707741	7.58018	13.333	-0.70677	0.0112691	0.248111
ENSRNOG00000014555	Aox4	9:65110325-65167192	0	0.00705533	-7.49514	0.0112876	0.248291
ENSRNOG00000011523	Macroh2a1	17:9282675-9344678	58.9113	90.941	-0.521536	0.0112946	0.248291
ENSRNOG00000024210	Nlrc3	10:11810926-11842482	0.418128	1.21112	-1.3694	0.0113035	0.248294
ENSRNOG00000031287	Cacna2d3	16:4871650-5795825	0.389147	0.232251	0.821693	0.011336	0.248819
ENSRNOG00000013529	Stk4	3:160467552-160546540	26.1817	40.3767	-0.524643	0.0113626	0.249094
ENSRNOG00000057189	LOC103690326	7:78725717-78744581	4.72487	2.22451	1.15958	0.0113747	0.249094
ENSRNOG00000005830	Tafa4	4:129196659-129430251	0.00551533	0	9.1978	0.0114464	0.249933
ENSRNOG00000006715	Ccr1	8:132996649-133002201	17.2727	9.87021	0.907291	0.0114479	0.249933
ENSRNOG00000016041	Zc3h12d	1:1938419-1972918	1.22781	2.77029	-1.06601	0.0114888	0.250443
ENSRNOG00000001653	St3gal6	11:44192940-44237100	5.41289	8.71887	-0.58573	0.0115136	0.250793
ENSRNOG00000015615	Tnfrsf11a	13:25778317-25835957	3.997	2.64084	0.688333	0.0115677	0.25159
ENSRNOG00000003853	Scoc	19:24584433-24614019	13.631	7.70914	0.931115	0.0115677	0.25159
ENSRNOG00000005787	Erp27	4:170893946-170912629	1.22028	4.358	-1.83295	0.0116632	0.253324
ENSRNOG00000020388	Inpp5f	1:200037749-200116524	2.992	4.86221	-0.594633	0.0116776	0.253324
ENSRNOG00000005697	Slc6a11	4:146106386-146223228	0	0.01099	-9.24394	0.011776	0.25438
ENSRNOG00000017874	Cd53	2:209489279-209537087	31.4119	53.4262	-0.649967	0.0117975	0.254652
ENSRNOG00000014791	Peg3	1:70222964-70237443	45.4027	33.3058	0.544074	0.011855	0.255508
ENSRNOG00000011334	Tmem63c	6:111049559-111120799	0.231292	0.0304103	2.24344	0.011902	0.256134
ENSRNOG00000060934	Ptx4	10:14481393-14485916	2.82064	0.862508	1.81665	0.0119125	0.256168
ENSRNOG00000014251	Capn5	1:163073124-163129641	4.84866	7.09877	-0.600141	0.0119988	0.257636
ENSRNOG00000002951	Ccnb3	X:16337102-16402202	0.00508267	0	7.32444	0.0120661	0.258888
ENSRNOG00000007089	Lgmn	6:126282233-126320726	58.5224	43.6314	0.516503	0.0121093	0.259619
ENSRNOG00000002460	Serpinb2	13:27449934-27463010	0.535283	1.69152	-1.551	0.0121457	0.260205
ENSRNOG00000050220	Nrxn1	6:13886740-15191660	6.27088	4.31912	0.530962	0.0121991	0.26057
ENSRNOG00000026208	AABR07051260.1	3:4285388-4288536	0.104322	0	7.3245	0.0122392	0.26123
ENSRNOG00000005464	Lgalsl	14:105047919-105055421	13.4929	24.0969	-0.72965	0.0123125	0.262403
ENSRNOG00000050047	LOC100359907	14:7026769-7035539	0	0.0423733	-7.42718	0.0124417	0.264959
ENSRNOG00000048935	Tmem45al	11:46650652-46779493	0.414797	2.01555	-2.35748	0.0125047	0.265905
ENSRNOG00000017933	Ccdc3	17:76995043-77093508	17.2998	10.6239	0.801369	0.0125489	0.26645
ENSRNOG00000049629	Reep2	18:27632153-27641795	0.566489	2.02192	-1.6682	0.0126009	0.267021
ENSRNOG00000037190	Cd101	2:203374841-203413125	3.476	7.18058	-0.951096	0.0127798	0.269809
ENSRNOG00000008479	Slc8a1	6:4258991-4520604	7.08432	5.2763	0.515889	0.0127825	0.269809
ENSRNOG00000049452	Nebl	17:84140489-84488601	12.4716	8.94714	0.552533	0.0128351	0.27072
ENSRNOG00000014272	Rpl35	3:23294814-23297774	486.403	321.149	0.70331	0.0128843	0.270916
ENSRNOG00000016628	Scgn	17:43357888-43399321	0.028116	0	9.16627	0.0128917	0.270916
XLOC_018606	XLOC_018606	10:62350316-62351137	0.544549	5.85545	-3.2089	0.0128918	0.270916
ENSRNOG00000016502	Dscaml1	8:49737798-50055560	0.00367767	0	9.06121	0.0129191	0.271093
ENSRNOG00000054548	Srpk3	X:157008824-157013443	0.0768347	0.84387	-3.27749	0.0131234	0.274678
ENSRNOG00000053787	Mdfic	4:42202838-42282496	7.14571	5.17578	0.55683	0.0131379	0.274678
ENSRNOG00000026415	Col14a1	7:95074236-95273298	11.114	17.3444	-0.543291	0.0132021	0.275586
ENSRNOG00000038432	Sh2d1b2	13:88557860-88629060	2.67122	4.73265	-0.838249	0.0133636	0.277948
ENSRNOG00000051891	LOC100912564	17:43770250-43770561	2695.36	1986.32	0.533831	0.0133656	0.277948
ENSRNOG00000025130	Ltk	3:111553680-111560556	0.00231333	0.0725057	-4.66074	0.013381	0.277948
ENSRNOG00000016957	Igfbp2	9:80118029-80144789	0.061527	0.613077	-3.17734	0.0133926	0.277948
ENSRNOG00000016550	Dclk2	2:186116624-186245771	1.05676	1.87799	-0.954306	0.0133981	0.277948
ENSRNOG00000022309	Frem1	5:101020448-101166651	0.420666	0.781701	-0.874059	0.0134012	0.277948
ENSRNOG00000009735	Fibcd1	3:9998458-10031530	0.00961633	0	7.30123	0.0134114	0.277959
ENSRNOG00000003734	AABR07041600.1	X:134539398-134541531	0	0.538722	-9.08413	0.0134476	0.278454
ENSRNOG00000046258	B3gnt5	11:84919066-84931160	0.683124	2.13384	-1.5238	0.013529	0.279587
ENSRNOG00000014322	Kazn	5:160639578-161035531	2.8168	1.97705	0.606266	0.0135401	0.279613
ENSRNOG00000058405	AABR07061039.2	4:103049232-103050006	1.35554	0	8.9959	0.0136165	0.28018
ENSRNOG00000006966	Nfia	5:116420690-116751416	18.758	13.5283	0.556817	0.0136492	0.280652
ENSRNOG00000030093	Defa5	16:75338052-75415555	1013.94	2042.48	-0.876529	0.0137012	0.28152
ENSRNOG00000016467	Kctd1	18:6374778-6474990	1.6138	2.68083	-0.625485	0.0137954	0.283048
ENSRNOG00000027839	Ptk2b	15:42827310-42947656	10.3694	16.1186	-0.530328	0.0138152	0.283049
ENSRNOG00000010430	Tmem40	4:147644756-147670708	1.13524	2.93373	-1.24072	0.0138702	0.283566
ENSRNOG00000015024	Mcoln3	2:251983339-252007560	2.33962	1.19299	1.05679	0.0139157	0.284111
ENSRNOG00000001554	RGD1563888	11:17076980-17130120	7.15486	12.7758	-0.590404	0.0139167	0.284111
ENSRNOG00000005480	Ybx3	4:165606819-165630118	585.636	378.384	0.702854	0.0139942	0.285489
ENSRNOG00000054508	Foxp2	4:41364331-41942023	0.554049	0.335307	0.775624	0.01406	0.286095
ENSRNOG00000026914	Dnah1	16:7345978-7408265	0.180728	0.520631	-1.37962	0.0140675	0.286095
ENSRNOG00000022044	Cabp4	1:219383452-219388009	0.0998133	0.688542	-2.62914	0.0140738	0.286095
ENSRNOG00000059890	Clec2d2	4:162303516-162494575	1.3432	4.02487	-1.4185	0.0141396	0.287228
ENSRNOG00000046449	Npy	4:79573998-79581208	7.18639	16.4794	-1.08398	0.014227	0.28839
ENSRNOG00000048186	F2rl3	16:18812702-18820482	1.20503	3.88712	-1.58162	0.0142556	0.288765
ENSRNOG00000011550	Kcnab2	5:169572517-169658875	13.864	22.8978	-0.623361	0.014273	0.288912
ENSRNOG00000018958	Mt3	19:11324698-11326139	20.8073	47.5581	-1.08283	0.014342	0.28963
ENSRNOG00000057996	Phactr3	3:173798545-173871904	0.180508	0.0503253	2.16551	0.014349	0.28963
ENSRNOG00000033706	Klk14	1:99616447-99621037	0	0.081469	-7.38324	0.0143869	0.290031
ENSRNOG00000021329	Tas2r140	4:167201168-167202106	0	0.138788	-5.93418	0.014389	0.290031
ENSRNOG00000010266	Cd180	2:32820322-32833125	2.78302	5.93872	-0.99202	0.0144024	0.290095
ENSRNOG00000002845	LOC691286	10:43884466-43892604	0	0.0559477	-7.43219	0.0144228	0.290303
ENSRNOG00000020425	Stim1	1:167373678-167533420	10.9323	17.5397	-0.522238	0.0145166	0.291779
ENSRNOG00000033262	Reep6	7:12240060-12246729	6.87467	3.0259	1.25586	0.0146496	0.294247
ENSRNOG00000013526	Rassf4	4:148769096-148803988	17.758	13.2493	0.522292	0.014681	0.294326
ENSRNOG00000008203	Synpr	15:14559471-14737704	0.00956	0	9.0137	0.0146947	0.294326
ENSRNOG00000031146	Slco6d1	9:104756863-104870382	0.00885467	0	8.89497	0.0147566	0.295152
ENSRNOG00000018454	Apoe	1:80612895-80617057	95.1095	67.8722	0.566611	0.0147812	0.295438
ENSRNOG00000019890	Folr2	1:166915045-166919302	13.8665	7.33024	1.01081	0.0148147	0.295902
ENSRNOG00000027916	Txndc2	9:113354053-113358526	0	0.0690747	-7.17595	0.0149017	0.297018
ENSRNOG00000047642	AABR07051426.1	3:10893588-10922113	0.036106	0	8.98936	0.0149603	0.297839
ENSRNOG00000052069	AABR07065673.1	6:139158334-139210369	0.182647	0.655713	-1.75362	0.0149638	0.297839
ENSRNOG00000006782	RGD1560028	4:96252798-96329708	0.0132947	0	8.87	0.0150677	0.2997
ENSRNOG00000010053	Calcr	4:28627442-28702559	0.82524	0.294634	1.43518	0.0151315	0.30055
ENSRNOG00000002968	Tnfsf4	13:79269973-79293778	0	0.013673	-7.1689	0.0151994	0.301682
ENSRNOG00000003715	Srpx2	X:104734082-104760547	18.1118	13.3241	0.540057	0.0152095	0.301682
ENSRNOG00000002511	Flt4	10:35078726-35121599	7.71745	5.18499	0.657192	0.0152467	0.302209
ENSRNOG00000017681	Lim2	1:98495082-98501249	0	0.077305	-7.42963	0.0153329	0.302949
ENSRNOG00000038150	RGD1560394	14:82053685-82055290	0.234057	0	7.25846	0.0153369	0.302949
ENSRNOG00000003756	Lancl3	X:14358224-14490340	0.0534203	0.198853	-1.80081	0.015484	0.305607
ENSRNOG00000013237	AABR07027925.1	17:49322205-49469557	0	0.007407	-8.89438	0.0157756	0.309855
ENSRNOG00000015441	Il4r	1:196942364-196967220	6.27916	10.527	-0.635261	0.0157903	0.309855
ENSRNOG00000033280	Pam	9:111028575-111177602	37.6641	28.3124	0.505879	0.0157974	0.309855
ENSRNOG00000059140	Myo1g	14:86771870-86803376	13.4296	25.6069	-0.861457	0.0158056	0.309855
ENSRNOG00000008431	Gabbr2	5:62276100-62621737	0.055176	0.137805	-1.23237	0.0158193	0.309912
ENSRNOG00000021881	Metap2	7:34762231-34789479	78.282	56.9362	0.545104	0.0159259	0.311148
ENSRNOG00000012106	Dnaja4	8:59278262-59294003	30.0603	20.2701	0.650126	0.0160281	0.312374
ENSRNOG00000008885	Chst11	7:26645422-26859716	55.4386	41.0516	0.539785	0.0160323	0.312374
ENSRNOG00000026951	Susd5	8:122331583-122368368	58.9728	44.833	0.496576	0.0160498	0.312501
ENSRNOG00000030069	Faim	8:106816152-106827580	1.11576	0.025514	5.57571	0.0160714	0.31271
ENSRNOG00000031207	LOC500035	4:40161285-40169564	0.03417	0	7.06328	0.0161404	0.313559
ENSRNOG00000006328	Wwp1	5:33609136-33664435	16.271	11.8598	0.542482	0.0161423	0.313559
ENSRNOG00000058003	Spon1	1:178636544-178935051	6.97079	10.5826	-0.496282	0.0161479	0.313559
ENSRNOG00000002863	Cacna1e	13:71906702-72367980	0.219795	0.0839507	1.41783	0.0162062	0.314263
ENSRNOG00000010588	Tns2	7:143707237-143720595	18.8128	13.3212	0.589944	0.0164629	0.317919
ENSRNOG00000053430	Slco4a1	3:175838994-175857983	1.41452	3.29527	-1.10992	0.0164678	0.317919
ENSRNOG00000021560	Cass4	3:170399302-170438993	1.36711	2.59846	-0.828352	0.0164731	0.317919
ENSRNOG00000020284	Prkar2a	8:117486083-117546370	41.4742	29.1631	0.59064	0.0165132	0.318277
ENSRNOG00000001427	Orai2	12:23544287-23564569	4.69108	10.0012	-0.968466	0.0165874	0.319099
ENSRNOG00000053845	Hist1h2bl	17:44748482-44748862	683.18	433.457	0.743418	0.016599	0.319099
ENSRNOG00000055597	Hdac7	7:139281187-139318455	5.70797	8.9439	-0.550565	0.0166351	0.31955
ENSRNOG00000059538	Clec2g	4:162934195-162943981	61.4088	98.5222	-0.564742	0.0166774	0.319933
ENSRNOG00000052731	AABR07059243.1	4:10992342-10995792	0.273278	0	8.86108	0.0167333	0.320593
XLOC_032446	XLOC_032446	12:20184471-20332885	3.61167	7.89429	-1.03645	0.0167542	0.320762
ENSRNOG00000046159	Gns	7:65616177-65653052	26.537	19.2827	0.539077	0.0169776	0.323955
ENSRNOG00000052990	Cers5	7:141386391-141424343	6.75126	11.6521	-0.624976	0.0172545	0.328093
ENSRNOG00000032970	Gpr174	X:78372257-78399944	0.587023	1.46975	-1.20827	0.017308	0.328093
ENSRNOG00000005933	Yap1	8:6135493-6203579	17.4937	13.2715	0.491913	0.0173119	0.328093
ENSRNOG00000020420	Pklr	2:188449210-188459592	14.896	7.62658	1.00843	0.0173166	0.328093
ENSRNOG00000014641	Rpl3l	10:14094754-14105308	1.08575	9.0693	-2.91776	0.017332	0.328093
ENSRNOG00000057410	Klrb1	4:162774109-162792804	0	0.0529677	-8.7889	0.0173678	0.328218
ENSRNOG00000050066	AABR07051583.1	3:17507867-17560995	1.7654	7.37678	-2.13288	0.017373	0.328218
ENSRNOG00000024120	Rxfp1	2:178399274-178521038	0.167002	0.513878	-1.58765	0.0173902	0.32827
ENSRNOG00000019351	Chid1	1:214039481-214074663	2.3375	0.012073	7.72837	0.0174134	0.328331
ENSRNOG00000045617	Pglyrp3b	2:191900317-191915563	0	0.0645807	-8.78046	0.0174758	0.328866
ENSRNOG00000004265	Dipk2b	X:4691172-4739890	0.217575	0.616614	-1.40459	0.0175266	0.32938
ENSRNOG00000053258	Faim2	7:141157963-141185710	0	0.010658	-7.06313	0.0176178	0.330499
ENSRNOG00000050119	Try10	4:70655749-70659252	0	0.0929713	-7.16126	0.0176887	0.331556
ENSRNOG00000058568	Dhrs9	3:55623634-55648325	8.15465	5.41064	0.687214	0.0177159	0.331848
ENSRNOG00000015403	Cd52	5:152322916-152324469	86.7254	48.0565	0.918846	0.0177634	0.33252
ENSRNOG00000057245	Rbbp8nl	3:175645281-175654707	0	0.0130757	-5.88042	0.0178428	0.333135
ENSRNOG00000007077	Fem1b	8:67694904-67708304	23.7422	36.4185	-0.516898	0.0178719	0.33346
ENSRNOG00000050784	AABR07054000.1	3:134413170-134589527	0.771006	0.396406	1.05167	0.0179788	0.334816
ENSRNOG00000018488	Cd40	3:161519743-161534704	0.908303	2.33285	-1.25809	0.0179893	0.334816
ENSRNOG00000061705	Gp5	11:73015387-73017090	2.4425	8.29437	-1.65521	0.0179913	0.334816
ENSRNOG00000003134	Slc4a4	14:20479323-20920286	1.15992	1.90197	-0.607269	0.0181304	0.336966
ENSRNOG00000014879	Ttc7a	6:10912383-11014278	16.303	24.9844	-0.507725	0.0181954	0.337385
ENSRNOG00000008765	Zfhx4	2:98423569-98610368	6.45885	4.77115	0.529667	0.0182246	0.337385
ENSRNOG00000037079	Padi6	5:159241413-159256699	0	0.0202537	-7.15588	0.0182248	0.337385
ENSRNOG00000055089	Slc44a1	5:70245843-70424112	65.0653	49.7451	0.495424	0.0182316	0.337385
ENSRNOG00000003512	Gabra1	10:27310725-27366665	0.218047	0.587331	-1.34536	0.0182843	0.337853
ENSRNOG00000043151	Cntln	5:103024376-103367062	1.26483	2.4704	-0.852764	0.018337	0.338607
ENSRNOG00000014597	Irs1	9:88033668-88086488	17.9855	13.5417	0.50704	0.0183584	0.338784
ENSRNOG00000023661	Celf2	17:75307220-75654951	11.5003	23.9942	-0.974683	0.0184372	0.339376
ENSRNOG00000011250	Inmt	4:85381889-85386231	0.851089	0.15911	2.48488	0.0184497	0.339376
ENSRNOG00000024733	Mnd1	2:183073187-183128932	5.32775	8.21308	-0.525548	0.0185171	0.340397
ENSRNOG00000008022	Apaf1	7:31699885-31784192	8.39023	12.8418	-0.50855	0.0186105	0.341237
ENSRNOG00000002599	Grap	10:47930633-47949773	2.5521	4.95644	-0.847701	0.0186886	0.342231
ENSRNOG00000017810	Uros	1:205756640-205777167	31.1562	19.325	0.765429	0.0187842	0.343541
ENSRNOG00000017206	Igfbp5	9:80150211-80167033	138.314	100.291	0.548473	0.0188817	0.343979
ENSRNOG00000001912	Tecrl	14:26662965-26737657	0.0107263	0	8.61153	0.0188993	0.343979
ENSRNOG00000001062	Kmt5a	12:37559770-37574750	56.8297	42.8362	0.50007	0.0188996	0.343979
ENSRNOG00000015410	Aspnl1	17:14656009-14679409	3.87603	7.19765	-0.776587	0.0189043	0.343979
ENSRNOG00000038819	RGD1564308	16:49485256-49509767	0.080398	0.00440633	4.22516	0.0189373	0.344361
ENSRNOG00000014367	Ephb6	4:70903253-70918514	0.658308	1.84149	-1.36282	0.0190375	0.345524
ENSRNOG00000007529	Bmf	3:110302483-110324084	7.17736	12.6582	-0.722318	0.0190565	0.345596
ENSRNOG00000001628	Pcp4	11:36819606-36912229	4.41974	1.18418	1.98798	0.0190728	0.345596
ENSRNOG00000007017	Tmc2	3:122720769-122790100	0	0.003962	-6.9663	0.0191026	0.345828
ENSRNOG00000002667	Lamc2	13:70566643-70626252	1.47568	0.687156	1.17629	0.0191628	0.346479
ENSRNOG00000007415	Ptgs1	3:15560712-15582344	12.0421	19.6168	-0.595174	0.0193199	0.348439
ENSRNOG00000049768	Adcy9	10:11392625-11512600	3.79701	5.78867	-0.508785	0.0193461	0.348473
ENSRNOG00000022839	Ifit3	1:252906234-252911382	3.23295	1.16049	1.5816	0.0194274	0.349509
ENSRNOG00000054648	Tspy1	Y:150884-156447	0.370553	0	7.38479	0.019428	0.349509
ENSRNOG00000051905	Wnt2	4:45292437-45332420	0.815012	1.80661	-1.03436	0.0195029	0.350196
ENSRNOG00000016606	Snorc	9:94562839-94568312	91.6101	68.7827	0.517223	0.0196172	0.351587
ENSRNOG00000012342	Ttc29	19:33206026-33424972	0	0.004344	-8.66267	0.0196625	0.351958
ENSRNOG00000007041	Abcg2	4:88832178-88890621	11.1388	4.95072	1.18885	0.01968	0.351962
ENSRNOG00000053239	Clmp	8:44847157-44975457	17.377	13.3904	0.468717	0.0196873	0.351962
ENSRNOG00000010331	Ctsb	15:46316741-46337612	479.579	343.666	0.56386	0.0197035	0.352031
ENSRNOG00000010640	Agtr1b	2:105149020-105224295	0.0107663	0	8.64953	0.0197895	0.352888
ENSRNOG00000004356	Lrrc52	13:85672014-85695421	0	0.012402	-6.98413	0.019792	0.352888
ENSRNOG00000020246	Myl9	3:152857592-152863960	22.9578	37.9389	-0.620033	0.0198008	0.352888
ENSRNOG00000011680	Il16	1:145781928-145870912	7.98827	13.6301	-0.675473	0.019841	0.353346
ENSRNOG00000054136	Xkrx	X:104968582-104985495	0.054899	0.374395	-2.31117	0.0198839	0.353616
ENSRNOG00000013588	Glra1	10:40855559-40953651	0	0.009565	-8.64322	0.0198922	0.353616
ENSRNOG00000060806	Drd3	11:61822077-61874327	0.0147207	0	8.55158	0.0199332	0.353833
ENSRNOG00000052062	Tut4	5:128023243-128168207	5.73377	10.7381	-0.74899	0.0199403	0.353833
ENSRNOG00000002014	Stap1	14:23568956-23604834	4.20316	7.95845	-1.01212	0.0199576	0.353898
ENSRNOG00000004430	Cep131	10:109243039-109267500	3.26885	5.81278	-0.729399	0.0199687	0.353898
ENSRNOG00000031778	Mef2d	2:187512164-187538026	16.0946	24.9934	-0.532256	0.0200795	0.355431
ENSRNOG00000046305	LOC103690114	1:88206813-88216556	0.829462	0.0219377	5.35405	0.0200801	0.355431
ENSRNOG00000051952	Tes	4:44321883-44360405	9.26768	14.7358	-0.56285	0.0201852	0.35685
ENSRNOG00000009218	Prdm12	3:10181924-10196626	0	0.017277	-6.89195	0.0202028	0.356942
ENSRNOG00000005509	Pak7	3:129042742-129357491	0	0.00312633	-8.6235	0.0202852	0.35816
ENSRNOG00000011649	Epb42	3:112965653-112985318	69.8002	47.2193	0.641315	0.0203093	0.35816
ENSRNOG00000002001	Itsn1	11:31893489-32069249	30.2307	20.3279	0.559387	0.02033	0.358305
ENSRNOG00000060329	Emb	2:49678280-49741308	183.947	123.391	0.617322	0.0203908	0.359154
ENSRNOG00000025522	Atf7ip2	10:5476966-5511955	0	0.041581	-6.98709	0.0204451	0.359828
ENSRNOG00000002146	Pkd2	14:6602004-6645257	7.29223	5.37392	0.534904	0.0204542	0.359828
ENSRNOG00000008223	Cnr1	5:49311030-49333056	0.866014	0.335872	1.46407	0.020497	0.360359
ENSRNOG00000006620	Xcr1	8:132911486-132919110	0	0.034366	-6.88196	0.0205449	0.360759
ENSRNOG00000019183	Alox15	10:56953691-56962161	754.007	437.019	0.845995	0.0207364	0.363335
ENSRNOG00000025693	Tdrd6	9:19917603-19932920	0.00743833	0	5.91014	0.0207395	0.363335
ENSRNOG00000047321	Hba-a2	10:15589364-15590220	24741.8	16231.5	0.687995	0.0207459	0.363335
ENSRNOG00000001752	Nrros	11:71872830-71889887	14.8059	23.5179	-0.559887	0.0207551	0.363335
ENSRNOG00000056915	Ptprq	7:49763657-50034932	0.002719	0	8.48902	0.0208534	0.364609
ENSRNOG00000014018	St8sia1	4:177065168-177196180	0.827075	1.4428	-0.713101	0.0208779	0.364815
ENSRNOG00000026518	Tmem156	14:44889287-44918373	1.37867	3.87722	-1.39246	0.0209567	0.365746
ENSRNOG00000014231	Pnoc	15:48805228-48833285	0	0.00902767	-6.86478	0.0210253	0.366558
ENSRNOG00000027049	Atp5mf	12:11191812-11198369	117.548	78.755	0.681749	0.0210966	0.367095
ENSRNOG00000050658	Tacr2	20:31892515-31905153	0.0199693	0	6.91244	0.0213317	0.370258
ENSRNOG00000032951	Jsrp1	7:11769400-11774387	0.355594	1.8625	-2.24672	0.0213533	0.370408
ENSRNOG00000007400	Srebf2	7:123381077-123438603	20.7203	31.1891	-0.485059	0.0213995	0.370633
ENSRNOG00000028708	Ntsr1	3:175885894-176046345	0.0703327	0.00391133	3.84332	0.0214424	0.370633
ENSRNOG00000017021	Galnt18	1:176296193-176607466	3.39227	2.48107	0.545225	0.0214569	0.370633
ENSRNOG00000046487	Pou5f1	20:3747221-3751994	0.0546687	0	6.97501	0.0214959	0.37086
ENSRNOG00000013991	Creg2	9:46360061-46401911	0	0.0186977	-8.53064	0.0215266	0.371165
ENSRNOG00000012508	Slc39a8	2:241029693-241092582	19.4528	14.7856	0.486855	0.0215586	0.371492
ENSRNOG00000018413	Per3	5:168086998-168123395	14.0612	9.14441	0.799851	0.0217812	0.374877
ENSRNOG00000050293	Olr1569	11:85313090-85314028	0	0.121727	-5.73487	0.0218154	0.375241
ENSRNOG00000018905	Armc4	17:60287203-60474031	0.022126	0.001481	4.02339	0.021895	0.375539
ENSRNOG00000028198	Sh2b3	12:40244081-40265757	12.3753	19.3253	-0.539163	0.0221079	0.378153
ENSRNOG00000002052	Ccdc80	11:60645086-60679555	51.2952	40.1658	0.459669	0.0221168	0.378153
ENSRNOG00000008816	Gpnmb	4:78694447-78715683	107.925	77.4378	0.561079	0.0223091	0.380751
ENSRNOG00000020081	As3mt	1:266482858-266520552	4.66755	8.46534	-0.754933	0.022322	0.380751
ENSRNOG00000002122	Lrrc8c	14:5283647-5378726	8.6504	12.5355	-0.569087	0.0223579	0.381012
ENSRNOG00000001804	Itpr2	4:180538389-180722358	6.70084	9.99931	-0.472022	0.0225463	0.383346
ENSRNOG00000015562	Cdh17	5:25391115-25443718	2.0008	1.00678	1.02351	0.0225545	0.383346
ENSRNOG00000028097	Slc7a14	2:115678344-115788687	0	0.007662	-8.48832	0.0226925	0.385463
ENSRNOG00000017061	Patl2	3:114066840-114074803	0	0.0327317	-6.95979	0.022708	0.385496
ENSRNOG00000012961	AABR07067882.1	9:70787136-70787913	0.00807967	2.65759	-7.11058	0.0227913	0.386452
ENSRNOG00000020644	Nsg2	10:15867887-15928169	0.942061	1.76104	-0.812198	0.0228422	0.386812
ENSRNOG00000023352	Fam78a	3:11086017-11103821	6.21416	11.7549	-0.826146	0.0228473	0.386812
ENSRNOG00000018126	Abca1	5:69857771-69983015	11.0244	8.37612	0.4879	0.0228565	0.386812
ENSRNOG00000020536	Hbz	10:15609358-15610826	0.148962	0	6.76216	0.0228665	0.386812
ENSRNOG00000059801	Lima1	7:141428063-141528397	7.70158	5.89295	0.478958	0.02291	0.387049
XLOC_007985	XLOC_007985	1:282756214-282760711	0.318126	0.0383543	3.06043	0.0229108	0.387049
ENSRNOG00000021691	Ccdc92	12:37211316-37237848	1.77414	3.43139	-0.841483	0.0229211	0.387049
ENSRNOG00000012660	Postn	2:143656793-143688087	29.6145	49.7017	-0.641067	0.0230937	0.389733
ENSRNOG00000014722	Raph1	9:67293309-67341341	13.9735	10.5723	0.502307	0.0231873	0.390687
ENSRNOG00000052061	Ppef2	14:17306825-17333588	0.0114877	0.083063	-2.70651	0.0231938	0.390687
ENSRNOG00000014118	Klkb1	16:50152008-50175458	0.162143	0.00448567	5.2136	0.0232236	0.390687
ENSRNOG00000045918	Jarid2	17:20184245-20364714	13.4793	19.9002	-0.459882	0.0232449	0.390687
ENSRNOG00000013574	Appl1	16:2563520-2602103	6.53522	10.8286	-0.620367	0.0232636	0.390687
ENSRNOG00000030232	Hacd3	8:70471572-70509874	9.58919	6.9806	0.547032	0.0232695	0.390687
ENSRNOG00000038066	Fam155b	X:69580015-69605032	0.00898667	0	6.7857	0.023273	0.390687
ENSRNOG00000032183	Scmh1	5:139379644-139466081	9.47456	14.2839	-0.558343	0.0233209	0.390786
ENSRNOG00000014060	Mras	8:107629028-107681512	9.1977	6.86968	0.548206	0.0233291	0.390786
ENSRNOG00000018053	Fech	18:59941992-59975192	192.658	123.905	0.710891	0.0233598	0.390803
ENSRNOG00000017765	Net1	17:70010794-70020982	62.7857	44.7019	0.57431	0.0233619	0.390803
ENSRNOG00000010037	Epb41	5:150084611-150167077	202.164	142.736	0.571122	0.023393	0.390866
ENSRNOG00000002964	Xcl1	13:83199264-83202864	0.501526	0.0470513	3.42381	0.0234145	0.390891
ENSRNOG00000050763	AC127013.1	4:154944137-155020169	0	0.152731	-6.78111	0.023424	0.390891
ENSRNOG00000017063	Fcna	3:2849984-2853272	76.4854	51.4739	0.657434	0.0234606	0.390891
ENSRNOG00000038135	RatNP-3b	16:75497781-75530517	723.445	1475.8	-0.902461	0.0234609	0.390891
ENSRNOG00000017191	Trim5	1:169446805-169534896	9.2001	14.0953	-0.510732	0.0235159	0.391549
ENSRNOG00000001990	Ugt2b10	14:22724070-22825444	0.0129	0	8.33156	0.0235557	0.391755
ENSRNOG00000028930	Dab2	2:55747318-55768270	34.004	25.5309	0.505756	0.0236449	0.39301
ENSRNOG00000016695	Mmp2	19:15542765-15570611	27.8704	41.7786	-0.486161	0.0237027	0.393514
ENSRNOG00000010938	Slc7a10	1:91433030-91448564	0.365175	1.34642	-1.82978	0.0238308	0.395412
ENSRNOG00000039698	Prss22	10:13370098-13374808	0	0.0490127	-6.73199	0.0238686	0.39581
ENSRNOG00000052064	Parvg	7:125288081-125306976	16.3312	27.0912	-0.618792	0.0239714	0.397284
ENSRNOG00000059947	Sdc1	6:33885495-33908016	20.2216	15.1798	0.505795	0.0240047	0.397605
ENSRNOG00000011575	Adamts18	19:46005277-46101250	3.76652	2.76558	0.546125	0.024071	0.397883
ENSRNOG00000015567	Slc9a2	9:47386626-47491907	0.126614	0.308153	-1.18465	0.024091	0.397883
ENSRNOG00000013257	Hecw2	9:60457215-60672246	2.53288	1.89864	0.518912	0.0241048	0.397883
ENSRNOG00000017500	Mtss2	19:40905847-40925660	13.7649	9.99876	0.552664	0.0241084	0.397883
ENSRNOG00000000913	Gusb	12:30198822-30268985	56.1497	43.5604	0.46444	0.0241744	0.397883
ENSRNOG00000057072	Slc12a3	19:11106033-11144641	0.0611153	0.32255	-1.95031	0.0242037	0.398136
ENSRNOG00000017872	LOC688778	1:219199158-219207182	0.36638	0.0711737	2.45996	0.0242189	0.398158
ENSRNOG00000046343	Cryga	9:71835883-71852113	0	0.0162487	-6.71365	0.0243675	0.399587
ENSRNOG00000004314	Ppm1h	7:66843865-67116980	6.30981	5.13033	0.458188	0.0243864	0.399587
ENSRNOG00000037982	Tmem236	17:81274513-81344836	0.276145	1.01638	-1.72033	0.024409	0.399676
ENSRNOG00000042918	RGD1304770	20:45015855-45024315	0	0.0257517	-6.69149	0.0244548	0.400119
ENSRNOG00000024461	Marchf11	2:78825074-78926395	0	0.00685533	-8.36247	0.024464	0.400119
ENSRNOG00000006420	Rbm38	3:171037957-171050475	243.433	169.089	0.601008	0.024557	0.40141
ENSRNOG00000002889	Afp	14:19141755-19159923	0	0.011288	-6.62081	0.0245909	0.401735
ENSRNOG00000014479	Cttnbp2nl	2:207495055-207541645	9.45362	7.04094	0.519607	0.024635	0.401912
ENSRNOG00000009832	Slc39a14	15:51982982-52029816	16.7922	13.0382	0.462641	0.0246708	0.402123
ENSRNOG00000049491	RT1-DMb	20:3945601-3952846	4.19959	13.2784	-1.68403	0.0247053	0.402294
ENSRNOG00000028024	Tmem139	4:71650575-71651438	0.0274107	0.543083	-3.85554	0.0247394	0.402433
ENSRNOG00000008990	Amotl1	8:13042641-13109487	16.4586	12.8147	0.458038	0.0247554	0.402433
ENSRNOG00000002413	Gpc4	X:139354155-139464798	8.26082	6.3863	0.466378	0.0247601	0.402433
ENSRNOG00000055079	Ndufaf2	2:39321741-39434560	1.97323	1.31269	0.729658	0.0247811	0.402546
ENSRNOG00000010210	Slc7a11	2:139453774-139528402	1.00121	0.335537	1.2422	0.0248805	0.403244
ENSRNOG00000048847	Wdr17	16:39827749-39938513	0.00561733	0	8.24588	0.0249184	0.40363
ENSRNOG00000011227	Atp1b2	10:56205625-56211891	39.6122	24.6665	0.756356	0.0250054	0.403897
ENSRNOG00000006622	Cry1	7:24534615-24634097	3.50777	5.468	-0.539398	0.0250401	0.403962
ENSRNOG00000025160	Tlcd4	2:224759094-224824489	7.00212	4.4504	0.75784	0.0251215	0.404246
ENSRNOG00000010301	Eif4e3	4:132048998-132114684	3.41888	5.99386	-0.952831	0.0251252	0.404246
ENSRNOG00000002248	Fryl	14:37551940-37756149	22.3053	32.5636	-0.450142	0.0251259	0.404246
ENSRNOG00000048882	AABR07034992.1	12:2882562-2954562	0.033993	0.485185	-3.88323	0.0253126	0.406792
ENSRNOG00000012427	Veph1	2:157869392-158156444	0.451313	0.275727	0.741738	0.0254022	0.407546
ENSRNOG00000001011	Rflna	12:37038733-37047628	9.51865	5.62699	0.849468	0.0254721	0.408075
ENSRNOG00000014061	Dusp5	1:274245184-274258595	2.29518	4.72364	-0.936445	0.0254793	0.408075
ENSRNOG00000020151	Cdh1	19:38768467-38838395	13.6357	10.1139	0.523313	0.0254966	0.408075
ENSRNOG00000052354	Arhgef40	15:28377996-28403090	9.91944	6.5609	0.677157	0.0255252	0.408147
ENSRNOG00000014347	Slc4a2	4:7264683-7281223	24.5143	18.6733	0.492433	0.025697	0.410424
ENSRNOG00000005302	Slc2a9	14:77067503-77192702	2.29169	3.45886	-0.680456	0.0257238	0.410424
ENSRNOG00000039560	LOC103690116	17:15475710-15484269	12.7157	7.71069	0.812174	0.025725	0.410424
ENSRNOG00000018716	Dennd2c	2:205592182-205660611	1.81038	3.20076	-0.715647	0.0257733	0.410808
ENSRNOG00000003526	Sytl4	X:104765294-104814145	1.74795	3.04596	-0.688283	0.0257777	0.410808
ENSRNOG00000017502	Sike1	2:205471144-205496012	7.03184	11.7921	-0.596677	0.0259456	0.412564
ENSRNOG00000008282	Elf5	3:93351619-93371656	0	0.0326093	-8.27041	0.0261117	0.414528
ENSRNOG00000060603	Nhsl1	1:13595295-13705396	4.09887	3.0719	0.508769	0.0261154	0.414528
ENSRNOG00000029308	Lrmp	4:179382752-179441819	11.9882	19.8092	-0.677651	0.026134	0.414528
ENSRNOG00000042165	Colca2	8:55674288-55682685	0.335982	1.33787	-1.92674	0.0261415	0.414528
ENSRNOG00000002013	Sidt1	11:61321459-61417842	0.103534	0.276365	-1.30125	0.0262028	0.414877
ENSRNOG00000009316	Bmp10	4:119225040-119230728	0	0.045123	-6.82898	0.026207	0.414877
ENSRNOG00000056495	AABR07065676.1	6:139177200-139205203	0.937872	2.45061	-1.23389	0.0262885	0.415697
ENSRNOG00000018778	Cadm1	8:52127399-52189722	14.3436	10.7617	0.499559	0.0263169	0.415697
ENSRNOG00000017155	Nck2	9:50247692-50373284	5.88326	8.66658	-0.460134	0.0263449	0.41591
ENSRNOG00000004912	Itgav	3:71114100-71202411	32.9522	25.5816	0.460343	0.026401	0.416565
ENSRNOG00000026039	Tspan32	1:216176430-216227495	2.42308	4.39008	-0.829484	0.0265171	0.417814
ENSRNOG00000046727	Abcc2	1:263554453-263613252	0.035167	0.135077	-1.83374	0.0265526	0.417814
ENSRNOG00000005371	Klhl29	6:29178858-29483460	1.48702	0.92959	0.77018	0.0265757	0.417814
ENSRNOG00000005985	Kcnma1	15:344360-1055245	10.4617	8.42917	0.460218	0.0265895	0.417814
ENSRNOG00000009329	Nr1d1	10:86683875-86690815	13.6195	5.86348	1.27398	0.0265945	0.417814
ENSRNOG00000029386	RT1-N2	20:3146856-3150852	0.743219	4.79961	-2.1511	0.0265969	0.417814
ENSRNOG00000009342	Fcnb	3:6617751-6626284	170.002	289.316	-0.649419	0.0267042	0.418993
ENSRNOG00000012067	Fam111a	1:229003961-229019527	131.233	297.517	-1.09479	0.0267709	0.418993
ENSRNOG00000045829	Thbs1	3:109862117-109873466	90.8183	134.217	-0.45829	0.0267746	0.418993
ENSRNOG00000015911	Lrp5	1:218816841-218920094	11.5405	8.9476	0.460344	0.0267891	0.418993
ENSRNOG00000007636	Cadps2	4:50326442-50860756	0.169538	0.321703	-0.817335	0.0269365	0.421068
XLOC_090787	XLOC_090787	3:132736380-132811092	1.62836	1.02681	0.767136	0.0270167	0.421892
ENSRNOG00000026845	Fam81b	2:3025217-3124543	0	0.007139	-8.23904	0.0271061	0.423027
ENSRNOG00000032473	Scn10a	8:128298594-128416650	0.00301467	0.047728	-3.82485	0.0271749	0.423525
ENSRNOG00000002419	Plp1	X:107475620-107512113	0.492689	1.14653	-1.07681	0.0271824	0.423525
ENSRNOG00000021261	Rassf2	3:124571108-124610267	13.2389	21.3713	-0.609474	0.0272239	0.423941
ENSRNOG00000022721	Clec18a	19:43163129-43175624	0.0158347	0	6.63325	0.0273567	0.425353
ENSRNOG00000004603	Srgap1	7:63973279-64251110	4.19036	3.22487	0.46881	0.0273741	0.425353
ENSRNOG00000013694	Ntng2	3:7742471-7796385	8.92912	14.797	-0.617709	0.0274464	0.425868
ENSRNOG00000024457	Pde11a	3:62818502-63211845	0.371146	0.221058	0.845717	0.0274488	0.425868
ENSRNOG00000019838	Gmfg	1:85312528-85317968	69.7598	116.236	-0.621106	0.0274518	0.425868
ENSRNOG00000018405	Apoc4	1:80595326-80599572	0.041395	0	6.47	0.0274788	0.425922
ENSRNOG00000017659	Hs3st2	1:191344979-191474142	0	0.00475267	-8.18474	0.0274851	0.425922
ENSRNOG00000052397	AC099150.1	1:102924059-102931774	0.191103	0.843298	-2.02069	0.0275455	0.426397
ENSRNOG00000037607	LOC100911575	1:214428526-214430515	251.455	192.217	0.489826	0.0276899	0.4284
ENSRNOG00000049484	Atp9a	3:165412803-165477771	6.23685	4.66425	0.517431	0.0279341	0.430549
ENSRNOG00000022967	Slc35d1	5:122699587-122746839	14.3359	10.7776	0.50083	0.0279937	0.431236
ENSRNOG00000023238	Dgkd	9:94980409-95069714	14.5069	21.4698	-0.460329	0.0280546	0.431735
ENSRNOG00000058352	AABR07065699.4	6:139405938-139531627	1.85741	4.66291	-1.26988	0.0280563	0.431735
ENSRNOG00000012779	Msr1	16:56813791-56900052	2.81473	1.8901	0.74595	0.0281033	0.432226
ENSRNOG00000009419	Ptprg	15:12926167-13228607	7.15694	5.50406	0.46354	0.0281422	0.432591
ENSRNOG00000017976	Slco2b1	1:164623599-164671577	9.60061	7.07597	0.528479	0.0281957	0.433182
ENSRNOG00000010133	Bpgm	4:61912210-61940696	212.488	140.834	0.670679	0.0283078	0.434555
ENSRNOG00000002969	Itpkb	13:98615287-98708149	10.8546	15.9574	-0.451073	0.0285272	0.437336
ENSRNOG00000010698	Car1	2:88217188-88227479	289.235	192.309	0.662303	0.028655	0.437654
ENSRNOG00000007439	Unc13d	10:104613928-104628676	8.59156	15.0602	-0.656835	0.0288007	0.439264
ENSRNOG00000017748	Nkx6-2	1:211922389-211923929	0.056851	0	5.54997	0.0288065	0.439264
ENSRNOG00000005291	Slc38a1	7:137975549-138039984	13.6216	20.3722	-0.471502	0.0288964	0.439747
ENSRNOG00000026376	RGD1560860	17:59697875-59746966	0.112287	0	8.05691	0.028901	0.439747
ENSRNOG00000052287	Bsph1	1:75748916-75789785	0.014022	0	8.05756	0.0289041	0.439747
ENSRNOG00000001867	Snap29	11:87827651-87858107	12.2036	18.5949	-0.501641	0.0289648	0.439747
ENSRNOG00000038943	RGD1560034	7:27620458-27786999	0	0.00398833	-8.14536	0.0289979	0.439747
ENSRNOG00000016977	Calb2	19:41482728-41509658	0	0.021798	-8.12028	0.02901	0.439747
ENSRNOG00000048161	Tlr9	8:114916122-114920171	1.61701	4.6025	-1.40323	0.0290225	0.439747
ENSRNOG00000017065	Arhgap28	9:116058610-116222440	1.29034	2.24522	-0.697504	0.0290922	0.44057
ENSRNOG00000018992	Dpysl3	18:37716143-37819097	7.86269	11.4353	-0.448238	0.0292321	0.44222
ENSRNOG00000007044	L3mbtl1	3:159321310-159347631	0.114989	0.437079	-1.72216	0.0292964	0.442725
ENSRNOG00000038115	Defb37	16:75083172-75095108	0	0.0550967	-8.13147	0.0293484	0.443044
ENSRNOG00000021499	Siglech	1:114046308-114154638	0.595192	1.19267	-0.901326	0.029406	0.443679
ENSRNOG00000026762	RT1-DOa	20:3889370-3892449	0.0165467	0.220308	-3.69563	0.0294483	0.443788
ENSRNOG00000026408	Rnf169	1:164913877-164977633	4.75327	5.79443	-0.60795	0.0294533	0.443788
ENSRNOG00000026150	Zar1	14:37759776-37763712	0	0.0486763	-6.50777	0.0294981	0.443788
ENSRNOG00000013593	Upk3a	7:125920357-125925430	0	0.038899	-6.50777	0.02951	0.443788
ENSRNOG00000001807	Sspn	4:180291389-180324408	5.75859	4.12588	0.577772	0.0296763	0.445292
ENSRNOG00000007048	Rap1b	7:60853930-60860990	97.0236	143.997	-0.465903	0.029695	0.445292
ENSRNOG00000004107	Rpl23	10:85721394-85725429	396.061	312.964	0.436234	0.0299045	0.447427
ENSRNOG00000001339	Psmd9	12:38786540-38805121	14.8123	9.79421	0.68869	0.0299879	0.447898
ENSRNOG00000025220	Slc6a16	1:101249522-101261233	0.10516	0.464141	-2.02491	0.0299986	0.447898
ENSRNOG00000057376	AABR07051548.2	3:16751613-16754189	2.25576	7.01974	-2.1478	0.0300197	0.447979
ENSRNOG00000016678	Angptl2	3:12262822-12292663	31.3243	23.8703	0.48161	0.0300425	0.448086
ENSRNOG00000006076	Steap2	4:25507463-25527087	3.87227	2.39164	0.793058	0.0301006	0.448286
ENSRNOG00000016623	Tmeff2	9:55384100-55673829	0.0393563	0.125902	-1.39977	0.0301029	0.448286
ENSRNOG00000005033	Acvr1	3:44432471-44522930	8.61981	6.67903	0.460845	0.0301868	0.448578
ENSRNOG00000001404	Agfg2	12:22082057-22118220	24.8439	18.1951	0.534127	0.0302166	0.448578
ENSRNOG00000013000	Ldhb	4:176701983-176720012	7.00633	11.9893	-0.676322	0.0303385	0.449922
ENSRNOG00000021898	LOC681241	17:86239087-86322144	0	0.00681667	-8.06654	0.030395	0.45032
ENSRNOG00000032871	Mlc1	7:129949967-129970550	0.257045	0.033471	2.98132	0.0305889	0.452705
ENSRNOG00000016208	Setbp1	18:75089052-75430448	4.35889	3.20646	0.461215	0.0306131	0.452821
ENSRNOG00000004731	Ano3	3:101840630-102151489	0	0.001808	-8.05279	0.0306776	0.453317
ENSRNOG00000022937	Bpifc	7:23854846-23911953	0	0.0103717	-8.04574	0.0307031	0.453349
ENSRNOG00000003893	Ccnjl	10:29123273-29182857	1.29358	2.8157	-1.01075	0.0307208	0.453349
ENSRNOG00000001844	Klhl42	4:181481147-181502916	15.0494	10.9116	0.553144	0.0307522	0.453349
ENSRNOG00000001575	Grik1	11:27811957-27971359	0	0.00406333	-8.07451	0.0307597	0.453349
ENSRNOG00000012062	Npc2	6:108467410-108488330	85.3944	67.812	0.431042	0.0308459	0.454152
ENSRNOG00000025742	Lmnb2	7:11660934-11675472	8.03579	12.9825	-0.594364	0.0308999	0.454618
ENSRNOG00000007012	Ly75	3:46365165-46457201	1.7737	2.83245	-0.567159	0.0309093	0.454618
ENSRNOG00000014592	Zbtb46	3:176890806-176958880	2.92023	2.05714	0.620464	0.0309294	0.454679
ENSRNOG00000025219	RGD1559622	2:149715198-149754776	0.009665	0.139815	-3.78229	0.0310139	0.455687
ENSRNOG00000001245	Pcbp3	20:12429315-12629981	1.17408	1.77552	-0.502817	0.0310446	0.455819
ENSRNOG00000006761	Sh3gl2	5:103479767-103654247	0.252548	0.119983	1.18246	0.0310677	0.455819
ENSRNOG00000004470	Il24	13:47618452-47623849	0	0.0356357	-6.46686	0.031082	0.455819
ENSRNOG00000010997	Ednrb	15:88006977-88036354	4.07577	2.71432	0.684363	0.0310929	0.455819
ENSRNOG00000042166	AABR07014259.1	14:6221085-6223394	0.0810793	0	6.51224	0.0311184	0.455819
ENSRNOG00000046022	Wdr77	2:208420206-208586356	3.64161	6.19373	-0.73197	0.0312392	0.456443
ENSRNOG00000031997	Ttll7	2:252732251-252850495	1.45919	2.99352	-0.757874	0.0312503	0.456443
ENSRNOG00000027468	Slc6a15	7:45328105-45382229	1.18549	0.703054	0.883995	0.0312566	0.456443
ENSRNOG00000010181	Clec4d	4:156253079-156264769	9.60116	5.99325	0.7993	0.0312901	0.456698
ENSRNOG00000008947	Cpz	14:80403001-80426245	15.7336	24.6416	-0.562568	0.031357	0.457441
ENSRNOG00000029810	LOC100911766	1:214454090-214473741	8.75637	5.85815	0.683576	0.0313855	0.457624
ENSRNOG00000009629	Car2	2:88097720-88113029	806.292	537.075	0.66087	0.0314338	0.458095
ENSRNOG00000012810	Rfesd	2:2769400-2779109	17.3628	11.4727	0.677114	0.0317928	0.461915
ENSRNOG00000048651	Nrtn	9:10300228-10306597	12.8326	5.99142	1.16775	0.0318248	0.462146
ENSRNOG00000001173	Cabp1	12:47179664-47210018	0.110191	1.54087	-2.10841	0.031866	0.46251
ENSRNOG00000030910	Grik4	8:46806147-47094352	0.222125	0.118587	0.99801	0.0318973	0.462729
ENSRNOG00000038366	Larp1b	2:127845034-127876793	12.0595	8.75903	0.545056	0.0322313	0.465217
ENSRNOG00000003537	Spta1	13:92264231-92340083	129.518	92.5243	0.565137	0.0322943	0.465455
ENSRNOG00000052952	AABR07031963.1	18:40853988-40873685	0.0333107	0.002896	3.51897	0.032426	0.4664
ENSRNOG00000012347	Gata2	4:120133713-120142488	8.52547	5.09731	0.831222	0.0324498	0.4664
ENSRNOG00000009332	Rec114	8:63445644-63533546	1.74966	1.08078	0.78891	0.0324503	0.4664
ENSRNOG00000049943	Sinhcaf	4:183401318-183475374	3.78596	6.29285	-0.689724	0.0324545	0.4664
ENSRNOG00000015306	Slc9a4	9:47281961-47328839	0.0110903	0	8.0081	0.0325112	0.466902
ENSRNOG00000007049	Bcl11a	14:108826831-108921669	10.8997	16.7191	-0.554122	0.0326429	0.467921
ENSRNOG00000027833	Fnip2	2:178225915-178334900	20.4028	15.4536	0.486515	0.0326475	0.467921
ENSRNOG00000008065	Wwc1	10:20663541-20818128	0.329613	0.188524	0.90443	0.0327396	0.468479
ENSRNOG00000006997	App	11:24425005-24641858	96.9107	75.4029	0.446935	0.032752	0.468479
ENSRNOG00000026169	RGD1560146	5:115320134-115387413	0.007541	0	7.85686	0.0327783	0.468621
ENSRNOG00000020322	Asb1	9:98668231-98684900	27.3373	18.7829	0.624047	0.032924	0.470235
ENSRNOG00000032137	Foxb2	1:237065753-237067553	0	0.0459133	-5.41047	0.0329975	0.470931
ENSRNOG00000005105	Sun3	14:89215703-89238094	0	0.0263643	-7.98464	0.0330273	0.471005
ENSRNOG00000013670	Pax3	9:84005183-84101172	0.005344	0	7.99185	0.0331316	0.472248
ENSRNOG00000014365	Gne	5:59512872-59553416	17.8798	13.7766	0.511629	0.0331804	0.472248
ENSRNOG00000049446	LOC100366030	14:6101457-6148925	0.510129	0.083479	2.71293	0.0332209	0.472416
ENSRNOG00000031348	Tmem232	9:113008792-113246545	0	0.00234367	-7.95862	0.0332349	0.472416
ENSRNOG00000047786	Ogn	17:15447716-15467359	11.4065	6.69829	0.890051	0.0332744	0.472645
ENSRNOG00000029886	Hba-a1	10:15573277-15606329	41602.6	23123.8	0.656345	0.0332995	0.472767
ENSRNOG00000042581	Ptcra	9:16529579-16539472	0	0.146274	-6.52939	0.0333518	0.473275
ENSRNOG00000003496	Tbc1d9	19:24329023-24429909	2.68677	1.984	0.511263	0.0334236	0.473824
ENSRNOG00000008922	Trim14	5:62128941-62153786	1.16866	3.12933	-1.30614	0.0334437	0.473874
ENSRNOG00000004109	Zfpm2	7:79637633-79964405	1.47762	1.07584	0.507423	0.033488	0.474266
ENSRNOG00000016810	Stmn1	5:152680407-152686806	97.9448	147.626	-0.503996	0.0335381	0.474429
ENSRNOG00000014254	Cpt1a	1:218569510-218629678	11.0649	8.03221	0.545247	0.0335573	0.474429
ENSRNOG00000018478	Myo3a	17:88963981-89167018	0.00239833	0	7.80647	0.033638	0.4745
ENSRNOG00000010117	Eif3a	1:282139823-282170017	72.4031	55.4963	0.472528	0.0336514	0.4745
ENSRNOG00000050059	AABR07035776.1	12:21931413-21952567	2.30301	1.13971	1.09521	0.033671	0.4745
ENSRNOG00000022483	Trim50	12:24348321-24365324	0	0.010639	-6.38408	0.0337034	0.4745
ENSRNOG00000061582	Scamp1	2:23855916-23941084	7.12535	4.56048	0.896079	0.033769	0.475189
ENSRNOG00000001270	Hvcn1	12:39822637-39850567	8.33722	13.672	-0.602193	0.033899	0.476235
ENSRNOG00000046912	Nr1d2	15:8730871-8757165	9.15247	5.45407	0.821828	0.0339198	0.476235
ENSRNOG00000048169	Tuba8	4:153774486-153791328	2.19757	4.37592	-0.88386	0.0339265	0.476235
ENSRNOG00000002792	Cxcl2	14:18731378-18733391	0.077888	0	6.23616	0.0340065	0.477124
ENSRNOG00000020514	Sox6	1:185673177-186182829	24.9915	17.5321	0.583972	0.0341389	0.478279
ENSRNOG00000050868	Ddx43	8:85750082-85777510	0.0181467	0	7.94199	0.034267	0.47944
ENSRNOG00000018859	Pik3ip1	14:83559882-83641964	0.953268	1.36044	-1.18283	0.0342998	0.47944
ENSRNOG00000018487	Slc3a2	1:224906554-224921092	62.5295	46.8218	0.500763	0.0343055	0.47944
ENSRNOG00000038607	Tmem86b	1:72784966-72805538	26.0093	16.5751	0.670898	0.0343832	0.480291
ENSRNOG00000058006	Sncg	16:10722106-10726707	15.924	7.12403	1.22601	0.0344187	0.480317
ENSRNOG00000046829	Kdr	14:34727623-34787183	15.5315	11.5394	0.534967	0.0344595	0.480653
ENSRNOG00000042848	Jam2	11:24266345-24285275	17.8463	13.6833	0.485153	0.0344988	0.480938
ENSRNOG00000031536	Syndig1	3:145032200-145199356	0.0454467	0.367806	-2.71594	0.0345304	0.480938
ENSRNOG00000037315	RGD1563667	9:117465628-117467198	0.051004	0	5.38315	0.0346125	0.481848
ENSRNOG00000014182	Tns1	9:81179872-81437699	24.3306	18.3601	0.495354	0.0346371	0.481956
ENSRNOG00000015380	Jup	10:88279632-88307412	9.36349	14.2073	-0.475275	0.034658	0.482013
ENSRNOG00000056012	Syt16	6:97110158-97198899	0	0.00559767	-7.8451	0.0346862	0.48217
ENSRNOG00000053037	AABR07024139.1	KL568432.1:4535-39528	9.72561	1.53822	2.71105	0.034834	0.483989
ENSRNOG00000033929	Stfa2l1	11:67395889-67400201	0.0288047	0.548046	-4.01492	0.0348564	0.484065
ENSRNOG00000000655	Ptprc	13:55061562-55173692	27.1591	41.3113	-0.534343	0.0349386	0.484688
ENSRNOG00000056944	Arhgap24	14:8383214-8600512	3.59502	5.6998	-0.478448	0.0349623	0.484688
ENSRNOG00000019357	Tax1bp3	10:59743544-59748062	15.5882	8.6465	0.965828	0.0350474	0.485305
ENSRNOG00000008869	Ppp1r9a	4:29978739-30247364	0.600854	0.418999	0.806633	0.0350739	0.485438
ENSRNOG00000001374	Rasal1	12:41416218-41448668	1.07514	2.19567	-0.921386	0.0351856	0.486748
ENSRNOG00000016280	Btrc	1:265157379-265269837	18.4233	13.1285	0.574909	0.035229	0.487082
ENSRNOG00000019120	Hmgcs2	2:200452624-200479423	0.385982	0.122648	1.74269	0.0353746	0.488247
ENSRNOG00000014743	Hagh	10:14216155-14230515	69.1948	48.5787	0.59092	0.0353792	0.488247
ENSRNOG00000018715	Clec10a	10:56764927-56769457	9.16332	4.40378	1.17187	0.0354453	0.488882
ENSRNOG00000046639	Itgae	10:59539405-59711874	1.80652	1.06332	0.818848	0.0354887	0.488882
ENSRNOG00000058647	AABR07056470.1	7:26440459-26457612	0.0268057	0	7.83676	0.0355158	0.488882
ENSRNOG00000030979	AABR07060190.1	4:61502296-61502778	0	0.176119	-5.40528	0.0355277	0.488882
ENSRNOG00000054336	Majin	1:221558093-221594118	0	0.0130353	-7.79642	0.0356674	0.490568
ENSRNOG00000058956	Pgpep1l	1:129214928-129218947	0.032982	0.360515	-3.22896	0.0358146	0.49212
ENSRNOG00000038406	Tmem132b	12:35970821-36398246	0.0842963	0.0134633	2.67085	0.0358875	0.492844
ENSRNOG00000015461	Serpine2	9:85560863-85626094	166.398	132.954	0.418552	0.0359018	0.492844
ENSRNOG00000004677	Zeb2	3:29862473-30001112	36.1517	52.9068	-0.499111	0.0360137	0.494144
ENSRNOG00000048139	Ncmap	5:153725408-153741693	3.46729	2.25804	0.983323	0.0360366	0.494221
ENSRNOG00000000967	Aacs	12:36512393-36555694	5.02999	7.72203	-0.514634	0.0360737	0.494494
ENSRNOG00000050000	AABR07034739.1	11:86092468-86092779	40.3843	110.514	-1.339	0.0362424	0.496214
ENSRNOG00000015654	Ghr	2:53150370-53413638	28.1827	18.5307	0.665203	0.0362512	0.496214
ENSRNOG00000030118	Msn	X:65226748-65295810	82.2308	119.689	-0.4529	0.0362783	0.496347
ENSRNOG00000051196	AABR07018038.1	15:36809361-36911165	31.6864	47.2798	-0.448696	0.0362974	0.496371
ENSRNOG00000002305	Slc15a2	11:66932614-66961713	1.79607	1.03771	0.887828	0.0363728	0.496911
ENSRNOG00000053494	Mcpt1l1	15:34609776-34612432	1.63378	4.81373	-1.46059	0.0364142	0.496911
ENSRNOG00000006263	Sh2d1a	X:128897181-128925407	0.124383	0.0308697	2.10456	0.0364236	0.496911
ENSRNOG00000048597	Pak2	11:72829238-72865902	16.2314	24.3487	-0.481857	0.0364237	0.496911
ENSRNOG00000056783	Cd69	4:163041141-163049084	0.0892377	0.450061	-2.17947	0.0364626	0.496988
ENSRNOG00000004131	Pkn1	19:24803524-24831500	16.3273	24.5945	-0.481211	0.0364641	0.496988
ENSRNOG00000024172	T2	1:52907435-52962388	0.00812267	0	7.79991	0.0365568	0.497541
ENSRNOG00000014666	Tfeb	9:15207822-15214596	4.45928	8.89654	-0.885493	0.0366115	0.497912
ENSRNOG00000015902	Cpxm2	1:204048785-204087001	1.02715	2.03782	-0.871776	0.0366232	0.497912
ENSRNOG00000003374	Ccdc85a	14:112719482-112946875	0.299214	0.544792	-0.781755	0.0366362	0.497912
ENSRNOG00000029682	Clic1	20:5040337-5049166	63.7227	95.6933	-0.481371	0.0366907	0.498227
ENSRNOG00000025946	Igf2bp2	11:82427594-82621079	1.95277	0.977524	1.06433	0.0367808	0.498227
ENSRNOG00000001091	Hip1r	12:38024519-38053085	11.8823	17.7953	-0.479799	0.0367849	0.498227
ENSRNOG00000012002	Iqgap1	1:142525046-142615673	56.8332	85.0268	-0.471387	0.0368204	0.498227
ENSRNOG00000061169	AABR07060952.1	4:101531370-101910348	0.114592	0.726663	-2.62024	0.0368728	0.498227
ENSRNOG00000031061	LOC306079	15:62520953-62532175	0.700589	0.195144	1.97331	0.0368822	0.498227
ENSRNOG00000051619	Asb2	6:127212273-127248372	0.267624	1.19854	-2.02368	0.0369026	0.498227
ENSRNOG00000048421	Crabp2	2:184882969-184883505	0	0.318336	-6.29555	0.0369095	0.498227
ENSRNOG00000010996	Mob1b	14:20960052-20992753	7.80829	11.6929	-0.482218	0.0369242	0.498227
ENSRNOG00000014548	Nedd9	17:22984790-23179701	13.0049	22.0554	-0.5935	0.0369379	0.498227
ENSRNOG00000042821	Cd59	3:94010475-94028621	68.2631	50.7328	0.514828	0.0370132	0.499007
ENSRNOG00000016220	Rpl12	3:12009550-12013719	401.103	277.441	0.475901	0.0370676	0.499505
ENSRNOG00000002347	Rgl1	13:69909096-70174581	9.60634	7.08891	0.524887	0.0371489	0.500352
ENSRNOG00000030387	Kng1	11:81421676-81444621	3.26966	1.47521	1.20346	0.0372411	0.500665
ENSRNOG00000028993	LOC102555453	X:1345684-1346181	43.3875	102.401	-1.14895	0.037322	0.501517
ENSRNOG00000012513	Pdk3	X:62836131-62903554	30.5952	24.3139	0.423317	0.0373753	0.501997
ENSRNOG00000058824	AABR07065789.3	6:141320809-141321353	1.73789	9.61921	-2.23336	0.0374677	0.502179
ENSRNOG00000007900	Tspan33	4:56981283-57004792	40.8122	26.2266	0.715486	0.0374684	0.502179
ENSRNOG00000033017	LOC100910669	12:21678571-21690678	1.85541	0.385109	2.42986	0.0374938	0.502179
ENSRNOG00000020369	Igf2	1:215828102-215846911	133.969	105.167	0.45198	0.0375114	0.502179
ENSRNOG00000028746	Gsto1	1:267607418-267617387	23.7619	16.9532	0.561492	0.0375236	0.502179
ENSRNOG00000029131	AABR07024637.1	16:9772688-9847444	0	0.00681967	-7.76825	0.0375448	0.502179
ENSRNOG00000018804	Ripor2	17:42324594-42422053	7.78551	11.6216	-0.474005	0.0376051	0.502725
ENSRNOG00000023389	Ephx4	14:3360712-3389943	0.0137797	0	7.62518	0.0376246	0.502751
ENSRNOG00000030238	Fndc5	5:147323240-147330266	0.574848	1.77347	-1.51193	0.0376825	0.502821
ENSRNOG00000023951	Tbc1d30	7:63361696-63407241	0.335936	0.757756	-1.07155	0.0376826	0.502821
ENSRNOG00000030102	Mboat4	16:61782797-61791091	0	0.01854	-6.17465	0.0377303	0.502864
ENSRNOG00000003030	Awat2	X:70224654-70270693	0	0.012386	-7.72885	0.0377374	0.502864
ENSRNOG00000033195	A1cf	1:250426158-250514866	0	0.00534767	-7.73223	0.0377486	0.502864
ENSRNOG00000003443	Klf1	19:26016382-26019553	162.552	108.126	0.662599	0.0377733	0.502864
ENSRNOG00000000097	Cd160	2:198935133-198942732	0	0.0842863	-7.73223	0.0377737	0.502864
ENSRNOG00000016448	Eef2k	1:190780236-190842324	15.4447	12.0125	0.45328	0.0377973	0.502945
ENSRNOG00000019181	Synpo	18:55855196-55916895	12.2126	8.20573	0.541544	0.0379539	0.504559
ENSRNOG00000055915	Ago1	5:144448792-144479306	6.89124	10.3441	-0.483696	0.0382775	0.507599
ENSRNOG00000002607	Sox9	10:101288489-101293379	32.5988	23.2276	0.591092	0.0382836	0.507599
ENSRNOG00000042996	AABR07065798.1	6:141715354-141715846	0.71276	4.64004	-2.56603	0.038289	0.507599
ENSRNOG00000017882	Camk1d	17:76532611-76938956	2.85835	4.0987	-0.421849	0.0385394	0.510446
ENSRNOG00000003880	Tph2	7:58042281-58149061	0	0.00434833	-7.69678	0.0385624	0.510514
ENSRNOG00000042808	RGD1559644	5:162727631-162751128	0.018049	0	7.72326	0.0385902	0.510647
ENSRNOG00000001005	Fcer2	12:2233778-2245324	0.153553	0.58961	-1.8398	0.0387017	0.511885
ENSRNOG00000057710	Ccnd2	4:159674885-159697207	43.3371	33.2608	0.466691	0.0387351	0.51209
ENSRNOG00000043384	AABR07069803.1	8:40366593-40576179	0	0.0634527	-7.67872	0.0387868	0.512301
ENSRNOG00000015894	Dock8	1:242959488-243153465	46.7724	70.2867	-0.494427	0.0389609	0.514363
ENSRNOG00000007887	Elk4	13:48790509-48813260	10.9196	17.6174	-0.868519	0.0390437	0.515219
ENSRNOG00000021106	Gramd1a	1:89563976-89590490	7.79078	11.9151	-0.507776	0.0391257	0.515824
ENSRNOG00000024711	Sdk2	10:102303028-102576878	9.0184	7.26524	0.413591	0.0392091	0.516686
ENSRNOG00000004298	Dpys	7:78769807-78847974	0.00492	0	7.5658	0.0392668	0.51703
ENSRNOG00000016050	Fgfr1	16:71266248-71319449	61.7829	49.7205	0.41312	0.0392832	0.51703
ENSRNOG00000004392	Aatk	10:109188112-109224370	0.495599	1.12016	-1.05456	0.0394477	0.518637
ENSRNOG00000004588	Zbed4	7:129749305-129801123	8.94917	14.044	-0.612134	0.0394941	0.518813
ENSRNOG00000006583	Hpgds	4:95946025-95970666	8.28779	5.83101	0.600704	0.0395601	0.518923
ENSRNOG00000012358	Pcyt1b	X:62727755-62818522	1.28964	0.308423	2.16373	0.0395917	0.519099
ENSRNOG00000000824	Dse	20:27703732-27782841	7.63578	5.90636	0.453035	0.0396868	0.519944
ENSRNOG00000011989	Vat1l	19:46525919-46693838	0.432795	0.211808	1.08349	0.0397058	0.519944
ENSRNOG00000013628	Cela2a	5:160374031-160383782	0.0163183	0	6.26074	0.0397106	0.519944
ENSRNOG00000012480	Pxylp1	8:104724743-104790639	16.9088	26.0862	-0.517079	0.0400602	0.522937
ENSRNOG00000016245	Neto2	19:22450030-22486531	2.59016	1.67074	0.729736	0.040075	0.522937
ENSRNOG00000014256	Foxa3	1:79920752-79930263	3.28475	1.66808	1.06636	0.0401823	0.523198
ENSRNOG00000000540	Btbd9	20:8901931-9249820	3.66802	5.31123	-0.430487	0.0402033	0.523198
ENSRNOG00000028616	Pck1	3:171213936-171219871	3.50368	9.77103	-1.40195	0.0402726	0.523198
ENSRNOG00000051510	Ccdc113	19:9912183-9931930	0.0201713	0	7.52417	0.0402864	0.523198
ENSRNOG00000012795	Cables1	18:3317724-3421721	2.62074	1.99117	0.490072	0.0402875	0.523198
ENSRNOG00000017822	Oga	1:265507451-265542276	20.5902	29.5944	-0.425888	0.0403011	0.523198
ENSRNOG00000019752	Slc29a1	9:17784468-17799005	22.9383	17.5251	0.482656	0.040304	0.523198
ENSRNOG00000050790	Dcaf12	5:57666102-57684340	105.259	74.598	0.543238	0.0403406	0.523198
ENSRNOG00000009824	Irf2	16:48576999-48732932	9.77312	16.9012	-0.595603	0.040343	0.523198
ENSRNOG00000017003	Plxna1	4:121217629-121257885	10.882	8.41965	0.461046	0.0404028	0.523736
ENSRNOG00000008465	Tmem176b	4:78450724-78458179	31.6612	21.9936	0.554119	0.0404946	0.524389
ENSRNOG00000008902	Pon1	4:30249742-30276372	0.773812	0.352218	1.23165	0.0405081	0.524389
ENSRNOG00000057794	Adamts5	11:25410975-25456836	6.98395	5.12779	0.53445	0.04061	0.52547
ENSRNOG00000048159	AABR07065778.3	6:141060650-141089166	0.521086	2.26163	-1.56936	0.0406615	0.52567
ENSRNOG00000019490	Slc20a2	16:74317899-74420556	5.13287	8.13632	-0.543467	0.0406712	0.52567
ENSRNOG00000030904	Cpb1	2:105059426-105089659	0.0130297	0	7.50323	0.0407271	0.52567
ENSRNOG00000047903	Slco6d1	9:105305345-105376935	0.00558533	0	7.6423	0.0407534	0.52567
ENSRNOG00000010665	Ccr7	10:87057136-87067456	0.130493	0.566189	-2.00716	0.040754	0.52567
ENSRNOG00000004009	Xpnpep2	X:134940615-134969996	0.579027	1.33934	-1.09027	0.0409961	0.528316
ENSRNOG00000056550	Epb41l4b	5:74030882-74191167	2.88716	1.84284	0.721965	0.0410418	0.528413
ENSRNOG00000025420	Cmtm2a	19:880024-887144	0	0.0198237	-6.07896	0.041059	0.528413
ENSRNOG00000007690	Cmpk2	6:45683234-45694822	19.4356	12.8118	0.680717	0.0412371	0.530229
ENSRNOG00000005434	Sptbn1	14:114518816-114692764	45.2445	65.9827	-0.437927	0.0413893	0.530788
ENSRNOG00000013673	Msh3	2:21790044-21931720	3.14461	4.70315	-0.48857	0.0414188	0.530788
ENSRNOG00000008055	Ccne2	5:24434872-24446406	17.6918	13.0012	0.538653	0.0414286	0.530788
ENSRNOG00000009949	Pcdh18	2:138819960-138833933	6.57735	4.34362	0.695897	0.0414599	0.530788
ENSRNOG00000022060	Magi1	4:125687307-125958112	2.36907	1.64682	0.601572	0.0415191	0.53123
ENSRNOG00000017821	Agxt2	2:60337667-60379420	0	0.00958933	-7.56413	0.041584	0.53142
ENSRNOG00000035079	AABR07049695.1	5:133620706-133644796	0	0.106711	-7.56536	0.041591	0.53142
ENSRNOG00000021217	Itga10	2:198772937-198792253	10.1105	7.37144	0.548649	0.0416026	0.53142
ENSRNOG00000051993	Gdf10	16:10250404-10263150	6.22776	3.72743	0.830661	0.0416564	0.531798
ENSRNOG00000006899	Akap14	X:123773430-123788898	0	0.0291837	-7.59684	0.0417378	0.532599
ENSRNOG00000016163	Slc1a3	2:57860834-57935363	6.43415	4.982	0.482984	0.0418093	0.532681
ENSRNOG00000009390	Edn2	5:139100898-139105792	0.028218	0	6.16208	0.0418187	0.532681
ENSRNOG00000031033	Mt-nd2	MT:3904-4942	702.899	434.533	0.79468	0.0418581	0.532945
ENSRNOG00000012912	Fgf17	15:52326778-52332097	0	0.0258737	-6.07742	0.0419173	0.533225
ENSRNOG00000047605	Ptprk	1:17446417-18058055	6.71961	5.31474	0.428373	0.0419507	0.533413
ENSRNOG00000018322	Picalm	1:154377247-154458425	102.996	82.2074	0.436021	0.0420859	0.534371
ENSRNOG00000013717	Bmp6	17:26955142-27112820	6.86984	5.40616	0.443559	0.0420994	0.534371
ENSRNOG00000014660	Usp53	2:227098795-227160379	11.0417	8.41916	0.496355	0.0421007	0.534371
ENSRNOG00000027954	Cdh15	19:55669626-55689992	10.3978	7.4866	0.559511	0.0421461	0.534473
ENSRNOG00000002079	Mapk10	14:8080275-8368254	0.0399743	0.210429	-2.15518	0.0421829	0.534703
ENSRNOG00000005650	Pgf	6:108994018-109004598	5.14596	3.0373	0.86077	0.0422079	0.534783
XLOC_018091	XLOC_018091	10:49096708-49100940	0.141955	1.09729	-2.80779	0.0423283	0.535879
ENSRNOG00000006491	Foxi3	4:98775908-98780082	0.0340787	0	6.15671	0.0423778	0.536038
ENSRNOG00000037198	Usp18	4:153805993-153834430	1.17091	0.622766	1.01334	0.0423819	0.536038
ENSRNOG00000049758	Tbc1d16	10:108258240-108321644	5.61343	4.34187	0.47136	0.0424825	0.536156
ENSRNOG00000008966	Slco5a1	5:5866897-5989667	0.441719	0.827671	-0.788511	0.0424919	0.536156
ENSRNOG00000006331	Elovl5	8:85259982-85285983	36.0829	52.2394	-0.429582	0.0424939	0.536156
ENSRNOG00000037436	Macc1	6:147315328-147394269	0.00487967	0	7.57846	0.0425036	0.536156
ENSRNOG00000012178	Lmbrd1	9:30939555-31038379	7.68698	11.1068	-0.425445	0.0425257	0.536198
ENSRNOG00000014034	Olfml2a	3:23223479-23259321	22.4526	17.9562	0.421307	0.0425516	0.536289
ENSRNOG00000027730	Nxpe1	8:52741054-52764328	4.22371	8.91247	-0.924579	0.0425863	0.53649
ENSRNOG00000013894	Gpr87	2:149398949-149417212	0.00881133	0	6.34612	0.0426599	0.536892
ENSRNOG00000032517	Cntn6	4:136512201-136904355	0	0.003415	-7.5255	0.0426649	0.536892
ENSRNOG00000021097	Hpn	1:89534106-89546086	6.83094	3.16468	1.20788	0.0426895	0.536892
ENSRNOG00000028636	Xkr5	16:75744786-75762693	2.1288	3.98204	-0.799329	0.0426933	0.536892
ENSRNOG00000028538	Vom2r48	4:156324922-156366577	0.00847967	0	7.43917	0.0427331	0.537042
ENSRNOG00000017332	Dapk2	8:71822129-71941910	49.3048	35.4537	0.572688	0.0427427	0.537042
ENSRNOG00000056854	AABR07058498.2	7:119598126-119605729	0	0.0575327	-7.55582	0.0429747	0.53972
ENSRNOG00000011696	Lifr	2:56426367-56489415	20.6587	16.4614	0.42321	0.0430066	0.539884
ENSRNOG00000001407	Tfr2	12:22177382-22194299	12.2058	7.96588	0.691673	0.0430823	0.540473
ENSRNOG00000032417	Gabrp	10:18443601-18506337	0	0.0248507	-5.56933	0.0431583	0.540839
ENSRNOG00000000536	Mdga1	20:8515142-8574082	0.535525	1.10561	-0.933423	0.0431948	0.541059
ENSRNOG00000022598	Trerf1	9:15655735-15700312	1.47389	2.65652	-0.746577	0.0433438	0.542214
ENSRNOG00000042229	Gimap1	4:78371121-78375223	0.681893	2.23714	-1.59919	0.0434247	0.542652
ENSRNOG00000016816	Phf2	17:16204427-16274624	17.6033	24.9986	-0.404757	0.0434547	0.542652
ENSRNOG00000011165	Dydc1	16:18648866-18667968	0	0.022676	-7.53486	0.0434856	0.542728
ENSRNOG00000028247	Ankrd13d	1:219520075-219532609	0.643132	1.63688	-1.2475	0.0434987	0.542728
ENSRNOG00000025587	Plagl1	1:7252349-7259035	24.6881	17.8197	0.565694	0.0436142	0.543476
ENSRNOG00000047312	Noxred1	6:111243228-111267734	0.0152437	0	7.53428	0.0436156	0.543476
ENSRNOG00000049826	UST4r	1:224319077-224389499	0	0.00577333	-7.48442	0.04368	0.543938
ENSRNOG00000021318	Epas1	6:10306405-10387265	39.0515	31.6078	0.40491	0.0440051	0.547308
ENSRNOG00000019977	Ptprf	5:137036935-137112927	12.9841	10.2902	0.425435	0.0440187	0.547308
ENSRNOG00000049797	NEWGENE_1311658	9:101307764-101319845	0	0.03517	-7.51359	0.0440804	0.547829
ENSRNOG00000028585	Tceal8	X:106713320-106715391	43.8949	28.6877	0.702994	0.0441567	0.547829
ENSRNOG00000007457	Serping1	3:72161189-72171078	29.344	22.5862	0.47346	0.0441754	0.547829
ENSRNOG00000000990	Pdap1	12:11240761-11251004	47.5483	34.7425	0.547001	0.0441975	0.547865
ENSRNOG00000020060	Atf5	1:100805829-100810522	38.3458	22.5815	0.869227	0.0442487	0.548082
ENSRNOG00000002244	Pdgfra	14:35527927-35581031	13.786	10.84	0.441519	0.0442533	0.548082
ENSRNOG00000022983	Trim17	10:45297937-45314837	41.4117	28.813	0.599702	0.0443082	0.548525
ENSRNOG00000004398	Pkhd1l1	7:83373022-83545540	9.31204	6.09743	0.692559	0.0444304	0.549799
ENSRNOG00000056017	Bcl7a	12:38662303-38691075	9.97145	15.0699	-0.486303	0.0445452	0.550982
ENSRNOG00000048472	Comp	16:20798437-20807070	186.459	284.132	-0.498748	0.0445757	0.551122
ENSRNOG00000042620	Marveld1	1:261389804-261393736	32.6498	22.9733	0.601986	0.0447017	0.552441
ENSRNOG00000022419	Dok7	14:80926654-80958478	0.0416763	0.19834	-2.1279	0.0448152	0.553366
ENSRNOG00000009385	Pik3cg	6:51465908-51498337	10.1344	15.7361	-0.520996	0.0448535	0.553505
ENSRNOG00000007799	Fam151a	5:126334803-126347770	2.45675	1.23454	1.10016	0.0448652	0.553505
ENSRNOG00000000299	Foxo3	20:46428124-46519144	91.1554	68.6304	0.49825	0.0449072	0.553595
ENSRNOG00000049053	Glipr1l2	7:54795260-54823956	0.0117287	0	7.37142	0.0450879	0.55512
ENSRNOG00000033894	AABR07024769.1	16:15764632-15798974	0.00982033	0	7.37142	0.0450931	0.55512
ENSRNOG00000018627	Plekhb1	1:165665909-165680206	3.3949	1.64196	1.16129	0.0451741	0.55574
XLOC_067703	XLOC_067703	19:46815441-47365983	1.07351	1.55279	-1.2875	0.0452082	0.55574
ENSRNOG00000001006	Nptx2	12:12013911-12025549	0	0.0138173	-6.01582	0.0452211	0.55574
ENSRNOG00000022210	Alox12b	10:55744588-55756566	0	0.012946	-6.14199	0.0453023	0.556499
ENSRNOG00000016724	Epb41l3	9:117538009-117666410	0.849271	1.8701	-0.644134	0.0455496	0.558887
ENSRNOG00000015222	Tent5c	2:202798198-202816562	276.888	190.077	0.617745	0.0455553	0.558887
ENSRNOG00000010359	Bik	7:124391432-124410447	0.598408	1.47555	-1.19838	0.0457384	0.560653
ENSRNOG00000012723	Trim55	2:104416972-104459107	0.297037	0.70782	-1.15886	0.0459159	0.562077
ENSRNOG00000021002	AABR07067812.1	9:65784546-65790347	0.000415667	0.0444067	-5.0035	0.0459599	0.562077
ENSRNOG00000054688	AABR07065768.2	6:140416650-140418831	0	0.0628107	-5.94307	0.0459719	0.562077
ENSRNOG00000005180	Vstm2a	14:99529284-99554479	0.0153963	0	7.34747	0.0459762	0.562077
ENSRNOG00000010682	Clcn3	16:32449116-32519148	15.7108	12.4844	0.423745	0.045992	0.562077
ENSRNOG00000050102	AABR07065699.1	6:139293060-139560489	0.850076	3.51013	-1.99378	0.0462144	0.564071
ENSRNOG00000021792	Prdm14	5:5710392-5730560	0.017289	0	7.44162	0.0463948	0.566032
ENSRNOG00000014840	Gna14	1:235166718-235347937	0.259894	0.122183	1.21836	0.0466367	0.567763
ENSRNOG00000007922	Cldn19	5:138300107-138305683	0	0.0632243	-7.40005	0.0466572	0.567763
ENSRNOG00000013768	Defb1	16:75294376-75309176	0	0.023805	-7.40005	0.0466598	0.567763
ENSRNOG00000008713	Slc41a2	7:26522314-26607861	3.78319	2.83996	0.508815	0.0466755	0.567763
ENSRNOG00000050706	Col25a1	2:235596123-235716401	3.17491	2.17811	0.607823	0.0467777	0.568282
ENSRNOG00000055518	AABR07024303.1	KL568458.1:65160-91925	0.0129533	0	7.32378	0.0468486	0.568682
ENSRNOG00000014647	Cbfb	19:37127508-37171069	18.72	27.3113	-0.437499	0.0468504	0.568682
ENSRNOG00000000936	Stx2	12:31335372-31360254	25.2413	18.8483	0.504662	0.0468991	0.569032
ENSRNOG00000018803	Mrtfa	7:122234012-122403667	9.45263	13.9023	-0.450287	0.0470232	0.570295
ENSRNOG00000017703	Unc93b1	1:219140658-219183963	20.3151	31.0577	-0.491178	0.0470773	0.57071
ENSRNOG00000020980	AABR07006278.1	1:227648798-227906287	0.877575	2.17405	-1.54548	0.0472731	0.572841
ENSRNOG00000025643	Ccdc13	8:130437157-130475320	0.00272567	0.0457807	-3.85183	0.0473745	0.573334
XLOC_047298	XLOC_047298	15:61802308-61816274	1.54709	3.26737	-0.973223	0.0473949	0.573334
ENSRNOG00000024640	Oacyl	18:61377051-61432878	0.129124	0.04345	1.65961	0.047442	0.573334
ENSRNOG00000018070	Rnf182	17:24242642-24291025	0.228618	0.607677	-1.34495	0.047454	0.573334
ENSRNOG00000045760	Ebna1bp2	5:137670123-137674802	21.8374	13.5857	0.763824	0.0475379	0.573863
ENSRNOG00000015051	Golga7b	1:261497059-261516892	0.019864	0.321974	-3.20737	0.0478686	0.577125
ENSRNOG00000001762	Pcyt1a	11:71548222-71591502	21.8315	17.2306	0.431525	0.0480161	0.578417
ENSRNOG00000015994	Cd3d	8:49282460-49287110	0.0485597	0.588368	-3.53642	0.048091	0.578779
ENSRNOG00000008841	Orc1	5:128190708-128210445	11.5936	8.28426	0.566486	0.0481271	0.578779
ENSRNOG00000018414	Csf1r	18:56414488-56458300	62.6276	50.4539	0.39591	0.0481959	0.579226
ENSRNOG00000052469	Bmpr1a	16:10758527-10802512	10.0177	7.86083	0.445717	0.0482048	0.579226
ENSRNOG00000048329	AABR07066946.2	9:23431573-23459800	0.349256	0.0958447	1.85193	0.0483263	0.580443
ENSRNOG00000008052	Atp13a2	5:159512285-159531637	8.24251	13.4108	-0.564049	0.0483755	0.580559
ENSRNOG00000011857	Mtpn	4:63012011-63039422	49.3112	71.0774	-0.421578	0.0484052	0.580559
ENSRNOG00000042771	Apol3	7:118685022-118694015	5.33789	12.6278	-1.15751	0.0484171	0.580559
ENSRNOG00000026936	Mpig6b	20:5054583-5056488	2.64559	8.12614	-1.51733	0.0484473	0.580677
ENSRNOG00000005209	Spred1	3:108795235-108857556	17.6915	14.2319	0.408157	0.048553	0.580971
ENSRNOG00000043390	Samd12	7:92993330-93502591	0.0407273	0.207261	-1.82801	0.0487063	0.582076
ENSRNOG00000040108	RGD1565355	4:14001761-14251143	95.195	68.105	0.601225	0.0487948	0.58289
XLOC_027392	XLOC_027392	11:81508257-81517168	1.10138	0.387701	1.57812	0.0489269	0.583251
ENSRNOG00000022737	LOC691970	1:201741021-201816018	0.00442567	0	7.36801	0.0489894	0.58351
ENSRNOG00000030644	Mt-nd1	MT:2740-3694	1008.4	710.296	0.605868	0.049262	0.585552
ENSRNOG00000059683	Mpp2	10:89999917-90030639	7.01278	4.88261	0.610126	0.0493228	0.586018
ENSRNOG00000017511	Dcdc2	17:41838201-42031265	0.00161133	0	7.25092	0.0493441	0.586028
ENSRNOG00000048088	Mest	4:58052759-58195348	3.95286	5.90595	-0.48479	0.0494281	0.586782
ENSRNOG00000025321	AABR07007769.1	2:27630285-27742903	0	0.00337233	-7.35524	0.0495628	0.587828
ENSRNOG00000016483	Myo16	16:84575150-84939323	0.0807757	0.041072	1.06149	0.0496396	0.588317
ENSRNOG00000052219	Gm2a	10:40438356-40450930	74.031	107.419	-0.430132	0.0496837	0.588595
ENSRNOG00000000511	Srpk1	20:5831119-5865854	21.0457	16.5535	0.450637	0.0497445	0.589072
ENSRNOG00000006645	Ryr3	3:104117377-104504204	0.459478	0.274202	0.624868	0.0497809	0.589202
ENSRNOG00000012422	Tnik	2:113984646-114384894	2.25353	4.03527	-0.804992	0.0498758	0.589651
ENSRNOG00000017506	Cltb	17:10537365-10554989	10.7542	7.96412	0.527622	0.04998	0.590639

## Sheet: Dex_7d_vs_Control_7d. lncRNA
transcript_id	transcript_name	gene_id	gene_name	transcript_locus	Dex_7d_FPKM	Control_7d_FPKM	log2FoldChange	pvalue	padj
TCONS_00184191	LINC3384	XLOC_124445	XLOC_124445	6:77930425-78008509	5.33333e-06	1.29228	-13.6462	2.04068e-15	7.56214e-12
TCONS_00186653	Ighm-OT1	ENSRNOG00000034190	Ighm	6:138059576-138246688	0.385916	12.8695	-5.06273	1.31159e-14	3.40321e-11
TCONS_00047053	LINC860	XLOC_029898	XLOC_029898	11:85651867-85780892	0	0.615119	-15.17	5.24687e-14	1.26381e-10
TCONS_00186925	AABR07065883.1-OT3	ENSRNOG00000037495	AABR07065883.1	6:143520662-143636428	0	0.511008	-14.7296	7.03278e-12	1.1457e-08
TCONS_00047063	ENSRNOG00000050000-AS3	XLOC_029903	XLOC_029903	11:86057290-86092912	0	0.757185	-13.6125	3.09626e-09	2.61683e-06
TCONS_00180960	ENSRNOG00000034190-AS1	XLOC_122006	XLOC_122006	6:138195334-138250279	0	0.581414	-13.8521	3.53062e-09	2.93249e-06
TCONS_00131704	ENSRNOG00000004679-AS1	XLOC_088250	XLOC_088250	3:49995376-50120387	0.215183	0	13.5801	4.62262e-09	3.59178e-06
TCONS_00220175	LOC108351936-OT5	ENSRNOG00000021406	LOC108351936	9:64695881-64843888	0	0.410704	-14.7738	6.48076e-09	4.73036e-06
TCONS_00038512	Ikzf3-OT1	ENSRNOG00000007200	Ikzf3	10:86474542-86506667	0	0.746695	-13.4298	9.48837e-09	6.34851e-06
TCONS_00047036	ENSRNOG00000053208-AS1	XLOC_029882	XLOC_029882	11:85586201-85677241	0	0.1968	-13.0171	5.60921e-08	3.14207e-05
TCONS_00122021	Ap1ar-OT1	ENSRNOG00000024492	Ap1ar	2:232131307-232220178	0	0.252424	-13.3251	9.24162e-08	4.78716e-05
TCONS_00126277	LINC2399	XLOC_084835	XLOC_084835	20:50076823-50082809	0	2.61567	-12.8219	9.71785e-08	4.92787e-05
TCONS_00039068	Plcd3-OT1	ENSRNOG00000003033	Plcd3	10:91129549-91217763	2.25809	0	16.4259	1.51641e-07	7.23282e-05
TCONS_00047056	LINC863	XLOC_029900	XLOC_029900	11:85718558-85778519	0	0.253727	-12.7857	1.84469e-07	8.46342e-05
ENSRNOT00000087425	AC107174.2-201	ENSRNOG00000060513	AC107174.2	8:48308783-48379819	0	0.187193	-12.5868	2.09902e-07	9.36278e-05
TCONS_00150578	AABR07060980.1-OT1	ENSRNOG00000056052	AABR07060980.1	4:102147211-102187733	0	0.327038	-12.5813	2.38984e-07	0.000103354
TCONS_00140659	LINC2627	XLOC_094315	XLOC_094315	3:53790010-53820982	0	0.332103	-12.212	8.85007e-07	0.000315406
TCONS_00162677	ENSRNOG00000024729-AS1	XLOC_109582	XLOC_109582	5:60171529-60186808	0	0.648522	-12.1601	9.98367e-07	0.000346009
ENSRNOT00000087589	LOC100910750-202	ENSRNOG00000055850	LOC100910750	14:61650937-61668509	0	5.27435	-15.3866	1.06607e-06	0.000361669
TCONS_00047052	LINC859	XLOC_029897	XLOC_029897	11:85649690-85720110	0	0.141788	-12.1826	1.35694e-06	0.00044469
TCONS_00130727	AABR07051556.1-OT1	ENSRNOG00000046289	AABR07051556.1	3:17001644-17044859	0	0.241309	-12.2461	1.43693e-06	0.00046772
TCONS_00047051	LINC858	XLOC_029896	XLOC_029896	11:85645345-85680716	0	0.265471	-12.0823	1.59783e-06	0.000509762
TCONS_00091079	ENSRNOG00000016616-AS1	XLOC_060134	XLOC_060134	17:39023717-39076836	0.205049	0	12.2493	2.09551e-06	0.000630932
ENSRNOT00000091080	AABR07044980.1-201	ENSRNOG00000061835	AABR07044980.1	20:30041461-30263742	0.53851	3.90587	-2.88294	2.41702e-06	0.00071875
TCONS_00205298	Cpne4-OT1	ENSRNOG00000026577	Cpne4	8:113086413-113173642	0	0.0923533	-11.8656	2.44126e-06	0.000721505
TCONS_00039471	Slc16a6-OT2	ENSRNOG00000000245	Slc16a6	10:97731372-97805668	0	0.568516	-14.2705	3.0066e-06	0.000847016
TCONS_00146159	LINC2746	XLOC_098061	XLOC_098061	3:171718849-171743595	0	0.377244	-10.2274	4.40125e-06	0.00117141
TCONS_00047054	LINC861	XLOC_029899	XLOC_029899	11:85680033-85703042	0	0.277565	-11.5344	6.73308e-06	0.00166338
TCONS_00110456	LINC2079	XLOC_073975	XLOC_073975	2:166986461-167004148	0	0.425571	-11.7519	9.05832e-06	0.00213909
TCONS_00065852	ENSRNOG00000002039-AS2	XLOC_042331	XLOC_042331	14:2892760-2916883	0	0.267112	-11.5368	9.38513e-06	0.00219475
TCONS_00014591	LINC237	XLOC_009340	XLOC_009340	1:45292014-45310522	0	0.323918	-11.4318	1.19439e-05	0.00268667
TCONS_00107444	AABR07008142.1-OT1	ENSRNOG00000047990	AABR07008142.1	2:45578821-45621855	0	0.133978	-11.3907	1.20257e-05	0.00268667
ENSRNOT00000073957	AABR07037436.1-207	ENSRNOG00000049908	AABR07037436.1	X:20821462-20833399	0.000976667	2.27742	-10.4749	1.44818e-05	0.00315677
TCONS_00074717	Ttc5-OT1	ENSRNOG00000008850	Ttc5	15:27687057-27739269	2898.29	0	26.131	1.5203e-05	0.00328425
TCONS_00101111	LINC1885	XLOC_067254	XLOC_067254	19:32262836-32289960	0	0.244884	-11.5731	1.56475e-05	0.00335023
ENSRNOT00000090860	AABR07057997.1-201	ENSRNOG00000054801	AABR07057997.1	7:97356333-97462928	0.056661	0	11.4801	1.82566e-05	0.00380732
TCONS_00019603	ENSRNOG00000022635-AS1	XLOC_012613	XLOC_012613	1:157030872-157125409	0	0.0549453	-11.2323	2.22968e-05	0.00436637
TCONS_00032001	Gna13-OT1	ENSRNOG00000036745	Gna13	10:97621345-97684730	0.37984	0	13.4603	3.86582e-05	0.00689748
TCONS_00112876	ENSRNOG00000049260-AS1	XLOC_075437	XLOC_075437	2:222931600-222994698	0	0.378225	-13.4151	4.21491e-05	0.00733029
TCONS_00162214	LINC3000	XLOC_109270	XLOC_109270	5:47485876-47528805	0.0636953	1.64134	-4.71896	5.36822e-05	0.00880169
TCONS_00035451	ENSRNOG00000026745-AS1	XLOC_022304	XLOC_022304	10:39694686-39708174	0.298686	0	10.8423	5.56151e-05	0.00905135
TCONS_00116808	LOC499573-OT1	ENSRNOG00000033449	LOC499573	2:95044894-95173749	0	0.166971	-13.2639	5.72664e-05	0.00925756
TCONS_00150581	LINC2802	XLOC_101179	XLOC_101179	4:102168661-102178099	0	0.413689	-10.8127	5.83199e-05	0.00930298
TCONS_00054543	B3galt2-OT2	ENSRNOG00000003251	B3galt2	13:60403769-60470517	0	0.32316	-13.2647	6.73723e-05	0.0104025
TCONS_00046893	Map3k13-OT2	ENSRNOG00000025423	Map3k13	11:82920679-82938372	0	0.201127	-10.6905	7.27947e-05	0.010857
TCONS_00018280	LINC305	XLOC_011658	XLOC_011658	1:119528895-119555635	0.152852	0	10.8315	9.07431e-05	0.0126362
TCONS_00179937	AABR07065353.1-OT3	ENSRNOG00000037891	AABR07065353.1	6:123183740-123409097	0	0.144807	-13.8929	9.26007e-05	0.0127456
TCONS_00088006	Celf2-OT1	ENSRNOG00000023661	Celf2	17:75307220-75520746	0.0114917	0.426291	-5.23681	9.49765e-05	0.0129983
ENSRNOT00000088115	AC134759.1-201	ENSRNOG00000057198	AC134759.1	1:82371389-82373255	0	1.52462	-10.3658	9.97495e-05	0.0135744
TCONS_00201012	Ubl5-OT6	ENSRNOG00000020442	Ubl5	8:21656698-21665038	0	2.01555	-12.9407	0.000101193	0.013732
TCONS_00181040	LINC3303	XLOC_122042	XLOC_122042	6:141338750-141348543	0	0.296829	-10.3962	0.000109872	0.0145811
TCONS_00043601	LINC781	XLOC_027533	XLOC_027533	11:85646221-85680745	0	0.536538	-13.0816	0.000110853	0.014671
TCONS_00179936	AABR07065353.1-OT2	ENSRNOG00000037891	AABR07065353.1	6:123183740-123409097	0	0.125241	-13.6835	0.00011603	0.0151892
TCONS_00064866	Abca13-OT1	ENSRNOG00000025645	Abca13	14:89550646-89592185	0.0778973	0	10.5768	0.000117721	0.0153688
TCONS_00089032	ENSRNOG00000031349-AS7	XLOC_058641	XLOC_058641	17:2915184-3076852	0	0.105619	-12.9616	0.000142163	0.0174263
TCONS_00028968	LINC494	XLOC_018335	XLOC_018335	10:56008899-56028662	0.214878	0	10.9238	0.000144773	0.0175675
TCONS_00153782	Etfrf1-OT1	ENSRNOG00000015848	Etfrf1	4:179481263-179489295	0.328571	0	10.22	0.000163577	0.0192199
TCONS_00035940	ENSRNOG00000002304-AS1	XLOC_022594	XLOC_022594	10:47415700-47421194	0	0.44736	-10.1546	0.00016515	0.0193105
TCONS_00075530	LINC1392	XLOC_049076	XLOC_049076	15:41961325-41982378	0	0.575517	-12.436	0.000186975	0.0212438
TCONS_00209719	Usp3-OT1	ENSRNOG00000017714	Usp3	8:72253774-72284979	0	0.355883	-12.3419	0.000188975	0.0213343
TCONS_00051471	LINC945	XLOC_032444	XLOC_032444	12:20181524-20193931	0	0.202303	-10.1937	0.000195702	0.0218694
ENSRNOT00000076843	AABR07039316.1-201	ENSRNOG00000022286	AABR07039316.1	X:73664083-73691861	0.08309	0	10.0412	0.000207946	0.0226131
TCONS_00211043	AABR07071195.1-OT1	ENSRNOG00000030296	AABR07071195.1	8:104040782-104183326	0.0427247	0.608902	-3.8673	0.000210774	0.0227664
TCONS_00203051	ENSRNOG00000019677-AS4	XLOC_137132	XLOC_137132	8:62547101-62572475	0	0.0864473	-9.99265	0.000214853	0.0230007
TCONS_00142674	Gpr176-OT1	ENSRNOG00000005971	Gpr176	3:110082827-110140756	0.221909	0	12.4794	0.000216928	0.0231202
TCONS_00032341	Smim5-OT2	ENSRNOG00000049642	Smim5	10:104451222-104462405	0	0.191459	-9.96497	0.000223453	0.0236067
TCONS_00116161	LINC2200	XLOC_077805	XLOC_077805	2:57805918-57809702	0	0.553875	-9.92658	0.000230864	0.0242301
ENSRNOT00000092862	LOC102555023-202	ENSRNOG00000022163	LOC102555023	18:12637441-12641147	0	0.576186	-9.95203	0.000238727	0.0247854
TCONS_00074946	ENSRNOG00000050432-AS1	XLOC_048792	XLOC_048792	15:31777584-31995728	0	0.0452197	-12.1505	0.000243099	0.0250772
TCONS_00033488	Smim22-OT4	ENSRNOG00000042344	Smim22	10:10725736-10767389	0	0.232575	-12.1206	0.000257796	0.0260194
TCONS_00082000	LINC1499	XLOC_053734	XLOC_053734	16:14501264-14512125	0	0.202425	-9.988	0.000264217	0.0263536
TCONS_00042394	ENSRNOG00000028077-AS2	XLOC_026704	XLOC_026704	11:61205871-61210326	0	0.445451	-9.84883	0.000282628	0.0276173
TCONS_00003207	ENSRNOG00000015852-AS1	XLOC_002096	XLOC_002096	1:78546591-78573594	0.123388	0	10.5439	0.000290725	0.0281232
TCONS_00210497	LINC3862	XLOC_142099	XLOC_142099	8:90790964-90804279	0.00365633	0.569925	-7.0028	0.000295297	0.0281309
ENSRNOT00000093345	Supt5h-202	ENSRNOG00000032034	Supt5h	1:85460888-85466854	0.365021	0	9.94872	0.000296909	0.0282064
TCONS_00079141	ENSRNOG00000042504-AS1	XLOC_051679	XLOC_051679	16:21473184-21481960	0.27512	0	10.0825	0.000302705	0.0284815
TCONS_00155593	LINC2868	XLOC_104680	XLOC_104680	4:44477601-44531191	0	0.161605	-11.9841	0.000325262	0.0301331
TCONS_00139551	LINC2601	XLOC_093570	XLOC_093570	3:13991179-13998808	0	1.12695	-11.9713	0.00032888	0.0304097
TCONS_00032336	Smim5-OT7	ENSRNOG00000049642	Smim5	10:104451222-104462405	0	0.159195	-9.68982	0.00034699	0.0314874
TCONS_00071439	LINC1322	XLOC_046236	XLOC_046236	15:33835055-33841357	0	0.312694	-9.84106	0.000347071	0.0314874
TCONS_00223242	LINC4147	XLOC_150614	XLOC_150614	KL568157.1:3208700-3219570	10.7699	0.0696263	7.23218	0.000350038	0.0316969
TCONS_00133200	LINC2503	XLOC_089320	XLOC_089320	3:81448045-81489850	0	0.218814	-12.0282	0.000358528	0.0322686
TCONS_00042371	ENSRNOG00000039048-AS1	XLOC_026693	XLOC_026693	11:60857156-60882416	0.0747767	0	9.75295	0.000367928	0.0327626
ENSRNOT00000084705	AABR07035780.3-201	ENSRNOG00000058398	AABR07035780.3	12:22356942-22359729	0	0.614315	-9.63873	0.000369807	0.0328691
TCONS_00011851	Lcor-OT1	ENSRNOG00000042679	Lcor	1:260732485-260775452	0.31618	0	10.6216	0.000373884	0.0330486
ENSRNOT00000086171	AABR07058724.1-201	ENSRNOG00000053433	AABR07058724.1	7:135124846-135146576	0.0851833	0	9.75991	0.00037762	0.033314
TCONS_00009152	LINC153	XLOC_005752	XLOC_005752	1:214097276-214106689	0.857142	0	11.8714	0.000378501	0.033314
TCONS_00202128	ENSRNOG00000032364-AS7	XLOC_136552	XLOC_136552	8:46740605-46775022	0.242742	0	11.9019	0.000381122	0.0333821
TCONS_00146145	LINC2744	XLOC_098061	XLOC_098061	3:171671992-171743588	0.117026	0	11.8563	0.000386801	0.0336956
ENSRNOT00000092040	AABR07035780.2-202	ENSRNOG00000058123	AABR07035780.2	12:22366554-22372040	0	0.313006	-9.6354	0.000392637	0.0338977
TCONS_00072981	LINC1339	XLOC_047336	XLOC_047336	15:67136744-67187868	0	0.185025	-12.1086	0.00039343	0.0339053
TCONS_00019839	LINC353	XLOC_012762	XLOC_012762	1:164341875-164350141	0.230496	0	9.78353	0.000402233	0.0345404
TCONS_00047520	ENSRNOG00000054013-AS1	XLOC_030158	XLOC_030158	12:2264802-2278076	0	0.153844	-9.87634	0.000465611	0.0384081
TCONS_00016210	LOC103689961-OT2	ENSRNOG00000051483	LOC103689961	1:77803475-77808542	5.40443	0.00133233	10.5243	0.000488958	0.0399239
TCONS_00140664	ENSRNOG00000007625-AS1	XLOC_094319	XLOC_094319	3:54220304-54264855	0.161544	0	11.6852	0.000501109	0.0403753
TCONS_00145650	LINC2710	XLOC_097683	XLOC_097683	3:162916905-162922720	0	0.269131	-9.50626	0.000502358	0.0403753
TCONS_00106804	ENSRNOG00000033693-AS1	XLOC_071213	XLOC_071213	2:30405206-30453772	0.143085	0	11.6796	0.000504544	0.0403753
TCONS_00104112	LINC1934	XLOC_069353	XLOC_069353	19:30173487-30341495	0	0.310135	-14.5296	0.000517374	0.040656
TCONS_00195344	LINC3612	XLOC_131819	XLOC_131819	7:33962744-33986738	0.33545	0	11.9176	0.00051983	0.040656
TCONS_00095250	LINC1785	XLOC_063109	XLOC_063109	18:50475429-50495284	0	0.0878937	-9.66556	0.000524217	0.0407975
TCONS_00213369	AABR07066677.1-OT1	ENSRNOG00000049939	AABR07066677.1	9:12311282-12349075	0.178631	0	11.6132	0.000529887	0.0410398
TCONS_00150582	LINC2803	XLOC_101180	XLOC_101180	4:102173966-102179565	0	0.261211	-9.41131	0.000556451	0.0423791
TCONS_00193678	LINC3570	XLOC_130780	XLOC_130780	7:144584434-144595622	0.817432	0.00210467	8.1605	0.000576609	0.0435385
TCONS_00222070	LINC4109	XLOC_149695	XLOC_149695	9:100360330-100368556	0	0.191341	-9.5089	0.000584452	0.0439241
TCONS_00153113	ENSRNOG00000037076-AS1	XLOC_102839	XLOC_102839	4:162187447-162250697	0.220076	2.01734	-3.1905	0.00059991	0.0449457
TCONS_00184064	LINC3379	XLOC_124363	XLOC_124363	6:75224241-75228516	0	0.338688	-9.39989	0.000604718	0.0451654
ENSRNOT00000078853	AABR07065387.1-202	ENSRNOG00000061041	AABR07065387.1	6:125276633-125304605	0	0.238932	-11.5978	0.000609499	0.045452
TCONS_00130894	AABR07051741.1-OT1	ENSRNOG00000057548	AABR07051741.1	3:20565972-20649881	0	0.0984497	-11.9163	0.000651893	0.0478379
TCONS_00216637	Tex44-OT2	ENSRNOG00000018559	Tex44	9:93441089-93507471	0	0.653832	-14.2661	0.000662903	0.0483859
TCONS_00039470	Slc16a6-OT1	ENSRNOG00000000245	Slc16a6	10:97731372-97774161	1.42005	0.079773	4.15301	0.000666564	0.0484587
TCONS_00035860	LINC613	XLOC_022542	XLOC_022542	10:46465606-46473626	0	0.219976	-9.67155	0.000671343	0.0486335
TCONS_00050778	ENSRNOG00000033411-AS1	XLOC_032016	XLOC_032016	12:10030759-10065924	0.182308	0	11.4956	0.000690341	0.0496366
TCONS_00106273	ENSRNOG00000029185-AS1	XLOC_070788	XLOC_070788	2:13637613-13666072	0.205127	0	11.4162	0.000706586	0.0505781
TCONS_00167362	LINC3077	XLOC_112641	XLOC_112641	5:166850779-166861106	0.160345	0	9.62137	0.000710362	0.0506978
TCONS_00058165	LINC1080	XLOC_036916	XLOC_036916	13:50897686-50901141	0	0.467908	-9.5724	0.00074574	0.0520656
TCONS_00150585	LINC2805	XLOC_101183	XLOC_101183	4:102176448-102182446	0	0.256634	-9.46658	0.000791851	0.0544234
TCONS_00043742	ENSRNOG00000001839-AS1	XLOC_027587	XLOC_027587	11:87157627-87158880	0	0.984882	-9.16939	0.000794197	0.0544234
TCONS_00094260	1700066B19Rik-OT1	ENSRNOG00000039592	1700066B19Rik	18:28460429-28577041	0.318798	0	14.1403	0.000804357	0.0545762
ENSRNOT00000088309	AABR07033720.1-201	ENSRNOG00000061472	AABR07033720.1	11:37458731-37599408	0	0.0366077	-11.2174	0.000823442	0.0551718
TCONS_00146856	ENSRNOG00000010453-AS1	XLOC_098507	XLOC_098507	4:7574118-7582189	0.658949	0	11.2941	0.000848243	0.0561947
TCONS_00139955	LINC2619	XLOC_093853	XLOC_093853	3:26308829-26349634	0.131436	0	11.3152	0.000852923	0.0562545
TCONS_00144338	LINC2686	XLOC_096874	XLOC_096874	3:140761187-140783568	0.258501	0	11.3411	0.000898052	0.0584632
TCONS_00133929	LINC2521	XLOC_089895	XLOC_089895	3:109220303-109281956	0.0844347	0	11.1711	0.000922262	0.0596363
TCONS_00113143	LINC2134	XLOC_075637	XLOC_075637	2:231710546-231714434	0	0.306901	-9.12342	0.000929325	0.0599322
ENSRNOT00000081159	LOC103690118-201	ENSRNOG00000057054	LOC103690118	10:12180-24144	0.449777	0	11.2449	0.000935997	0.0602817
TCONS_00160315	LINC2958	XLOC_107897	XLOC_107897	4:168656792-168666392	0	0.499353	-11.1308	0.000955886	0.0613167
TCONS_00199628	ENSRNOG00000022844-AS1	XLOC_134900	XLOC_134900	7:133905887-133935683	0	0.186035	-11.3054	0.000960294	0.0614358
TCONS_00162678	ENSRNOG00000024729-AS2	XLOC_109582	XLOC_109582	5:60171660-60196803	0.002313	0.333454	-7.1537	0.000995891	0.0628782
TCONS_00075449	ENSRNOG00000013707-AS1	XLOC_049033	XLOC_049033	15:41000752-41040193	0	0.119677	-11.1014	0.00102143	0.0638876
TCONS_00133522	LOC691083-OT1	ENSRNOG00000013437	LOC691083	3:95232166-95466219	0	0.12559	-13.7476	0.00102249	0.0638876
ENSRNOT00000092884	LOC102555023-203	ENSRNOG00000022163	LOC102555023	18:12638554-12641158	0	0.559131	-9.4164	0.00103677	0.0645229
TCONS_00042395	ENSRNOG00000028077-AS1	XLOC_026704	XLOC_026704	11:61205871-61210326	0	0.359777	-9.55448	0.00104987	0.0650208
TCONS_00184193	LINC3385	XLOC_124445	XLOC_124445	6:77930425-78053093	0.27167	0	13.839	0.00104989	0.0650208
TCONS_00096190	Smad2-OT1	ENSRNOG00000018140	Smad2	18:72549656-72587909	0	0.117656	-11.0154	0.00105007	0.0650208
TCONS_00216636	Tex44-OT1	ENSRNOG00000018559	Tex44	9:93436896-93512782	0	0.351661	-13.6081	0.00114539	0.0697529
TCONS_00041881	LINC744	XLOC_026345	XLOC_026345	11:42895629-42921112	0	0.241679	-11.4524	0.0011783	0.0711319
TCONS_00052376	ENSRNOG00000045574-AS2	XLOC_032938	XLOC_032938	12:38920220-38980474	0	0.455909	-13.6061	0.00118073	0.0711898
TCONS_00145975	ENSRNOG00000053380-AS1	XLOC_097939	XLOC_097939	3:167408316-167630613	0	0.124816	-13.6593	0.00119443	0.0719255
TCONS_00156582	LINC2892	XLOC_105334	XLOC_105334	4:77447433-77453338	0.728401	0	10.9858	0.00121093	0.0722866
TCONS_00133816	LINC2518	XLOC_089796	XLOC_089796	3:105298613-105304807	0	0.204653	-9.20902	0.00121644	0.0724358
TCONS_00157243	ENSRNOG00000029321-AS1	XLOC_105808	XLOC_105808	4:91235724-91374069	0.213923	0	13.6678	0.00121984	0.0724597
TCONS_00015558	LINC261	XLOC_010121	XLOC_010121	1:61258755-61262489	0.262384	0	8.83067	0.0012493	0.0737545
TCONS_00153406	H2aj-OT1	ENSRNOG00000033045	H2aj	4:170763479-170801008	4.65508	0.037642	6.93451	0.00127149	0.0743356
TCONS_00091257	AABR07027799.1-OT1	ENSRNOG00000056731	AABR07027799.1	17:44389808-44425335	0	0.134458	-11.09	0.001285	0.074763
TCONS_00068203	LINC1265	XLOC_044032	XLOC_044032	14:78402073-78405388	0	0.272708	-8.72151	0.0013135	0.0756899
TCONS_00190508	Oxr1-OT1	ENSRNOG00000056487	Oxr1	7:80351123-80415860	0	0.0694453	-11.0059	0.00132807	0.0762135
TCONS_00039612	LINC688	XLOC_024826	XLOC_024826	10:101186520-101212877	0	0.168221	-10.9846	0.00137927	0.0783551
TCONS_00058397	LINC1082	XLOC_037057	XLOC_037057	13:54576456-54749949	0	0.022927	-10.8611	0.00138152	0.0783901
TCONS_00189050	ENSRNOG00000006426-AS1	XLOC_127612	XLOC_127612	7:50079710-50219046	0.186376	0	13.4958	0.00138746	0.0786345
TCONS_00070484	LINC1306	XLOC_045570	XLOC_045570	15:16070528-16228771	0	0.144128	-13.3381	0.00143804	0.0810246
ENSRNOT00000087282	AABR07022072.2-201	ENSRNOG00000058959	AABR07022072.2	13:105847361-105852725	0	0.174209	-8.7673	0.00145049	0.0811569
TCONS_00074553	LINC1379	XLOC_048529	XLOC_048529	15:20858752-20864732	0	0.253436	-9.46152	0.00147345	0.0820602
ENSRNOT00000080867	AABR07037698.1-201	ENSRNOG00000054904	AABR07037698.1	X:28577269-28583900	0.126515	0	8.58571	0.00156519	0.0857811
TCONS_00080163	Smim18-OT2	ENSRNOG00000049689	Smim18	16:62129550-62164312	0	0.104938	-10.7133	0.00157555	0.086167
TCONS_00064026	Rab5a-OT1	ENSRNOG00000057056	Rab5a	14:72890166-72968813	0.267017	0	13.3163	0.00159201	0.0869543
TCONS_00160984	AABR07046635.1-OT2	ENSRNOG00000047780	AABR07046635.1	5:145754-252663	0.0355957	0	10.8262	0.00167132	0.0905671
TCONS_00014592	LINC238	XLOC_009340	XLOC_009340	1:45305271-45312547	0	0.186158	-9.27919	0.0016908	0.0913148
TCONS_00175894	ENSRNOG00000054165-AS1	XLOC_118421	XLOC_118421	6:26441656-26444524	0	0.276396	-8.54145	0.00173251	0.0927356
TCONS_00220172	LOC108351936-OT2	ENSRNOG00000021406	LOC108351936	9:64643569-64843917	0	0.097861	-13.1198	0.00173845	0.0928316
TCONS_00211024	Trpc1-OT1	ENSRNOG00000054902	Trpc1	8:103501843-103508541	0.121678	0	8.53766	0.00174835	0.0930665
TCONS_00201007	Ubl5-OT1	ENSRNOG00000020442	Ubl5	8:21656675-21665038	0	0.784465	-11.5417	0.00176315	0.0935687
TCONS_00103049	ENSRNOG00000050191-AS1	XLOC_068674	XLOC_068674	19:62111632-62134156	0.168305	0	10.7104	0.00178386	0.094228
TCONS_00057893	ENSRNOG00000004405-AS2	XLOC_036756	XLOC_036756	13:47567980-47601107	0	0.101371	-10.5924	0.0018793	0.0972434
TCONS_00224315	LINC4177	XLOC_151409	XLOC_151409	X:18440845-18457468	0	0.204043	-10.6319	0.00188492	0.0974295
TCONS_00040644	ENSRNOG00000060785-AS1	XLOC_025487	XLOC_025487	10:111857902-112148608	0	0.0617983	-12.9939	0.00191909	0.0988772
TCONS_00065436	LINC1204	XLOC_042011	XLOC_042011	14:109233555-109238080	0	0.27012	-9.14419	0.00195674	0.100602
ENSRNOT00000087456	AABR07024457.1-201	ENSRNOG00000059374	AABR07024457.1	16:447176-511926	0	0.0521933	-10.5941	0.00199145	0.101412
TCONS_00030263	Ska2-OT1	ENSRNOG00000025981	Ska2	10:74413989-74431922	0.181756	0	10.5346	0.00201818	0.102557
TCONS_00203903	LINC3758	XLOC_137727	XLOC_137727	8:76339547-76364250	0	0.122597	-10.4534	0.00202999	0.102822
TCONS_00111754	LINC2106	XLOC_074704	XLOC_074704	2:198091281-198094079	0	0.284871	-8.54827	0.00207726	0.10424
TCONS_00219299	LINC4063	XLOC_147791	XLOC_147791	9:42820074-42829456	0	0.319395	-10.4554	0.00208839	0.10458
TCONS_00156022	LINC2878	XLOC_104992	XLOC_104992	4:58372738-58383868	0	0.142004	-9.49964	0.00210261	0.104856
TCONS_00170738	ENSRNOG00000043151-AS1	XLOC_114979	XLOC_114979	5:103333082-103349033	0	0.19018	-10.4715	0.00216602	0.107096
TCONS_00037263	Omg-OT2	ENSRNOG00000014107	Omg	10:66755143-66930851	0.101242	0	12.9337	0.00216753	0.107096
TCONS_00187104	LINC3448	XLOC_126332	XLOC_126332	7:1012924-1020821	0	0.387594	-10.456	0.00217556	0.107163
TCONS_00047037	LINC857	XLOC_029883	XLOC_029883	11:85588099-85591361	0	0.21649	-8.38235	0.00218179	0.10736
TCONS_00063833	Lcorl-OT1	ENSRNOG00000003787	Lcorl	14:69800156-69854472	0.294761	0	12.9249	0.00218806	0.107449
TCONS_00221839	LINC4105	XLOC_149532	XLOC_149532	9:97530946-97537244	0.0983037	0	8.16339	0.00221798	0.108366
TCONS_00154617	AABR07059201.1-OT1	ENSRNOG00000021533	AABR07059201.1	4:8371687-8540698	0.101416	0	12.8965	0.0022339	0.108703
TCONS_00000739	Akap7-OT2	ENSRNOG00000013202	Akap7	1:21235895-21392239	0.0984803	0	12.8686	0.00226154	0.109385
TCONS_00145651	LINC2711	XLOC_097683	XLOC_097683	3:162916905-162922721	0	0.139838	-8.58192	0.00227805	0.109948
TCONS_00104202	ENSRNOG00000011671-AS1	XLOC_069423	XLOC_069423	19:32335973-32376528	0.077871	0	10.4747	0.00232042	0.111469
TCONS_00025634	LINC449	XLOC_016278	XLOC_016278	1:279368147-279502982	0.12333	0	12.8362	0.00233008	0.111687
TCONS_00047475	Arhgef18-OT1	ENSRNOG00000028090	Arhgef18	12:1864854-1912330	0.0775037	0.940266	-3.62502	0.00233721	0.11181
TCONS_00207981	AABR07069803.1-OT1	ENSRNOG00000043384	AABR07069803.1	8:40366593-40576179	0.071592	0	12.8315	0.0023412	0.11189
ENSRNOT00000089225	AABR07052643.1-201	ENSRNOG00000056573	AABR07052643.1	3:67676281-67683488	0.0822337	0	8.10852	0.00236012	0.112459
ENSRNOT00000081717	AABR07058838.1-201	ENSRNOG00000056773	AABR07058838.1	7:138982285-138989684	0	0.112954	-8.6208	0.00237476	0.112921
TCONS_00205458	LINC3790	XLOC_138776	XLOC_138776	8:116119682-116133091	0.210132	0	10.3563	0.00240496	0.11391
TCONS_00115874	LINC2191	XLOC_077596	XLOC_077596	2:46258749-46261028	0	0.292877	-8.29484	0.0024172	0.114051
TCONS_00114451	LINC2162	XLOC_076585	XLOC_076585	2:12143172-12252409	0	0.125906	-12.6524	0.00242716	0.114269
TCONS_00121471	LINC2323	XLOC_081661	XLOC_081661	2:218726230-218746655	0	0.162196	-10.5968	0.00244246	0.11465
TCONS_00129402	LINC2447	XLOC_086774	XLOC_086774	20:50077208-50078718	0	0.375249	-8.05742	0.00246381	0.115234
TCONS_00223142	LINC4143	XLOC_150516	XLOC_150516	KL568103.1:3928-4554	0	0.96461	-8.16086	0.00249791	0.116265
TCONS_00122589	LINC2346	XLOC_082477	XLOC_082477	2:249030391-249033278	0	0.19807	-8.07464	0.00254286	0.117408
TCONS_00211048	AABR07071195.1-OT5	ENSRNOG00000030296	AABR07071195.1	8:104079484-104183326	0	0.131327	-12.5961	0.00259676	0.119191
TCONS_00144832	ENSRNOG00000016352-AS1	XLOC_097236	XLOC_097236	3:149922983-149941992	0	0.174581	-10.5621	0.00260283	0.119191
TCONS_00107638	LINC2008	XLOC_071865	XLOC_071865	2:52672374-52710917	0.0986827	0	10.8485	0.00262406	0.119417
TCONS_00055532	LINC1019	XLOC_034947	XLOC_034947	13:85642095-85655281	0	0.20419	-10.2911	0.00262525	0.119417
TCONS_00137637	LINC2582	XLOC_092446	XLOC_092446	3:168084379-168086544	0	0.25815	-8.04527	0.00270116	0.121726
TCONS_00198136	ENSRNOG00000009539-AS1	XLOC_134016	XLOC_134016	7:110101803-110108353	0	0.416954	-10.2892	0.0027173	0.122339
TCONS_00107903	LINC2022	XLOC_072059	XLOC_072059	2:58120147-58137550	0.750344	0	12.6312	0.00273342	0.122836
TCONS_00197645	ENSRNOG00000008978-AS1	XLOC_133622	XLOC_133622	7:98736793-98770385	0.080269	0	10.3247	0.00276207	0.123404
TCONS_00108673	ENSRNOG00000008971-AS1	XLOC_072618	XLOC_072618	2:100309759-100417216	0	0.118476	-12.497	0.00276449	0.123404
TCONS_00196246	LINC3635	XLOC_132543	XLOC_132543	7:61511186-61618694	0	0.112076	-12.4613	0.00276919	0.123404
TCONS_00190402	Dcstamp-OT1	ENSRNOG00000004704	Dcstamp	7:78595741-78679118	0.153214	0	12.5993	0.00279102	0.123921
TCONS_00090733	LINC1692	XLOC_059840	XLOC_059840	17:31803274-31806706	0	0.156231	-7.99201	0.00281438	0.12453
ENSRNOT00000082374	AABR07045483.1-201	ENSRNOG00000060038	AABR07045483.1	20:48814197-48816205	0	0.260157	-7.94405	0.00281765	0.12453
TCONS_00205983	LINC3795	XLOC_139004	XLOC_139004	8:122685630-122696598	0	0.237874	-10.2271	0.00287465	0.126353
TCONS_00095169	LINC1778	XLOC_063032	XLOC_063032	18:48975393-49102856	0.095508	0	12.5303	0.00293056	0.127893
TCONS_00208686	LINC3835	XLOC_140849	XLOC_140849	8:54584532-54590537	0.098401	0	8.07606	0.00293781	0.127962
TCONS_00210875	LINC3872	XLOC_142348	XLOC_142348	8:98191447-98194639	0	0.24088	-8.49354	0.00301352	0.130445
TCONS_00090469	ENSRNOG00000024111-AS3	XLOC_059682	XLOC_059682	17:27487480-27496249	0	0.128647	-9.05889	0.00304694	0.13094
TCONS_00107104	LINC1999	XLOC_071438	XLOC_071438	2:38300037-38316422	0.111791	0.000242333	7.9024	0.0030575	0.131276
TCONS_00165397	LINC3054	XLOC_111481	XLOC_111481	5:138774506-138867897	0.135492	0	12.459	0.00307172	0.131769
TCONS_00156411	LINC2887	XLOC_105246	XLOC_105246	4:70833358-70836328	0	0.292965	-8.6566	0.00311055	0.132844
TCONS_00109173	Dnajc19-OT4	ENSRNOG00000049819	Dnajc19	2:120520990-120570353	0	0.236228	-12.4094	0.00311937	0.132984
TCONS_00163319	ENSRNOG00000050595-AS3	XLOC_110027	XLOC_110027	5:77831697-77945159	0	0.0991667	-12.319	0.0031886	0.134862
TCONS_00168572	LINC3093	XLOC_113462	XLOC_113462	5:18986563-19001798	0.158777	0	10.1142	0.00325592	0.136749
TCONS_00082982	LINC1509	XLOC_054351	XLOC_054351	16:36066766-36074712	1.37561	0	12.3744	0.00328241	0.137621
ENSRNOT00000082773	Catip-205	ENSRNOG00000037835	Catip	9:81646266-81649646	0.156129	0	7.98407	0.0033418	0.139263
TCONS_00222326	Gin1-OT1	ENSRNOG00000011962	Gin1	9:111208206-111246987	0.115261	0.000207	7.7909	0.00335993	0.139897
TCONS_00104692	Pkd1l3-OT4	ENSRNOG00000052310	Pkd1l3	19:42017999-42092259	0.144204	0	12.3448	0.00336721	0.139919
ENSRNOT00000088122	AABR07019086.1-202	ENSRNOG00000053968	AABR07019086.1	15:87453035-87540474	0.135241	0	12.3449	0.00336917	0.139919
TCONS_00050320	LINC918	XLOC_031715	XLOC_031715	12:853676-866428	0	0.176004	-10.0152	0.00342775	0.141377
TCONS_00114407	LINC2160	XLOC_076548	XLOC_076548	2:11440685-11482529	0.0575513	0	10.064	0.00344071	0.141522
TCONS_00031832	Milr1-OT1	ENSRNOG00000042524	Milr1	10:94948500-94962312	0	0.155635	-9.95424	0.00344393	0.141522
TCONS_00117947	ENSRNOG00000042283-AS1	XLOC_079301	XLOC_079301	2:122867871-122870661	0.192204	0	7.92871	0.00346931	0.141877
TCONS_00093598	LINC1757	XLOC_061949	XLOC_061949	18:6613711-6626504	0	0.178455	-10.0593	0.00348892	0.142316
TCONS_00190941	LINC3533	XLOC_129108	XLOC_129108	7:100163946-100247562	0	0.119261	-12.1887	0.00350733	0.142946
TCONS_00126249	LINC2397	XLOC_084809	XLOC_084809	20:49671114-49687954	0.136387	0	9.99306	0.00351079	0.142966
TCONS_00138628	ENSRNOG00000042407-AS1	XLOC_093102	XLOC_093102	3:2907730-2921285	0	0.0373487	-7.90171	0.00354119	0.143574
TCONS_00230046	ENSRNOG00000002428-AS1	XLOC_155591	XLOC_155591	X:78029106-78044191	0.159569	0	10.1705	0.00356703	0.14416
TCONS_00132565	LINC2496	XLOC_088923	XLOC_088923	3:65597093-65657942	0	0.17106	-12.2456	0.00358472	0.144335
TCONS_00062950	ENSRNOG00000002180-AS1	XLOC_040201	XLOC_040201	14:45581602-45627897	0	0.221484	-12.1851	0.00360766	0.145071
TCONS_00058915	LINC1090	XLOC_037417	XLOC_037417	13:73461775-73465694	0	0.14231	-8.05265	0.00363833	0.146182
ENSRNOT00000084160	AABR07062775.1-201	ENSRNOG00000054672	AABR07062775.1	6:7394805-7416311	0	0.101081	-9.99303	0.00365523	0.146495
TCONS_00056120	LINC1036	XLOC_035353	XLOC_035353	13:95569431-95578471	0	0.231642	-9.92135	0.00378407	0.150324
TCONS_00164794	Tut4-OT2	ENSRNOG00000052062	Tut4	5:128023247-128098648	0	0.132228	-12.1828	0.00379135	0.150324
TCONS_00086963	ENSRNOG00000054964-AS1	XLOC_057095	XLOC_057095	17:45945380-46013549	0	0.145464	-12.1753	0.00381041	0.150956
ENSRNOT00000078455	AABR07010868.1-201	ENSRNOG00000052016	AABR07010868.1	2:154030237-154033351	0	0.148714	-7.77251	0.00385033	0.152162
TCONS_00175425	LINC3185	XLOC_118074	XLOC_118074	6:9196626-9218171	0.105105	0	10.0836	0.00387293	0.152568
TCONS_00097159	ENSRNOG00000029466-AS1	XLOC_064404	XLOC_064404	18:17442668-17502166	0.174684	0	12.1752	0.00390697	0.153269
TCONS_00167959	LINC3081	XLOC_112988	XLOC_112988	5:3032808-3034612	0	0.235454	-7.65338	0.00391975	0.153484
TCONS_00183811	LINC3372	XLOC_124157	XLOC_124157	6:61045932-61070900	0	0.0949523	-10.1149	0.00392398	0.153484
TCONS_00060387	ENSRNOG00000003263-AS1	XLOC_038396	XLOC_038396	13:99215585-99218351	0.177353	0	7.80938	0.00395412	0.154239
TCONS_00154006	Etfbkmt-OT3	ENSRNOG00000036918	Etfbkmt	4:183656013-183702283	0.180014	0.00544967	4.91448	0.00396981	0.154476
TCONS_00230412	LINC4275	XLOC_155865	XLOC_155865	X:107664715-107689057	0	0.140457	-10.642	0.00401223	0.155374
TCONS_00160932	Amn1-OT9	ENSRNOG00000036917	Amn1	4:183677147-183698018	0	0.112767	-10.1133	0.00404638	0.156052
TCONS_00003269	Ceacam3-OT1	ENSRNOG00000027607	Ceacam3	1:79084402-79164115	0	0.114508	-12.0171	0.00409633	0.157287
TCONS_00185287	LINC3407	XLOC_125165	XLOC_125165	6:107678472-107703463	0	0.362839	-12.0074	0.00409755	0.157287
TCONS_00116393	ENSRNOG00000010589-AS1	XLOC_077992	XLOC_077992	2:78101484-78104562	0	0.341372	-8.93027	0.00412493	0.157835
TCONS_00080696	LINC1483	XLOC_052835	XLOC_052835	16:75387297-75389912	0	0.735094	-9.81612	0.0041315	0.157961
TCONS_00054615	LINC1003	XLOC_034375	XLOC_034375	13:61734787-61835005	0.0990363	0	12.1088	0.0041502	0.15855
TCONS_00054727	ENSRNOG00000028236-AS1	XLOC_034454	XLOC_034454	13:69235609-69306531	0	0.124464	-11.9686	0.00423381	0.160851
TCONS_00213430	LINC3947	XLOC_143968	XLOC_143968	9:13768082-13778472	0	0.187173	-9.81554	0.00428465	0.162399
TCONS_00139729	ENSRNOG00000057548-AS1	XLOC_093699	XLOC_093699	3:20579084-20641803	0	0.138937	-11.9504	0.00429851	0.162636
TCONS_00213573	ENSRNOG00000022598-AS1	XLOC_144046	XLOC_144046	9:15700068-15878067	0	0.0485153	-11.9371	0.0043416	0.1634
TCONS_00068230	LINC1266	XLOC_044041	XLOC_044041	14:78506789-78508496	0	0.244473	-7.61454	0.00437158	0.163924
TCONS_00136115	LINC2555	XLOC_091420	XLOC_091420	3:147281712-147284193	0.182678	0	7.7316	0.00440433	0.164801
TCONS_00059010	LINC1091	XLOC_037471	XLOC_037471	13:74684833-74714842	0.312796	0	12.0117	0.00440801	0.164801
TCONS_00185567	LINC3411	XLOC_125360	XLOC_125360	6:114383961-114451808	0.138752	0	12.0154	0.00440961	0.164801
TCONS_00113801	LINC2148	XLOC_076141	XLOC_076141	2:251145619-251153431	0.250215	0	9.76299	0.00443165	0.16524
TCONS_00038050	Wfikkn2-OT1	ENSRNOG00000002831	Wfikkn2	10:81909285-81989708	0.104653	0	11.998	0.00444685	0.165679
ENSRNOT00000071313	AABR07065818.1-201	ENSRNOG00000055835	AABR07065818.1	6:142756839-142757384	0	0.861142	-7.80082	0.00451968	0.167602
TCONS_00142158	ENSRNOG00000007446-AS1	XLOC_095343	XLOC_095343	3:92969203-92980487	0.168147	0	9.82208	0.00452281	0.167602
TCONS_00168079	LINC3083	XLOC_113105	XLOC_113105	5:4552601-4571214	0.0106477	0.432671	-5.29419	0.00461122	0.1692
TCONS_00078405	LINC1429	XLOC_051263	XLOC_051263	16:8911225-8922849	0	0.15507	-9.72744	0.00462228	0.169288
TCONS_00060943	ENSRNOG00000031098-AS1	XLOC_038817	XLOC_038817	13:110325372-110398441	0	0.111283	-11.8502	0.00466446	0.170619
ENSRNOT00000082386	AABR07004868.2-201	ENSRNOG00000057308	AABR07004868.2	1:163459074-163461083	0	0.200618	-7.57357	0.00469597	0.171235
ENSRNOT00000078509	AABR07056680.1-201	ENSRNOG00000054516	AABR07056680.1	7:35634404-35739419	0.0833547	0	11.9277	0.00469843	0.171235
TCONS_00130722	LINC2461	XLOC_087527	XLOC_087527	3:16979646-16981454	0	0.522552	-8.77729	0.00469907	0.171235
TCONS_00027983	ENSRNOG00000021370-AS1	XLOC_017735	XLOC_017735	10:40414156-40419157	0	0.0807903	-7.61417	0.00471244	0.171331
TCONS_00158851	LINC2934	XLOC_106932	XLOC_106932	4:139633724-139670023	0	0.222009	-11.8381	0.00471261	0.171331
TCONS_00029547	ENSRNOG00000003476-AS1	XLOC_018645	XLOC_018645	10:63174453-63186454	0.161457	0	9.74416	0.00471659	0.171331
TCONS_00137805	LINC2587	XLOC_092582	XLOC_092582	3:171727542-171743602	0.000353	0.181678	-8.55217	0.00473856	0.171636
TCONS_00157366	LINC2906	XLOC_105898	XLOC_105898	4:98547146-98556219	0	0.207325	-9.75192	0.00474372	0.171675
TCONS_00141902	LINC2642	XLOC_095139	XLOC_095139	3:81445673-81447890	0	0.216124	-7.82791	0.00474676	0.171675
TCONS_00150603	LINC2807	XLOC_101197	XLOC_101197	4:102575613-102592122	0	0.138432	-10.0243	0.00477077	0.172343
TCONS_00153407	H2aj-OT3	ENSRNOG00000033045	H2aj	4:170763482-170801008	4.77498	0.197971	4.59052	0.00477598	0.172343
TCONS_00089443	ENSRNOG00000011423-AS1	XLOC_058971	XLOC_058971	17:8775080-8898289	0	0.065116	-11.8701	0.00479685	0.172967
TCONS_00114564	Atp6ap1l-OT3	ENSRNOG00000040201	Atp6ap1l	2:19798798-19818699	0.00122033	0.165747	-6.76791	0.00491907	0.176187
TCONS_00202586	Il18-OT1	ENSRNOG00000009848	Il18	8:54988056-55010062	0.38087	0	11.8485	0.00501427	0.178009
TCONS_00122035	LINC2338	XLOC_082066	XLOC_082066	2:232253012-232271441	0.09397	0	9.63604	0.005113	0.180554
TCONS_00154022	LINC2856	XLOC_103477	XLOC_103477	4:183758655-183762650	0	0.136206	-8.02448	0.00511482	0.180554
TCONS_00046699	LINC849	XLOC_029662	XLOC_029662	11:79986691-79997056	0.196167	0	9.81241	0.0051279	0.180554
TCONS_00192773	ENSRNOG00000015741-AS1	XLOC_130232	XLOC_130232	7:132577710-132623145	0	0.154311	-11.6802	0.00513403	0.180554
TCONS_00150583	LINC2804	XLOC_101181	XLOC_101181	4:102174910-102180195	0	0.30395	-9.5362	0.00514973	0.180709
TCONS_00187106	LINC3450	XLOC_126332	XLOC_126332	7:1013058-1020313	0.249567	0	9.64687	0.00517409	0.180883
TCONS_00065513	LINC1205	XLOC_042087	XLOC_042087	14:109430626-109434029	0	0.180633	-8.17205	0.00522804	0.181764
TCONS_00071166	LINC1320	XLOC_046057	XLOC_046057	15:30272133-30276075	0	0.40523	-9.52784	0.00522865	0.181764
ENSRNOT00000091032	AABR07026989.1-201	ENSRNOG00000057239	AABR07026989.1	17:8694250-8773533	0	0.02	-9.52274	0.00525969	0.182288
TCONS_00013683	LINC218	XLOC_008681	XLOC_008681	1:16287596-16358381	0.110952	0	11.7714	0.00533402	0.184101
TCONS_00126276	LINC2400	XLOC_084835	XLOC_084835	20:50076823-50082809	0.00152167	0.421191	-7.54033	0.00533495	0.184101
TCONS_00190873	LINC3529	XLOC_129048	XLOC_129048	7:99483100-99484824	0	0.204528	-7.40217	0.00547664	0.187381
TCONS_00205454	LINC3787	XLOC_138776	XLOC_138776	8:116119646-116133091	0.256589	0.001791	6.8442	0.00551236	0.188469
TCONS_00116607	LINC2221	XLOC_078169	XLOC_078169	2:85049636-85115892	0.113797	0	11.7127	0.00554755	0.189135
TCONS_00065974	LINC1213	XLOC_042412	XLOC_042412	14:5144434-5152070	0.208251	0	9.52372	0.0055731	0.189825
TCONS_00003106	Pla2g4c-OT1	ENSRNOG00000026764	Pla2g4c	1:75572238-75620911	0	0.013775	-8.27973	0.00558559	0.190029
TCONS_00031810	ENSRNOG00000013659-AS1	XLOC_019963	XLOC_019963	10:94760008-94809743	0	0.137581	-11.6407	0.00567883	0.19225
TCONS_00161084	AABR07046707.1-OT2	ENSRNOG00000042458	AABR07046707.1	5:2307541-2327437	0.0779327	0	9.50671	0.00572346	0.193625
TCONS_00017024	AABR07002896.1-OT1	ENSRNOG00000047627	AABR07002896.1	1:88522570-88583015	0	0.104675	-11.532	0.0057746	0.194672
TCONS_00001874	ENSRNOG00000017412-AS1	XLOC_001352	XLOC_001352	1:48564869-48565671	0	0.442113	-7.41354	0.0057903	0.194825
TCONS_00109377	LINC2052	XLOC_073137	XLOC_073137	2:124760737-124807690	0.140333	0	11.6448	0.0057913	0.194825
TCONS_00182857	LINC3346	XLOC_123414	XLOC_123414	6:33683702-33684642	0.343477	0	7.25689	0.00580269	0.195073
TCONS_00046706	LINC851	XLOC_029668	XLOC_029668	11:80022097-80028841	0	0.273121	-9.71413	0.00583368	0.195432
TCONS_00107308	LINC2007	XLOC_071616	XLOC_071616	2:43202369-43250473	0.1363	0	11.6379	0.00584221	0.195582
TCONS_00073136	LINC1351	XLOC_047469	XLOC_047469	15:82842066-82907197	0	0.101504	-11.5904	0.00591579	0.19725
TCONS_00217395	LINC4015	XLOC_146547	XLOC_146547	9:110476820-110485836	0.216177	0	9.76196	0.00591661	0.19725
TCONS_00114062	LINC2153	XLOC_076309	XLOC_076309	2:259248882-259250457	0	0.251591	-7.54876	0.00592747	0.197476
TCONS_00182580	LINC3332	XLOC_123214	XLOC_123214	6:27643311-27656315	0	0.119005	-9.50495	0.00593993	0.197717
ENSRNOT00000086776	AABR07065889.2-201	ENSRNOG00000058118	AABR07065889.2	6:143749414-143757128	0	0.207158	-9.54056	0.00594292	0.197717
TCONS_00198978	AABR07058519.1-OT1	ENSRNOG00000032777	AABR07058519.1	7:121930628-122003930	0.0882277	0	11.618	0.00595983	0.198143
TCONS_00017244	LINC287	XLOC_010978	XLOC_010978	1:90465521-90480612	0.100576	0	9.45465	0.00596915	0.198231
TCONS_00101225	LINC1888	XLOC_067339	XLOC_067339	19:34758747-34826321	0.0222817	0	9.45325	0.00597999	0.198364
TCONS_00122167	ENSRNOG00000010121-AS1	XLOC_082176	XLOC_082176	2:236195082-236243526	0	0.126886	-11.4469	0.00633694	0.206826
TCONS_00113144	LINC2135	XLOC_075637	XLOC_075637	2:231710546-231734232	0.00256967	0.16622	-5.93112	0.00637751	0.207564
ENSRNOT00000080850	AABR07008142.2-201	ENSRNOG00000052560	AABR07008142.2	2:45616187-45619717	0	0.0962923	-7.35556	0.00638108	0.207564
TCONS_00002663	LINC66	XLOC_001805	XLOC_001805	1:64720002-64727560	0.0451143	0	7.33099	0.00639236	0.207791
TCONS_00093617	LINC1759	XLOC_061967	XLOC_061967	18:6643932-6662802	0	0.0775923	-9.40043	0.00644577	0.208814
TCONS_00073248	LINC1352	XLOC_047552	XLOC_047552	15:85876945-85884265	0	0.248812	-9.69986	0.0064516	0.208814
TCONS_00212242	LINC3901	XLOC_143223	XLOC_143223	8:121831787-121889067	0.113252	0	11.4958	0.00651998	0.210237
TCONS_00230410	LINC4273	XLOC_155865	XLOC_155865	X:107664715-107688873	0	0.236337	-11.385	0.00652792	0.210352
TCONS_00116263	LINC2204	XLOC_077883	XLOC_077883	2:61969101-61978520	0.162491	0	9.40414	0.0065371	0.210498
TCONS_00206717	LINC3814	XLOC_139493	XLOC_139493	8:5901474-5910892	0	0.149408	-9.34511	0.00659629	0.211564
TCONS_00212568	LINC3913	XLOC_143480	XLOC_143480	8:129500205-129508520	0.0870967	0	8.4072	0.00669453	0.213578
TCONS_00190978	LINC3534	XLOC_129145	XLOC_129145	7:101563944-101621253	0.111088	0	11.4518	0.0067657	0.21542
ENSRNOT00000085953	AABR07002928.1-201	ENSRNOG00000061315	AABR07002928.1	1:89649636-89682737	4.76667e-05	0.0850923	-8.4851	0.00681968	0.215997
TCONS_00087056	AABR07027902.1-OT2	ENSRNOG00000050847	AABR07027902.1	17:48371425-48455623	0	0.0675663	-11.3358	0.00688458	0.217164
TCONS_00201010	Ubl5-OT4	ENSRNOG00000020442	Ubl5	8:21656677-21665038	0	0.219894	-9.71242	0.0069441	0.218218
TCONS_00098199	LINC1836	XLOC_065193	XLOC_065193	18:43957082-43963501	0.0123377	0.497806	-5.28618	0.00694417	0.218218
TCONS_00218314	LINC4035	XLOC_147159	XLOC_147159	9:12954048-12956259	0	0.150348	-7.32706	0.00697525	0.218909
TCONS_00093532	ENSRNOG00000054058-AS1	XLOC_061899	XLOC_061899	18:4226169-4230556	0	0.288355	-9.19482	0.00705485	0.220436
TCONS_00077629	LINC1421	XLOC_050763	XLOC_050763	15:105969241-105982709	0.113007	0	9.52596	0.0071244	0.222143
TCONS_00099258	ENSRNOG00000024426-AS1	XLOC_065978	XLOC_065978	18:69834129-69841083	0	0.191446	-9.27265	0.0071451	0.222644
TCONS_00220485	LINC4087	XLOC_148574	XLOC_148574	9:70835004-70894320	0.0915303	0	11.3663	0.00722093	0.224571
TCONS_00039633	LINC691	XLOC_024848	XLOC_024848	10:101258399-101273100	0.0946417	0	9.37748	0.00727437	0.225506
TCONS_00134959	LINC2540	XLOC_090480	XLOC_090480	3:122828056-122829507	0.217321	0	7.18551	0.00732463	0.226918
TCONS_00140500	LINC2626	XLOC_094210	XLOC_094210	3:47322882-47408145	0	0.0628673	-11.2506	0.00735656	0.227614
TCONS_00041667	Kcnj15-OT1	ENSRNOG00000001656	Kcnj15	11:35526635-35569199	0	0.125416	-11.2824	0.00740904	0.22865
TCONS_00089972	ENSRNOG00000016779-AS1	XLOC_059282	XLOC_059282	17:16051386-16133955	0.0693937	0	11.3002	0.00753094	0.230933
TCONS_00000279	LINC13	XLOC_000183	XLOC_000183	1:8126720-8181897	0	0.0896667	-11.1787	0.0075517	0.231128
TCONS_00013699	Myb-OT1	ENSRNOG00000055858	Myb	1:16617961-16664696	0.273375	1.9823	-2.91548	0.00770045	0.234193
TCONS_00080534	Plekha2-OT1	ENSRNOG00000038365	Plekha2	16:71707943-71746642	0.228976	1.56834	-2.79865	0.00770694	0.234242
TCONS_00036631	ENSRNOG00000007725-AS1	XLOC_022982	XLOC_022982	10:57653593-57662930	0	0.126313	-9.08923	0.00783467	0.236632
TCONS_00083546	Trmt9b-OT1	ENSRNOG00000011253	Trmt9b	16:59331872-59366824	0.036305	0	9.13687	0.00802373	0.240935
TCONS_00227423	LINC4220	XLOC_153755	XLOC_153755	X:140789137-140836600	0	0.102679	-11.1135	0.00805141	0.241212
TCONS_00214665	ENSRNOG00000058243-AS1	XLOC_144767	XLOC_144767	9:46471074-46483676	0	0.11873	-9.45857	0.00806618	0.241359
TCONS_00214397	Prss39-OT1	ENSRNOG00000023858	Prss39	9:41010920-41012731	0.165695	0	7.13241	0.00811528	0.242222
ENSRNOT00000089862	AABR07035780.3-203	ENSRNOG00000058398	AABR07035780.3	12:22359794-22361493	0	0.158385	-7.00445	0.00813423	0.242637
ENSRNOT00000092960	AABR07058158.1-210	ENSRNOG00000062170	AABR07058158.1	7:102723466-102862260	0.0347253	0	11.1936	0.0082074	0.243653
TCONS_00046563	LINC839	XLOC_029568	XLOC_029568	11:74137517-74139568	0	0.134398	-7.03688	0.00841461	0.24869
ENSRNOT00000084239	AABR07015812.2-201	ENSRNOG00000054484	AABR07015812.2	14:78393083-78398305	0	0.206395	-8.97004	0.00843722	0.249198
TCONS_00019042	LINC332	XLOC_012248	XLOC_012248	1:140638722-140686927	0.10673	0	11.1443	0.00844214	0.249198
ENSRNOT00000080918	LOC102546889-201	ENSRNOG00000059087	LOC102546889	8:124166520-124169312	0.421617	0	9.02991	0.0085752	0.251431
TCONS_00047561	AABR07034980.1-OT1	ENSRNOG00000052420	AABR07034980.1	12:2606595-2626314	0.230687	0	11.1107	0.00864519	0.252963
TCONS_00189245	AABR07057170.1-OT1	ENSRNOG00000057981	AABR07057170.1	7:58570481-58572349	0	0.158529	-7.15134	0.00864845	0.252963
TCONS_00149384	LINC2787	XLOC_100305	XLOC_100305	4:77401334-77406943	0.239567	0	9.22746	0.00866247	0.253066
TCONS_00060556	LINC1117	XLOC_038508	XLOC_038508	13:101786167-101789126	0.18431	0	7.94944	0.00870476	0.253993
TCONS_00162627	Hrct1-OT1	ENSRNOG00000039336	Hrct1	5:59226897-59228914	0	0.549535	-9.02623	0.00879992	0.255686
ENSRNOT00000092120	AABR07050484.1-201	ENSRNOG00000061404	AABR07050484.1	5:166894481-166901114	0	0.0417847	-7.0562	0.00883132	0.256135
TCONS_00072057	ENSRNOG00000010798-AS1	XLOC_046611	XLOC_046611	15:46591796-46593582	0	0.595608	-8.96399	0.00887642	0.257133
TCONS_00093608	LINC1758	XLOC_061958	XLOC_061958	18:6627681-6629189	0	0.176802	-6.99916	0.00891144	0.257838
TCONS_00147716	LINC2765	XLOC_099046	XLOC_099046	4:32046463-32053905	0.150915	0	8.9694	0.00897243	0.258706
TCONS_00112359	LINC2113	XLOC_075097	XLOC_075097	2:207176573-207192035	0.00712233	0.309029	-5.32196	0.00897591	0.258706
TCONS_00209321	Senp8-OT1	ENSRNOG00000011595	Senp8	8:64543016-64572892	0.159865	0	11.0549	0.0089949	0.258868
TCONS_00152373	ENSRNOG00000014578-AS2	XLOC_102400	XLOC_102400	4:149982521-149991141	0	0.0764393	-8.30178	0.00906864	0.260353
TCONS_00088560	LINC1621	XLOC_058315	XLOC_058315	17:85763681-85776576	0.093229	0	9.06771	0.00912875	0.261767
ENSRNOT00000084744	AABR07040906.1-202	ENSRNOG00000053818	AABR07040906.1	X:113550392-113582564	0.0434027	0	9.29588	0.00915484	0.262259
TCONS_00093371	LINC1754	XLOC_061779	XLOC_061779	18:414392-417707	0	0.313769	-8.93147	0.00916769	0.262259
TCONS_00214615	ENSRNOG00000018623-AS1	XLOC_144730	XLOC_144730	9:44755564-44785525	0	0.146554	-11.0014	0.00919576	0.262667
TCONS_00030876	ENSRNOG00000010492-AS3	XLOC_019435	XLOC_019435	10:84881572-84903857	0	0.185617	-10.9203	0.00919937	0.262667
ENSRNOT00000080510	AABR07051555.1-201	ENSRNOG00000056393	AABR07051555.1	3:16955665-16956846	0.228628	4.66306	-4.35398	0.00921617	0.262667
TCONS_00070145	LINC1302	XLOC_045258	XLOC_045258	15:10498310-10504987	0	0.163109	-8.99934	0.00923021	0.262799
ENSRNOT00000079226	AABR07032496.1-201	ENSRNOG00000057780	AABR07032496.1	18:68551888-68681685	0	0.0335727	-10.9906	0.00924382	0.263005
TCONS_00009938	LINC162	XLOC_006179	XLOC_006179	1:221196741-221210057	0	0.324419	-10.9395	0.00925382	0.263005
TCONS_00187433	LINC3460	XLOC_126526	XLOC_126526	7:10700114-10741254	0.11477	0	11.0204	0.00927921	0.263041
ENSRNOT00000089026	AABR07035780.1-201	ENSRNOG00000056032	AABR07035780.1	12:22373883-22379737	0.0151273	0.535236	-5.08435	0.0092824	0.263041
TCONS_00058990	Ralgps2-OT2	ENSRNOG00000004736	Ralgps2	13:74412192-74468465	0.161893	1.07211	-2.74867	0.00938404	0.264582
TCONS_00055776	LINC1027	XLOC_035110	XLOC_035110	13:90041249-90048342	0.0704383	0	7.83488	0.00945379	0.26523
TCONS_00114314	ENSRNOG00000048643-AS1	XLOC_076473	XLOC_076473	2:4829366-4868322	0	0.10904	-10.9146	0.00945872	0.26523
ENSRNOT00000092920	AABR07058158.1-202	ENSRNOG00000062170	AABR07058158.1	7:102650110-102791009	0.000135667	0.135865	-9.63065	0.00947346	0.265395
TCONS_00003576	ENSRNOG00000055650-AS1	XLOC_002294	XLOC_002294	1:82003787-82027042	0.0439667	0.975118	-4.52675	0.00948525	0.265395
TCONS_00222101	LOC100362040-OT1	ENSRNOG00000030738	LOC100362040	9:100624851-100658035	0	0.127337	-10.9063	0.00955239	0.266769
TCONS_00107105	LINC2000	XLOC_071438	XLOC_071438	2:38300134-38316422	0.0670267	0	8.95448	0.00955837	0.266782
TCONS_00188794	LINC3495	XLOC_127395	XLOC_127395	7:41511453-41512886	0	0.191801	-7.06379	0.00962743	0.267875
ENSRNOT00000092897	AABR07031405.1-201	ENSRNOG00000062080	AABR07031405.1	18:12651445-12672820	0	0.0470263	-8.85831	0.00966755	0.268429
TCONS_00200164	Smagp-OT4	ENSRNOG00000048932	Smagp	7:142237212-142261016	0.172269	0	10.9608	0.00970146	0.269216
TCONS_00048026	LINC888	XLOC_030457	XLOC_030457	12:12826765-12837762	0	0.0959767	-8.923	0.00975817	0.270478
TCONS_00020068	Rnf121-OT2	ENSRNOG00000020175	Rnf121	1:167159147-167169485	0	0.096157	-8.85411	0.00984305	0.2725
TCONS_00059538	ENSRNOG00000003816-AS1	XLOC_037825	XLOC_037825	13:84588527-84590117	0.180668	0	7.12222	0.00985024	0.2725
TCONS_00000506	LINC22	XLOC_000346	XLOC_000346	1:14035257-14075233	0	0.0973487	-10.8323	0.00988184	0.27265
TCONS_00183156	LINC3357	XLOC_123615	XLOC_123615	6:43734852-43738917	0.255485	0	8.85255	0.0100599	0.274879
TCONS_00203028	LINC3751	XLOC_137129	XLOC_137129	8:62436111-62441118	0	0.188553	-8.79021	0.0100723	0.274879
TCONS_00198371	Ly6i-OT1	ENSRNOG00000007137	Ly6i	7:116362434-116474559	0.035425	0	10.9155	0.0101285	0.275979
TCONS_00031136	LINC529	XLOC_019590	XLOC_019590	10:87080970-87091378	0.006753	0.239322	-5.14554	0.0101529	0.276178
TCONS_00058006	Mfsd4a-OT4	ENSRNOG00000024657	Mfsd4a	13:48790777-48813228	0.001272	0.231963	-7.13224	0.0101535	0.276178
TCONS_00032407	Cd300c2-OT1	ENSRNOG00000046216	Cd300c2	10:104997000-105000557	0	0.279206	-8.84379	0.0101587	0.276178
TCONS_00036397	LINC620	XLOC_022864	XLOC_022864	10:56008898-56015027	0.63963	0	10.8962	0.0102671	0.27787
TCONS_00035244	Sec24a-OT3	ENSRNOG00000004563	Sec24a	10:37214263-37228377	0.300894	0	10.8846	0.0103678	0.279808
ENSRNOT00000092503	AA926063-203	ENSRNOG00000000478	AA926063	20:5490521-5499010	0.110691	0	8.78087	0.010461	0.282009
TCONS_00027543	Tpcr12-OT1	ENSRNOG00000048210	Tpcr12	10:34396979-34422979	0	0.141622	-10.7525	0.0104894	0.282457
TCONS_00132461	ENSRNOG00000052519-AS1	XLOC_088857	XLOC_088857	3:62803036-62810059	0	0.126551	-8.69236	0.0105046	0.282708
TCONS_00041831	LINC740	XLOC_026303	XLOC_026303	11:38844262-38865802	0.196247	0	10.8623	0.0105612	0.283439
TCONS_00157877	Pradc1-OT2	ENSRNOG00000050483	Pradc1	4:117230528-117252457	0	0.175325	-10.772	0.0106042	0.283936
TCONS_00069091	Plek-OT2	ENSRNOG00000005214	Plek	14:100217362-100259417	0.0908327	0	10.8588	0.0106126	0.283936
TCONS_00113850	LINC2151	XLOC_076173	XLOC_076173	2:251900948-251904784	0	0.234277	-8.73254	0.0106266	0.283936
TCONS_00022217	LINC386	XLOC_014213	XLOC_014213	1:211609047-211618670	0.098571	0	8.76861	0.0106268	0.283936
ENSRNOT00000084448	LOC102547734-201	ENSRNOG00000056918	LOC102547734	15:42194420-42208522	0.00720867	0.389138	-5.72338	0.0106683	0.284409
TCONS_00118387	ENSRNOG00000011133-AS1	XLOC_079642	XLOC_079642	2:143433326-143475349	0	0.0908313	-10.7604	0.010674	0.284409
TCONS_00058007	Mfsd4a-OT3	ENSRNOG00000024657	Mfsd4a	13:48790777-48813228	0.183018	0	10.8376	0.0108122	0.287453
ENSRNOT00000089733	AC141344.1-201	ENSRNOG00000054578	AC141344.1	5:154428674-154431444	0	0.0831987	-6.81681	0.0108894	0.288754
TCONS_00150838	LINC2810	XLOC_101338	XLOC_101338	4:115976184-116016206	0.0927347	0	10.8183	0.0109271	0.289277
TCONS_00195584	LINC3625	XLOC_132001	XLOC_132001	7:39835811-39866236	0.134536	0	10.8162	0.0109483	0.289475
ENSRNOT00000086938	AC105604.2-201	ENSRNOG00000061285	AC105604.2	18:52593675-52600085	0.157039	0	8.9308	0.0109846	0.290277
TCONS_00064166	LINC1187	XLOC_041203	XLOC_041203	14:78403718-78410866	0	0.130743	-8.75411	0.0110171	0.290662
ENSRNOT00000088976	AABR07056464.1-202	ENSRNOG00000060280	AABR07056464.1	7:26145625-26146763	0	0.802437	-8.71745	0.0110531	0.290811
TCONS_00040280	LINC705	XLOC_025260	XLOC_025260	10:107705863-107850764	0	0.0254987	-10.7131	0.0110927	0.291374
TCONS_00034615	LINC596	XLOC_021711	XLOC_021711	10:29893653-29898534	0.191245	0	8.7032	0.01112	0.291933
ENSRNOT00000079007	AC111678.1-201	ENSRNOG00000055327	AC111678.1	18:52053174-52125567	0.055308	0	10.7998	0.0111612	0.292695
ENSRNOT00000082574	AABR07027431.1-201	ENSRNOG00000061171	AABR07027431.1	17:30816986-30830319	0.0716307	0	8.73524	0.0113167	0.295485
TCONS_00221343	LINC4093	XLOC_149172	XLOC_149172	9:87458892-87487948	0.123682	0	10.7704	0.0113726	0.296624
ENSRNOT00000081928	AABR07030566.2-201	ENSRNOG00000053962	AABR07030566.2	10:93170835-93183050	0	0.077454	-8.76501	0.0113837	0.296753
TCONS_00200769	LINC3725	XLOC_135615	XLOC_135615	8:12581092-12610012	0	0.123352	-10.6642	0.0113971	0.296941
ENSRNOT00000085360	AABR07029470.1-201	ENSRNOG00000057519	AABR07029470.1	10:29635447-29773213	0	0.025786	-10.6568	0.0115038	0.298913
TCONS_00031664	LINC533	XLOC_019885	XLOC_019885	10:92929329-92934567	0	0.172762	-8.70271	0.0116037	0.300859
ENSRNOT00000090651	AABR07060133.1-201	ENSRNOG00000054990	AABR07060133.1	4:58408730-58485447	0.049548	0	10.7255	0.0117554	0.303976
TCONS_00219491	LINC4067	XLOC_147876	XLOC_147876	9:45295879-45297332	0.009648	0.704593	-5.73485	0.0119673	0.30808
TCONS_00044591	Scaf4-OT2	ENSRNOG00000002104	Scaf4	11:30410203-30420983	0	0.313322	-10.585	0.011972	0.30808
TCONS_00098461	ENSRNOG00000038957-AS1	XLOC_065403	XLOC_065403	18:55640074-55680268	0.0848657	0	10.6964	0.0119842	0.30808
TCONS_00208783	LINC3839	XLOC_140908	XLOC_140908	8:55546939-55552584	0	0.16264	-8.72477	0.0120277	0.308695
TCONS_00058229	Ndufv3-OT4	ENSRNOG00000027593	Ndufv3	13:51272996-51315311	0	0.0811833	-10.6466	0.012074	0.309555
TCONS_00117060	LINC2228	XLOC_078524	XLOC_078524	2:109335496-109363305	0	0.123015	-10.6411	0.0120967	0.309971
TCONS_00156539	LINC2889	XLOC_105316	XLOC_105316	4:72708577-72712468	0.0687683	0	6.96732	0.0123122	0.313052
ENSRNOT00000078417	AABR07059024.1-201	ENSRNOG00000057275	AABR07059024.1	4:1983322-2053628	0.0471367	0	10.6534	0.0123189	0.313052
TCONS_00020877	LINC366	XLOC_013421	XLOC_013421	1:190523230-190555080	0.102951	0	10.6395	0.0124163	0.314813
TCONS_00221384	LINC4094	XLOC_149195	XLOC_149195	9:87729425-87753526	0.150109	0	10.6373	0.0124243	0.314849
TCONS_00008889	LINC145	XLOC_005565	XLOC_005565	1:210216482-210267478	0	0.06363	-10.5261	0.0124571	0.314887
TCONS_00037781	Gdpd1-OT1	ENSRNOG00000060561	Gdpd1	10:74364441-74376393	0.07703	0	8.67909	0.0124658	0.314887
TCONS_00170092	Ptpn3-OT1	ENSRNOG00000011425	Ptpn3	5:74232300-74264092	0.112194	0	10.6329	0.0124658	0.314887
TCONS_00046135	ENSRNOG00000002240-AS1	XLOC_029283	XLOC_029283	11:68215739-68220527	0	0.162465	-8.5229	0.0125856	0.316276
TCONS_00047679	LINC879	XLOC_030270	XLOC_030270	12:6577012-6578288	0.201408	0	6.95023	0.012606	0.316457
TCONS_00153295	LINC2846	XLOC_102970	XLOC_102970	4:168551446-168572529	0.151674	0	10.6019	0.0126424	0.316474
TCONS_00002660	LINC63	XLOC_001805	XLOC_001805	1:64719998-64727560	0.0330087	0	6.87107	0.012648	0.316474
TCONS_00113384	Tbck-OT1	ENSRNOG00000011454	Tbck	2:237751654-237761000	0.027381	1.24795	-5.42497	0.0127302	0.317918
TCONS_00110285	LINC2073	XLOC_073852	XLOC_073852	2:161655432-161661393	0	0.157178	-8.77052	0.012882	0.321027
ENSRNOT00000080884	AABR07011682.1-201	ENSRNOG00000058126	AABR07011682.1	2:165917470-165931558	0	0.223733	-10.4844	0.012888	0.321027
TCONS_00203777	LOC103693129-OT2	ENSRNOG00000049584	LOC103693129	8:74868676-74940886	0.047191	0	10.5503	0.0130938	0.324643
TCONS_00040329	LINC706	XLOC_025309	XLOC_025309	10:108248445-108249222	0.29813	0	6.82007	0.0131074	0.324702
TCONS_00156140	ENSRNOG00000046109-AS1	XLOC_105063	XLOC_105063	4:62777615-62790381	0.265503	0	10.5426	0.0131362	0.324948
TCONS_00091166	Cmahp-OT1	ENSRNOG00000003094	Cmahp	17:42595251-42613273	0.0401807	0.519154	-3.7006	0.0131632	0.325188
TCONS_00049267	Mphosph9-OT3	ENSRNOG00000001074	Mphosph9	12:37705404-37770193	0.052166	0	10.54	0.0131761	0.325188
TCONS_00065527	LINC1206	XLOC_042101	XLOC_042101	14:109449449-109454349	0	0.176894	-8.6436	0.0131817	0.325188
TCONS_00000445	LINC21	XLOC_000303	XLOC_000303	1:12586131-12605827	0	0.0416383	-8.56238	0.0131833	0.325188
TCONS_00116872	LINC2225	XLOC_078378	XLOC_078378	2:97675192-97683890	0.0931013	0	8.53963	0.0133089	0.32795
TCONS_00042190	LINC749	XLOC_026560	XLOC_026560	11:53611271-53614681	0.00482567	0.358005	-5.64833	0.0134201	0.330183
TCONS_00133807	LINC2514	XLOC_089783	XLOC_089783	3:105167673-105176585	0.368293	0	10.4982	0.0135707	0.3327
TCONS_00219397	LINC4065	XLOC_147836	XLOC_147836	9:44187306-44191870	0	0.167674	-8.45925	0.0135855	0.332892
TCONS_00089513	LINC1663	XLOC_059023	XLOC_059023	17:9245845-9247096	0	0.149722	-6.55261	0.0137289	0.335383
TCONS_00049802	Ccdc60-OT1	ENSRNOG00000032684	Ccdc60	12:46042168-46128564	0.0372317	0	10.4845	0.0137512	0.335759
TCONS_00006818	LINC122	XLOC_004344	XLOC_004344	1:163743499-163761736	0	0.163723	-10.4442	0.0138119	0.336853
ENSRNOT00000089088	AABR07001452.1-201	ENSRNOG00000054504	AABR07001452.1	1:45409196-45409764	0	0.323632	-6.52981	0.013845	0.336853
ENSRNOT00000084175	AABR07054126.1-202	ENSRNOG00000054946	AABR07054126.1	3:142280345-142319383	0.081472	0	10.4685	0.0138963	0.337761
TCONS_00054244	ENSRNOG00000007418-AS1	XLOC_034110	XLOC_034110	13:52250936-52256186	0	0.126948	-8.28162	0.0141341	0.342344
ENSRNOT00000080128	LOC100363531-201	ENSRNOG00000055485	LOC100363531	X:77065461-77081039	0	0.0399857	-8.17608	0.0142784	0.344096
TCONS_00048505	LINC892	XLOC_030747	XLOC_030747	12:20334882-20341446	0	0.11097	-8.40302	0.0143	0.344443
TCONS_00153943	LINC2855	XLOC_103425	XLOC_103425	4:182336759-182350297	1.07936	0.101163	3.36974	0.0143189	0.344727
TCONS_00088401	LINC1615	XLOC_058212	XLOC_058212	17:83101114-83126507	0	0.112013	-10.3363	0.0143337	0.34491
ENSRNOT00000092127	RT1-DOb-203	ENSRNOG00000000454	RT1-DOb	20:4020380-4022945	0	0.087589	-6.7635	0.0143515	0.345114
TCONS_00116380	LINC2212	XLOC_077981	XLOC_077981	2:77809138-77828040	0.148202	0	10.4111	0.0145147	0.347281
TCONS_00020115	ENSRNOG00000018551-AS1	XLOC_012919	XLOC_012919	1:167864410-167870479	0.143548	0	8.73283	0.0145288	0.347349
TCONS_00002626	Tarm1-OT1	ENSRNOG00000055581	Tarm1	1:64248902-64254564	0.139358	0	8.48171	0.0145989	0.348247
TCONS_00069238	LINC1285	XLOC_044623	XLOC_044623	14:105145101-105164108	0	0.146976	-10.3111	0.0146138	0.348247
ENSRNOT00000092522	AC120486.10-202	ENSRNOG00000059066	AC120486.10	20:2584557-2609007	0	0.026393	-8.26207	0.0146633	0.348686
ENSRNOT00000086616	AABR07017145.2-201	ENSRNOG00000060863	AABR07017145.2	15:12756403-12796711	0	0.016679	-8.2855	0.0146644	0.348686
TCONS_00007681	LINC128	XLOC_004945	XLOC_004945	1:184798185-184810738	0	0.219048	-10.2887	0.0148611	0.3505
TCONS_00220766	LINC4088	XLOC_148813	XLOC_148813	9:76288971-76316967	0.107629	0	10.3735	0.0148848	0.350613
ENSRNOT00000083950	AABR07034636.1-201	ENSRNOG00000056037	AABR07034636.1	11:81936176-81939050	0	0.207352	-8.11915	0.0149054	0.350613
TCONS_00036333	LINC617	XLOC_022822	XLOC_022822	10:55620646-55626453	0	0.149691	-8.686	0.0149054	0.350613
TCONS_00047126	Arvcf-OT2	ENSRNOG00000001888	Arvcf	11:86764830-86793791	0	0.020211	-8.09629	0.0151363	0.353778
TCONS_00004885	ENSRNOG00000020731-AS1	XLOC_002995	XLOC_002995	1:101351828-101357125	0	0.225295	-9.12782	0.0151428	0.353778
TCONS_00156965	ENSRNOG00000008393-AS1	XLOC_105587	XLOC_105587	4:82762501-82783127	0	0.132644	-10.3194	0.0151956	0.354645
TCONS_00110381	ENSRNOG00000010768-AS5	XLOC_073916	XLOC_073916	2:165666157-165695826	0	0.021383	-8.20029	0.0152195	0.354645
TCONS_00209513	LINC3849	XLOC_141414	XLOC_141414	8:68850583-68875450	0	0.109608	-10.3125	0.0152635	0.355392
TCONS_00107898	LINC2020	XLOC_072059	XLOC_072059	2:58119641-58137550	0.0356347	0	8.16446	0.0152721	0.355418
TCONS_00093589	ENSRNOG00000016467-AS1	XLOC_061940	XLOC_061940	18:6416513-6466350	0	0.0529427	-10.2295	0.0154774	0.358811
TCONS_00230880	ENSRNOG00000007682-AS1	XLOC_156199	XLOC_156199	X:127636146-127653113	0	0.155313	-10.2261	0.015502	0.359162
TCONS_00005627	Fam169b-OT1	ENSRNOG00000022822	Fam169b	1:129254644-129258425	0.0257433	0.515789	-4.23324	0.0155179	0.359231
TCONS_00014371	LINC236	XLOC_009183	XLOC_009183	1:40266717-40272567	0.135061	0	8.47437	0.0155589	0.360007
TCONS_00166642	LINC3066	XLOC_112211	XLOC_112211	5:154418120-154418992	0	0.21827	-6.58542	0.0156474	0.36188
TCONS_00006761	LINC120	XLOC_004301	XLOC_004301	1:163437885-163443449	0	0.104998	-8.1131	0.0156706	0.362112
TCONS_00035243	Sec24a-OT2	ENSRNOG00000004563	Sec24a	10:37210834-37228380	0	0.150537	-10.2705	0.0157156	0.362761
TCONS_00208697	LINC3837	XLOC_140860	XLOC_140860	8:54792729-54819036	0.0979983	0	10.292	0.0157899	0.363645
TCONS_00088636	ENSRNOG00000040024-AS1	XLOC_058383	XLOC_058383	17:86870418-86873163	0.25852	0	8.31174	0.0157916	0.363645
TCONS_00182773	LINC3344	XLOC_123340	XLOC_123340	6:30629736-30630668	3.04958	0	10.29	0.0158357	0.364312
ENSRNOT00000085401	AABR07007799.1-201	ENSRNOG00000061406	AABR07007799.1	2:28836635-28843039	0.0982757	0	8.13942	0.0159051	0.365037
TCONS_00201717	Pus3-OT3	ENSRNOG00000012994	Pus3	8:36760958-36772304	0.0514283	0	8.09126	0.0159538	0.365805
TCONS_00067760	LINC1259	XLOC_043690	XLOC_043690	14:59940305-59964589	0	0.099723	-10.1479	0.0160816	0.36786
TCONS_00189700	LINC3510	XLOC_128177	XLOC_128177	7:63304002-63325250	0	0.118476	-10.1606	0.0163368	0.371036
TCONS_00227135	LINC4216	XLOC_153543	XLOC_153543	X:123099975-123123868	0.113797	0	10.2427	0.0163416	0.371036
TCONS_00142880	ENSRNOG00000024563-AS1	XLOC_095869	XLOC_095869	3:112219670-112229194	0.28887	0	10.2433	0.0163436	0.371036
TCONS_00005937	LINC112	XLOC_003754	XLOC_003754	1:140644966-140653071	0	0.109622	-8.67277	0.0165466	0.374408
ENSRNOT00000093119	Dnajc11-203	ENSRNOG00000008802	Dnajc11	5:169147134-169154068	0.323498	3.46636	-3.4474	0.0165636	0.374554
TCONS_00131044	LINC2469	XLOC_087762	XLOC_087762	3:25290469-25308561	0	0.135899	-10.1286	0.0166234	0.375617
TCONS_00092047	LINC1712	XLOC_060846	XLOC_060846	17:60670723-60694170	0.11477	0	10.2112	0.0167209	0.377235
TCONS_00004256	LINC77	XLOC_002620	XLOC_002620	1:89428042-89440794	0	0.0567167	-8.41003	0.0167262	0.377235
TCONS_00197510	LINC3661	XLOC_133517	XLOC_133517	7:96887894-96910953	0.105191	0	10.2037	0.0167823	0.377771
TCONS_00085453	ENSRNOG00000030027-AS3	XLOC_056069	XLOC_056069	17:15054513-15099867	0.266694	0.00940533	4.86723	0.0168718	0.378868
TCONS_00139028	LINC2595	XLOC_093295	XLOC_093295	3:8417317-8428025	0.071314	0	8.53687	0.0168774	0.378868
TCONS_00058086	ENSRNOG00000029938-AS1	XLOC_036878	XLOC_036878	13:49866888-49871302	0.155724	0	8.25946	0.0169396	0.380037
TCONS_00130892	LINC2464	XLOC_087664	XLOC_087664	3:20561884-20564761	0	0.0714667	-6.70219	0.0170477	0.380999
TCONS_00116981	ENSRNOG00000012723-AS1	XLOC_078463	XLOC_078463	2:104429306-104441350	0	0.197144	-10.0772	0.0170514	0.380999
ENSRNOT00000084603	AC133821.1-201	ENSRNOG00000055279	AC133821.1	5:154363444-154372486	0.0635627	0	8.008	0.0170981	0.381689
TCONS_00046843	ENSRNOG00000001796-AS1	XLOC_029757	XLOC_029757	11:81964979-81980814	0	0.0336737	-7.98525	0.0171434	0.382523
TCONS_00139730	ENSRNOG00000057548-AS2	XLOC_093699	XLOC_093699	3:20579084-20661411	0.0132617	0	8.9375	0.0171965	0.382997
TCONS_00033099	LINC563	XLOC_020731	XLOC_020731	10:1548204-1550470	0.094497	0	6.71595	0.0174081	0.385749
TCONS_00115865	ENSRNOG00000047990-AS1	XLOC_077588	XLOC_077588	2:45620004-45621899	0	0.267307	-7.8787	0.0174893	0.386291
TCONS_00185066	ENSRNOG00000045941-AS1	XLOC_125046	XLOC_125046	6:104435328-104438046	0	0.192018	-7.94996	0.0174943	0.386291
TCONS_00216848	ENSRNOG00000019557-AS1	XLOC_146141	XLOC_146141	9:97126592-97151837	0.102179	0	10.1517	0.0175476	0.386813
ENSRNOT00000087729	AABR07015846.1-201	ENSRNOG00000060138	AABR07015846.1	14:80605796-80625363	0	0.111405	-9.99747	0.0175905	0.386944
ENSRNOT00000081991	AABR07021590.1-201	ENSRNOG00000051371	AABR07021590.1	13:79709533-79712546	0.0547073	0	6.31426	0.0176229	0.387301
TCONS_00230538	LINC4280	XLOC_155960	XLOC_155960	X:113861731-113882378	0	0.112929	-10.0891	0.0176816	0.387847
TCONS_00221840	LINC4106	XLOC_149532	XLOC_149532	9:97530946-97538143	0.146467	0.00177833	5.80727	0.017688	0.387847
ENSRNOT00000077675	AABR07056605.1-201	ENSRNOG00000061490	AABR07056605.1	7:31988038-32049615	0.041047	0	10.121	0.0177773	0.38885
TCONS_00073022	LINC1347	XLOC_047367	XLOC_047367	15:70891054-70938563	0	0.0451213	-9.97366	0.0178999	0.390538
TCONS_00170044	LINC3108	XLOC_114503	XLOC_114503	5:72731179-72732030	0	0.20704	-6.44381	0.0179258	0.390829
TCONS_00071074	ENSRNOG00000031445-AS1	XLOC_046008	XLOC_046008	15:28191693-28217626	0	0.0886597	-10.0688	0.017982	0.390829
TCONS_00052240	RGD1563482-OT2	ENSRNOG00000001073	RGD1563482	12:37667635-37699665	0	0.0700173	-9.99658	0.0180015	0.390829
TCONS_00098142	LINC1832	XLOC_065143	XLOC_065143	18:43308418-43325002	0	0.138296	-10.0647	0.0180435	0.391278
TCONS_00190894	ENSRNOG00000061264-AS2	XLOC_129063	XLOC_129063	7:99763767-99765347	0.00139767	0.264928	-4.98794	0.0181169	0.392198
TCONS_00110302	LINC2076	XLOC_073866	XLOC_073866	2:163475019-163497615	0.108081	0	10.0873	0.0181225	0.392198
TCONS_00075369	AABR07018078.1-OT1	ENSRNOG00000053891	AABR07018078.1	15:38691707-38698713	0.035058	0	6.80429	0.0181554	0.392558
TCONS_00181010	LINC3298	XLOC_122015	XLOC_122015	6:140110117-140110558	0	0.384169	-6.34527	0.018171	0.392597
TCONS_00160020	ENSRNOG00000048726-AS3	XLOC_107714	XLOC_107714	4:162300143-162382418	0.031702	0.269266	-3.11658	0.0182216	0.392899
TCONS_00221569	ENSRNOG00000017256-AS1	XLOC_149335	XLOC_149335	9:92559527-92565559	0	0.0822623	-7.8697	0.0184106	0.395943
TCONS_00069971	LINC1300	XLOC_045109	XLOC_045109	15:4986130-4987128	0	0.175012	-6.46645	0.0185485	0.398198
ENSRNOT00000080500	AABR07040629.1-201	ENSRNOG00000052831	AABR07040629.1	X:106748119-106749637	0.106239	0	6.31359	0.0186198	0.399065
TCONS_00139611	LINC2604	XLOC_093602	XLOC_093602	3:14826192-14837607	0.001721	0.125265	-5.83615	0.0186567	0.399327
ENSRNOT00000089308	AABR07001700.1-201	ENSRNOG00000055830	AABR07001700.1	1:55298757-55436914	0	0.0159207	-10.0062	0.0187221	0.400497
TCONS_00034586	ENSRNOG00000003822-AS1	XLOC_021690	XLOC_021690	10:29029532-29033849	0	0.128064	-8.00532	0.0187511	0.400938
TCONS_00007903	LINC137	XLOC_005059	XLOC_005059	1:190612531-190617763	0.452093	0	10.0248	0.0188886	0.402807
TCONS_00188241	LINC3479	XLOC_126986	XLOC_126986	7:26984499-26992812	0	0.0573463	-7.82253	0.018973	0.403996
TCONS_00037350	ENSRNOG00000007335-AS1	XLOC_023439	XLOC_023439	10:69422541-69477177	0.0388667	0	10.0126	0.0190638	0.404979
ENSRNOT00000089924	AABR07018064.1-201	ENSRNOG00000061921	AABR07018064.1	15:38337990-38340923	0.0516253	0	6.26567	0.0190745	0.404979
TCONS_00148492	Ssmem1-OT1	ENSRNOG00000010345	Ssmem1	4:57823411-57831902	0.07582	0	8.28862	0.0191446	0.406108
TCONS_00049866	LINC907	XLOC_031486	XLOC_031486	12:46921582-46927202	0.415711	0.00247733	6.77106	0.0191631	0.406321
ENSRNOT00000085086	AABR07065895.1-201	ENSRNOG00000055113	AABR07065895.1	6:143879452-143879998	0.0679667	3.45858	-5.34715	0.0192802	0.407371
TCONS_00069936	LINC1295	XLOC_045086	XLOC_045086	15:4712627-4727019	0	0.147251	-9.94967	0.0194572	0.410031
ENSRNOT00000083482	AABR07046745.1-201	ENSRNOG00000052848	AABR07046745.1	5:4548208-4549248	0	0.165165	-6.3795	0.0194735	0.410195
ENSRNOT00000084434	AABR07024786.1-201	ENSRNOG00000059262	AABR07024786.1	16:16454743-16473307	0.0274583	0	7.83401	0.0196138	0.411256
TCONS_00088912	LINC1643	XLOC_058552	XLOC_058552	17:1152997-1172675	0.104671	0	9.96893	0.0196732	0.412239
TCONS_00065633	LINC1209	XLOC_042198	XLOC_042198	14:112338866-112359898	0.107855	0	9.96455	0.0197009	0.412459
TCONS_00089068	AABR07026893.1-OT2	ENSRNOG00000050796	AABR07026893.1	17:3711068-3730447	0.114553	0	9.95203	0.0198286	0.413921
ENSRNOT00000077149	AABR07039139.2-201	ENSRNOG00000052595	AABR07039139.2	X:69207486-69212355	0	0.101067	-7.82897	0.0198529	0.413921
TCONS_00068722	LINC1272	XLOC_044298	XLOC_044298	14:85730017-85732882	0.00412967	0.265262	-5.35892	0.0198546	0.413921
TCONS_00039206	Marchf10-OT1	ENSRNOG00000007084	Marchf10	10:93658047-93676234	0.123137	0	9.9452	0.0199417	0.414853
TCONS_00118766	LINC2255	XLOC_079957	XLOC_079957	2:151209306-151238152	0.077535	0	9.9452	0.0199444	0.414853
TCONS_00091212	Hist1h2bq-OT2	ENSRNOG00000021198	Hist1h2bq	17:43627901-43817767	91.4624	211.182	-1.21072	0.0200742	0.416834
TCONS_00188413	LINC3484	XLOC_127101	XLOC_127101	7:32955164-32980239	0	0.0761437	-9.80652	0.0201142	0.416991
TCONS_00044699	LINC795	XLOC_028289	XLOC_028289	11:31691032-31691936	0	0.201496	-6.48926	0.0201628	0.417413
TCONS_00154016	ENSRNOG00000036917-AS2	XLOC_103474	XLOC_103474	4:183696365-183702283	0	0.0780587	-7.74447	0.0203289	0.41941
TCONS_00130714	LINC2460	XLOC_087524	XLOC_087524	3:16924098-16926011	0	0.236012	-7.73737	0.0203686	0.420049
TCONS_00058005	Mfsd4a-OT1	ENSRNOG00000024657	Mfsd4a	13:48789097-48813228	0	0.076482	-9.75954	0.0207275	0.424002
TCONS_00127358	ENSRNOG00000000501-AS2	XLOC_085328	XLOC_085328	20:7783146-7787571	0	0.0989817	-7.69165	0.0207783	0.424501
TCONS_00124833	LINC2385	XLOC_083744	XLOC_083744	20:19706139-19718630	0.171573	0	9.88149	0.0208692	0.425997
TCONS_00203053	ENSRNOG00000019677-AS5	XLOC_137132	XLOC_137132	8:62547101-62584440	0	0.0528197	-9.84864	0.0208912	0.426085
TCONS_00121815	LINC2333	XLOC_081913	XLOC_081913	2:225976825-225984114	0.00872033	0.268516	-4.71785	0.0209872	0.427139
TCONS_00101582	ENSRNOG00000017178-AS1	XLOC_067546	XLOC_067546	19:41155001-41167641	0	0.152561	-9.77967	0.0210675	0.428227
TCONS_00159209	LINC2939	XLOC_107201	XLOC_107201	4:149752272-149772837	0.103049	0	9.86923	0.0210721	0.428227
ENSRNOT00000067667	Mln-201	ENSRNOG00000042186	Mln	20:6567092-6571791	0	0.091635	-7.64845	0.0210762	0.428227
TCONS_00046528	LINC836	XLOC_029532	XLOC_029532	11:73634157-73635430	0	0.344148	-7.71012	0.021195	0.429981
ENSRNOT00000082302	AABR07057510.3-201	ENSRNOG00000061463	AABR07057510.3	7:75228175-75249069	0	0.0213973	-7.74117	0.021226	0.430362
ENSRNOT00000093096	AC134224.1-201	ENSRNOG00000062127	AC134224.1	1:221154561-221156910	1.71527	21.6528	-3.66098	0.0212497	0.430481
TCONS_00051478	LOC685157-OT1	ENSRNOG00000047079	LOC685157	12:20184471-20332807	7.33333e-06	0.00607067	-6.84918	0.0212875	0.430883
ENSRNOT00000079208	AABR07051308.1-201	ENSRNOG00000058862	AABR07051308.1	3:4730990-4772154	1.01922	0.008278	6.89111	0.0216257	0.436081
TCONS_00031084	Thra-OT1	ENSRNOG00000009066	Thra	10:86682350-86689866	0.290584	2.26486	-2.98666	0.0216557	0.436502
TCONS_00219396	LINC4066	XLOC_147836	XLOC_147836	9:44187306-44191870	0.0484373	0.667252	-3.71234	0.0216982	0.436993
ENSRNOT00000089652	LOC690414-202	ENSRNOG00000061345	LOC690414	17:20997983-21012515	0.035942	0	7.85853	0.0217689	0.438037
TCONS_00057068	LINC1059	XLOC_036104	XLOC_036104	13:109726645-109733591	0.0668633	0	7.69909	0.0217773	0.438037
TCONS_00160089	LINC2954	XLOC_107768	XLOC_107768	4:163282940-163293392	0.17672	0	9.81298	0.0218652	0.439255
TCONS_00211413	LINC3884	XLOC_142733	XLOC_142733	8:111868573-111881174	0.159413	0	9.80698	0.0219215	0.439897
TCONS_00113849	LINC2150	XLOC_076173	XLOC_076173	2:251900938-251904784	0	0.106994	-7.59297	0.0219508	0.439897
TCONS_00081077	ENSRNOG00000014520-AS2	XLOC_053112	XLOC_053112	16:83276126-83285699	0	0.182628	-9.68187	0.0219517	0.439897
TCONS_00051498	LINC946	XLOC_032446	XLOC_032446	12:20284930-20332806	0.0384003	0	9.80472	0.0220015	0.440523
TCONS_00158004	LINC2914	XLOC_106301	XLOC_106301	4:119152638-119154765	0.247321	0	7.88655	0.0220593	0.4411
TCONS_00081784	ENSRNOG00000020080-AS1	XLOC_053581	XLOC_053581	16:9245326-9258817	0.101466	0.907169	-3.18126	0.0220731	0.4411
ENSRNOT00000080248	AABR07071512.1-201	ENSRNOG00000055306	AABR07071512.1	8:119317102-119319954	0	0.080271	-6.80314	0.022169	0.44259
TCONS_00095538	LINC1789	XLOC_063312	XLOC_063312	18:56986249-57006843	0	0.089927	-9.75529	0.0222697	0.444417
ENSRNOT00000079308	LOC100911156-201	ENSRNOG00000060093	LOC100911156	20:45681159-45684630	0.122522	0	7.65277	0.0223344	0.445339
TCONS_00140103	Orc4-OT1	ENSRNOG00000005021	Orc4	3:33061079-33075685	0	0.125386	-9.73999	0.0224866	0.447263
TCONS_00211027	Pls1-OT1	ENSRNOG00000009945	Pls1	8:103555716-103562939	0	0.122799	-8.70642	0.0225671	0.44753
TCONS_00156168	LINC2883	XLOC_105088	XLOC_105088	4:64112433-64127098	0	0.122399	-9.67499	0.0226396	0.44802
TCONS_00049864	LINC905	XLOC_031486	XLOC_031486	12:46921570-46927202	0	0.321207	-9.72452	0.0226888	0.44802
TCONS_00054960	Angptl1-OT1	ENSRNOG00000004712	Angptl1	13:74421782-74520603	0.134367	0.644544	-2.29409	0.0226903	0.44802
TCONS_00038274	ENSRNOG00000007573-AS1	XLOC_024045	XLOC_024045	10:84112598-84123109	0	0.0402843	-7.65682	0.0227087	0.44802
TCONS_00192257	ENSRNOG00000018920-AS1	XLOC_129957	XLOC_129957	7:122524569-122543830	0	0.0874923	-9.62622	0.0227107	0.44802
TCONS_00033058	ENSRNOG00000053079-AS1	XLOC_020706	XLOC_020706	10:999697-1006101	0	0.116035	-8.44977	0.02274	0.448414
TCONS_00009937	LINC160	XLOC_006179	XLOC_006179	1:221182906-221210057	0	0.0650197	-9.6501	0.0229521	0.451304
TCONS_00095612	LINC1790	XLOC_063354	XLOC_063354	18:57471662-57480754	0.0480753	0	7.61843	0.0230663	0.45281
TCONS_00193091	LINC3563	XLOC_130472	XLOC_130472	7:139326736-139336157	0	0.0440147	-7.61163	0.0230859	0.453011
TCONS_00156406	ENSRNOG00000014312-AS1	XLOC_105242	XLOC_105242	4:70824629-70829003	0	0.092886	-7.57636	0.0232301	0.454728
TCONS_00038149	ENSRNOG00000004155-AS1	XLOC_023970	XLOC_023970	10:82820190-82823960	0	0.107394	-7.58181	0.023357	0.4561
TCONS_00183126	LINC3355	XLOC_123596	XLOC_123596	6:42864578-42872983	0	0.046566	-7.54142	0.023367	0.456111
TCONS_00115995	LINC2195	XLOC_077690	XLOC_077690	2:52996868-53001006	0.00193533	0.110345	-5.09455	0.0236473	0.460462
ENSRNOT00000084386	AABR07065814.6-201	ENSRNOG00000055537	AABR07065814.6	6:142404865-142405483	0.0205677	1.04668	-5.11454	0.0236828	0.46064
ENSRNOT00000087766	AABR07063250.2-201	ENSRNOG00000061045	AABR07063250.2	6:24259912-24264571	0	0.0808327	-7.45869	0.023789	0.461915
ENSRNOT00000089368	AABR07063613.1-201	ENSRNOG00000053708	AABR07063613.1	6:37188670-37206037	0	0.0993607	-9.65549	0.0238958	0.462988
TCONS_00160987	AABR07046628.1-OT1	ENSRNOG00000047922	AABR07046628.1	5:153817-199501	0.105461	0.00224733	5.34027	0.0239517	0.46358
TCONS_00113168	Tifa-OT1	ENSRNOG00000010941	Tifa	2:232127671-232221234	0.127565	1.36803	-3.43168	0.0240813	0.46534
TCONS_00210280	Mlip-OT1	ENSRNOG00000005934	Mlip	8:84514569-84532176	0.0259127	0	7.69536	0.0241792	0.466671
TCONS_00221412	LINC4095	XLOC_149240	XLOC_149240	9:87812237-87823043	0	0.15328	-9.55677	0.0242142	0.466785
TCONS_00222619	LINC4130	XLOC_150099	XLOC_150099	9:119493845-119499062	0.0812517	0	7.6952	0.0243738	0.469297
TCONS_00230145	LINC4258	XLOC_155665	XLOC_155665	X:87543326-87551867	0.296177	0.0141887	4.1938	0.0245424	0.471978
TCONS_00212319	LINC3903	XLOC_143268	XLOC_143268	8:123636621-123639182	0.1627	0	7.67722	0.0246862	0.473883
TCONS_00076457	LINC1412	XLOC_049786	XLOC_049786	15:59056372-59074036	0	0.0869927	-9.49373	0.0246906	0.473883
TCONS_00075678	LINC1399	XLOC_049197	XLOC_049197	15:44179021-44244956	0.0273323	0	9.63334	0.0247113	0.474092
TCONS_00160921	Amn1-OT5	ENSRNOG00000036917	Amn1	4:183670596-183698004	0.00136933	0.154815	-6.66254	0.0247261	0.474186
TCONS_00053321	ENSRNOG00000014859-AS1	XLOC_033516	XLOC_033516	13:25191035-25262348	0.024927	0	9.63142	0.0247522	0.474309
TCONS_00181894	LINC3326	XLOC_122725	XLOC_122725	6:10768319-10843256	1.60682	0.004985	8.23148	0.024894	0.476078
ENSRNOT00000082638	AABR07004888.1-201	ENSRNOG00000056725	AABR07004888.1	1:166119376-166120978	0	0.0837457	-6.02174	0.0249326	0.476629
TCONS_00189710	Gns-OT1	ENSRNOG00000047350	Gns	7:63494901-63501058	6.9495	0.748793	3.13664	0.0249837	0.477415
ENSRNOT00000080219	AABR07060620.1-202	ENSRNOG00000052491	AABR07060620.1	4:86698113-86833259	0	0.0111833	-9.46961	0.0251268	0.47901
TCONS_00126275	LINC2398	XLOC_084835	XLOC_084835	20:50074048-50082809	0	0.183807	-9.55411	0.0252389	0.479838
TCONS_00081496	LINC1491	XLOC_053423	XLOC_053423	16:4448679-4457629	0	0.178675	-9.54827	0.0253176	0.480367
TCONS_00088261	AABR07028665.1-OT1	ENSRNOG00000051589	AABR07028665.1	17:79721177-79798453	0	0.020255	-9.47977	0.0254456	0.482225
TCONS_00145800	LINC2716	XLOC_097797	XLOC_097797	3:164506191-164512330	0	0.0570217	-7.39302	0.02548	0.482687
TCONS_00005000	ENSRNOG00000021130-AS1	XLOC_003060	XLOC_003060	1:102149496-102162824	0.129869	0	9.57411	0.0255143	0.482958
TCONS_00158341	LINC2922	XLOC_106567	XLOC_106567	4:123290828-123292499	0.00714967	0.34041	-4.94229	0.0257166	0.485467
ENSRNOT00000079885	AABR07064099.1-201	ENSRNOG00000053849	AABR07064099.1	6:64587100-64609181	0.0526803	1.03622	-4.35644	0.0257866	0.486392
TCONS_00020692	ENSRNOG00000024602-AS1	XLOC_013306	XLOC_013306	1:185470978-185485331	0	0.100706	-9.40493	0.025969	0.488064
ENSRNOT00000085939	AABR07052897.3-201	ENSRNOG00000060635	AABR07052897.3	3:83052724-83134363	0	0.019097	-9.51268	0.0259823	0.488064
TCONS_00040357	ENSRNOG00000030537-AS1	XLOC_025329	XLOC_025329	10:108503609-108504137	0.26805	0	6.06025	0.0260056	0.488104
TCONS_00143763	ENSRNOG00000021259-AS1	XLOC_096414	XLOC_096414	3:124517500-124519141	0	0.259428	-7.63724	0.0260449	0.488104
TCONS_00013263	LINC213	XLOC_008349	XLOC_008349	1:8123648-8155845	0	0.0475957	-9.44546	0.0260655	0.488104
ENSRNOT00000086500	AABR07019449.1-201	ENSRNOG00000059711	AABR07019449.1	15:106155514-106195488	0	0.0380293	-9.43384	0.0261622	0.488696
ENSRNOT00000085724	RT1-DOb-202	ENSRNOG00000000454	RT1-DOb	20:4023992-4026183	0	0.1522	-7.2998	0.026229	0.48937
TCONS_00151475	LINC2819	XLOC_101755	XLOC_101755	4:124916440-125084901	0.135926	0.004174	4.94584	0.0262734	0.489819
TCONS_00194080	ENSRNOG00000045610-AS1	XLOC_131057	XLOC_131057	7:9312986-9348441	0	0.0425597	-9.42213	0.0263224	0.490353
TCONS_00111668	LINC2105	XLOC_074656	XLOC_074656	2:197194702-197206290	0	0.129268	-9.41624	0.0264122	0.490861
TCONS_00111488	LINC2102	XLOC_074567	XLOC_074567	2:193526596-193540760	0	0.099828	-9.37407	0.0264648	0.490861
TCONS_00146033	LINC2728	XLOC_097983	XLOC_097983	3:170715266-170722583	0	0.0703467	-7.93083	0.0264682	0.490861
TCONS_00220176	LOC108351936-OT6	ENSRNOG00000021406	LOC108351936	9:64695881-64845217	0.00148833	0.116446	-6.31001	0.0265219	0.491093
TCONS_00096344	LINC1802	XLOC_063844	XLOC_063844	18:75852056-75865351	0	0.112013	-9.40438	0.0265726	0.491093
TCONS_00166938	LINC3069	XLOC_112364	XLOC_112364	5:158344889-158345276	0.393149	0	6.25085	0.026681	0.491898
TCONS_00086867	LOC100910554-OT1	ENSRNOG00000051758	LOC100910554	17:44737957-44758168	25.5194	97.54	-2.00243	0.0267001	0.492062
ENSRNOT00000081905	AABR07002902.1-201	ENSRNOG00000056429	AABR07002902.1	1:88632188-88635003	0.119784	0	7.3242	0.026714	0.49213
TCONS_00034106	LINC580	XLOC_021317	XLOC_021317	10:15607271-15609032	0.203444	0	7.39519	0.0271906	0.498594
TCONS_00173810	LINC3159	XLOC_117031	XLOC_117031	5:160290893-160292515	0.267674	0	7.62203	0.0272013	0.498594
TCONS_00101123	LOC498933-OT1	ENSRNOG00000011671	LOC498933	19:32364358-32376599	0	0.118651	-9.36821	0.0272502	0.498956
TCONS_00216510	LINC3997	XLOC_145940	XLOC_145940	9:91356643-91367594	0.147111	0	9.47507	0.0272693	0.498966
TCONS_00095233	LINC1783	XLOC_063094	XLOC_063094	18:50315318-50316565	0	0.249697	-7.20929	0.0273401	0.499531
TCONS_00127853	LINC2414	XLOC_085664	XLOC_085664	20:14153712-14157336	0	0.108993	-7.54349	0.0273413	0.499531
TCONS_00080693	Defal1-OT1	ENSRNOG00000029462	Defal1	16:75338051-75415458	3.55792	12.9934	-1.8405	0.0274307	0.499961
ENSRNOT00000078601	AABR07048046.1-201	ENSRNOG00000060050	AABR07048046.1	5:58717936-58721969	0.0810493	0	7.2772	0.0274401	0.499961
TCONS_00080040	LINC1468	XLOC_052366	XLOC_052366	16:59270988-59281044	0.005658	0.206956	-5.04946	0.0274973	0.500452
TCONS_00115996	LINC2194	XLOC_077690	XLOC_077690	2:52996868-53001006	0	0.0821333	-7.31759	0.0275023	0.500452
ENSRNOT00000089770	AABR07071969.1-201	ENSRNOG00000056322	AABR07071969.1	1:178595805-178608096	0.032201	0	7.47328	0.0275423	0.500877
TCONS_00071235	AABR07017850.1-OT1	ENSRNOG00000050432	AABR07017850.1	15:31782801-32001334	0	0.00647867	-9.33112	0.0280603	0.507615
TCONS_00167261	LINC3075	XLOC_112584	XLOC_112584	5:165190856-165192498	0	0.232976	-7.50362	0.0280768	0.507694
TCONS_00217909	LINC4025	XLOC_146906	XLOC_146906	9:122023534-122038214	0.350725	0.0303447	3.49127	0.0280858	0.507694
TCONS_00211668	LINC3893	XLOC_142932	XLOC_142932	8:114620698-114632080	0	0.125416	-9.38073	0.0281048	0.507847
TCONS_00066361	ENSRNOG00000002345-AS1	XLOC_042693	XLOC_042693	14:11994228-12003574	0	0.150361	-9.32484	0.0281314	0.507947
TCONS_00057892	ENSRNOG00000004405-AS1	XLOC_036756	XLOC_036756	13:47567954-47601107	0	0.0396187	-9.27175	0.0282671	0.509442
TCONS_00040992	ENSRNOG00000055793-AS1	XLOC_025787	XLOC_025787	11:15760630-16013638	0.00613533	0.092786	-3.89343	0.0283733	0.510558
TCONS_00228084	LINC4231	XLOC_154213	XLOC_154213	X:11592444-11595330	0	0.105674	-7.17795	0.0283781	0.510558
ENSRNOT00000087041	AABR07012023.1-201	ENSRNOG00000057849	AABR07012023.1	2:182712194-182717296	0	0.0670893	-7.33228	0.0284182	0.511019
ENSRNOT00000087549	AABR07026137.1-201	ENSRNOG00000054486	AABR07026137.1	16:65178163-65254630	0.0198073	0	9.39812	0.0284351	0.511079
ENSRNOT00000084361	LOC102550441-202	ENSRNOG00000055474	LOC102550441	7:131374710-131435251	0	0.021612	-9.26616	0.0284428	0.511079
TCONS_00131629	ENSRNOG00000007012-AS2	XLOC_088205	XLOC_088205	3:46442459-46444749	0	0.131741	-7.17443	0.0285811	0.512608
TCONS_00212321	LINC3904	XLOC_143269	XLOC_143269	8:123644929-123651813	0.219108	0	9.38029	0.0287108	0.51436
TCONS_00203176	ENSRNOG00000026171-AS1	XLOC_137224	XLOC_137224	8:64150943-64159313	0	0.154591	-9.24925	0.0287572	0.514892
TCONS_00188312	Nup37-OT1	ENSRNOG00000004727	Nup37	7:28701677-28715239	0.0994737	0	9.36238	0.0291279	0.518937
TCONS_00146032	LINC2727	XLOC_097983	XLOC_097983	3:170715266-170722562	0	0.059787	-7.69436	0.0291493	0.519095
TCONS_00017861	ENSRNOG00000020949-AS1	XLOC_011359	XLOC_011359	1:101542019-101545362	0.090078	0	7.17138	0.0291583	0.519095
TCONS_00111933	LINC2111	XLOC_074806	XLOC_074806	2:199856554-199866015	0	0.142029	-9.26052	0.0291948	0.519358
TCONS_00124130	LOC499407-OT4	ENSRNOG00000058912	LOC499407	20:7331332-7397449	0.0750123	1.76808	-4.6127	0.0292125	0.519358
ENSRNOT00000082305	AC111287.1-201	ENSRNOG00000059841	AC111287.1	19:43187789-43188705	0	0.157502	-6.15751	0.0294204	0.521448
TCONS_00187124	LINC3452	XLOC_126348	XLOC_126348	7:1316287-1328938	0	0.105312	-9.24731	0.0295324	0.523048
TCONS_00039648	LINC692	XLOC_024866	XLOC_024866	10:101334284-101340933	0	0.19742	-9.22725	0.0298348	0.526875
TCONS_00205412	LINC3784	XLOC_138751	XLOC_138751	8:115478430-115490809	0	0.106239	-9.22725	0.0298359	0.526875
TCONS_00131823	ENSRNOG00000029342-AS1	XLOC_088351	XLOC_088351	3:52849811-52877143	0.0482843	0	9.32822	0.0298844	0.527299
TCONS_00034620	LINC598	XLOC_021715	XLOC_021715	10:29997809-30033530	0.0407187	0	9.32747	0.0298928	0.527299
TCONS_00046342	LINC831	XLOC_029394	XLOC_029394	11:71483433-71486769	0.110941	0	7.42186	0.0301843	0.531183
TCONS_00055574	LINC1020	XLOC_034988	XLOC_034988	13:85774742-85776682	0	0.16411	-7.22837	0.0301901	0.531183
TCONS_00083116	LINC1511	XLOC_054470	XLOC_054470	16:46316554-46326837	0	0.128505	-9.27142	0.0302079	0.531301
ENSRNOT00000081665	AABR07060341.1-201	ENSRNOG00000059731	AABR07060341.1	4:68424505-68451552	0.0105913	0	7.12051	0.0302887	0.532333
TCONS_00230373	LINC4269	XLOC_155835	XLOC_155835	X:106647206-106652064	0.130618	0.000144333	6.42582	0.0305354	0.536104
TCONS_00171270	LINC3127	XLOC_115380	XLOC_115380	5:125432351-125439602	0	0.180322	-9.25715	0.0305376	0.536104
TCONS_00197934	LINC3674	XLOC_133869	XLOC_133869	7:104433086-104442256	0.154975	0	9.29116	0.0305477	0.536104
TCONS_00042023	ENSRNOG00000001616-AS2	XLOC_026444	XLOC_026444	11:46937295-46978404	0.0343937	0	9.28501	0.0306962	0.537861
TCONS_00144164	LINC2679	XLOC_096740	XLOC_096740	3:137985044-137992615	0	0.16802	-9.17935	0.0307207	0.537861
TCONS_00188082	LINC3472	XLOC_126880	XLOC_126880	7:23316241-23321406	0.00957367	0.23376	-4.51408	0.0307599	0.537861
TCONS_00188170	LINC3475	XLOC_126947	XLOC_126947	7:25704537-25706579	0	0.140149	-7.09043	0.0307914	0.537861
TCONS_00061287	ENSRNOG00000024545-AS1	XLOC_039066	XLOC_039066	14:2578494-2585996	0	0.167739	-9.16537	0.0309768	0.540034
ENSRNOT00000038660	RT1-A2-201	ENSRNOG00000030712	RT1-A2	20:5375650-5377440	0.657621	12.2223	-4.20818	0.0311706	0.542098
TCONS_00037819	ENSRNOG00000007845-AS1	XLOC_023745	XLOC_023745	10:75033162-75040048	0.0961357	0.85072	-3.16537	0.0312403	0.542137
TCONS_00014648	LINC240	XLOC_009389	XLOC_009389	1:45482247-45486253	0	0.077747	-7.21708	0.0313555	0.543353
TCONS_00110020	LINC2064	XLOC_073622	XLOC_073622	2:152708328-152708972	0	0.175467	-5.85846	0.0314532	0.544458
TCONS_00113393	LINC2140	XLOC_075842	XLOC_075842	2:238069027-238072328	0.086343	0	7.08745	0.0315172	0.545167
TCONS_00132338	LINC2491	XLOC_088747	XLOC_088747	3:60397957-60408020	0.135157	0	9.24385	0.0315546	0.545167
TCONS_00217010	LINC4007	XLOC_146243	XLOC_146243	9:98744747-98754680	0	0.116596	-9.08747	0.0316225	0.545432
TCONS_00160299	LINC2957	XLOC_107891	XLOC_107891	4:168551453-168557925	0.208544	0	9.23757	0.03163	0.545432
TCONS_00092572	LINC1730	XLOC_061248	XLOC_061248	17:75739751-75741217	0	0.0780367	-5.82825	0.0316944	0.54575
TCONS_00042187	LINC747	XLOC_026560	XLOC_026560	11:53606795-53617286	0.00756733	0.276698	-5.01121	0.0316978	0.54575
TCONS_00047643	LINC876	XLOC_030240	XLOC_030240	12:5908913-5910577	0.189514	0	7.14617	0.0317413	0.545914
TCONS_00187066	LINC3437	XLOC_126305	XLOC_126305	7:407013-411424	0	0.0602737	-6.97785	0.0318107	0.546912
ENSRNOT00000084024	AABR07019088.1-201	ENSRNOG00000057291	AABR07019088.1	15:87540751-87561581	0	0.055099	-9.07473	0.0318748	0.547819
TCONS_00011186	LINC178	XLOC_006941	XLOC_006941	1:245101552-245112033	0.116846	0	9.22059	0.0318958	0.54797
TCONS_00016442	Relb-OT1	ENSRNOG00000033235	Relb	1:80540377-80545025	0.260434	0	9.20812	0.0320574	0.549586
TCONS_00069332	LINC1287	XLOC_044697	XLOC_044697	14:107626611-107631871	0	0.05205	-7.00054	0.032065	0.549586
TCONS_00004701	Syt3-OT1	ENSRNOG00000019318	Syt3	1:100379186-100394624	0	0.0778677	-9.10071	0.032095	0.54965
TCONS_00202125	ENSRNOG00000032364-AS5	XLOC_136552	XLOC_136552	8:46740605-46765447	0.155774	0.00212033	5.82645	0.0322064	0.551159
TCONS_00185214	ENSRNOG00000008399-AS1	XLOC_125138	XLOC_125138	6:107005871-107015094	0	0.121884	-9.04238	0.0322814	0.551949
ENSRNOT00000081199	AABR07035780.3-202	ENSRNOG00000058398	AABR07035780.3	12:22359482-22361493	0.01004	0.343667	-4.80154	0.0323322	0.552409
TCONS_00119799	LINC2298	XLOC_080634	XLOC_080634	2:187501779-187509531	0	0.153557	-9.08594	0.0323368	0.552409
TCONS_00208519	LINC3828	XLOC_140710	XLOC_140710	8:52720508-52725494	0.054406	0	7.03427	0.0323966	0.553094
TCONS_00114729	ENSRNOG00000023588-AS1	XLOC_076779	XLOC_076779	2:23362178-23369656	0.0375283	0	7.00018	0.0325561	0.554864
TCONS_00051544	LOC108348155-OT1	ENSRNOG00000050981	LOC108348155	12:21330955-21392390	0.021002	0	9.17326	0.0326919	0.555835
ENSRNOT00000091485	RT1-DOa-203	ENSRNOG00000026762	RT1-DOa	20:3889425-3892449	0	0.0387057	-5.91161	0.0327842	0.5565
TCONS_00218885	LINC4052	XLOC_147506	XLOC_147506	9:20371022-20377619	0	0.177412	-9.05594	0.032801	0.556589
TCONS_00047459	LINC872	XLOC_030129	XLOC_030129	12:1345103-1347135	0.16544	0	7.22644	0.0328348	0.556966
TCONS_00007418	Akip1-OT3	ENSRNOG00000013744	Akip1	1:174330648-174339494	0	0.135446	-9.12984	0.0328919	0.557483
TCONS_00023925	LINC411	XLOC_015108	XLOC_015108	1:236420823-236426103	0	0.219724	-9.04834	0.0329069	0.557483
ENSRNOT00000088866	AABR07060595.1-201	ENSRNOG00000054078	AABR07060595.1	4:83332229-83380104	0	0.024303	-9.04834	0.0329116	0.557483
TCONS_00052619	LINC971	XLOC_033059	XLOC_033059	12:41507036-41517464	0.0270903	0	7.10781	0.0329295	0.557564
TCONS_00210485	LINC3860	XLOC_142089	XLOC_142089	8:90773089-90775925	0	0.090272	-6.92642	0.0332772	0.560255
TCONS_00121818	LINC2334	XLOC_081918	XLOC_081918	2:225986265-225986852	0	0.209423	-5.90328	0.0332835	0.560255
ENSRNOT00000089636	AABR07012131.1-203	ENSRNOG00000060439	AABR07012131.1	2:186745467-186752567	0.003346	0.129331	-4.94833	0.0333399	0.5606
ENSRNOT00000086643	AABR07052523.2-201	ENSRNOG00000060690	AABR07052523.2	3:59389110-59396602	0	0.0346603	-6.93111	0.0334043	0.560916
TCONS_00108634	LINC2040	XLOC_072584	XLOC_072584	2:98272327-98276164	0.328261	0	9.13326	0.0334258	0.560916
TCONS_00122590	LINC2347	XLOC_082478	XLOC_082478	2:249086500-249093149	0	0.175667	-9.09817	0.0334402	0.560916
TCONS_00110282	LINC2070	XLOC_073852	XLOC_073852	2:161650381-161657742	0.347014	0.021373	3.88102	0.0334714	0.561243
TCONS_00032898	ENSRNOG00000047531-AS1	XLOC_020606	XLOC_020606	10:110092473-110099880	0	0.153549	-9.01753	0.0335548	0.562251
TCONS_00031085	Thra-OT2	ENSRNOG00000009066	Thra	10:86682380-86691896	3.21809	0.495723	2.68076	0.0336049	0.562894
TCONS_00106387	ENSRNOG00000016342-AS1	XLOC_070880	XLOC_070880	2:20140607-20152877	0	0.092326	-9.00973	0.033778	0.565007
TCONS_00020879	Pdzd9-OT1	ENSRNOG00000016292	Pdzd9	1:190523230-190586028	0	0.0183603	-9.07396	0.0338793	0.565916
TCONS_00157361	ENSRNOG00000049829-AS2	XLOC_105897	XLOC_105897	4:98518577-98523470	1.04759	6.37848	-2.58914	0.0339398	0.566563
TCONS_00160278	LINC2956	XLOC_107876	XLOC_107876	4:168080143-168103296	0	0.04835	-8.99399	0.034012	0.567264
ENSRNOT00000076968	AABR07038986.1-201	ENSRNOG00000021694	AABR07038986.1	X:65411161-65559785	0.00841233	0	9.10843	0.0340514	0.567264
TCONS_00099013	ENSRNOG00000016685-AS1	XLOC_065786	XLOC_065786	18:64114030-64115317	0	0.194535	-6.91261	0.0340643	0.567264
TCONS_00146634	LINC2750	XLOC_098379	XLOC_098379	4:2356853-2364078	0	0.157383	-9.05759	0.0342145	0.56895
TCONS_00222617	LINC4129	XLOC_150099	XLOC_150099	9:119477773-119499062	0	0.0488293	-8.93371	0.0343771	0.57067
ENSRNOT00000088938	AABR07021419.1-201	ENSRNOG00000052817	AABR07021419.1	13:71145614-71147919	0	0.117201	-6.99949	0.0343975	0.570812
ENSRNOT00000085384	AABR07005779.5-201	ENSRNOG00000056571	AABR07005779.5	1:198162429-198168448	0.00448267	0.124808	-4.38693	0.0345243	0.571931
ENSRNOT00000083987	Neu1-204	ENSRNOG00000032942	Neu1	20:4611631-4612413	5.33333e-05	0.356447	-3.94988	0.0346618	0.573115
TCONS_00177325	LINC3214	XLOC_119454	XLOC_119454	6:59851757-59882988	0.0390587	0	9.07322	0.0346658	0.573115
TCONS_00074808	ENSRNOG00000025515-AS1	XLOC_048699	XLOC_048699	15:28260200-28261096	0.0164513	0.515831	-4.60744	0.0346791	0.573115
ENSRNOT00000084993	AABR07016721.1-201	ENSRNOG00000057717	AABR07016721.1	14:112422955-112467189	0	0.02315	-8.91239	0.0347711	0.574242
TCONS_00160010	LOC689757-OT2	ENSRNOG00000037076	LOC689757	4:162187497-162247839	0.041024	0.505446	-3.60511	0.0348474	0.575304
TCONS_00149375	LINC2786	XLOC_100298	XLOC_100298	4:77155942-77158885	0	0.0806257	-6.8435	0.0350779	0.577473
TCONS_00083181	LINC1515	XLOC_054524	XLOC_054524	16:47305049-47315365	0.109424	0.002134	5.33943	0.0352553	0.579259
TCONS_00025318	LINC441	XLOC_016068	XLOC_016068	1:273351058-273362888	0	0.0854173	-8.89076	0.0352859	0.579564
ENSRNOT00000078486	AABR07053470.1-202	ENSRNOG00000058999	AABR07053470.1	3:108624337-108641847	0	0.0617823	-8.98154	0.0355096	0.582842
TCONS_00134960	LINC2539	XLOC_090480	XLOC_090480	3:122828056-122829507	0.185513	0	6.93649	0.0355557	0.583003
ENSRNOT00000083980	AABR07008788.1-201	ENSRNOG00000057307	AABR07008788.1	2:73912228-73956986	0	0.0236067	-8.91262	0.0356247	0.583171
TCONS_00102273	LINC1897	XLOC_068080	XLOC_068080	19:53365994-53370017	0.00243933	0.0949523	-4.86912	0.0356386	0.583171
TCONS_00146635	LINC2749	XLOC_098379	XLOC_098379	4:2356853-2364078	0	0.148732	-8.97284	0.0357255	0.58408
TCONS_00149816	ENSRNOG00000009636-AS1	XLOC_100596	XLOC_100596	4:84740108-84749308	0.127313	0	9.01503	0.0357627	0.584083
TCONS_00230357	ENSRNOG00000049985-AS3	XLOC_155823	XLOC_155823	X:106306110-106307713	0.173781	0	6.99587	0.0360165	0.586764
ENSRNOT00000087000	AABR07045403.1-201	ENSRNOG00000058135	AABR07045403.1	20:46417239-46422760	0.0480717	0	6.91116	0.0361667	0.589011
TCONS_00142537	LINC2644	XLOC_095628	XLOC_095628	3:106180234-106191612	0.0998723	0	8.99127	0.0361941	0.589259
TCONS_00210164	LINC3858	XLOC_141840	XLOC_141840	8:80830575-80839128	0.0540983	0	7.84301	0.0362442	0.589675
ENSRNOT00000077214	AABR07071392.1-201	ENSRNOG00000058516	AABR07071392.1	8:113630509-113667006	0	0.0288353	-8.94641	0.0363132	0.590399
TCONS_00216858	LINC4003	XLOC_146147	XLOC_146147	9:97401789-97414470	0.611699	0.071964	3.03735	0.0364088	0.591754
TCONS_00064013	LINC1186	XLOC_041087	XLOC_041087	14:72475302-72492574	0.065104	0	8.97627	0.036444	0.592056
TCONS_00227722	ENSRNOG00000061304-AS1	XLOC_153987	XLOC_153987	X:157250377-157255206	0	0.212439	-8.87014	0.0364938	0.592336
TCONS_00003472	LINC72	XLOC_002242	XLOC_002242	1:81105661-81115479	0.11553	0	8.96979	0.0366176	0.593745
TCONS_00015336	LINC258	XLOC_009941	XLOC_009941	1:54198058-54206554	0.133535	0	8.96979	0.0366345	0.59382
TCONS_00110630	LINC2082	XLOC_074118	XLOC_074118	2:178903526-178946858	0	0.024038	-8.92851	0.036735	0.594785
TCONS_00153343	ENSRNOG00000008439-AS2	XLOC_102989	XLOC_102989	4:168867425-168878633	0	0.092769	-8.92851	0.0367357	0.594785
TCONS_00139610	LINC2602	XLOC_093602	XLOC_093602	3:14826192-14833717	0.135775	0	8.96301	0.0368237	0.59521
TCONS_00156690	ENSRNOG00000008416-AS2	XLOC_105408	XLOC_105408	4:78381938-78388616	0.166852	0	8.96111	0.0368439	0.59521
TCONS_00042836	LINC759	XLOC_026986	XLOC_026986	11:70963164-70965018	0.018694	0.515942	-4.7301	0.0369826	0.59665
TCONS_00120242	LINC2304	XLOC_080859	XLOC_080859	2:193526360-193531237	0.20772	0	8.94809	0.0370833	0.597475
TCONS_00130476	ENSRNOG00000057044-AS1	XLOC_087359	XLOC_087359	3:12155047-12176549	0	0.0476517	-8.9104	0.0371207	0.597879
TCONS_00181812	LINC3325	XLOC_122658	XLOC_122658	6:9707598-9715331	0	0.122145	-8.79304	0.0372682	0.599269
TCONS_00191284	LINC3538	XLOC_129349	XLOC_129349	7:109023022-109032398	0.107317	0	8.94058	0.0372693	0.599269
TCONS_00220398	LINC4086	XLOC_148514	XLOC_148514	9:67445214-67452785	0	0.132489	-8.83524	0.0374042	0.600436
TCONS_00047035	LINC856	XLOC_029881	XLOC_029881	11:85575259-85580686	0.006727	0.204281	-4.73111	0.0374961	0.60151
TCONS_00035062	ENSRNOG00000031208-AS1	XLOC_022105	XLOC_022105	10:34450056-34524020	0.111123	0.555097	-2.34007	0.0376121	0.602822
TCONS_00149786	Creb5-OT1	ENSRNOG00000008622	Creb5	4:83713666-83775762	1.17445	0.272239	2.07321	0.0377177	0.603859
TCONS_00139404	Cfap157-OT1	ENSRNOG00000039315	Cfap157	3:11811943-11816622	0.230736	0	8.91466	0.0378567	0.605682
TCONS_00198763	LINC3693	XLOC_134368	XLOC_134368	7:119908570-119926609	0	0.055249	-8.86408	0.0380248	0.607435
TCONS_00173347	LINC3150	XLOC_116725	XLOC_116725	5:154465441-154481909	0	0.0602927	-8.86408	0.0380293	0.607435
ENSRNOT00000030993	LOC102555023-201	ENSRNOG00000022163	LOC102555023	18:12638770-12641042	0	0.096003	-6.7235	0.038224	0.609937
TCONS_00210637	LINC3867	XLOC_142213	XLOC_142213	8:95617650-95625457	0.137083	0	8.89884	0.0382773	0.610346
ENSRNOT00000084534	AABR07063581.1-201	ENSRNOG00000058114	AABR07063581.1	6:36078811-36082110	0	0.0659203	-6.7131	0.0383956	0.61112
TCONS_00175445	LINC3188	XLOC_118085	XLOC_118085	6:9656575-9657672	0.0165453	0.375781	-4.08627	0.0384026	0.61112
TCONS_00035446	LINC610	XLOC_022299	XLOC_022299	10:39610943-39617552	0	0.146104	-8.78125	0.0384122	0.61112
TCONS_00109986	LINC2063	XLOC_073588	XLOC_073588	2:151238136-151244308	0.173802	0	8.89109	0.0384512	0.611337
TCONS_00083242	LINC1520	XLOC_054577	XLOC_054577	16:48271962-48306109	0	0.0288073	-8.84513	0.0385853	0.612803
TCONS_00075557	LINC1396	XLOC_049095	XLOC_049095	15:42210578-42216312	0	0.166888	-8.77205	0.0386464	0.613193
ENSRNOT00000076224	AC141377.1-201	ENSRNOG00000051189	AC141377.1	X:70439998-70446732	0	0.0349673	-6.79742	0.0387316	0.613993
TCONS_00080557	Adam18-OT1	ENSRNOG00000017683	Adam18	16:72190470-72210900	0	0.0467257	-8.76279	0.0387415	0.613993
ENSRNOT00000085102	AABR07053849.3-201	ENSRNOG00000061932	AABR07053849.3	3:130594778-130601544	0.0336237	0	6.75812	0.0387585	0.613993
TCONS_00164686	Ldlrad1-OT1	ENSRNOG00000037795	Ldlrad1	5:126812187-126813466	0.095183	0	5.98456	0.0389138	0.615644
TCONS_00220980	ENSRNOG00000032991-AS1	XLOC_148968	XLOC_148968	9:81414008-81422073	0	0.110114	-8.70486	0.039064	0.61733
TCONS_00179006	LINC3256	XLOC_120721	XLOC_120721	6:103218153-103219081	0	0.104556	-5.62964	0.0390717	0.61733
TCONS_00189701	LINC3511	XLOC_128177	XLOC_128177	7:63304036-63310132	0	0.158421	-8.82593	0.0392591	0.618812
TCONS_00190333	LINC3523	XLOC_128636	XLOC_128636	7:77288819-77289606	0.152768	0	5.87517	0.0392964	0.618892
TCONS_00067381	LINC1250	XLOC_043425	XLOC_043425	14:44100049-44106948	0.150822	0	8.84173	0.0395442	0.621331
TCONS_00000311	LINC18	XLOC_000208	XLOC_000208	1:8504404-8505688	0.201625	0	6.90268	0.0398222	0.623644
TCONS_00004046	LINC75	XLOC_002523	XLOC_002523	1:87233972-87238364	0.0497017	0	6.71843	0.0398513	0.623715
TCONS_00078488	LINC1431	XLOC_051333	XLOC_051333	16:10460910-10462782	0	0.113907	-6.63952	0.039941	0.624714
TCONS_00080198	LINC1472	XLOC_052499	XLOC_052499	16:63471491-63476124	0	0.197144	-8.70597	0.0399776	0.624891
ENSRNOT00000079820	AC099449.1-201	ENSRNOG00000056268	AC099449.1	1:215908373-215986959	0	0.0115433	-8.69627	0.0400309	0.624891
TCONS_00042277	LINC751	XLOC_026629	XLOC_026629	11:58783177-58792689	0.10662	0	8.82542	0.0400432	0.624891
TCONS_00171511	ENSRNOG00000037710-AS1	XLOC_115553	XLOC_115553	5:128889669-128903321	0	0.0681203	-8.76674	0.040166	0.625795
TCONS_00084930	LINC1548	XLOC_055740	XLOC_055740	17:5640410-5642191	0.137951	0	6.81363	0.0401812	0.62583
TCONS_00089666	LINC1671	XLOC_059079	XLOC_059079	17:10320096-10321241	0	0.237129	-6.99964	0.0403476	0.627581
TCONS_00169030	LINC3104	XLOC_113780	XLOC_113780	5:47398881-47401856	0	0.0909597	-6.99964	0.0403588	0.627581
ENSRNOT00000092667	Phf1-206	ENSRNOG00000000480	Phf1	20:5526999-5531941	0.184255	0	8.79809	0.0403641	0.627581
TCONS_00063527	ENSRNOG00000024634-AS1	XLOC_040675	XLOC_040675	14:64479294-64489048	0.102319	0	8.80009	0.0403849	0.627581
ENSRNOT00000085794	AABR07058788.4-201	ENSRNOG00000058206	AABR07058788.4	7:137515388-137526685	0.080257	0	8.78975	0.0405241	0.629136
TCONS_00011717	Lgi1-OT1	ENSRNOG00000014758	Lgi1	1:256955652-256957101	0.0146587	0.341242	-4.0765	0.040868	0.63264
TCONS_00137499	ENSRNOG00000042101-AS1	XLOC_092322	XLOC_092322	3:165693437-165707990	0	0.0623337	-8.73621	0.0410408	0.634906
TCONS_00153151	Klrb1c-OT1	ENSRNOG00000007811	Klrb1c	4:162541751-162553705	0.082092	0	8.77431	0.0411034	0.635466
TCONS_00146857	ENSRNOG00000010453-AS2	XLOC_098507	XLOC_098507	4:7580998-7582189	0.0519073	1.44711	-4.74035	0.041279	0.636902
TCONS_00054348	LINC997	XLOC_034168	XLOC_034168	13:53584836-53586303	0.201698	0	7.0763	0.0414746	0.638338
TCONS_00016785	ENSRNOG00000018885-AS1	XLOC_010758	XLOC_010758	1:84576110-84584744	0	0.095085	-8.59318	0.0415357	0.638698
TCONS_00092384	LINC1726	XLOC_061100	XLOC_061100	17:70080420-70143434	0.0881697	0.000361667	7.57227	0.0415992	0.638868
TCONS_00116774	ENSRNOG00000054426-AS1	XLOC_078303	XLOC_078303	2:94519734-94527010	0.131942	0	8.74806	0.0416016	0.638868
TCONS_00100186	LINC1870	XLOC_066643	XLOC_066643	19:11023240-11030199	0.0126517	0.216583	-4.02704	0.0416019	0.638868
TCONS_00142175	ENSRNOG00000008510-AS1	XLOC_095354	XLOC_095354	3:93646021-93653079	0.136033	0	8.74806	0.0416151	0.638868
TCONS_00182765	LINC3343	XLOC_123333	XLOC_123333	6:30562285-30563810	0	0.195982	-7.11562	0.0416732	0.639406
TCONS_00184099	LINC3381	XLOC_124393	XLOC_124393	6:75623286-75624786	0	0.143985	-6.70641	0.041959	0.641865
TCONS_00047700	LINC883	XLOC_030289	XLOC_030289	12:6921746-6924237	0	0.091646	-6.74788	0.0419969	0.641865
TCONS_00011259	Rcl1-OT2	ENSRNOG00000015491	Rcl1	1:247291332-247305693	0.0601603	0	8.7212	0.0422502	0.643735
TCONS_00098189	LINC1834	XLOC_065187	XLOC_065187	18:43825767-43828509	0	0.0720817	-6.57439	0.0422528	0.643735
TCONS_00100799	RGD1306072-OT1	ENSRNOG00000025796	RGD1306072	19:25262076-25270764	0	0.0928467	-8.56613	0.0423919	0.645103
ENSRNOT00000079870	AABR07019254.2-201	ENSRNOG00000060194	AABR07019254.2	15:96790502-96817727	0.034389	0	8.71229	0.0424848	0.645977
TCONS_00039212	LINC670	XLOC_024593	XLOC_024593	10:93687894-93734729	0.073001	0.001173	5.98028	0.0426713	0.648469
TCONS_00021397	ENSRNOG00000016978-AS2	XLOC_013787	XLOC_013787	1:198528778-198531120	0.00165233	0.127706	-5.31738	0.0426883	0.648523
TCONS_00193293	ENSRNOG00000056338-AS1	XLOC_130584	XLOC_130584	7:141565008-141586071	0	0.037503	-8.53856	0.0427829	0.649509
TCONS_00000261	Adat2-OT1	ENSRNOG00000046983	Adat2	1:7740015-7745842	0	0.14282	-8.57458	0.0430476	0.652695
TCONS_00032253	ENSRNOG00000003280-AS1	XLOC_020276	XLOC_020276	10:103798866-103800463	0.13079	0	6.58703	0.0430664	0.652695
TCONS_00032176	ENSRNOG00000024711-AS1	XLOC_020221	XLOC_020221	10:102457174-102475122	0.0516823	0	8.6826	0.0430699	0.652695
TCONS_00092179	LINC1719	XLOC_060944	XLOC_060944	17:63100718-63109851	0	0.0931557	-8.64054	0.04314	0.65278
TCONS_00226612	LINC4206	XLOC_153180	XLOC_153180	X:105857865-105863797	0	0.140017	-8.56396	0.0433166	0.655175
TCONS_00005536	LINC104	XLOC_003455	XLOC_003455	1:127151160-127162951	0.0760667	0	8.6475	0.0438323	0.661521
TCONS_00013870	LINC222	XLOC_008818	XLOC_008818	1:22282214-22286795	0	0.0432947	-6.54664	0.0438856	0.661547
TCONS_00189827	LINC3513	XLOC_128268	XLOC_128268	7:67316504-67323748	0	0.114415	-8.60718	0.0439855	0.662292
ENSRNOT00000077836	AABR07041411.1-201	ENSRNOG00000059746	AABR07041411.1	X:129223138-129336004	0	0.007351	-8.60718	0.0439933	0.662292
TCONS_00182908	LINC3349	XLOC_123452	XLOC_123452	6:35786704-35788025	0.197468	0.00738867	4.35609	0.0441447	0.663755
TCONS_00204261	ENSRNOG00000005934-AS1	XLOC_137934	XLOC_137934	8:84506079-84514639	0.0949557	0	8.63066	0.0442285	0.664225
ENSRNOT00000078623	AABR07035868.1-201	ENSRNOG00000056105	AABR07035868.1	12:26242249-26246257	0.0518937	0	6.61967	0.0443385	0.665201
TCONS_00086965	ENSRNOG00000054964-AS2	XLOC_057097	XLOC_057097	17:46017538-46022364	0.0427547	0	6.55058	0.0444036	0.665557
ENSRNOT00000087948	AABR07035782.1-201	ENSRNOG00000057201	AABR07035782.1	12:22380027-22389456	0.0210063	0.320529	-3.85545	0.044769	0.669991
TCONS_00141680	LINC2640	XLOC_095023	XLOC_095023	3:79475016-79482945	0.00944	0.241159	-4.66233	0.0449107	0.671184
TCONS_00115451	LINC2178	XLOC_077289	XLOC_077289	2:37765374-37773393	0	0.092924	-8.45256	0.0450107	0.671939
TCONS_00080606	LINC1481	XLOC_052780	XLOC_052780	16:73890957-73895321	0	0.182091	-8.49854	0.0451293	0.673309
ENSRNOT00000092735	AABR07058170.1-201	ENSRNOG00000062139	AABR07058170.1	7:103300950-103375803	0.0116953	0	8.59594	0.0451946	0.67367
ENSRNOT00000078400	LOC100909609-201	ENSRNOG00000057633	LOC100909609	1:206527987-206573249	0.441234	0.002719	7.18586	0.0452068	0.67367
ENSRNOT00000086499	AABR07015966.1-201	ENSRNOG00000055092	AABR07015966.1	14:88183993-88221984	0	0.0205707	-8.47606	0.0454361	0.676194
TCONS_00202124	ENSRNOG00000032364-AS6	XLOC_136552	XLOC_136552	8:46740605-46765447	0.00360033	0.072375	-4.13521	0.0455608	0.677152
TCONS_00156870	LINC2897	XLOC_105526	XLOC_105526	4:81082935-81087709	0	0.161417	-8.46469	0.0457547	0.679047
TCONS_00171789	ENSRNOG00000049874-AS1	XLOC_115780	XLOC_115780	5:135025869-135032396	0	0.111375	-8.42271	0.0458591	0.679341
TCONS_00178574	LINC3242	XLOC_120377	XLOC_120377	6:97215763-97217081	0.170801	0	6.70341	0.0459567	0.680577
TCONS_00050695	LINC929	XLOC_031979	XLOC_031979	12:8840494-8841417	0.925875	0	8.56585	0.0460821	0.681716
ENSRNOT00000085839	AABR07027870.2-201	ENSRNOG00000061816	AABR07027870.2	17:47710212-47713383	0.270974	0	8.56585	0.0460901	0.681716
TCONS_00030913	ENSRNOG00000023095-AS1	XLOC_019456	XLOC_019456	10:85136763-85143439	0.127904	0	8.56585	0.0460902	0.681716
ENSRNOT00000085686	AABR07052347.1-201	ENSRNOG00000059316	AABR07052347.1	3:48411212-48413366	0	0.0888267	-6.5405	0.0461422	0.682276
ENSRNOT00000087878	AABR07067871.2-201	ENSRNOG00000059971	AABR07067871.2	9:69756405-69770510	0.0595163	0	8.54957	0.0461919	0.682592
TCONS_00212750	ENSRNOG00000004104-AS1	XLOC_143591	XLOC_143591	8:131939671-131947289	0.111085	0	8.54544	0.0464177	0.684668
TCONS_00125828	LINC2388	XLOC_084495	XLOC_084495	20:41226639-41232653	0	0.129784	-8.51427	0.0466084	0.68655
ENSRNOT00000081164	AABR07032688.1-201	ENSRNOG00000061015	AABR07032688.1	18:77174668-77177605	0.067445	0	6.51042	0.0466917	0.687237
TCONS_00194401	LINC3592	XLOC_131219	XLOC_131219	7:12003817-12004967	0.009993	0.24441	-4.45603	0.0467458	0.687622
TCONS_00038926	Ppy-OT1	ENSRNOG00000020874	Ppy	10:90041591-90046947	0.141808	0	8.53406	0.0468192	0.687919
ENSRNOT00000086466	AABR07051882.2-201	ENSRNOG00000060195	AABR07051882.2	3:25356607-25414908	0.0143803	0	8.53513	0.0468303	0.687919
TCONS_00168580	LINC3094	XLOC_113470	XLOC_113470	5:19228169-19235269	0.106071	0	8.52404	0.047046	0.689712
TCONS_00016026	ENSRNOG00000016608-AS1	XLOC_010392	XLOC_010392	1:72399156-72399971	0.238232	0	6.59513	0.0473419	0.692249
TCONS_00159167	LINC2938	XLOC_107160	XLOC_107160	4:148913462-148920506	0.026704	0	6.42117	0.0473627	0.692249
TCONS_00142292	ENSRNOG00000004863-AS1	XLOC_095433	XLOC_095433	3:97804791-97813278	0	0.088429	-8.46547	0.0476396	0.695663
[truncated: 24 more rows]

## Sheet: Dex_14d_vs_Control_14d. lncRNA
transcript_id	transcript_name	gene_id	gene_name	transcript_locus	Dex_14d_FPKM	Control_14d_FPKM	log2FoldChange	pvalue	padj
[truncated: 880 more rows]

[truncated: 4 more sheets: Dex_7d_vs_Control_7d. miRNA, Dex_14d_vs_Control_14d. miRNA, Dex_7d_vs_Control_7d. circiRNA, Dex_14d_vs_Control_14d. circRNA]
