# Supplementary material for: Transcription analyses of differentially expressed mRNAs, lncRNAs, circRNAs, and miRNAs in the growth plate of rats with glucocorticoid-induced growth retardation
Source: PeerJ. 2023 Jan 16;11:e14603. doi: 10.7717/peerj.14603 (PMC9851049; doi:10.7717/peerj.14603)
Supplement: Supplemental Information 5 [file peerj-11-14603-s005.xlsx]

## Sheet: Resting Zone Marker Genes
gene_id	gene_name	Dex_7d_FPKM	Control_7d_FPKM	log2FoldChange	pvalue	padj	Dex_14d_FPKM	Control_14d_FPKM	log2FoldChange	pvalue	padj	Resting Zone Index
ENSRNOG00000026053	Grem1	15.2393	7.33433	1.05552	0.00080889	0.0376304	10.3787	6.19134	0.83938	0.00812929	0.196352	0.22427
ENSRNOG00000003715	Srpx2	39.7629	21.6232	0.879318	0.000469722	0.0256252	18.1118	13.3241	0.540057	0.0152095	0.301682	0.25426
ENSRNOG00000004706	Vit	27.4236	14.479	0.921964	1.88e-05	0.00185365	16.5022	12.0532	0.546501	0.00889112	0.209622	0.35045

## Sheet: Hypertrophic Zone Marker Genes
gene_id	gene_name	Dex_7d_FPKM	Control_7d_FPKM	log2FoldChange	pvalue	padj	Dex_14d_FPKM	Control_14d_FPKM	log2FoldChange	pvalue	padj	Hypertrophic Zone Index
ENSRNOG00000017976	Slco2b1	9.7198	6.62475	0.549273	0.0316491	0.430421	9.60061	7.07597	0.528479	0.0281957	0.433182	0.05279
ENSRNOG00000002158	Ibsp	546.059	294.978	0.897963	0.000398186	0.022669	620.74	264.289	1.32777	1.44e-07	2.14e-05	0.11283
ENSRNOG00000018958	Mt3	23.9723	65.9984	-1.46338	0.000330199	0.0197775	20.8073	47.5581	-1.08283	0.014342	0.28963	0.27021
ENSRNOG00000008478	Mmp13	508.667	347.798	0.548186	0.0150083	0.275285	496.246	282.433	0.915016	8.31e-05	0.00565235	0.29642
ENSRNOG00000042848	Jam2	20.9522	14.8349	0.496743	0.0423612	0.501989	17.8463	13.6833	0.485153	0.0344988	0.480938	0.2993
ENSRNOG00000007628	Ptp4a3	12.1143	24.9758	-1.0333	0.00597241	0.154754	6.6054	24.4361	-1.77789	2.82e-07	3.94e-05	0.30207
ENSRNOG00000012508	Slc39a8	17.5102	12.9537	0.434646	0.0460049	0.52758	19.4528	14.7856	0.486855	0.0215586	0.371492	0.33194
ENSRNOG00000049452	Nebl	15.5443	10.1195	0.614548	0.0239579	0.364266	12.4716	8.94714	0.552533	0.0128351	0.27072	0.36878
ENSRNOG00000046261	Acp5	911.16	637.77	0.516537	0.0381734	0.477376	850.007	573.766	0.659008	0.00264528	0.0880365	0.39989
ENSRNOG00000020425	Stim1	9.60169	15.3411	-0.69912	0.00163433	0.0632395	10.9323	17.5397	-0.522238	0.0145166	0.291779	0.40886
ENSRNOG00000033933	Stfa3	0	0.181291	-8.77574	0.00284198	0.0928561	0	0.126072	-8.15798	0.00665974	0.172258	0.41689
ENSRNOG00000014723	Cbfa2t3	3.96171	10.2723	-1.40911	2.38e-08	4.85e-06	5.68967	11.1042	-0.923515	4.1e-05	0.0031116	0.4255
ENSRNOG00000021155	Ctsk	1046.98	628.403	0.740904	0.00140191	0.0564865	835.964	373.773	1.25139	1.78e-09	3.74e-07	0.43314
ENSRNOG00000002167	Dmp1	142.699	87.7797	0.69752	0.00272649	0.0906202	126.206	75.2437	0.835345	0.00020572	0.0120997	0.4911
