# Supplementary material for: Transcription analyses of differentially expressed mRNAs, lncRNAs, circRNAs, and miRNAs in the growth plate of rats with glucocorticoid-induced growth retardation
Source: PeerJ. 2023 Jan 16;11:e14603. doi: 10.7717/peerj.14603 (PMC9851049; doi:10.7717/peerj.14603)
Supplement: Supplemental Information 6 [file peerj-11-14603-s006.xlsx]

## Sheet: 7d up KEGG
Table S6. KEGG pathway analysis of up-regulated genes in the Dex 7d group. Pathways with p values smaller than 0.05 were regarded as statistically significant enriched. Statistical test method: hypergeometric test / Fisher's exact test. FDR correction method: Benjamini and Hochberg.
KEGG_A_class	KEGG_B_class	Pathway	Input number (303)	Background number (7989)	p value	Corrected p Value	Pathway ID	Genes	K_IDs
Organismal Systems	Immune system	Complement and coagulation cascades	15	80	2.44084e-07	3.83509e-05	ko04610	ENSRNOG00000001414;ENSRNOG00000012749;ENSRNOG00000012804;ENSRNOG00000012807;ENSRNOG00000015957;ENSRNOG00000016460;ENSRNOG00000024115;ENSRNOG00000028896;ENSRNOG00000030715;ENSRNOG00000038132;ENSRNOG00000045772;ENSRNOG00000048723;ENSRNOG00000051158;ENSRNOG00000051235;ENSRNOG00000061379	K03982+K03987+K03988+K03986+K03917+K17252+K03995+K03910+K04004+K19822+K03910+K03908+K01335+K01332+K03996
Environmental Information Processing	Signaling molecules and interaction	ECM-receptor interaction	15	81	2.89441e-07	3.83509e-05	ko04512	ENSRNOG00000001249;ENSRNOG00000001254;ENSRNOG00000002158;ENSRNOG00000002667;ENSRNOG00000003304;ENSRNOG00000004912;ENSRNOG00000006025;ENSRNOG00000006569;ENSRNOG00000012471;ENSRNOG00000014288;ENSRNOG00000014297;ENSRNOG00000043167;ENSRNOG00000043451;ENSRNOG00000058111;ENSRNOG00000059507	K06238+K06238+K06253+K06246+K06248+K06487+K06244+K06591+K04659+K05717+K16338+K06585+K06250+K06481+K06247
Environmental Information Processing	Signal transduction	PI3K-Akt signaling pathway	31	341	4.81529e-06	0.000425351	ko04151	ENSRNOG00000001249;ENSRNOG00000001254;ENSRNOG00000001312;ENSRNOG00000002158;ENSRNOG00000002428;ENSRNOG00000002667;ENSRNOG00000003304;ENSRNOG00000004332;ENSRNOG00000004912;ENSRNOG00000005854;ENSRNOG00000006025;ENSRNOG00000006569;ENSRNOG00000008622;ENSRNOG00000012471;ENSRNOG00000012826;ENSRNOG00000013656;ENSRNOG00000014288;ENSRNOG00000014597;ENSRNOG00000015654;ENSRNOG00000016050;ENSRNOG00000016182;…	K06238+K06238+K04359+K06253+K04275+K06246+K06248+K04361+K06487+K05465+K06244+K06591+K09047+K04659+K09048+K04289+K05717+K16172+K05080+K04362+K08774+K18497+K05453+K05448+K13769+K04503+K05057+K06585+K06250+K06481+K06247
Cellular Processes	Cellular community - eukaryotes	Focal adhesion	21	199	1.94931e-05	0.00129142	ko04510	ENSRNOG00000001249;ENSRNOG00000001254;ENSRNOG00000001312;ENSRNOG00000002158;ENSRNOG00000002667;ENSRNOG00000003304;ENSRNOG00000004332;ENSRNOG00000004696;ENSRNOG00000004912;ENSRNOG00000006025;ENSRNOG00000006569;ENSRNOG00000012471;ENSRNOG00000014288;ENSRNOG00000018683;ENSRNOG00000019598;ENSRNOG00000020918;ENSRNOG00000043167;ENSRNOG00000043451;ENSRNOG00000056836;ENSRNOG00000058111;ENSRNOG00000059507	K06238+K06238+K04359+K06253+K06246+K06248+K04361+K13709+K06487+K06244+K06591+K04659+K05717+K13708+K05448+K04503+K06585+K06250+K06278+K06481+K06247
Human Diseases	Infectious diseases	Human papillomavirus infection	28	347	0.000120583	0.00639092	ko05165	ENSRNOG00000001187;ENSRNOG00000001249;ENSRNOG00000001254;ENSRNOG00000001963;ENSRNOG00000002158;ENSRNOG00000002667;ENSRNOG00000003304;ENSRNOG00000004332;ENSRNOG00000004912;ENSRNOG00000006025;ENSRNOG00000006569;ENSRNOG00000006926;ENSRNOG00000008622;ENSRNOG00000012471;ENSRNOG00000012826;ENSRNOG00000013573;ENSRNOG00000014288;ENSRNOG00000019598;ENSRNOG00000020918;ENSRNOG00000021802;ENSRNOG00000025889;…	K14608+K06238+K06238+K14754+K06253+K06246+K06248+K04361+K06487+K06244+K06591+K02146+K09047+K04659+K09048+K02147+K05717+K05448+K04503+K12159+K04632+K14608+K06585+K06250+K16195+K04491+K06481+K06247
Human Diseases	Neurodegenerative diseases	Prion diseases	7	33	0.000192208	0.00848917	ko05020	ENSRNOG00000002126;ENSRNOG00000012749;ENSRNOG00000012804;ENSRNOG00000012807;ENSRNOG00000024115;ENSRNOG00000031890;ENSRNOG00000061379	K06491+K03987+K03988+K03986+K03995+K06491+K03996
Human Diseases	Cancers	Pathways in cancer	35	517	0.000546512	0.0206894	ko05200	ENSRNOG00000001312;ENSRNOG00000002428;ENSRNOG00000002667;ENSRNOG00000003999;ENSRNOG00000004332;ENSRNOG00000004810;ENSRNOG00000004912;ENSRNOG00000006003;ENSRNOG00000006025;ENSRNOG00000007036;ENSRNOG00000007284;ENSRNOG00000008292;ENSRNOG00000008332;ENSRNOG00000008658;ENSRNOG00000010219;ENSRNOG00000010997;ENSRNOG00000013017;ENSRNOG00000013656;ENSRNOG00000014117;ENSRNOG00000014288;ENSRNOG00000014751;…	K04359+K04275+K06246+K08043+K04361+K05858+K06487+K05691+K06244+K04674+K07299+K08268+K06226+K09455+K08732+K04198+K15589+K04289+K00510+K05717+K05126+K04362+K08774+K18497+K06231+K00799+K05448+K13769+K04503+K04632+K06765+K04491+K00799+K06481+K06247
Human Diseases	Cancers	Proteoglycans in cancer	18	203	0.000676045	0.022394	ko05205	ENSRNOG00000004303;ENSRNOG00000004332;ENSRNOG00000004554;ENSRNOG00000004912;ENSRNOG00000008292;ENSRNOG00000008332;ENSRNOG00000014276;ENSRNOG00000014288;ENSRNOG00000014297;ENSRNOG00000016050;ENSRNOG00000017392;ENSRNOG00000018646;ENSRNOG00000019598;ENSRNOG00000020369;ENSRNOG00000020918;ENSRNOG00000050994;ENSRNOG00000056836;ENSRNOG00000058111	K16866+K04361+K04660+K06487+K08268+K06226+K05860+K05717+K16338+K04362+K18497+K08523+K05448+K13769+K04503+K06106+K06278+K06481
Human Diseases	Immune diseases	Rheumatoid arthritis	10	85	0.00133421	0.0392851	ko05323	ENSRNOG00000005854;ENSRNOG00000006926;ENSRNOG00000007159;ENSRNOG00000009848;ENSRNOG00000013573;ENSRNOG00000018659;ENSRNOG00000019598;ENSRNOG00000021155;ENSRNOG00000029768;ENSRNOG00000046261	K05465+K02146+K14624+K05482+K02147+K05453+K05448+K01371+K14624+K14379
Environmental Information Processing	Signal transduction	Hippo signaling pathway	14	153	0.00195413	0.0412597	ko04390	ENSRNOG00000001414;ENSRNOG00000005933;ENSRNOG00000006003;ENSRNOG00000007036;ENSRNOG00000007329;ENSRNOG00000010903;ENSRNOG00000015488;ENSRNOG00000016617;ENSRNOG00000020918;ENSRNOG00000033209;ENSRNOG00000049232;ENSRNOG00000052469;ENSRNOG00000053384;ENSRNOG00000056343	K03982+K16687+K05691+K04674+K16822+K16681+K09448+K16820+K04503+K16622+K04491+K04673+K16621+K08791
Environmental Information Processing	Signaling molecules and interaction	Cell adhesion molecules (CAMs)	14	153	0.00195413	0.0412597	ko04514	ENSRNOG00000002126;ENSRNOG00000002176;ENSRNOG00000003365;ENSRNOG00000004438;ENSRNOG00000004912;ENSRNOG00000006569;ENSRNOG00000014297;ENSRNOG00000018778;ENSRNOG00000021243;ENSRNOG00000029212;ENSRNOG00000030515;ENSRNOG00000031890;ENSRNOG00000042848;ENSRNOG00000043167	K06491+K06592+K06780+K06759+K06487+K06591+K16338+K06781+K06548+K06793+K06757+K06491+K06735+K06585
Environmental Information Processing	Signal transduction	Rap1 signaling pathway	17	205	0.00197334	0.0412597	ko04015	ENSRNOG00000001312;ENSRNOG00000002428;ENSRNOG00000003999;ENSRNOG00000004165;ENSRNOG00000004332;ENSRNOG00000004810;ENSRNOG00000005854;ENSRNOG00000008428;ENSRNOG00000010219;ENSRNOG00000013656;ENSRNOG00000014276;ENSRNOG00000016050;ENSRNOG00000017392;ENSRNOG00000018051;ENSRNOG00000018659;ENSRNOG00000019598;ENSRNOG00000025889	K04359+K04275+K08043+K06070+K04361+K05858+K05465+K04145+K08732+K04289+K05860+K04362+K18497+K06082+K05453+K05448+K04632
Organismal Systems	Endocrine system	Parathyroid hormone synthesis, secretion and action	11	105	0.00202406	0.0412597	ko04928	ENSRNOG00000002265;ENSRNOG00000003999;ENSRNOG00000004332;ENSRNOG00000004810;ENSRNOG00000005708;ENSRNOG00000008478;ENSRNOG00000008622;ENSRNOG00000012826;ENSRNOG00000016050;ENSRNOG00000018646;ENSRNOG00000025889	K04612+K08043+K04361+K05858+K07996+K07994+K09047+K09048+K04362+K08523+K04632
Environmental Information Processing	Signal transduction	Hippo signaling pathway - multiple species	5	26	0.00258999	0.0490249	ko04392	ENSRNOG00000005933;ENSRNOG00000007329;ENSRNOG00000015488;ENSRNOG00000016617;ENSRNOG00000056343	K16687+K16822+K09448+K16820+K08791
Human Diseases	Cardiovascular diseases	Fluid shear stress and atherosclerosis	13	146	0.0035552	0.0628085	ko05418	ENSRNOG00000001195;ENSRNOG00000001312;ENSRNOG00000004912;ENSRNOG00000005033;ENSRNOG00000007159;ENSRNOG00000014117;ENSRNOG00000014297;ENSRNOG00000018937;ENSRNOG00000019598;ENSRNOG00000029768;ENSRNOG00000049964;ENSRNOG00000052469;ENSRNOG00000056836	K04973+K04359+K06487+K04675+K14624+K00510+K16338+K00799+K05448+K14624+K00799+K04673+K06278
Metabolism	Metabolism of cofactors and vitamins	Riboflavin metabolism	3	9	0.00382702	0.0633851	ko00740	ENSRNOG00000013791;ENSRNOG00000013994;ENSRNOG00000046261	K01513+K01513+K14379
Organismal Systems	Environmental adaptation	Circadian rhythm	5	29	0.00426086	0.0664194	ko04710	ENSRNOG00000007152;ENSRNOG00000009329;ENSRNOG00000018413;ENSRNOG00000027145;ENSRNOG00000048961	K03729+K03728+K21945+K08532+K03730
Environmental Information Processing	Signal transduction	Hedgehog signaling pathway	6	43	0.00528714	0.0732262	ko04340	ENSRNOG00000002041;ENSRNOG00000007025;ENSRNOG00000008332;ENSRNOG00000011789;ENSRNOG00000018268;ENSRNOG00000020918	K20020+K19608+K06226+K20033+K06231+K04503
Human Diseases	Cardiovascular diseases	Arrhythmogenic right ventricular cardiomyopathy (ARVC)	8	72	0.00566442	0.0732262	ko05412	ENSRNOG00000002372;ENSRNOG00000004912;ENSRNOG00000006003;ENSRNOG00000006569;ENSRNOG00000008479;ENSRNOG00000043167;ENSRNOG00000049232;ENSRNOG00000058111	K12563+K06487+K05691+K06591+K05849+K06585+K04491+K06481
Cellular Processes	Cellular community - eukaryotes	Adherens junction	8	72	0.00566442	0.0732262	ko04520	ENSRNOG00000002176;ENSRNOG00000004332;ENSRNOG00000006003;ENSRNOG00000007036;ENSRNOG00000015658;ENSRNOG00000016050;ENSRNOG00000018051;ENSRNOG00000049232	K06592+K04361+K05691+K04674+K06086+K04362+K06082+K04491
Metabolism	Glycan biosynthesis and metabolism	Glycosaminoglycan biosynthesis - chondroitin sulfate / dermatan sulfate	4	20	0.00607327	0.0732262	ko00532	ENSRNOG00000000824;ENSRNOG00000014713;ENSRNOG00000050152;ENSRNOG00000056658	K01794+K00746+K13499+K00771
Organismal Systems	Endocrine system	Thyroid hormone synthesis	8	73	0.00615796	0.0732262	ko04918	ENSRNOG00000003999;ENSRNOG00000004810;ENSRNOG00000008622;ENSRNOG00000010461;ENSRNOG00000012826;ENSRNOG00000025889;ENSRNOG00000030726;ENSRNOG00000052564	K08043+K05858+K09047+K00432+K09048+K04632+K10064+K00432
Cellular Processes	Cell motility	Regulation of actin cytoskeleton	16	211	0.00635548	0.0732262	ko04810	ENSRNOG00000001312;ENSRNOG00000002428;ENSRNOG00000004332;ENSRNOG00000004498;ENSRNOG00000004912;ENSRNOG00000006569;ENSRNOG00000007518;ENSRNOG00000013656;ENSRNOG00000014288;ENSRNOG00000016050;ENSRNOG00000017392;ENSRNOG00000018683;ENSRNOG00000018991;ENSRNOG00000043167;ENSRNOG00000046639;ENSRNOG00000058111	K04359+K04275+K04361+K05768+K06487+K06591+K05750+K04289+K05717+K04362+K18497+K13708+K05768+K06585+K06524+K06481
Human Diseases	Substance dependence	Cocaine addiction	6	48	0.00908942	0.100362	ko05030	ENSRNOG00000005519;ENSRNOG00000008428;ENSRNOG00000008622;ENSRNOG00000012826;ENSRNOG00000025889;ENSRNOG00000028404	K04605+K04145+K09047+K09048+K04632+K15494
Environmental Information Processing	Signal transduction	Phospholipase D signaling pathway	12	147	0.00986202	0.104537	ko04072	ENSRNOG00000001312;ENSRNOG00000002428;ENSRNOG00000003999;ENSRNOG00000004332;ENSRNOG00000004810;ENSRNOG00000005519;ENSRNOG00000008116;ENSRNOG00000010219;ENSRNOG00000013656;ENSRNOG00000025889;ENSRNOG00000026705;ENSRNOG00000033835	K04359+K04275+K08043+K04361+K05858+K04605+K01080+K08732+K04289+K04632+K00901+K01528
Cellular Processes	Transport and catabolism	Phagosome	13	167	0.0108034	0.108478	ko04145	ENSRNOG00000000164;ENSRNOG00000004912;ENSRNOG00000006548;ENSRNOG00000006926;ENSRNOG00000012471;ENSRNOG00000012779;ENSRNOG00000013573;ENSRNOG00000016366;ENSRNOG00000018251;ENSRNOG00000018371;ENSRNOG00000021157;ENSRNOG00000021681;ENSRNOG00000058111	K06528+K06487+K06560+K02146+K04659+K06558+K02147+K10062+K06560+K07375+K01368+K12478+K06481
Human Diseases	Infectious diseases	Staphylococcus aureus infection	6	50	0.0110524	0.108478	ko05150	ENSRNOG00000012749;ENSRNOG00000012804;ENSRNOG00000012807;ENSRNOG00000030715;ENSRNOG00000051158;ENSRNOG00000051235	K03987+K03988+K03986+K04004+K01335+K01332
Environmental Information Processing	Signaling molecules and interaction	Cytokine-cytokine receptor interaction	18	265	0.0118389	0.112047	ko04060	ENSRNOG00000000239;ENSRNOG00000002381;ENSRNOG00000005033;ENSRNOG00000006715;ENSRNOG00000007036;ENSRNOG00000007159;ENSRNOG00000008336;ENSRNOG00000009848;ENSRNOG00000015654;ENSRNOG00000018659;ENSRNOG00000019622;ENSRNOG00000022256;ENSRNOG00000029768;ENSRNOG00000032973;ENSRNOG00000033192;ENSRNOG00000033209;ENSRNOG00000052469;ENSRNOG00000053384	K05509+K05496+K04675+K04176+K04674+K14624+K05148+K05482+K05080+K05453+K04304+K12671+K14624+K05077+K05057+K16622+K04673+K16621
Human Diseases	Endocrine and metabolic diseases	AGE-RAGE signaling pathway in diabetic complications	9	101	0.0141794	0.123156	ko04933	ENSRNOG00000001414;ENSRNOG00000004810;ENSRNOG00000007036;ENSRNOG00000007159;ENSRNOG00000014276;ENSRNOG00000014288;ENSRNOG00000019598;ENSRNOG00000020918;ENSRNOG00000029768	K03982+K05858+K04674+K14624+K05860+K05717+K05448+K04503+K14624
Environmental Information Processing	Signal transduction	HIF-1 signaling pathway	9	101	0.0141794	0.123156	ko04066	ENSRNOG00000001414;ENSRNOG00000004332;ENSRNOG00000005854;ENSRNOG00000007284;ENSRNOG00000008292;ENSRNOG00000013141;ENSRNOG00000014117;ENSRNOG00000018911;ENSRNOG00000019598	K03982+K04361+K05465+K07299+K08268+K01689+K00510+K01103+K05448
Metabolism	Glycan biosynthesis and metabolism	Glycosaminoglycan biosynthesis - keratan sulfate	3	14	0.014407	0.123156	ko00533	ENSRNOG00000003114;ENSRNOG00000016953;ENSRNOG00000019843	K07969+K04746+K00781
Organismal Systems	Development	Axon guidance	13	175	0.0155251	0.124321	ko04360	ENSRNOG00000002024;ENSRNOG00000002041;ENSRNOG00000005573;ENSRNOG00000006526;ENSRNOG00000006631;ENSRNOG00000007202;ENSRNOG00000008332;ENSRNOG00000011977;ENSRNOG00000013213;ENSRNOG00000023337;ENSRNOG00000029071;ENSRNOG00000033099;ENSRNOG00000053384	K05106+K20020+K06845+K06840+K06840+K06840+K06226+K06841+K05105+K06840+K07521+K06765+K16621
Metabolism	Glycan biosynthesis and metabolism	Mucin type O-glycan biosynthesis	4	26	0.015682	0.124321	ko00512	ENSRNOG00000004589;ENSRNOG00000007951;ENSRNOG00000017021;ENSRNOG00000024435	K00710+K00710+K00710+K00710
Environmental Information Processing	Signal transduction	TGF-beta signaling pathway	8	86	0.0159507	0.124321	ko04350	ENSRNOG00000004554;ENSRNOG00000005033;ENSRNOG00000007036;ENSRNOG00000009173;ENSRNOG00000027183;ENSRNOG00000033209;ENSRNOG00000052469;ENSRNOG00000053384	K04660+K04675+K04674+K04677+K04679+K16622+K04673+K16621
Human Diseases	Infectious diseases	Chagas disease (American trypanosomiasis)	9	104	0.0169154	0.125198	ko05142	ENSRNOG00000001414;ENSRNOG00000004810;ENSRNOG00000007036;ENSRNOG00000007159;ENSRNOG00000012749;ENSRNOG00000012804;ENSRNOG00000012807;ENSRNOG00000025889;ENSRNOG00000029768	K03982+K05858+K04674+K14624+K03987+K03988+K03986+K04632+K14624
Cellular Processes	Cellular community - eukaryotes	Gap junction	8	87	0.017008	0.125198	ko04540	ENSRNOG00000001312;ENSRNOG00000003999;ENSRNOG00000004332;ENSRNOG00000004810;ENSRNOG00000008428;ENSRNOG00000013656;ENSRNOG00000018371;ENSRNOG00000025889	K04359+K08043+K04361+K05858+K04145+K04289+K07375+K04632
Human Diseases	Cardiovascular diseases	Dilated cardiomyopathy (DCM)	8	89	0.0192726	0.138034	ko05414	ENSRNOG00000002372;ENSRNOG00000003999;ENSRNOG00000004912;ENSRNOG00000006569;ENSRNOG00000008479;ENSRNOG00000025889;ENSRNOG00000043167;ENSRNOG00000058111	K12563+K08043+K06487+K06591+K05849+K04632+K06585+K06481
Metabolism	Glycan biosynthesis and metabolism	Glycosphingolipid biosynthesis - lacto and neolacto series	4	28	0.0202461	0.14119	ko00601	ENSRNOG00000003114;ENSRNOG00000008475;ENSRNOG00000012019;ENSRNOG00000019843	K07969+K03663+K00719+K00781
Metabolism	Metabolism of cofactors and vitamins	Pantothenate and CoA biosynthesis	3	17	0.0247519	0.168186	ko00770	ENSRNOG00000013791;ENSRNOG00000013994;ENSRNOG00000017105	K01513+K01513+K00207
Organismal Systems	Endocrine system	Relaxin signaling pathway	10	130	0.0256553	0.169966	ko04926	ENSRNOG00000003999;ENSRNOG00000004332;ENSRNOG00000004810;ENSRNOG00000007036;ENSRNOG00000008478;ENSRNOG00000008622;ENSRNOG00000010997;ENSRNOG00000012826;ENSRNOG00000019598;ENSRNOG00000025889	K08043+K04361+K05858+K04674+K07994+K09047+K04198+K09048+K05448+K04632
Human Diseases	Cancers	Prostate cancer	8	95	0.0273472	0.176756	ko05215	ENSRNOG00000001312;ENSRNOG00000004332;ENSRNOG00000008622;ENSRNOG00000012826;ENSRNOG00000016050;ENSRNOG00000016182;ENSRNOG00000020918;ENSRNOG00000049232	K04359+K04361+K09047+K09048+K04362+K08774+K04503+K04491
Organismal Systems	Endocrine system	Thyroid hormone signaling pathway	9	114	0.0288275	0.181062	ko04919	ENSRNOG00000002832;ENSRNOG00000004810;ENSRNOG00000004912;ENSRNOG00000006649;ENSRNOG00000007284;ENSRNOG00000008292;ENSRNOG00000014276;ENSRNOG00000020918;ENSRNOG00000061237	K08231+K05858+K06487+K08362+K07299+K08268+K05860+K04503+K01562
Human Diseases	Cancers	Central carbon metabolism in cancer	6	62	0.0293798	0.181062	ko05230	ENSRNOG00000004332;ENSRNOG00000007284;ENSRNOG00000008292;ENSRNOG00000014751;ENSRNOG00000016050;ENSRNOG00000056246	K04361+K07299+K08268+K05126+K04362+K01425
Organismal Systems	Endocrine system	Cortisol synthesis and secretion	6	63	0.0314784	0.182123	ko04927	ENSRNOG00000003999;ENSRNOG00000004693;ENSRNOG00000004810;ENSRNOG00000008622;ENSRNOG00000012826;ENSRNOG00000025889	K08043+K09355+K05858+K09047+K09048+K04632
Metabolism	Metabolism of other amino acids	Glutathione metabolism	6	63	0.0314784	0.182123	ko00480	ENSRNOG00000006583;ENSRNOG00000010461;ENSRNOG00000018937;ENSRNOG00000024788;ENSRNOG00000049964;ENSRNOG00000052564	K04097+K00432+K00799+K01581+K00799+K00432
Metabolism	Metabolism of cofactors and vitamins	Nicotinate and nicotinamide metabolism	4	32	0.0316138	0.182123	ko00760	ENSRNOG00000013791;ENSRNOG00000013994;ENSRNOG00000015354;ENSRNOG00000062125	K01513+K01513+K00157+K00157
Organismal Systems	Digestive system	Cholesterol metabolism	5	49	0.0370967	0.207541	ko04979	ENSRNOG00000007545;ENSRNOG00000016488;ENSRNOG00000018454;ENSRNOG00000018694;ENSRNOG00000020713	K08767+K08761+K04524+K22284+K20464
Human Diseases	Infectious diseases	Influenza A	11	158	0.0375924	0.207541	ko05164	ENSRNOG00000001369;ENSRNOG00000001963;ENSRNOG00000006384;ENSRNOG00000007159;ENSRNOG00000009848;ENSRNOG00000013203;ENSRNOG00000017414;ENSRNOG00000022256;ENSRNOG00000029768;ENSRNOG00000048315;ENSRNOG00000049282	K14216+K14754+K12646+K14624+K05482+K01312+K09447+K12671+K14624+K16195+K14216
Environmental Information Processing	Signal transduction	AMPK signaling pathway	9	122	0.0418708	0.22198	ko04152	ENSRNOG00000008622;ENSRNOG00000012826;ENSRNOG00000013552;ENSRNOG00000014597;ENSRNOG00000017637;ENSRNOG00000018911;ENSRNOG00000020918;ENSRNOG00000034013;ENSRNOG00000045636	K09047+K09048+K00507+K16172+K03841+K01103+K04503+K11262+K00665
Human Diseases	Cancers	Colorectal cancer	7	85	0.041883	0.22198	ko05210	ENSRNOG00000004332;ENSRNOG00000007036;ENSRNOG00000010219;ENSRNOG00000016182;ENSRNOG00000020918;ENSRNOG00000033099;ENSRNOG00000049232	K04361+K04674+K08732+K08774+K04503+K06765+K04491
Human Diseases	Endocrine and metabolic diseases	Insulin resistance	8	104	0.0434427	0.225732	ko04931	ENSRNOG00000002810;ENSRNOG00000007284;ENSRNOG00000007319;ENSRNOG00000008622;ENSRNOG00000011474;ENSRNOG00000012826;ENSRNOG00000014597;ENSRNOG00000018494	K00820+K07299+K19518+K09047+K07189+K09048+K16172+K07189
Metabolism	Global and overview maps	Metabolic pathways	60	1285	0.0457873	0.230578	ko01100	ENSRNOG00000000824;ENSRNOG00000002051;ENSRNOG00000002643;ENSRNOG00000002810;ENSRNOG00000002926;ENSRNOG00000003114;ENSRNOG00000004443;ENSRNOG00000004448;ENSRNOG00000004589;ENSRNOG00000004810;ENSRNOG00000006583;ENSRNOG00000006926;ENSRNOG00000007951;ENSRNOG00000008079;ENSRNOG00000008116;ENSRNOG00000008475;ENSRNOG00000009577;ENSRNOG00000009715;ENSRNOG00000010468;ENSRNOG00000011068;ENSRNOG00000011150;…	K01794+K20279+K00012+K00820+K00972+K07969+K00654+K01908+K00710+K05858+K04097+K02146+K00710+K00963+K01080+K03663+K02579+K00029+K10203+K13811+K01135+K18083+K00719+K01689+K02147+K01513+K01513+K00510+K05860+K00746+K00157+K01044+K01641+K00710+K00207+K00472+K03841+K22284+K00781+K00923+K01197+K07413+K00710+K01581+K01062+K00901+K00894+K11262+K00665+K14286+K14379+K07424+K13499+K00472+K00276+K01425+K00771+…
Human Diseases	Cancers	Melanoma	6	69	0.0461156	0.230578	ko05218	ENSRNOG00000001312;ENSRNOG00000004332;ENSRNOG00000008658;ENSRNOG00000016050;ENSRNOG00000017392;ENSRNOG00000020918	K04359+K04361+K09455+K04362+K18497+K04503

## Sheet: 7d down KEGG
Table S6. KEGG pathway analysis of down-regulated genes in the Dex 7d group. Pathways with p values smaller than 0.05 were regarded as statistically significant enriched. Statistical test method: hypergeometric test / Fisher's exact test. FDR correction method: Benjamini and Hochberg.
KEGG_A_class	KEGG_B_class	Pathway	Input number (378)	Background number (7989)	p value	Corrected p Value	Pathway ID	Genes	K_IDs
Human Diseases	Immune diseases	Systemic lupus erythematosus	33	115	9.83749e-18	2.76434e-15	ko05322	ENSRNOG00000000454;ENSRNOG00000010386;ENSRNOG00000011523;ENSRNOG00000020647;ENSRNOG00000021198;ENSRNOG00000026762;ENSRNOG00000028975;ENSRNOG00000032844;ENSRNOG00000033215;ENSRNOG00000033685;ENSRNOG00000045644;ENSRNOG00000045646;ENSRNOG00000045840;ENSRNOG00000046434;ENSRNOG00000046834;ENSRNOG00000048215;ENSRNOG00000049198;ENSRNOG00000049649;ENSRNOG00000050478;ENSRNOG00000051758;ENSRNOG00000052555;…	K06752+K11251+K11251+K01319+K11252+K06752+K11254+K06752+K06752+K01327+K11254+K11254+K11254+K11253+K03990+K11254+K11254+K11251+K11254+K11251+K11251+K11251+K11254+K11252+K11254+K11252+K11253+K11251+K11251+K11254+K11251+K11252+K11254
Organismal Systems	Immune system	B cell receptor signaling pathway	23	70	4.01484e-14	5.64085e-12	ko04662	ENSRNOG00000007350;ENSRNOG00000007422;ENSRNOG00000008180;ENSRNOG00000011917;ENSRNOG00000012061;ENSRNOG00000012160;ENSRNOG00000013309;ENSRNOG00000013967;ENSRNOG00000014294;ENSRNOG00000016846;ENSRNOG00000017020;ENSRNOG00000017181;ENSRNOG00000017485;ENSRNOG00000018311;ENSRNOG00000020125;ENSRNOG00000023258;ENSRNOG00000024000;ENSRNOG00000034164;ENSRNOG00000046452;ENSRNOG00000049925;ENSRNOG00000050430;…	K07860+K05730+K05854+K06507+K19662+K05855+K12230+K07371+K05697+K00922+K03084+K07369+K06504+K06465+K06506+K02580+K06467+K04012+K12560+K06506+K05730+K05859+K07370
Human Diseases	Immune diseases	Primary immunodeficiency	16	38	3.95165e-12	3.70138e-10	ko05340	ENSRNOG00000000655;ENSRNOG00000002304;ENSRNOG00000002659;ENSRNOG00000003954;ENSRNOG00000004623;ENSRNOG00000004630;ENSRNOG00000007664;ENSRNOG00000009705;ENSRNOG00000013967;ENSRNOG00000015994;ENSRNOG00000018311;ENSRNOG00000018669;ENSRNOG00000020125;ENSRNOG00000049925;ENSRNOG00000052407;ENSRNOG00000058446	K06478+K05150+K08060+K05070+K10988+K10628+K05151+K05856+K07371+K06450+K06465+K11218+K06506+K06506+K07370+K05072
Organismal Systems	Immune system	Hematopoietic cell lineage	22	88	6.61298e-11	4.64562e-09	ko04640	ENSRNOG00000000321;ENSRNOG00000000454;ENSRNOG00000003069;ENSRNOG00000005954;ENSRNOG00000013615;ENSRNOG00000015441;ENSRNOG00000015945;ENSRNOG00000015994;ENSRNOG00000018311;ENSRNOG00000020699;ENSRNOG00000020872;ENSRNOG00000020945;ENSRNOG00000022071;ENSRNOG00000024000;ENSRNOG00000026762;ENSRNOG00000032844;ENSRNOG00000033215;ENSRNOG00000034164;ENSRNOG00000038540;ENSRNOG00000053873;ENSRNOG00000054764;…	K06469+K06752+K01242+K05067+K00977+K05071+K06452+K06450+K06465+K06475+K06455+K06466+K06476+K06467+K06752+K06752+K06752+K04012+K06260+K06455+K05092+K05072
Human Diseases	Substance dependence	Alcoholism	27	171	2.60642e-08	1.46481e-06	ko05034	ENSRNOG00000004158;ENSRNOG00000010386;ENSRNOG00000011523;ENSRNOG00000021198;ENSRNOG00000028975;ENSRNOG00000045644;ENSRNOG00000045646;ENSRNOG00000045840;ENSRNOG00000046434;ENSRNOG00000048215;ENSRNOG00000049198;ENSRNOG00000049649;ENSRNOG00000050478;ENSRNOG00000051758;ENSRNOG00000052555;ENSRNOG00000052594;ENSRNOG00000053081;ENSRNOG00000053845;ENSRNOG00000054017;ENSRNOG00000054296;ENSRNOG00000056281;…	K11409+K11251+K11251+K11252+K11254+K11254+K11254+K11254+K11253+K11254+K11254+K11251+K11254+K11251+K11251+K11251+K11254+K11252+K11254+K11252+K11253+K11251+K11251+K11254+K11251+K11252+K11254
Organismal Systems	Immune system	Fc gamma R-mediated phagocytosis	17	83	2.40755e-07	1.12754e-05	ko04666	ENSRNOG00000000655;ENSRNOG00000007350;ENSRNOG00000007422;ENSRNOG00000008180;ENSRNOG00000009331;ENSRNOG00000009805;ENSRNOG00000012061;ENSRNOG00000012160;ENSRNOG00000014317;ENSRNOG00000015603;ENSRNOG00000016846;ENSRNOG00000017020;ENSRNOG00000031058;ENSRNOG00000046452;ENSRNOG00000050430;ENSRNOG00000051986;ENSRNOG00000054371	K06478+K07860+K05730+K05854+K08893+K05748+K19662+K05855+K05754+K18050+K00922+K03084+K05747+K12560+K05730+K05859+K19663
Organismal Systems	Immune system	Leukocyte transendothelial migration	19	113	1.19411e-06	4.79348e-05	ko04670	ENSRNOG00000001224;ENSRNOG00000002540;ENSRNOG00000003622;ENSRNOG00000003866;ENSRNOG00000005342;ENSRNOG00000006604;ENSRNOG00000006940;ENSRNOG00000007350;ENSRNOG00000007422;ENSRNOG00000012061;ENSRNOG00000015733;ENSRNOG00000016846;ENSRNOG00000017980;ENSRNOG00000018524;ENSRNOG00000020726;ENSRNOG00000027839;ENSRNOG00000050430;ENSRNOG00000051986;ENSRNOG00000054371	K06464+K07873+K21421+K04189+K08015+K06514+K08012+K07860+K05730+K19662+K12757+K00922+K05718+K08007+K08013+K05871+K05730+K05859+K19663
Genetic Information Processing	Replication and repair	DNA replication	10	36	4.20217e-06	0.000147601	ko03030	ENSRNOG00000001134;ENSRNOG00000001457;ENSRNOG00000003123;ENSRNOG00000003703;ENSRNOG00000009192;ENSRNOG00000012543;ENSRNOG00000014193;ENSRNOG00000014336;ENSRNOG00000019681;ENSRNOG00000037449	K10756+K10755+K07466+K02542+K10744+K02541+K10747+K02209+K02327+K02324
Organismal Systems	Immune system	Platelet activation	19	124	5.01525e-06	0.000156587	ko04611	ENSRNOG00000005404;ENSRNOG00000008180;ENSRNOG00000009385;ENSRNOG00000012160;ENSRNOG00000015733;ENSRNOG00000016846;ENSRNOG00000017606;ENSRNOG00000017803;ENSRNOG00000019689;ENSRNOG00000020425;ENSRNOG00000020585;ENSRNOG00000021098;ENSRNOG00000021161;ENSRNOG00000022071;ENSRNOG00000026764;ENSRNOG00000038540;ENSRNOG00000047204;ENSRNOG00000051986;ENSRNOG00000052407	K04350+K05854+K21289+K05855+K12757+K00922+K05215+K17704+K03900+K16059+K04264+K12361+K17084+K06476+K16342+K06260+K06264+K05859+K07370
Human Diseases	Cancers	Viral carcinogenesis	26	214	8.25362e-06	0.000231927	ko05203	ENSRNOG00000000632;ENSRNOG00000004158;ENSRNOG00000004726;ENSRNOG00000008180;ENSRNOG00000009258;ENSRNOG00000012160;ENSRNOG00000016846;ENSRNOG00000018669;ENSRNOG00000021198;ENSRNOG00000023258;ENSRNOG00000028975;ENSRNOG00000045644;ENSRNOG00000045646;ENSRNOG00000045840;ENSRNOG00000046834;ENSRNOG00000048215;ENSRNOG00000049198;ENSRNOG00000050258;ENSRNOG00000050478;ENSRNOG00000053081;ENSRNOG00000053845;…	K02087+K11409+K04443+K05854+K02091+K05855+K00922+K11218+K11252+K02580+K11254+K11254+K11254+K11254+K03990+K11254+K11254+K10152+K11254+K11254+K11252+K11254+K11252+K11254+K11252+K11254
Human Diseases	Infectious diseases	Leishmaniasis	12	66	5.11876e-05	0.00130761	ko05140	ENSRNOG00000000454;ENSRNOG00000001224;ENSRNOG00000003622;ENSRNOG00000004639;ENSRNOG00000006940;ENSRNOG00000012061;ENSRNOG00000014294;ENSRNOG00000023258;ENSRNOG00000026762;ENSRNOG00000032844;ENSRNOG00000033215;ENSRNOG00000046834	K06752+K06464+K21421+K03175+K08012+K19662+K05697+K02580+K06752+K06752+K06752+K03990
Genetic Information Processing	Replication and repair	Mismatch repair	7	23	6.36947e-05	0.00149152	ko03430	ENSRNOG00000001134;ENSRNOG00000001457;ENSRNOG00000003123;ENSRNOG00000013673;ENSRNOG00000014193;ENSRNOG00000015796;ENSRNOG00000019681	K10756+K10755+K07466+K08736+K10747+K08735+K02327
Organismal Systems	Immune system	Intestinal immune network for IgA production	9	43	0.000145426	0.00302041	ko04672	ENSRNOG00000000454;ENSRNOG00000002304;ENSRNOG00000003866;ENSRNOG00000004405;ENSRNOG00000007664;ENSRNOG00000012208;ENSRNOG00000026762;ENSRNOG00000032844;ENSRNOG00000033215	K06752+K05150+K04189+K13073+K05151+K06590+K06752+K06752+K06752
Cellular Processes	Cell motility	Regulation of actin cytoskeleton	23	211	0.000150483	0.00302041	ko04810	ENSRNOG00000000869;ENSRNOG00000001224;ENSRNOG00000003866;ENSRNOG00000006557;ENSRNOG00000007350;ENSRNOG00000007422;ENSRNOG00000007925;ENSRNOG00000009805;ENSRNOG00000012002;ENSRNOG00000012208;ENSRNOG00000014285;ENSRNOG00000014317;ENSRNOG00000015733;ENSRNOG00000016846;ENSRNOG00000017980;ENSRNOG00000018524;ENSRNOG00000022071;ENSRNOG00000027894;ENSRNOG00000031058;ENSRNOG00000036829;ENSRNOG00000050386;…	K05729+K06464+K04189+K05749+K07860+K05730+K05735+K05748+K16848+K06590+K05766+K05754+K12757+K00922+K05718+K08007+K06476+K05767+K05747+K05750+K05759+K05730+K05086
Human Diseases	Immune diseases	Asthma	7	27	0.000195768	0.00338029	ko05310	ENSRNOG00000000454;ENSRNOG00000008394;ENSRNOG00000008707;ENSRNOG00000026762;ENSRNOG00000032844;ENSRNOG00000033215;ENSRNOG00000053457	K06752+K10786+K10788+K06752+K06752+K06752+K10787
Cellular Processes	Cell growth and death	Necroptosis	18	148	0.000202806	0.00338029	ko04217	ENSRNOG00000003084;ENSRNOG00000003622;ENSRNOG00000005731;ENSRNOG00000006695;ENSRNOG00000010386;ENSRNOG00000011523;ENSRNOG00000011589;ENSRNOG00000012439;ENSRNOG00000018669;ENSRNOG00000026764;ENSRNOG00000032948;ENSRNOG00000049649;ENSRNOG00000051758;ENSRNOG00000052555;ENSRNOG00000052594;ENSRNOG00000056411;ENSRNOG00000058437;ENSRNOG00000059748	K10798+K21421+K16060+K10630+K11251+K11251+K04515+K04726+K11218+K16342+K11219+K11251+K11251+K11251+K11251+K11251+K11251+K11251
Organismal Systems	Immune system	Th1 and Th2 cell differentiation	13	87	0.000204502	0.00338029	ko04658	ENSRNOG00000000454;ENSRNOG00000003954;ENSRNOG00000007270;ENSRNOG00000009705;ENSRNOG00000015441;ENSRNOG00000015945;ENSRNOG00000015994;ENSRNOG00000018669;ENSRNOG00000023258;ENSRNOG00000026762;ENSRNOG00000032844;ENSRNOG00000032948;ENSRNOG00000033215	K06752+K05070+K05064+K05856+K05071+K06452+K06450+K11218+K02580+K06752+K06752+K11219+K06752
Organismal Systems	Immune system	Fc epsilon RI signaling pathway	11	66	0.000235878	0.00368232	ko04664	ENSRNOG00000006612;ENSRNOG00000007350;ENSRNOG00000007422;ENSRNOG00000008180;ENSRNOG00000012160;ENSRNOG00000016846;ENSRNOG00000017020;ENSRNOG00000026764;ENSRNOG00000050430;ENSRNOG00000051986;ENSRNOG00000052407	K04432+K07860+K05730+K05854+K05855+K00922+K03084+K16342+K05730+K05859+K07370
Environmental Information Processing	Signal transduction	NF-kappa B signaling pathway	13	92	0.000360163	0.00482635	ko04064	ENSRNOG00000003084;ENSRNOG00000004639;ENSRNOG00000005731;ENSRNOG00000007664;ENSRNOG00000008180;ENSRNOG00000009705;ENSRNOG00000012061;ENSRNOG00000012160;ENSRNOG00000013967;ENSRNOG00000017181;ENSRNOG00000023258;ENSRNOG00000051986;ENSRNOG00000052407	K10798+K03175+K16060+K05151+K05854+K05856+K19662+K05855+K07371+K07369+K02580+K05859+K07370
Organismal Systems	Immune system	Th17 cell differentiation	14	104	0.000360688	0.00482635	ko04659	ENSRNOG00000000454;ENSRNOG00000003954;ENSRNOG00000009705;ENSRNOG00000015441;ENSRNOG00000015773;ENSRNOG00000015945;ENSRNOG00000015994;ENSRNOG00000018669;ENSRNOG00000023258;ENSRNOG00000026762;ENSRNOG00000032844;ENSRNOG00000032948;ENSRNOG00000033215;ENSRNOG00000061070	K06752+K05070+K05856+K05071+K05075+K06452+K06450+K11218+K02580+K06752+K06752+K11219+K06752+K09445
Organismal Systems	Immune system	T cell receptor signaling pathway	14	104	0.000360688	0.00482635	ko04660	ENSRNOG00000000655;ENSRNOG00000002278;ENSRNOG00000005404;ENSRNOG00000007422;ENSRNOG00000007925;ENSRNOG00000009705;ENSRNOG00000014294;ENSRNOG00000015945;ENSRNOG00000015994;ENSRNOG00000016378;ENSRNOG00000016846;ENSRNOG00000017181;ENSRNOG00000023258;ENSRNOG00000050430	K06478+K07364+K04350+K05730+K05735+K05856+K05697+K06452+K06450+K04415+K00922+K07369+K02580+K05730
Human Diseases	Infectious diseases	Staphylococcus aureus infection	9	50	0.000481908	0.00615528	ko05150	ENSRNOG00000000454;ENSRNOG00000000699;ENSRNOG00000001224;ENSRNOG00000017980;ENSRNOG00000026762;ENSRNOG00000032844;ENSRNOG00000033215;ENSRNOG00000046452;ENSRNOG00000046834	K06752+K06544+K06464+K05718+K06752+K06752+K06752+K12560+K03990
Human Diseases	Infectious diseases	Tuberculosis	18	166	0.000827724	0.0101126	ko05152	ENSRNOG00000000454;ENSRNOG00000001224;ENSRNOG00000002659;ENSRNOG00000004639;ENSRNOG00000011589;ENSRNOG00000012160;ENSRNOG00000012439;ENSRNOG00000017181;ENSRNOG00000018735;ENSRNOG00000019430;ENSRNOG00000020300;ENSRNOG00000023258;ENSRNOG00000026762;ENSRNOG00000032844;ENSRNOG00000033215;ENSRNOG00000046452;ENSRNOG00000046834;ENSRNOG00000048161	K06752+K06464+K08060+K03175+K04515+K05855+K04726+K07369+K06505+K13882+K14957+K02580+K06752+K06752+K06752+K12560+K03990+K10161
Organismal Systems	Immune system	Natural killer cell mediated cytotoxicity	14	118	0.00129795	0.0151968	ko04650	ENSRNOG00000001224;ENSRNOG00000007350;ENSRNOG00000007422;ENSRNOG00000009705;ENSRNOG00000012061;ENSRNOG00000012160;ENSRNOG00000012439;ENSRNOG00000014294;ENSRNOG00000016846;ENSRNOG00000017980;ENSRNOG00000027839;ENSRNOG00000050430;ENSRNOG00000051986;ENSRNOG00000054371	K06464+K07860+K05730+K05856+K19662+K05855+K04726+K05697+K00922+K05718+K05871+K05730+K05859+K19663
Human Diseases	Immune diseases	Inflammatiory bowel disease (IBD)	9	60	0.00187366	0.0210599	ko05321	ENSRNOG00000000454;ENSRNOG00000003954;ENSRNOG00000007270;ENSRNOG00000015441;ENSRNOG00000015773;ENSRNOG00000023258;ENSRNOG00000026762;ENSRNOG00000032844;ENSRNOG00000033215	K06752+K05070+K05064+K05071+K05075+K02580+K06752+K06752+K06752
Organismal Systems	Immune system	Chemokine signaling pathway	17	174	0.0035167	0.0380074	ko04062	ENSRNOG00000003866;ENSRNOG00000007350;ENSRNOG00000007422;ENSRNOG00000008180;ENSRNOG00000009331;ENSRNOG00000009912;ENSRNOG00000010665;ENSRNOG00000012061;ENSRNOG00000016278;ENSRNOG00000016846;ENSRNOG00000018669;ENSRNOG00000018985;ENSRNOG00000021098;ENSRNOG00000023258;ENSRNOG00000027839;ENSRNOG00000031058;ENSRNOG00000050430	K04189+K07860+K05730+K05854+K08893+K08891+K04182+K19662+K21083+K00922+K11218+K00910+K12361+K02580+K05871+K05747+K05730
Human Diseases	Cancers	Choline metabolism in cancer	11	95	0.00503514	0.0524027	ko05231	ENSRNOG00000001796;ENSRNOG00000007350;ENSRNOG00000009805;ENSRNOG00000012061;ENSRNOG00000016846;ENSRNOG00000017737;ENSRNOG00000022943;ENSRNOG00000023238;ENSRNOG00000026764;ENSRNOG00000031058;ENSRNOG00000054371	K00901+K07860+K05748+K19662+K00922+K00901+K00901+K00901+K16342+K05747+K19663
Genetic Information Processing	Replication and repair	Base excision repair	6	36	0.0062873	0.0626514	ko03410	ENSRNOG00000003084;ENSRNOG00000011688;ENSRNOG00000014193;ENSRNOG00000018577;ENSRNOG00000019681;ENSRNOG00000037449	K10798+K10569+K10747+K10567+K02327+K02324
Human Diseases	Infectious diseases	Measles	13	126	0.0064658	0.0626514	ko05162	ENSRNOG00000003954;ENSRNOG00000004639;ENSRNOG00000009258;ENSRNOG00000015945;ENSRNOG00000015994;ENSRNOG00000016846;ENSRNOG00000018669;ENSRNOG00000023258;ENSRNOG00000032948;ENSRNOG00000046452;ENSRNOG00000048161;ENSRNOG00000050258;ENSRNOG00000059073	K05070+K03175+K02091+K06452+K06450+K00922+K11218+K02580+K11219+K12560+K10161+K10152+K06536
Human Diseases	Infectious diseases	Epstein-Barr virus infection	18	204	0.0078743	0.0737559	ko05169	ENSRNOG00000000632;ENSRNOG00000003069;ENSRNOG00000004639;ENSRNOG00000006612;ENSRNOG00000008180;ENSRNOG00000009912;ENSRNOG00000012160;ENSRNOG00000016846;ENSRNOG00000017980;ENSRNOG00000018311;ENSRNOG00000018584;ENSRNOG00000018669;ENSRNOG00000019439;ENSRNOG00000023258;ENSRNOG00000032948;ENSRNOG00000034164;ENSRNOG00000036711;ENSRNOG00000051986	K02087+K01242+K03175+K04432+K05854+K08891+K05855+K00922+K05718+K06465+K13784+K11218+K03015+K02580+K11219+K04012+K06477+K05859
Human Diseases	Infectious diseases	HTLV-I infection	22	269	0.00847929	0.0750849	ko05166	ENSRNOG00000000454;ENSRNOG00000001224;ENSRNOG00000003954;ENSRNOG00000007664;ENSRNOG00000007906;ENSRNOG00000008941;ENSRNOG00000009705;ENSRNOG00000013177;ENSRNOG00000015945;ENSRNOG00000015994;ENSRNOG00000016846;ENSRNOG00000017980;ENSRNOG00000018669;ENSRNOG00000019681;ENSRNOG00000023258;ENSRNOG00000026762;ENSRNOG00000032844;ENSRNOG00000033215;ENSRNOG00000037449;ENSRNOG00000050258;ENSRNOG00000051499;…	K06752+K06464+K05070+K05151+K06637+K02678+K05856+K04416+K06452+K06450+K00922+K05718+K11218+K02327+K02580+K06752+K06752+K06752+K02324+K10152+K09063+K09420
Human Diseases	Infectious diseases	Bacterial invasion of epithelial cells	9	75	0.00855059	0.0750849	ko05100	ENSRNOG00000008444;ENSRNOG00000009805;ENSRNOG00000014317;ENSRNOG00000016846;ENSRNOG00000017804;ENSRNOG00000020393;ENSRNOG00000031058;ENSRNOG00000038881;ENSRNOG00000043182	K04707+K05748+K05754+K00922+K13737+K07863+K05747+K06106+K16939
Human Diseases	Cancers	Non-small cell lung cancer	8	63	0.00924526	0.0787248	ko05223	ENSRNOG00000005342;ENSRNOG00000009258;ENSRNOG00000012061;ENSRNOG00000013529;ENSRNOG00000016846;ENSRNOG00000018669;ENSRNOG00000051986;ENSRNOG00000054371	K08015+K02091+K19662+K04411+K00922+K11218+K05859+K19663
Environmental Information Processing	Signal transduction	MAPK signaling pathway	23	292	0.0110853	0.0913841	ko04010	ENSRNOG00000001138;ENSRNOG00000004003;ENSRNOG00000004639;ENSRNOG00000004726;ENSRNOG00000005404;ENSRNOG00000006612;ENSRNOG00000007350;ENSRNOG00000008031;ENSRNOG00000012061;ENSRNOG00000013177;ENSRNOG00000013529;ENSRNOG00000013862;ENSRNOG00000014061;ENSRNOG00000016378;ENSRNOG00000016810;ENSRNOG00000020505;ENSRNOG00000021061;ENSRNOG00000021098;ENSRNOG00000023258;ENSRNOG00000026764;ENSRNOG00000042411;…	K04429+K20216+K03175+K04443+K04350+K04432+K07860+K04861+K19662+K04416+K04411+K04459+K04459+K04415+K04381+K04408+K04414+K12361+K02580+K16342+K04373+K19663+K05092
Environmental Information Processing	Signal transduction	Jak-STAT signaling pathway	14	150	0.0113824	0.0913841	ko04630	ENSRNOG00000000187;ENSRNOG00000000529;ENSRNOG00000003954;ENSRNOG00000005954;ENSRNOG00000007270;ENSRNOG00000014294;ENSRNOG00000014555;ENSRNOG00000015441;ENSRNOG00000015773;ENSRNOG00000016846;ENSRNOG00000018669;ENSRNOG00000032948;ENSRNOG00000050258;ENSRNOG00000058446	K04738+K04702+K05070+K05067+K05064+K05697+K00157+K05071+K05075+K00922+K11218+K11219+K10152+K05072
Cellular Processes	Transport and catabolism	Phagosome	15	167	0.0125314	0.0973255	ko04145	ENSRNOG00000000454;ENSRNOG00000001224;ENSRNOG00000003597;ENSRNOG00000003622;ENSRNOG00000006940;ENSRNOG00000008310;ENSRNOG00000019430;ENSRNOG00000022480;ENSRNOG00000026762;ENSRNOG00000032844;ENSRNOG00000033215;ENSRNOG00000046151;ENSRNOG00000046452;ENSRNOG00000046834;ENSRNOG00000048472	K06752+K06464+K07374+K21421+K08012+K10789+K13882+K02152+K06752+K06752+K06752+K07375+K12560+K03990+K04659
Human Diseases	Infectious diseases	Toxoplasmosis	11	108	0.0129045	0.0973255	ko05145	ENSRNOG00000000454;ENSRNOG00000002659;ENSRNOG00000004639;ENSRNOG00000005731;ENSRNOG00000006612;ENSRNOG00000009385;ENSRNOG00000023258;ENSRNOG00000026762;ENSRNOG00000032844;ENSRNOG00000032948;ENSRNOG00000033215	K06752+K08060+K03175+K16060+K04432+K21289+K02580+K06752+K06752+K11219+K06752
Environmental Information Processing	Signaling molecules and interaction	Cell adhesion molecules (CAMs)	14	153	0.0133926	0.0973255	ko04514	ENSRNOG00000000454;ENSRNOG00000000655;ENSRNOG00000000699;ENSRNOG00000001224;ENSRNOG00000012208;ENSRNOG00000013694;ENSRNOG00000017980;ENSRNOG00000020884;ENSRNOG00000024000;ENSRNOG00000026762;ENSRNOG00000032844;ENSRNOG00000033215;ENSRNOG00000036711;ENSRNOG00000047574	K06752+K06478+K06544+K06464+K06590+K16359+K05718+K06456+K06467+K06752+K06752+K06752+K06477+K07377
Environmental Information Processing	Signal transduction	Calcium signaling pathway	16	184	0.0135078	0.0973255	ko04020	ENSRNOG00000001427;ENSRNOG00000003069;ENSRNOG00000003866;ENSRNOG00000008552;ENSRNOG00000011589;ENSRNOG00000012061;ENSRNOG00000014290;ENSRNOG00000016712;ENSRNOG00000017606;ENSRNOG00000017912;ENSRNOG00000020425;ENSRNOG00000020585;ENSRNOG00000027839;ENSRNOG00000051986;ENSRNOG00000054371;ENSRNOG00000055705	K16057+K01242+K04189+K05217+K04515+K19662+K04603+K04248+K05215+K05853+K16059+K04264+K05871+K05859+K19663+K04163
Organismal Systems	Development	Osteoclast differentiation	12	124	0.0141288	0.0992549	ko04380	ENSRNOG00000002278;ENSRNOG00000004639;ENSRNOG00000006940;ENSRNOG00000009705;ENSRNOG00000012160;ENSRNOG00000013967;ENSRNOG00000016846;ENSRNOG00000023258;ENSRNOG00000032948;ENSRNOG00000046452;ENSRNOG00000051986;ENSRNOG00000052407	K07364+K03175+K08012+K05856+K05855+K07371+K00922+K02580+K11219+K12560+K05859+K07370
Environmental Information Processing	Signal transduction	VEGF signaling pathway	7	57	0.0172691	0.118356	ko04370	ENSRNOG00000004726;ENSRNOG00000007350;ENSRNOG00000012061;ENSRNOG00000016846;ENSRNOG00000026764;ENSRNOG00000051986;ENSRNOG00000054371	K04443+K07860+K19662+K00922+K16342+K05859+K19663
Genetic Information Processing	Replication and repair	Nucleotide excision repair	6	45	0.0184242	0.123267	ko03420	ENSRNOG00000001134;ENSRNOG00000001457;ENSRNOG00000003123;ENSRNOG00000014193;ENSRNOG00000019681;ENSRNOG00000037449	K10756+K10755+K07466+K10747+K02327+K02324
Human Diseases	Cancers	Pathways in cancer	35	517	0.0194621	0.126547	ko05200	ENSRNOG00000000187;ENSRNOG00000000529;ENSRNOG00000003866;ENSRNOG00000003954;ENSRNOG00000004639;ENSRNOG00000005342;ENSRNOG00000005404;ENSRNOG00000005731;ENSRNOG00000005954;ENSRNOG00000007270;ENSRNOG00000007350;ENSRNOG00000008444;ENSRNOG00000008941;ENSRNOG00000009258;ENSRNOG00000010121;ENSRNOG00000011589;ENSRNOG00000012061;ENSRNOG00000012439;ENSRNOG00000013397;ENSRNOG00000013529;ENSRNOG00000013673;…	K04738+K04702+K04189+K05070+K03175+K08015+K04350+K16060+K05067+K05064+K07860+K04707+K02678+K02091+K04492+K04515+K19662+K04726+K07201+K04411+K08736+K06055+K05071+K08735+K00922+K11218+K12361+K06476+K02580+K01388+K10152+K05859+K19663+K05092+K05072
Human Diseases	Cardiovascular diseases	Viral myocarditis	8	72	0.0198152	0.126547	ko05416	ENSRNOG00000000454;ENSRNOG00000001224;ENSRNOG00000007350;ENSRNOG00000012439;ENSRNOG00000017980;ENSRNOG00000026762;ENSRNOG00000032844;ENSRNOG00000033215	K06752+K06464+K07860+K04726+K05718+K06752+K06752+K06752
Genetic Information Processing	Replication and repair	Non-homologous end-joining	3	13	0.0210897	0.131693	ko03450	ENSRNOG00000013615;ENSRNOG00000013647;ENSRNOG00000014605	K00977+K03513+K10777
Human Diseases	Cancers	Transcriptional misregulation in cancers	15	179	0.0222838	0.136125	ko05202	ENSRNOG00000003098;ENSRNOG00000005731;ENSRNOG00000008310;ENSRNOG00000008904;ENSRNOG00000012208;ENSRNOG00000013397;ENSRNOG00000016595;ENSRNOG00000023258;ENSRNOG00000024729;ENSRNOG00000033685;ENSRNOG00000038140;ENSRNOG00000046434;ENSRNOG00000051499;ENSRNOG00000054764;ENSRNOG00000056281	K06532+K16060+K10789+K09436+K06590+K07201+K08024+K02580+K09383+K01327+K11424+K11253+K09063+K05092+K11253
Cellular Processes	Cellular community - eukaryotes	Tight junction	14	164	0.0231862	0.138624	ko04530	ENSRNOG00000003232;ENSRNOG00000003597;ENSRNOG00000004860;ENSRNOG00000010708;ENSRNOG00000013177;ENSRNOG00000013836;ENSRNOG00000015603;ENSRNOG00000015733;ENSRNOG00000018524;ENSRNOG00000022635;ENSRNOG00000028090;ENSRNOG00000031058;ENSRNOG00000031855;ENSRNOG00000038881	K13365+K07374+K10352+K09183+K04416+K20638+K18050+K12757+K08007+K12075+K21066+K05747+K18584+K06106
Cellular Processes	Cellular community - eukaryotes	Focal adhesion	16	199	0.0263147	0.154051	ko04510	ENSRNOG00000005731;ENSRNOG00000007350;ENSRNOG00000007422;ENSRNOG00000007925;ENSRNOG00000012061;ENSRNOG00000012208;ENSRNOG00000015733;ENSRNOG00000016846;ENSRNOG00000019689;ENSRNOG00000022071;ENSRNOG00000023007;ENSRNOG00000048472;ENSRNOG00000050258;ENSRNOG00000050430;ENSRNOG00000052064;ENSRNOG00000054371	K16060+K07860+K05730+K05735+K19662+K06590+K12757+K00922+K03900+K06476+K06238+K04659+K10152+K05730+K06275+K19663
Environmental Information Processing	Signal transduction	Sphingolipid signaling pathway	11	121	0.0277986	0.159416	ko04071	ENSRNOG00000000068;ENSRNOG00000005370;ENSRNOG00000007350;ENSRNOG00000011716;ENSRNOG00000012061;ENSRNOG00000012439;ENSRNOG00000015603;ENSRNOG00000016846;ENSRNOG00000023258;ENSRNOG00000037695;ENSRNOG00000054371	K11584+K04293+K07860+K04712+K19662+K04726+K18050+K00922+K02580+K04717+K19663
Genetic Information Processing	Replication and repair	Homologous recombination	5	39	0.0354282	0.199107	ko03440	ENSRNOG00000001845;ENSRNOG00000003123;ENSRNOG00000009789;ENSRNOG00000019681;ENSRNOG00000059997	K03165+K07466+K10728+K02327+K15362
Human Diseases	Infectious diseases	Influenza A	13	158	0.0363603	0.200338	ko05164	ENSRNOG00000000454;ENSRNOG00000002659;ENSRNOG00000006612;ENSRNOG00000012061;ENSRNOG00000015329;ENSRNOG00000016846;ENSRNOG00000023258;ENSRNOG00000026650;ENSRNOG00000026762;ENSRNOG00000027017;ENSRNOG00000032844;ENSRNOG00000032948;ENSRNOG00000033215	K06752+K08060+K04432+K19662+K15043+K00922+K02580+K09635+K06752+K01165+K06752+K11219+K06752
Environmental Information Processing	Signal transduction	Phosphatidylinositol signaling system	9	96	0.0373392	0.201775	ko04070	ENSRNOG00000001796;ENSRNOG00000012061;ENSRNOG00000016846;ENSRNOG00000017020;ENSRNOG00000017737;ENSRNOG00000022943;ENSRNOG00000023238;ENSRNOG00000051986;ENSRNOG00000054371	K00901+K19662+K00922+K03084+K00901+K00901+K00901+K05859+K19663
Environmental Information Processing	Signal transduction	Ras signaling pathway	17	229	0.0434827	0.23054	ko04014	ENSRNOG00000005342;ENSRNOG00000005404;ENSRNOG00000006167;ENSRNOG00000007350;ENSRNOG00000007925;ENSRNOG00000008941;ENSRNOG00000012061;ENSRNOG00000013529;ENSRNOG00000016846;ENSRNOG00000017671;ENSRNOG00000021098;ENSRNOG00000023258;ENSRNOG00000026764;ENSRNOG00000051986;ENSRNOG00000054371;ENSRNOG00000054764;ENSRNOG00000055705	K08015+K04350+K17634+K07860+K05735+K02678+K19662+K04411+K00922+K12380+K12361+K02580+K16342+K05859+K19663+K05092+K04163
Environmental Information Processing	Signal transduction	Phospholipase D signaling pathway	12	147	0.0455071	0.236725	ko04072	ENSRNOG00000001796;ENSRNOG00000005662;ENSRNOG00000009385;ENSRNOG00000012160;ENSRNOG00000014290;ENSRNOG00000016846;ENSRNOG00000017737;ENSRNOG00000022943;ENSRNOG00000023238;ENSRNOG00000026764;ENSRNOG00000027839;ENSRNOG00000051986	K00901+K04608+K21289+K05855+K04603+K00922+K00901+K00901+K00901+K16342+K05871+K05859
Environmental Information Processing	Signal transduction	ErbB signaling pathway	8	85	0.0471765	0.236725	ko04012	ENSRNOG00000007925;ENSRNOG00000008444;ENSRNOG00000011589;ENSRNOG00000012061;ENSRNOG00000016846;ENSRNOG00000019093;ENSRNOG00000051986;ENSRNOG00000054371	K05735+K04707+K04515+K19662+K00922+K05456+K05859+K19663
Human Diseases	Immune diseases	Rheumatoid arthritis	8	85	0.0471765	0.236725	ko05323	ENSRNOG00000000454;ENSRNOG00000001224;ENSRNOG00000017980;ENSRNOG00000022480;ENSRNOG00000026762;ENSRNOG00000032353;ENSRNOG00000032844;ENSRNOG00000033215	K06752+K06464+K05718+K02152+K06752+K01388+K06752+K06752

## Sheet: 14d up KEGG
Table S6. KEGG pathway analysis of up-regulated genes in the Dex 14d group. Pathways with p values smaller than 0.05 were regarded as statistically significant enriched. Statistical test method: hypergeometric test / Fisher's exact test. FDR correction method: Benjamini and Hochberg.
KEGG_A_class	KEGG_B_class	Pathway	Input number (271)	Background number (7989)	p value	Corrected p Value	Pathway ID	Genes	K_IDs
Organismal Systems	Immune system	Complement and coagulation cascades	14	80	3.86697e-07	9.78343e-05	ko04610	ENSRNOG00000001865;ENSRNOG00000007457;ENSRNOG00000012749;ENSRNOG00000012804;ENSRNOG00000012807;ENSRNOG00000014118;ENSRNOG00000024115;ENSRNOG00000028896;ENSRNOG00000030387;ENSRNOG00000038132;ENSRNOG00000042821;ENSRNOG00000045772;ENSRNOG00000051235;ENSRNOG00000061379	K03912+K04001+K03987+K03988+K03986+K01324+K03995+K03910+K03898+K19822+K04008+K03910+K01332+K03996
Cellular Processes	Cell growth and death	Ferroptosis	9	40	5.65298e-06	0.000715102	ko04216	ENSRNOG00000001766;ENSRNOG00000006302;ENSRNOG00000009832;ENSRNOG00000010210;ENSRNOG00000011913;ENSRNOG00000012508;ENSRNOG00000014117;ENSRNOG00000018487;ENSRNOG00000019183	K06503+K11204+K14720+K13869+K13624+K14714+K00510+K06519+K00460
Cellular Processes	Transport and catabolism	Lysosome	14	120	5.08521e-05	0.00428853	ko04142	ENSRNOG00000000913;ENSRNOG00000006926;ENSRNOG00000007089;ENSRNOG00000010331;ENSRNOG00000011150;ENSRNOG00000012062;ENSRNOG00000016262;ENSRNOG00000017506;ENSRNOG00000020206;ENSRNOG00000021155;ENSRNOG00000021157;ENSRNOG00000037563;ENSRNOG00000046159;ENSRNOG00000046261	K01195+K02146+K01369+K01363+K01135+K13443+K01158+K04645+K01379+K01371+K01368+K06501+K01137+K14379
Environmental Information Processing	Signal transduction	Rap1 signaling pathway	18	205	0.000197436	0.0124878	ko04015	ENSRNOG00000002244;ENSRNOG00000002511;ENSRNOG00000003999;ENSRNOG00000004890;ENSRNOG00000005386;ENSRNOG00000005650;ENSRNOG00000008223;ENSRNOG00000013656;ENSRNOG00000014060;ENSRNOG00000016050;ENSRNOG00000016374;ENSRNOG00000018414;ENSRNOG00000018461;ENSRNOG00000018659;ENSRNOG00000020151;ENSRNOG00000022060;ENSRNOG00000023881;ENSRNOG00000046829	K04363+K05097+K08043+K08048+K05461+K16859+K04277+K04289+K07831+K04362+K05093+K05090+K05089+K05453+K05689+K05631+K17699+K05098
Metabolism	Metabolism of cofactors and vitamins	Porphyrin and chlorophyll metabolism	6	29	0.000354443	0.0179348	ko00860	ENSRNOG00000000913;ENSRNOG00000001990;ENSRNOG00000011913;ENSRNOG00000014117;ENSRNOG00000017810;ENSRNOG00000018053	K01195+K00699+K13624+K00510+K01719+K01772
Environmental Information Processing	Signal transduction	PI3K-Akt signaling pathway	24	341	0.000533786	0.022508	ko04151	ENSRNOG00000000299;ENSRNOG00000002158;ENSRNOG00000002244;ENSRNOG00000002511;ENSRNOG00000002667;ENSRNOG00000003304;ENSRNOG00000004912;ENSRNOG00000005386;ENSRNOG00000005650;ENSRNOG00000008055;ENSRNOG00000013656;ENSRNOG00000014597;ENSRNOG00000015654;ENSRNOG00000016050;ENSRNOG00000016374;ENSRNOG00000018414;ENSRNOG00000018461;ENSRNOG00000018659;ENSRNOG00000020369;ENSRNOG00000021217;ENSRNOG00000022060;…	K09408+K06253+K04363+K05097+K06246+K06248+K06487+K05461+K16859+K06626+K04289+K16172+K05080+K04362+K05093+K05090+K05089+K05453+K13769+K06586+K05631+K06250+K05098+K10151
Human Diseases	Neurodegenerative diseases	Prion diseases	6	33	0.000737462	0.026654	ko05020	ENSRNOG00000012749;ENSRNOG00000012804;ENSRNOG00000012807;ENSRNOG00000024115;ENSRNOG00000031890;ENSRNOG00000061379	K03987+K03988+K03986+K03995+K06491+K03996
Human Diseases	Cancers	Pathways in cancer	31	517	0.00131424	0.041563	ko05200	ENSRNOG00000002244;ENSRNOG00000002511;ENSRNOG00000002667;ENSRNOG00000003999;ENSRNOG00000004890;ENSRNOG00000004912;ENSRNOG00000005386;ENSRNOG00000005650;ENSRNOG00000006003;ENSRNOG00000008055;ENSRNOG00000010640;ENSRNOG00000010997;ENSRNOG00000013017;ENSRNOG00000013589;ENSRNOG00000013656;ENSRNOG00000014117;ENSRNOG00000014751;ENSRNOG00000015911;ENSRNOG00000016050;ENSRNOG00000016374;ENSRNOG00000018414;…	K04363+K05097+K06246+K08043+K08048+K06487+K05461+K16859+K05691+K06626+K04166+K04198+K15589+K10031+K04289+K00510+K05126+K03068+K04362+K05093+K05090+K05089+K00799+K05689+K13769+K09095+K00799+K00799+K06765+K01357+K10151
Environmental Information Processing	Signaling molecules and interaction	Cell adhesion molecules (CAMs)	13	153	0.00203436	0.057188	ko04514	ENSRNOG00000004438;ENSRNOG00000004912;ENSRNOG00000018778;ENSRNOG00000019977;ENSRNOG00000020129;ENSRNOG00000020151;ENSRNOG00000021243;ENSRNOG00000027954;ENSRNOG00000031890;ENSRNOG00000032576;ENSRNOG00000042848;ENSRNOG00000050220;ENSRNOG00000059947	K06759+K06487+K06781+K05695+K06796+K05689+K06548+K06809+K06491+K07378+K06735+K07377+K06257
Metabolism	Xenobiotics biodegradation and metabolism	Drug metabolism - cytochrome P450	7	55	0.00240784	0.0609184	ko00982	ENSRNOG00000001990;ENSRNOG00000006583;ENSRNOG00000017872;ENSRNOG00000018937;ENSRNOG00000028746;ENSRNOG00000030449;ENSRNOG00000034191	K00699+K04097+K00129+K00799+K00799+K00799+K00485
Metabolism	Metabolism of cofactors and vitamins	Riboflavin metabolism	3	9	0.00278549	0.0640663	ko00740	ENSRNOG00000013791;ENSRNOG00000013994;ENSRNOG00000046261	K01513+K01513+K14379
Organismal Systems	Digestive system	Salivary secretion	8	75	0.00372557	0.074969	ko04970	ENSRNOG00000003999;ENSRNOG00000004890;ENSRNOG00000005195;ENSRNOG00000005985;ENSRNOG00000006645;ENSRNOG00000011227;ENSRNOG00000014347;ENSRNOG00000022737	K08043+K08048+K13899+K04936+K04963+K01540+K13855+K13912
Environmental Information Processing	Signaling molecules and interaction	Cytokine-cytokine receptor interaction	18	265	0.00385216	0.074969	ko04060	ENSRNOG00000002792;ENSRNOG00000002964;ENSRNOG00000005033;ENSRNOG00000006715;ENSRNOG00000009848;ENSRNOG00000011696;ENSRNOG00000011984;ENSRNOG00000013589;ENSRNOG00000013717;ENSRNOG00000015615;ENSRNOG00000015654;ENSRNOG00000016289;ENSRNOG00000018414;ENSRNOG00000018659;ENSRNOG00000030021;ENSRNOG00000032973;ENSRNOG00000051993;ENSRNOG00000052469	K05505+K05507+K04675+K04176+K05482+K05058+K10033+K10031+K16620+K05147+K05080+K13578+K05090+K05453+K05510+K05077+K22674+K04673
Metabolism	Metabolism of other amino acids	Glutathione metabolism	7	63	0.00521819	0.0943001	ko00480	ENSRNOG00000006302;ENSRNOG00000006583;ENSRNOG00000014610;ENSRNOG00000018937;ENSRNOG00000028746;ENSRNOG00000030449;ENSRNOG00000052564	K11204+K04097+K11140+K00799+K00799+K00799+K00432
Environmental Information Processing	Signaling molecules and interaction	ECM-receptor interaction	8	81	0.00596806	0.100661	ko04512	ENSRNOG00000002158;ENSRNOG00000002667;ENSRNOG00000003304;ENSRNOG00000004912;ENSRNOG00000021217;ENSRNOG00000040108;ENSRNOG00000043451;ENSRNOG00000059947	K06253+K06246+K06248+K06487+K06586+K06259+K06250+K06257
Environmental Information Processing	Signal transduction	Calcium signaling pathway	13	184	0.00967735	0.149611	ko04020	ENSRNOG00000002244;ENSRNOG00000002863;ENSRNOG00000003999;ENSRNOG00000004890;ENSRNOG00000006645;ENSRNOG00000008479;ENSRNOG00000010640;ENSRNOG00000010997;ENSRNOG00000014840;ENSRNOG00000017546;ENSRNOG00000018461;ENSRNOG00000028708;ENSRNOG00000050658	K04363+K04852+K08043+K08048+K04963+K05849+K04166+K04198+K04636+K00907+K05089+K04211+K04223
Metabolism	Xenobiotics biodegradation and metabolism	Metabolism of xenobiotics by cytochrome P450	6	55	0.0103714	0.149611	ko00980	ENSRNOG00000001990;ENSRNOG00000006583;ENSRNOG00000017872;ENSRNOG00000018937;ENSRNOG00000028746;ENSRNOG00000030449	K00699+K04097+K00129+K00799+K00799+K00799
Metabolism	Lipid metabolism	Fatty acid biosynthesis	3	14	0.0106442	0.149611	ko00061	ENSRNOG00000011381;ENSRNOG00000034013;ENSRNOG00000045636	K15013+K11262+K00665
Human Diseases	Cancers	Chemical carcinogenesis	7	73	0.0115502	0.1538	ko05204	ENSRNOG00000001990;ENSRNOG00000006583;ENSRNOG00000017872;ENSRNOG00000018937;ENSRNOG00000028746;ENSRNOG00000030449;ENSRNOG00000046643	K00699+K04097+K00129+K00799+K00799+K00799+K07424
Organismal Systems	Digestive system	Gastric acid secretion	7	74	0.0123989	0.156847	ko04971	ENSRNOG00000003999;ENSRNOG00000004890;ENSRNOG00000009629;ENSRNOG00000011227;ENSRNOG00000014347;ENSRNOG00000015306;ENSRNOG00000017546	K08043+K08048+K18245+K01540+K13855+K13961+K00907
Human Diseases	Cancers	Choline metabolism in cancer	8	95	0.0150545	0.164415	ko05231	ENSRNOG00000001762;ENSRNOG00000002244;ENSRNOG00000012358;ENSRNOG00000018461;ENSRNOG00000022946;ENSRNOG00000026705;ENSRNOG00000039323;ENSRNOG00000055089	K00968+K04363+K00968+K05089+K08200+K00901+K00901+K06515
Metabolism	Metabolism of other amino acids	Phosphonate and phosphinate metabolism	2	6	0.0157113	0.164415	ko00440	ENSRNOG00000001762;ENSRNOG00000012358	K00968+K00968
Organismal Systems	Digestive system	Mineral absorption	5	44	0.0159537	0.164415	ko04978	ENSRNOG00000006076;ENSRNOG00000008479;ENSRNOG00000011227;ENSRNOG00000014117;ENSRNOG00000054420	K14738+K05849+K01540+K00510+K08539
Human Diseases	Immune diseases	Systemic lupus erythematosus	9	115	0.0159632	0.164415	ko05322	ENSRNOG00000012749;ENSRNOG00000012804;ENSRNOG00000012807;ENSRNOG00000024115;ENSRNOG00000051235;ENSRNOG00000051891;ENSRNOG00000053845;ENSRNOG00000060366;ENSRNOG00000061379	K03987+K03988+K03986+K03995+K01332+K11254+K11252+K11254+K03996
Human Diseases	Drug resistance	EGFR tyrosine kinase inhibitor resistance	7	78	0.0162466	0.164415	ko01521	ENSRNOG00000000299;ENSRNOG00000002244;ENSRNOG00000016374;ENSRNOG00000018233;ENSRNOG00000018461;ENSRNOG00000020716;ENSRNOG00000046829	K09408+K04363+K05093+K05464+K05089+K05115+K05098
Cellular Processes	Cellular community - eukaryotes	Focal adhesion	13	199	0.017718	0.164894	ko04510	ENSRNOG00000002158;ENSRNOG00000002244;ENSRNOG00000002511;ENSRNOG00000002667;ENSRNOG00000003304;ENSRNOG00000004912;ENSRNOG00000005650;ENSRNOG00000017546;ENSRNOG00000018461;ENSRNOG00000021217;ENSRNOG00000043451;ENSRNOG00000046829;ENSRNOG00000057710	K06253+K04363+K05097+K06246+K06248+K06487+K16859+K00907+K05089+K06586+K06250+K05098+K10151
Metabolism	Metabolism of cofactors and vitamins	Pantothenate and CoA biosynthesis	3	17	0.0184497	0.164894	ko00770	ENSRNOG00000004298;ENSRNOG00000013791;ENSRNOG00000013994	K01464+K01513+K01513
Cellular Processes	Cellular community - eukaryotes	Signaling pathways regulating pluripotency of stem cells	10	138	0.0187074	0.164894	ko04550	ENSRNOG00000005033;ENSRNOG00000008095;ENSRNOG00000010259;ENSRNOG00000011696;ENSRNOG00000016050;ENSRNOG00000016289;ENSRNOG00000016374;ENSRNOG00000046487;ENSRNOG00000052469;ENSRNOG00000052510	K04675+K08026+K08553+K05058+K04362+K13578+K05093+K09367+K04673+K01357
Organismal Systems	Digestive system	Pancreatic secretion	8	99	0.0189009	0.164894	ko04972	ENSRNOG00000003999;ENSRNOG00000004890;ENSRNOG00000005985;ENSRNOG00000009629;ENSRNOG00000011227;ENSRNOG00000013628;ENSRNOG00000014347;ENSRNOG00000030904	K08043+K08048+K04936+K18245+K01540+K01346+K13855+K01291
Metabolism	Glycan biosynthesis and metabolism	Glycosaminoglycan degradation	3	18	0.0215956	0.180064	ko00531	ENSRNOG00000000913;ENSRNOG00000011150;ENSRNOG00000046159	K01195+K01135+K01137
Metabolism	Metabolism of cofactors and vitamins	Nicotinate and nicotinamide metabolism	4	32	0.0220631	0.180064	ko00760	ENSRNOG00000013791;ENSRNOG00000013994;ENSRNOG00000019424;ENSRNOG00000027697	K01513+K01513+K06989+K06210
Human Diseases	Immune diseases	Rheumatoid arthritis	7	85	0.0248946	0.195344	ko05323	ENSRNOG00000006926;ENSRNOG00000009848;ENSRNOG00000013589;ENSRNOG00000015615;ENSRNOG00000018659;ENSRNOG00000021155;ENSRNOG00000046261	K02146+K05482+K10031+K05147+K05453+K01371+K14379
Human Diseases	Cardiovascular diseases	Fluid shear stress and atherosclerosis	10	146	0.0265091	0.195344	ko05418	ENSRNOG00000004912;ENSRNOG00000005033;ENSRNOG00000014117;ENSRNOG00000016289;ENSRNOG00000018937;ENSRNOG00000028746;ENSRNOG00000030449;ENSRNOG00000046829;ENSRNOG00000052469;ENSRNOG00000059947	K06487+K04675+K00510+K13578+K00799+K00799+K00799+K05098+K04673+K06257
Cellular Processes	Cell motility	Regulation of actin cytoskeleton	13	211	0.0271744	0.195344	ko04810	ENSRNOG00000002244;ENSRNOG00000004498;ENSRNOG00000004912;ENSRNOG00000013589;ENSRNOG00000013656;ENSRNOG00000014060;ENSRNOG00000016050;ENSRNOG00000016374;ENSRNOG00000017546;ENSRNOG00000018461;ENSRNOG00000018991;ENSRNOG00000021217;ENSRNOG00000046639	K04363+K05768+K06487+K10031+K04289+K07831+K04362+K05093+K00907+K05089+K05768+K06586+K06524
Environmental Information Processing	Signal transduction	Phospholipase D signaling pathway	10	147	0.0276267	0.195344	ko04072	ENSRNOG00000002244;ENSRNOG00000003999;ENSRNOG00000004890;ENSRNOG00000005386;ENSRNOG00000010640;ENSRNOG00000013656;ENSRNOG00000014060;ENSRNOG00000018461;ENSRNOG00000026705;ENSRNOG00000039323	K04363+K08043+K08048+K05461+K04166+K04289+K07831+K05089+K00901+K00901
Human Diseases	Infectious diseases	Malaria	5	51	0.0285308	0.195344	ko05144	ENSRNOG00000009848;ENSRNOG00000029886;ENSRNOG00000040108;ENSRNOG00000047321;ENSRNOG00000059947	K05482+K13822+K06259+K13822+K06257
Organismal Systems	Immune system	Hematopoietic cell lineage	7	88	0.0294186	0.195344	ko04640	ENSRNOG00000001766;ENSRNOG00000005386;ENSRNOG00000014610;ENSRNOG00000018414;ENSRNOG00000018659;ENSRNOG00000040108;ENSRNOG00000042821	K06503+K05461+K11140+K05090+K05453+K06259+K04008
Organismal Systems	Endocrine system	Renin-angiotensin system	4	35	0.0296969	0.195344	ko04614	ENSRNOG00000010640;ENSRNOG00000014610;ENSRNOG00000018445;ENSRNOG00000051854	K04166+K11140+K09821+K11141
Metabolism	Global and overview maps	Fatty acid metabolism	5	52	0.0307231	0.195344	ko01212	ENSRNOG00000011381;ENSRNOG00000014254;ENSRNOG00000030232;ENSRNOG00000034013;ENSRNOG00000045636	K15013+K08765+K10703+K11262+K00665
Organismal Systems	Digestive system	Bile secretion	6	70	0.0308844	0.195344	ko04976	ENSRNOG00000003999;ENSRNOG00000004890;ENSRNOG00000007041;ENSRNOG00000009629;ENSRNOG00000011227;ENSRNOG00000014347	K08043+K08048+K05681+K18245+K01540+K13855
Environmental Information Processing	Signal transduction	Hippo signaling pathway	10	153	0.0350469	0.216265	ko04390	ENSRNOG00000005933;ENSRNOG00000006003;ENSRNOG00000008065;ENSRNOG00000013717;ENSRNOG00000016280;ENSRNOG00000016289;ENSRNOG00000020151;ENSRNOG00000052469;ENSRNOG00000052510;ENSRNOG00000057710	K16687+K05691+K16685+K16620+K03362+K13578+K05689+K04673+K01357+K10151
Metabolism	Xenobiotics biodegradation and metabolism	Drug metabolism - other enzymes	6	73	0.0369042	0.222304	ko00983	ENSRNOG00000000913;ENSRNOG00000001990;ENSRNOG00000004298;ENSRNOG00000018937;ENSRNOG00000028746;ENSRNOG00000030449	K01195+K00699+K01464+K00799+K00799+K00799
Environmental Information Processing	Signal transduction	Apelin signaling pathway	9	137	0.0430536	0.253315	ko04371	ENSRNOG00000003999;ENSRNOG00000004890;ENSRNOG00000006645;ENSRNOG00000008479;ENSRNOG00000010640;ENSRNOG00000014060;ENSRNOG00000017546;ENSRNOG00000020151;ENSRNOG00000043451	K08043+K08048+K04963+K05849+K04166+K07831+K00907+K05689+K06250
Environmental Information Processing	Signal transduction	Ras signaling pathway	13	229	0.0476469	0.27337	ko04014	ENSRNOG00000002244;ENSRNOG00000002347;ENSRNOG00000002511;ENSRNOG00000005386;ENSRNOG00000005650;ENSRNOG00000014060;ENSRNOG00000016050;ENSRNOG00000016374;ENSRNOG00000018414;ENSRNOG00000018461;ENSRNOG00000018659;ENSRNOG00000020369;ENSRNOG00000046829	K04363+K17635+K05097+K05461+K16859+K07831+K04362+K05093+K05090+K05089+K05453+K13769+K05098
Environmental Information Processing	Signal transduction	cGMP - PKG signaling pathway	10	162	0.0486232	0.27337	ko04022	ENSRNOG00000003999;ENSRNOG00000004890;ENSRNOG00000005985;ENSRNOG00000008479;ENSRNOG00000010640;ENSRNOG00000010997;ENSRNOG00000011227;ENSRNOG00000014597;ENSRNOG00000017546;ENSRNOG00000054458	K08043+K08048+K04936+K05849+K04166+K04198+K01540+K16172+K00907+K04941

## Sheet: 14d down KEGG
Table S6. KEGG pathway analysis of down-regulated genes in the Dex 14d group. Pathways with p values smaller than 0.05 were regarded as statistically significant enriched. Statistical test method: hypergeometric test / Fisher's exact test. FDR correction method: Benjamini and Hochberg.
KEGG_A_class	KEGG_B_class	Pathway	Input number (328)	Background number (7989)	p value	Corrected p Value	Pathway ID	Genes	K_IDs
Organismal Systems	Immune system	Hematopoietic cell lineage	28	88	3.76894e-18	9.87463e-16	ko04640	ENSRNOG00000000321;ENSRNOG00000000451;ENSRNOG00000000454;ENSRNOG00000001005;ENSRNOG00000001518;ENSRNOG00000003069;ENSRNOG00000005954;ENSRNOG00000007129;ENSRNOG00000010015;ENSRNOG00000013615;ENSRNOG00000015441;ENSRNOG00000015945;ENSRNOG00000015994;ENSRNOG00000018311;ENSRNOG00000020699;ENSRNOG00000020945;ENSRNOG00000021499;ENSRNOG00000022071;ENSRNOG00000024000;ENSRNOG00000025959;ENSRNOG00000026762;…	K06469+K06752+K06752+K06468+K06485+K01242+K05067+K06459+K06263+K00977+K05071+K06452+K06450+K06465+K06475+K06466+K06473+K06476+K06467+K06261+K06752+K06752+K06752+K06752+K04012+K06262+K05092+K05072
Human Diseases	Immune diseases	Primary immunodeficiency	17	38	2.33591e-14	3.06005e-12	ko05340	ENSRNOG00000000655;ENSRNOG00000002304;ENSRNOG00000002659;ENSRNOG00000003954;ENSRNOG00000004623;ENSRNOG00000004630;ENSRNOG00000007129;ENSRNOG00000007664;ENSRNOG00000009705;ENSRNOG00000013967;ENSRNOG00000015994;ENSRNOG00000018311;ENSRNOG00000018488;ENSRNOG00000020125;ENSRNOG00000049925;ENSRNOG00000052407;ENSRNOG00000058446	K06478+K05150+K08060+K05070+K10988+K10628+K06459+K05151+K05856+K07371+K06450+K06465+K03160+K06506+K06506+K07370+K05072
Organismal Systems	Immune system	B cell receptor signaling pathway	20	70	2.60324e-12	2.23536e-10	ko04662	ENSRNOG00000007422;ENSRNOG00000008180;ENSRNOG00000011917;ENSRNOG00000012061;ENSRNOG00000012160;ENSRNOG00000013309;ENSRNOG00000013967;ENSRNOG00000016846;ENSRNOG00000017020;ENSRNOG00000017181;ENSRNOG00000017485;ENSRNOG00000018311;ENSRNOG00000020125;ENSRNOG00000023258;ENSRNOG00000024000;ENSRNOG00000034164;ENSRNOG00000049925;ENSRNOG00000050430;ENSRNOG00000051986;ENSRNOG00000052407	K05730+K05854+K06507+K19662+K05855+K12230+K07371+K00922+K03084+K07369+K06504+K06465+K06506+K02580+K06467+K04012+K06506+K05730+K05859+K07370
Organismal Systems	Immune system	Platelet activation	26	124	3.41276e-12	2.23536e-10	ko04611	ENSRNOG00000001804;ENSRNOG00000003357;ENSRNOG00000005404;ENSRNOG00000007048;ENSRNOG00000007415;ENSRNOG00000008180;ENSRNOG00000009385;ENSRNOG00000009440;ENSRNOG00000010015;ENSRNOG00000012160;ENSRNOG00000016846;ENSRNOG00000017606;ENSRNOG00000019689;ENSRNOG00000020425;ENSRNOG00000020585;ENSRNOG00000021098;ENSRNOG00000021161;ENSRNOG00000022071;ENSRNOG00000025959;ENSRNOG00000026764;ENSRNOG00000046981;…	K04959+K19720+K04350+K07836+K00509+K05854+K21289+K12319+K06263+K05855+K00922+K05215+K03900+K16059+K04264+K12361+K17084+K06476+K06261+K16342+K06262+K06264+K04236+K08049+K05859+K07370
Human Diseases	Immune diseases	Asthma	10	27	5.37334e-08	2.81563e-06	ko05310	ENSRNOG00000000451;ENSRNOG00000000454;ENSRNOG00000008394;ENSRNOG00000008707;ENSRNOG00000018488;ENSRNOG00000026762;ENSRNOG00000032708;ENSRNOG00000032844;ENSRNOG00000033215;ENSRNOG00000053457	K06752+K06752+K10786+K10788+K03160+K06752+K06752+K06752+K06752+K10787
Organismal Systems	Immune system	Intestinal immune network for IgA production	11	43	8.35783e-07	3.51044e-05	ko04672	ENSRNOG00000000451;ENSRNOG00000000454;ENSRNOG00000002304;ENSRNOG00000003866;ENSRNOG00000004405;ENSRNOG00000007664;ENSRNOG00000018488;ENSRNOG00000026762;ENSRNOG00000032708;ENSRNOG00000032844;ENSRNOG00000033215	K06752+K06752+K05150+K04189+K13073+K05151+K03160+K06752+K06752+K06752+K06752
Organismal Systems	Immune system	T cell receptor signaling pathway	17	104	9.37905e-07	3.51044e-05	ko04660	ENSRNOG00000000655;ENSRNOG00000005404;ENSRNOG00000005509;ENSRNOG00000007129;ENSRNOG00000007422;ENSRNOG00000009705;ENSRNOG00000015945;ENSRNOG00000015994;ENSRNOG00000016378;ENSRNOG00000016846;ENSRNOG00000017155;ENSRNOG00000017181;ENSRNOG00000019057;ENSRNOG00000023258;ENSRNOG00000048597;ENSRNOG00000049797;ENSRNOG00000050430	K06478+K04350+K05736+K06459+K05730+K05856+K06452+K06450+K04415+K00922+K19862+K07369+K18052+K02580+K04410+K06744+K05730
Organismal Systems	Immune system	Th1 and Th2 cell differentiation	15	87	2.06698e-06	6.76937e-05	ko04658	ENSRNOG00000000451;ENSRNOG00000000454;ENSRNOG00000002079;ENSRNOG00000003954;ENSRNOG00000007270;ENSRNOG00000009705;ENSRNOG00000015441;ENSRNOG00000015945;ENSRNOG00000015994;ENSRNOG00000019057;ENSRNOG00000023258;ENSRNOG00000026762;ENSRNOG00000032708;ENSRNOG00000032844;ENSRNOG00000033215	K06752+K06752+K04440+K05070+K05064+K05856+K05071+K06452+K06450+K18052+K02580+K06752+K06752+K06752+K06752
Organismal Systems	Immune system	Leukocyte transendothelial migration	17	113	3.08294e-06	8.97479e-05	ko04670	ENSRNOG00000002540;ENSRNOG00000003491;ENSRNOG00000003866;ENSRNOG00000005342;ENSRNOG00000006604;ENSRNOG00000007048;ENSRNOG00000007422;ENSRNOG00000007922;ENSRNOG00000012061;ENSRNOG00000016695;ENSRNOG00000016846;ENSRNOG00000020246;ENSRNOG00000027839;ENSRNOG00000030118;ENSRNOG00000050430;ENSRNOG00000051986;ENSRNOG00000054371	K07873+K02677+K04189+K08015+K06514+K07836+K05730+K06087+K19662+K01398+K00922+K12755+K05871+K05763+K05730+K05859+K19663
Organismal Systems	Immune system	Th17 cell differentiation	16	104	4.47707e-06	0.000117299	ko04659	ENSRNOG00000000451;ENSRNOG00000000454;ENSRNOG00000002079;ENSRNOG00000003954;ENSRNOG00000009705;ENSRNOG00000015441;ENSRNOG00000015773;ENSRNOG00000015945;ENSRNOG00000015994;ENSRNOG00000019057;ENSRNOG00000023258;ENSRNOG00000026762;ENSRNOG00000032708;ENSRNOG00000032844;ENSRNOG00000033215;ENSRNOG00000061070	K06752+K06752+K04440+K05070+K05856+K05071+K05075+K06452+K06450+K18052+K02580+K06752+K06752+K06752+K06752+K09445
Organismal Systems	Immune system	Fc gamma R-mediated phagocytosis	14	83	5.93441e-06	0.000141347	ko04666	ENSRNOG00000000655;ENSRNOG00000003491;ENSRNOG00000007422;ENSRNOG00000008180;ENSRNOG00000012061;ENSRNOG00000012160;ENSRNOG00000012852;ENSRNOG00000014317;ENSRNOG00000015603;ENSRNOG00000016846;ENSRNOG00000017020;ENSRNOG00000050430;ENSRNOG00000051986;ENSRNOG00000054371	K06478+K02677+K05730+K05854+K19662+K05855+K12562+K05754+K18050+K00922+K03084+K05730+K05859+K19663
Environmental Information Processing	Signal transduction	Phosphatidylinositol signaling system	15	96	7.34202e-06	0.000160301	ko04070	ENSRNOG00000001796;ENSRNOG00000001804;ENSRNOG00000002969;ENSRNOG00000003491;ENSRNOG00000008514;ENSRNOG00000012061;ENSRNOG00000016846;ENSRNOG00000017020;ENSRNOG00000017635;ENSRNOG00000017737;ENSRNOG00000020388;ENSRNOG00000023238;ENSRNOG00000029938;ENSRNOG00000051986;ENSRNOG00000054371	K00901+K04959+K00911+K02677+K05861+K19662+K00922+K03084+K01106+K00901+K21798+K00901+K00923+K05859+K19663
Organismal Systems	Immune system	Fc epsilon RI signaling pathway	12	66	1.25152e-05	0.000252229	ko04664	ENSRNOG00000002079;ENSRNOG00000003491;ENSRNOG00000004437;ENSRNOG00000007422;ENSRNOG00000008180;ENSRNOG00000012160;ENSRNOG00000016846;ENSRNOG00000017020;ENSRNOG00000026764;ENSRNOG00000050430;ENSRNOG00000051986;ENSRNOG00000052407	K04440+K02677+K04433+K05730+K05854+K05855+K00922+K03084+K16342+K05730+K05859+K07370
Environmental Information Processing	Signaling molecules and interaction	Cell adhesion molecules (CAMs)	19	153	1.46538e-05	0.000274234	ko04514	ENSRNOG00000000451;ENSRNOG00000000454;ENSRNOG00000000655;ENSRNOG00000001518;ENSRNOG00000002794;ENSRNOG00000007129;ENSRNOG00000007922;ENSRNOG00000013694;ENSRNOG00000018488;ENSRNOG00000024000;ENSRNOG00000026762;ENSRNOG00000029386;ENSRNOG00000031090;ENSRNOG00000032708;ENSRNOG00000032844;ENSRNOG00000033215;ENSRNOG00000038197;ENSRNOG00000049797;ENSRNOG00000056574	K06752+K06752+K06478+K06485+K06496+K06459+K06087+K16359+K03160+K06467+K06752+K06751+K06751+K06752+K06752+K06752+K06567+K06744+K16350
Environmental Information Processing	Signal transduction	NF-kappa B signaling pathway	14	92	2.0227e-05	0.000353299	ko04064	ENSRNOG00000005731;ENSRNOG00000007664;ENSRNOG00000008180;ENSRNOG00000009705;ENSRNOG00000012061;ENSRNOG00000012160;ENSRNOG00000013967;ENSRNOG00000017181;ENSRNOG00000018488;ENSRNOG00000019057;ENSRNOG00000023258;ENSRNOG00000049179;ENSRNOG00000051986;ENSRNOG00000052407	K16060+K05151+K05854+K05856+K19662+K05855+K07371+K07369+K03160+K18052+K02580+K10130+K05859+K07370
Human Diseases	Immune diseases	Inflammatiory bowel disease (IBD)	11	60	2.66236e-05	0.000435962	ko05321	ENSRNOG00000000451;ENSRNOG00000000454;ENSRNOG00000003954;ENSRNOG00000007270;ENSRNOG00000015441;ENSRNOG00000015773;ENSRNOG00000023258;ENSRNOG00000026762;ENSRNOG00000032708;ENSRNOG00000032844;ENSRNOG00000033215	K06752+K06752+K05070+K05064+K05071+K05075+K02580+K06752+K06752+K06752+K06752
Human Diseases	Cancers	Pathways in cancer	41	517	3.09731e-05	0.000477351	ko05200	ENSRNOG00000001518;ENSRNOG00000002079;ENSRNOG00000003491;ENSRNOG00000003866;ENSRNOG00000003954;ENSRNOG00000005053;ENSRNOG00000005342;ENSRNOG00000005404;ENSRNOG00000005731;ENSRNOG00000005954;ENSRNOG00000007270;ENSRNOG00000008022;ENSRNOG00000008941;ENSRNOG00000010121;ENSRNOG00000011589;ENSRNOG00000012061;ENSRNOG00000012439;ENSRNOG00000012912;ENSRNOG00000013397;ENSRNOG00000013529;ENSRNOG00000013574;…	K06485+K04440+K02677+K04189+K05070+K09592+K08015+K04350+K16060+K05067+K05064+K02084+K02678+K04492+K04515+K19662+K04726+K04358+K07201+K04411+K08733+K08736+K06055+K03176+K10056+K05071+K01398+K00922+K12361+K06476+K04358+K02580+K11221+K00799+K04236+K08049+K00182+K05859+K19663+K05092+K05072
Organismal Systems	Sensory system	Inflammatory mediator regulation of TRP channels	15	109	3.51049e-05	0.000510972	ko04750	ENSRNOG00000001804;ENSRNOG00000002079;ENSRNOG00000003491;ENSRNOG00000004437;ENSRNOG00000011589;ENSRNOG00000012061;ENSRNOG00000013953;ENSRNOG00000015603;ENSRNOG00000016846;ENSRNOG00000019057;ENSRNOG00000026764;ENSRNOG00000027037;ENSRNOG00000049768;ENSRNOG00000051986;ENSRNOG00000054371	K04959+K04440+K02677+K04433+K04515+K19662+K03176+K18050+K00922+K18052+K16342+K00458+K08049+K05859+K19663
Environmental Information Processing	Signal transduction	MAPK signaling pathway	27	292	6.10025e-05	0.000805923	ko04010	ENSRNOG00000002079;ENSRNOG00000003491;ENSRNOG00000004003;ENSRNOG00000004437;ENSRNOG00000004726;ENSRNOG00000005404;ENSRNOG00000007048;ENSRNOG00000007887;ENSRNOG00000008704;ENSRNOG00000012061;ENSRNOG00000012912;ENSRNOG00000013177;ENSRNOG00000013529;ENSRNOG00000013862;ENSRNOG00000013953;ENSRNOG00000014061;ENSRNOG00000016378;ENSRNOG00000016810;ENSRNOG00000018378;ENSRNOG00000020505;ENSRNOG00000021098;…	K04440+K02677+K20216+K04433+K04443+K04350+K07836+K04376+K04468+K19662+K04358+K04416+K04411+K04459+K03176+K04459+K04415+K04381+K04863+K04408+K12361+K04358+K02580+K16342+K04410+K19663+K05092
Environmental Information Processing	Signal transduction	Ras signaling pathway	23	229	6.15208e-05	0.000805923	ko04014	ENSRNOG00000001374;ENSRNOG00000002079;ENSRNOG00000003491;ENSRNOG00000005342;ENSRNOG00000005404;ENSRNOG00000005509;ENSRNOG00000007048;ENSRNOG00000008941;ENSRNOG00000012061;ENSRNOG00000012912;ENSRNOG00000013529;ENSRNOG00000013953;ENSRNOG00000016846;ENSRNOG00000016945;ENSRNOG00000017671;ENSRNOG00000021098;ENSRNOG00000022631;ENSRNOG00000023258;ENSRNOG00000026764;ENSRNOG00000048597;ENSRNOG00000051986;…	K17632+K04440+K02677+K08015+K04350+K05736+K07836+K02678+K19662+K04358+K04411+K03176+K00922+K01047+K12380+K12361+K04358+K02580+K16342+K04410+K05859+K19663+K05092
Human Diseases	Infectious diseases	Toxoplasmosis	14	108	0.000123837	0.00154502	ko05145	ENSRNOG00000000451;ENSRNOG00000000454;ENSRNOG00000001518;ENSRNOG00000002079;ENSRNOG00000002659;ENSRNOG00000004437;ENSRNOG00000005731;ENSRNOG00000009385;ENSRNOG00000018488;ENSRNOG00000023258;ENSRNOG00000026762;ENSRNOG00000032708;ENSRNOG00000032844;ENSRNOG00000033215	K06752+K06752+K06485+K04440+K08060+K04433+K16060+K21289+K03160+K02580+K06752+K06752+K06752+K06752
Cellular Processes	Cellular community - eukaryotes	Focal adhesion	20	199	0.00018418	0.00213268	ko04510	ENSRNOG00000001518;ENSRNOG00000002079;ENSRNOG00000003491;ENSRNOG00000005509;ENSRNOG00000005731;ENSRNOG00000007048;ENSRNOG00000007422;ENSRNOG00000010663;ENSRNOG00000012061;ENSRNOG00000016846;ENSRNOG00000019689;ENSRNOG00000020246;ENSRNOG00000022071;ENSRNOG00000023007;ENSRNOG00000045829;ENSRNOG00000048472;ENSRNOG00000048597;ENSRNOG00000050430;ENSRNOG00000052064;ENSRNOG00000054371	K06485+K04440+K02677+K05736+K16060+K07836+K05730+K06238+K19662+K00922+K03900+K12755+K06476+K06238+K16857+K04659+K04410+K05730+K06275+K19663
Environmental Information Processing	Signal transduction	Calcium signaling pathway	19	184	0.00018722	0.00213268	ko04020	ENSRNOG00000001427;ENSRNOG00000001804;ENSRNOG00000002969;ENSRNOG00000003069;ENSRNOG00000003491;ENSRNOG00000003866;ENSRNOG00000008514;ENSRNOG00000011589;ENSRNOG00000012061;ENSRNOG00000014290;ENSRNOG00000017606;ENSRNOG00000017912;ENSRNOG00000018260;ENSRNOG00000020425;ENSRNOG00000020585;ENSRNOG00000027839;ENSRNOG00000049768;ENSRNOG00000051986;ENSRNOG00000054371	K16057+K04959+K00911+K01242+K02677+K04189+K05861+K04515+K19662+K04603+K05215+K05853+K04150+K16059+K04264+K05871+K08049+K05859+K19663
Human Diseases	Immune diseases	Allograft rejection	9	52	0.000229162	0.00250168	ko05330	ENSRNOG00000000451;ENSRNOG00000000454;ENSRNOG00000018488;ENSRNOG00000026762;ENSRNOG00000029386;ENSRNOG00000031090;ENSRNOG00000032708;ENSRNOG00000032844;ENSRNOG00000033215	K06752+K06752+K03160+K06752+K06751+K06751+K06752+K06752+K06752
Organismal Systems	Immune system	Chemokine signaling pathway	18	174	0.000269455	0.00280374	ko04062	ENSRNOG00000002829;ENSRNOG00000003866;ENSRNOG00000006620;ENSRNOG00000007048;ENSRNOG00000007422;ENSRNOG00000008180;ENSRNOG00000010665;ENSRNOG00000012061;ENSRNOG00000016278;ENSRNOG00000016846;ENSRNOG00000018985;ENSRNOG00000021098;ENSRNOG00000023258;ENSRNOG00000027839;ENSRNOG00000028015;ENSRNOG00000031081;ENSRNOG00000049768;ENSRNOG00000050430	K10029+K04189+K04193+K07836+K05730+K05854+K04182+K19662+K21083+K00922+K00910+K12361+K02580+K05871+K05407+K11221+K08049+K05730
Organismal Systems	Immune system	Antigen processing and presentation	11	77	0.000278234	0.00280374	ko04612	ENSRNOG00000000451;ENSRNOG00000000454;ENSRNOG00000002659;ENSRNOG00000007129;ENSRNOG00000018735;ENSRNOG00000026762;ENSRNOG00000029386;ENSRNOG00000031090;ENSRNOG00000032708;ENSRNOG00000032844;ENSRNOG00000033215	K06752+K06752+K08060+K06459+K06505+K06752+K06751+K06751+K06752+K06752+K06752
Environmental Information Processing	Signaling molecules and interaction	ECM-receptor interaction	11	81	0.000436142	0.00418311	ko04512	ENSRNOG00000001518;ENSRNOG00000010015;ENSRNOG00000010663;ENSRNOG00000019689;ENSRNOG00000022071;ENSRNOG00000023007;ENSRNOG00000025959;ENSRNOG00000045829;ENSRNOG00000046981;ENSRNOG00000047204;ENSRNOG00000048472	K06485+K06263+K06238+K03900+K06476+K06238+K06261+K16857+K06262+K06264+K04659
Human Diseases	Infectious diseases	Tuberculosis	17	166	0.00044705	0.00418311	ko05152	ENSRNOG00000000451;ENSRNOG00000000454;ENSRNOG00000002079;ENSRNOG00000002659;ENSRNOG00000008022;ENSRNOG00000011589;ENSRNOG00000012160;ENSRNOG00000012439;ENSRNOG00000017181;ENSRNOG00000018735;ENSRNOG00000019430;ENSRNOG00000023258;ENSRNOG00000026762;ENSRNOG00000032708;ENSRNOG00000032844;ENSRNOG00000033215;ENSRNOG00000048161	K06752+K06752+K04440+K08060+K02084+K04515+K05855+K04726+K07369+K06505+K13882+K02580+K06752+K06752+K06752+K06752+K10161
Human Diseases	Immune diseases	Autoimmune thyroid disease	9	59	0.000607957	0.00549258	ko05320	ENSRNOG00000000451;ENSRNOG00000000454;ENSRNOG00000018488;ENSRNOG00000026762;ENSRNOG00000029386;ENSRNOG00000031090;ENSRNOG00000032708;ENSRNOG00000032844;ENSRNOG00000033215	K06752+K06752+K03160+K06752+K06751+K06751+K06752+K06752+K06752
Human Diseases	Cardiovascular diseases	Viral myocarditis	10	72	0.000659339	0.00559385	ko05416	ENSRNOG00000000451;ENSRNOG00000000454;ENSRNOG00000012439;ENSRNOG00000018488;ENSRNOG00000026762;ENSRNOG00000029386;ENSRNOG00000031090;ENSRNOG00000032708;ENSRNOG00000032844;ENSRNOG00000033215	K06752+K06752+K04726+K03160+K06752+K06751+K06751+K06752+K06752+K06752
Human Diseases	Infectious diseases	HTLV-I infection	23	269	0.000661867	0.00559385	ko05166	ENSRNOG00000000451;ENSRNOG00000000454;ENSRNOG00000003954;ENSRNOG00000007664;ENSRNOG00000007887;ENSRNOG00000008941;ENSRNOG00000009705;ENSRNOG00000013177;ENSRNOG00000015945;ENSRNOG00000015994;ENSRNOG00000016846;ENSRNOG00000018488;ENSRNOG00000023258;ENSRNOG00000026762;ENSRNOG00000029386;ENSRNOG00000031090;ENSRNOG00000032708;ENSRNOG00000032844;ENSRNOG00000033215;ENSRNOG00000049768;ENSRNOG00000051499;…	K06752+K06752+K05070+K05151+K04376+K02678+K05856+K04416+K06452+K06450+K00922+K03160+K02580+K06752+K06751+K06751+K06752+K06752+K06752+K08049+K09063+K00182+K09420
Organismal Systems	Digestive system	Pancreatic secretion	12	99	0.000696928	0.0057061	ko04972	ENSRNOG00000001804;ENSRNOG00000003064;ENSRNOG00000003069;ENSRNOG00000003134;ENSRNOG00000003491;ENSRNOG00000007048;ENSRNOG00000012061;ENSRNOG00000012176;ENSRNOG00000016945;ENSRNOG00000017912;ENSRNOG00000049768;ENSRNOG00000054371	K04959+K18152+K01242+K13575+K02677+K07836+K19662+K07886+K01047+K05853+K08049+K19663
Organismal Systems	Nervous system	Long-term depression	9	61	0.00078071	0.00619836	ko04730	ENSRNOG00000001313;ENSRNOG00000001804;ENSRNOG00000003491;ENSRNOG00000008180;ENSRNOG00000009440;ENSRNOG00000012061;ENSRNOG00000014290;ENSRNOG00000026764;ENSRNOG00000054371	K04535+K04959+K02677+K05854+K12319+K19662+K04603+K16342+K19663
Organismal Systems	Nervous system	Glutamatergic synapse	13	115	0.000826694	0.00637041	ko04724	ENSRNOG00000001575;ENSRNOG00000001804;ENSRNOG00000003491;ENSRNOG00000005291;ENSRNOG00000005662;ENSRNOG00000012061;ENSRNOG00000014290;ENSRNOG00000014816;ENSRNOG00000018985;ENSRNOG00000021468;ENSRNOG00000026764;ENSRNOG00000049768;ENSRNOG00000054371	K05201+K04959+K02677+K14990+K04608+K19662+K04603+K05612+K00910+K04608+K16342+K08049+K19663
Human Diseases	Immune diseases	Graft-versus-host disease	8	50	0.000880135	0.00658844	ko05332	ENSRNOG00000000451;ENSRNOG00000000454;ENSRNOG00000026762;ENSRNOG00000029386;ENSRNOG00000031090;ENSRNOG00000032708;ENSRNOG00000032844;ENSRNOG00000033215	K06752+K06752+K06752+K06751+K06751+K06752+K06752+K06752
Organismal Systems	Immune system	Natural killer cell mediated cytotoxicity	13	118	0.00105401	0.00762959	ko04650	ENSRNOG00000003491;ENSRNOG00000007422;ENSRNOG00000009705;ENSRNOG00000012061;ENSRNOG00000012160;ENSRNOG00000012439;ENSRNOG00000016846;ENSRNOG00000027839;ENSRNOG00000029386;ENSRNOG00000031090;ENSRNOG00000050430;ENSRNOG00000051986;ENSRNOG00000054371	K02677+K05730+K05856+K19662+K05855+K04726+K00922+K05871+K06751+K06751+K05730+K05859+K19663
Organismal Systems	Endocrine system	GnRH signaling pathway	11	90	0.00107746	0.00762959	ko04912	ENSRNOG00000001804;ENSRNOG00000002079;ENSRNOG00000003491;ENSRNOG00000004437;ENSRNOG00000011589;ENSRNOG00000012061;ENSRNOG00000013177;ENSRNOG00000016695;ENSRNOG00000026764;ENSRNOG00000027839;ENSRNOG00000049768	K04959+K04440+K02677+K04433+K04515+K19662+K04416+K01398+K16342+K05871+K08049
Environmental Information Processing	Signal transduction	ErbB signaling pathway	10	85	0.00240288	0.0165672	ko04012	ENSRNOG00000002079;ENSRNOG00000003491;ENSRNOG00000005509;ENSRNOG00000011589;ENSRNOG00000012061;ENSRNOG00000016846;ENSRNOG00000017155;ENSRNOG00000048597;ENSRNOG00000051986;ENSRNOG00000054371	K04440+K02677+K05736+K04515+K19662+K00922+K19862+K04410+K05859+K19663
Human Diseases	Endocrine and metabolic diseases	Type I diabetes mellitus	8	59	0.00263937	0.0177311	ko04940	ENSRNOG00000000451;ENSRNOG00000000454;ENSRNOG00000026762;ENSRNOG00000029386;ENSRNOG00000031090;ENSRNOG00000032708;ENSRNOG00000032844;ENSRNOG00000033215	K06752+K06752+K06752+K06751+K06751+K06752+K06752+K06752
Human Diseases	Endocrine and metabolic diseases	AGE-RAGE signaling pathway in diabetic complications	11	101	0.00275801	0.0178451	ko04933	ENSRNOG00000002079;ENSRNOG00000003357;ENSRNOG00000003491;ENSRNOG00000012061;ENSRNOG00000013397;ENSRNOG00000015603;ENSRNOG00000016695;ENSRNOG00000016846;ENSRNOG00000023258;ENSRNOG00000048706;ENSRNOG00000051986	K04440+K19720+K02677+K19662+K07201+K18050+K01398+K00922+K02580+K08008+K05859
Environmental Information Processing	Signal transduction	Phospholipase D signaling pathway	14	147	0.00279255	0.0178451	ko04072	ENSRNOG00000001796;ENSRNOG00000003491;ENSRNOG00000005662;ENSRNOG00000009385;ENSRNOG00000012160;ENSRNOG00000014290;ENSRNOG00000016846;ENSRNOG00000017737;ENSRNOG00000021468;ENSRNOG00000023238;ENSRNOG00000026764;ENSRNOG00000027839;ENSRNOG00000049768;ENSRNOG00000051986	K00901+K02677+K04608+K21289+K05855+K04603+K00922+K00901+K04608+K00901+K16342+K05871+K08049+K05859
Metabolism	Carbohydrate metabolism	Inositol phosphate metabolism	9	74	0.00311975	0.0194613	ko00562	ENSRNOG00000002969;ENSRNOG00000008514;ENSRNOG00000009385;ENSRNOG00000016846;ENSRNOG00000017020;ENSRNOG00000017635;ENSRNOG00000020388;ENSRNOG00000029938;ENSRNOG00000051986	K00911+K05861+K21289+K00922+K03084+K01106+K21798+K00923+K05859
Organismal Systems	Digestive system	Salivary secretion	9	75	0.00342051	0.0208413	ko04970	ENSRNOG00000001804;ENSRNOG00000003064;ENSRNOG00000003069;ENSRNOG00000003491;ENSRNOG00000009440;ENSRNOG00000012061;ENSRNOG00000014714;ENSRNOG00000049768;ENSRNOG00000054371	K04959+K18152+K01242+K02677+K12319+K19662+K04975+K08049+K19663
Organismal Systems	Circulatory system	Vascular smooth muscle contraction	12	121	0.00394546	0.0234396	ko04270	ENSRNOG00000001804;ENSRNOG00000003491;ENSRNOG00000009440;ENSRNOG00000012061;ENSRNOG00000015603;ENSRNOG00000016945;ENSRNOG00000017767;ENSRNOG00000019057;ENSRNOG00000020246;ENSRNOG00000026764;ENSRNOG00000049768;ENSRNOG00000054371	K04959+K02677+K12319+K19662+K18050+K01047+K12337+K18052+K12755+K16342+K08049+K19663
Human Diseases	Infectious diseases	Staphylococcus aureus infection	7	50	0.00402588	0.0234396	ko05150	ENSRNOG00000000451;ENSRNOG00000000454;ENSRNOG00000002794;ENSRNOG00000026762;ENSRNOG00000032708;ENSRNOG00000032844;ENSRNOG00000033215	K06752+K06752+K06496+K06752+K06752+K06752+K06752
Organismal Systems	Digestive system	Protein digestion and absorption	10	93	0.00464899	0.026479	ko04974	ENSRNOG00000001229;ENSRNOG00000003357;ENSRNOG00000004009;ENSRNOG00000010663;ENSRNOG00000014816;ENSRNOG00000020525;ENSRNOG00000023007;ENSRNOG00000026415;ENSRNOG00000030763;ENSRNOG00000039197	K06823+K19720+K14208+K06238+K05612+K19721+K06238+K08133+K01278+K08135
Organismal Systems	Immune system	C-type lectin receptor signaling pathway	11	109	0.00498071	0.0273924	ko04625	ENSRNOG00000001804;ENSRNOG00000002079;ENSRNOG00000004726;ENSRNOG00000012160;ENSRNOG00000016278;ENSRNOG00000016846;ENSRNOG00000017181;ENSRNOG00000023258;ENSRNOG00000031081;ENSRNOG00000051986;ENSRNOG00000057335	K04959+K04440+K04443+K05855+K21083+K00922+K07369+K02580+K11221+K05859+K10070
Human Diseases	Substance dependence	Morphine addiction	10	94	0.00501845	0.0273924	ko05032	ENSRNOG00000003491;ENSRNOG00000003512;ENSRNOG00000005905;ENSRNOG00000008431;ENSRNOG00000012061;ENSRNOG00000018985;ENSRNOG00000025042;ENSRNOG00000032417;ENSRNOG00000049768;ENSRNOG00000054371	K02677+K05175+K13293+K04615+K19662+K00910+K19021+K05189+K08049+K19663
Human Diseases	Infectious diseases	Leishmaniasis	8	66	0.00533529	0.0280738	ko05140	ENSRNOG00000000451;ENSRNOG00000000454;ENSRNOG00000012061;ENSRNOG00000023258;ENSRNOG00000026762;ENSRNOG00000032708;ENSRNOG00000032844;ENSRNOG00000033215	K06752+K06752+K19662+K02580+K06752+K06752+K06752+K06752
Human Diseases	Infectious diseases	Influenza A	14	158	0.0053576	0.0280738	ko05164	ENSRNOG00000000451;ENSRNOG00000000454;ENSRNOG00000002079;ENSRNOG00000002659;ENSRNOG00000003491;ENSRNOG00000004437;ENSRNOG00000012061;ENSRNOG00000016846;ENSRNOG00000023258;ENSRNOG00000026762;ENSRNOG00000031081;ENSRNOG00000032708;ENSRNOG00000032844;ENSRNOG00000033215	K06752+K06752+K04440+K08060+K02677+K04433+K19662+K00922+K02580+K06752+K11221+K06752+K06752+K06752
Environmental Information Processing	Signaling molecules and interaction	Cytokine-cytokine receptor interaction	20	265	0.00618666	0.0317824	ko04060	ENSRNOG00000002304;ENSRNOG00000002829;ENSRNOG00000002968;ENSRNOG00000003866;ENSRNOG00000003954;ENSRNOG00000004470;ENSRNOG00000005954;ENSRNOG00000006620;ENSRNOG00000007270;ENSRNOG00000007664;ENSRNOG00000009316;ENSRNOG00000010665;ENSRNOG00000011680;ENSRNOG00000015441;ENSRNOG00000015773;ENSRNOG00000016278;ENSRNOG00000018488;ENSRNOG00000028015;ENSRNOG00000028377;ENSRNOG00000058446	K05150+K10029+K05469+K04189+K05070+K22668+K05067+K04193+K05064+K05151+K22670+K04182+K22628+K05071+K05075+K21083+K03160+K05407+K05082+K05072
Environmental Information Processing	Signal transduction	PI3K-Akt signaling pathway	24	341	0.00677314	0.0341262	ko04151	ENSRNOG00000001518;ENSRNOG00000003491;ENSRNOG00000003954;ENSRNOG00000004131;ENSRNOG00000009385;ENSRNOG00000010663;ENSRNOG00000012160;ENSRNOG00000012912;ENSRNOG00000013309;ENSRNOG00000013953;ENSRNOG00000015441;ENSRNOG00000016846;ENSRNOG00000018311;ENSRNOG00000019689;ENSRNOG00000022071;ENSRNOG00000022631;ENSRNOG00000023007;ENSRNOG00000023258;ENSRNOG00000028616;ENSRNOG00000045829;ENSRNOG00000048472;…	K06485+K02677+K05070+K06071+K21289+K06238+K05855+K04358+K12230+K03176+K05071+K00922+K06465+K03900+K06476+K04358+K06238+K02580+K01596+K16857+K04659+K05092+K09420+K05072
Environmental Information Processing	Signal transduction	VEGF signaling pathway	7	57	0.00834804	0.0412677	ko04370	ENSRNOG00000003491;ENSRNOG00000004726;ENSRNOG00000012061;ENSRNOG00000016846;ENSRNOG00000026764;ENSRNOG00000051986;ENSRNOG00000054371	K02677+K04443+K19662+K00922+K16342+K05859+K19663
Cellular Processes	Transport and catabolism	Phagosome	14	167	0.00864326	0.0419358	ko04145	ENSRNOG00000000451;ENSRNOG00000000454;ENSRNOG00000019430;ENSRNOG00000022480;ENSRNOG00000026762;ENSRNOG00000029386;ENSRNOG00000031090;ENSRNOG00000032708;ENSRNOG00000032844;ENSRNOG00000033215;ENSRNOG00000045829;ENSRNOG00000046151;ENSRNOG00000048169;ENSRNOG00000048472	K06752+K06752+K13882+K02152+K06752+K06751+K06751+K06752+K06752+K06752+K16857+K07375+K07374+K04659
Organismal Systems	Endocrine system	Oxytocin signaling pathway	13	151	0.00905246	0.0425903	ko04921	ENSRNOG00000001804;ENSRNOG00000003069;ENSRNOG00000003491;ENSRNOG00000009385;ENSRNOG00000009440;ENSRNOG00000011589;ENSRNOG00000012061;ENSRNOG00000017882;ENSRNOG00000018378;ENSRNOG00000020246;ENSRNOG00000026764;ENSRNOG00000049768;ENSRNOG00000054371	K04959+K01242+K02677+K21289+K12319+K04515+K19662+K08794+K04863+K12755+K16342+K08049+K19663
Cellular Processes	Cellular community - eukaryotes	Gap junction	9	87	0.00910326	0.0425903	ko04540	ENSRNOG00000001804;ENSRNOG00000003491;ENSRNOG00000009440;ENSRNOG00000012061;ENSRNOG00000014290;ENSRNOG00000046151;ENSRNOG00000048169;ENSRNOG00000049768;ENSRNOG00000054371	K04959+K02677+K12319+K19662+K04603+K07375+K07374+K08049+K19663
Organismal Systems	Nervous system	GABAergic synapse	9	90	0.0112666	0.05143	ko04727	ENSRNOG00000003491;ENSRNOG00000003512;ENSRNOG00000005291;ENSRNOG00000005697;ENSRNOG00000008431;ENSRNOG00000012061;ENSRNOG00000032417;ENSRNOG00000049768;ENSRNOG00000054371	K02677+K05175+K14990+K05039+K04615+K19662+K05189+K08049+K19663
Organismal Systems	Nervous system	Serotonergic synapse	11	122	0.0113853	0.05143	ko04726	ENSRNOG00000001804;ENSRNOG00000003476;ENSRNOG00000003491;ENSRNOG00000003880;ENSRNOG00000007415;ENSRNOG00000008890;ENSRNOG00000012061;ENSRNOG00000022210;ENSRNOG00000026764;ENSRNOG00000027037;ENSRNOG00000054371	K04959+K05037+K02677+K00502+K00509+K08155+K19662+K08021+K16342+K00458+K19663
Organismal Systems	Development	Osteoclast differentiation	11	124	0.0127663	0.0551695	ko04380	ENSRNOG00000002079;ENSRNOG00000004437;ENSRNOG00000009705;ENSRNOG00000012160;ENSRNOG00000013967;ENSRNOG00000016846;ENSRNOG00000023258;ENSRNOG00000031081;ENSRNOG00000048706;ENSRNOG00000051986;ENSRNOG00000052407	K04440+K04433+K05856+K05855+K07371+K00922+K02580+K11221+K08008+K05859+K07370
Environmental Information Processing	Signal transduction	FoxO signaling pathway	11	124	0.0127663	0.0551695	ko04068	ENSRNOG00000002079;ENSRNOG00000002089;ENSRNOG00000004623;ENSRNOG00000004630;ENSRNOG00000008704;ENSRNOG00000013397;ENSRNOG00000013529;ENSRNOG00000014290;ENSRNOG00000016846;ENSRNOG00000028616;ENSRNOG00000058446	K04440+K10146+K10988+K10628+K04468+K07201+K04411+K04603+K00922+K01596+K05072
Environmental Information Processing	Signal transduction	cAMP signaling pathway	15	193	0.0129782	0.0551695	ko04024	ENSRNOG00000002079;ENSRNOG00000004317;ENSRNOG00000005905;ENSRNOG00000006084;ENSRNOG00000007048;ENSRNOG00000007422;ENSRNOG00000008431;ENSRNOG00000011589;ENSRNOG00000016846;ENSRNOG00000020246;ENSRNOG00000023258;ENSRNOG00000025042;ENSRNOG00000046449;ENSRNOG00000049768;ENSRNOG00000050430	K04440+K04590+K13293+K04953+K07836+K05730+K04615+K04515+K00922+K12755+K02580+K19021+K05232+K08049+K05730
Cellular Processes	Cell motility	Regulation of actin cytoskeleton	16	211	0.0130554	0.0551695	ko04810	ENSRNOG00000001518;ENSRNOG00000003866;ENSRNOG00000005509;ENSRNOG00000006557;ENSRNOG00000007422;ENSRNOG00000012002;ENSRNOG00000012912;ENSRNOG00000014317;ENSRNOG00000016846;ENSRNOG00000020246;ENSRNOG00000022071;ENSRNOG00000022631;ENSRNOG00000030118;ENSRNOG00000036829;ENSRNOG00000048597;ENSRNOG00000050430	K06485+K04189+K05736+K05749+K05730+K16848+K04358+K05754+K00922+K12755+K06476+K04358+K05763+K05750+K04410+K05730
Organismal Systems	Endocrine system	Aldosterone synthesis and secretion	9	93	0.0137941	0.0571779	ko04925	ENSRNOG00000001804;ENSRNOG00000003491;ENSRNOG00000011589;ENSRNOG00000012061;ENSRNOG00000015603;ENSRNOG00000016434;ENSRNOG00000017882;ENSRNOG00000049768;ENSRNOG00000054371	K04959+K02677+K04515+K19662+K18050+K06070+K08794+K08049+K19663
Human Diseases	Cancers	Non-small cell lung cancer	7	63	0.0141854	0.0571779	ko05223	ENSRNOG00000003491;ENSRNOG00000005342;ENSRNOG00000012061;ENSRNOG00000013529;ENSRNOG00000016846;ENSRNOG00000051986;ENSRNOG00000054371	K02677+K08015+K19662+K04411+K00922+K05859+K19663
Organismal Systems	Nervous system	Long-term potentiation	7	63	0.0141854	0.0571779	ko04720	ENSRNOG00000001804;ENSRNOG00000003491;ENSRNOG00000007048;ENSRNOG00000011589;ENSRNOG00000012061;ENSRNOG00000014290;ENSRNOG00000054371	K04959+K02677+K07836+K04515+K19662+K04603+K19663
Genetic Information Processing	Replication and repair	Non-homologous end-joining	3	13	0.014432	0.0572905	ko03450	ENSRNOG00000013615;ENSRNOG00000013647;ENSRNOG00000014605	K00977+K03513+K10777
Human Diseases	Cancers	Transcriptional misregulation in cancers	14	179	0.0152988	0.059825	ko05202	ENSRNOG00000004606;ENSRNOG00000005731;ENSRNOG00000005984;ENSRNOG00000007887;ENSRNOG00000008904;ENSRNOG00000013397;ENSRNOG00000013953;ENSRNOG00000015380;ENSRNOG00000018488;ENSRNOG00000023258;ENSRNOG00000024729;ENSRNOG00000042581;ENSRNOG00000051499;ENSRNOG00000054764	K15613+K16060+K03211+K04376+K09436+K07201+K03176+K10056+K03160+K02580+K09383+K06056+K09063+K05092
Human Diseases	Cancers	Choline metabolism in cancer	9	95	0.0156978	0.0604828	ko05231	ENSRNOG00000001796;ENSRNOG00000002079;ENSRNOG00000003491;ENSRNOG00000012061;ENSRNOG00000016846;ENSRNOG00000017737;ENSRNOG00000023238;ENSRNOG00000026764;ENSRNOG00000054371	K00901+K04440+K02677+K19662+K00922+K00901+K00901+K16342+K19663
Human Diseases	Infectious diseases	Malaria	6	51	0.0173806	0.0659958	ko05144	ENSRNOG00000002794;ENSRNOG00000018488;ENSRNOG00000045829;ENSRNOG00000048161;ENSRNOG00000048472;ENSRNOG00000057410	K06496+K03160+K16857+K10161+K04659+K06543
Human Diseases	Cancers	Proteoglycans in cancer	15	203	0.019741	0.0738877	ko05205	ENSRNOG00000001804;ENSRNOG00000002188;ENSRNOG00000003491;ENSRNOG00000007422;ENSRNOG00000011076;ENSRNOG00000011589;ENSRNOG00000012002;ENSRNOG00000012061;ENSRNOG00000016695;ENSRNOG00000016846;ENSRNOG00000030118;ENSRNOG00000045829;ENSRNOG00000051905;ENSRNOG00000051986;ENSRNOG00000054371	K04959+K07964+K02677+K05730+K10380+K04515+K16848+K19662+K01398+K00922+K05763+K16857+K00182+K05859+K19663
Cellular Processes	Cell growth and death	Apoptosis	11	133	0.0206072	0.0753758	ko04210	ENSRNOG00000001804;ENSRNOG00000002079;ENSRNOG00000005731;ENSRNOG00000008022;ENSRNOG00000012439;ENSRNOG00000013953;ENSRNOG00000016846;ENSRNOG00000023258;ENSRNOG00000025742;ENSRNOG00000048169;ENSRNOG00000049179	K04959+K04440+K16060+K02084+K04726+K03176+K00922+K02580+K07611+K07374+K10130
Organismal Systems	Excretory system	Aldosterone-regulated sodium reabsorption	5	39	0.020714	0.0753758	ko04960	ENSRNOG00000003491;ENSRNOG00000012061;ENSRNOG00000016846;ENSRNOG00000034007;ENSRNOG00000054371	K02677+K19662+K00922+K08555+K19663
Environmental Information Processing	Signal transduction	Rap1 signaling pathway	15	205	0.0213675	0.0766889	ko04015	ENSRNOG00000003491;ENSRNOG00000004437;ENSRNOG00000005342;ENSRNOG00000007048;ENSRNOG00000012061;ENSRNOG00000012912;ENSRNOG00000016434;ENSRNOG00000016846;ENSRNOG00000021098;ENSRNOG00000022071;ENSRNOG00000022631;ENSRNOG00000045829;ENSRNOG00000048186;ENSRNOG00000049768;ENSRNOG00000054371	K02677+K04433+K08015+K07836+K19662+K04358+K06070+K00922+K12361+K06476+K04358+K16857+K04236+K08049+K19663
Human Diseases	Infectious diseases	Kaposi sarcoma-associated herpesvirus infection	14	190	0.0243498	0.0862113	ko05167	ENSRNOG00000001804;ENSRNOG00000002079;ENSRNOG00000004437;ENSRNOG00000004726;ENSRNOG00000008180;ENSRNOG00000009385;ENSRNOG00000012160;ENSRNOG00000012439;ENSRNOG00000016846;ENSRNOG00000023258;ENSRNOG00000029386;ENSRNOG00000031081;ENSRNOG00000031090;ENSRNOG00000051986	K04959+K04440+K04433+K04443+K05854+K21289+K05855+K04726+K00922+K02580+K06751+K11221+K06751+K05859
Organismal Systems	Nervous system	Neurotrophin signaling pathway	10	120	0.0254044	0.0887461	ko04722	ENSRNOG00000002079;ENSRNOG00000004726;ENSRNOG00000007048;ENSRNOG00000011589;ENSRNOG00000013177;ENSRNOG00000013953;ENSRNOG00000016846;ENSRNOG00000023258;ENSRNOG00000028198;ENSRNOG00000051986	K04440+K04443+K07836+K04515+K04416+K03176+K00922+K02580+K12459+K05859
Metabolism	Glycan biosynthesis and metabolism	Glycosphingolipid biosynthesis - lacto and neolacto series	4	28	0.0262224	0.0903984	ko00601	ENSRNOG00000001653;ENSRNOG00000009267;ENSRNOG00000014018;ENSRNOG00000046258	K03792+K00741+K03371+K03766
Human Diseases	Endocrine and metabolic diseases	Insulin resistance	9	104	0.026707	0.0908731	ko04931	ENSRNOG00000002079;ENSRNOG00000012061;ENSRNOG00000013397;ENSRNOG00000015603;ENSRNOG00000016846;ENSRNOG00000017822;ENSRNOG00000019057;ENSRNOG00000023258;ENSRNOG00000028616	K04440+K19662+K07201+K18050+K00922+K15719+K18052+K02580+K01596
Organismal Systems	Development	Axon guidance	13	175	0.0277405	0.0931795	ko04360	ENSRNOG00000003491;ENSRNOG00000003866;ENSRNOG00000005509;ENSRNOG00000006324;ENSRNOG00000011133;ENSRNOG00000011589;ENSRNOG00000013072;ENSRNOG00000013694;ENSRNOG00000014367;ENSRNOG00000016846;ENSRNOG00000017155;ENSRNOG00000048597;ENSRNOG00000051986	K02677+K04189+K05736+K04969+K04967+K04515+K06820+K16359+K05114+K00922+K19862+K04410+K05859
Organismal Systems	Digestive system	Gastric acid secretion	7	74	0.0315756	0.104719	ko04971	ENSRNOG00000001804;ENSRNOG00000003491;ENSRNOG00000011589;ENSRNOG00000012061;ENSRNOG00000018260;ENSRNOG00000049768;ENSRNOG00000054371	K04959+K02677+K04515+K19662+K04150+K08049+K19663
Environmental Information Processing	Signal transduction	cGMP - PKG signaling pathway	12	162	0.0343084	0.11236	ko04022	ENSRNOG00000001804;ENSRNOG00000006324;ENSRNOG00000009385;ENSRNOG00000009440;ENSRNOG00000014443;ENSRNOG00000015603;ENSRNOG00000017767;ENSRNOG00000017912;ENSRNOG00000020246;ENSRNOG00000025042;ENSRNOG00000031778;ENSRNOG00000049768	K04959+K04969+K21289+K12319+K13762+K18050+K12337+K05853+K12755+K19021+K09262+K08049
Human Diseases	Drug resistance	Platinum drug resistance	7	77	0.0380709	0.123143	ko01524	ENSRNOG00000005731;ENSRNOG00000008022;ENSRNOG00000012439;ENSRNOG00000013673;ENSRNOG00000016846;ENSRNOG00000033402;ENSRNOG00000046727	K16060+K02084+K04726+K08736+K00922+K00799+K05666
Metabolism	Metabolism of cofactors and vitamins	Nicotinate and nicotinamide metabolism	4	32	0.0405571	0.127908	ko00760	ENSRNOG00000003064;ENSRNOG00000003069;ENSRNOG00000014555;ENSRNOG00000026842	K18152+K01242+K00157+K00323
Cellular Processes	Cell growth and death	Apoptosis - multiple species	4	32	0.0405571	0.127908	ko04215	ENSRNOG00000002079;ENSRNOG00000005731;ENSRNOG00000008022;ENSRNOG00000012439	K04440+K16060+K02084+K04726
Human Diseases	Infectious diseases	Epstein-Barr virus infection	14	204	0.0410087	0.127908	ko05169	ENSRNOG00000001005;ENSRNOG00000002079;ENSRNOG00000003069;ENSRNOG00000004437;ENSRNOG00000008180;ENSRNOG00000012160;ENSRNOG00000016846;ENSRNOG00000018311;ENSRNOG00000018488;ENSRNOG00000023258;ENSRNOG00000029386;ENSRNOG00000031090;ENSRNOG00000034164;ENSRNOG00000051986	K06468+K04440+K01242+K04433+K05854+K05855+K00922+K06465+K03160+K02580+K06751+K06751+K04012+K05859
Environmental Information Processing	Signal transduction	Jak-STAT signaling pathway	11	150	0.0442672	0.13597	ko04630	ENSRNOG00000003954;ENSRNOG00000004470;ENSRNOG00000005954;ENSRNOG00000007270;ENSRNOG00000014555;ENSRNOG00000015441;ENSRNOG00000015773;ENSRNOG00000016846;ENSRNOG00000028377;ENSRNOG00000031081;ENSRNOG00000058446	K05070+K22668+K05067+K05064+K00157+K05071+K05075+K00922+K05082+K11221+K05072
Human Diseases	Infectious diseases	Hepatitis B	10	132	0.0446315	0.13597	ko05161	ENSRNOG00000002079;ENSRNOG00000003491;ENSRNOG00000008022;ENSRNOG00000012061;ENSRNOG00000013177;ENSRNOG00000016846;ENSRNOG00000023258;ENSRNOG00000027839;ENSRNOG00000031081;ENSRNOG00000054371	K04440+K02677+K02084+K19662+K04416+K00922+K02580+K05871+K11221+K19663
Organismal Systems	Endocrine system	Melanogenesis	8	98	0.0477123	0.143685	ko04916	ENSRNOG00000003491;ENSRNOG00000010121;ENSRNOG00000011589;ENSRNOG00000012061;ENSRNOG00000016421;ENSRNOG00000049768;ENSRNOG00000051905;ENSRNOG00000054371	K02677+K04492+K04515+K19662+K00505+K08049+K00182+K19663
Human Diseases	Substance dependence	Amphetamine addiction	6	65	0.0497094	0.147998	ko05031	ENSRNOG00000003491;ENSRNOG00000008890;ENSRNOG00000011589;ENSRNOG00000012061;ENSRNOG00000020410;ENSRNOG00000054371	K02677+K08155+K04515+K19662+K00501+K19663
