# Supplementary material for: Transcription analyses of differentially expressed mRNAs, lncRNAs, circRNAs, and miRNAs in the growth plate of rats with glucocorticoid-induced growth retardation
Source: PeerJ. 2023 Jan 16;11:e14603. doi: 10.7717/peerj.14603 (PMC9851049; doi:10.7717/peerj.14603)
Supplement: Supplemental Information 7 [file peerj-11-14603-s007.xlsx]

## Sheet: 7d up GO
Table S7. Gene Ontology analysis of up-regulated genes in the Dex 7d group. Terms with p values smaller than 0.05 were regarded as statistically significant enriched. Statistical test method: hypergeometric test / Fisher's exact test. FDR correction method: Benjamini and Hochberg.
Ontology	ID	Term	Input number	p value	Corrected p Value	Genes
CC	GO:0005615	extracellular space	125	1.25401e-18	5.75589e-16	ENSRNOG00000004554, ENSRNOG00000009848, ENSRNOG00000007545, ENSRNOG00000007302, ENSRNOG00000000239, ENSRNOG00000003869, ENSRNOG00000018445, ENSRNOG00000020369, ENSRNOG00000049349, ENSRNOG00000006052, ENSRNOG00000030715, ENSRNOG00000008478, ENSRNOG00000002093, ENSRNOG00000001162, ENSRNOG00000028896, ENSRNOG00000033209, ENSRNOG00000001312, ENSRNOG00000004303, ENSRNOG00000005998, ENSRNOG00000001314,…
CC	GO:0005576	extracellular region	85	9.46715e-18	2.17271e-15	ENSRNOG00000049385, ENSRNOG00000012937, ENSRNOG00000059507, ENSRNOG00000007545, ENSRNOG00000007302, ENSRNOG00000004476, ENSRNOG00000011568, ENSRNOG00000012655, ENSRNOG00000001249, ENSRNOG00000017392, ENSRNOG00000004516, ENSRNOG00000016460, ENSRNOG00000053086, ENSRNOG00000019577, ENSRNOG00000013791, ENSRNOG00000051860, ENSRNOG00000014288, ENSRNOG00000012094, ENSRNOG00000013994, ENSRNOG00000030715,…
CC	GO:0031012	extracellular matrix	45	2.29105e-17	3.5053e-15	ENSRNOG00000049385, ENSRNOG00000004554, ENSRNOG00000002154, ENSRNOG00000007302, ENSRNOG00000008336, ENSRNOG00000002158, ENSRNOG00000003304, ENSRNOG00000001249, ENSRNOG00000012655, ENSRNOG00000019577, ENSRNOG00000001627, ENSRNOG00000005708, ENSRNOG00000012471, ENSRNOG00000014166, ENSRNOG00000014288, ENSRNOG00000015357, ENSRNOG00000014426, ENSRNOG00000008697, ENSRNOG00000029792, ENSRNOG00000002093,…
MF	GO:0008201	heparin binding	35	2.2944e-17	1.90664e-14	ENSRNOG00000006997, ENSRNOG00000007302, ENSRNOG00000008816, ENSRNOG00000011568, ENSRNOG00000031890, ENSRNOG00000017392, ENSRNOG00000000239, ENSRNOG00000053384, ENSRNOG00000019598, ENSRNOG00000001627, ENSRNOG00000013340, ENSRNOG00000012471, ENSRNOG00000014166, ENSRNOG00000018646, ENSRNOG00000014288, ENSRNOG00000012094, ENSRNOG00000024207, ENSRNOG00000030715, ENSRNOG00000008697, ENSRNOG00000002093,…
BP	GO:0001525	angiogenesis	35	3.71326e-13	1.28962e-09	ENSRNOG00000009848, ENSRNOG00000007545, ENSRNOG00000029658, ENSRNOG00000003544, ENSRNOG00000056836, ENSRNOG00000011568, ENSRNOG00000017392, ENSRNOG00000016182, ENSRNOG00000004912, ENSRNOG00000010233, ENSRNOG00000019598, ENSRNOG00000008292, ENSRNOG00000014288, ENSRNOG00000030715, ENSRNOG00000008697, ENSRNOG00000002093, ENSRNOG00000027145, ENSRNOG00000026053, ENSRNOG00000029768, ENSRNOG00000001312,…
CC	GO:0009986	cell surface	63	1.58405e-11	1.8177e-09	ENSRNOG00000004476, ENSRNOG00000056836, ENSRNOG00000031890, ENSRNOG00000016182, ENSRNOG00000004516, ENSRNOG00000004912, ENSRNOG00000016460, ENSRNOG00000014481, ENSRNOG00000020716, ENSRNOG00000013791, ENSRNOG00000013141, ENSRNOG00000018646, ENSRNOG00000038483, ENSRNOG00000015654, ENSRNOG00000013994, ENSRNOG00000055382, ENSRNOG00000046639, ENSRNOG00000043085, ENSRNOG00000006052, ENSRNOG00000002093,…
MF	GO:0005178	integrin binding	25	2.29205e-10	8.20273e-08	ENSRNOG00000006997, ENSRNOG00000004332, ENSRNOG00000007302, ENSRNOG00000008816, ENSRNOG00000008116, ENSRNOG00000002158, ENSRNOG00000042848, ENSRNOG00000017392, ENSRNOG00000004516, ENSRNOG00000004912, ENSRNOG00000058111, ENSRNOG00000012471, ENSRNOG00000014288, ENSRNOG00000019556, ENSRNOG00000017438, ENSRNOG00000020369, ENSRNOG00000046639, ENSRNOG00000008697, ENSRNOG00000043167, ENSRNOG00000002265,…
MF	GO:0005518	collagen binding	18	2.96127e-10	8.20273e-08	ENSRNOG00000004554, ENSRNOG00000033528, ENSRNOG00000001254, ENSRNOG00000003259, ENSRNOG00000001312, ENSRNOG00000006548, ENSRNOG00000001249, ENSRNOG00000058111, ENSRNOG00000004912, ENSRNOG00000012840, ENSRNOG00000001627, ENSRNOG00000012471, ENSRNOG00000014426, ENSRNOG00000021155, ENSRNOG00000008478, ENSRNOG00000031716, ENSRNOG00000021157, ENSRNOG00000043167
BP	GO:0030198	extracellular matrix organization	27	3.49582e-10	4.14008e-07	ENSRNOG00000049385, ENSRNOG00000006997, ENSRNOG00000008336, ENSRNOG00000002158, ENSRNOG00000001249, ENSRNOG00000012655, ENSRNOG00000019577, ENSRNOG00000001627, ENSRNOG00000005708, ENSRNOG00000014166, ENSRNOG00000014288, ENSRNOG00000018445, ENSRNOG00000014863, ENSRNOG00000008478, ENSRNOG00000023257, ENSRNOG00000002052, ENSRNOG00000028344, ENSRNOG00000012508, ENSRNOG00000002167, ENSRNOG00000005998,…
BP	GO:0001503	ossification	21	3.57623e-10	4.14008e-07	ENSRNOG00000002265, ENSRNOG00000002167, ENSRNOG00000002158, ENSRNOG00000046261, ENSRNOG00000018082, ENSRNOG00000019584, ENSRNOG00000012840, ENSRNOG00000005708, ENSRNOG00000013340, ENSRNOG00000013573, ENSRNOG00000014288, ENSRNOG00000013994, ENSRNOG00000020369, ENSRNOG00000018659, ENSRNOG00000008332, ENSRNOG00000021166, ENSRNOG00000008478, ENSRNOG00000004330, ENSRNOG00000004540, ENSRNOG00000005695,…
MF	GO:0005509	calcium ion binding	57	3.36123e-09	6.98296e-07	ENSRNOG00000061508, ENSRNOG00000007302, ENSRNOG00000008479, ENSRNOG00000054011, ENSRNOG00000011441, ENSRNOG00000013791, ENSRNOG00000014166, ENSRNOG00000012094, ENSRNOG00000013994, ENSRNOG00000043085, ENSRNOG00000006052, ENSRNOG00000008478, ENSRNOG00000047002, ENSRNOG00000029212, ENSRNOG00000006645, ENSRNOG00000010903, ENSRNOG00000033528, ENSRNOG00000006565, ENSRNOG00000012207, ENSRNOG00000005998,…
BP	GO:0030282	bone mineralization	15	5.00438e-09	4.34506e-06	ENSRNOG00000002154, ENSRNOG00000049232, ENSRNOG00000008816, ENSRNOG00000002158, ENSRNOG00000010960, ENSRNOG00000019584, ENSRNOG00000005715, ENSRNOG00000008292, ENSRNOG00000013994, ENSRNOG00000014426, ENSRNOG00000043451, ENSRNOG00000030726, ENSRNOG00000008478, ENSRNOG00000004540, ENSRNOG00000023440
BP	GO:0009615	response to virus	18	1.44144e-08	1.00122e-05	ENSRNOG00000001187, ENSRNOG00000036604, ENSRNOG00000049282, ENSRNOG00000001963, ENSRNOG00000028814, ENSRNOG00000032922, ENSRNOG00000006569, ENSRNOG00000019050, ENSRNOG00000001369, ENSRNOG00000016460, ENSRNOG00000022839, ENSRNOG00000001959, ENSRNOG00000018247, ENSRNOG00000026605, ENSRNOG00000059097, ENSRNOG00000006384, ENSRNOG00000022256, ENSRNOG00000048315
CC	GO:0030424	axon	44	2.0466e-08	1.85049e-06	ENSRNOG00000006997, ENSRNOG00000033835, ENSRNOG00000030149, ENSRNOG00000002176, ENSRNOG00000008479, ENSRNOG00000004438, ENSRNOG00000001963, ENSRNOG00000032922, ENSRNOG00000031890, ENSRNOG00000058111, ENSRNOG00000028708, ENSRNOG00000032884, ENSRNOG00000001528, ENSRNOG00000033099, ENSRNOG00000017438, ENSRNOG00000029071, ENSRNOG00000055382, ENSRNOG00000023337, ENSRNOG00000005063, ENSRNOG00000030715,…
CC	GO:0016324	apical plasma membrane	39	2.41895e-08	1.85049e-06	ENSRNOG00000009848, ENSRNOG00000011826, ENSRNOG00000004332, ENSRNOG00000056836, ENSRNOG00000002832, ENSRNOG00000018082, ENSRNOG00000002959, ENSRNOG00000019752, ENSRNOG00000013791, ENSRNOG00000033192, ENSRNOG00000013573, ENSRNOG00000014288, ENSRNOG00000019556, ENSRNOG00000014961, ENSRNOG00000019937, ENSRNOG00000017976, ENSRNOG00000009620, ENSRNOG00000021155, ENSRNOG00000007284, ENSRNOG00000004077,…
BP	GO:0030335	positive regulation of cell migration	31	2.98904e-08	1.73015e-05	ENSRNOG00000050792, ENSRNOG00000004332, ENSRNOG00000004696, ENSRNOG00000006631, ENSRNOG00000008816, ENSRNOG00000056836, ENSRNOG00000004912, ENSRNOG00000000239, ENSRNOG00000019598, ENSRNOG00000018646, ENSRNOG00000014288, ENSRNOG00000014961, ENSRNOG00000023337, ENSRNOG00000008332, ENSRNOG00000007202, ENSRNOG00000028930, ENSRNOG00000011977, ENSRNOG00000001312, ENSRNOG00000046261, ENSRNOG00000006526,…
BP	GO:0042060	wound healing	22	4.63773e-08	2.30098e-05	ENSRNOG00000004554, ENSRNOG00000004332, ENSRNOG00000005933, ENSRNOG00000008116, ENSRNOG00000001312, ENSRNOG00000056836, ENSRNOG00000012207, ENSRNOG00000002930, ENSRNOG00000056550, ENSRNOG00000017392, ENSRNOG00000016050, ENSRNOG00000016182, ENSRNOG00000058111, ENSRNOG00000012840, ENSRNOG00000019598, ENSRNOG00000018991, ENSRNOG00000014297, ENSRNOG00000014288, ENSRNOG00000020369, ENSRNOG00000014426,…
CC	GO:0005604	basement membrane	19	5.65286e-08	3.70666e-06	ENSRNOG00000049076, ENSRNOG00000059507, ENSRNOG00000003553, ENSRNOG00000007302, ENSRNOG00000002667, ENSRNOG00000004303, ENSRNOG00000005998, ENSRNOG00000001249, ENSRNOG00000012840, ENSRNOG00000019598, ENSRNOG00000012471, ENSRNOG00000014166, ENSRNOG00000014574, ENSRNOG00000014288, ENSRNOG00000016758, ENSRNOG00000005195, ENSRNOG00000002052, ENSRNOG00000006025, ENSRNOG00000005573
BP	GO:0001649	osteoblast differentiation	18	8.09722e-08	3.51521e-05	ENSRNOG00000009848, ENSRNOG00000008816, ENSRNOG00000008943, ENSRNOG00000000138, ENSRNOG00000017392, ENSRNOG00000019584, ENSRNOG00000005715, ENSRNOG00000052469, ENSRNOG00000013994, ENSRNOG00000017987, ENSRNOG00000020369, ENSRNOG00000014426, ENSRNOG00000016617, ENSRNOG00000008332, ENSRNOG00000043451, ENSRNOG00000002093, ENSRNOG00000008478, ENSRNOG00000002381
CC	GO:0016020	membrane	96	1.47566e-07	8.4666e-06	ENSRNOG00000033835, ENSRNOG00000005248, ENSRNOG00000059507, ENSRNOG00000027276, ENSRNOG00000004398, ENSRNOG00000008116, ENSRNOG00000008479, ENSRNOG00000010997, ENSRNOG00000056836, ENSRNOG00000001963, ENSRNOG00000002414, ENSRNOG00000001369, ENSRNOG00000002930, ENSRNOG00000031890, ENSRNOG00000020918, ENSRNOG00000010994, ENSRNOG00000004912, ENSRNOG00000016460, ENSRNOG00000010233, ENSRNOG00000014481,…
BP	GO:0055074	calcium ion homeostasis	12	3.01765e-07	0.000116448	ENSRNOG00000008170, ENSRNOG00000013573, ENSRNOG00000007445, ENSRNOG00000008479, ENSRNOG00000013994, ENSRNOG00000011944, ENSRNOG00000056836, ENSRNOG00000025889, ENSRNOG00000010960, ENSRNOG00000043451, ENSRNOG00000016050, ENSRNOG00000002372
BP	GO:0051216	cartilage development	15	5.57032e-07	0.000193457	ENSRNOG00000012826, ENSRNOG00000003720, ENSRNOG00000006569, ENSRNOG00000010188, ENSRNOG00000052469, ENSRNOG00000008292, ENSRNOG00000013994, ENSRNOG00000056141, ENSRNOG00000025889, ENSRNOG00000027869, ENSRNOG00000030715, ENSRNOG00000006052, ENSRNOG00000008478, ENSRNOG00000002381, ENSRNOG00000005695
MF	GO:0050431	transforming growth factor beta binding	9	9.25182e-07	0.000153765	ENSRNOG00000013340, ENSRNOG00000020871, ENSRNOG00000004912, ENSRNOG00000002093, ENSRNOG00000004330, ENSRNOG00000007036, ENSRNOG00000004141, ENSRNOG00000025332, ENSRNOG00000005033
BP	GO:0007155	cell adhesion	33	9.4885e-07	0.000299578	ENSRNOG00000006997, ENSRNOG00000050792, ENSRNOG00000002176, ENSRNOG00000031852, ENSRNOG00000008816, ENSRNOG00000008116, ENSRNOG00000004438, ENSRNOG00000002158, ENSRNOG00000011789, ENSRNOG00000031890, ENSRNOG00000004912, ENSRNOG00000012471, ENSRNOG00000014288, ENSRNOG00000019556, ENSRNOG00000014961, ENSRNOG00000046639, ENSRNOG00000008697, ENSRNOG00000029212, ENSRNOG00000043167, ENSRNOG00000030515,…
MF	GO:0005539	glycosaminoglycan binding	9	1.31923e-06	0.000182714	ENSRNOG00000004554, ENSRNOG00000014166, ENSRNOG00000016752, ENSRNOG00000004706, ENSRNOG00000006052, ENSRNOG00000002093, ENSRNOG00000002052, ENSRNOG00000001627, ENSRNOG00000015461
BP	GO:0016477	cell migration	28	2.36404e-06	0.000684192	ENSRNOG00000059507, ENSRNOG00000004057, ENSRNOG00000010977, ENSRNOG00000004696, ENSRNOG00000004516, ENSRNOG00000004912, ENSRNOG00000059801, ENSRNOG00000019598, ENSRNOG00000020716, ENSRNOG00000018683, ENSRNOG00000018646, ENSRNOG00000014961, ENSRNOG00000017438, ENSRNOG00000002093, ENSRNOG00000024089, ENSRNOG00000008428, ENSRNOG00000024250, ENSRNOG00000007518, ENSRNOG00000006569, ENSRNOG00000051854,…
BP	GO:0002062	chondrocyte differentiation	13	2.85234e-06	0.000762014	ENSRNOG00000012826, ENSRNOG00000009832, ENSRNOG00000028108, ENSRNOG00000016050, ENSRNOG00000052469, ENSRNOG00000018394, ENSRNOG00000013340, ENSRNOG00000008292, ENSRNOG00000024998, ENSRNOG00000027869, ENSRNOG00000009795, ENSRNOG00000008697, ENSRNOG00000048389
MF	GO:0001968	fibronectin binding	10	2.87198e-06	0.000340945	ENSRNOG00000012471, ENSRNOG00000050792, ENSRNOG00000010977, ENSRNOG00000021155, ENSRNOG00000004912, ENSRNOG00000008478, ENSRNOG00000021157, ENSRNOG00000002052, ENSRNOG00000019598, ENSRNOG00000014297
CC	GO:0005887	integral component of plasma membrane	73	3.33631e-06	0.000170152	ENSRNOG00000005687, ENSRNOG00000056558, ENSRNOG00000003067, ENSRNOG00000047363, ENSRNOG00000008116, ENSRNOG00000008479, ENSRNOG00000056836, ENSRNOG00000003786, ENSRNOG00000018082, ENSRNOG00000010994, ENSRNOG00000016182, ENSRNOG00000020716, ENSRNOG00000018646, ENSRNOG00000015654, ENSRNOG00000014686, ENSRNOG00000013994, ENSRNOG00000019937, ENSRNOG00000055382, ENSRNOG00000002093, ENSRNOG00000004077,…
BP	GO:0008284	positive regulation of cell proliferation	44	4.00629e-06	0.00097965	ENSRNOG00000004730, ENSRNOG00000009848, ENSRNOG00000004332, ENSRNOG00000010997, ENSRNOG00000003745, ENSRNOG00000020918, ENSRNOG00000017392, ENSRNOG00000016182, ENSRNOG00000004912, ENSRNOG00000016460, ENSRNOG00000012499, ENSRNOG00000019598, ENSRNOG00000011441, ENSRNOG00000033192, ENSRNOG00000018646, ENSRNOG00000008292, ENSRNOG00000014288, ENSRNOG00000018445, ENSRNOG00000020369, ENSRNOG00000008332,…
BP	GO:0030514	negative regulation of BMP signaling pathway	12	4.23114e-06	0.00097965	ENSRNOG00000049076, ENSRNOG00000013340, ENSRNOG00000050792, ENSRNOG00000049232, ENSRNOG00000009173, ENSRNOG00000015357, ENSRNOG00000026053, ENSRNOG00000056836, ENSRNOG00000055340, ENSRNOG00000004208, ENSRNOG00000018394, ENSRNOG00000004330
BP	GO:0007399	nervous system development	24	7.51626e-06	0.0016315	ENSRNOG00000006997, ENSRNOG00000011789, ENSRNOG00000004688, ENSRNOG00000052469, ENSRNOG00000019598, ENSRNOG00000020716, ENSRNOG00000001528, ENSRNOG00000052157, ENSRNOG00000012471, ENSRNOG00000018646, ENSRNOG00000014288, ENSRNOG00000014751, ENSRNOG00000014961, ENSRNOG00000017438, ENSRNOG00000023601, ENSRNOG00000023337, ENSRNOG00000017428, ENSRNOG00000007152, ENSRNOG00000004165, ENSRNOG00000002041,…
BP	GO:0060348	bone development	14	9.783e-06	0.00199861	ENSRNOG00000001312, ENSRNOG00000003304, ENSRNOG00000012840, ENSRNOG00000012499, ENSRNOG00000011068, ENSRNOG00000005708, ENSRNOG00000018778, ENSRNOG00000013994, ENSRNOG00000025889, ENSRNOG00000030715, ENSRNOG00000006052, ENSRNOG00000029792, ENSRNOG00000023440, ENSRNOG00000027520
CC	GO:0045202	synapse	45	1.06455e-05	0.000474592	ENSRNOG00000006997, ENSRNOG00000033835, ENSRNOG00000056558, ENSRNOG00000011826, ENSRNOG00000002176, ENSRNOG00000004332, ENSRNOG00000008479, ENSRNOG00000004314, ENSRNOG00000001227, ENSRNOG00000016460, ENSRNOG00000028708, ENSRNOG00000000879, ENSRNOG00000011441, ENSRNOG00000013994, ENSRNOG00000029071, ENSRNOG00000026705, ENSRNOG00000055382, ENSRNOG00000015658, ENSRNOG00000043085, ENSRNOG00000007284,…
CC	GO:0043679	axon terminus	15	1.13737e-05	0.000474592	ENSRNOG00000052486, ENSRNOG00000002265, ENSRNOG00000008428, ENSRNOG00000007159, ENSRNOG00000008479, ENSRNOG00000011107, ENSRNOG00000008943, ENSRNOG00000058111, ENSRNOG00000028708, ENSRNOG00000013213, ENSRNOG00000000879, ENSRNOG00000058006, ENSRNOG00000010260, ENSRNOG00000026705, ENSRNOG00000055382
CC	GO:0005614	interstitial matrix	7	1.43786e-05	0.000549981	ENSRNOG00000014166, ENSRNOG00000049076, ENSRNOG00000049385, ENSRNOG00000004706, ENSRNOG00000031716, ENSRNOG00000002052, ENSRNOG00000001627
BP	GO:0030324	lung development	18	1.48427e-05	0.00286382	ENSRNOG00000009848, ENSRNOG00000004332, ENSRNOG00000003544, ENSRNOG00000009514, ENSRNOG00000017392, ENSRNOG00000016050, ENSRNOG00000012840, ENSRNOG00000052469, ENSRNOG00000019598, ENSRNOG00000016752, ENSRNOG00000014961, ENSRNOG00000014426, ENSRNOG00000054508, ENSRNOG00000009795, ENSRNOG00000005695, ENSRNOG00000007036, ENSRNOG00000048389, ENSRNOG00000023440
BP	GO:0010811	positive regulation of cell-substrate adhesion	10	2.11141e-05	0.00385944	ENSRNOG00000014166, ENSRNOG00000049076, ENSRNOG00000002167, ENSRNOG00000005998, ENSRNOG00000004706, ENSRNOG00000043451, ENSRNOG00000031716, ENSRNOG00000002052, ENSRNOG00000033064, ENSRNOG00000001627
CC	GO:0043025	neuronal cell body	44	2.41905e-05	0.00085411	ENSRNOG00000005248, ENSRNOG00000008479, ENSRNOG00000028404, ENSRNOG00000011107, ENSRNOG00000009329, ENSRNOG00000031890, ENSRNOG00000028708, ENSRNOG00000010233, ENSRNOG00000000814, ENSRNOG00000022946, ENSRNOG00000013141, ENSRNOG00000015654, ENSRNOG00000014686, ENSRNOG00000017438, ENSRNOG00000013994, ENSRNOG00000029071, ENSRNOG00000026705, ENSRNOG00000055382, ENSRNOG00000013656, ENSRNOG00000008332,…
BP	GO:0002053	positive regulation of mesenchymal cell proliferation	9	2.83053e-05	0.00491521	ENSRNOG00000014597, ENSRNOG00000004696, ENSRNOG00000001312, ENSRNOG00000003720, ENSRNOG00000054508, ENSRNOG00000008332, ENSRNOG00000016050, ENSRNOG00000052469, ENSRNOG00000019598
CC	GO:0005925	focal adhesion	20	3.13757e-05	0.00102868	ENSRNOG00000056836, ENSRNOG00000012207, ENSRNOG00000031669, ENSRNOG00000010588, ENSRNOG00000006569, ENSRNOG00000014182, ENSRNOG00000004516, ENSRNOG00000058111, ENSRNOG00000004912, ENSRNOG00000034258, ENSRNOG00000059801, ENSRNOG00000002959, ENSRNOG00000050994, ENSRNOG00000010780, ENSRNOG00000018991, ENSRNOG00000014297, ENSRNOG00000010260, ENSRNOG00000015658, ENSRNOG00000002171, ENSRNOG00000001195
CC	GO:0014069	postsynaptic density	29	4.62231e-05	0.00141443	ENSRNOG00000033835, ENSRNOG00000004697, ENSRNOG00000011826, ENSRNOG00000008479, ENSRNOG00000001963, ENSRNOG00000032922, ENSRNOG00000001525, ENSRNOG00000010233, ENSRNOG00000001528, ENSRNOG00000001627, ENSRNOG00000014686, ENSRNOG00000026705, ENSRNOG00000008332, ENSRNOG00000043085, ENSRNOG00000008428, ENSRNOG00000028832, ENSRNOG00000012207, ENSRNOG00000019181, ENSRNOG00000005519, ENSRNOG00000013213,…
MF	GO:0042802	identical protein binding	98	4.62749e-05	0.0048068	ENSRNOG00000033835, ENSRNOG00000007545, ENSRNOG00000007302, ENSRNOG00000056836, ENSRNOG00000004314, ENSRNOG00000003745, ENSRNOG00000055340, ENSRNOG00000011400, ENSRNOG00000014087, ENSRNOG00000013141, ENSRNOG00000019937, ENSRNOG00000017637, ENSRNOG00000024207, ENSRNOG00000008079, ENSRNOG00000030715, ENSRNOG00000009715, ENSRNOG00000028896, ENSRNOG00000002643, ENSRNOG00000002126, ENSRNOG00000008622,…
BP	GO:0031214	biomineral tissue development	7	5.40143e-05	0.00893294	ENSRNOG00000002154, ENSRNOG00000002167, ENSRNOG00000013994, ENSRNOG00000002158, ENSRNOG00000001314, ENSRNOG00000021166, ENSRNOG00000043451
BP	GO:0001755	neural crest cell migration	10	5.87537e-05	0.00927508	ENSRNOG00000008292, ENSRNOG00000014751, ENSRNOG00000006631, ENSRNOG00000010997, ENSRNOG00000011977, ENSRNOG00000023337, ENSRNOG00000006526, ENSRNOG00000008332, ENSRNOG00000007202, ENSRNOG00000005033
BP	GO:0007411	axon guidance	19	6.60664e-05	0.00997602	ENSRNOG00000004642, ENSRNOG00000002024, ENSRNOG00000006631, ENSRNOG00000030515, ENSRNOG00000011977, ENSRNOG00000004438, ENSRNOG00000005964, ENSRNOG00000006526, ENSRNOG00000012148, ENSRNOG00000005715, ENSRNOG00000053384, ENSRNOG00000013213, ENSRNOG00000001528, ENSRNOG00000033099, ENSRNOG00000029071, ENSRNOG00000005093, ENSRNOG00000023337, ENSRNOG00000002041, ENSRNOG00000007202
MF	GO:0004222	metalloendopeptidase activity	15	6.7569e-05	0.00623887	ENSRNOG00000049385, ENSRNOG00000033527, ENSRNOG00000033528, ENSRNOG00000009514, ENSRNOG00000012655, ENSRNOG00000019577, ENSRNOG00000005708, ENSRNOG00000016812, ENSRNOG00000029141, ENSRNOG00000008478, ENSRNOG00000023257, ENSRNOG00000005574, ENSRNOG00000023440, ENSRNOG00000028344, ENSRNOG00000042860
CC	GO:0045121	membrane raft	26	7.8624e-05	0.00225553	ENSRNOG00000006997, ENSRNOG00000004697, ENSRNOG00000004332, ENSRNOG00000008116, ENSRNOG00000010997, ENSRNOG00000004438, ENSRNOG00000056836, ENSRNOG00000028708, ENSRNOG00000033099, ENSRNOG00000013141, ENSRNOG00000038483, ENSRNOG00000014961, ENSRNOG00000015658, ENSRNOG00000007284, ENSRNOG00000000164, ENSRNOG00000009514, ENSRNOG00000005854, ENSRNOG00000003999, ENSRNOG00000053450, ENSRNOG00000010780,…
MF	GO:0005515	protein binding	90	8.49526e-05	0.00663913	ENSRNOG00000033835, ENSRNOG00000056558, ENSRNOG00000009848, ENSRNOG00000008479, ENSRNOG00000004438, ENSRNOG00000056836, ENSRNOG00000005964, ENSRNOG00000009329, ENSRNOG00000031890, ENSRNOG00000001525, ENSRNOG00000017392, ENSRNOG00000016182, ENSRNOG00000004912, ENSRNOG00000016460, ENSRNOG00000001528, ENSRNOG00000017673, ENSRNOG00000022946, ENSRNOG00000014288, ENSRNOG00000014686, ENSRNOG00000017438,…
BP	GO:0050919	negative chemotaxis	9	8.87638e-05	0.0123789	ENSRNOG00000006631, ENSRNOG00000011977, ENSRNOG00000001312, ENSRNOG00000005093, ENSRNOG00000023337, ENSRNOG00000006526, ENSRNOG00000005715, ENSRNOG00000004912, ENSRNOG00000007202
BP	GO:0009617	response to bacterium	21	8.91081e-05	0.0123789	ENSRNOG00000007159, ENSRNOG00000049282, ENSRNOG00000056836, ENSRNOG00000001963, ENSRNOG00000008943, ENSRNOG00000019050, ENSRNOG00000051235, ENSRNOG00000022839, ENSRNOG00000018247, ENSRNOG00000013552, ENSRNOG00000057092, ENSRNOG00000023969, ENSRNOG00000037198, ENSRNOG00000022218, ENSRNOG00000023943, ENSRNOG00000022256, ENSRNOG00000009795, ENSRNOG00000029330, ENSRNOG00000023257, ENSRNOG00000002052
MF	GO:0050840	extracellular matrix binding	8	9.43427e-05	0.00663913	ENSRNOG00000004554, ENSRNOG00000014166, ENSRNOG00000002167, ENSRNOG00000005998, ENSRNOG00000043451, ENSRNOG00000012840, ENSRNOG00000004912, ENSRNOG00000019598
MF	GO:0019838	growth factor binding	9	0.000101728	0.00663913	ENSRNOG00000033192, ENSRNOG00000028896, ENSRNOG00000012094, ENSRNOG00000015654, ENSRNOG00000002024, ENSRNOG00000020716, ENSRNOG00000019598, ENSRNOG00000007036, ENSRNOG00000005033
MF	GO:0042803	protein homodimerization activity	46	0.000103861	0.00663913	ENSRNOG00000006997, ENSRNOG00000003365, ENSRNOG00000027276, ENSRNOG00000002176, ENSRNOG00000004057, ENSRNOG00000005964, ENSRNOG00000003745, ENSRNOG00000011441, ENSRNOG00000050794, ENSRNOG00000056457, ENSRNOG00000015354, ENSRNOG00000015654, ENSRNOG00000013994, ENSRNOG00000054508, ENSRNOG00000028261, ENSRNOG00000056701, ENSRNOG00000002265, ENSRNOG00000002146, ENSRNOG00000026053, ENSRNOG00000009514,…
BP	GO:0001822	kidney development	19	0.000106736	0.0141761	ENSRNOG00000004554, ENSRNOG00000002146, ENSRNOG00000007302, ENSRNOG00000009514, ENSRNOG00000010588, ENSRNOG00000004766, ENSRNOG00000012655, ENSRNOG00000000614, ENSRNOG00000053384, ENSRNOG00000019598, ENSRNOG00000058742, ENSRNOG00000018445, ENSRNOG00000023309, ENSRNOG00000017438, ENSRNOG00000013994, ENSRNOG00000046905, ENSRNOG00000030715, ENSRNOG00000006052, ENSRNOG00000007036
BP	GO:0007420	brain development	29	0.000110209	0.0141761	ENSRNOG00000004730, ENSRNOG00000030149, ENSRNOG00000004438, ENSRNOG00000004810, ENSRNOG00000032922, ENSRNOG00000031890, ENSRNOG00000001227, ENSRNOG00000053086, ENSRNOG00000002959, ENSRNOG00000050994, ENSRNOG00000019556, ENSRNOG00000029071, ENSRNOG00000013656, ENSRNOG00000008079, ENSRNOG00000043143, ENSRNOG00000002051, ENSRNOG00000004642, ENSRNOG00000009419, ENSRNOG00000012749, ENSRNOG00000005697,…
BP	GO:0043627	response to estrogen	14	0.000138416	0.0169487	ENSRNOG00000008336, ENSRNOG00000009514, ENSRNOG00000056836, ENSRNOG00000005854, ENSRNOG00000004303, ENSRNOG00000020918, ENSRNOG00000001414, ENSRNOG00000011150, ENSRNOG00000008292, ENSRNOG00000009173, ENSRNOG00000014117, ENSRNOG00000008478, ENSRNOG00000007036, ENSRNOG00000046643
CC	GO:0048471	perinuclear region of cytoplasm	47	0.000140346	0.00378935	ENSRNOG00000006997, ENSRNOG00000004332, ENSRNOG00000049282, ENSRNOG00000011107, ENSRNOG00000056836, ENSRNOG00000016182, ENSRNOG00000016460, ENSRNOG00000058111, ENSRNOG00000011441, ENSRNOG00000050794, ENSRNOG00000013791, ENSRNOG00000026705, ENSRNOG00000048315, ENSRNOG00000043143, ENSRNOG00000028261, ENSRNOG00000002051, ENSRNOG00000007089, ENSRNOG00000006645, ENSRNOG00000000164, ENSRNOG00000028930,…
BP	GO:0045599	negative regulation of fat cell differentiation	10	0.000141762	0.0169487	ENSRNOG00000027145, ENSRNOG00000049232, ENSRNOG00000005933, ENSRNOG00000013994, ENSRNOG00000007319, ENSRNOG00000016617, ENSRNOG00000012148, ENSRNOG00000019584, ENSRNOG00000019598, ENSRNOG00000028344
BP	GO:0001666	response to hypoxia	24	0.000148917	0.0169487	ENSRNOG00000008428, ENSRNOG00000009848, ENSRNOG00000007545, ENSRNOG00000031203, ENSRNOG00000007159, ENSRNOG00000008479, ENSRNOG00000004900, ENSRNOG00000001312, ENSRNOG00000056836, ENSRNOG00000005854, ENSRNOG00000008943, ENSRNOG00000013017, ENSRNOG00000058111, ENSRNOG00000003869, ENSRNOG00000019598, ENSRNOG00000033280, ENSRNOG00000008292, ENSRNOG00000014117, ENSRNOG00000016758, ENSRNOG00000005195,…
BP	GO:0009612	response to mechanical stimulus	14	0.000151284	0.0169487	ENSRNOG00000004730, ENSRNOG00000004554, ENSRNOG00000007159, ENSRNOG00000056836, ENSRNOG00000046261, ENSRNOG00000004303, ENSRNOG00000002930, ENSRNOG00000008292, ENSRNOG00000013994, ENSRNOG00000017428, ENSRNOG00000018659, ENSRNOG00000048315, ENSRNOG00000008478, ENSRNOG00000005695
CC	GO:0030425	dendrite	39	0.000166136	0.00423647	ENSRNOG00000005248, ENSRNOG00000002176, ENSRNOG00000008479, ENSRNOG00000011107, ENSRNOG00000009329, ENSRNOG00000011203, ENSRNOG00000028708, ENSRNOG00000010233, ENSRNOG00000000879, ENSRNOG00000001528, ENSRNOG00000014686, ENSRNOG00000029071, ENSRNOG00000019937, ENSRNOG00000055382, ENSRNOG00000023337, ENSRNOG00000008332, ENSRNOG00000043085, ENSRNOG00000008697, ENSRNOG00000004077, ENSRNOG00000026573,…
BP	GO:0051897	positive regulation of protein kinase B signaling	15	0.000169437	0.0183892	ENSRNOG00000009848, ENSRNOG00000004332, ENSRNOG00000049232, ENSRNOG00000003259, ENSRNOG00000011977, ENSRNOG00000001312, ENSRNOG00000005854, ENSRNOG00000017392, ENSRNOG00000016050, ENSRNOG00000019598, ENSRNOG00000020716, ENSRNOG00000018646, ENSRNOG00000014751, ENSRNOG00000020369, ENSRNOG00000007036
BP	GO:0043542	endothelial cell migration	8	0.000183774	0.018772	ENSRNOG00000026053, ENSRNOG00000016758, ENSRNOG00000009390, ENSRNOG00000005679, ENSRNOG00000002746, ENSRNOG00000017392, ENSRNOG00000019598, ENSRNOG00000007036
BP	GO:0033627	cell adhesion mediated by integrin	8	0.000183774	0.018772	ENSRNOG00000007302, ENSRNOG00000006569, ENSRNOG00000046639, ENSRNOG00000004516, ENSRNOG00000008697, ENSRNOG00000058111, ENSRNOG00000004912, ENSRNOG00000043167
BP	GO:0035457	cellular response to interferon-alpha	6	0.00020045	0.0198904	ENSRNOG00000014574, ENSRNOG00000036604, ENSRNOG00000019050, ENSRNOG00000001369, ENSRNOG00000020716, ENSRNOG00000022839
MF	GO:0008083	growth factor activity	16	0.000206165	0.0122374	ENSRNOG00000033209, ENSRNOG00000003553, ENSRNOG00000001312, ENSRNOG00000017392, ENSRNOG00000016182, ENSRNOG00000053384, ENSRNOG00000019598, ENSRNOG00000012471, ENSRNOG00000018646, ENSRNOG00000020369, ENSRNOG00000018659, ENSRNOG00000008697, ENSRNOG00000029792, ENSRNOG00000002381, ENSRNOG00000001162, ENSRNOG00000048389
BP	GO:0030154	cell differentiation	34	0.000206431	0.0199149	ENSRNOG00000004332, ENSRNOG00000007765, ENSRNOG00000056836, ENSRNOG00000008658, ENSRNOG00000009329, ENSRNOG00000000875, ENSRNOG00000017392, ENSRNOG00000012499, ENSRNOG00000019598, ENSRNOG00000020716, ENSRNOG00000013340, ENSRNOG00000046912, ENSRNOG00000008292, ENSRNOG00000014940, ENSRNOG00000004330, ENSRNOG00000047002, ENSRNOG00000004225, ENSRNOG00000033528, ENSRNOG00000006565, ENSRNOG00000011977,…
CC	GO:0015629	actin cytoskeleton	21	0.000209968	0.0050724	ENSRNOG00000026573, ENSRNOG00000003067, ENSRNOG00000004498, ENSRNOG00000012207, ENSRNOG00000019181, ENSRNOG00000015071, ENSRNOG00000010233, ENSRNOG00000059801, ENSRNOG00000002959, ENSRNOG00000020716, ENSRNOG00000018991, ENSRNOG00000050794, ENSRNOG00000034013, ENSRNOG00000017500, ENSRNOG00000018797, ENSRNOG00000014256, ENSRNOG00000054080, ENSRNOG00000006384, ENSRNOG00000016419, ENSRNOG00000006003
BP	GO:0010628	positive regulation of gene expression	39	0.000233118	0.0218816	ENSRNOG00000006997, ENSRNOG00000009848, ENSRNOG00000004438, ENSRNOG00000056836, ENSRNOG00000003745, ENSRNOG00000008658, ENSRNOG00000056550, ENSRNOG00000017392, ENSRNOG00000016460, ENSRNOG00000012499, ENSRNOG00000028708, ENSRNOG00000053384, ENSRNOG00000019598, ENSRNOG00000014481, ENSRNOG00000040013, ENSRNOG00000008292, ENSRNOG00000014288, ENSRNOG00000018445, ENSRNOG00000008332, ENSRNOG00000002265,…
CC	GO:0043197	dendritic spine	19	0.000280104	0.00642838	ENSRNOG00000026573, ENSRNOG00000006997, ENSRNOG00000008428, ENSRNOG00000011826, ENSRNOG00000008479, ENSRNOG00000009329, ENSRNOG00000005519, ENSRNOG00000011203, ENSRNOG00000028708, ENSRNOG00000010233, ENSRNOG00000013213, ENSRNOG00000050994, ENSRNOG00000001627, ENSRNOG00000050794, ENSRNOG00000014686, ENSRNOG00000026705, ENSRNOG00000013656, ENSRNOG00000017428, ENSRNOG00000047014
BP	GO:0071560	cellular response to transforming growth factor beta stimulus	13	0.000316119	0.0288916	ENSRNOG00000028930, ENSRNOG00000007302, ENSRNOG00000029911, ENSRNOG00000001312, ENSRNOG00000056836, ENSRNOG00000008943, ENSRNOG00000001414, ENSRNOG00000014288, ENSRNOG00000013994, ENSRNOG00000027869, ENSRNOG00000021155, ENSRNOG00000004540, ENSRNOG00000007036
MF	GO:0005102	receptor binding	28	0.000343527	0.0181688	ENSRNOG00000006997, ENSRNOG00000004332, ENSRNOG00000007545, ENSRNOG00000004476, ENSRNOG00000056836, ENSRNOG00000011568, ENSRNOG00000004912, ENSRNOG00000016460, ENSRNOG00000019598, ENSRNOG00000014288, ENSRNOG00000014961, ENSRNOG00000022988, ENSRNOG00000008428, ENSRNOG00000028896, ENSRNOG00000002146, ENSRNOG00000005854, ENSRNOG00000002667, ENSRNOG00000006569, ENSRNOG00000016050, ENSRNOG00000001414,…
BP	GO:0009611	response to wounding	13	0.000344434	0.0306723	ENSRNOG00000028896, ENSRNOG00000012826, ENSRNOG00000007159, ENSRNOG00000001312, ENSRNOG00000012207, ENSRNOG00000016460, ENSRNOG00000015461, ENSRNOG00000014288, ENSRNOG00000013994, ENSRNOG00000017428, ENSRNOG00000008332, ENSRNOG00000006052, ENSRNOG00000029212
MF	GO:0005044	scavenger receptor activity	9	0.00034982	0.0181688	ENSRNOG00000002385, ENSRNOG00000016366, ENSRNOG00000018434, ENSRNOG00000019622, ENSRNOG00000013994, ENSRNOG00000012779, ENSRNOG00000016758, ENSRNOG00000004089, ENSRNOG00000010253
BP	GO:2001028	positive regulation of endothelial cell chemotaxis	5	0.00036617	0.0317927	ENSRNOG00000014166, ENSRNOG00000011977, ENSRNOG00000017392, ENSRNOG00000004165, ENSRNOG00000007089
BP	GO:0048812	neuron projection morphogenesis	11	0.000382519	0.0324022	ENSRNOG00000012471, ENSRNOG00000004332, ENSRNOG00000007518, ENSRNOG00000032922, ENSRNOG00000012148, ENSRNOG00000016460, ENSRNOG00000053384, ENSRNOG00000018350, ENSRNOG00000050994, ENSRNOG00000000879, ENSRNOG00000017673
BP	GO:0008283	cell proliferation	26	0.000417553	0.0342421	ENSRNOG00000009848, ENSRNOG00000004332, ENSRNOG00000007445, ENSRNOG00000056836, ENSRNOG00000020918, ENSRNOG00000017392, ENSRNOG00000012499, ENSRNOG00000058111, ENSRNOG00000053384, ENSRNOG00000019598, ENSRNOG00000019556, ENSRNOG00000018445, ENSRNOG00000014961, ENSRNOG00000013994, ENSRNOG00000008332, ENSRNOG00000002093, ENSRNOG00000001162, ENSRNOG00000008428, ENSRNOG00000005933, ENSRNOG00000001312,…
BP	GO:0008285	negative regulation of cell proliferation	31	0.000426387	0.0342421	ENSRNOG00000006997, ENSRNOG00000007765, ENSRNOG00000020060, ENSRNOG00000007445, ENSRNOG00000004498, ENSRNOG00000056836, ENSRNOG00000001227, ENSRNOG00000055340, ENSRNOG00000017392, ENSRNOG00000012499, ENSRNOG00000053384, ENSRNOG00000003407, ENSRNOG00000011044, ENSRNOG00000022839, ENSRNOG00000001627, ENSRNOG00000019556, ENSRNOG00000018445, ENSRNOG00000014961, ENSRNOG00000014940, ENSRNOG00000024207,…
BP	GO:0098609	cell-cell adhesion	17	0.000433819	0.0342421	ENSRNOG00000002176, ENSRNOG00000004332, ENSRNOG00000008116, ENSRNOG00000030515, ENSRNOG00000004438, ENSRNOG00000011789, ENSRNOG00000031669, ENSRNOG00000042848, ENSRNOG00000003715, ENSRNOG00000019598, ENSRNOG00000033099, ENSRNOG00000014961, ENSRNOG00000046639, ENSRNOG00000030418, ENSRNOG00000006003, ENSRNOG00000002041, ENSRNOG00000043167
CC	GO:0005794	Golgi apparatus	60	0.000459913	0.0100524	ENSRNOG00000033835, ENSRNOG00000008116, ENSRNOG00000056836, ENSRNOG00000012019, ENSRNOG00000010994, ENSRNOG00000016460, ENSRNOG00000003869, ENSRNOG00000014087, ENSRNOG00000013991, ENSRNOG00000038483, ENSRNOG00000017438, ENSRNOG00000024207, ENSRNOG00000026504, ENSRNOG00000008478, ENSRNOG00000004589, ENSRNOG00000003613, ENSRNOG00000001314, ENSRNOG00000002407, ENSRNOG00000013213, ENSRNOG00000018454,…
BP	GO:0050679	positive regulation of epithelial cell proliferation	12	0.000466462	0.0360005	ENSRNOG00000049232, ENSRNOG00000004332, ENSRNOG00000005933, ENSRNOG00000005964, ENSRNOG00000054508, ENSRNOG00000008332, ENSRNOG00000009730, ENSRNOG00000017392, ENSRNOG00000016182, ENSRNOG00000052469, ENSRNOG00000019598, ENSRNOG00000058742
BP	GO:0051384	response to glucocorticoid	14	0.000508704	0.0381114	ENSRNOG00000033527, ENSRNOG00000028896, ENSRNOG00000012749, ENSRNOG00000007159, ENSRNOG00000011107, ENSRNOG00000056836, ENSRNOG00000020918, ENSRNOG00000012840, ENSRNOG00000033280, ENSRNOG00000008292, ENSRNOG00000014288, ENSRNOG00000015654, ENSRNOG00000017105, ENSRNOG00000005695
BP	GO:1901215	negative regulation of neuron death	11	0.00051576	0.0381114	ENSRNOG00000006997, ENSRNOG00000013141, ENSRNOG00000008816, ENSRNOG00000015654, ENSRNOG00000004900, ENSRNOG00000018659, ENSRNOG00000008332, ENSRNOG00000018454, ENSRNOG00000019598, ENSRNOG00000003680, ENSRNOG00000058006
BP	GO:1904383	response to sodium phosphate	5	0.000534469	0.038671	ENSRNOG00000010997, ENSRNOG00000013994, ENSRNOG00000010960, ENSRNOG00000016050, ENSRNOG00000023440
MF	GO:0015631	tubulin binding	10	0.000558351	0.0258257	ENSRNOG00000053334, ENSRNOG00000020060, ENSRNOG00000029071, ENSRNOG00000042978, ENSRNOG00000043143, ENSRNOG00000028261, ENSRNOG00000006804, ENSRNOG00000027831, ENSRNOG00000016890, ENSRNOG00000001294
MF	GO:0042169	SH2 domain binding	8	0.000559401	0.0258257	ENSRNOG00000012284, ENSRNOG00000004057, ENSRNOG00000014597, ENSRNOG00000004696, ENSRNOG00000015654, ENSRNOG00000016050, ENSRNOG00000010780, ENSRNOG00000001195
BP	GO:0006897	endocytosis	17	0.000587736	0.0416573	ENSRNOG00000006997, ENSRNOG00000033835, ENSRNOG00000061508, ENSRNOG00000002385, ENSRNOG00000028930, ENSRNOG00000011944, ENSRNOG00000006548, ENSRNOG00000010253, ENSRNOG00000018434, ENSRNOG00000015654, ENSRNOG00000013994, ENSRNOG00000020479, ENSRNOG00000016758, ENSRNOG00000030726, ENSRNOG00000004089, ENSRNOG00000060550, ENSRNOG00000021681
BP	GO:0002040	sprouting angiogenesis	7	0.000655292	0.0453665	ENSRNOG00000006631, ENSRNOG00000029658, ENSRNOG00000014863, ENSRNOG00000011568, ENSRNOG00000016758, ENSRNOG00000005854, ENSRNOG00000019598
BP	GO:2001237	negative regulation of extrinsic apoptotic signaling pathway	8	0.000666194	0.0453665	ENSRNOG00000049232, ENSRNOG00000028930, ENSRNOG00000005933, ENSRNOG00000004912, ENSRNOG00000050994, ENSRNOG00000019598, ENSRNOG00000007036, ENSRNOG00000005033
CC	GO:0001725	stress fiber	11	0.000721461	0.0148421	ENSRNOG00000049452, ENSRNOG00000012207, ENSRNOG00000019181, ENSRNOG00000031669, ENSRNOG00000015658, ENSRNOG00000016419, ENSRNOG00000034258, ENSRNOG00000059801, ENSRNOG00000010780, ENSRNOG00000002959, ENSRNOG00000050794
CC	GO:0043204	perikaryon	18	0.00074372	0.0148421	ENSRNOG00000006997, ENSRNOG00000008428, ENSRNOG00000007159, ENSRNOG00000011107, ENSRNOG00000019181, ENSRNOG00000008943, ENSRNOG00000028708, ENSRNOG00000018350, ENSRNOG00000013213, ENSRNOG00000001528, ENSRNOG00000033280, ENSRNOG00000013141, ENSRNOG00000019937, ENSRNOG00000023601, ENSRNOG00000017428, ENSRNOG00000008376, ENSRNOG00000004077, ENSRNOG00000040242
BP	GO:0070374	positive regulation of ERK1 and ERK2 cascade	20	0.000744184	0.0492282	ENSRNOG00000006997, ENSRNOG00000002265, ENSRNOG00000008428, ENSRNOG00000004332, ENSRNOG00000007159, ENSRNOG00000008816, ENSRNOG00000029768, ENSRNOG00000001312, ENSRNOG00000005854, ENSRNOG00000017392, ENSRNOG00000000239, ENSRNOG00000018454, ENSRNOG00000019598, ENSRNOG00000033099, ENSRNOG00000019622, ENSRNOG00000015357, ENSRNOG00000013838, ENSRNOG00000001195, ENSRNOG00000001162, ENSRNOG00000048389
BP	GO:0048339	paraxial mesoderm development	5	0.000751252	0.0492282	ENSRNOG00000015488, ENSRNOG00000005933, ENSRNOG00000007518, ENSRNOG00000016050, ENSRNOG00000052469
MF	GO:0030215	semaphorin receptor binding	6	0.000809655	0.0354118	ENSRNOG00000017568, ENSRNOG00000006631, ENSRNOG00000011977, ENSRNOG00000023337, ENSRNOG00000006526, ENSRNOG00000007202
BP	GO:0007568	aging	25	0.000851313	0.054752	ENSRNOG00000004554, ENSRNOG00000010997, ENSRNOG00000031890, ENSRNOG00000017392, ENSRNOG00000016460, ENSRNOG00000019598, ENSRNOG00000018445, ENSRNOG00000017438, ENSRNOG00000013994, ENSRNOG00000026605, ENSRNOG00000055382, ENSRNOG00000012807, ENSRNOG00000012749, ENSRNOG00000007159, ENSRNOG00000009514, ENSRNOG00000004303, ENSRNOG00000008943, ENSRNOG00000018454, ENSRNOG00000051433, ENSRNOG00000018991,…
BP	GO:0050731	positive regulation of peptidyl-tyrosine phosphorylation	13	0.000888882	0.0555636	ENSRNOG00000008116, ENSRNOG00000004438, ENSRNOG00000005854, ENSRNOG00000016182, ENSRNOG00000019598, ENSRNOG00000012471, ENSRNOG00000018646, ENSRNOG00000018445, ENSRNOG00000015654, ENSRNOG00000017438, ENSRNOG00000020369, ENSRNOG00000004089, ENSRNOG00000005033
BP	GO:0071260	cellular response to mechanical stimulus	14	0.000895929	0.0555636	ENSRNOG00000009848, ENSRNOG00000004332, ENSRNOG00000032973, ENSRNOG00000056836, ENSRNOG00000001414, ENSRNOG00000017392, ENSRNOG00000058111, ENSRNOG00000019598, ENSRNOG00000008292, ENSRNOG00000038483, ENSRNOG00000018445, ENSRNOG00000013994, ENSRNOG00000020369, ENSRNOG00000007284
BP	GO:0030500	regulation of bone mineralization	6	0.000919858	0.0560468	ENSRNOG00000002167, ENSRNOG00000013994, ENSRNOG00000039560, ENSRNOG00000010960, ENSRNOG00000021166, ENSRNOG00000005695
MF	GO:0048018	receptor agonist activity	9	0.00095484	0.0396736	ENSRNOG00000018646, ENSRNOG00000018445, ENSRNOG00000006631, ENSRNOG00000008816, ENSRNOG00000026053, ENSRNOG00000020369, ENSRNOG00000049349, ENSRNOG00000016182, ENSRNOG00000019598
CC	GO:0070161	anchoring junction	28	0.00100627	0.0187009	ENSRNOG00000004697, ENSRNOG00000056558, ENSRNOG00000011826, ENSRNOG00000004498, ENSRNOG00000009329, ENSRNOG00000011203, ENSRNOG00000001528, ENSRNOG00000017673, ENSRNOG00000014961, ENSRNOG00000029071, ENSRNOG00000026705, ENSRNOG00000019937, ENSRNOG00000017637, ENSRNOG00000043085, ENSRNOG00000004077, ENSRNOG00000003680, ENSRNOG00000011619, ENSRNOG00000026573, ENSRNOG00000027264, ENSRNOG00000005679,…
CC	GO:0045177	apical part of cell	14	0.00101857	0.0187009	ENSRNOG00000006997, ENSRNOG00000010903, ENSRNOG00000004900, ENSRNOG00000005679, ENSRNOG00000056550, ENSRNOG00000051854, ENSRNOG00000015880, ENSRNOG00000018525, ENSRNOG00000014652, ENSRNOG00000043451, ENSRNOG00000007894, ENSRNOG00000047014, ENSRNOG00000005033, ENSRNOG00000007089
BP	GO:0046785	microtubule polymerization	5	0.0010235	0.0592439	ENSRNOG00000056836, ENSRNOG00000028261, ENSRNOG00000027831, ENSRNOG00000016890, ENSRNOG00000001195
BP	GO:0008347	glial cell migration	5	0.0010235	0.0592439	ENSRNOG00000014288, ENSRNOG00000019556, ENSRNOG00000007159, ENSRNOG00000013213, ENSRNOG00000029212
BP	GO:0046622	positive regulation of organ growth	5	0.0010235	0.0592439	ENSRNOG00000018445, ENSRNOG00000005933, ENSRNOG00000020369, ENSRNOG00000008332, ENSRNOG00000011763
BP	GO:0050673	epithelial cell proliferation	11	0.00106866	0.0608433	ENSRNOG00000008428, ENSRNOG00000049232, ENSRNOG00000004332, ENSRNOG00000005933, ENSRNOG00000008332, ENSRNOG00000009730, ENSRNOG00000017392, ENSRNOG00000005715, ENSRNOG00000052469, ENSRNOG00000019598, ENSRNOG00000000814
BP	GO:0090026	positive regulation of monocyte chemotaxis	6	0.00112962	0.0632769	ENSRNOG00000006997, ENSRNOG00000025691, ENSRNOG00000007159, ENSRNOG00000022256, ENSRNOG00000001414, ENSRNOG00000007089
CC	GO:0030864	cortical actin cytoskeleton	9	0.00122352	0.0215998	ENSRNOG00000017500, ENSRNOG00000018797, ENSRNOG00000007284, ENSRNOG00000053450, ENSRNOG00000050994, ENSRNOG00000010780, ENSRNOG00000002959, ENSRNOG00000018991, ENSRNOG00000001195
BP	GO:0010544	negative regulation of platelet activation	4	0.00124947	0.0678035	ENSRNOG00000003259, ENSRNOG00000001312, ENSRNOG00000018454, ENSRNOG00000015461
BP	GO:0098883	synapse disassembly	4	0.00124947	0.0678035	ENSRNOG00000012749, ENSRNOG00000012804, ENSRNOG00000013213, ENSRNOG00000012807
BP	GO:0001657	ureteric bud development	8	0.00128914	0.0678364	ENSRNOG00000009173, ENSRNOG00000014751, ENSRNOG00000015357, ENSRNOG00000016050, ENSRNOG00000053384, ENSRNOG00000020030, ENSRNOG00000029212, ENSRNOG00000014297
BP	GO:0007405	neuroblast proliferation	8	0.00128914	0.0678364	ENSRNOG00000008428, ENSRNOG00000008292, ENSRNOG00000027264, ENSRNOG00000008332, ENSRNOG00000043143, ENSRNOG00000017392, ENSRNOG00000019598, ENSRNOG00000018268
MF	GO:0008430	selenium binding	4	0.00132349	0.0523724	ENSRNOG00000061237, ENSRNOG00000053086, ENSRNOG00000047158, ENSRNOG00000052564
CC	GO:0005901	caveola	11	0.00132902	0.0225933	ENSRNOG00000014597, ENSRNOG00000014686, ENSRNOG00000056836, ENSRNOG00000014117, ENSRNOG00000008332, ENSRNOG00000008376, ENSRNOG00000007284, ENSRNOG00000052469, ENSRNOG00000010780, ENSRNOG00000014481, ENSRNOG00000007036
BP	GO:0043410	positive regulation of MAPK cascade	17	0.00135768	0.0693414	ENSRNOG00000006997, ENSRNOG00000010977, ENSRNOG00000004332, ENSRNOG00000003259, ENSRNOG00000001312, ENSRNOG00000011789, ENSRNOG00000017392, ENSRNOG00000016050, ENSRNOG00000019598, ENSRNOG00000014276, ENSRNOG00000017568, ENSRNOG00000014751, ENSRNOG00000018445, ENSRNOG00000020369, ENSRNOG00000013656, ENSRNOG00000048315, ENSRNOG00000007036
BP	GO:0051649	establishment of localization in cell	17	0.00135768	0.0693414	ENSRNOG00000004731, ENSRNOG00000006841, ENSRNOG00000028930, ENSRNOG00000002146, ENSRNOG00000011944, ENSRNOG00000012779, ENSRNOG00000056836, ENSRNOG00000011016, ENSRNOG00000032884, ENSRNOG00000020716, ENSRNOG00000011374, ENSRNOG00000022946, ENSRNOG00000014686, ENSRNOG00000013994, ENSRNOG00000058275, ENSRNOG00000022239, ENSRNOG00000001162
CC	GO:0031410	cytoplasmic vesicle	26	0.00144411	0.0236731	ENSRNOG00000006997, ENSRNOG00000033835, ENSRNOG00000004057, ENSRNOG00000008816, ENSRNOG00000012779, ENSRNOG00000056836, ENSRNOG00000001963, ENSRNOG00000016182, ENSRNOG00000000879, ENSRNOG00000014961, ENSRNOG00000021695, ENSRNOG00000008850, ENSRNOG00000008428, ENSRNOG00000002146, ENSRNOG00000009514, ENSRNOG00000012207, ENSRNOG00000016291, ENSRNOG00000016050, ENSRNOG00000051854, ENSRNOG00000004747,…
BP	GO:0071526	semaphorin-plexin signaling pathway	7	0.00145498	0.0732342	ENSRNOG00000004398, ENSRNOG00000006631, ENSRNOG00000011977, ENSRNOG00000018051, ENSRNOG00000023337, ENSRNOG00000006526, ENSRNOG00000007202
BP	GO:0010862	positive regulation of pathway-restricted SMAD protein phosphorylation	8	0.00163843	0.0805405	ENSRNOG00000013340, ENSRNOG00000033209, ENSRNOG00000028930, ENSRNOG00000052469, ENSRNOG00000053384, ENSRNOG00000002381, ENSRNOG00000007036, ENSRNOG00000005033
BP	GO:0009887	animal organ morphogenesis	13	0.00166015	0.0805405	ENSRNOG00000004730, ENSRNOG00000059507, ENSRNOG00000026053, ENSRNOG00000006649, ENSRNOG00000001312, ENSRNOG00000002667, ENSRNOG00000017392, ENSRNOG00000053384, ENSRNOG00000018268, ENSRNOG00000020369, ENSRNOG00000006025, ENSRNOG00000005573, ENSRNOG00000048389
BP	GO:0006874	cellular calcium ion homeostasis	12	0.00167155	0.0805405	ENSRNOG00000006645, ENSRNOG00000002265, ENSRNOG00000002146, ENSRNOG00000007159, ENSRNOG00000008479, ENSRNOG00000029768, ENSRNOG00000056836, ENSRNOG00000009390, ENSRNOG00000043451, ENSRNOG00000018454, ENSRNOG00000058742, ENSRNOG00000001195
BP	GO:0045944	positive regulation of transcription from RNA polymerase II promoter	64	0.00169437	0.0805405	ENSRNOG00000004554, ENSRNOG00000009848, ENSRNOG00000012937, ENSRNOG00000027595, ENSRNOG00000003745, ENSRNOG00000002414, ENSRNOG00000005964, ENSRNOG00000009329, ENSRNOG00000055340, ENSRNOG00000017392, ENSRNOG00000012499, ENSRNOG00000046912, ENSRNOG00000016102, ENSRNOG00000020369, ENSRNOG00000023679, ENSRNOG00000056701, ENSRNOG00000008428, ENSRNOG00000028930, ENSRNOG00000011879, ENSRNOG00000008622,…
BP	GO:0045669	positive regulation of osteoblast differentiation	10	0.00173524	0.0805405	ENSRNOG00000005933, ENSRNOG00000025889, ENSRNOG00000001314, ENSRNOG00000016617, ENSRNOG00000017392, ENSRNOG00000052469, ENSRNOG00000053384, ENSRNOG00000019598, ENSRNOG00000004165, ENSRNOG00000005033
BP	GO:0051607	defense response to virus	16	0.00174307	0.0805405	ENSRNOG00000001187, ENSRNOG00000036604, ENSRNOG00000049282, ENSRNOG00000001963, ENSRNOG00000028814, ENSRNOG00000019050, ENSRNOG00000001369, ENSRNOG00000022839, ENSRNOG00000001959, ENSRNOG00000018247, ENSRNOG00000017414, ENSRNOG00000059097, ENSRNOG00000006384, ENSRNOG00000022256, ENSRNOG00000048315, ENSRNOG00000009263
BP	GO:0048143	astrocyte activation	5	0.00176248	0.0805405	ENSRNOG00000006997, ENSRNOG00000018445, ENSRNOG00000004332, ENSRNOG00000008332, ENSRNOG00000012807
BP	GO:0071320	cellular response to cAMP	10	0.00189152	0.0853151	ENSRNOG00000006997, ENSRNOG00000009848, ENSRNOG00000014652, ENSRNOG00000002146, ENSRNOG00000008479, ENSRNOG00000013994, ENSRNOG00000008943, ENSRNOG00000055382, ENSRNOG00000001414, ENSRNOG00000056457
CC	GO:0005581	collagen trimer	8	0.00190917	0.0302176	ENSRNOG00000016366, ENSRNOG00000012749, ENSRNOG00000001254, ENSRNOG00000012804, ENSRNOG00000003259, ENSRNOG00000006548, ENSRNOG00000014426, ENSRNOG00000012807
BP	GO:0070106	interleukin-27-mediated signaling pathway	4	0.00194857	0.0866846	ENSRNOG00000001187, ENSRNOG00000049282, ENSRNOG00000001369, ENSRNOG00000001959
BP	GO:0010039	response to iron ion	6	0.00197181	0.0866846	ENSRNOG00000008428, ENSRNOG00000008292, ENSRNOG00000014288, ENSRNOG00000020918, ENSRNOG00000009620, ENSRNOG00000012807
BP	GO:0043536	positive regulation of blood vessel endothelial cell migration	8	0.00205717	0.0893071	ENSRNOG00000008292, ENSRNOG00000020369, ENSRNOG00000005854, ENSRNOG00000017392, ENSRNOG00000016050, ENSRNOG00000019598, ENSRNOG00000004165, ENSRNOG00000048389
CC	GO:0030027	lamellipodium	16	0.00206648	0.0316171	ENSRNOG00000004057, ENSRNOG00000002146, ENSRNOG00000007518, ENSRNOG00000005679, ENSRNOG00000018350, ENSRNOG00000050994, ENSRNOG00000001627, ENSRNOG00000018991, ENSRNOG00000050794, ENSRNOG00000017500, ENSRNOG00000014276, ENSRNOG00000016576, ENSRNOG00000014961, ENSRNOG00000029071, ENSRNOG00000006003, ENSRNOG00000001195
BP	GO:0045785	positive regulation of cell adhesion	9	0.00214478	0.0919608	ENSRNOG00000028930, ENSRNOG00000007159, ENSRNOG00000002158, ENSRNOG00000005854, ENSRNOG00000056550, ENSRNOG00000058111, ENSRNOG00000004912, ENSRNOG00000013213, ENSRNOG00000019598
MF	GO:0005158	insulin receptor binding	6	0.00215	0.0812114	ENSRNOG00000006997, ENSRNOG00000004057, ENSRNOG00000014597, ENSRNOG00000013994, ENSRNOG00000020369, ENSRNOG00000015658
CC	GO:0043235	receptor complex	18	0.00225536	0.0330009	ENSRNOG00000006997, ENSRNOG00000004332, ENSRNOG00000002024, ENSRNOG00000032973, ENSRNOG00000008336, ENSRNOG00000056915, ENSRNOG00000016050, ENSRNOG00000052469, ENSRNOG00000013213, ENSRNOG00000020716, ENSRNOG00000033192, ENSRNOG00000014751, ENSRNOG00000015654, ENSRNOG00000017438, ENSRNOG00000002093, ENSRNOG00000007036, ENSRNOG00000020030, ENSRNOG00000005033
CC	GO:0016323	basolateral plasma membrane	20	0.00230072	0.0330009	ENSRNOG00000002265, ENSRNOG00000012508, ENSRNOG00000004332, ENSRNOG00000008116, ENSRNOG00000008479, ENSRNOG00000009832, ENSRNOG00000056836, ENSRNOG00000016182, ENSRNOG00000019752, ENSRNOG00000014574, ENSRNOG00000013573, ENSRNOG00000018525, ENSRNOG00000018778, ENSRNOG00000014961, ENSRNOG00000013994, ENSRNOG00000055382, ENSRNOG00000007284, ENSRNOG00000006003, ENSRNOG00000004077, ENSRNOG00000007036
BP	GO:0007229	integrin-mediated signaling pathway	11	0.00235965	0.0999399	ENSRNOG00000014288, ENSRNOG00000008116, ENSRNOG00000002158, ENSRNOG00000006569, ENSRNOG00000046639, ENSRNOG00000004516, ENSRNOG00000058111, ENSRNOG00000004912, ENSRNOG00000023257, ENSRNOG00000019577, ENSRNOG00000043167
BP	GO:0010468	regulation of gene expression	27	0.00249407	0.103457	ENSRNOG00000006997, ENSRNOG00000020060, ENSRNOG00000052572, ENSRNOG00000008479, ENSRNOG00000008658, ENSRNOG00000012499, ENSRNOG00000013573, ENSRNOG00000008292, ENSRNOG00000014288, ENSRNOG00000018445, ENSRNOG00000017414, ENSRNOG00000014426, ENSRNOG00000008332, ENSRNOG00000008697, ENSRNOG00000004642, ENSRNOG00000005933, ENSRNOG00000016050, ENSRNOG00000019584, ENSRNOG00000010188, ENSRNOG00000018454,…
BP	GO:0043524	negative regulation of neuron apoptotic process	16	0.00250226	0.103457	ENSRNOG00000029535, ENSRNOG00000007159, ENSRNOG00000006631, ENSRNOG00000005964, ENSRNOG00000005854, ENSRNOG00000020918, ENSRNOG00000018454, ENSRNOG00000019598, ENSRNOG00000020716, ENSRNOG00000008292, ENSRNOG00000018445, ENSRNOG00000014117, ENSRNOG00000008332, ENSRNOG00000003680, ENSRNOG00000020030, ENSRNOG00000007089
BP	GO:0045668	negative regulation of osteoblast differentiation	9	0.00258129	0.104341	ENSRNOG00000013340, ENSRNOG00000050792, ENSRNOG00000009173, ENSRNOG00000026053, ENSRNOG00000017987, ENSRNOG00000055340, ENSRNOG00000016050, ENSRNOG00000004208, ENSRNOG00000024089
BP	GO:0007417	central nervous system development	13	0.00258375	0.104341	ENSRNOG00000006997, ENSRNOG00000004642, ENSRNOG00000004498, ENSRNOG00000004303, ENSRNOG00000004766, ENSRNOG00000012148, ENSRNOG00000013017, ENSRNOG00000018991, ENSRNOG00000033280, ENSRNOG00000011150, ENSRNOG00000008332, ENSRNOG00000007284, ENSRNOG00000029212
BP	GO:0030502	negative regulation of bone mineralization	5	0.0028069	0.11205	ENSRNOG00000002154, ENSRNOG00000008292, ENSRNOG00000026053, ENSRNOG00000013994, ENSRNOG00000021166
CC	GO:0043198	dendritic shaft	9	0.00294135	0.0409115	ENSRNOG00000006997, ENSRNOG00000011826, ENSRNOG00000008479, ENSRNOG00000055382, ENSRNOG00000013656, ENSRNOG00000028708, ENSRNOG00000013213, ENSRNOG00000001627, ENSRNOG00000047014
BP	GO:0045766	positive regulation of angiogenesis	15	0.0030692	0.121129	ENSRNOG00000026053, ENSRNOG00000011977, ENSRNOG00000006569, ENSRNOG00000001414, ENSRNOG00000017392, ENSRNOG00000019598, ENSRNOG00000014166, ENSRNOG00000008292, ENSRNOG00000014117, ENSRNOG00000020369, ENSRNOG00000014613, ENSRNOG00000021166, ENSRNOG00000024115, ENSRNOG00000004165, ENSRNOG00000048389
CC	GO:0030018	Z disc	13	0.00307506	0.0415133	ENSRNOG00000006645, ENSRNOG00000008170, ENSRNOG00000049452, ENSRNOG00000008479, ENSRNOG00000012207, ENSRNOG00000019181, ENSRNOG00000017637, ENSRNOG00000016419, ENSRNOG00000007284, ENSRNOG00000034258, ENSRNOG00000047014, ENSRNOG00000050794
BP	GO:0060045	positive regulation of cardiac muscle cell proliferation	6	0.00319957	0.123886	ENSRNOG00000005933, ENSRNOG00000031890, ENSRNOG00000017392, ENSRNOG00000016050, ENSRNOG00000052469, ENSRNOG00000002093
CC	GO:0005886	plasma membrane	186	0.00321028	0.0421005	ENSRNOG00000033835, ENSRNOG00000027276, ENSRNOG00000003067, ENSRNOG00000005248, ENSRNOG00000006697, ENSRNOG00000008116, ENSRNOG00000008479, ENSRNOG00000004438, ENSRNOG00000056836, ENSRNOG00000001963, ENSRNOG00000002930, ENSRNOG00000031890, ENSRNOG00000000875, ENSRNOG00000056550, ENSRNOG00000000879, ENSRNOG00000018683, ENSRNOG00000022946, ENSRNOG00000013141, ENSRNOG00000017637, ENSRNOG00000024207,…
BP	GO:0010035	response to inorganic substance	7	0.00321042	0.123886	ENSRNOG00000013994, ENSRNOG00000008336, ENSRNOG00000001312, ENSRNOG00000011107, ENSRNOG00000017428, ENSRNOG00000031890, ENSRNOG00000005195
BP	GO:0032355	response to estradiol	17	0.00327128	0.124848	ENSRNOG00000004332, ENSRNOG00000001312, ENSRNOG00000008943, ENSRNOG00000020918, ENSRNOG00000013017, ENSRNOG00000053384, ENSRNOG00000019598, ENSRNOG00000033280, ENSRNOG00000013141, ENSRNOG00000008292, ENSRNOG00000018445, ENSRNOG00000015654, ENSRNOG00000020369, ENSRNOG00000017428, ENSRNOG00000005195, ENSRNOG00000009263, ENSRNOG00000046643
BP	GO:0060070	canonical Wnt signaling pathway	11	0.00336367	0.126509	ENSRNOG00000010260, ENSRNOG00000049232, ENSRNOG00000007765, ENSRNOG00000010997, ENSRNOG00000005933, ENSRNOG00000014863, ENSRNOG00000014940, ENSRNOG00000008116, ENSRNOG00000011568, ENSRNOG00000017392, ENSRNOG00000056343
BP	GO:1900221	regulation of beta-amyloid clearance	3	0.00340985	0.126509	ENSRNOG00000006997, ENSRNOG00000016460, ENSRNOG00000018454
BP	GO:0042493	response to drug	31	0.00342712	0.126509	ENSRNOG00000008479, ENSRNOG00000008336, ENSRNOG00000011107, ENSRNOG00000056836, ENSRNOG00000031890, ENSRNOG00000020918, ENSRNOG00000016182, ENSRNOG00000058111, ENSRNOG00000013141, ENSRNOG00000008292, ENSRNOG00000014288, ENSRNOG00000020369, ENSRNOG00000014426, ENSRNOG00000008478, ENSRNOG00000008428, ENSRNOG00000007159, ENSRNOG00000005697, ENSRNOG00000001312, ENSRNOG00000016552, ENSRNOG00000058006,…
BP	GO:0035329	hippo signaling	5	0.0034605	0.126509	ENSRNOG00000015488, ENSRNOG00000005933, ENSRNOG00000016617, ENSRNOG00000008487, ENSRNOG00000056343
MF	GO:0004551	nucleotide diphosphatase activity	3	0.0035468	0.128147	ENSRNOG00000013994, ENSRNOG00000004089, ENSRNOG00000013791
BP	GO:0009755	hormone-mediated signaling pathway	7	0.00361214	0.130677	ENSRNOG00000046912, ENSRNOG00000015654, ENSRNOG00000006649, ENSRNOG00000004900, ENSRNOG00000009329, ENSRNOG00000056343, ENSRNOG00000012499
BP	GO:0007179	transforming growth factor beta receptor signaling pathway	10	0.00386319	0.138318	ENSRNOG00000013340, ENSRNOG00000009173, ENSRNOG00000007159, ENSRNOG00000012094, ENSRNOG00000027183, ENSRNOG00000006569, ENSRNOG00000020871, ENSRNOG00000002093, ENSRNOG00000007036, ENSRNOG00000005033
BP	GO:0006508	proteolysis	27	0.00398803	0.141331	ENSRNOG00000011107, ENSRNOG00000012655, ENSRNOG00000013203, ENSRNOG00000019577, ENSRNOG00000005708, ENSRNOG00000021155, ENSRNOG00000030715, ENSRNOG00000021157, ENSRNOG00000008478, ENSRNOG00000023257, ENSRNOG00000028344, ENSRNOG00000007089, ENSRNOG00000033527, ENSRNOG00000009514, ENSRNOG00000005679, ENSRNOG00000051854, ENSRNOG00000051235, ENSRNOG00000015880, ENSRNOG00000017307, ENSRNOG00000017505,…
BP	GO:0051592	response to calcium ion	10	0.00415597	0.145795	ENSRNOG00000002265, ENSRNOG00000004332, ENSRNOG00000011107, ENSRNOG00000056836, ENSRNOG00000008943, ENSRNOG00000055382, ENSRNOG00000020918, ENSRNOG00000012840, ENSRNOG00000005695, ENSRNOG00000047014
BP	GO:0007171	activation of transmembrane receptor protein tyrosine kinase activity	5	0.00421029	0.146224	ENSRNOG00000018646, ENSRNOG00000004332, ENSRNOG00000026053, ENSRNOG00000005854, ENSRNOG00000016182
BP	GO:0001568	blood vessel development	9	0.00431651	0.148428	ENSRNOG00000008292, ENSRNOG00000018445, ENSRNOG00000049232, ENSRNOG00000015357, ENSRNOG00000008116, ENSRNOG00000014426, ENSRNOG00000004912, ENSRNOG00000002093, ENSRNOG00000019598
CC	GO:0030426	growth cone	15	0.00438962	0.0559677	ENSRNOG00000006997, ENSRNOG00000053334, ENSRNOG00000032922, ENSRNOG00000031890, ENSRNOG00000016460, ENSRNOG00000018350, ENSRNOG00000050994, ENSRNOG00000001528, ENSRNOG00000013141, ENSRNOG00000029071, ENSRNOG00000023601, ENSRNOG00000017428, ENSRNOG00000002041, ENSRNOG00000001195, ENSRNOG00000011619
BP	GO:0007623	circadian rhythm	12	0.00443259	0.150926	ENSRNOG00000027145, ENSRNOG00000004332, ENSRNOG00000020060, ENSRNOG00000018413, ENSRNOG00000017105, ENSRNOG00000021027, ENSRNOG00000009329, ENSRNOG00000009730, ENSRNOG00000005715, ENSRNOG00000007152, ENSRNOG00000048961, ENSRNOG00000047014
BP	GO:0045071	negative regulation of viral genome replication	7	0.0045259	0.152606	ENSRNOG00000001187, ENSRNOG00000049282, ENSRNOG00000001963, ENSRNOG00000028814, ENSRNOG00000001369, ENSRNOG00000048315, ENSRNOG00000001959
CC	GO:0009897	external side of plasma membrane	29	0.0046709	0.0579444	ENSRNOG00000012779, ENSRNOG00000031890, ENSRNOG00000004912, ENSRNOG00000058111, ENSRNOG00000010253, ENSRNOG00000013791, ENSRNOG00000033192, ENSRNOG00000019556, ENSRNOG00000015654, ENSRNOG00000014961, ENSRNOG00000017438, ENSRNOG00000022988, ENSRNOG00000046639, ENSRNOG00000021155, ENSRNOG00000030715, ENSRNOG00000002093, ENSRNOG00000043167, ENSRNOG00000002024, ENSRNOG00000032973, ENSRNOG00000019584,…
BP	GO:0009791	post-embryonic development	11	0.00468086	0.156314	ENSRNOG00000028368, ENSRNOG00000049232, ENSRNOG00000020060, ENSRNOG00000008479, ENSRNOG00000006526, ENSRNOG00000025889, ENSRNOG00000054508, ENSRNOG00000011763, ENSRNOG00000019584, ENSRNOG00000053086, ENSRNOG00000007036
BP	GO:0030574	collagen catabolic process	6	0.00489952	0.162058	ENSRNOG00000006548, ENSRNOG00000021155, ENSRNOG00000008478, ENSRNOG00000021157, ENSRNOG00000005708, ENSRNOG00000028344
BP	GO:0009410	response to xenobiotic stimulus	31	0.00501462	0.1643	ENSRNOG00000008479, ENSRNOG00000008336, ENSRNOG00000011107, ENSRNOG00000056836, ENSRNOG00000031890, ENSRNOG00000020918, ENSRNOG00000016182, ENSRNOG00000058111, ENSRNOG00000013141, ENSRNOG00000008292, ENSRNOG00000014288, ENSRNOG00000020369, ENSRNOG00000014426, ENSRNOG00000008478, ENSRNOG00000008428, ENSRNOG00000007159, ENSRNOG00000005697, ENSRNOG00000001312, ENSRNOG00000016552, ENSRNOG00000058006,…
MF	GO:0005125	cytokine activity	14	0.00515953	0.178649	ENSRNOG00000033209, ENSRNOG00000009848, ENSRNOG00000007159, ENSRNOG00000026053, ENSRNOG00000008336, ENSRNOG00000017392, ENSRNOG00000053384, ENSRNOG00000019598, ENSRNOG00000018659, ENSRNOG00000022256, ENSRNOG00000043451, ENSRNOG00000049349, ENSRNOG00000002381, ENSRNOG00000020030
BP	GO:0007409	axonogenesis	11	0.00530917	0.167899	ENSRNOG00000006997, ENSRNOG00000008428, ENSRNOG00000016872, ENSRNOG00000012207, ENSRNOG00000017428, ENSRNOG00000032922, ENSRNOG00000005063, ENSRNOG00000018350, ENSRNOG00000006003, ENSRNOG00000017673, ENSRNOG00000008298
BP	GO:0007435	salivary gland morphogenesis	4	0.00531786	0.167899	ENSRNOG00000013340, ENSRNOG00000004332, ENSRNOG00000016050, ENSRNOG00000053384
BP	GO:0060700	regulation of ribonuclease activity	4	0.00531786	0.167899	ENSRNOG00000001187, ENSRNOG00000049282, ENSRNOG00000028814, ENSRNOG00000001369
BP	GO:0098884	postsynaptic neurotransmitter receptor internalization	4	0.00531786	0.167899	ENSRNOG00000033835, ENSRNOG00000001963, ENSRNOG00000002051, ENSRNOG00000001959
MF	GO:0036122	BMP binding	5	0.00543002	0.180494	ENSRNOG00000026053, ENSRNOG00000017987, ENSRNOG00000052469, ENSRNOG00000018394, ENSRNOG00000004330
BP	GO:0001938	positive regulation of endothelial cell proliferation	9	0.00546574	0.171014	ENSRNOG00000012471, ENSRNOG00000007159, ENSRNOG00000011977, ENSRNOG00000056836, ENSRNOG00000021166, ENSRNOG00000017392, ENSRNOG00000019598, ENSRNOG00000004165, ENSRNOG00000007036
BP	GO:0035264	multicellular organism growth	12	0.00558403	0.173155	ENSRNOG00000028368, ENSRNOG00000049232, ENSRNOG00000020060, ENSRNOG00000013994, ENSRNOG00000010588, ENSRNOG00000025889, ENSRNOG00000016617, ENSRNOG00000001227, ENSRNOG00000008332, ENSRNOG00000019584, ENSRNOG00000012499, ENSRNOG00000004917
MF	GO:0030246	carbohydrate binding	15	0.00565463	0.180731	ENSRNOG00000030149, ENSRNOG00000007951, ENSRNOG00000029911, ENSRNOG00000004438, ENSRNOG00000004589, ENSRNOG00000006548, ENSRNOG00000017021, ENSRNOG00000002926, ENSRNOG00000016366, ENSRNOG00000024435, ENSRNOG00000021243, ENSRNOG00000030726, ENSRNOG00000004540, ENSRNOG00000029212, ENSRNOG00000040242
BP	GO:0007275	multicellular organism development	9	0.00589643	0.181224	ENSRNOG00000004332, ENSRNOG00000014751, ENSRNOG00000002024, ENSRNOG00000006565, ENSRNOG00000002746, ENSRNOG00000016050, ENSRNOG00000013213, ENSRNOG00000020716, ENSRNOG00000047002
BP	GO:0032869	cellular response to insulin stimulus	13	0.00597729	0.181891	ENSRNOG00000007159, ENSRNOG00000009832, ENSRNOG00000007319, ENSRNOG00000001414, ENSRNOG00000010780, ENSRNOG00000059579, ENSRNOG00000015880, ENSRNOG00000008292, ENSRNOG00000014597, ENSRNOG00000015654, ENSRNOG00000013994, ENSRNOG00000022239, ENSRNOG00000015658
BP	GO:0060384	innervation	5	0.0060229	0.181891	ENSRNOG00000014751, ENSRNOG00000001227, ENSRNOG00000006052, ENSRNOG00000003680, ENSRNOG00000015461
BP	GO:0031623	receptor internalization	7	0.00620087	0.185652	ENSRNOG00000033835, ENSRNOG00000019556, ENSRNOG00000019622, ENSRNOG00000015654, ENSRNOG00000056836, ENSRNOG00000001963, ENSRNOG00000001959
BP	GO:0000122	negative regulation of transcription from RNA polymerase II promoter	48	0.00633922	0.188172	ENSRNOG00000006997, ENSRNOG00000012937, ENSRNOG00000056716, ENSRNOG00000010997, ENSRNOG00000003720, ENSRNOG00000056836, ENSRNOG00000002414, ENSRNOG00000005964, ENSRNOG00000003745, ENSRNOG00000008658, ENSRNOG00000009329, ENSRNOG00000055340, ENSRNOG00000020918, ENSRNOG00000000138, ENSRNOG00000012499, ENSRNOG00000019598, ENSRNOG00000008170, ENSRNOG00000046912, ENSRNOG00000008292, ENSRNOG00000020369,…
MF	GO:0030169	low-density lipoprotein particle binding	5	0.00645677	0.198725	ENSRNOG00000016488, ENSRNOG00000016366, ENSRNOG00000018434, ENSRNOG00000012779, ENSRNOG00000029212
BP	GO:2000546	positive regulation of endothelial cell chemotaxis to fibroblast growth factor	3	0.00666545	0.194202	ENSRNOG00000017392, ENSRNOG00000016050, ENSRNOG00000048389
BP	GO:0014068	positive regulation of phosphatidylinositol 3-kinase signaling	9	0.00683472	0.194202	ENSRNOG00000004554, ENSRNOG00000014288, ENSRNOG00000009848, ENSRNOG00000018445, ENSRNOG00000006631, ENSRNOG00000001312, ENSRNOG00000005854, ENSRNOG00000017392, ENSRNOG00000019598
BP	GO:0007507	heart development	21	0.00685487	0.194202	ENSRNOG00000002146, ENSRNOG00000007302, ENSRNOG00000006526, ENSRNOG00000012655, ENSRNOG00000012840, ENSRNOG00000034258, ENSRNOG00000052469, ENSRNOG00000000614, ENSRNOG00000050794, ENSRNOG00000033280, ENSRNOG00000014288, ENSRNOG00000015488, ENSRNOG00000023309, ENSRNOG00000013994, ENSRNOG00000014426, ENSRNOG00000016419, ENSRNOG00000008478, ENSRNOG00000018905, ENSRNOG00000007036, ENSRNOG00000029212,…
BP	GO:0032835	glomerulus development	4	0.00691232	0.194202	ENSRNOG00000014276, ENSRNOG00000016617, ENSRNOG00000051854, ENSRNOG00000030715
BP	GO:0048762	mesenchymal cell differentiation	4	0.00691232	0.194202	ENSRNOG00000016617, ENSRNOG00000016050, ENSRNOG00000053384, ENSRNOG00000007036
BP	GO:0090190	positive regulation of branching involved in ureteric bud morphogenesis	5	0.00709722	0.194202	ENSRNOG00000018445, ENSRNOG00000026053, ENSRNOG00000008332, ENSRNOG00000005715, ENSRNOG00000019598
BP	GO:0031589	cell-substrate adhesion	5	0.00709722	0.194202	ENSRNOG00000009173, ENSRNOG00000005854, ENSRNOG00000015658, ENSRNOG00000058111, ENSRNOG00000004912
BP	GO:1901214	regulation of neuron death	5	0.00709722	0.194202	ENSRNOG00000013141, ENSRNOG00000016460, ENSRNOG00000018454, ENSRNOG00000033099, ENSRNOG00000058006
BP	GO:0010595	positive regulation of endothelial cell migration	8	0.00711211	0.194202	ENSRNOG00000014166, ENSRNOG00000018445, ENSRNOG00000008116, ENSRNOG00000005854, ENSRNOG00000017392, ENSRNOG00000012840, ENSRNOG00000019598, ENSRNOG00000004165
BP	GO:0051966	regulation of synaptic transmission, glutamatergic	6	0.00715747	0.194202	ENSRNOG00000026573, ENSRNOG00000016872, ENSRNOG00000026705, ENSRNOG00000005519, ENSRNOG00000015461, ENSRNOG00000047014
BP	GO:0042246	tissue regeneration	6	0.00715747	0.194202	ENSRNOG00000005093, ENSRNOG00000004303, ENSRNOG00000001414, ENSRNOG00000020716, ENSRNOG00000001528, ENSRNOG00000018991
BP	GO:0014070	response to organic cyclic compound	21	0.00731485	0.196202	ENSRNOG00000002265, ENSRNOG00000004332, ENSRNOG00000010997, ENSRNOG00000011107, ENSRNOG00000046261, ENSRNOG00000004303, ENSRNOG00000006966, ENSRNOG00000020918, ENSRNOG00000058111, ENSRNOG00000016552, ENSRNOG00000034013, ENSRNOG00000052564, ENSRNOG00000013141, ENSRNOG00000038483, ENSRNOG00000017105, ENSRNOG00000020369, ENSRNOG00000018659, ENSRNOG00000005195, ENSRNOG00000021155, ENSRNOG00000004077,…
BP	GO:0043406	positive regulation of MAP kinase activity	9	0.00734414	0.196202	ENSRNOG00000006997, ENSRNOG00000004332, ENSRNOG00000015654, ENSRNOG00000001312, ENSRNOG00000017392, ENSRNOG00000016182, ENSRNOG00000016050, ENSRNOG00000019598, ENSRNOG00000048389
MF	GO:0003725	double-stranded RNA binding	9	0.00765929	0.227317	ENSRNOG00000001187, ENSRNOG00000018247, ENSRNOG00000049282, ENSRNOG00000028814, ENSRNOG00000059097, ENSRNOG00000001369, ENSRNOG00000006384, ENSRNOG00000001227, ENSRNOG00000048315
BP	GO:0090090	negative regulation of canonical Wnt signaling pathway	12	0.00773936	0.205182	ENSRNOG00000006997, ENSRNOG00000049232, ENSRNOG00000028930, ENSRNOG00000007765, ENSRNOG00000026053, ENSRNOG00000014940, ENSRNOG00000056836, ENSRNOG00000016617, ENSRNOG00000056343, ENSRNOG00000000614, ENSRNOG00000018454, ENSRNOG00000025881
CC	GO:0042383	sarcolemma	12	0.00854847	0.103256	ENSRNOG00000006645, ENSRNOG00000001807, ENSRNOG00000001254, ENSRNOG00000014686, ENSRNOG00000008479, ENSRNOG00000056836, ENSRNOG00000012207, ENSRNOG00000046905, ENSRNOG00000025889, ENSRNOG00000001249, ENSRNOG00000007284, ENSRNOG00000002372
BP	GO:0071363	cellular response to growth factor stimulus	10	0.00864897	0.223718	ENSRNOG00000004332, ENSRNOG00000002158, ENSRNOG00000017428, ENSRNOG00000001414, ENSRNOG00000016460, ENSRNOG00000012840, ENSRNOG00000052469, ENSRNOG00000018454, ENSRNOG00000007036, ENSRNOG00000005033
BP	GO:0071679	commissural neuron axon guidance	4	0.00876064	0.223718	ENSRNOG00000008332, ENSRNOG00000031890, ENSRNOG00000009795, ENSRNOG00000019598
BP	GO:0010717	regulation of epithelial to mesenchymal transition	4	0.00876064	0.223718	ENSRNOG00000026053, ENSRNOG00000002171, ENSRNOG00000026985, ENSRNOG00000007036
BP	GO:0050803	regulation of synapse structure or activity	4	0.00876064	0.223718	ENSRNOG00000006997, ENSRNOG00000033835, ENSRNOG00000001963, ENSRNOG00000001959
BP	GO:0002067	glandular epithelial cell differentiation	4	0.00876064	0.223718	ENSRNOG00000008292, ENSRNOG00000005933, ENSRNOG00000056836, ENSRNOG00000009795
BP	GO:0048754	branching morphogenesis of an epithelial tube	6	0.00901361	0.228498	ENSRNOG00000002265, ENSRNOG00000011977, ENSRNOG00000053384, ENSRNOG00000019598, ENSRNOG00000005695, ENSRNOG00000058742
BP	GO:0030031	cell projection assembly	5	0.00960844	0.241812	ENSRNOG00000017500, ENSRNOG00000004498, ENSRNOG00000007518, ENSRNOG00000001312, ENSRNOG00000018991
CC	GO:0008305	integrin complex	5	0.00982819	0.11567	ENSRNOG00000006569, ENSRNOG00000046639, ENSRNOG00000004516, ENSRNOG00000004912, ENSRNOG00000043167
BP	GO:0055088	lipid homeostasis	7	0.00993009	0.247683	ENSRNOG00000046912, ENSRNOG00000013552, ENSRNOG00000056716, ENSRNOG00000030726, ENSRNOG00000039091, ENSRNOG00000018454, ENSRNOG00000034013
BP	GO:0070507	regulation of microtubule cytoskeleton organization	6	0.0100557	0.247683	ENSRNOG00000010260, ENSRNOG00000003613, ENSRNOG00000028261, ENSRNOG00000002171, ENSRNOG00000026985, ENSRNOG00000007894
BP	GO:0051781	positive regulation of cell division	6	0.0100557	0.247683	ENSRNOG00000012471, ENSRNOG00000001312, ENSRNOG00000020369, ENSRNOG00000017392, ENSRNOG00000016182, ENSRNOG00000019598
BP	GO:0030199	collagen fibril organization	7	0.0108333	0.258299	ENSRNOG00000026053, ENSRNOG00000016758, ENSRNOG00000014426, ENSRNOG00000050655, ENSRNOG00000007036, ENSRNOG00000002947, ENSRNOG00000028344
BP	GO:0030316	osteoclast differentiation	7	0.0108333	0.258299	ENSRNOG00000007159, ENSRNOG00000013994, ENSRNOG00000011944, ENSRNOG00000018051, ENSRNOG00000046261, ENSRNOG00000018659, ENSRNOG00000008658
BP	GO:0060978	angiogenesis involved in coronary vascular morphogenesis	3	0.0108585	0.258299	ENSRNOG00000017392, ENSRNOG00000019598, ENSRNOG00000007036
BP	GO:1902632	positive regulation of membrane hyperpolarization	3	0.0108585	0.258299	ENSRNOG00000018445, ENSRNOG00000055382, ENSRNOG00000001195
BP	GO:0071344	diphosphate metabolic process	3	0.0108585	0.258299	ENSRNOG00000013994, ENSRNOG00000010960, ENSRNOG00000016050
CC	GO:0098844	postsynaptic endocytic zone membrane	3	0.0109969	0.12619	ENSRNOG00000033835, ENSRNOG00000001963, ENSRNOG00000001959
BP	GO:0048661	positive regulation of smooth muscle cell proliferation	9	0.011023	0.258667	ENSRNOG00000008292, ENSRNOG00000018646, ENSRNOG00000009848, ENSRNOG00000004332, ENSRNOG00000014117, ENSRNOG00000005964, ENSRNOG00000017392, ENSRNOG00000058111, ENSRNOG00000019598
BP	GO:0010977	negative regulation of neuron projection development	9	0.011023	0.258667	ENSRNOG00000009419, ENSRNOG00000017568, ENSRNOG00000028930, ENSRNOG00000003553, ENSRNOG00000023337, ENSRNOG00000013656, ENSRNOG00000013213, ENSRNOG00000018454, ENSRNOG00000001195
MF	GO:0005025	transforming growth factor beta receptor activity, type I	3	0.0112843	0.323352	ENSRNOG00000052469, ENSRNOG00000007036, ENSRNOG00000005033
BP	GO:0030509	BMP signaling pathway	10	0.0116191	0.270826	ENSRNOG00000013340, ENSRNOG00000033209, ENSRNOG00000049232, ENSRNOG00000009173, ENSRNOG00000015357, ENSRNOG00000052469, ENSRNOG00000053384, ENSRNOG00000002093, ENSRNOG00000004330, ENSRNOG00000005033
MF	GO:0050750	low-density lipoprotein particle receptor binding	5	0.0118264	0.327592	ENSRNOG00000006997, ENSRNOG00000028930, ENSRNOG00000016460, ENSRNOG00000008478, ENSRNOG00000018454
BP	GO:0009888	tissue development	6	0.0123815	0.286674	ENSRNOG00000013340, ENSRNOG00000059507, ENSRNOG00000045636, ENSRNOG00000002667, ENSRNOG00000006025, ENSRNOG00000005573
BP	GO:0031100	animal organ regeneration	9	0.0125085	0.287695	ENSRNOG00000007159, ENSRNOG00000056836, ENSRNOG00000005964, ENSRNOG00000005854, ENSRNOG00000020918, ENSRNOG00000031890, ENSRNOG00000002093, ENSRNOG00000020716, ENSRNOG00000007036
BP	GO:0006970	response to osmotic stress	5	0.0126347	0.288685	ENSRNOG00000004332, ENSRNOG00000011879, ENSRNOG00000016291, ENSRNOG00000007284, ENSRNOG00000001195
BP	GO:0034446	substrate adhesion-dependent cell spreading	7	0.0128112	0.290806	ENSRNOG00000059507, ENSRNOG00000014288, ENSRNOG00000004912, ENSRNOG00000006025, ENSRNOG00000020716, ENSRNOG00000005573, ENSRNOG00000024089
BP	GO:0050808	synapse organization	8	0.0130325	0.293909	ENSRNOG00000006997, ENSRNOG00000004642, ENSRNOG00000030149, ENSRNOG00000006631, ENSRNOG00000030515, ENSRNOG00000000879, ENSRNOG00000012807, ENSRNOG00000058006
CC	GO:0098978	glutamatergic synapse	29	0.0130515	0.146113	ENSRNOG00000033835, ENSRNOG00000030149, ENSRNOG00000028404, ENSRNOG00000004314, ENSRNOG00000004810, ENSRNOG00000011203, ENSRNOG00000031890, ENSRNOG00000032884, ENSRNOG00000011441, ENSRNOG00000050994, ENSRNOG00000026705, ENSRNOG00000008376, ENSRNOG00000043085, ENSRNOG00000002051, ENSRNOG00000026573, ENSRNOG00000008428, ENSRNOG00000028832, ENSRNOG00000019181, ENSRNOG00000005519, ENSRNOG00000012840,…
BP	GO:0030206	chondroitin sulfate biosynthetic process	4	0.0132489	0.296861	ENSRNOG00000056658, ENSRNOG00000050152, ENSRNOG00000002643, ENSRNOG00000014713
BP	GO:0002027	regulation of heart rate	6	0.0136705	0.300492	ENSRNOG00000008428, ENSRNOG00000028225, ENSRNOG00000018445, ENSRNOG00000010997, ENSRNOG00000008479, ENSRNOG00000023337
BP	GO:0032728	positive regulation of interferon-beta production	6	0.0136705	0.300492	ENSRNOG00000018247, ENSRNOG00000017414, ENSRNOG00000056716, ENSRNOG00000049282, ENSRNOG00000001369, ENSRNOG00000006384
BP	GO:0040018	positive regulation of multicellular organism growth	6	0.0136705	0.300492	ENSRNOG00000008428, ENSRNOG00000018445, ENSRNOG00000015654, ENSRNOG00000020369, ENSRNOG00000018659, ENSRNOG00000008332
BP	GO:0051496	positive regulation of stress fiber assembly	7	0.0138894	0.303119	ENSRNOG00000016576, ENSRNOG00000004057, ENSRNOG00000013656, ENSRNOG00000023226, ENSRNOG00000007036, ENSRNOG00000050794, ENSRNOG00000014297
BP	GO:0030593	neutrophil chemotaxis	8	0.0139646	0.303119	ENSRNOG00000007159, ENSRNOG00000029768, ENSRNOG00000009390, ENSRNOG00000022256, ENSRNOG00000043451, ENSRNOG00000000239, ENSRNOG00000015880, ENSRNOG00000043167
MF	GO:0030297	transmembrane receptor protein tyrosine kinase activator activity	4	0.013977	0.350905	ENSRNOG00000018646, ENSRNOG00000004332, ENSRNOG00000026053, ENSRNOG00000016182
MF	GO:0030247	polysaccharide binding	4	0.013977	0.350905	ENSRNOG00000002385, ENSRNOG00000013994, ENSRNOG00000004089, ENSRNOG00000040242
MF	GO:0002020	protease binding	11	0.0140262	0.350905	ENSRNOG00000049385, ENSRNOG00000028896, ENSRNOG00000014288, ENSRNOG00000038483, ENSRNOG00000004303, ENSRNOG00000005679, ENSRNOG00000001314, ENSRNOG00000005195, ENSRNOG00000021166, ENSRNOG00000001414, ENSRNOG00000004912
BP	GO:0048843	negative regulation of axon extension involved in axon guidance	5	0.0143514	0.309581	ENSRNOG00000006631, ENSRNOG00000011977, ENSRNOG00000023337, ENSRNOG00000006526, ENSRNOG00000007202
CC	GO:0043296	apical junction complex	5	0.0146718	0.160342	ENSRNOG00000002176, ENSRNOG00000010903, ENSRNOG00000054080, ENSRNOG00000007329, ENSRNOG00000002959
BP	GO:0045444	fat cell differentiation	9	0.0150048	0.321678	ENSRNOG00000049232, ENSRNOG00000009173, ENSRNOG00000020060, ENSRNOG00000008622, ENSRNOG00000013994, ENSRNOG00000005964, ENSRNOG00000004810, ENSRNOG00000020918, ENSRNOG00000000138
CC	GO:0042995	cell projection	13	0.0152119	0.162378	ENSRNOG00000005697, ENSRNOG00000008479, ENSRNOG00000012148, ENSRNOG00000058111, ENSRNOG00000013213, ENSRNOG00000000814, ENSRNOG00000014961, ENSRNOG00000013994, ENSRNOG00000016419, ENSRNOG00000008376, ENSRNOG00000005195, ENSRNOG00000043451, ENSRNOG00000043085
BP	GO:0021953	central nervous system neuron differentiation	4	0.0158996	0.326259	ENSRNOG00000004642, ENSRNOG00000027869, ENSRNOG00000008332, ENSRNOG00000052469
BP	GO:0016322	neuron remodeling	4	0.0158996	0.326259	ENSRNOG00000006997, ENSRNOG00000018051, ENSRNOG00000005573, ENSRNOG00000012807
BP	GO:0030857	negative regulation of epithelial cell differentiation	4	0.0158996	0.326259	ENSRNOG00000005933, ENSRNOG00000056836, ENSRNOG00000020918, ENSRNOG00000008332
BP	GO:0033591	response to L-ascorbic acid	4	0.0158996	0.326259	ENSRNOG00000013994, ENSRNOG00000046261, ENSRNOG00000012840, ENSRNOG00000058111
BP	GO:0048368	lateral mesoderm development	3	0.0159215	0.326259	ENSRNOG00000015488, ENSRNOG00000005933, ENSRNOG00000052469
BP	GO:0034103	regulation of tissue remodeling	3	0.0159215	0.326259	ENSRNOG00000012471, ENSRNOG00000008816, ENSRNOG00000005195
BP	GO:1990079	cartilage homeostasis	3	0.0159215	0.326259	ENSRNOG00000012508, ENSRNOG00000028108, ENSRNOG00000001195
BP	GO:0001570	vasculogenesis	8	0.0159701	0.326259	ENSRNOG00000019622, ENSRNOG00000005933, ENSRNOG00000013994, ENSRNOG00000056836, ENSRNOG00000006569, ENSRNOG00000008332, ENSRNOG00000004912, ENSRNOG00000002093
CC	GO:0043196	varicosity	4	0.016181	0.168797	ENSRNOG00000033835, ENSRNOG00000018778, ENSRNOG00000027264, ENSRNOG00000017428
MF	GO:0004528	phosphodiesterase I activity	3	0.0165382	0.350905	ENSRNOG00000013994, ENSRNOG00000004089, ENSRNOG00000013791
MF	GO:1990430	extracellular matrix protein binding	3	0.0165382	0.350905	ENSRNOG00000002154, ENSRNOG00000006569, ENSRNOG00000004912
MF	GO:0031727	CCR2 chemokine receptor binding	3	0.0165382	0.350905	ENSRNOG00000007159, ENSRNOG00000029768, ENSRNOG00000000239
MF	GO:0003779	actin binding	18	0.016745	0.350905	ENSRNOG00000026573, ENSRNOG00000004057, ENSRNOG00000049452, ENSRNOG00000012207, ENSRNOG00000019181, ENSRNOG00000006804, ENSRNOG00000010233, ENSRNOG00000018991, ENSRNOG00000050794, ENSRNOG00000017500, ENSRNOG00000010260, ENSRNOG00000018797, ENSRNOG00000017428, ENSRNOG00000042978, ENSRNOG00000016419, ENSRNOG00000001195, ENSRNOG00000011619
BP	GO:0072089	stem cell proliferation	8	0.0170458	0.346199	ENSRNOG00000005933, ENSRNOG00000003720, ENSRNOG00000009795, ENSRNOG00000017392, ENSRNOG00000016050, ENSRNOG00000012499, ENSRNOG00000019598, ENSRNOG00000025332
MF	GO:0004867	serine-type endopeptidase inhibitor activity	10	0.0171651	0.350905	ENSRNOG00000006997, ENSRNOG00000028896, ENSRNOG00000018445, ENSRNOG00000017689, ENSRNOG00000010478, ENSRNOG00000001414, ENSRNOG00000004208, ENSRNOG00000015461, ENSRNOG00000011141, ENSRNOG00000025332
MF	GO:0008270	zinc ion binding	38	0.0172601	0.350905	ENSRNOG00000011989, ENSRNOG00000005964, ENSRNOG00000009329, ENSRNOG00000002878, ENSRNOG00000055340, ENSRNOG00000012499, ENSRNOG00000011024, ENSRNOG00000018268, ENSRNOG00000005708, ENSRNOG00000013791, ENSRNOG00000046912, ENSRNOG00000018247, ENSRNOG00000013994, ENSRNOG00000029330, ENSRNOG00000008478, ENSRNOG00000023257, ENSRNOG00000028344, ENSRNOG00000027145, ENSRNOG00000033528, ENSRNOG00000008765,…
MF	GO:0043236	laminin binding	5	0.017313	0.350905	ENSRNOG00000021166, ENSRNOG00000011411, ENSRNOG00000058111, ENSRNOG00000021157, ENSRNOG00000043167
MF	GO:0045499	chemorepellent activity	5	0.017313	0.350905	ENSRNOG00000006631, ENSRNOG00000011977, ENSRNOG00000023337, ENSRNOG00000006526, ENSRNOG00000007202
MF	GO:0005267	potassium channel activity	6	0.01784	0.352977	ENSRNOG00000002146, ENSRNOG00000047363, ENSRNOG00000014686, ENSRNOG00000019937, ENSRNOG00000032350, ENSRNOG00000013312
BP	GO:1900026	positive regulation of substrate adhesion-dependent cell spreading	6	0.0180707	0.353322	ENSRNOG00000016576, ENSRNOG00000028930, ENSRNOG00000023226, ENSRNOG00000053450, ENSRNOG00000004089, ENSRNOG00000018683
BP	GO:0048675	axon extension	6	0.0180707	0.353322	ENSRNOG00000011977, ENSRNOG00000023337, ENSRNOG00000017428, ENSRNOG00000032922, ENSRNOG00000009390, ENSRNOG00000000879
BP	GO:0010634	positive regulation of epithelial cell migration	6	0.0180707	0.353322	ENSRNOG00000008292, ENSRNOG00000014597, ENSRNOG00000004696, ENSRNOG00000058111, ENSRNOG00000004089, ENSRNOG00000018683
BP	GO:0060326	cell chemotaxis	8	0.0181716	0.353322	ENSRNOG00000018646, ENSRNOG00000019622, ENSRNOG00000011977, ENSRNOG00000014426, ENSRNOG00000013656, ENSRNOG00000008697, ENSRNOG00000019598, ENSRNOG00000004089
BP	GO:0001935	endothelial cell proliferation	5	0.0182104	0.353322	ENSRNOG00000056836, ENSRNOG00000016758, ENSRNOG00000017392, ENSRNOG00000019598, ENSRNOG00000007036
BP	GO:0045453	bone resorption	5	0.0182104	0.353322	ENSRNOG00000013994, ENSRNOG00000011944, ENSRNOG00000046261, ENSRNOG00000021155, ENSRNOG00000021157
BP	GO:0043393	regulation of protein binding	5	0.0182104	0.353322	ENSRNOG00000006997, ENSRNOG00000011789, ENSRNOG00000005854, ENSRNOG00000002093, ENSRNOG00000007036
BP	GO:0002092	positive regulation of receptor internalization	5	0.0182104	0.353322	ENSRNOG00000008428, ENSRNOG00000028930, ENSRNOG00000026053, ENSRNOG00000005854, ENSRNOG00000019598
BP	GO:0001501	skeletal system development	10	0.0187958	0.361231	ENSRNOG00000007302, ENSRNOG00000024998, ENSRNOG00000025889, ENSRNOG00000024207, ENSRNOG00000001314, ENSRNOG00000011763, ENSRNOG00000007036, ENSRNOG00000004540, ENSRNOG00000005708, ENSRNOG00000029212
BP	GO:0010744	positive regulation of macrophage derived foam cell differentiation	4	0.018826	0.361231	ENSRNOG00000009848, ENSRNOG00000018445, ENSRNOG00000012779, ENSRNOG00000018659
CC	GO:0098797	plasma membrane protein complex	4	0.0191559	0.195391	ENSRNOG00000014751, ENSRNOG00000017438, ENSRNOG00000023226, ENSRNOG00000007025
BP	GO:0045893	positive regulation of transcription, DNA-templated	37	0.0195652	0.373351	ENSRNOG00000004332, ENSRNOG00000053787, ENSRNOG00000020060, ENSRNOG00000007445, ENSRNOG00000003544, ENSRNOG00000005964, ENSRNOG00000008658, ENSRNOG00000004810, ENSRNOG00000009329, ENSRNOG00000000138, ENSRNOG00000017392, ENSRNOG00000053384, ENSRNOG00000033099, ENSRNOG00000016102, ENSRNOG00000046912, ENSRNOG00000008292, ENSRNOG00000018445, ENSRNOG00000017414, ENSRNOG00000008332, ENSRNOG00000027145,…
BP	GO:0042632	cholesterol homeostasis	9	0.0199392	0.378408	ENSRNOG00000027145, ENSRNOG00000009848, ENSRNOG00000042603, ENSRNOG00000056836, ENSRNOG00000009329, ENSRNOG00000009730, ENSRNOG00000018454, ENSRNOG00000059801, ENSRNOG00000018694
CC	GO:0044295	axonal growth cone	6	0.0202305	0.201697	ENSRNOG00000008332, ENSRNOG00000013213, ENSRNOG00000018350, ENSRNOG00000002041, ENSRNOG00000033099, ENSRNOG00000011619
BP	GO:0035094	response to nicotine	7	0.0202374	0.380138	ENSRNOG00000008428, ENSRNOG00000028404, ENSRNOG00000019937, ENSRNOG00000014117, ENSRNOG00000020369, ENSRNOG00000008943, ENSRNOG00000047014
BP	GO:1900273	positive regulation of long-term synaptic potentiation	5	0.0203587	0.380138	ENSRNOG00000006997, ENSRNOG00000008428, ENSRNOG00000009514, ENSRNOG00000001525, ENSRNOG00000007089
BP	GO:0001892	embryonic placenta development	5	0.0203587	0.380138	ENSRNOG00000008292, ENSRNOG00000004332, ENSRNOG00000002146, ENSRNOG00000008479, ENSRNOG00000020369
CC	GO:0001726	ruffle	9	0.0206531	0.201697	ENSRNOG00000017500, ENSRNOG00000014961, ENSRNOG00000007764, ENSRNOG00000007518, ENSRNOG00000025889, ENSRNOG00000053450, ENSRNOG00000059801, ENSRNOG00000050994, ENSRNOG00000018991
BP	GO:0034097	response to cytokine	9	0.0210497	0.39094	ENSRNOG00000033192, ENSRNOG00000015654, ENSRNOG00000046261, ENSRNOG00000004303, ENSRNOG00000001414, ENSRNOG00000030715, ENSRNOG00000012840, ENSRNOG00000009263, ENSRNOG00000002051
BP	GO:0001974	blood vessel remodeling	6	0.0214702	0.392113	ENSRNOG00000010903, ENSRNOG00000011568, ENSRNOG00000006526, ENSRNOG00000002093, ENSRNOG00000020716, ENSRNOG00000019598
BP	GO:0043491	protein kinase B signaling	7	0.0217089	0.392113	ENSRNOG00000008428, ENSRNOG00000014597, ENSRNOG00000007159, ENSRNOG00000014426, ENSRNOG00000017392, ENSRNOG00000020716, ENSRNOG00000014481
BP	GO:0003015	heart process	3	0.0217903	0.392113	ENSRNOG00000005933, ENSRNOG00000016617, ENSRNOG00000002372
BP	GO:0003223	ventricular compact myocardium morphogenesis	3	0.0217903	0.392113	ENSRNOG00000052469, ENSRNOG00000002093, ENSRNOG00000007036
BP	GO:0071529	cementum mineralization	3	0.0217903	0.392113	ENSRNOG00000013994, ENSRNOG00000010960, ENSRNOG00000016050
BP	GO:1900452	regulation of long term synaptic depression	3	0.0217903	0.392113	ENSRNOG00000028832, ENSRNOG00000026705, ENSRNOG00000008943
BP	GO:0010633	negative regulation of epithelial cell migration	4	0.0220298	0.392357	ENSRNOG00000009419, ENSRNOG00000016291, ENSRNOG00000023337, ENSRNOG00000002093
BP	GO:0007178	transmembrane receptor protein serine/threonine kinase signaling pathway	4	0.0220298	0.392357	ENSRNOG00000024998, ENSRNOG00000002093, ENSRNOG00000007036, ENSRNOG00000005033
MF	GO:0008092	cytoskeletal protein binding	7	0.0220601	0.426325	ENSRNOG00000002146, ENSRNOG00000049452, ENSRNOG00000008479, ENSRNOG00000018051, ENSRNOG00000011203, ENSRNOG00000056550, ENSRNOG00000031890
CC	GO:0045180	basal cortex	3	0.0220614	0.205744	ENSRNOG00000002146, ENSRNOG00000002171, ENSRNOG00000026985
CC	GO:0044327	dendritic spine head	4	0.0224122	0.205744	ENSRNOG00000033835, ENSRNOG00000028404, ENSRNOG00000001963, ENSRNOG00000001959
CC	GO:0031258	lamellipodium membrane	4	0.0224122	0.205744	ENSRNOG00000014961, ENSRNOG00000007518, ENSRNOG00000005679, ENSRNOG00000004912
BP	GO:0009267	cellular response to starvation	8	0.0245902	0.435723	ENSRNOG00000000164, ENSRNOG00000049232, ENSRNOG00000014256, ENSRNOG00000056836, ENSRNOG00000007879, ENSRNOG00000020479, ENSRNOG00000008850, ENSRNOG00000051860
BP	GO:0042220	response to cocaine	7	0.0248649	0.43614	ENSRNOG00000008428, ENSRNOG00000030149, ENSRNOG00000028404, ENSRNOG00000023601, ENSRNOG00000031890, ENSRNOG00000047014, ENSRNOG00000058006
BP	GO:0048678	response to axon injury	7	0.0248649	0.43614	ENSRNOG00000008428, ENSRNOG00000011107, ENSRNOG00000017428, ENSRNOG00000005195, ENSRNOG00000017392, ENSRNOG00000048723, ENSRNOG00000020716
BP	GO:0070328	triglyceride homeostasis	5	0.0251055	0.436462	ENSRNOG00000027145, ENSRNOG00000009848, ENSRNOG00000007545, ENSRNOG00000039091, ENSRNOG00000018454
BP	GO:0071310	cellular response to organic substance	6	0.0252605	0.436462	ENSRNOG00000004303, ENSRNOG00000014426, ENSRNOG00000020918, ENSRNOG00000010188, ENSRNOG00000004540, ENSRNOG00000037563
BP	GO:0061098	positive regulation of protein tyrosine kinase activity	6	0.0252605	0.436462	ENSRNOG00000006997, ENSRNOG00000018445, ENSRNOG00000004332, ENSRNOG00000026053, ENSRNOG00000013213, ENSRNOG00000001195
CC	GO:0099055	integral component of postsynaptic membrane	8	0.0253766	0.221318	ENSRNOG00000008428, ENSRNOG00000018778, ENSRNOG00000027264, ENSRNOG00000005697, ENSRNOG00000008479, ENSRNOG00000005519, ENSRNOG00000031890, ENSRNOG00000013213
CC	GO:0000139	Golgi membrane	23	0.0253957	0.221318	ENSRNOG00000008428, ENSRNOG00000031203, ENSRNOG00000003114, ENSRNOG00000056658, ENSRNOG00000007951, ENSRNOG00000008116, ENSRNOG00000056836, ENSRNOG00000012019, ENSRNOG00000004589, ENSRNOG00000007879, ENSRNOG00000050404, ENSRNOG00000017021, ENSRNOG00000055286, ENSRNOG00000016398, ENSRNOG00000014276, ENSRNOG00000016953, ENSRNOG00000024207, ENSRNOG00000024435, ENSRNOG00000005063, ENSRNOG00000043085,…
BP	GO:0042325	regulation of phosphorylation	4	0.0255116	0.436462	ENSRNOG00000016368, ENSRNOG00000053384, ENSRNOG00000003715, ENSRNOG00000040242
BP	GO:0035641	locomotory exploration behavior	4	0.0255116	0.436462	ENSRNOG00000031852, ENSRNOG00000004900, ENSRNOG00000008943, ENSRNOG00000018454
CC	GO:0005911	cell-cell junction	15	0.0255552	0.221318	ENSRNOG00000006997, ENSRNOG00000003365, ENSRNOG00000030149, ENSRNOG00000002176, ENSRNOG00000010903, ENSRNOG00000002146, ENSRNOG00000031890, ENSRNOG00000001525, ENSRNOG00000053450, ENSRNOG00000030210, ENSRNOG00000000814, ENSRNOG00000018778, ENSRNOG00000030418, ENSRNOG00000007284, ENSRNOG00000004165
MF	GO:0004653	polypeptide N-acetylgalactosaminyltransferase activity	4	0.0268604	0.49992	ENSRNOG00000007951, ENSRNOG00000004589, ENSRNOG00000024435, ENSRNOG00000017021
BP	GO:0010718	positive regulation of epithelial to mesenchymal transition	6	0.0273064	0.464877	ENSRNOG00000028930, ENSRNOG00000014961, ENSRNOG00000016758, ENSRNOG00000016617, ENSRNOG00000053384, ENSRNOG00000007036
CC	GO:0043005	neuron projection	29	0.0273195	0.232207	ENSRNOG00000006997, ENSRNOG00000004697, ENSRNOG00000056558, ENSRNOG00000011826, ENSRNOG00000011107, ENSRNOG00000031890, ENSRNOG00000016460, ENSRNOG00000013141, ENSRNOG00000014686, ENSRNOG00000013994, ENSRNOG00000013656, ENSRNOG00000003680, ENSRNOG00000002051, ENSRNOG00000002265, ENSRNOG00000053334, ENSRNOG00000002024, ENSRNOG00000005697, ENSRNOG00000030515, ENSRNOG00000002126, ENSRNOG00000004900,…
BP	GO:0042127	regulation of cell proliferation	14	0.0275061	0.464881	ENSRNOG00000002385, ENSRNOG00000027595, ENSRNOG00000004057, ENSRNOG00000004332, ENSRNOG00000002146, ENSRNOG00000005933, ENSRNOG00000008658, ENSRNOG00000001414, ENSRNOG00000016050, ENSRNOG00000016460, ENSRNOG00000012840, ENSRNOG00000008292, ENSRNOG00000015488, ENSRNOG00000022256
BP	GO:0002052	positive regulation of neuroblast proliferation	5	0.0277081	0.464881	ENSRNOG00000008428, ENSRNOG00000008292, ENSRNOG00000008332, ENSRNOG00000017392, ENSRNOG00000019598
BP	GO:0014003	oligodendrocyte development	5	0.0277081	0.464881	ENSRNOG00000049232, ENSRNOG00000019556, ENSRNOG00000013656, ENSRNOG00000028261, ENSRNOG00000018991
BP	GO:0003183	mitral valve morphogenesis	3	0.0284043	0.465321	ENSRNOG00000009173, ENSRNOG00000052469, ENSRNOG00000005033
BP	GO:0038134	ERBB2-EGFR signaling pathway	3	0.0284043	0.465321	ENSRNOG00000018646, ENSRNOG00000004332, ENSRNOG00000016182
BP	GO:0003374	dynamin family protein polymerization involved in mitochondrial fission	3	0.0284043	0.465321	ENSRNOG00000033835, ENSRNOG00000001963, ENSRNOG00000001959
BP	GO:0016185	synaptic vesicle budding from presynaptic endocytic zone membrane	3	0.0284043	0.465321	ENSRNOG00000033835, ENSRNOG00000001963, ENSRNOG00000001959
BP	GO:0035239	tube morphogenesis	3	0.0284043	0.465321	ENSRNOG00000014961, ENSRNOG00000005715, ENSRNOG00000053384
CC	GO:0032587	ruffle membrane	8	0.0284149	0.232207	ENSRNOG00000017500, ENSRNOG00000004332, ENSRNOG00000014961, ENSRNOG00000013884, ENSRNOG00000006384, ENSRNOG00000004912, ENSRNOG00000010780, ENSRNOG00000001195
MF	GO:0051015	actin filament binding	15	0.0285667	0.49992	ENSRNOG00000004332, ENSRNOG00000049452, ENSRNOG00000004498, ENSRNOG00000034258, ENSRNOG00000018350, ENSRNOG00000059801, ENSRNOG00000002959, ENSRNOG00000050994, ENSRNOG00000011044, ENSRNOG00000001627, ENSRNOG00000018991, ENSRNOG00000006003, ENSRNOG00000001195, ENSRNOG00000011619, ENSRNOG00000027520
CC	GO:0042587	glycogen granule	3	0.0287532	0.232207	ENSRNOG00000045636, ENSRNOG00000018494, ENSRNOG00000011474
CC	GO:0030054	cell junction	14	0.0288873	0.232207	ENSRNOG00000056701, ENSRNOG00000004332, ENSRNOG00000004498, ENSRNOG00000005933, ENSRNOG00000006966, ENSRNOG00000011016, ENSRNOG00000034258, ENSRNOG00000050994, ENSRNOG00000015880, ENSRNOG00000017673, ENSRNOG00000014961, ENSRNOG00000017637, ENSRNOG00000002191, ENSRNOG00000045895
MF	GO:0000978	RNA polymerase II core promoter proximal region sequence-specific DNA binding	49	0.0290937	0.49992	ENSRNOG00000027595, ENSRNOG00000056716, ENSRNOG00000003544, ENSRNOG00000003745, ENSRNOG00000002414, ENSRNOG00000005964, ENSRNOG00000009329, ENSRNOG00000055340, ENSRNOG00000012499, ENSRNOG00000037799, ENSRNOG00000046912, ENSRNOG00000016102, ENSRNOG00000023679, ENSRNOG00000011879, ENSRNOG00000008622, ENSRNOG00000006649, ENSRNOG00000006966, ENSRNOG00000013017, ENSRNOG00000010188, ENSRNOG00000019383,…
BP	GO:0046889	positive regulation of lipid biosynthetic process	4	0.0292706	0.469247	ENSRNOG00000049232, ENSRNOG00000056716, ENSRNOG00000015658, ENSRNOG00000018454
BP	GO:0048546	digestive tract morphogenesis	4	0.0292706	0.469247	ENSRNOG00000008292, ENSRNOG00000009848, ENSRNOG00000004332, ENSRNOG00000014940
BP	GO:0042445	hormone metabolic process	4	0.0292706	0.469247	ENSRNOG00000018445, ENSRNOG00000015654, ENSRNOG00000013994, ENSRNOG00000011068
CC	GO:0005912	adherens junction	11	0.0293421	0.232207	ENSRNOG00000002176, ENSRNOG00000010903, ENSRNOG00000002024, ENSRNOG00000007764, ENSRNOG00000015658, ENSRNOG00000016419, ENSRNOG00000019598, ENSRNOG00000006003, ENSRNOG00000002959, ENSRNOG00000050794, ENSRNOG00000001195
BP	GO:0008306	associative learning	6	0.0294546	0.469247	ENSRNOG00000006997, ENSRNOG00000008428, ENSRNOG00000018445, ENSRNOG00000023601, ENSRNOG00000017673, ENSRNOG00000007089
BP	GO:0051930	regulation of sensory perception of pain	6	0.0294546	0.469247	ENSRNOG00000010997, ENSRNOG00000031890, ENSRNOG00000016050, ENSRNOG00000028708, ENSRNOG00000021157, ENSRNOG00000032884
BP	GO:0048813	dendrite morphogenesis	6	0.0294546	0.469247	ENSRNOG00000023601, ENSRNOG00000004688, ENSRNOG00000023337, ENSRNOG00000032922, ENSRNOG00000011203, ENSRNOG00000006003
MF	GO:0043184	vascular endothelial growth factor receptor 2 binding	3	0.0294778	0.49992	ENSRNOG00000004057, ENSRNOG00000026053, ENSRNOG00000019598
MF	GO:2001069	glycogen binding	3	0.0294778	0.49992	ENSRNOG00000018494, ENSRNOG00000011474, ENSRNOG00000040242
MF	GO:0035727	lysophosphatidic acid binding	3	0.0294778	0.49992	ENSRNOG00000013656, ENSRNOG00000002428, ENSRNOG00000001528
BP	GO:0006898	receptor-mediated endocytosis	7	0.0301493	0.478122	ENSRNOG00000033835, ENSRNOG00000028930, ENSRNOG00000004332, ENSRNOG00000012779, ENSRNOG00000018251, ENSRNOG00000018454, ENSRNOG00000050994
MF	GO:0001540	beta-amyloid binding	7	0.0307804	0.50191	ENSRNOG00000012779, ENSRNOG00000005195, ENSRNOG00000043085, ENSRNOG00000016460, ENSRNOG00000058111, ENSRNOG00000018454, ENSRNOG00000016398
MF	GO:0070064	proline-rich region binding	4	0.0308032	0.50191	ENSRNOG00000005933, ENSRNOG00000020918, ENSRNOG00000011752, ENSRNOG00000050994
BP	GO:0007189	adenylate cyclase-activating G-protein coupled receptor signaling pathway	10	0.031379	0.495361	ENSRNOG00000006997, ENSRNOG00000030149, ENSRNOG00000017568, ENSRNOG00000004900, ENSRNOG00000025889, ENSRNOG00000013656, ENSRNOG00000022256, ENSRNOG00000032472, ENSRNOG00000011411, ENSRNOG00000003999
BP	GO:0090263	positive regulation of canonical Wnt signaling pathway	9	0.0315501	0.495807	ENSRNOG00000004332, ENSRNOG00000005933, ENSRNOG00000014863, ENSRNOG00000011977, ENSRNOG00000056836, ENSRNOG00000011568, ENSRNOG00000017392, ENSRNOG00000005715, ENSRNOG00000006052
BP	GO:0060337	type I interferon signaling pathway	4	0.0333053	0.504025	ENSRNOG00000017414, ENSRNOG00000049282, ENSRNOG00000001369, ENSRNOG00000009263
BP	GO:0006809	nitric oxide biosynthetic process	4	0.0333053	0.504025	ENSRNOG00000027145, ENSRNOG00000056836, ENSRNOG00000046261, ENSRNOG00000011016
BP	GO:0032332	positive regulation of chondrocyte differentiation	4	0.0333053	0.504025	ENSRNOG00000006649, ENSRNOG00000016758, ENSRNOG00000027869, ENSRNOG00000048389
BP	GO:0005978	glycogen biosynthetic process	4	0.0333053	0.504025	ENSRNOG00000009329, ENSRNOG00000008079, ENSRNOG00000018494, ENSRNOG00000040242
BP	GO:0002042	cell migration involved in sprouting angiogenesis	4	0.0333053	0.504025	ENSRNOG00000026053, ENSRNOG00000017392, ENSRNOG00000019598, ENSRNOG00000014481
BP	GO:0090050	positive regulation of cell migration involved in sprouting angiogenesis	5	0.0333791	0.504025	ENSRNOG00000014117, ENSRNOG00000020479, ENSRNOG00000017392, ENSRNOG00000003715, ENSRNOG00000019598
BP	GO:0001958	endochondral ossification	5	0.0333791	0.504025	ENSRNOG00000013994, ENSRNOG00000025889, ENSRNOG00000008478, ENSRNOG00000005708, ENSRNOG00000048389
BP	GO:0035904	aorta development	5	0.0333791	0.504025	ENSRNOG00000009173, ENSRNOG00000002146, ENSRNOG00000013994, ENSRNOG00000014426, ENSRNOG00000012655
BP	GO:0006836	neurotransmitter transport	5	0.0333791	0.504025	ENSRNOG00000022946, ENSRNOG00000005697, ENSRNOG00000027468, ENSRNOG00000019752, ENSRNOG00000002051
CC	GO:0005923	bicellular tight junction	10	0.0339562	0.264167	ENSRNOG00000054080, ENSRNOG00000007764, ENSRNOG00000016291, ENSRNOG00000019181, ENSRNOG00000006384, ENSRNOG00000020918, ENSRNOG00000056550, ENSRNOG00000008487, ENSRNOG00000007894, ENSRNOG00000007036
BP	GO:0043278	response to morphine	6	0.0340633	0.512129	ENSRNOG00000008428, ENSRNOG00000014574, ENSRNOG00000015654, ENSRNOG00000028404, ENSRNOG00000011107, ENSRNOG00000008943
BP	GO:0035725	sodium ion transmembrane transport	9	0.0346499	0.518702	ENSRNOG00000005687, ENSRNOG00000018525, ENSRNOG00000002146, ENSRNOG00000005697, ENSRNOG00000008479, ENSRNOG00000019937, ENSRNOG00000055382, ENSRNOG00000032884, ENSRNOG00000027468
MF	GO:0005546	phosphatidylinositol-4,5-bisphosphate binding	8	0.0355058	0.567409	ENSRNOG00000017500, ENSRNOG00000008170, ENSRNOG00000028930, ENSRNOG00000004498, ENSRNOG00000055382, ENSRNOG00000004810, ENSRNOG00000004198, ENSRNOG00000018991
CC	GO:0031982	vesicle	12	0.0355349	0.271842	ENSRNOG00000002158, ENSRNOG00000005093, ENSRNOG00000004900, ENSRNOG00000020479, ENSRNOG00000005195, ENSRNOG00000043451, ENSRNOG00000012840, ENSRNOG00000007284, ENSRNOG00000053384, ENSRNOG00000019598, ENSRNOG00000004077, ENSRNOG00000002381
BP	GO:0060392	negative regulation of SMAD protein import into nucleus	3	0.0357058	0.523233	ENSRNOG00000029911, ENSRNOG00000017987, ENSRNOG00000008697
BP	GO:0006084	acetyl-CoA metabolic process	3	0.0357058	0.523233	ENSRNOG00000045636, ENSRNOG00000016552, ENSRNOG00000034013
BP	GO:0010756	positive regulation of plasminogen activation	3	0.0357058	0.523233	ENSRNOG00000023226, ENSRNOG00000004540, ENSRNOG00000001739
BP	GO:0050650	chondroitin sulfate proteoglycan biosynthetic process	3	0.0357058	0.523233	ENSRNOG00000056658, ENSRNOG00000028108, ENSRNOG00000014713
BP	GO:0038007	netrin-activated signaling pathway	3	0.0357058	0.523233	ENSRNOG00000029071, ENSRNOG00000018350, ENSRNOG00000033099
BP	GO:0005977	glycogen metabolic process	5	0.0364495	0.529662	ENSRNOG00000049232, ENSRNOG00000008079, ENSRNOG00000018494, ENSRNOG00000011474, ENSRNOG00000040242
BP	GO:0048701	embryonic cranial skeleton morphogenesis	5	0.0364495	0.529662	ENSRNOG00000003720, ENSRNOG00000025889, ENSRNOG00000019565, ENSRNOG00000007036, ENSRNOG00000005708
BP	GO:0010033	response to organic substance	12	0.0366422	0.530243	ENSRNOG00000038483, ENSRNOG00000012749, ENSRNOG00000010997, ENSRNOG00000001312, ENSRNOG00000004303, ENSRNOG00000020918, ENSRNOG00000008332, ENSRNOG00000043451, ENSRNOG00000048315, ENSRNOG00000005695, ENSRNOG00000016552, ENSRNOG00000052564
CC	GO:0005783	endoplasmic reticulum	50	0.0366759	0.272626	ENSRNOG00000056836, ENSRNOG00000001369, ENSRNOG00000016460, ENSRNOG00000050655, ENSRNOG00000011441, ENSRNOG00000013991, ENSRNOG00000013552, ENSRNOG00000017118, ENSRNOG00000023116, ENSRNOG00000043085, ENSRNOG00000006052, ENSRNOG00000002093, ENSRNOG00000024089, ENSRNOG00000002174, ENSRNOG00000006645, ENSRNOG00000002407, ENSRNOG00000001912, ENSRNOG00000004307, ENSRNOG00000005958, ENSRNOG00000013213,…
BP	GO:0001934	positive regulation of protein phosphorylation	16	0.0368146	0.530527	ENSRNOG00000006997, ENSRNOG00000004332, ENSRNOG00000028930, ENSRNOG00000008816, ENSRNOG00000010997, ENSRNOG00000011789, ENSRNOG00000005854, ENSRNOG00000020918, ENSRNOG00000017392, ENSRNOG00000030210, ENSRNOG00000019598, ENSRNOG00000014481, ENSRNOG00000020369, ENSRNOG00000025889, ENSRNOG00000001195, ENSRNOG00000048389
CC	GO:0098794	postsynapse	12	0.0368252	0.272626	ENSRNOG00000006997, ENSRNOG00000056558, ENSRNOG00000012749, ENSRNOG00000012804, ENSRNOG00000008479, ENSRNOG00000007518, ENSRNOG00000028404, ENSRNOG00000004810, ENSRNOG00000019752, ENSRNOG00000002051, ENSRNOG00000047014, ENSRNOG00000012807
MF	GO:0008483	transaminase activity	3	0.0370387	0.580739	ENSRNOG00000042533, ENSRNOG00000004443, ENSRNOG00000045743
BP	GO:0002063	chondrocyte development	4	0.0376131	0.533185	ENSRNOG00000021166, ENSRNOG00000012499, ENSRNOG00000006052, ENSRNOG00000048389
BP	GO:0048148	behavioral response to cocaine	4	0.0376131	0.533185	ENSRNOG00000008428, ENSRNOG00000028404, ENSRNOG00000004900, ENSRNOG00000047014
BP	GO:0042310	vasoconstriction	4	0.0376131	0.533185	ENSRNOG00000018445, ENSRNOG00000010997, ENSRNOG00000056836, ENSRNOG00000009390
BP	GO:0006956	complement activation	4	0.0376131	0.533185	ENSRNOG00000030715, ENSRNOG00000024115, ENSRNOG00000051235
BP	GO:0007160	cell-matrix adhesion	8	0.0378264	0.534028	ENSRNOG00000014288, ENSRNOG00000018445, ENSRNOG00000023548, ENSRNOG00000046639, ENSRNOG00000004516, ENSRNOG00000058111, ENSRNOG00000004912, ENSRNOG00000043167
BP	GO:0048839	inner ear development	7	0.0382669	0.53806	ENSRNOG00000016872, ENSRNOG00000012749, ENSRNOG00000015357, ENSRNOG00000038891, ENSRNOG00000001312, ENSRNOG00000028108, ENSRNOG00000012840
MF	GO:0004879	RNA polymerase II transcription factor activity, ligand-activated sequence-specific DNA binding	6	0.0392545	0.597472	ENSRNOG00000027145, ENSRNOG00000046912, ENSRNOG00000006649, ENSRNOG00000005964, ENSRNOG00000009329, ENSRNOG00000012499
MF	GO:0043395	heparan sulfate proteoglycan binding	4	0.0395439	0.597472	ENSRNOG00000006997, ENSRNOG00000011977, ENSRNOG00000030715, ENSRNOG00000018454
BP	GO:0060349	bone morphogenesis	5	0.0396773	0.555642	ENSRNOG00000046261, ENSRNOG00000055340, ENSRNOG00000012499, ENSRNOG00000008478, ENSRNOG00000042860
BP	GO:0042472	inner ear morphogenesis	7	0.0404934	0.562535	ENSRNOG00000013573, ENSRNOG00000007765, ENSRNOG00000003720, ENSRNOG00000005964, ENSRNOG00000056915, ENSRNOG00000016050, ENSRNOG00000000316
BP	GO:0032922	circadian regulation of gene expression	7	0.0404934	0.562535	ENSRNOG00000027145, ENSRNOG00000008428, ENSRNOG00000018413, ENSRNOG00000009329, ENSRNOG00000005715, ENSRNOG00000007152, ENSRNOG00000048961
MF	GO:0008017	microtubule binding	16	0.0405144	0.601204	ENSRNOG00000033835, ENSRNOG00000011826, ENSRNOG00000004057, ENSRNOG00000028624, ENSRNOG00000012207, ENSRNOG00000001963, ENSRNOG00000003613, ENSRNOG00000014087, ENSRNOG00000052157, ENSRNOG00000001959, ENSRNOG00000017428, ENSRNOG00000014844, ENSRNOG00000043143, ENSRNOG00000028261, ENSRNOG00000027831, ENSRNOG00000001195
BP	GO:0035556	intracellular signal transduction	22	0.041124	0.569019	ENSRNOG00000027002, ENSRNOG00000008428, ENSRNOG00000029535, ENSRNOG00000004332, ENSRNOG00000028404, ENSRNOG00000010588, ENSRNOG00000004810, ENSRNOG00000032922, ENSRNOG00000003999, ENSRNOG00000014182, ENSRNOG00000056343, ENSRNOG00000012862, ENSRNOG00000012563, ENSRNOG00000017673, ENSRNOG00000017568, ENSRNOG00000026705, ENSRNOG00000014117, ENSRNOG00000002093, ENSRNOG00000004165, ENSRNOG00000007894,…
BP	GO:0007626	locomotory behavior	9	0.0414538	0.570146	ENSRNOG00000006997, ENSRNOG00000004642, ENSRNOG00000008428, ENSRNOG00000028404, ENSRNOG00000004438, ENSRNOG00000023601, ENSRNOG00000008943, ENSRNOG00000000316, ENSRNOG00000053086
BP	GO:0001942	hair follicle development	6	0.0417718	0.570146	ENSRNOG00000004332, ENSRNOG00000001312, ENSRNOG00000024998, ENSRNOG00000008332, ENSRNOG00000005715, ENSRNOG00000025332
BP	GO:0048010	vascular endothelial growth factor receptor signaling pathway	4	0.0421905	0.570146	ENSRNOG00000007159, ENSRNOG00000019598, ENSRNOG00000004165, ENSRNOG00000048389
BP	GO:0048593	camera-type eye morphogenesis	4	0.0421905	0.570146	ENSRNOG00000008292, ENSRNOG00000055340, ENSRNOG00000053384, ENSRNOG00000019598
BP	GO:0032026	response to magnesium ion	4	0.0421905	0.570146	ENSRNOG00000013994, ENSRNOG00000008336, ENSRNOG00000020918, ENSRNOG00000004077
BP	GO:0007413	axonal fasciculation	4	0.0421905	0.570146	ENSRNOG00000011977, ENSRNOG00000002126, ENSRNOG00000023337, ENSRNOG00000031890
BP	GO:0008542	visual learning	7	0.0428003	0.574102	ENSRNOG00000006997, ENSRNOG00000004730, ENSRNOG00000008428, ENSRNOG00000008292, ENSRNOG00000028404, ENSRNOG00000004900, ENSRNOG00000019181
CC	GO:0034364	high-density lipoprotein particle	4	0.0428875	0.312466	ENSRNOG00000006997, ENSRNOG00000016488, ENSRNOG00000025691, ENSRNOG00000018454
BP	GO:0036120	cellular response to platelet-derived growth factor stimulus	5	0.0430626	0.574102	ENSRNOG00000017500, ENSRNOG00000014288, ENSRNOG00000007159, ENSRNOG00000010994, ENSRNOG00000001414
BP	GO:0071773	cellular response to BMP stimulus	5	0.0430626	0.574102	ENSRNOG00000014288, ENSRNOG00000014686, ENSRNOG00000052469, ENSRNOG00000053384, ENSRNOG00000005033
BP	GO:0000904	cell morphogenesis involved in differentiation	3	0.0436404	0.574102	ENSRNOG00000059507, ENSRNOG00000028930, ENSRNOG00000013994
BP	GO:0003143	embryonic heart tube morphogenesis	3	0.0436404	0.574102	ENSRNOG00000015488, ENSRNOG00000005933, ENSRNOG00000005033
BP	GO:0006957	complement activation, alternative pathway	3	0.0436404	0.574102	ENSRNOG00000030715, ENSRNOG00000051235
BP	GO:0021930	cerebellar granule cell precursor proliferation	3	0.0436404	0.574102	ENSRNOG00000027145, ENSRNOG00000020060, ENSRNOG00000017392
BP	GO:0007162	negative regulation of cell adhesion	6	0.0445564	0.583941	ENSRNOG00000002024, ENSRNOG00000011977, ENSRNOG00000046261, ENSRNOG00000005854, ENSRNOG00000042848, ENSRNOG00000013213
BP	GO:0071347	cellular response to interleukin-1	9	0.0451662	0.589708	ENSRNOG00000027145, ENSRNOG00000008292, ENSRNOG00000014288, ENSRNOG00000007159, ENSRNOG00000029768, ENSRNOG00000009329, ENSRNOG00000001414, ENSRNOG00000000239, ENSRNOG00000018454
MF	GO:0001730	2'-5'-oligoadenylate synthetase activity	3	0.0452494	0.659689	ENSRNOG00000049282, ENSRNOG00000028814, ENSRNOG00000001369
BP	GO:0030522	intracellular receptor signaling pathway	5	0.0466054	0.598339	ENSRNOG00000027145, ENSRNOG00000046912, ENSRNOG00000006649, ENSRNOG00000005964, ENSRNOG00000009329
BP	GO:0001707	mesoderm formation	5	0.0466054	0.598339	ENSRNOG00000013340, ENSRNOG00000005964, ENSRNOG00000052469, ENSRNOG00000053384, ENSRNOG00000005033
BP	GO:0002021	response to dietary excess	4	0.0470333	0.598339	ENSRNOG00000013994, ENSRNOG00000030715, ENSRNOG00000018454, ENSRNOG00000004917
BP	GO:0010001	glial cell differentiation	4	0.0470333	0.598339	ENSRNOG00000010903, ENSRNOG00000009795, ENSRNOG00000017392, ENSRNOG00000001528
BP	GO:0032331	negative regulation of chondrocyte differentiation	4	0.0470333	0.598339	ENSRNOG00000003553, ENSRNOG00000026053, ENSRNOG00000012499, ENSRNOG00000007036
BP	GO:0071404	cellular response to low-density lipoprotein particle stimulus	4	0.0470333	0.598339	ENSRNOG00000002265, ENSRNOG00000019556, ENSRNOG00000001414, ENSRNOG00000016552
BP	GO:0046849	bone remodeling	4	0.0470333	0.598339	ENSRNOG00000013994, ENSRNOG00000011944, ENSRNOG00000008658, ENSRNOG00000005715
BP	GO:0070098	chemokine-mediated signaling pathway	6	0.0474495	0.598797	ENSRNOG00000019622, ENSRNOG00000007159, ENSRNOG00000029768, ENSRNOG00000022256, ENSRNOG00000000239, ENSRNOG00000001162
BP	GO:0007265	Ras protein signal transduction	7	0.0476571	0.598797	ENSRNOG00000014276, ENSRNOG00000017568, ENSRNOG00000010219, ENSRNOG00000026705, ENSRNOG00000018659, ENSRNOG00000018350, ENSRNOG00000004165
BP	GO:0043066	negative regulation of apoptotic process	29	0.0479642	0.598797	ENSRNOG00000004332, ENSRNOG00000020060, ENSRNOG00000007545, ENSRNOG00000010997, ENSRNOG00000005964, ENSRNOG00000008658, ENSRNOG00000016182, ENSRNOG00000016460, ENSRNOG00000012499, ENSRNOG00000028708, ENSRNOG00000019598, ENSRNOG00000020716, ENSRNOG00000022839, ENSRNOG00000018268, ENSRNOG00000008292, ENSRNOG00000014288, ENSRNOG00000014961, ENSRNOG00000008376, ENSRNOG00000008332, ENSRNOG00000048315,…
BP	GO:0031175	neuron projection development	12	0.0480404	0.598797	ENSRNOG00000006997, ENSRNOG00000026573, ENSRNOG00000015596, ENSRNOG00000053334, ENSRNOG00000017438, ENSRNOG00000004438, ENSRNOG00000009390, ENSRNOG00000031890, ENSRNOG00000016050, ENSRNOG00000018454, ENSRNOG00000011044, ENSRNOG00000008298
BP	GO:0010467	gene expression	12	0.0480404	0.598797	ENSRNOG00000010903, ENSRNOG00000010997, ENSRNOG00000013994, ENSRNOG00000004438, ENSRNOG00000005519, ENSRNOG00000006384, ENSRNOG00000054508, ENSRNOG00000010960, ENSRNOG00000016050, ENSRNOG00000030715, ENSRNOG00000018454, ENSRNOG00000004917
BP	GO:0033138	positive regulation of peptidyl-serine phosphorylation	8	0.0481038	0.598797	ENSRNOG00000006997, ENSRNOG00000018445, ENSRNOG00000004332, ENSRNOG00000056836, ENSRNOG00000005854, ENSRNOG00000019598, ENSRNOG00000004165, ENSRNOG00000008298
CC	GO:0097060	synaptic membrane	6	0.0485677	0.344299	ENSRNOG00000014574, ENSRNOG00000013141, ENSRNOG00000026705, ENSRNOG00000019937, ENSRNOG00000003715, ENSRNOG00000002051
CC	GO:0015630	microtubule cytoskeleton	14	0.048757	0.344299	ENSRNOG00000033835, ENSRNOG00000002146, ENSRNOG00000012207, ENSRNOG00000001963, ENSRNOG00000003613, ENSRNOG00000018371, ENSRNOG00000038921, ENSRNOG00000018350, ENSRNOG00000006804, ENSRNOG00000014087, ENSRNOG00000001959, ENSRNOG00000043143, ENSRNOG00000027831, ENSRNOG00000002571
MF	GO:0046872	metal ion binding	70	0.0488691	0.695786	ENSRNOG00000008479, ENSRNOG00000029658, ENSRNOG00000001369, ENSRNOG00000012655, ENSRNOG00000000875, ENSRNOG00000000316, ENSRNOG00000019577, ENSRNOG00000016102, ENSRNOG00000013552, ENSRNOG00000014686, ENSRNOG00000013994, ENSRNOG00000026705, ENSRNOG00000017637, ENSRNOG00000023679, ENSRNOG00000046639, ENSRNOG00000009715, ENSRNOG00000049452, ENSRNOG00000009514, ENSRNOG00000046261, ENSRNOG00000004589,…
MF	GO:0005540	hyaluronic acid binding	4	0.0494	0.695786	ENSRNOG00000050792, ENSRNOG00000018434, ENSRNOG00000026951, ENSRNOG00000029212
CC	GO:0099056	integral component of presynaptic membrane	8	0.0495229	0.344409	ENSRNOG00000003365, ENSRNOG00000008428, ENSRNOG00000018778, ENSRNOG00000005697, ENSRNOG00000005519, ENSRNOG00000031890, ENSRNOG00000013213, ENSRNOG00000032884
BP	GO:0001701	in utero embryonic development	19	0.049713	0.616618	ENSRNOG00000028368, ENSRNOG00000049232, ENSRNOG00000028930, ENSRNOG00000007518, ENSRNOG00000005854, ENSRNOG00000016050, ENSRNOG00000013017, ENSRNOG00000052469, ENSRNOG00000019598, ENSRNOG00000014872, ENSRNOG00000023309, ENSRNOG00000020369, ENSRNOG00000027869, ENSRNOG00000008332, ENSRNOG00000002093, ENSRNOG00000024115, ENSRNOG00000007036, ENSRNOG00000060550, ENSRNOG00000005033

## Sheet: 7d down GO
Table S7. Gene Ontology analysis of down-regulated genes in the Dex 7d group. Terms with p values smaller than 0.05 were regarded as statistically significant enriched. Statistical test method: hypergeometric test / Fisher's exact test. FDR correction method: Benjamini and Hochberg.
Ontology	ID	Term	Input number	p value	Corrected p Value	Genes
BP	GO:0050853	B cell receptor signaling pathway	25	3.16983e-16	1.09961e-12	ENSRNOG00000025990, ENSRNOG00000009705, ENSRNOG00000002278, ENSRNOG00000003069, ENSRNOG00000036829, ENSRNOG00000010798, ENSRNOG00000000655, ENSRNOG00000051986, ENSRNOG00000055169, ENSRNOG00000058590, ENSRNOG00000020945, ENSRNOG00000020125, ENSRNOG00000052407, ENSRNOG00000011917, ENSRNOG00000050000, ENSRNOG00000049870, ENSRNOG00000014294, ENSRNOG00000018311, ENSRNOG00000012160, ENSRNOG00000001908,…
BP	GO:0030183	B cell differentiation	22	4.70055e-12	8.1531e-09	ENSRNOG00000004444, ENSRNOG00000054764, ENSRNOG00000006048, ENSRNOG00000007049, ENSRNOG00000004630, ENSRNOG00000055858, ENSRNOG00000003954, ENSRNOG00000004623, ENSRNOG00000034025, ENSRNOG00000000655, ENSRNOG00000051986, ENSRNOG00000034164, ENSRNOG00000016595, ENSRNOG00000020945, ENSRNOG00000015796, ENSRNOG00000012160, ENSRNOG00000020125, ENSRNOG00000034190, ENSRNOG00000018669, ENSRNOG00000013647,…
CC	GO:0009897	external side of plasma membrane	53	6.07161e-11	3.30296e-08	ENSRNOG00000030246, ENSRNOG00000003866, ENSRNOG00000034164, ENSRNOG00000015773, ENSRNOG00000038286, ENSRNOG00000020884, ENSRNOG00000020125, ENSRNOG00000007664, ENSRNOG00000024000, ENSRNOG00000011917, ENSRNOG00000054764, ENSRNOG00000050000, ENSRNOG00000022071, ENSRNOG00000000187, ENSRNOG00000059538, ENSRNOG00000006604, ENSRNOG00000010665, ENSRNOG00000005954, ENSRNOG00000010584, ENSRNOG00000052348,…
BP	GO:0002250	adaptive immune response	23	5.51231e-10	6.37407e-07	ENSRNOG00000032844, ENSRNOG00000002278, ENSRNOG00000030246, ENSRNOG00000004630, ENSRNOG00000033215, ENSRNOG00000003666, ENSRNOG00000000454, ENSRNOG00000019374, ENSRNOG00000012378, ENSRNOG00000030431, ENSRNOG00000015994, ENSRNOG00000012160, ENSRNOG00000016434, ENSRNOG00000012061, ENSRNOG00000020125, ENSRNOG00000027839, ENSRNOG00000018669, ENSRNOG00000021546, ENSRNOG00000008180, ENSRNOG00000015945,…
CC	GO:0005737	cytoplasm	300	6.42827e-10	1.74849e-07	ENSRNOG00000002014, ENSRNOG00000001167, ENSRNOG00000000994, ENSRNOG00000058739, ENSRNOG00000003469, ENSRNOG00000000632, ENSRNOG00000054371, ENSRNOG00000019374, ENSRNOG00000000636, ENSRNOG00000017751, ENSRNOG00000008919, ENSRNOG00000053047, ENSRNOG00000000519, ENSRNOG00000059140, ENSRNOG00000012051, ENSRNOG00000025938, ENSRNOG00000019813, ENSRNOG00000052070, ENSRNOG00000026226, ENSRNOG00000013836,…
BP	GO:0035556	intracellular signal transduction	46	1.17006e-09	1.01474e-06	ENSRNOG00000009705, ENSRNOG00000002278, ENSRNOG00000007925, ENSRNOG00000019093, ENSRNOG00000052391, ENSRNOG00000003469, ENSRNOG00000054371, ENSRNOG00000051986, ENSRNOG00000017671, ENSRNOG00000050430, ENSRNOG00000000519, ENSRNOG00000013220, ENSRNOG00000042411, ENSRNOG00000020505, ENSRNOG00000013598, ENSRNOG00000017737, ENSRNOG00000023238, ENSRNOG00000018669, ENSRNOG00000022943, ENSRNOG00000052407,…
CC	GO:0005654	nucleoplasm	184	4.90081e-09	8.8868e-07	ENSRNOG00000054017, ENSRNOG00000002014, ENSRNOG00000001167, ENSRNOG00000010557, ENSRNOG00000009722, ENSRNOG00000031778, ENSRNOG00000011523, ENSRNOG00000000632, ENSRNOG00000002417, ENSRNOG00000003748, ENSRNOG00000002538, ENSRNOG00000002659, ENSRNOG00000053047, ENSRNOG00000024729, ENSRNOG00000059140, ENSRNOG00000019413, ENSRNOG00000012051, ENSRNOG00000025938, ENSRNOG00000034240, ENSRNOG00000061070,…
MF	GO:0004715	non-membrane spanning protein tyrosine kinase activity	14	7.32243e-09	6.56822e-06	ENSRNOG00000009705, ENSRNOG00000056714, ENSRNOG00000002278, ENSRNOG00000009912, ENSRNOG00000010798, ENSRNOG00000019374, ENSRNOG00000012160, ENSRNOG00000013598, ENSRNOG00000027839, ENSRNOG00000018669, ENSRNOG00000008180, ENSRNOG00000052407, ENSRNOG00000032948, ENSRNOG00000009331
CC	GO:0001772	immunological synapse	14	1.29304e-08	1.75854e-06	ENSRNOG00000002540, ENSRNOG00000032844, ENSRNOG00000009705, ENSRNOG00000033215, ENSRNOG00000037409, ENSRNOG00000034025, ENSRNOG00000019430, ENSRNOG00000017980, ENSRNOG00000018524, ENSRNOG00000017874, ENSRNOG00000020884, ENSRNOG00000020699, ENSRNOG00000008153, ENSRNOG00000024452
BP	GO:0042113	B cell activation	12	2.68021e-08	1.85953e-05	ENSRNOG00000020945, ENSRNOG00000032247, ENSRNOG00000012061, ENSRNOG00000020125, ENSRNOG00000016846, ENSRNOG00000017181, ENSRNOG00000005404, ENSRNOG00000021510, ENSRNOG00000013967, ENSRNOG00000034230, ENSRNOG00000034164, ENSRNOG00000024000
BP	GO:0050860	negative regulation of T cell receptor signaling pathway	11	5.10357e-08	2.95071e-05	ENSRNOG00000018524, ENSRNOG00000019614, ENSRNOG00000001167, ENSRNOG00000006604, ENSRNOG00000017737, ENSRNOG00000020337, ENSRNOG00000034025, ENSRNOG00000011762, ENSRNOG00000014294, ENSRNOG00000028541, ENSRNOG00000011054
MF	GO:0005524	ATP binding	99	5.91548e-08	2.65309e-05	ENSRNOG00000006732, ENSRNOG00000005883, ENSRNOG00000009722, ENSRNOG00000012735, ENSRNOG00000003469, ENSRNOG00000010798, ENSRNOG00000000632, ENSRNOG00000019374, ENSRNOG00000054371, ENSRNOG00000002659, ENSRNOG00000053047, ENSRNOG00000000519, ENSRNOG00000059140, ENSRNOG00000014367, ENSRNOG00000027839, ENSRNOG00000023238, ENSRNOG00000017912, ENSRNOG00000022943, ENSRNOG00000004392, ENSRNOG00000008471,…
BP	GO:0006468	protein phosphorylation	51	1.03395e-07	5.12397e-05	ENSRNOG00000005883, ENSRNOG00000058938, ENSRNOG00000003469, ENSRNOG00000000632, ENSRNOG00000019374, ENSRNOG00000007906, ENSRNOG00000000519, ENSRNOG00000020647, ENSRNOG00000013598, ENSRNOG00000027839, ENSRNOG00000004392, ENSRNOG00000043201, ENSRNOG00000054764, ENSRNOG00000007931, ENSRNOG00000000583, ENSRNOG00000000187, ENSRNOG00000021061, ENSRNOG00000036711, ENSRNOG00000013177, ENSRNOG00000057072,…
MF	GO:0001784	phosphotyrosine binding	13	1.31696e-07	3.93771e-05	ENSRNOG00000030930, ENSRNOG00000009705, ENSRNOG00000002014, ENSRNOG00000002599, ENSRNOG00000009912, ENSRNOG00000051986, ENSRNOG00000054560, ENSRNOG00000014294, ENSRNOG00000050430, ENSRNOG00000012160, ENSRNOG00000008444, ENSRNOG00000007422, ENSRNOG00000009331
MF	GO:0003682	chromatin binding	50	2.083e-07	4.67112e-05	ENSRNOG00000009722, ENSRNOG00000039859, ENSRNOG00000011523, ENSRNOG00000000632, ENSRNOG00000002217, ENSRNOG00000017674, ENSRNOG00000053047, ENSRNOG00000012051, ENSRNOG00000051615, ENSRNOG00000014723, ENSRNOG00000003581, ENSRNOG00000010708, ENSRNOG00000026110, ENSRNOG00000010625, ENSRNOG00000008904, ENSRNOG00000032995, ENSRNOG00000006048, ENSRNOG00000004623, ENSRNOG00000037449, ENSRNOG00000020804,…
BP	GO:0042742	defense response to bacterium	25	5.47577e-07	0.000237443	ENSRNOG00000025990, ENSRNOG00000002217, ENSRNOG00000028707, ENSRNOG00000005825, ENSRNOG00000033693, ENSRNOG00000055169, ENSRNOG00000058590, ENSRNOG00000008310, ENSRNOG00000008394, ENSRNOG00000006695, ENSRNOG00000007558, ENSRNOG00000050000, ENSRNOG00000049870, ENSRNOG00000004623, ENSRNOG00000033685, ENSRNOG00000036711, ENSRNOG00000008707, ENSRNOG00000034195, ENSRNOG00000012160, ENSRNOG00000014312,…
BP	GO:0019886	antigen processing and presentation of exogenous peptide antigen via MHC class II	9	8.95895e-07	0.000345318	ENSRNOG00000032844, ENSRNOG00000033215, ENSRNOG00000000454, ENSRNOG00000018735, ENSRNOG00000017703, ENSRNOG00000004639, ENSRNOG00000046452, ENSRNOG00000030431, ENSRNOG00000026762
BP	GO:0046777	protein autophosphorylation	25	1.18415e-06	0.0003888	ENSRNOG00000009705, ENSRNOG00000057702, ENSRNOG00000004217, ENSRNOG00000011589, ENSRNOG00000054371, ENSRNOG00000000655, ENSRNOG00000019374, ENSRNOG00000020505, ENSRNOG00000013598, ENSRNOG00000052407, ENSRNOG00000004392, ENSRNOG00000054764, ENSRNOG00000006604, ENSRNOG00000009912, ENSRNOG00000001138, ENSRNOG00000004726, ENSRNOG00000000529, ENSRNOG00000013177, ENSRNOG00000012160, ENSRNOG00000016434,…
BP	GO:0018108	peptidyl-tyrosine phosphorylation	21	1.33847e-06	0.0003888	ENSRNOG00000054764, ENSRNOG00000009705, ENSRNOG00000002278, ENSRNOG00000057702, ENSRNOG00000000321, ENSRNOG00000009912, ENSRNOG00000010798, ENSRNOG00000000655, ENSRNOG00000019374, ENSRNOG00000014294, ENSRNOG00000012160, ENSRNOG00000014367, ENSRNOG00000013598, ENSRNOG00000027839, ENSRNOG00000007270, ENSRNOG00000018416, ENSRNOG00000018669, ENSRNOG00000008180, ENSRNOG00000052407, ENSRNOG00000004392,…
BP	GO:0042098	T cell proliferation	14	1.40164e-06	0.0003888	ENSRNOG00000003866, ENSRNOG00000017181, ENSRNOG00000006932, ENSRNOG00000005404, ENSRNOG00000000655, ENSRNOG00000019430, ENSRNOG00000004409, ENSRNOG00000050258, ENSRNOG00000016041, ENSRNOG00000036711, ENSRNOG00000014294, ENSRNOG00000020699, ENSRNOG00000026039, ENSRNOG00000007664
BP	GO:0050852	T cell receptor signaling pathway	17	1.45702e-06	0.0003888	ENSRNOG00000033912, ENSRNOG00000002278, ENSRNOG00000033215, ENSRNOG00000006604, ENSRNOG00000017181, ENSRNOG00000004639, ENSRNOG00000000655, ENSRNOG00000051986, ENSRNOG00000036711, ENSRNOG00000014294, ENSRNOG00000019614, ENSRNOG00000016434, ENSRNOG00000014979, ENSRNOG00000006695, ENSRNOG00000028541, ENSRNOG00000025111, ENSRNOG00000024452
BP	GO:0032735	positive regulation of interleukin-12 production	12	1.64875e-06	0.000408536	ENSRNOG00000054764, ENSRNOG00000012160, ENSRNOG00000037409, ENSRNOG00000017869, ENSRNOG00000048161, ENSRNOG00000010665, ENSRNOG00000017703, ENSRNOG00000004639, ENSRNOG00000012556, ENSRNOG00000051986, ENSRNOG00000011054, ENSRNOG00000011680
CC	GO:0045121	membrane raft	32	2.80466e-06	0.000305147	ENSRNOG00000009705, ENSRNOG00000030763, ENSRNOG00000001224, ENSRNOG00000000655, ENSRNOG00000019374, ENSRNOG00000013000, ENSRNOG00000018524, ENSRNOG00000018985, ENSRNOG00000027839, ENSRNOG00000020125, ENSRNOG00000014963, ENSRNOG00000052407, ENSRNOG00000008552, ENSRNOG00000047204, ENSRNOG00000046452, ENSRNOG00000006410, ENSRNOG00000007980, ENSRNOG00000005731, ENSRNOG00000003232, ENSRNOG00000003476,…
BP	GO:0030889	negative regulation of B cell proliferation	9	2.90562e-06	0.000671974	ENSRNOG00000030246, ENSRNOG00000000321, ENSRNOG00000002304, ENSRNOG00000010798, ENSRNOG00000052407, ENSRNOG00000008180, ENSRNOG00000046452, ENSRNOG00000017020, ENSRNOG00000004131
BP	GO:0042100	B cell proliferation	12	3.22244e-06	0.000698666	ENSRNOG00000003069, ENSRNOG00000020125, ENSRNOG00000000321, ENSRNOG00000005404, ENSRNOG00000000655, ENSRNOG00000004409, ENSRNOG00000046452, ENSRNOG00000052348, ENSRNOG00000034164, ENSRNOG00000007664, ENSRNOG00000010121, ENSRNOG00000001839
MF	GO:0004713	protein tyrosine kinase activity	16	3.4916e-06	0.000626393	ENSRNOG00000054764, ENSRNOG00000009705, ENSRNOG00000056714, ENSRNOG00000002278, ENSRNOG00000009912, ENSRNOG00000010798, ENSRNOG00000019374, ENSRNOG00000012160, ENSRNOG00000027839, ENSRNOG00000018416, ENSRNOG00000018669, ENSRNOG00000008180, ENSRNOG00000052407, ENSRNOG00000004392, ENSRNOG00000032948, ENSRNOG00000009331
BP	GO:0006955	immune response	30	4.09283e-06	0.000794322	ENSRNOG00000033215, ENSRNOG00000011668, ENSRNOG00000003866, ENSRNOG00000042193, ENSRNOG00000000137, ENSRNOG00000004639, ENSRNOG00000050898, ENSRNOG00000031058, ENSRNOG00000050430, ENSRNOG00000049829, ENSRNOG00000013280, ENSRNOG00000008394, ENSRNOG00000037908, ENSRNOG00000047571, ENSRNOG00000001752, ENSRNOG00000000321, ENSRNOG00000048161, ENSRNOG00000010665, ENSRNOG00000052348, ENSRNOG00000030431,…
BP	GO:0016064	immunoglobulin mediated immune response	9	4.12159e-06	0.000794322	ENSRNOG00000032844, ENSRNOG00000015773, ENSRNOG00000000187, ENSRNOG00000018735, ENSRNOG00000046452, ENSRNOG00000017020, ENSRNOG00000018311, ENSRNOG00000034164, ENSRNOG00000015441
BP	GO:0001782	B cell homeostasis	10	4.53546e-06	0.000828079	ENSRNOG00000036829, ENSRNOG00000002304, ENSRNOG00000016846, ENSRNOG00000008180, ENSRNOG00000004409, ENSRNOG00000052348, ENSRNOG00000007664, ENSRNOG00000013321, ENSRNOG00000001839, ENSRNOG00000004131
BP	GO:0045087	innate immune response	37	5.04171e-06	0.000874484	ENSRNOG00000000053, ENSRNOG00000025990, ENSRNOG00000009705, ENSRNOG00000056714, ENSRNOG00000003666, ENSRNOG00000003622, ENSRNOG00000003689, ENSRNOG00000000137, ENSRNOG00000010798, ENSRNOG00000028707, ENSRNOG00000033693, ENSRNOG00000055169, ENSRNOG00000058590, ENSRNOG00000042455, ENSRNOG00000046834, ENSRNOG00000027839, ENSRNOG00000018669, ENSRNOG00000007558, ENSRNOG00000007437, ENSRNOG00000050000,…
MF	GO:0004672	protein kinase activity	29	5.98915e-06	0.000895378	ENSRNOG00000005883, ENSRNOG00000019271, ENSRNOG00000000632, ENSRNOG00000058938, ENSRNOG00000011589, ENSRNOG00000054371, ENSRNOG00000007906, ENSRNOG00000018985, ENSRNOG00000013598, ENSRNOG00000027839, ENSRNOG00000004392, ENSRNOG00000027017, ENSRNOG00000004110, ENSRNOG00000004131, ENSRNOG00000007931, ENSRNOG00000001113, ENSRNOG00000005659, ENSRNOG00000013177, ENSRNOG00000016378, ENSRNOG00000012160,…
BP	GO:0050870	positive regulation of T cell activation	10	7.7201e-06	0.00127529	ENSRNOG00000032844, ENSRNOG00000033912, ENSRNOG00000009705, ENSRNOG00000033215, ENSRNOG00000006604, ENSRNOG00000000454, ENSRNOG00000017181, ENSRNOG00000019430, ENSRNOG00000030431, ENSRNOG00000026762
MF	GO:0004888	transmembrane signaling receptor activity	18	9.06161e-06	0.00116118	ENSRNOG00000003136, ENSRNOG00000004405, ENSRNOG00000048161, ENSRNOG00000036726, ENSRNOG00000036711, ENSRNOG00000034230, ENSRNOG00000017485, ENSRNOG00000016164, ENSRNOG00000042455, ENSRNOG00000015773, ENSRNOG00000042524, ENSRNOG00000015994, ENSRNOG00000020125, ENSRNOG00000019527, ENSRNOG00000015945, ENSRNOG00000046452, ENSRNOG00000004441, ENSRNOG00000011917
CC	GO:0005856	cytoskeleton	37	1.04339e-05	0.000946009	ENSRNOG00000009805, ENSRNOG00000002278, ENSRNOG00000003469, ENSRNOG00000036865, ENSRNOG00000002538, ENSRNOG00000014285, ENSRNOG00000018524, ENSRNOG00000027839, ENSRNOG00000018804, ENSRNOG00000018669, ENSRNOG00000029131, ENSRNOG00000006410, ENSRNOG00000008471, ENSRNOG00000002540, ENSRNOG00000003597, ENSRNOG00000001796, ENSRNOG00000009912, ENSRNOG00000012820, ENSRNOG00000059753, ENSRNOG00000017020,…
BP	GO:0042102	positive regulation of T cell proliferation	14	1.20643e-05	0.00185698	ENSRNOG00000036829, ENSRNOG00000004639, ENSRNOG00000000655, ENSRNOG00000019430, ENSRNOG00000004409, ENSRNOG00000036711, ENSRNOG00000017980, ENSRNOG00000020884, ENSRNOG00000007270, ENSRNOG00000018669, ENSRNOG00000032948, ENSRNOG00000007664, ENSRNOG00000028541, ENSRNOG00000024452
BP	GO:0007166	cell surface receptor signaling pathway	21	1.23121e-05	0.00185698	ENSRNOG00000009705, ENSRNOG00000003136, ENSRNOG00000030246, ENSRNOG00000000321, ENSRNOG00000019093, ENSRNOG00000036711, ENSRNOG00000017980, ENSRNOG00000034230, ENSRNOG00000016164, ENSRNOG00000050430, ENSRNOG00000016575, ENSRNOG00000042524, ENSRNOG00000020945, ENSRNOG00000015994, ENSRNOG00000012160, ENSRNOG00000027839, ENSRNOG00000014963, ENSRNOG00000016846, ENSRNOG00000015945, ENSRNOG00000008444,…
BP	GO:0042110	T cell activation	11	1.82782e-05	0.00264197	ENSRNOG00000030763, ENSRNOG00000038286, ENSRNOG00000013554, ENSRNOG00000012942, ENSRNOG00000006932, ENSRNOG00000005404, ENSRNOG00000020337, ENSRNOG00000019430, ENSRNOG00000031058, ENSRNOG00000050430, ENSRNOG00000024210
BP	GO:0006911	phagocytosis, engulfment	13	2.21585e-05	0.0030686	ENSRNOG00000025990, ENSRNOG00000050000, ENSRNOG00000031930, ENSRNOG00000049870, ENSRNOG00000001224, ENSRNOG00000055169, ENSRNOG00000058590, ENSRNOG00000014312, ENSRNOG00000034190, ENSRNOG00000021345, ENSRNOG00000046452, ENSRNOG00000009347, ENSRNOG00000007243
MF	GO:0000976	transcription regulatory region sequence-specific DNA binding	27	2.28742e-05	0.00256477	ENSRNOG00000006831, ENSRNOG00000004410, ENSRNOG00000009722, ENSRNOG00000011523, ENSRNOG00000003689, ENSRNOG00000002659, ENSRNOG00000017674, ENSRNOG00000009184, ENSRNOG00000034240, ENSRNOG00000018803, ENSRNOG00000023258, ENSRNOG00000010708, ENSRNOG00000003581, ENSRNOG00000028661, ENSRNOG00000007387, ENSRNOG00000004444, ENSRNOG00000004588, ENSRNOG00000008904, ENSRNOG00000006048, ENSRNOG00000008941,…
BP	GO:0050869	negative regulation of B cell activation	6	2.2999e-05	0.0030686	ENSRNOG00000030930, ENSRNOG00000032247, ENSRNOG00000052407, ENSRNOG00000021510, ENSRNOG00000017020, ENSRNOG00000011054
BP	GO:0008360	regulation of cell shape	19	2.39468e-05	0.00307672	ENSRNOG00000002540, ENSRNOG00000003232, ENSRNOG00000009912, ENSRNOG00000049361, ENSRNOG00000056297, ENSRNOG00000003207, ENSRNOG00000019430, ENSRNOG00000031168, ENSRNOG00000018524, ENSRNOG00000028090, ENSRNOG00000025209, ENSRNOG00000027839, ENSRNOG00000042449, ENSRNOG00000007350, ENSRNOG00000007047, ENSRNOG00000020393, ENSRNOG00000009331, ENSRNOG00000009760, ENSRNOG00000007970
MF	GO:0004714	transmembrane receptor protein tyrosine kinase activity	15	3.88529e-05	0.00387234	ENSRNOG00000054764, ENSRNOG00000009705, ENSRNOG00000002278, ENSRNOG00000057702, ENSRNOG00000009912, ENSRNOG00000010798, ENSRNOG00000019374, ENSRNOG00000012160, ENSRNOG00000014367, ENSRNOG00000027839, ENSRNOG00000018669, ENSRNOG00000008180, ENSRNOG00000052407, ENSRNOG00000032948, ENSRNOG00000009331
BP	GO:0032729	positive regulation of interferon-gamma production	14	4.08661e-05	0.00506302	ENSRNOG00000054764, ENSRNOG00000048161, ENSRNOG00000005404, ENSRNOG00000012556, ENSRNOG00000004409, ENSRNOG00000059073, ENSRNOG00000019614, ENSRNOG00000038286, ENSRNOG00000007270, ENSRNOG00000017869, ENSRNOG00000032948, ENSRNOG00000007664, ENSRNOG00000008153, ENSRNOG00000024452
BP	GO:0032755	positive regulation of interleukin-6 production	16	5.70937e-05	0.00682959	ENSRNOG00000037409, ENSRNOG00000048161, ENSRNOG00000004639, ENSRNOG00000011500, ENSRNOG00000015082, ENSRNOG00000012556, ENSRNOG00000055650, ENSRNOG00000051986, ENSRNOG00000011153, ENSRNOG00000011054, ENSRNOG00000011680, ENSRNOG00000012160, ENSRNOG00000018985, ENSRNOG00000018735, ENSRNOG00000052407, ENSRNOG00000017703
MF	GO:0003677	DNA binding	65	6.65586e-05	0.00597031	ENSRNOG00000006732, ENSRNOG00000054017, ENSRNOG00000006137, ENSRNOG00000009722, ENSRNOG00000028845, ENSRNOG00000039859, ENSRNOG00000011523, ENSRNOG00000031778, ENSRNOG00000017030, ENSRNOG00000003703, ENSRNOG00000001845, ENSRNOG00000034164, ENSRNOG00000017674, ENSRNOG00000053047, ENSRNOG00000024729, ENSRNOG00000006170, ENSRNOG00000014605, ENSRNOG00000003581, ENSRNOG00000010708, ENSRNOG00000048411,…
BP	GO:0032715	negative regulation of interleukin-6 production	12	0.000125835	0.0145508	ENSRNOG00000054764, ENSRNOG00000059073, ENSRNOG00000019614, ENSRNOG00000034195, ENSRNOG00000036829, ENSRNOG00000032247, ENSRNOG00000000321, ENSRNOG00000048161, ENSRNOG00000019374, ENSRNOG00000017020, ENSRNOG00000014294, ENSRNOG00000024210
CC	GO:0005829	cytosol	193	0.000126525	0.00888362	ENSRNOG00000013309, ENSRNOG00000036829, ENSRNOG00000003866, ENSRNOG00000000994, ENSRNOG00000005404, ENSRNOG00000000632, ENSRNOG00000054371, ENSRNOG00000002417, ENSRNOG00000002538, ENSRNOG00000002659, ENSRNOG00000005809, ENSRNOG00000017751, ENSRNOG00000000519, ENSRNOG00000024729, ENSRNOG00000020647, ENSRNOG00000019413, ENSRNOG00000012051, ENSRNOG00000025938, ENSRNOG00000061070, ENSRNOG00000006170,…
CC	GO:0005938	cell cortex	19	0.000134289	0.00888362	ENSRNOG00000002540, ENSRNOG00000031930, ENSRNOG00000004772, ENSRNOG00000061527, ENSRNOG00000002248, ENSRNOG00000004639, ENSRNOG00000012820, ENSRNOG00000059753, ENSRNOG00000012378, ENSRNOG00000050386, ENSRNOG00000018524, ENSRNOG00000013598, ENSRNOG00000027839, ENSRNOG00000007350, ENSRNOG00000026764, ENSRNOG00000007047, ENSRNOG00000005662, ENSRNOG00000020393
BP	GO:0030890	positive regulation of B cell proliferation	10	0.000135138	0.0151223	ENSRNOG00000036829, ENSRNOG00000003069, ENSRNOG00000048161, ENSRNOG00000018735, ENSRNOG00000052407, ENSRNOG00000000655, ENSRNOG00000004409, ENSRNOG00000003064, ENSRNOG00000007664, ENSRNOG00000051499
BP	GO:0032743	positive regulation of interleukin-2 production	9	0.000141755	0.0153671	ENSRNOG00000016434, ENSRNOG00000061070, ENSRNOG00000017181, ENSRNOG00000004639, ENSRNOG00000000655, ENSRNOG00000004409, ENSRNOG00000051986, ENSRNOG00000028541, ENSRNOG00000024452
CC	GO:0042613	MHC class II protein complex	6	0.000146972	0.00888362	ENSRNOG00000032844, ENSRNOG00000033215, ENSRNOG00000000454, ENSRNOG00000018735, ENSRNOG00000030431, ENSRNOG00000026762
MF	GO:0023026	MHC class II protein complex binding	6	0.000150194	0.0116836	ENSRNOG00000032844, ENSRNOG00000033215, ENSRNOG00000000454, ENSRNOG00000018735, ENSRNOG00000030431, ENSRNOG00000026762
MF	GO:0005096	GTPase activator activity	23	0.000156302	0.0116836	ENSRNOG00000008737, ENSRNOG00000049033, ENSRNOG00000036829, ENSRNOG00000056826, ENSRNOG00000006604, ENSRNOG00000006932, ENSRNOG00000031168, ENSRNOG00000012002, ENSRNOG00000017671, ENSRNOG00000058545, ENSRNOG00000013220, ENSRNOG00000015674, ENSRNOG00000020726, ENSRNOG00000013920, ENSRNOG00000002180, ENSRNOG00000021510, ENSRNOG00000004192, ENSRNOG00000009347, ENSRNOG00000013836, ENSRNOG00000009054,…
BP	GO:0018105	peptidyl-serine phosphorylation	20	0.000180115	0.0189339	ENSRNOG00000058938, ENSRNOG00000011589, ENSRNOG00000003469, ENSRNOG00000000632, ENSRNOG00000054371, ENSRNOG00000004726, ENSRNOG00000013397, ENSRNOG00000013177, ENSRNOG00000000519, ENSRNOG00000042411, ENSRNOG00000020505, ENSRNOG00000012160, ENSRNOG00000018985, ENSRNOG00000016434, ENSRNOG00000012061, ENSRNOG00000018416, ENSRNOG00000015603, ENSRNOG00000013529, ENSRNOG00000005274, ENSRNOG00000004131
BP	GO:0030217	T cell differentiation	10	0.00018615	0.0189928	ENSRNOG00000002540, ENSRNOG00000004444, ENSRNOG00000019614, ENSRNOG00000009705, ENSRNOG00000007049, ENSRNOG00000004623, ENSRNOG00000000655, ENSRNOG00000019430, ENSRNOG00000007200, ENSRNOG00000050430
BP	GO:0050832	defense response to fungus	8	0.000196515	0.0194774	ENSRNOG00000020647, ENSRNOG00000030093, ENSRNOG00000016846, ENSRNOG00000008310, ENSRNOG00000015082, ENSRNOG00000033685, ENSRNOG00000028707, ENSRNOG00000011153
BP	GO:0007229	integrin-mediated signaling pathway	14	0.000219481	0.0211494	ENSRNOG00000005214, ENSRNOG00000022071, ENSRNOG00000021161, ENSRNOG00000002278, ENSRNOG00000012208, ENSRNOG00000006604, ENSRNOG00000001224, ENSRNOG00000006327, ENSRNOG00000009912, ENSRNOG00000017980, ENSRNOG00000050430, ENSRNOG00000012160, ENSRNOG00000027839, ENSRNOG00000026039
MF	GO:0034987	immunoglobulin receptor binding	9	0.000223736	0.0154378	ENSRNOG00000025990, ENSRNOG00000058590, ENSRNOG00000050000, ENSRNOG00000049870, ENSRNOG00000014312, ENSRNOG00000003666, ENSRNOG00000034190, ENSRNOG00000009912, ENSRNOG00000055169
BP	GO:0007169	transmembrane receptor protein tyrosine kinase signaling pathway	15	0.000231101	0.0216673	ENSRNOG00000054764, ENSRNOG00000009705, ENSRNOG00000056714, ENSRNOG00000002014, ENSRNOG00000057702, ENSRNOG00000009912, ENSRNOG00000010798, ENSRNOG00000012160, ENSRNOG00000013564, ENSRNOG00000014367, ENSRNOG00000027839, ENSRNOG00000008180, ENSRNOG00000013967, ENSRNOG00000028198, ENSRNOG00000009331
MF	GO:0019901	protein kinase binding	41	0.000249955	0.0160149	ENSRNOG00000009705, ENSRNOG00000002014, ENSRNOG00000004410, ENSRNOG00000007049, ENSRNOG00000001224, ENSRNOG00000011523, ENSRNOG00000004639, ENSRNOG00000034025, ENSRNOG00000000655, ENSRNOG00000051986, ENSRNOG00000050258, ENSRNOG00000031058, ENSRNOG00000038881, ENSRNOG00000015796, ENSRNOG00000020884, ENSRNOG00000003084, ENSRNOG00000006410, ENSRNOG00000010708, ENSRNOG00000002540, ENSRNOG00000007437,…
MF	GO:0042609	CD4 receptor binding	5	0.000273268	0.0163414	ENSRNOG00000009705, ENSRNOG00000033215, ENSRNOG00000018735, ENSRNOG00000024000, ENSRNOG00000011680
CC	GO:0016514	SWI/SNF complex	7	0.000285219	0.015243	ENSRNOG00000009271, ENSRNOG00000006137, ENSRNOG00000007049, ENSRNOG00000010557, ENSRNOG00000017030, ENSRNOG00000020804, ENSRNOG00000056017
BP	GO:0043304	regulation of mast cell degranulation	5	0.000287008	0.0262008	ENSRNOG00000007439, ENSRNOG00000000994, ENSRNOG00000010798, ENSRNOG00000008180, ENSRNOG00000007350
CC	GO:0005911	cell-cell junction	22	0.000308223	0.015243	ENSRNOG00000009705, ENSRNOG00000009805, ENSRNOG00000002278, ENSRNOG00000003866, ENSRNOG00000054371, ENSRNOG00000034025, ENSRNOG00000012820, ENSRNOG00000019374, ENSRNOG00000019430, ENSRNOG00000000502, ENSRNOG00000017980, ENSRNOG00000011133, ENSRNOG00000014294, ENSRNOG00000012002, ENSRNOG00000031058, ENSRNOG00000000869, ENSRNOG00000033087, ENSRNOG00000050430, ENSRNOG00000017874, ENSRNOG00000014979,…
BP	GO:0043044	ATP-dependent chromatin remodeling	7	0.000313257	0.0278638	ENSRNOG00000009271, ENSRNOG00000006137, ENSRNOG00000010557, ENSRNOG00000009722, ENSRNOG00000011566, ENSRNOG00000017030, ENSRNOG00000020804
BP	GO:0002639	positive regulation of immunoglobulin production	8	0.000361665	0.0313654	ENSRNOG00000009184, ENSRNOG00000020699, ENSRNOG00000048161, ENSRNOG00000022009, ENSRNOG00000052407, ENSRNOG00000000655, ENSRNOG00000004409, ENSRNOG00000015441
BP	GO:0007264	small GTPase mediated signal transduction	13	0.000370741	0.0313683	ENSRNOG00000006932, ENSRNOG00000005404, ENSRNOG00000004736, ENSRNOG00000054560, ENSRNOG00000013321, ENSRNOG00000050430, ENSRNOG00000015894, ENSRNOG00000028090, ENSRNOG00000016910, ENSRNOG00000004192, ENSRNOG00000007422, ENSRNOG00000004482, ENSRNOG00000021098
BP	GO:0000122	negative regulation of transcription from RNA polymerase II promoter	61	0.000392303	0.0323309	ENSRNOG00000004158, ENSRNOG00000031930, ENSRNOG00000006137, ENSRNOG00000009722, ENSRNOG00000001245, ENSRNOG00000039859, ENSRNOG00000007229, ENSRNOG00000011523, ENSRNOG00000004639, ENSRNOG00000050258, ENSRNOG00000002659, ENSRNOG00000017674, ENSRNOG00000018524, ENSRNOG00000038881, ENSRNOG00000024729, ENSRNOG00000034240, ENSRNOG00000006170, ENSRNOG00000017714, ENSRNOG00000051615, ENSRNOG00000014723,…
BP	GO:0019882	antigen processing and presentation	9	0.000400757	0.0323309	ENSRNOG00000054764, ENSRNOG00000011623, ENSRNOG00000018735, ENSRNOG00000017703, ENSRNOG00000029662, ENSRNOG00000030431, ENSRNOG00000052499, ENSRNOG00000026762, ENSRNOG00000008001
CC	GO:0031234	extrinsic component of cytoplasmic side of plasma membrane	11	0.000433471	0.0196507	ENSRNOG00000049033, ENSRNOG00000009705, ENSRNOG00000056714, ENSRNOG00000012160, ENSRNOG00000027839, ENSRNOG00000010798, ENSRNOG00000009912, ENSRNOG00000008180, ENSRNOG00000012002, ENSRNOG00000011550, ENSRNOG00000009331
BP	GO:0045588	positive regulation of gamma-delta T cell differentiation	5	0.000463013	0.0365044	ENSRNOG00000009705, ENSRNOG00000036829, ENSRNOG00000012160, ENSRNOG00000000655, ENSRNOG00000010121
MF	GO:0042393	histone binding	19	0.000466001	0.0247498	ENSRNOG00000005115, ENSRNOG00000026110, ENSRNOG00000032995, ENSRNOG00000004630, ENSRNOG00000009722, ENSRNOG00000050106, ENSRNOG00000010386, ENSRNOG00000020804, ENSRNOG00000010121, ENSRNOG00000018584, ENSRNOG00000012061, ENSRNOG00000014434, ENSRNOG00000017714, ENSRNOG00000045770, ENSRNOG00000016519, ENSRNOG00000028661, ENSRNOG00000048411, ENSRNOG00000005274, ENSRNOG00000004131
MF	GO:0005085	guanyl-nucleotide exchange factor activity	21	0.000469059	0.0247498	ENSRNOG00000046050, ENSRNOG00000003435, ENSRNOG00000052391, ENSRNOG00000012568, ENSRNOG00000006932, ENSRNOG00000005404, ENSRNOG00000050106, ENSRNOG00000004736, ENSRNOG00000054560, ENSRNOG00000000869, ENSRNOG00000000528, ENSRNOG00000013321, ENSRNOG00000050430, ENSRNOG00000015894, ENSRNOG00000028090, ENSRNOG00000016910, ENSRNOG00000022373, ENSRNOG00000007422, ENSRNOG00000006079, ENSRNOG00000004482,…
CC	GO:0009986	cell surface	48	0.000493684	0.0206588	ENSRNOG00000032844, ENSRNOG00000011803, ENSRNOG00000003069, ENSRNOG00000010813, ENSRNOG00000030763, ENSRNOG00000033215, ENSRNOG00000001224, ENSRNOG00000003866, ENSRNOG00000034025, ENSRNOG00000000655, ENSRNOG00000002659, ENSRNOG00000034164, ENSRNOG00000016164, ENSRNOG00000015310, ENSRNOG00000038540, ENSRNOG00000017874, ENSRNOG00000020945, ENSRNOG00000046834, ENSRNOG00000014367, ENSRNOG00000013554,…
CC	GO:0005634	nucleus	249	0.000539682	0.0209705	ENSRNOG00000054017, ENSRNOG00000002014, ENSRNOG00000009205, ENSRNOG00000010557, ENSRNOG00000011523, ENSRNOG00000003469, ENSRNOG00000000632, ENSRNOG00000054371, ENSRNOG00000010312, ENSRNOG00000033433, ENSRNOG00000011762, ENSRNOG00000001845, ENSRNOG00000000636, ENSRNOG00000053047, ENSRNOG00000000519, ENSRNOG00000024729, ENSRNOG00000012051, ENSRNOG00000025938, ENSRNOG00000006170, ENSRNOG00000019813,…
BP	GO:0006909	phagocytosis	11	0.000557396	0.0427383	ENSRNOG00000059140, ENSRNOG00000006940, ENSRNOG00000042449, ENSRNOG00000029814, ENSRNOG00000007439, ENSRNOG00000017869, ENSRNOG00000033685, ENSRNOG00000019430, ENSRNOG00000046452, ENSRNOG00000009331, ENSRNOG00000050430
BP	GO:0030097	hemopoiesis	12	0.000566723	0.0427383	ENSRNOG00000003123, ENSRNOG00000004444, ENSRNOG00000054764, ENSRNOG00000008180, ENSRNOG00000000699, ENSRNOG00000014879, ENSRNOG00000009258, ENSRNOG00000052348, ENSRNOG00000000636, ENSRNOG00000028198, ENSRNOG00000016595, ENSRNOG00000002042
MF	GO:0043274	phospholipase binding	7	0.000580304	0.0281285	ENSRNOG00000009705, ENSRNOG00000012160, ENSRNOG00000032247, ENSRNOG00000013774, ENSRNOG00000052407, ENSRNOG00000013967, ENSRNOG00000031058
MF	GO:0005080	protein kinase C binding	10	0.00059581	0.0281285	ENSRNOG00000004158, ENSRNOG00000005214, ENSRNOG00000016434, ENSRNOG00000012061, ENSRNOG00000048915, ENSRNOG00000012820, ENSRNOG00000018086, ENSRNOG00000006695, ENSRNOG00000053047, ENSRNOG00000004131
BP	GO:0050790	regulation of catalytic activity	30	0.000622	0.0451356	ENSRNOG00000046050, ENSRNOG00000006932, ENSRNOG00000005809, ENSRNOG00000013321, ENSRNOG00000050430, ENSRNOG00000015894, ENSRNOG00000015674, ENSRNOG00000019838, ENSRNOG00000052407, ENSRNOG00000015614, ENSRNOG00000004192, ENSRNOG00000003084, ENSRNOG00000013836, ENSRNOG00000006079, ENSRNOG00000049033, ENSRNOG00000006940, ENSRNOG00000003435, ENSRNOG00000012568, ENSRNOG00000050106, ENSRNOG00000054560,…
BP	GO:0030888	regulation of B cell proliferation	4	0.000624535	0.0451356	ENSRNOG00000022009, ENSRNOG00000037339, ENSRNOG00000024000, ENSRNOG00000007200
CC	GO:0000793	condensed chromosome	8	0.000664913	0.0241142	ENSRNOG00000003123, ENSRNOG00000061085, ENSRNOG00000011523, ENSRNOG00000032929, ENSRNOG00000014605, ENSRNOG00000001845, ENSRNOG00000017674, ENSRNOG00000053047
BP	GO:0050764	regulation of phagocytosis	5	0.000704303	0.0488645	ENSRNOG00000012160, ENSRNOG00000009912, ENSRNOG00000054371, ENSRNOG00000000655, ENSRNOG00000009331
BP	GO:0002381	immunoglobulin production involved in immunoglobulin mediated immune response	5	0.000704303	0.0488645	ENSRNOG00000032844, ENSRNOG00000033215, ENSRNOG00000000454, ENSRNOG00000030431, ENSRNOG00000026762
MF	GO:0003690	double-stranded DNA binding	17	0.000803168	0.0342952	ENSRNOG00000006622, ENSRNOG00000048264, ENSRNOG00000004410, ENSRNOG00000001245, ENSRNOG00000003831, ENSRNOG00000011688, ENSRNOG00000015796, ENSRNOG00000018830, ENSRNOG00000013850, ENSRNOG00000013774, ENSRNOG00000051528, ENSRNOG00000023258, ENSRNOG00000024733, ENSRNOG00000047459, ENSRNOG00000006695, ENSRNOG00000060355, ENSRNOG00000023143
MF	GO:0042826	histone deacetylase binding	15	0.000833668	0.0342952	ENSRNOG00000004158, ENSRNOG00000006622, ENSRNOG00000010625, ENSRNOG00000039859, ENSRNOG00000031778, ENSRNOG00000004639, ENSRNOG00000010121, ENSRNOG00000053047, ENSRNOG00000034240, ENSRNOG00000019913, ENSRNOG00000015329, ENSRNOG00000003084, ENSRNOG00000060355, ENSRNOG00000007200, ENSRNOG00000004131
BP	GO:0045893	positive regulation of transcription, DNA-templated	49	0.000849968	0.0578145	ENSRNOG00000006137, ENSRNOG00000003069, ENSRNOG00000006418, ENSRNOG00000028845, ENSRNOG00000007229, ENSRNOG00000031778, ENSRNOG00000017030, ENSRNOG00000011762, ENSRNOG00000002659, ENSRNOG00000017674, ENSRNOG00000018803, ENSRNOG00000061070, ENSRNOG00000014644, ENSRNOG00000010708, ENSRNOG00000008904, ENSRNOG00000055858, ENSRNOG00000008941, ENSRNOG00000055650, ENSRNOG00000012684, ENSRNOG00000019620,…
MF	GO:0035591	signaling adaptor activity	7	0.000869901	0.0342952	ENSRNOG00000002014, ENSRNOG00000032247, ENSRNOG00000042449, ENSRNOG00000020337, ENSRNOG00000013967, ENSRNOG00000016164, ENSRNOG00000007047
MF	GO:1990782	protein tyrosine kinase binding	9	0.000879365	0.0342952	ENSRNOG00000027992, ENSRNOG00000019614, ENSRNOG00000032247, ENSRNOG00000019374, ENSRNOG00000047204, ENSRNOG00000051986, ENSRNOG00000013967, ENSRNOG00000008444, ENSRNOG00000028198
BP	GO:0031663	lipopolysaccharide-mediated signaling pathway	8	0.00101496	0.0669378	ENSRNOG00000019614, ENSRNOG00000034195, ENSRNOG00000020884, ENSRNOG00000017181, ENSRNOG00000008180, ENSRNOG00000000137, ENSRNOG00000015603, ENSRNOG00000051986
BP	GO:0002503	peptide antigen assembly with MHC class II protein complex	5	0.00102269	0.0669378	ENSRNOG00000032844, ENSRNOG00000033215, ENSRNOG00000000454, ENSRNOG00000030431, ENSRNOG00000026762
BP	GO:0045059	positive thymic T cell selection	5	0.00143007	0.0902336	ENSRNOG00000015994, ENSRNOG00000018735, ENSRNOG00000006932, ENSRNOG00000015945, ENSRNOG00000000655
BP	GO:0032956	regulation of actin cytoskeleton organization	11	0.0014341	0.0902336	ENSRNOG00000002540, ENSRNOG00000008409, ENSRNOG00000048915, ENSRNOG00000019430, ENSRNOG00000007350, ENSRNOG00000013836, ENSRNOG00000003064, ENSRNOG00000012002, ENSRNOG00000020393, ENSRNOG00000021285, ENSRNOG00000027894
BP	GO:0006915	apoptotic process	33	0.00145664	0.0902336	ENSRNOG00000000394, ENSRNOG00000006557, ENSRNOG00000048472, ENSRNOG00000009705, ENSRNOG00000000632, ENSRNOG00000031778, ENSRNOG00000003328, ENSRNOG00000033693, ENSRNOG00000042411, ENSRNOG00000013598, ENSRNOG00000013774, ENSRNOG00000019439, ENSRNOG00000009465, ENSRNOG00000004392, ENSRNOG00000052070, ENSRNOG00000003084, ENSRNOG00000016707, ENSRNOG00000005342, ENSRNOG00000025672, ENSRNOG00000002350,…
BP	GO:0043154	negative regulation of cysteine-type endopeptidase activity involved in apoptotic process	11	0.00157793	0.0940804	ENSRNOG00000005731, ENSRNOG00000042411, ENSRNOG00000004630, ENSRNOG00000018803, ENSRNOG00000018958, ENSRNOG00000009465, ENSRNOG00000026136, ENSRNOG00000033693, ENSRNOG00000018584, ENSRNOG00000017751, ENSRNOG00000022792
BP	GO:0007159	leukocyte cell-cell adhesion	7	0.0016001	0.0940804	ENSRNOG00000018524, ENSRNOG00000021161, ENSRNOG00000012160, ENSRNOG00000000321, ENSRNOG00000001224, ENSRNOG00000000655, ENSRNOG00000017980
BP	GO:0002376	immune system process	7	0.0016001	0.0940804	ENSRNOG00000016378, ENSRNOG00000007437, ENSRNOG00000012160, ENSRNOG00000008941, ENSRNOG00000061070, ENSRNOG00000017869, ENSRNOG00000004441
MF	GO:0003823	antigen binding	9	0.00164629	0.0615302	ENSRNOG00000025990, ENSRNOG00000058590, ENSRNOG00000050000, ENSRNOG00000009705, ENSRNOG00000049870, ENSRNOG00000014312, ENSRNOG00000034190, ENSRNOG00000009342, ENSRNOG00000055169
MF	GO:0017124	SH3 domain binding	13	0.00175536	0.0629822	ENSRNOG00000009805, ENSRNOG00000052391, ENSRNOG00000017020, ENSRNOG00000014294, ENSRNOG00000031058, ENSRNOG00000038881, ENSRNOG00000019614, ENSRNOG00000014476, ENSRNOG00000008180, ENSRNOG00000015603, ENSRNOG00000008444, ENSRNOG00000013836, ENSRNOG00000006410
BP	GO:0045060	negative thymic T cell selection	5	0.00193828	0.112065	ENSRNOG00000010665, ENSRNOG00000018735, ENSRNOG00000006932, ENSRNOG00000000655, ENSRNOG00000036711
BP	GO:0090330	regulation of platelet aggregation	4	0.00205609	0.115042	ENSRNOG00000012160, ENSRNOG00000010798, ENSRNOG00000008180, ENSRNOG00000013628
BP	GO:0043320	natural killer cell degranulation	4	0.00205609	0.115042	ENSRNOG00000007439, ENSRNOG00000017749, ENSRNOG00000019430, ENSRNOG00000052499
CC	GO:0005884	actin filament	12	0.00210665	0.071626	ENSRNOG00000038881, ENSRNOG00000018524, ENSRNOG00000061527, ENSRNOG00000048915, ENSRNOG00000049361, ENSRNOG00000001700, ENSRNOG00000019430, ENSRNOG00000012378, ENSRNOG00000007350, ENSRNOG00000017020, ENSRNOG00000031058, ENSRNOG00000009331
MF	GO:0004674	protein serine/threonine kinase activity	27	0.00232417	0.0801839	ENSRNOG00000005883, ENSRNOG00000007925, ENSRNOG00000004217, ENSRNOG00000003469, ENSRNOG00000000632, ENSRNOG00000011589, ENSRNOG00000054371, ENSRNOG00000000519, ENSRNOG00000042411, ENSRNOG00000020505, ENSRNOG00000018985, ENSRNOG00000013598, ENSRNOG00000004131, ENSRNOG00000021061, ENSRNOG00000005659, ENSRNOG00000001138, ENSRNOG00000004726, ENSRNOG00000000529, ENSRNOG00000013177, ENSRNOG00000012160,…
BP	GO:0016601	Rac protein signal transduction	6	0.0024182	0.133155	ENSRNOG00000002540, ENSRNOG00000009805, ENSRNOG00000012378, ENSRNOG00000007350, ENSRNOG00000007047, ENSRNOG00000020393
BP	GO:0050871	positive regulation of B cell activation	8	0.0026797	0.145248	ENSRNOG00000025990, ENSRNOG00000058590, ENSRNOG00000050000, ENSRNOG00000049870, ENSRNOG00000014312, ENSRNOG00000034190, ENSRNOG00000048161, ENSRNOG00000055169
CC	GO:0042571	immunoglobulin complex, circulating	7	0.00274898	0.0879675	ENSRNOG00000025990, ENSRNOG00000058590, ENSRNOG00000050000, ENSRNOG00000049870, ENSRNOG00000014312, ENSRNOG00000034190, ENSRNOG00000055169
BP	GO:0071345	cellular response to cytokine stimulus	9	0.00279112	0.148563	ENSRNOG00000038881, ENSRNOG00000054764, ENSRNOG00000003866, ENSRNOG00000010665, ENSRNOG00000018669, ENSRNOG00000023258, ENSRNOG00000004639, ENSRNOG00000010121, ENSRNOG00000011153
MF	GO:0043565	sequence-specific DNA binding	31	0.00279805	0.0929574	ENSRNOG00000006831, ENSRNOG00000004410, ENSRNOG00000004630, ENSRNOG00000001424, ENSRNOG00000012556, ENSRNOG00000033433, ENSRNOG00000017674, ENSRNOG00000053047, ENSRNOG00000038140, ENSRNOG00000061070, ENSRNOG00000019913, ENSRNOG00000023258, ENSRNOG00000010708, ENSRNOG00000003581, ENSRNOG00000028661, ENSRNOG00000007200, ENSRNOG00000004444, ENSRNOG00000007437, ENSRNOG00000003595, ENSRNOG00000008904,…
BP	GO:0001779	natural killer cell differentiation	6	0.00292321	0.148563	ENSRNOG00000004444, ENSRNOG00000059073, ENSRNOG00000038286, ENSRNOG00000011668, ENSRNOG00000000655, ENSRNOG00000051499
BP	GO:0030031	cell projection assembly	6	0.00292321	0.148563	ENSRNOG00000002540, ENSRNOG00000036829, ENSRNOG00000052064, ENSRNOG00000007350, ENSRNOG00000007422, ENSRNOG00000020393
BP	GO:0006306	DNA methylation	6	0.00292321	0.148563	ENSRNOG00000010625, ENSRNOG00000004410, ENSRNOG00000006048, ENSRNOG00000039859, ENSRNOG00000019913, ENSRNOG00000017674
BP	GO:0006338	chromatin remodeling	15	0.00298955	0.148563	ENSRNOG00000006137, ENSRNOG00000004410, ENSRNOG00000006048, ENSRNOG00000032995, ENSRNOG00000055858, ENSRNOG00000009722, ENSRNOG00000010557, ENSRNOG00000012942, ENSRNOG00000011566, ENSRNOG00000017030, ENSRNOG00000020804, ENSRNOG00000009271, ENSRNOG00000014434, ENSRNOG00000051948, ENSRNOG00000019913
BP	GO:0043113	receptor clustering	7	0.00299782	0.148563	ENSRNOG00000012208, ENSRNOG00000006604, ENSRNOG00000001224, ENSRNOG00000004405, ENSRNOG00000022635, ENSRNOG00000006410, ENSRNOG00000017980
CC	GO:0032991	macromolecular complex	53	0.0032001	0.096714	ENSRNOG00000054017, ENSRNOG00000009805, ENSRNOG00000002014, ENSRNOG00000012735, ENSRNOG00000000994, ENSRNOG00000003866, ENSRNOG00000039859, ENSRNOG00000007229, ENSRNOG00000004639, ENSRNOG00000053047, ENSRNOG00000018524, ENSRNOG00000046834, ENSRNOG00000020726, ENSRNOG00000006410, ENSRNOG00000005115, ENSRNOG00000054764, ENSRNOG00000002724, ENSRNOG00000018054, ENSRNOG00000014294, ENSRNOG00000012002,…
MF	GO:0051019	mitogen-activated protein kinase binding	7	0.00324543	0.10397	ENSRNOG00000004003, ENSRNOG00000013862, ENSRNOG00000034025, ENSRNOG00000014061, ENSRNOG00000004726, ENSRNOG00000012002, ENSRNOG00000013177
BP	GO:0032760	positive regulation of tumor necrosis factor production	13	0.00325283	0.158931	ENSRNOG00000003622, ENSRNOG00000048161, ENSRNOG00000005404, ENSRNOG00000034025, ENSRNOG00000000655, ENSRNOG00000012556, ENSRNOG00000004409, ENSRNOG00000051986, ENSRNOG00000004726, ENSRNOG00000036711, ENSRNOG00000012160, ENSRNOG00000019549, ENSRNOG00000052407
BP	GO:0046834	lipid phosphorylation	5	0.00330357	0.159168	ENSRNOG00000001796, ENSRNOG00000017737, ENSRNOG00000023238, ENSRNOG00000022943, ENSRNOG00000017022
BP	GO:0048872	homeostasis of number of cells	7	0.00345751	0.164303	ENSRNOG00000055858, ENSRNOG00000016846, ENSRNOG00000010665, ENSRNOG00000052348, ENSRNOG00000021261, ENSRNOG00000001839, ENSRNOG00000024452
MF	GO:0003700	transcription factor activity, sequence-specific DNA binding	32	0.00348781	0.107882	ENSRNOG00000006831, ENSRNOG00000004410, ENSRNOG00000007049, ENSRNOG00000011668, ENSRNOG00000028845, ENSRNOG00000031778, ENSRNOG00000017030, ENSRNOG00000033433, ENSRNOG00000011762, ENSRNOG00000017674, ENSRNOG00000024729, ENSRNOG00000009184, ENSRNOG00000018803, ENSRNOG00000061070, ENSRNOG00000006170, ENSRNOG00000014644, ENSRNOG00000023258, ENSRNOG00000010708, ENSRNOG00000007200, ENSRNOG00000004444,…
MF	GO:0031492	nucleosomal DNA binding	6	0.00393402	0.108724	ENSRNOG00000048264, ENSRNOG00000011523, ENSRNOG00000051615, ENSRNOG00000050106, ENSRNOG00000047459, ENSRNOG00000060355
MF	GO:0003951	NAD+ kinase activity	5	0.00399621	0.108724	ENSRNOG00000001796, ENSRNOG00000017737, ENSRNOG00000023238, ENSRNOG00000022943, ENSRNOG00000017022
MF	GO:0004698	calcium-dependent protein kinase C activity	5	0.00399621	0.108724	ENSRNOG00000016434, ENSRNOG00000012061, ENSRNOG00000015603, ENSRNOG00000054371, ENSRNOG00000004131
MF	GO:0004896	cytokine receptor activity	8	0.0039999	0.108724	ENSRNOG00000054764, ENSRNOG00000015773, ENSRNOG00000000187, ENSRNOG00000007270, ENSRNOG00000003954, ENSRNOG00000018735, ENSRNOG00000005954, ENSRNOG00000015441
BP	GO:0006325	chromatin organization	15	0.00403071	0.188451	ENSRNOG00000004158, ENSRNOG00000006137, ENSRNOG00000048264, ENSRNOG00000004630, ENSRNOG00000009722, ENSRNOG00000039859, ENSRNOG00000012942, ENSRNOG00000012061, ENSRNOG00000038140, ENSRNOG00000025702, ENSRNOG00000051615, ENSRNOG00000047459, ENSRNOG00000060355, ENSRNOG00000048411, ENSRNOG00000004131
BP	GO:0032693	negative regulation of interleukin-10 production	6	0.00415452	0.188451	ENSRNOG00000018669, ENSRNOG00000052407, ENSRNOG00000046452, ENSRNOG00000008707, ENSRNOG00000004110, ENSRNOG00000008394
CC	GO:0044853	plasma membrane raft	7	0.00416245	0.119178	ENSRNOG00000018524, ENSRNOG00000020945, ENSRNOG00000015445, ENSRNOG00000001224, ENSRNOG00000029814, ENSRNOG00000020425, ENSRNOG00000000699
BP	GO:0033630	positive regulation of cell adhesion mediated by integrin	5	0.00418297	0.188451	ENSRNOG00000036829, ENSRNOG00000012160, ENSRNOG00000000321, ENSRNOG00000009465, ENSRNOG00000014294
BP	GO:0051279	regulation of release of sequestered calcium ion into cytosol	5	0.00418297	0.188451	ENSRNOG00000027839, ENSRNOG00000008180, ENSRNOG00000015603, ENSRNOG00000019430, ENSRNOG00000014294
BP	GO:0002504	antigen processing and presentation of peptide or polysaccharide antigen via MHC class II	4	0.00464286	0.203874	ENSRNOG00000032844, ENSRNOG00000033215, ENSRNOG00000000454, ENSRNOG00000030431
BP	GO:0090175	regulation of establishment of planar polarity	4	0.00464286	0.203874	ENSRNOG00000008138, ENSRNOG00000009465, ENSRNOG00000025787, ENSRNOG00000013069
CC	GO:0045335	phagocytic vesicle	10	0.00486198	0.132246	ENSRNOG00000059073, ENSRNOG00000014476, ENSRNOG00000003622, ENSRNOG00000037409, ENSRNOG00000048161, ENSRNOG00000000994, ENSRNOG00000003207, ENSRNOG00000019430, ENSRNOG00000031058, ENSRNOG00000007243
BP	GO:0008361	regulation of cell size	6	0.00489169	0.212116	ENSRNOG00000003232, ENSRNOG00000052348, ENSRNOG00000007422, ENSRNOG00000001839, ENSRNOG00000050430, ENSRNOG00000027894
BP	GO:0032757	positive regulation of interleukin-8 production	9	0.00506889	0.214439	ENSRNOG00000037908, ENSRNOG00000012160, ENSRNOG00000016434, ENSRNOG00000030093, ENSRNOG00000048161, ENSRNOG00000018735, ENSRNOG00000015082, ENSRNOG00000033685, ENSRNOG00000009342
BP	GO:0006958	complement activation, classical pathway	9	0.00506889	0.214439	ENSRNOG00000000053, ENSRNOG00000025990, ENSRNOG00000058590, ENSRNOG00000050000, ENSRNOG00000046834, ENSRNOG00000049870, ENSRNOG00000014312, ENSRNOG00000034190, ENSRNOG00000055169
BP	GO:0032496	response to lipopolysaccharide	22	0.00517279	0.215446	ENSRNOG00000008837, ENSRNOG00000000187, ENSRNOG00000004003, ENSRNOG00000010665, ENSRNOG00000039859, ENSRNOG00000033685, ENSRNOG00000051986, ENSRNOG00000004726, ENSRNOG00000017496, ENSRNOG00000051499, ENSRNOG00000019614, ENSRNOG00000020647, ENSRNOG00000016575, ENSRNOG00000009184, ENSRNOG00000020884, ENSRNOG00000007270, ENSRNOG00000019549, ENSRNOG00000052407, ENSRNOG00000008310, ENSRNOG00000020585,…
BP	GO:0010628	positive regulation of gene expression	39	0.0052169	0.215446	ENSRNOG00000000053, ENSRNOG00000009705, ENSRNOG00000002014, ENSRNOG00000004410, ENSRNOG00000007049, ENSRNOG00000011668, ENSRNOG00000039859, ENSRNOG00000007229, ENSRNOG00000000632, ENSRNOG00000001700, ENSRNOG00000051986, ENSRNOG00000017674, ENSRNOG00000052499, ENSRNOG00000011680, ENSRNOG00000015310, ENSRNOG00000018524, ENSRNOG00000019614, ENSRNOG00000016967, ENSRNOG00000016846, ENSRNOG00000023258,…
CC	GO:0001673	male germ cell nucleus	10	0.0052735	0.136609	ENSRNOG00000003123, ENSRNOG00000009271, ENSRNOG00000009789, ENSRNOG00000015810, ENSRNOG00000000488, ENSRNOG00000010386, ENSRNOG00000020804, ENSRNOG00000031387, ENSRNOG00000017674, ENSRNOG00000053047
MF	GO:0003785	actin monomer binding	6	0.00541826	0.142946	ENSRNOG00000018803, ENSRNOG00000048915, ENSRNOG00000015603, ENSRNOG00000019430, ENSRNOG00000050386, ENSRNOG00000055994
BP	GO:0042130	negative regulation of T cell proliferation	8	0.00591324	0.24133	ENSRNOG00000030246, ENSRNOG00000033215, ENSRNOG00000018804, ENSRNOG00000020699, ENSRNOG00000026039, ENSRNOG00000036711, ENSRNOG00000016041, ENSRNOG00000014294
CC	GO:0097197	tetraspanin-enriched microdomain	4	0.00612838	0.145947	ENSRNOG00000010813, ENSRNOG00000006418, ENSRNOG00000037409, ENSRNOG00000047204
CC	GO:0090543	Flemming body	6	0.00617054	0.145947	ENSRNOG00000013694, ENSRNOG00000016377, ENSRNOG00000017714, ENSRNOG00000023661, ENSRNOG00000025584, ENSRNOG00000011680
MF	GO:0016301	kinase activity	14	0.00619297	0.158717	ENSRNOG00000013309, ENSRNOG00000000632, ENSRNOG00000000811, ENSRNOG00000042411, ENSRNOG00000016846, ENSRNOG00000017737, ENSRNOG00000022943, ENSRNOG00000048915, ENSRNOG00000008180, ENSRNOG00000009258, ENSRNOG00000004160, ENSRNOG00000043201, ENSRNOG00000009385, ENSRNOG00000006695
BP	GO:0043507	positive regulation of JUN kinase activity	8	0.00654433	0.26398	ENSRNOG00000012160, ENSRNOG00000021061, ENSRNOG00000027839, ENSRNOG00000048161, ENSRNOG00000001138, ENSRNOG00000004639, ENSRNOG00000000528, ENSRNOG00000013177
BP	GO:0043410	positive regulation of MAPK cascade	17	0.00725062	0.289108	ENSRNOG00000032247, ENSRNOG00000033215, ENSRNOG00000048161, ENSRNOG00000012568, ENSRNOG00000034025, ENSRNOG00000000655, ENSRNOG00000014290, ENSRNOG00000051986, ENSRNOG00000005947, ENSRNOG00000012002, ENSRNOG00000011054, ENSRNOG00000013177, ENSRNOG00000020505, ENSRNOG00000012160, ENSRNOG00000018735, ENSRNOG00000015603, ENSRNOG00000027894
MF	GO:0003697	single-stranded DNA binding	12	0.00727181	0.181189	ENSRNOG00000003123, ENSRNOG00000015796, ENSRNOG00000006418, ENSRNOG00000003831, ENSRNOG00000003666, ENSRNOG00000034190, ENSRNOG00000014336, ENSRNOG00000019439, ENSRNOG00000051528, ENSRNOG00000011688, ENSRNOG00000003703, ENSRNOG00000012543
BP	GO:0045944	positive regulation of transcription from RNA polymerase II promoter	70	0.00734641	0.289599	ENSRNOG00000031930, ENSRNOG00000003661, ENSRNOG00000009205, ENSRNOG00000010557, ENSRNOG00000028845, ENSRNOG00000031778, ENSRNOG00000004639, ENSRNOG00000002217, ENSRNOG00000010312, ENSRNOG00000033433, ENSRNOG00000011762, ENSRNOG00000002659, ENSRNOG00000031058, ENSRNOG00000053047, ENSRNOG00000038881, ENSRNOG00000024729, ENSRNOG00000022868, ENSRNOG00000018803, ENSRNOG00000061070, ENSRNOG00000014644,…
CC	GO:0032420	stereocilium	7	0.00761575	0.157008	ENSRNOG00000003232, ENSRNOG00000018804, ENSRNOG00000048915, ENSRNOG00000001700, ENSRNOG00000033087, ENSRNOG00000007047, ENSRNOG00000003098
MF	GO:0005547	phosphatidylinositol-3,4,5-trisphosphate binding	7	0.00778359	0.18131	ENSRNOG00000030434, ENSRNOG00000059140, ENSRNOG00000049033, ENSRNOG00000056826, ENSRNOG00000004623, ENSRNOG00000052407, ENSRNOG00000012002
BP	GO:0046330	positive regulation of JNK cascade	11	0.00785324	0.3061	ENSRNOG00000059073, ENSRNOG00000021061, ENSRNOG00000027839, ENSRNOG00000001138, ENSRNOG00000005404, ENSRNOG00000007110, ENSRNOG00000004639, ENSRNOG00000046452, ENSRNOG00000021261, ENSRNOG00000033693, ENSRNOG00000013177
CC	GO:0005874	microtubule	21	0.00811865	0.157008	ENSRNOG00000003597, ENSRNOG00000004998, ENSRNOG00000012735, ENSRNOG00000046151, ENSRNOG00000019100, ENSRNOG00000017890, ENSRNOG00000017496, ENSRNOG00000012002, ENSRNOG00000011033, ENSRNOG00000011550, ENSRNOG00000058545, ENSRNOG00000018958, ENSRNOG00000016810, ENSRNOG00000020425, ENSRNOG00000032929, ENSRNOG00000007286, ENSRNOG00000008005, ENSRNOG00000026226, ENSRNOG00000008471, ENSRNOG00000005342,…
MF	GO:0008134	transcription factor binding	8	0.00817199	0.18131	ENSRNOG00000004158, ENSRNOG00000009271, ENSRNOG00000000488, ENSRNOG00000007229, ENSRNOG00000016519, ENSRNOG00000010708, ENSRNOG00000051499, ENSRNOG00000010680
CC	GO:0042101	T cell receptor complex	4	0.00817924	0.157008	ENSRNOG00000015994, ENSRNOG00000012160, ENSRNOG00000020884, ENSRNOG00000017803
CC	GO:0001931	uropod	4	0.00817924	0.157008	ENSRNOG00000018524, ENSRNOG00000000699, ENSRNOG00000036711, ENSRNOG00000003064
MF	GO:0004697	protein kinase C activity	4	0.00828732	0.18131	ENSRNOG00000012061, ENSRNOG00000015603, ENSRNOG00000054371, ENSRNOG00000004131
MF	GO:0004143	diacylglycerol kinase activity	4	0.00828732	0.18131	ENSRNOG00000001796, ENSRNOG00000017737, ENSRNOG00000023238, ENSRNOG00000022943
MF	GO:0042608	T cell receptor binding	4	0.00828732	0.18131	ENSRNOG00000032844, ENSRNOG00000009705, ENSRNOG00000033215, ENSRNOG00000006932
CC	GO:0005886	plasma membrane	209	0.00830321	0.157008	ENSRNOG00000031930, ENSRNOG00000000994, ENSRNOG00000005404, ENSRNOG00000003469, ENSRNOG00000054371, ENSRNOG00000019374, ENSRNOG00000000636, ENSRNOG00000017874, ENSRNOG00000059140, ENSRNOG00000019813, ENSRNOG00000013836, ENSRNOG00000007931, ENSRNOG00000000187, ENSRNOG00000052064, ENSRNOG00000006604, ENSRNOG00000010665, ENSRNOG00000032473, ENSRNOG00000057072, ENSRNOG00000028090, ENSRNOG00000016434,…
CC	GO:0005694	chromosome	16	0.00841924	0.157008	ENSRNOG00000024073, ENSRNOG00000005659, ENSRNOG00000009789, ENSRNOG00000003689, ENSRNOG00000003703, ENSRNOG00000012543, ENSRNOG00000010386, ENSRNOG00000022868, ENSRNOG00000015796, ENSRNOG00000012051, ENSRNOG00000014336, ENSRNOG00000015810, ENSRNOG00000051615, ENSRNOG00000060355, ENSRNOG00000004263, ENSRNOG00000025672
CC	GO:0032426	stereocilium tip	5	0.00870919	0.157008	ENSRNOG00000003232, ENSRNOG00000001700, ENSRNOG00000019430, ENSRNOG00000033087, ENSRNOG00000007047
CC	GO:0019815	B cell receptor complex	3	0.00901698	0.157008	ENSRNOG00000012160, ENSRNOG00000020125, ENSRNOG00000011917
BP	GO:0043408	regulation of MAPK cascade	7	0.00921938	0.337107	ENSRNOG00000002599, ENSRNOG00000000321, ENSRNOG00000019271, ENSRNOG00000007925, ENSRNOG00000001138, ENSRNOG00000014290, ENSRNOG00000013529
CC	GO:0005925	focal adhesion	16	0.00923576	0.157008	ENSRNOG00000022071, ENSRNOG00000056714, ENSRNOG00000003476, ENSRNOG00000052064, ENSRNOG00000012208, ENSRNOG00000001224, ENSRNOG00000000655, ENSRNOG00000002538, ENSRNOG00000012002, ENSRNOG00000011680, ENSRNOG00000018524, ENSRNOG00000014476, ENSRNOG00000027839, ENSRNOG00000013920, ENSRNOG00000008444, ENSRNOG00000009331
BP	GO:0030261	chromosome condensation	5	0.00925061	0.337107	ENSRNOG00000048264, ENSRNOG00000000632, ENSRNOG00000047459, ENSRNOG00000060355, ENSRNOG00000053047
BP	GO:0032695	negative regulation of interleukin-12 production	5	0.00925061	0.337107	ENSRNOG00000059073, ENSRNOG00000010665, ENSRNOG00000018669, ENSRNOG00000023258, ENSRNOG00000024210
BP	GO:0007596	blood coagulation	9	0.0092739	0.337107	ENSRNOG00000038540, ENSRNOG00000048472, ENSRNOG00000057855, ENSRNOG00000046834, ENSRNOG00000019689, ENSRNOG00000018054, ENSRNOG00000034025, ENSRNOG00000026039, ENSRNOG00000052499
BP	GO:0050855	regulation of B cell receptor signaling pathway	3	0.00932899	0.337107	ENSRNOG00000010798, ENSRNOG00000008180, ENSRNOG00000018311
BP	GO:0033632	regulation of cell-cell adhesion mediated by integrin	3	0.00932899	0.337107	ENSRNOG00000021161, ENSRNOG00000030763, ENSRNOG00000000321
BP	GO:0071226	cellular response to molecule of fungal origin	3	0.00932899	0.337107	ENSRNOG00000012160, ENSRNOG00000037409, ENSRNOG00000052407
BP	GO:0090630	activation of GTPase activity	11	0.00958194	0.339181	ENSRNOG00000008737, ENSRNOG00000020726, ENSRNOG00000027839, ENSRNOG00000006327, ENSRNOG00000005404, ENSRNOG00000002180, ENSRNOG00000021510, ENSRNOG00000009347, ENSRNOG00000020393, ENSRNOG00000025584, ENSRNOG00000013220
BP	GO:0050729	positive regulation of inflammatory response	11	0.00958194	0.339181	ENSRNOG00000000583, ENSRNOG00000008941, ENSRNOG00000048161, ENSRNOG00000018735, ENSRNOG00000052407, ENSRNOG00000015082, ENSRNOG00000017749, ENSRNOG00000019560, ENSRNOG00000011153, ENSRNOG00000011680, ENSRNOG00000023143
CC	GO:0000785	chromatin	27	0.00995318	0.164077	ENSRNOG00000006137, ENSRNOG00000004410, ENSRNOG00000009722, ENSRNOG00000011523, ENSRNOG00000007229, ENSRNOG00000038140, ENSRNOG00000019813, ENSRNOG00000017714, ENSRNOG00000051615, ENSRNOG00000013615, ENSRNOG00000010708, ENSRNOG00000048411, ENSRNOG00000005115, ENSRNOG00000001692, ENSRNOG00000048264, ENSRNOG00000006048, ENSRNOG00000012942, ENSRNOG00000050106, ENSRNOG00000010386, ENSRNOG00000051499,…
BP	GO:0042832	defense response to protozoan	6	0.0100034	0.347019	ENSRNOG00000061070, ENSRNOG00000020699, ENSRNOG00000017869, ENSRNOG00000017749, ENSRNOG00000026039, ENSRNOG00000015441
BP	GO:0006284	base-excision repair	6	0.0100034	0.347019	ENSRNOG00000003123, ENSRNOG00000018577, ENSRNOG00000000488, ENSRNOG00000011688, ENSRNOG00000003084, ENSRNOG00000014193
BP	GO:0009636	response to toxic substance	12	0.0107714	0.369959	ENSRNOG00000008837, ENSRNOG00000010625, ENSRNOG00000003476, ENSRNOG00000009031, ENSRNOG00000039859, ENSRNOG00000008180, ENSRNOG00000000632, ENSRNOG00000054371, ENSRNOG00000002327, ENSRNOG00000018086, ENSRNOG00000017496, ENSRNOG00000059997
BP	GO:0045577	regulation of B cell differentiation	4	0.011103	0.377612	ENSRNOG00000000321, ENSRNOG00000048161, ENSRNOG00000014294, ENSRNOG00000007200
BP	GO:0006952	defense response	7	0.0113556	0.382452	ENSRNOG00000003622, ENSRNOG00000018735, ENSRNOG00000016490, ENSRNOG00000028707, ENSRNOG00000046452, ENSRNOG00000020300, ENSRNOG00000024330
MF	GO:0003678	DNA helicase activity	7	0.0118326	0.25067	ENSRNOG00000014434, ENSRNOG00000009722, ENSRNOG00000014336, ENSRNOG00000051528, ENSRNOG00000003703, ENSRNOG00000012543, ENSRNOG00000059997
MF	GO:0043027	cysteine-type endopeptidase inhibitor activity involved in apoptotic process	5	0.012296	0.25067	ENSRNOG00000005731, ENSRNOG00000042411, ENSRNOG00000018958, ENSRNOG00000026136, ENSRNOG00000033693
MF	GO:0017116	single-stranded DNA-dependent ATP-dependent DNA helicase activity	5	0.012296	0.25067	ENSRNOG00000001134, ENSRNOG00000014336, ENSRNOG00000001457, ENSRNOG00000003703, ENSRNOG00000012543
BP	GO:0008045	motor neuron axon guidance	6	0.012806	0.427154	ENSRNOG00000002540, ENSRNOG00000003595, ENSRNOG00000009184, ENSRNOG00000003866, ENSRNOG00000007350, ENSRNOG00000020393
BP	GO:0045766	positive regulation of angiogenesis	15	0.0131914	0.428153	ENSRNOG00000031930, ENSRNOG00000003622, ENSRNOG00000008941, ENSRNOG00000001224, ENSRNOG00000012556, ENSRNOG00000046834, ENSRNOG00000016434, ENSRNOG00000012061, ENSRNOG00000027839, ENSRNOG00000016846, ENSRNOG00000020425, ENSRNOG00000009465, ENSRNOG00000020585, ENSRNOG00000010708, ENSRNOG00000004284
BP	GO:0033077	T cell differentiation in thymus	7	0.0138192	0.428153	ENSRNOG00000004630, ENSRNOG00000003954, ENSRNOG00000004623, ENSRNOG00000009258, ENSRNOG00000014605, ENSRNOG00000051499, ENSRNOG00000025111
CC	GO:0030141	secretory granule	13	0.0139718	0.22355	ENSRNOG00000026650, ENSRNOG00000000394, ENSRNOG00000061527, ENSRNOG00000000994, ENSRNOG00000033685, ENSRNOG00000017890, ENSRNOG00000005825, ENSRNOG00000052499, ENSRNOG00000020647, ENSRNOG00000030093, ENSRNOG00000008310, ENSRNOG00000001173, ENSRNOG00000008001
BP	GO:0032725	positive regulation of granulocyte macrophage colony-stimulating factor production	4	0.0140049	0.428153	ENSRNOG00000012160, ENSRNOG00000048161, ENSRNOG00000005404, ENSRNOG00000012556
BP	GO:0016446	somatic hypermutation of immunoglobulin genes	4	0.0140049	0.428153	ENSRNOG00000018238, ENSRNOG00000015796, ENSRNOG00000006418, ENSRNOG00000013647
BP	GO:0046339	diacylglycerol metabolic process	4	0.0140049	0.428153	ENSRNOG00000001796, ENSRNOG00000017737, ENSRNOG00000023238, ENSRNOG00000022943
BP	GO:0061351	neural precursor cell proliferation	6	0.014388	0.428153	ENSRNOG00000022868, ENSRNOG00000001276, ENSRNOG00000004410, ENSRNOG00000013598, ENSRNOG00000014963, ENSRNOG00000003866
BP	GO:0043029	T cell homeostasis	6	0.014388	0.428153	ENSRNOG00000036829, ENSRNOG00000004630, ENSRNOG00000018669, ENSRNOG00000021546, ENSRNOG00000019430, ENSRNOG00000032970
BP	GO:0043303	mast cell degranulation	5	0.0149229	0.428153	ENSRNOG00000042524, ENSRNOG00000012160, ENSRNOG00000005404, ENSRNOG00000016999, ENSRNOG00000008444
BP	GO:0035855	megakaryocyte development	5	0.0149229	0.428153	ENSRNOG00000038540, ENSRNOG00000009805, ENSRNOG00000008904, ENSRNOG00000014294, ENSRNOG00000028198
CC	GO:0030426	growth cone	15	0.0150184	0.23343	ENSRNOG00000000053, ENSRNOG00000027992, ENSRNOG00000011705, ENSRNOG00000006604, ENSRNOG00000003866, ENSRNOG00000001700, ENSRNOG00000001427, ENSRNOG00000012002, ENSRNOG00000058545, ENSRNOG00000027839, ENSRNOG00000048915, ENSRNOG00000020425, ENSRNOG00000008444, ENSRNOG00000008471, ENSRNOG00000007047
BP	GO:0032831	positive regulation of CD4-positive, CD25-positive, alpha-beta regulatory T cell differentiation	3	0.015132	0.428153	ENSRNOG00000032844, ENSRNOG00000033215, ENSRNOG00000003954
BP	GO:0006297	nucleotide-excision repair, DNA gap filling	3	0.015132	0.428153	ENSRNOG00000037449, ENSRNOG00000014605, ENSRNOG00000019681
BP	GO:0045622	regulation of T-helper cell differentiation	3	0.015132	0.428153	ENSRNOG00000032844, ENSRNOG00000033215, ENSRNOG00000007270
BP	GO:0002768	immune response-regulating cell surface receptor signaling pathway	3	0.015132	0.428153	ENSRNOG00000030246, ENSRNOG00000008180, ENSRNOG00000050430
BP	GO:1902622	regulation of neutrophil migration	3	0.015132	0.428153	ENSRNOG00000002540, ENSRNOG00000007350, ENSRNOG00000020393
BP	GO:0002576	platelet degranulation	3	0.015132	0.428153	ENSRNOG00000005214, ENSRNOG00000010798, ENSRNOG00000008180
BP	GO:0034154	toll-like receptor 7 signaling pathway	3	0.015132	0.428153	ENSRNOG00000013309, ENSRNOG00000037409, ENSRNOG00000017703
BP	GO:0050849	negative regulation of calcium-mediated signaling	3	0.015132	0.428153	ENSRNOG00000020337, ENSRNOG00000037339, ENSRNOG00000024000
BP	GO:0002377	immunoglobulin production	3	0.015132	0.428153	ENSRNOG00000047571, ENSRNOG00000052348, ENSRNOG00000001839
BP	GO:0006910	phagocytosis, recognition	7	0.015181	0.428153	ENSRNOG00000025990, ENSRNOG00000058590, ENSRNOG00000050000, ENSRNOG00000049870, ENSRNOG00000014312, ENSRNOG00000034190, ENSRNOG00000055169
MF	GO:0005154	epidermal growth factor receptor binding	6	0.0153067	0.29848	ENSRNOG00000020945, ENSRNOG00000002599, ENSRNOG00000004405, ENSRNOG00000019093, ENSRNOG00000008444, ENSRNOG00000007422
MF	GO:0005246	calcium channel regulator activity	6	0.0153067	0.29848	ENSRNOG00000012061, ENSRNOG00000020425, ENSRNOG00000005662, ENSRNOG00000047574, ENSRNOG00000001173, ENSRNOG00000022044
MF	GO:0005044	scavenger receptor activity	7	0.0157088	0.299804	ENSRNOG00000026650, ENSRNOG00000001165, ENSRNOG00000020884, ENSRNOG00000036647, ENSRNOG00000020872, ENSRNOG00000034230, ENSRNOG00000016164
BP	GO:0006281	DNA repair	16	0.0158187	0.439001	ENSRNOG00000003123, ENSRNOG00000004158, ENSRNOG00000001134, ENSRNOG00000003831, ENSRNOG00000001457, ENSRNOG00000003689, ENSRNOG00000001138, ENSRNOG00000014193, ENSRNOG00000010386, ENSRNOG00000061085, ENSRNOG00000015796, ENSRNOG00000018577, ENSRNOG00000016689, ENSRNOG00000017714, ENSRNOG00000014605, ENSRNOG00000048411
BP	GO:0051649	establishment of localization in cell	16	0.0158187	0.439001	ENSRNOG00000003232, ENSRNOG00000019271, ENSRNOG00000008138, ENSRNOG00000007439, ENSRNOG00000032473, ENSRNOG00000001700, ENSRNOG00000019430, ENSRNOG00000059140, ENSRNOG00000012160, ENSRNOG00000020425, ENSRNOG00000015603, ENSRNOG00000008552, ENSRNOG00000017606, ENSRNOG00000025787, ENSRNOG00000046452, ENSRNOG00000006410
BP	GO:0071222	cellular response to lipopolysaccharide	21	0.0160017	0.440555	ENSRNOG00000008837, ENSRNOG00000000583, ENSRNOG00000002014, ENSRNOG00000048161, ENSRNOG00000017181, ENSRNOG00000004639, ENSRNOG00000028707, ENSRNOG00000019560, ENSRNOG00000034164, ENSRNOG00000032353, ENSRNOG00000018238, ENSRNOG00000020647, ENSRNOG00000016575, ENSRNOG00000034195, ENSRNOG00000019689, ENSRNOG00000030093, ENSRNOG00000017869, ENSRNOG00000023258, ENSRNOG00000020585, ENSRNOG00000046452,…
BP	GO:0050829	defense response to Gram-negative bacterium	10	0.0168899	0.451121	ENSRNOG00000033538, ENSRNOG00000020647, ENSRNOG00000034195, ENSRNOG00000034190, ENSRNOG00000030093, ENSRNOG00000048161, ENSRNOG00000015082, ENSRNOG00000036897, ENSRNOG00000028707, ENSRNOG00000005825
BP	GO:0000082	G1/S transition of mitotic cell cycle	8	0.0171725	0.451121	ENSRNOG00000006048, ENSRNOG00000055858, ENSRNOG00000011589, ENSRNOG00000050106, ENSRNOG00000037449, ENSRNOG00000050258, ENSRNOG00000013914, ENSRNOG00000027894
BP	GO:0050850	positive regulation of calcium-mediated signaling	5	0.0172086	0.451121	ENSRNOG00000012160, ENSRNOG00000016712, ENSRNOG00000000321, ENSRNOG00000051986, ENSRNOG00000017980
BP	GO:0050868	negative regulation of T cell activation	5	0.0172086	0.451121	ENSRNOG00000020647, ENSRNOG00000019614, ENSRNOG00000018669, ENSRNOG00000036711, ENSRNOG00000011054
BP	GO:0002224	toll-like receptor signaling pathway	5	0.0172086	0.451121	ENSRNOG00000042455, ENSRNOG00000048161, ENSRNOG00000017703, ENSRNOG00000051986, ENSRNOG00000004726
CC	GO:0001726	ruffle	10	0.0172292	0.256484	ENSRNOG00000018524, ENSRNOG00000003232, ENSRNOG00000009805, ENSRNOG00000037409, ENSRNOG00000049361, ENSRNOG00000009258, ENSRNOG00000012378, ENSRNOG00000012002, ENSRNOG00000000528, ENSRNOG00000024452
BP	GO:0050798	activated T cell proliferation	4	0.0172958	0.451121	ENSRNOG00000014367, ENSRNOG00000001224, ENSRNOG00000012942, ENSRNOG00000017980
BP	GO:0030098	lymphocyte differentiation	4	0.0172958	0.451121	ENSRNOG00000004444, ENSRNOG00000054764, ENSRNOG00000003954, ENSRNOG00000051499
MF	GO:0005102	receptor binding	25	0.0174976	0.326986	ENSRNOG00000006831, ENSRNOG00000009705, ENSRNOG00000056714, ENSRNOG00000013309, ENSRNOG00000030763, ENSRNOG00000032247, ENSRNOG00000019093, ENSRNOG00000029814, ENSRNOG00000010798, ENSRNOG00000000655, ENSRNOG00000027839, ENSRNOG00000016967, ENSRNOG00000003581, ENSRNOG00000008153, ENSRNOG00000009342, ENSRNOG00000028541, ENSRNOG00000003232, ENSRNOG00000001377, ENSRNOG00000009912, ENSRNOG00000011153,…
CC	GO:0030027	lamellipodium	15	0.0178088	0.256484	ENSRNOG00000011705, ENSRNOG00000009805, ENSRNOG00000030763, ENSRNOG00000000994, ENSRNOG00000019430, ENSRNOG00000012378, ENSRNOG00000000869, ENSRNOG00000059140, ENSRNOG00000014476, ENSRNOG00000025209, ENSRNOG00000027839, ENSRNOG00000017737, ENSRNOG00000048915, ENSRNOG00000007350, ENSRNOG00000024452
CC	GO:0000794	condensed nuclear chromosome	7	0.0183519	0.256484	ENSRNOG00000003123, ENSRNOG00000012051, ENSRNOG00000009789, ENSRNOG00000050106, ENSRNOG00000012820, ENSRNOG00000010386, ENSRNOG00000025672
BP	GO:0045892	negative regulation of transcription, DNA-templated	37	0.0183671	0.475271	ENSRNOG00000004158, ENSRNOG00000006831, ENSRNOG00000003661, ENSRNOG00000003069, ENSRNOG00000011668, ENSRNOG00000039859, ENSRNOG00000003689, ENSRNOG00000007229, ENSRNOG00000004639, ENSRNOG00000014061, ENSRNOG00000002659, ENSRNOG00000017674, ENSRNOG00000009184, ENSRNOG00000034240, ENSRNOG00000013850, ENSRNOG00000014723, ENSRNOG00000019913, ENSRNOG00000023258, ENSRNOG00000009465, ENSRNOG00000003581,…
BP	GO:0006935	chemotaxis	8	0.0185277	0.475271	ENSRNOG00000046834, ENSRNOG00000036829, ENSRNOG00000018804, ENSRNOG00000003866, ENSRNOG00000010665, ENSRNOG00000006932, ENSRNOG00000007350, ENSRNOG00000020300
BP	GO:0042981	regulation of apoptotic process	14	0.0186327	0.475271	ENSRNOG00000005731, ENSRNOG00000008941, ENSRNOG00000012439, ENSRNOG00000017181, ENSRNOG00000012568, ENSRNOG00000004639, ENSRNOG00000033693, ENSRNOG00000018669, ENSRNOG00000009465, ENSRNOG00000016707, ENSRNOG00000005342, ENSRNOG00000021261, ENSRNOG00000007200, ENSRNOG00000023143
MF	GO:0042802	identical protein binding	94	0.0190276	0.343014	ENSRNOG00000008837, ENSRNOG00000013309, ENSRNOG00000030763, ENSRNOG00000003069, ENSRNOG00000004630, ENSRNOG00000006418, ENSRNOG00000012735, ENSRNOG00000005404, ENSRNOG00000019374, ENSRNOG00000004639, ENSRNOG00000003703, ENSRNOG00000056596, ENSRNOG00000059344, ENSRNOG00000031058, ENSRNOG00000017751, ENSRNOG00000018524, ENSRNOG00000017874, ENSRNOG00000020884, ENSRNOG00000020125, ENSRNOG00000045949,…
MF	GO:0043621	protein self-association	9	0.0191201	0.343014	ENSRNOG00000054764, ENSRNOG00000003232, ENSRNOG00000017777, ENSRNOG00000009184, ENSRNOG00000002278, ENSRNOG00000027839, ENSRNOG00000017181, ENSRNOG00000004482, ENSRNOG00000023143
BP	GO:0043406	positive regulation of MAP kinase activity	9	0.0191812	0.48569	ENSRNOG00000005883, ENSRNOG00000006048, ENSRNOG00000000321, ENSRNOG00000005404, ENSRNOG00000000655, ENSRNOG00000019374, ENSRNOG00000012002, ENSRNOG00000009385, ENSRNOG00000013177
BP	GO:0038083	peptidyl-tyrosine autophosphorylation	5	0.019701	0.489705	ENSRNOG00000009705, ENSRNOG00000002278, ENSRNOG00000027839, ENSRNOG00000052407, ENSRNOG00000004392
BP	GO:0042493	response to drug	32	0.0197399	0.489705	ENSRNOG00000009705, ENSRNOG00000008837, ENSRNOG00000003069, ENSRNOG00000036829, ENSRNOG00000003622, ENSRNOG00000039859, ENSRNOG00000000632, ENSRNOG00000056596, ENSRNOG00000053047, ENSRNOG00000015796, ENSRNOG00000013774, ENSRNOG00000027839, ENSRNOG00000023258, ENSRNOG00000009465, ENSRNOG00000052070, ENSRNOG00000020585, ENSRNOG00000010708, ENSRNOG00000007243, ENSRNOG00000020263, ENSRNOG00000010625,…
BP	GO:0035335	peptidyl-tyrosine dephosphorylation	6	0.0199044	0.489705	ENSRNOG00000019614, ENSRNOG00000004003, ENSRNOG00000013862, ENSRNOG00000034025, ENSRNOG00000014061, ENSRNOG00000014294
BP	GO:0051924	regulation of calcium ion transport	6	0.0199044	0.489705	ENSRNOG00000003633, ENSRNOG00000003866, ENSRNOG00000020425, ENSRNOG00000017606, ENSRNOG00000011133, ENSRNOG00000011680
CC	GO:0071565	nBAF complex	4	0.0200347	0.256484	ENSRNOG00000009271, ENSRNOG00000006137, ENSRNOG00000017030, ENSRNOG00000020804
MF	GO:0016740	transferase activity	7	0.0203847	0.35614	ENSRNOG00000005731, ENSRNOG00000024461, ENSRNOG00000003069, ENSRNOG00000001138, ENSRNOG00000003064, ENSRNOG00000006695, ENSRNOG00000048411
CC	GO:0000228	nuclear chromosome	6	0.0205835	0.256484	ENSRNOG00000006732, ENSRNOG00000054017, ENSRNOG00000014434, ENSRNOG00000051948, ENSRNOG00000011523, ENSRNOG00000053047
MF	GO:0051015	actin filament binding	17	0.0206458	0.35614	ENSRNOG00000003476, ENSRNOG00000008409, ENSRNOG00000049361, ENSRNOG00000031855, ENSRNOG00000056297, ENSRNOG00000012820, ENSRNOG00000003207, ENSRNOG00000019430, ENSRNOG00000012378, ENSRNOG00000012002, ENSRNOG00000038881, ENSRNOG00000018524, ENSRNOG00000059140, ENSRNOG00000048915, ENSRNOG00000014317, ENSRNOG00000003283, ENSRNOG00000027894
BP	GO:0045579	positive regulation of B cell differentiation	4	0.02098	0.508948	ENSRNOG00000036829, ENSRNOG00000012160, ENSRNOG00000003954, ENSRNOG00000017020
BP	GO:0006349	regulation of gene expression by genetic imprinting	4	0.02098	0.508948	ENSRNOG00000010625, ENSRNOG00000016519, ENSRNOG00000028661, ENSRNOG00000017674
MF	GO:0019900	kinase binding	11	0.0211543	0.358026	ENSRNOG00000019614, ENSRNOG00000006622, ENSRNOG00000000068, ENSRNOG00000004998, ENSRNOG00000005659, ENSRNOG00000023238, ENSRNOG00000022635, ENSRNOG00000021546, ENSRNOG00000006410, ENSRNOG00000007387, ENSRNOG00000013000
CC	GO:0032587	ruffle membrane	9	0.0212035	0.256484	ENSRNOG00000005214, ENSRNOG00000018524, ENSRNOG00000009912, ENSRNOG00000034025, ENSRNOG00000051986, ENSRNOG00000002538, ENSRNOG00000007047, ENSRNOG00000006079, ENSRNOG00000021098
CC	GO:0032133	chromosome passenger complex	3	0.0213735	0.256484	ENSRNOG00000005659, ENSRNOG00000032929, ENSRNOG00000031431
CC	GO:0033093	Weibel-Palade body	3	0.0213735	0.256484	ENSRNOG00000019689, ENSRNOG00000007439, ENSRNOG00000052499
CC	GO:0042105	alpha-beta T cell receptor complex	3	0.0213735	0.256484	ENSRNOG00000015994, ENSRNOG00000015945, ENSRNOG00000014294
CC	GO:0030427	site of polarized growth	3	0.0213735	0.256484	ENSRNOG00000038881, ENSRNOG00000002248, ENSRNOG00000012378
BP	GO:0070374	positive regulation of ERK1 and ERK2 cascade	18	0.0215154	0.518313	ENSRNOG00000033215, ENSRNOG00000037409, ENSRNOG00000003866, ENSRNOG00000011589, ENSRNOG00000005404, ENSRNOG00000000655, ENSRNOG00000018078, ENSRNOG00000059073, ENSRNOG00000019614, ENSRNOG00000016278, ENSRNOG00000046834, ENSRNOG00000015863, ENSRNOG00000016434, ENSRNOG00000027839, ENSRNOG00000018958, ENSRNOG00000019549, ENSRNOG00000018735, ENSRNOG00000010708
CC	GO:0000775	chromosome, centromeric region	7	0.021688	0.256484	ENSRNOG00000010625, ENSRNOG00000005659, ENSRNOG00000032929, ENSRNOG00000019100, ENSRNOG00000031431, ENSRNOG00000017674, ENSRNOG00000053047
BP	GO:0051573	negative regulation of histone H3-K9 methylation	3	0.0220922	0.524918	ENSRNOG00000024729, ENSRNOG00000010625, ENSRNOG00000039859
BP	GO:2000670	positive regulation of dendritic cell apoptotic process	3	0.0220922	0.524918	ENSRNOG00000018669, ENSRNOG00000010798, ENSRNOG00000008180
BP	GO:0031295	T cell costimulation	5	0.0224048	0.528722	ENSRNOG00000030763, ENSRNOG00000000321, ENSRNOG00000036711, ENSRNOG00000020872, ENSRNOG00000007664
BP	GO:0006974	cellular response to DNA damage stimulus	20	0.0228775	0.536231	ENSRNOG00000003123, ENSRNOG00000006418, ENSRNOG00000009789, ENSRNOG00000001138, ENSRNOG00000010798, ENSRNOG00000004639, ENSRNOG00000010386, ENSRNOG00000004726, ENSRNOG00000013397, ENSRNOG00000053047, ENSRNOG00000018238, ENSRNOG00000061085, ENSRNOG00000009184, ENSRNOG00000015796, ENSRNOG00000026408, ENSRNOG00000051528, ENSRNOG00000008180, ENSRNOG00000003084, ENSRNOG00000008444, ENSRNOG00000005274
MF	GO:0005515	protein binding	86	0.0232111	0.385562	ENSRNOG00000003661, ENSRNOG00000011803, ENSRNOG00000003622, ENSRNOG00000000994, ENSRNOG00000039859, ENSRNOG00000052391, ENSRNOG00000000632, ENSRNOG00000031778, ENSRNOG00000019374, ENSRNOG00000054371, ENSRNOG00000051986, ENSRNOG00000018524, ENSRNOG00000046834, ENSRNOG00000020884, ENSRNOG00000027839, ENSRNOG00000045949, ENSRNOG00000016707, ENSRNOG00000026226, ENSRNOG00000006410, ENSRNOG00000006695,…
BP	GO:0050776	regulation of immune response	7	0.0233946	0.54467	ENSRNOG00000012160, ENSRNOG00000037339, ENSRNOG00000046452, ENSRNOG00000017020, ENSRNOG00000036711, ENSRNOG00000007664, ENSRNOG00000024000
BP	GO:0019221	cytokine-mediated signaling pathway	12	0.0237162	0.546115	ENSRNOG00000054764, ENSRNOG00000007437, ENSRNOG00000015773, ENSRNOG00000000187, ENSRNOG00000007270, ENSRNOG00000018669, ENSRNOG00000003954, ENSRNOG00000005954, ENSRNOG00000004639, ENSRNOG00000032948, ENSRNOG00000011680, ENSRNOG00000015441
MF	GO:0016791	phosphatase activity	7	0.0239784	0.391066	ENSRNOG00000019614, ENSRNOG00000004003, ENSRNOG00000019813, ENSRNOG00000034025, ENSRNOG00000014061, ENSRNOG00000017020, ENSRNOG00000052887
BP	GO:0003281	ventricular septum development	6	0.0242591	0.546115	ENSRNOG00000009271, ENSRNOG00000009205, ENSRNOG00000003866, ENSRNOG00000022015, ENSRNOG00000019560, ENSRNOG00000010708
BP	GO:0043087	regulation of GTPase activity	9	0.0247235	0.546115	ENSRNOG00000025209, ENSRNOG00000031168, ENSRNOG00000012002, ENSRNOG00000007422, ENSRNOG00000006167, ENSRNOG00000017671, ENSRNOG00000007970, ENSRNOG00000050430, ENSRNOG00000027894
MF	GO:0005518	collagen binding	8	0.0248754	0.398451	ENSRNOG00000038540, ENSRNOG00000000394, ENSRNOG00000048472, ENSRNOG00000030763, ENSRNOG00000019689, ENSRNOG00000014963, ENSRNOG00000014290, ENSRNOG00000047204
BP	GO:0043652	engulfment of apoptotic cell	4	0.0250592	0.546115	ENSRNOG00000002540, ENSRNOG00000028636, ENSRNOG00000007350, ENSRNOG00000020393
BP	GO:0016584	nucleosome positioning	4	0.0250592	0.546115	ENSRNOG00000048264, ENSRNOG00000047459, ENSRNOG00000060355, ENSRNOG00000017674
BP	GO:0006337	nucleosome disassembly	4	0.0250592	0.546115	ENSRNOG00000009271, ENSRNOG00000006137, ENSRNOG00000010557, ENSRNOG00000020804
BP	GO:0097028	dendritic cell differentiation	4	0.0250592	0.546115	ENSRNOG00000054764, ENSRNOG00000017869, ENSRNOG00000010798, ENSRNOG00000008180
BP	GO:0050778	positive regulation of immune response	4	0.0250592	0.546115	ENSRNOG00000032844, ENSRNOG00000020647, ENSRNOG00000012160, ENSRNOG00000033685
BP	GO:0071897	DNA biosynthetic process	5	0.0253236	0.546115	ENSRNOG00000037449, ENSRNOG00000013615, ENSRNOG00000014193, ENSRNOG00000014605, ENSRNOG00000019681
BP	GO:0032753	positive regulation of interleukin-4 production	5	0.0253236	0.546115	ENSRNOG00000012160, ENSRNOG00000061070, ENSRNOG00000004409, ENSRNOG00000008707, ENSRNOG00000008394
BP	GO:0090023	positive regulation of neutrophil chemotaxis	5	0.0253236	0.546115	ENSRNOG00000036829, ENSRNOG00000018804, ENSRNOG00000010665, ENSRNOG00000018735, ENSRNOG00000007350
BP	GO:0050731	positive regulation of peptidyl-tyrosine phosphorylation	11	0.0253458	0.546115	ENSRNOG00000038881, ENSRNOG00000002278, ENSRNOG00000012160, ENSRNOG00000032247, ENSRNOG00000027839, ENSRNOG00000000321, ENSRNOG00000006604, ENSRNOG00000018735, ENSRNOG00000000655, ENSRNOG00000034025, ENSRNOG00000051986
MF	GO:0042169	SH2 domain binding	6	0.0253948	0.399634	ENSRNOG00000059073, ENSRNOG00000009705, ENSRNOG00000012160, ENSRNOG00000037339, ENSRNOG00000013967, ENSRNOG00000014294
BP	GO:0030900	forebrain development	10	0.0267976	0.573832	ENSRNOG00000004444, ENSRNOG00000009271, ENSRNOG00000009184, ENSRNOG00000006137, ENSRNOG00000004410, ENSRNOG00000018803, ENSRNOG00000014644, ENSRNOG00000025702, ENSRNOG00000017496, ENSRNOG00000016595
CC	GO:0001891	phagocytic cup	5	0.026911	0.31148	ENSRNOG00000059140, ENSRNOG00000031930, ENSRNOG00000042449, ENSRNOG00000019430, ENSRNOG00000009347
BP	GO:0007162	negative regulation of cell adhesion	7	0.0273798	0.581335	ENSRNOG00000027992, ENSRNOG00000019128, ENSRNOG00000008409, ENSRNOG00000025209, ENSRNOG00000018804, ENSRNOG00000036711, ENSRNOG00000007970
BP	GO:0009410	response to xenobiotic stimulus	32	0.0274831	0.581335	ENSRNOG00000009705, ENSRNOG00000008837, ENSRNOG00000003069, ENSRNOG00000036829, ENSRNOG00000003622, ENSRNOG00000039859, ENSRNOG00000000632, ENSRNOG00000056596, ENSRNOG00000053047, ENSRNOG00000015796, ENSRNOG00000013774, ENSRNOG00000027839, ENSRNOG00000023258, ENSRNOG00000009465, ENSRNOG00000052070, ENSRNOG00000020585, ENSRNOG00000010708, ENSRNOG00000007243, ENSRNOG00000020263, ENSRNOG00000010625,…
MF	GO:0030527	structural constituent of chromatin	7	0.027973	0.432616	ENSRNOG00000005115, ENSRNOG00000054017, ENSRNOG00000048264, ENSRNOG00000011523, ENSRNOG00000010386, ENSRNOG00000047459, ENSRNOG00000060355
BP	GO:0043552	positive regulation of phosphatidylinositol 3-kinase activity	5	0.0284607	0.598364	ENSRNOG00000027839, ENSRNOG00000009912, ENSRNOG00000008180, ENSRNOG00000018311, ENSRNOG00000007422
CC	GO:0099091	postsynaptic specialization, intracellular component	3	0.0291408	0.330263	ENSRNOG00000000394, ENSRNOG00000009705, ENSRNOG00000008180
BP	GO:0001817	regulation of cytokine production	6	0.0291831	0.60721	ENSRNOG00000001167, ENSRNOG00000048161, ENSRNOG00000008180, ENSRNOG00000011762, ENSRNOG00000012002, ENSRNOG00000028541
BP	GO:0060100	positive regulation of phagocytosis, engulfment	4	0.0295327	0.60721	ENSRNOG00000002014, ENSRNOG00000046834, ENSRNOG00000036829, ENSRNOG00000051986
BP	GO:0045088	regulation of innate immune response	4	0.0295327	0.60721	ENSRNOG00000008409, ENSRNOG00000004003, ENSRNOG00000006418, ENSRNOG00000009912
CC	GO:0005721	pericentric heterochromatin	5	0.0301018	0.334191	ENSRNOG00000004444, ENSRNOG00000006048, ENSRNOG00000039859, ENSRNOG00000011523, ENSRNOG00000032929
BP	GO:0034162	toll-like receptor 9 signaling pathway	3	0.0301067	0.60721	ENSRNOG00000013309, ENSRNOG00000048161, ENSRNOG00000017703
BP	GO:1904044	response to aldosterone	3	0.0301067	0.60721	ENSRNOG00000057072, ENSRNOG00000003622, ENSRNOG00000003084
BP	GO:0045621	positive regulation of lymphocyte differentiation	3	0.0301067	0.60721	ENSRNOG00000036829, ENSRNOG00000003954, ENSRNOG00000017020
BP	GO:0006266	DNA ligation	3	0.0301067	0.60721	ENSRNOG00000014193, ENSRNOG00000014605, ENSRNOG00000053047
MF	GO:0019955	cytokine binding	6	0.0303905	0.462038	ENSRNOG00000007270, ENSRNOG00000003866, ENSRNOG00000003954, ENSRNOG00000018735, ENSRNOG00000005954, ENSRNOG00000033685
BP	GO:0030517	negative regulation of axon extension	5	0.0318183	0.638022	ENSRNOG00000007049, ENSRNOG00000018958, ENSRNOG00000004392, ENSRNOG00000018141, ENSRNOG00000058545
MF	GO:0005178	integrin binding	12	0.0328449	0.491031	ENSRNOG00000048472, ENSRNOG00000022071, ENSRNOG00000021161, ENSRNOG00000012160, ENSRNOG00000019689, ENSRNOG00000012208, ENSRNOG00000006604, ENSRNOG00000001224, ENSRNOG00000008180, ENSRNOG00000009465, ENSRNOG00000017980, ENSRNOG00000004275
MF	GO:0031491	nucleosome binding	5	0.0340107	0.500125	ENSRNOG00000006137, ENSRNOG00000026408, ENSRNOG00000050106, ENSRNOG00000017030, ENSRNOG00000045770
BP	GO:0045910	negative regulation of DNA recombination	4	0.0343976	0.674155	ENSRNOG00000048264, ENSRNOG00000015796, ENSRNOG00000047459, ENSRNOG00000060355
BP	GO:0007019	microtubule depolymerization	4	0.0343976	0.674155	ENSRNOG00000011705, ENSRNOG00000016810, ENSRNOG00000012735, ENSRNOG00000019100
BP	GO:1990869	cellular response to chemokine	4	0.0343976	0.674155	ENSRNOG00000015894, ENSRNOG00000018985, ENSRNOG00000018804, ENSRNOG00000028198
BP	GO:0050732	negative regulation of peptidyl-tyrosine phosphorylation	4	0.0343976	0.674155	ENSRNOG00000030930, ENSRNOG00000000655, ENSRNOG00000009465, ENSRNOG00000014294
BP	GO:0000165	MAPK cascade	11	0.0354702	0.691269	ENSRNOG00000016378, ENSRNOG00000032247, ENSRNOG00000021061, ENSRNOG00000007271, ENSRNOG00000027839, ENSRNOG00000001138, ENSRNOG00000015603, ENSRNOG00000023258, ENSRNOG00000000655, ENSRNOG00000014294, ENSRNOG00000013177
BP	GO:0007265	Ras protein signal transduction	8	0.0363831	0.705101	ENSRNOG00000013564, ENSRNOG00000016910, ENSRNOG00000017737, ENSRNOG00000039859, ENSRNOG00000005404, ENSRNOG00000004736, ENSRNOG00000021098, ENSRNOG00000027894
MF	GO:0031490	chromatin DNA binding	9	0.0365765	0.529179	ENSRNOG00000048264, ENSRNOG00000004410, ENSRNOG00000006048, ENSRNOG00000051948, ENSRNOG00000011523, ENSRNOG00000047459, ENSRNOG00000060355, ENSRNOG00000013397, ENSRNOG00000007387
BP	GO:0051209	release of sequestered calcium ion into cytosol	6	0.0376768	0.721084	ENSRNOG00000038540, ENSRNOG00000009705, ENSRNOG00000000655, ENSRNOG00000059344, ENSRNOG00000051986, ENSRNOG00000017671
BP	GO:0070527	platelet aggregation	6	0.0376768	0.721084	ENSRNOG00000005214, ENSRNOG00000048472, ENSRNOG00000022071, ENSRNOG00000021161, ENSRNOG00000026039, ENSRNOG00000014294
CC	GO:0031256	leading edge membrane	3	0.0378424	0.389723	ENSRNOG00000059140, ENSRNOG00000015894, ENSRNOG00000037409
CC	GO:0000801	central element	3	0.0378424	0.389723	ENSRNOG00000024073, ENSRNOG00000032929, ENSRNOG00000025672
CC	GO:0031390	Ctf18 RFC-like complex	3	0.0378424	0.389723	ENSRNOG00000001134, ENSRNOG00000001457, ENSRNOG00000051528
CC	GO:0043235	receptor complex	16	0.0386952	0.389723	ENSRNOG00000054764, ENSRNOG00000057702, ENSRNOG00000012208, ENSRNOG00000001224, ENSRNOG00000037409, ENSRNOG00000004405, ENSRNOG00000003954, ENSRNOG00000005954, ENSRNOG00000002327, ENSRNOG00000034164, ENSRNOG00000015441, ENSRNOG00000014367, ENSRNOG00000016712, ENSRNOG00000007270, ENSRNOG00000008552, ENSRNOG00000005662
CC	GO:0009898	cytoplasmic side of plasma membrane	7	0.0390487	0.389723	ENSRNOG00000019614, ENSRNOG00000004639, ENSRNOG00000000655, ENSRNOG00000029197, ENSRNOG00000006410, ENSRNOG00000009760, ENSRNOG00000001173
BP	GO:0050688	regulation of defense response to virus	3	0.0390786	0.721084	ENSRNOG00000020699, ENSRNOG00000026039, ENSRNOG00000036711
BP	GO:1990918	double-strand break repair involved in meiotic recombination	3	0.0390786	0.721084	ENSRNOG00000006732, ENSRNOG00000061085, ENSRNOG00000059997
BP	GO:0010216	maintenance of DNA methylation	3	0.0390786	0.721084	ENSRNOG00000039859, ENSRNOG00000048411, ENSRNOG00000017674
BP	GO:0033152	immunoglobulin V(D)J recombination	3	0.0390786	0.721084	ENSRNOG00000009184, ENSRNOG00000014605, ENSRNOG00000051499
BP	GO:0042492	gamma-delta T cell differentiation	3	0.0390786	0.721084	ENSRNOG00000009705, ENSRNOG00000012160, ENSRNOG00000000655
BP	GO:0002638	negative regulation of immunoglobulin production	3	0.0390786	0.721084	ENSRNOG00000037339, ENSRNOG00000046452, ENSRNOG00000024000
BP	GO:0006267	pre-replicative complex assembly involved in nuclear cell cycle DNA replication	3	0.0390786	0.721084	ENSRNOG00000014336, ENSRNOG00000003703, ENSRNOG00000012543
BP	GO:0043306	positive regulation of mast cell degranulation	4	0.0396495	0.723916	ENSRNOG00000012160, ENSRNOG00000000994, ENSRNOG00000009912, ENSRNOG00000015441
BP	GO:0003279	cardiac septum development	4	0.0396495	0.723916	ENSRNOG00000025209, ENSRNOG00000022015, ENSRNOG00000019560, ENSRNOG00000010708
CC	GO:0005902	microvillus	8	0.0401186	0.389723	ENSRNOG00000059140, ENSRNOG00000018524, ENSRNOG00000003232, ENSRNOG00000008409, ENSRNOG00000005825, ENSRNOG00000036711, ENSRNOG00000017496, ENSRNOG00000003098
CC	GO:0030175	filopodium	8	0.0401186	0.389723	ENSRNOG00000000053, ENSRNOG00000059140, ENSRNOG00000018524, ENSRNOG00000003232, ENSRNOG00000018804, ENSRNOG00000037409, ENSRNOG00000048915, ENSRNOG00000009760
CC	GO:0000792	heterochromatin	7	0.0416975	0.397955	ENSRNOG00000009271, ENSRNOG00000010625, ENSRNOG00000039859, ENSRNOG00000012942, ENSRNOG00000047459, ENSRNOG00000060355, ENSRNOG00000048411
BP	GO:0048709	oligodendrocyte differentiation	7	0.0419345	0.761626	ENSRNOG00000018985, ENSRNOG00000013850, ENSRNOG00000004003, ENSRNOG00000034025, ENSRNOG00000019374, ENSRNOG00000017496, ENSRNOG00000011133
MF	GO:0051287	NAD binding	7	0.0425	0.60512	ENSRNOG00000019328, ENSRNOG00000017777, ENSRNOG00000014555, ENSRNOG00000003084, ENSRNOG00000015582, ENSRNOG00000013000
BP	GO:0070372	regulation of ERK1 and ERK2 cascade	5	0.0432292	0.781053	ENSRNOG00000005883, ENSRNOG00000012160, ENSRNOG00000005404, ENSRNOG00000008180, ENSRNOG00000014294
MF	GO:0003887	DNA-directed DNA polymerase activity	4	0.0438722	0.614897	ENSRNOG00000013647, ENSRNOG00000037449, ENSRNOG00000013615, ENSRNOG00000019681
BP	GO:0042554	superoxide anion generation	4	0.0452819	0.813901	ENSRNOG00000037908, ENSRNOG00000006940, ENSRNOG00000003622, ENSRNOG00000016490
BP	GO:0006355	regulation of transcription, DNA-templated	36	0.0459476	0.82161	ENSRNOG00000006831, ENSRNOG00000007628, ENSRNOG00000011668, ENSRNOG00000028845, ENSRNOG00000003689, ENSRNOG00000031778, ENSRNOG00000012556, ENSRNOG00000033433, ENSRNOG00000011762, ENSRNOG00000002659, ENSRNOG00000017674, ENSRNOG00000024729, ENSRNOG00000018803, ENSRNOG00000038140, ENSRNOG00000006170, ENSRNOG00000010708, ENSRNOG00000004444, ENSRNOG00000005410, ENSRNOG00000008904, ENSRNOG00000055858,…
MF	GO:0004725	protein tyrosine phosphatase activity	9	0.0472326	0.638081	ENSRNOG00000019614, ENSRNOG00000004003, ENSRNOG00000007628, ENSRNOG00000013862, ENSRNOG00000000655, ENSRNOG00000034025, ENSRNOG00000014061, ENSRNOG00000014294, ENSRNOG00000014285
CC	GO:0044194	cytolytic granule	3	0.0473917	0.444502	ENSRNOG00000000394, ENSRNOG00000000994, ENSRNOG00000017749
BP	GO:0045184	establishment of protein localization	6	0.0475375	0.831836	ENSRNOG00000004444, ENSRNOG00000016377, ENSRNOG00000018804, ENSRNOG00000006327, ENSRNOG00000001700, ENSRNOG00000024452
MF	GO:0019865	immunoglobulin binding	3	0.0478084	0.638081	ENSRNOG00000020945, ENSRNOG00000019689, ENSRNOG00000046452
MF	GO:0045296	cadherin binding	7	0.0482254	0.638081	ENSRNOG00000018557, ENSRNOG00000013280, ENSRNOG00000001888, ENSRNOG00000034025, ENSRNOG00000006410, ENSRNOG00000011133, ENSRNOG00000003098
MF	GO:0008270	zinc ion binding	40	0.0483718	0.638081	ENSRNOG00000006831, ENSRNOG00000024461, ENSRNOG00000004630, ENSRNOG00000006418, ENSRNOG00000039859, ENSRNOG00000011688, ENSRNOG00000005404, ENSRNOG00000003769, ENSRNOG00000004639, ENSRNOG00000054371, ENSRNOG00000003328, ENSRNOG00000011022, ENSRNOG00000025938, ENSRNOG00000021896, ENSRNOG00000017714, ENSRNOG00000019913, ENSRNOG00000003084, ENSRNOG00000021355, ENSRNOG00000010708, ENSRNOG00000048411,…
BP	GO:0032730	positive regulation of interleukin-1 alpha production	3	0.0489174	0.831836	ENSRNOG00000015082, ENSRNOG00000012556, ENSRNOG00000011680
BP	GO:0098532	histone H3-K27 trimethylation	3	0.0489174	0.831836	ENSRNOG00000048264, ENSRNOG00000006048, ENSRNOG00000047459
BP	GO:0006346	methylation-dependent chromatin silencing	3	0.0489174	0.831836	ENSRNOG00000009271, ENSRNOG00000010625, ENSRNOG00000039859
BP	GO:0045589	regulation of regulatory T cell differentiation	3	0.0489174	0.831836	ENSRNOG00000061085, ENSRNOG00000009705, ENSRNOG00000028198
BP	GO:0002115	store-operated calcium entry	3	0.0489174	0.831836	ENSRNOG00000020945, ENSRNOG00000020425, ENSRNOG00000001427
BP	GO:0051142	positive regulation of NK T cell proliferation	3	0.0489174	0.831836	ENSRNOG00000007270, ENSRNOG00000032948, ENSRNOG00000006167
BP	GO:0002315	marginal zone B cell differentiation	3	0.0489174	0.831836	ENSRNOG00000027839, ENSRNOG00000013321, ENSRNOG00000008133
BP	GO:0006544	glycine metabolic process	3	0.0489174	0.831836	ENSRNOG00000019328, ENSRNOG00000007395, ENSRNOG00000005275
BP	GO:1903753	negative regulation of p38MAPK cascade	3	0.0489174	0.831836	ENSRNOG00000018524, ENSRNOG00000019614, ENSRNOG00000004003
BP	GO:0006508	proteolysis	26	0.0493692	0.835423	ENSRNOG00000031930, ENSRNOG00000001165, ENSRNOG00000030763, ENSRNOG00000025293, ENSRNOG00000029814, ENSRNOG00000011022, ENSRNOG00000011561, ENSRNOG00000020647, ENSRNOG00000046834, ENSRNOG00000019854, ENSRNOG00000021896, ENSRNOG00000016707, ENSRNOG00000009342, ENSRNOG00000004494, ENSRNOG00000026650, ENSRNOG00000057855, ENSRNOG00000005278, ENSRNOG00000004009, ENSRNOG00000017181, ENSRNOG00000033685,…
MF	GO:0004683	calmodulin-dependent protein kinase activity	4	0.0497089	0.646216	ENSRNOG00000027839, ENSRNOG00000058938, ENSRNOG00000011589, ENSRNOG00000004726
CC	GO:0043231	intracellular membrane-bounded organelle	56	0.0499604	0.460652	ENSRNOG00000002014, ENSRNOG00000003069, ENSRNOG00000029814, ENSRNOG00000007229, ENSRNOG00000031778, ENSRNOG00000031536, ENSRNOG00000012378, ENSRNOG00000003748, ENSRNOG00000024729, ENSRNOG00000020647, ENSRNOG00000008310, ENSRNOG00000004150, ENSRNOG00000004192, ENSRNOG00000003581, ENSRNOG00000055650, ENSRNOG00000019620, ENSRNOG00000015582, ENSRNOG00000030093, ENSRNOG00000042747, ENSRNOG00000020337,…

## Sheet: 14d up GO
Table S7. Gene Ontology analysis of up-regulated genes in the Dex 14d group. Terms with p values smaller than 0.05 were regarded as statistically significant enriched. Statistical test method: hypergeometric test / Fisher's exact test. FDR correction method: Benjamini and Hochberg.
Ontology	ID	Term	Input number	p value	Corrected p Value	Genes
CC	GO:0005615	extracellular space	95	2.54287e-14	7.32347e-12	ENSRNOG00000023151, ENSRNOG00000009848, ENSRNOG00000025691, ENSRNOG00000010478, ENSRNOG00000003304, ENSRNOG00000010872, ENSRNOG00000001766, ENSRNOG00000053086, ENSRNOG00000020716, ENSRNOG00000000913, ENSRNOG00000052510, ENSRNOG00000020206, ENSRNOG00000018445, ENSRNOG00000015654, ENSRNOG00000013994, ENSRNOG00000020369, ENSRNOG00000002093, ENSRNOG00000008478, ENSRNOG00000013717, ENSRNOG00000047321,…
CC	GO:0009986	cell surface	58	3.58994e-14	7.32347e-12	ENSRNOG00000059947, ENSRNOG00000004476, ENSRNOG00000002413, ENSRNOG00000007900, ENSRNOG00000031890, ENSRNOG00000001766, ENSRNOG00000004912, ENSRNOG00000019890, ENSRNOG00000018487, ENSRNOG00000013300, ENSRNOG00000020716, ENSRNOG00000018322, ENSRNOG00000013791, ENSRNOG00000018126, ENSRNOG00000015654, ENSRNOG00000013994, ENSRNOG00000016502, ENSRNOG00000047605, ENSRNOG00000046639, ENSRNOG00000015615,…
CC	GO:0005576	extracellular region	54	1.13993e-08	1.5503e-06	ENSRNOG00000023151, ENSRNOG00000059947, ENSRNOG00000004476, ENSRNOG00000010797, ENSRNOG00000011568, ENSRNOG00000001766, ENSRNOG00000016262, ENSRNOG00000053086, ENSRNOG00000013791, ENSRNOG00000012094, ENSRNOG00000013994, ENSRNOG00000016628, ENSRNOG00000008478, ENSRNOG00000002052, ENSRNOG00000048651, ENSRNOG00000012807, ENSRNOG00000033527, ENSRNOG00000012804, ENSRNOG00000011913, ENSRNOG00000002167,…
CC	GO:0005886	plasma membrane	169	1.00288e-07	8.58224e-06	ENSRNOG00000052354, ENSRNOG00000051661, ENSRNOG00000000990, ENSRNOG00000008479, ENSRNOG00000004438, ENSRNOG00000001963, ENSRNOG00000000511, ENSRNOG00000031890, ENSRNOG00000056550, ENSRNOG00000010037, ENSRNOG00000018322, ENSRNOG00000017198, ENSRNOG00000020129, ENSRNOG00000022946, ENSRNOG00000047605, ENSRNOG00000015615, ENSRNOG00000027954, ENSRNOG00000008990, ENSRNOG00000002001, ENSRNOG00000028930,…
CC	GO:0043025	neuronal cell body	42	1.1218e-07	8.58224e-06	ENSRNOG00000027233, ENSRNOG00000030644, ENSRNOG00000005985, ENSRNOG00000008479, ENSRNOG00000028404, ENSRNOG00000008996, ENSRNOG00000011107, ENSRNOG00000009329, ENSRNOG00000010872, ENSRNOG00000031890, ENSRNOG00000016163, ENSRNOG00000028708, ENSRNOG00000018487, ENSRNOG00000018322, ENSRNOG00000010053, ENSRNOG00000022946, ENSRNOG00000016289, ENSRNOG00000019977, ENSRNOG00000015654, ENSRNOG00000013994,…
CC	GO:0043235	receptor complex	23	1.26209e-07	8.58224e-06	ENSRNOG00000006997, ENSRNOG00000002244, ENSRNOG00000032973, ENSRNOG00000002511, ENSRNOG00000008129, ENSRNOG00000056915, ENSRNOG00000018461, ENSRNOG00000016050, ENSRNOG00000011696, ENSRNOG00000052469, ENSRNOG00000013213, ENSRNOG00000032576, ENSRNOG00000020716, ENSRNOG00000016374, ENSRNOG00000054420, ENSRNOG00000018414, ENSRNOG00000016289, ENSRNOG00000014751, ENSRNOG00000015654, ENSRNOG00000046829,…
CC	GO:0030424	axon	35	2.29884e-07	1.3399e-05	ENSRNOG00000006997, ENSRNOG00000009629, ENSRNOG00000057966, ENSRNOG00000008479, ENSRNOG00000004438, ENSRNOG00000028746, ENSRNOG00000001963, ENSRNOG00000031890, ENSRNOG00000028708, ENSRNOG00000001628, ENSRNOG00000033099, ENSRNOG00000010053, ENSRNOG00000029071, ENSRNOG00000016502, ENSRNOG00000047605, ENSRNOG00000048651, ENSRNOG00000027697, ENSRNOG00000004890, ENSRNOG00000003276, ENSRNOG00000007038,…
MF	GO:0008201	heparin binding	19	5.45552e-07	0.000423348	ENSRNOG00000006997, ENSRNOG00000052287, ENSRNOG00000008816, ENSRNOG00000002667, ENSRNOG00000011568, ENSRNOG00000057794, ENSRNOG00000031890, ENSRNOG00000016050, ENSRNOG00000001865, ENSRNOG00000003616, ENSRNOG00000018454, ENSRNOG00000015461, ENSRNOG00000016752, ENSRNOG00000019977, ENSRNOG00000012094, ENSRNOG00000050706, ENSRNOG00000002072, ENSRNOG00000002093, ENSRNOG00000002052
BP	GO:0001525	angiogenesis	22	7.24776e-07	0.00230769	ENSRNOG00000050220, ENSRNOG00000009848, ENSRNOG00000026053, ENSRNOG00000011568, ENSRNOG00000010797, ENSRNOG00000012347, ENSRNOG00000018461, ENSRNOG00000016050, ENSRNOG00000004912, ENSRNOG00000051854, ENSRNOG00000003715, ENSRNOG00000016374, ENSRNOG00000017198, ENSRNOG00000021318, ENSRNOG00000014610, ENSRNOG00000046829, ENSRNOG00000016678, ENSRNOG00000014117, ENSRNOG00000009390, ENSRNOG00000002093,…
MF	GO:0019838	growth factor binding	10	1.8788e-06	0.000728976	ENSRNOG00000028896, ENSRNOG00000012094, ENSRNOG00000015654, ENSRNOG00000002244, ENSRNOG00000046829, ENSRNOG00000002511, ENSRNOG00000018461, ENSRNOG00000011696, ENSRNOG00000020716, ENSRNOG00000005033
BP	GO:0007568	aging	27	1.9925e-06	0.00317206	ENSRNOG00000005985, ENSRNOG00000031979, ENSRNOG00000010997, ENSRNOG00000000299, ENSRNOG00000031890, ENSRNOG00000018461, ENSRNOG00000001766, ENSRNOG00000018445, ENSRNOG00000013994, ENSRNOG00000007041, ENSRNOG00000027697, ENSRNOG00000012807, ENSRNOG00000008869, ENSRNOG00000006302, ENSRNOG00000011913, ENSRNOG00000007457, ENSRNOG00000012749, ENSRNOG00000002244, ENSRNOG00000008943, ENSRNOG00000018454,…
CC	GO:0016323	basolateral plasma membrane	23	2.01824e-06	0.00010293	ENSRNOG00000003276, ENSRNOG00000012508, ENSRNOG00000009629, ENSRNOG00000008479, ENSRNOG00000009832, ENSRNOG00000001766, ENSRNOG00000010037, ENSRNOG00000016163, ENSRNOG00000018487, ENSRNOG00000019752, ENSRNOG00000000936, ENSRNOG00000032871, ENSRNOG00000015562, ENSRNOG00000019118, ENSRNOG00000018778, ENSRNOG00000018126, ENSRNOG00000013994, ENSRNOG00000014347, ENSRNOG00000052979, ENSRNOG00000015306,…
CC	GO:0009897	external side of plasma membrane	32	3.39895e-06	0.000154086	ENSRNOG00000059947, ENSRNOG00000005985, ENSRNOG00000012779, ENSRNOG00000011227, ENSRNOG00000002413, ENSRNOG00000031890, ENSRNOG00000001766, ENSRNOG00000004912, ENSRNOG00000010331, ENSRNOG00000001407, ENSRNOG00000010253, ENSRNOG00000013791, ENSRNOG00000059182, ENSRNOG00000018126, ENSRNOG00000015654, ENSRNOG00000021217, ENSRNOG00000046639, ENSRNOG00000015615, ENSRNOG00000021155, ENSRNOG00000046254,…
BP	GO:0001649	osteoblast differentiation	14	3.66053e-06	0.00388504	ENSRNOG00000009848, ENSRNOG00000008816, ENSRNOG00000008943, ENSRNOG00000052469, ENSRNOG00000001628, ENSRNOG00000051993, ENSRNOG00000016289, ENSRNOG00000013994, ENSRNOG00000017206, ENSRNOG00000020369, ENSRNOG00000043451, ENSRNOG00000002093, ENSRNOG00000008478, ENSRNOG00000013717
CC	GO:0005887	integral component of plasma membrane	59	4.32855e-06	0.000176605	ENSRNOG00000027233, ENSRNOG00000054458, ENSRNOG00000029810, ENSRNOG00000008479, ENSRNOG00000007900, ENSRNOG00000001766, ENSRNOG00000020716, ENSRNOG00000001407, ENSRNOG00000059182, ENSRNOG00000018126, ENSRNOG00000015654, ENSRNOG00000013994, ENSRNOG00000048139, ENSRNOG00000009005, ENSRNOG00000002093, ENSRNOG00000021097, ENSRNOG00000012727, ENSRNOG00000002244, ENSRNOG00000009832, ENSRNOG00000028538,…
BP	GO:0007275	multicellular organism development	12	8.09123e-06	0.00644062	ENSRNOG00000018414, ENSRNOG00000014751, ENSRNOG00000002244, ENSRNOG00000046829, ENSRNOG00000002511, ENSRNOG00000032490, ENSRNOG00000018461, ENSRNOG00000016050, ENSRNOG00000013213, ENSRNOG00000020716, ENSRNOG00000016374, ENSRNOG00000054420
CC	GO:0016324	apical plasma membrane	28	8.56668e-06	0.000317746	ENSRNOG00000009848, ENSRNOG00000005985, ENSRNOG00000011227, ENSRNOG00000018461, ENSRNOG00000010331, ENSRNOG00000018487, ENSRNOG00000019752, ENSRNOG00000013791, ENSRNOG00000018126, ENSRNOG00000014347, ENSRNOG00000017976, ENSRNOG00000021155, ENSRNOG00000007041, ENSRNOG00000021097, ENSRNOG00000008990, ENSRNOG00000004890, ENSRNOG00000012508, ENSRNOG00000028930, ENSRNOG00000009832, ENSRNOG00000002305,…
CC	GO:0045202	synapse	37	1.27571e-05	0.000433741	ENSRNOG00000006997, ENSRNOG00000008479, ENSRNOG00000004314, ENSRNOG00000002413, ENSRNOG00000016163, ENSRNOG00000028708, ENSRNOG00000018487, ENSRNOG00000018322, ENSRNOG00000000936, ENSRNOG00000017511, ENSRNOG00000016245, ENSRNOG00000014862, ENSRNOG00000013994, ENSRNOG00000029071, ENSRNOG00000026705, ENSRNOG00000016628, ENSRNOG00000020284, ENSRNOG00000027697, ENSRNOG00000012807, ENSRNOG00000002001,…
BP	GO:0014070	response to organic cyclic compound	24	1.68595e-05	0.0091779	ENSRNOG00000007546, ENSRNOG00000030644, ENSRNOG00000010997, ENSRNOG00000011107, ENSRNOG00000046261, ENSRNOG00000006966, ENSRNOG00000018461, ENSRNOG00000010331, ENSRNOG00000011696, ENSRNOG00000010210, ENSRNOG00000019120, ENSRNOG00000002607, ENSRNOG00000034013, ENSRNOG00000052564, ENSRNOG00000018414, ENSRNOG00000014254, ENSRNOG00000017206, ENSRNOG00000020369, ENSRNOG00000018659, ENSRNOG00000015615,…
BP	GO:0030282	bone mineralization	10	1.7295e-05	0.0091779	ENSRNOG00000002154, ENSRNOG00000008816, ENSRNOG00000019183, ENSRNOG00000013994, ENSRNOG00000002158, ENSRNOG00000010960, ENSRNOG00000043451, ENSRNOG00000008478, ENSRNOG00000002607, ENSRNOG00000016374
BP	GO:0001503	ossification	13	2.17718e-05	0.00922039	ENSRNOG00000002167, ENSRNOG00000019183, ENSRNOG00000002158, ENSRNOG00000046261, ENSRNOG00000002607, ENSRNOG00000010053, ENSRNOG00000013994, ENSRNOG00000020369, ENSRNOG00000018659, ENSRNOG00000015615, ENSRNOG00000008478, ENSRNOG00000013717, ENSRNOG00000005695
BP	GO:0033674	positive regulation of kinase activity	11	2.74408e-05	0.00922039	ENSRNOG00000002001, ENSRNOG00000018414, ENSRNOG00000014751, ENSRNOG00000002244, ENSRNOG00000046829, ENSRNOG00000002511, ENSRNOG00000018461, ENSRNOG00000016050, ENSRNOG00000013213, ENSRNOG00000020716, ENSRNOG00000016374
BP	GO:0008284	positive regulation of cell proliferation	35	2.81381e-05	0.00922039	ENSRNOG00000027233, ENSRNOG00000009848, ENSRNOG00000010997, ENSRNOG00000002511, ENSRNOG00000010797, ENSRNOG00000018461, ENSRNOG00000004912, ENSRNOG00000019890, ENSRNOG00000013670, ENSRNOG00000016289, ENSRNOG00000018445, ENSRNOG00000020369, ENSRNOG00000015911, ENSRNOG00000002093, ENSRNOG00000005386, ENSRNOG00000007089, ENSRNOG00000026053, ENSRNOG00000002244, ENSRNOG00000060806, ENSRNOG00000005933,…
BP	GO:0071560	cellular response to transforming growth factor beta stimulus	13	2.89585e-05	0.00922039	ENSRNOG00000028930, ENSRNOG00000002964, ENSRNOG00000008943, ENSRNOG00000002607, ENSRNOG00000016374, ENSRNOG00000052510, ENSRNOG00000010053, ENSRNOG00000020514, ENSRNOG00000018414, ENSRNOG00000013994, ENSRNOG00000027869, ENSRNOG00000021155, ENSRNOG00000046254
BP	GO:0007155	cell adhesion	25	3.88686e-05	0.0102832	ENSRNOG00000006997, ENSRNOG00000059947, ENSRNOG00000008816, ENSRNOG00000009949, ENSRNOG00000004438, ENSRNOG00000002158, ENSRNOG00000031890, ENSRNOG00000004912, ENSRNOG00000019890, ENSRNOG00000047605, ENSRNOG00000046639, ENSRNOG00000005386, ENSRNOG00000007038, ENSRNOG00000003217, ENSRNOG00000009735, ENSRNOG00000060329, ENSRNOG00000013213, ENSRNOG00000033064, ENSRNOG00000032576, ENSRNOG00000018778,…
BP	GO:0051384	response to glucocorticoid	14	4.19414e-05	0.0102832	ENSRNOG00000033527, ENSRNOG00000059947, ENSRNOG00000002792, ENSRNOG00000028896, ENSRNOG00000012749, ENSRNOG00000011107, ENSRNOG00000019120, ENSRNOG00000010053, ENSRNOG00000033280, ENSRNOG00000011381, ENSRNOG00000015654, ENSRNOG00000013717, ENSRNOG00000005695, ENSRNOG00000020196
MF	GO:0005539	glycosaminoglycan binding	7	4.48749e-05	0.00889316	ENSRNOG00000016752, ENSRNOG00000004706, ENSRNOG00000009037, ENSRNOG00000002093, ENSRNOG00000002052, ENSRNOG00000015461, ENSRNOG00000046159
BP	GO:0055072	iron ion homeostasis	8	4.52149e-05	0.0102832	ENSRNOG00000021318, ENSRNOG00000011913, ENSRNOG00000011649, ENSRNOG00000008602, ENSRNOG00000014117, ENSRNOG00000018053, ENSRNOG00000018322, ENSRNOG00000001407
BP	GO:0002053	positive regulation of mesenchymal cell proliferation	8	4.52149e-05	0.0102832	ENSRNOG00000014597, ENSRNOG00000046829, ENSRNOG00000015911, ENSRNOG00000054508, ENSRNOG00000016050, ENSRNOG00000052469, ENSRNOG00000002607, ENSRNOG00000016374
MF	GO:0005178	integrin binding	15	4.5841e-05	0.00889316	ENSRNOG00000006997, ENSRNOG00000028930, ENSRNOG00000029810, ENSRNOG00000008816, ENSRNOG00000002158, ENSRNOG00000010797, ENSRNOG00000042848, ENSRNOG00000004912, ENSRNOG00000015562, ENSRNOG00000046829, ENSRNOG00000020369, ENSRNOG00000013589, ENSRNOG00000021217, ENSRNOG00000046639, ENSRNOG00000043451
BP	GO:0051216	cartilage development	11	5.39754e-05	0.0107832	ENSRNOG00000020514, ENSRNOG00000013994, ENSRNOG00000027869, ENSRNOG00000016606, ENSRNOG00000009037, ENSRNOG00000008885, ENSRNOG00000052469, ENSRNOG00000008478, ENSRNOG00000002607, ENSRNOG00000005695, ENSRNOG00000013717
BP	GO:0007169	transmembrane receptor protein tyrosine kinase signaling pathway	13	5.41869e-05	0.0107832	ENSRNOG00000002244, ENSRNOG00000002511, ENSRNOG00000018461, ENSRNOG00000016050, ENSRNOG00000013213, ENSRNOG00000020716, ENSRNOG00000016374, ENSRNOG00000051169, ENSRNOG00000018414, ENSRNOG00000014751, ENSRNOG00000046829, ENSRNOG00000018659, ENSRNOG00000048651
BP	GO:0030154	cell differentiation	30	6.09513e-05	0.0114158	ENSRNOG00000000691, ENSRNOG00000007765, ENSRNOG00000009329, ENSRNOG00000020716, ENSRNOG00000000936, ENSRNOG00000021318, ENSRNOG00000016289, ENSRNOG00000046912, ENSRNOG00000008095, ENSRNOG00000018427, ENSRNOG00000006491, ENSRNOG00000013717, ENSRNOG00000060603, ENSRNOG00000011977, ENSRNOG00000054648, ENSRNOG00000012347, ENSRNOG00000004109, ENSRNOG00000052469, ENSRNOG00000002607, ENSRNOG00000054420,…
BP	GO:0030198	extracellular matrix organization	16	7.65974e-05	0.0135492	ENSRNOG00000006997, ENSRNOG00000012508, ENSRNOG00000002167, ENSRNOG00000002244, ENSRNOG00000002158, ENSRNOG00000057794, ENSRNOG00000004706, ENSRNOG00000011575, ENSRNOG00000002607, ENSRNOG00000014034, ENSRNOG00000016752, ENSRNOG00000018445, ENSRNOG00000050706, ENSRNOG00000008478, ENSRNOG00000023257, ENSRNOG00000002052
BP	GO:0030316	osteoclast differentiation	9	9.31571e-05	0.0149393	ENSRNOG00000018414, ENSRNOG00000009629, ENSRNOG00000013994, ENSRNOG00000011944, ENSRNOG00000046261, ENSRNOG00000018659, ENSRNOG00000015615, ENSRNOG00000001766, ENSRNOG00000010053
BP	GO:0070374	positive regulation of ERK1 and ERK2 cascade	19	9.38396e-05	0.0149393	ENSRNOG00000006997, ENSRNOG00000050220, ENSRNOG00000008816, ENSRNOG00000002244, ENSRNOG00000019183, ENSRNOG00000002511, ENSRNOG00000002964, ENSRNOG00000018461, ENSRNOG00000018454, ENSRNOG00000016374, ENSRNOG00000019005, ENSRNOG00000033099, ENSRNOG00000018233, ENSRNOG00000010053, ENSRNOG00000018414, ENSRNOG00000015357, ENSRNOG00000046829, ENSRNOG00000013589, ENSRNOG00000013934
BP	GO:0007204	positive regulation of cytosolic calcium ion concentration	16	9.86204e-05	0.0149527	ENSRNOG00000027233, ENSRNOG00000002792, ENSRNOG00000002146, ENSRNOG00000002244, ENSRNOG00000010997, ENSRNOG00000008479, ENSRNOG00000012347, ENSRNOG00000004912, ENSRNOG00000010640, ENSRNOG00000030387, ENSRNOG00000010053, ENSRNOG00000018445, ENSRNOG00000046829, ENSRNOG00000015403, ENSRNOG00000009390, ENSRNOG00000004890
BP	GO:0060045	positive regulation of cardiac muscle cell proliferation	7	0.000115604	0.0164159	ENSRNOG00000005933, ENSRNOG00000031890, ENSRNOG00000016050, ENSRNOG00000004109, ENSRNOG00000052469, ENSRNOG00000002093, ENSRNOG00000016374
BP	GO:0006897	endocytosis	16	0.000118582	0.0164159	ENSRNOG00000049484, ENSRNOG00000006997, ENSRNOG00000002001, ENSRNOG00000028930, ENSRNOG00000011944, ENSRNOG00000003217, ENSRNOG00000018322, ENSRNOG00000010253, ENSRNOG00000022737, ENSRNOG00000018434, ENSRNOG00000061582, ENSRNOG00000015654, ENSRNOG00000013994, ENSRNOG00000052979, ENSRNOG00000015911, ENSRNOG00000006076
CC	GO:0031012	extracellular matrix	20	0.000147961	0.00464369	ENSRNOG00000002154, ENSRNOG00000002167, ENSRNOG00000002158, ENSRNOG00000002667, ENSRNOG00000003304, ENSRNOG00000057794, ENSRNOG00000004706, ENSRNOG00000011575, ENSRNOG00000018454, ENSRNOG00000014034, ENSRNOG00000016752, ENSRNOG00000015357, ENSRNOG00000050706, ENSRNOG00000039560, ENSRNOG00000002093, ENSRNOG00000008478, ENSRNOG00000023257, ENSRNOG00000002052, ENSRNOG00000005695, ENSRNOG00000027784
MF	GO:0005509	calcium ion binding	37	0.00015061	0.0233746	ENSRNOG00000004498, ENSRNOG00000009949, ENSRNOG00000008479, ENSRNOG00000001628, ENSRNOG00000013791, ENSRNOG00000020129, ENSRNOG00000012094, ENSRNOG00000016448, ENSRNOG00000013994, ENSRNOG00000016628, ENSRNOG00000027954, ENSRNOG00000046254, ENSRNOG00000008478, ENSRNOG00000006645, ENSRNOG00000002001, ENSRNOG00000003496, ENSRNOG00000050220, ENSRNOG00000008902, ENSRNOG00000002146, ENSRNOG00000002863,…
CC	GO:0015629	actin cytoskeleton	18	0.000162115	0.00472448	ENSRNOG00000008869, ENSRNOG00000003276, ENSRNOG00000004498, ENSRNOG00000019181, ENSRNOG00000059801, ENSRNOG00000020716, ENSRNOG00000019357, ENSRNOG00000018991, ENSRNOG00000034013, ENSRNOG00000017500, ENSRNOG00000014256, ENSRNOG00000017546, ENSRNOG00000014479, ENSRNOG00000008223, ENSRNOG00000006003, ENSRNOG00000020151, ENSRNOG00000004890
BP	GO:0008203	cholesterol metabolic process	10	0.000175632	0.0215427	ENSRNOG00000006997, ENSRNOG00000008902, ENSRNOG00000018126, ENSRNOG00000015911, ENSRNOG00000021046, ENSRNOG00000009730, ENSRNOG00000018053, ENSRNOG00000018454, ENSRNOG00000059801, ENSRNOG00000027784
BP	GO:0010628	positive regulation of gene expression	33	0.00017577	0.0215427	ENSRNOG00000006997, ENSRNOG00000009848, ENSRNOG00000003443, ENSRNOG00000004438, ENSRNOG00000056550, ENSRNOG00000001766, ENSRNOG00000028708, ENSRNOG00000019890, ENSRNOG00000052510, ENSRNOG00000010053, ENSRNOG00000020129, ENSRNOG00000018445, ENSRNOG00000005180, ENSRNOG00000021097, ENSRNOG00000013717, ENSRNOG00000050220, ENSRNOG00000002146, ENSRNOG00000005933, ENSRNOG00000004107, ENSRNOG00000012106,…
MF	GO:0000987	core promoter proximal region sequence-specific DNA binding	11	0.000181414	0.0234629	ENSRNOG00000000691, ENSRNOG00000020514, ENSRNOG00000021318, ENSRNOG00000046912, ENSRNOG00000017414, ENSRNOG00000003443, ENSRNOG00000027869, ENSRNOG00000025724, ENSRNOG00000010259, ENSRNOG00000046487, ENSRNOG00000002607
BP	GO:0030324	lung development	14	0.000181856	0.0215427	ENSRNOG00000009848, ENSRNOG00000011913, ENSRNOG00000002244, ENSRNOG00000016050, ENSRNOG00000004109, ENSRNOG00000052469, ENSRNOG00000019120, ENSRNOG00000016374, ENSRNOG00000021318, ENSRNOG00000016752, ENSRNOG00000046829, ENSRNOG00000018427, ENSRNOG00000054508, ENSRNOG00000005695
BP	GO:0031214	biomineral tissue development	6	0.00018268	0.0215427	ENSRNOG00000002154, ENSRNOG00000002167, ENSRNOG00000013994, ENSRNOG00000002158, ENSRNOG00000001314, ENSRNOG00000043451
BP	GO:0051897	positive regulation of protein kinase B signaling	13	0.000204576	0.0232632	ENSRNOG00000002001, ENSRNOG00000050220, ENSRNOG00000009848, ENSRNOG00000011977, ENSRNOG00000016050, ENSRNOG00000020716, ENSRNOG00000018233, ENSRNOG00000010053, ENSRNOG00000014751, ENSRNOG00000017206, ENSRNOG00000020369, ENSRNOG00000013589, ENSRNOG00000046487
CC	GO:0098685	Schaffer collateral - CA1 synapse	12	0.000218403	0.00594057	ENSRNOG00000018778, ENSRNOG00000050220, ENSRNOG00000016358, ENSRNOG00000059683, ENSRNOG00000026705, ENSRNOG00000019181, ENSRNOG00000031890, ENSRNOG00000013213, ENSRNOG00000018322, ENSRNOG00000006761, ENSRNOG00000033099, ENSRNOG00000004890
BP	GO:0007584	response to nutrient	13	0.000252418	0.0277138	ENSRNOG00000028896, ENSRNOG00000006302, ENSRNOG00000011913, ENSRNOG00000008479, ENSRNOG00000001766, ENSRNOG00000019120, ENSRNOG00000010640, ENSRNOG00000051235, ENSRNOG00000011150, ENSRNOG00000018126, ENSRNOG00000008223, ENSRNOG00000020420, ENSRNOG00000005695
BP	GO:0016477	cell migration	20	0.000271052	0.0282812	ENSRNOG00000059947, ENSRNOG00000002244, ENSRNOG00000004603, ENSRNOG00000002413, ENSRNOG00000018461, ENSRNOG00000004912, ENSRNOG00000051854, ENSRNOG00000059801, ENSRNOG00000020716, ENSRNOG00000013670, ENSRNOG00000019977, ENSRNOG00000008095, ENSRNOG00000014597, ENSRNOG00000046829, ENSRNOG00000013589, ENSRNOG00000047605, ENSRNOG00000002093, ENSRNOG00000046660, ENSRNOG00000006003, ENSRNOG00000008065
BP	GO:0045165	cell fate commitment	10	0.000286237	0.0282812	ENSRNOG00000020514, ENSRNOG00000008095, ENSRNOG00000046829, ENSRNOG00000017748, ENSRNOG00000027869, ENSRNOG00000046487, ENSRNOG00000012347, ENSRNOG00000002607, ENSRNOG00000016374, ENSRNOG00000052510
BP	GO:0001502	cartilage condensation	6	0.000289154	0.0282812	ENSRNOG00000020514, ENSRNOG00000016289, ENSRNOG00000027869, ENSRNOG00000003304, ENSRNOG00000009037, ENSRNOG00000002607
BP	GO:0042632	cholesterol homeostasis	11	0.000293116	0.0282812	ENSRNOG00000009848, ENSRNOG00000012062, ENSRNOG00000018126, ENSRNOG00000015911, ENSRNOG00000009329, ENSRNOG00000009730, ENSRNOG00000018454, ENSRNOG00000059801, ENSRNOG00000021097, ENSRNOG00000017286, ENSRNOG00000027784
CC	GO:0016020	membrane	65	0.000455445	0.0116139	ENSRNOG00000022060, ENSRNOG00000004398, ENSRNOG00000011649, ENSRNOG00000008479, ENSRNOG00000010997, ENSRNOG00000001963, ENSRNOG00000031890, ENSRNOG00000001766, ENSRNOG00000010037, ENSRNOG00000004912, ENSRNOG00000018487, ENSRNOG00000018322, ENSRNOG00000019977, ENSRNOG00000059182, ENSRNOG00000018126, ENSRNOG00000015654, ENSRNOG00000047605, ENSRNOG00000021097, ENSRNOG00000003781, ENSRNOG00000053239,…
BP	GO:0009410	response to xenobiotic stimulus	29	0.000456556	0.0427551	ENSRNOG00000030644, ENSRNOG00000008479, ENSRNOG00000000299, ENSRNOG00000011107, ENSRNOG00000031890, ENSRNOG00000016163, ENSRNOG00000020129, ENSRNOG00000018126, ENSRNOG00000014862, ENSRNOG00000020369, ENSRNOG00000008478, ENSRNOG00000006302, ENSRNOG00000060806, ENSRNOG00000019120, ENSRNOG00000010640, ENSRNOG00000018053, ENSRNOG00000058006, ENSRNOG00000034013, ENSRNOG00000052564, ENSRNOG00000014254,…
BP	GO:0060070	canonical Wnt signaling pathway	11	0.000508549	0.0462634	ENSRNOG00000059947, ENSRNOG00000007765, ENSRNOG00000010997, ENSRNOG00000005933, ENSRNOG00000000299, ENSRNOG00000011568, ENSRNOG00000015911, ENSRNOG00000002607, ENSRNOG00000016374, ENSRNOG00000020151, ENSRNOG00000052510
BP	GO:0009314	response to radiation	8	0.000527867	0.0466869	ENSRNOG00000006997, ENSRNOG00000009848, ENSRNOG00000020369, ENSRNOG00000013589, ENSRNOG00000008943, ENSRNOG00000015911, ENSRNOG00000015615, ENSRNOG00000015461
BP	GO:0098883	synapse disassembly	4	0.00059654	0.0513347	ENSRNOG00000012749, ENSRNOG00000012804, ENSRNOG00000013213, ENSRNOG00000012807
BP	GO:0042493	response to drug	28	0.000656644	0.054926	ENSRNOG00000030644, ENSRNOG00000008479, ENSRNOG00000000299, ENSRNOG00000011107, ENSRNOG00000031890, ENSRNOG00000016163, ENSRNOG00000020129, ENSRNOG00000018126, ENSRNOG00000014862, ENSRNOG00000020369, ENSRNOG00000008478, ENSRNOG00000060806, ENSRNOG00000019120, ENSRNOG00000010640, ENSRNOG00000018053, ENSRNOG00000058006, ENSRNOG00000034013, ENSRNOG00000052564, ENSRNOG00000014254, ENSRNOG00000033280,…
BP	GO:0048839	inner ear development	9	0.000679018	0.054926	ENSRNOG00000018478, ENSRNOG00000012749, ENSRNOG00000015357, ENSRNOG00000002244, ENSRNOG00000028108, ENSRNOG00000018427, ENSRNOG00000010259, ENSRNOG00000018461, ENSRNOG00000011984
BP	GO:0042060	wound healing	13	0.000699384	0.054926	ENSRNOG00000059947, ENSRNOG00000002792, ENSRNOG00000002244, ENSRNOG00000005933, ENSRNOG00000019183, ENSRNOG00000018461, ENSRNOG00000056550, ENSRNOG00000016050, ENSRNOG00000016374, ENSRNOG00000018991, ENSRNOG00000020129, ENSRNOG00000020369, ENSRNOG00000027784
BP	GO:0001666	response to hypoxia	19	0.000707276	0.054926	ENSRNOG00000009848, ENSRNOG00000005985, ENSRNOG00000008479, ENSRNOG00000008943, ENSRNOG00000001766, ENSRNOG00000013017, ENSRNOG00000010640, ENSRNOG00000017198, ENSRNOG00000033280, ENSRNOG00000021318, ENSRNOG00000018414, ENSRNOG00000046829, ENSRNOG00000014117, ENSRNOG00000013589, ENSRNOG00000005195, ENSRNOG00000020420, ENSRNOG00000002093, ENSRNOG00000008478, ENSRNOG00000005650
BP	GO:0010033	response to organic substance	14	0.000762061	0.0577715	ENSRNOG00000059947, ENSRNOG00000009629, ENSRNOG00000012749, ENSRNOG00000002244, ENSRNOG00000002951, ENSRNOG00000010997, ENSRNOG00000001766, ENSRNOG00000052564, ENSRNOG00000046487, ENSRNOG00000043451, ENSRNOG00000020151, ENSRNOG00000005695, ENSRNOG00000020196, ENSRNOG00000008055
BP	GO:0007156	homophilic cell adhesion via plasma membrane adhesion molecules	13	0.000785821	0.0581873	ENSRNOG00000009949, ENSRNOG00000060329, ENSRNOG00000015562, ENSRNOG00000020129, ENSRNOG00000019977, ENSRNOG00000018778, ENSRNOG00000014751, ENSRNOG00000032490, ENSRNOG00000016502, ENSRNOG00000008223, ENSRNOG00000024711, ENSRNOG00000027954, ENSRNOG00000020151
CC	GO:0016342	catenin complex	6	0.00081933	0.0196639	ENSRNOG00000020129, ENSRNOG00000032490, ENSRNOG00000027954, ENSRNOG00000006003, ENSRNOG00000020151, ENSRNOG00000015562
BP	GO:0010035	response to inorganic substance	7	0.000887491	0.0623617	ENSRNOG00000002244, ENSRNOG00000013994, ENSRNOG00000011107, ENSRNOG00000031890, ENSRNOG00000005195, ENSRNOG00000001766, ENSRNOG00000016163
BP	GO:0099560	synaptic membrane adhesion	6	0.00089534	0.0623617	ENSRNOG00000019977, ENSRNOG00000018778, ENSRNOG00000050220, ENSRNOG00000002413, ENSRNOG00000046660, ENSRNOG00000032576
BP	GO:0007626	locomotory behavior	11	0.000900954	0.0623617	ENSRNOG00000015024, ENSRNOG00000006997, ENSRNOG00000016358, ENSRNOG00000060806, ENSRNOG00000002863, ENSRNOG00000028404, ENSRNOG00000004438, ENSRNOG00000008943, ENSRNOG00000000316, ENSRNOG00000053086, ENSRNOG00000004890
BP	GO:0001701	in utero embryonic development	21	0.00093686	0.0634673	ENSRNOG00000029886, ENSRNOG00000028930, ENSRNOG00000002244, ENSRNOG00000003443, ENSRNOG00000010259, ENSRNOG00000018461, ENSRNOG00000016050, ENSRNOG00000013017, ENSRNOG00000004109, ENSRNOG00000052469, ENSRNOG00000016374, ENSRNOG00000020514, ENSRNOG00000016358, ENSRNOG00000020369, ENSRNOG00000027869, ENSRNOG00000008885, ENSRNOG00000002093, ENSRNOG00000024115, ENSRNOG00000005480, ENSRNOG00000020151,…
CC	GO:0045177	apical part of cell	12	0.00101962	0.0222424	ENSRNOG00000006997, ENSRNOG00000009629, ENSRNOG00000060806, ENSRNOG00000056550, ENSRNOG00000043451, ENSRNOG00000051854, ENSRNOG00000010210, ENSRNOG00000033262, ENSRNOG00000020151, ENSRNOG00000015880, ENSRNOG00000005033, ENSRNOG00000007089
MF	GO:0005515	protein binding	69	0.00103509	0.103057	ENSRNOG00000027233, ENSRNOG00000059947, ENSRNOG00000009848, ENSRNOG00000008479, ENSRNOG00000010117, ENSRNOG00000008996, ENSRNOG00000004438, ENSRNOG00000009329, ENSRNOG00000031890, ENSRNOG00000010872, ENSRNOG00000001766, ENSRNOG00000010037, ENSRNOG00000004912, ENSRNOG00000012697, ENSRNOG00000018322, ENSRNOG00000017198, ENSRNOG00000022946, ENSRNOG00000014365, ENSRNOG00000026705, ENSRNOG00000020369,…
MF	GO:0048018	receptor agonist activity	8	0.00106244	0.103057	ENSRNOG00000005830, ENSRNOG00000018445, ENSRNOG00000008816, ENSRNOG00000026053, ENSRNOG00000020369, ENSRNOG00000003616, ENSRNOG00000052510, ENSRNOG00000018233
CC	GO:0005768	endosome	20	0.00107564	0.0222424	ENSRNOG00000049484, ENSRNOG00000006997, ENSRNOG00000003276, ENSRNOG00000011944, ENSRNOG00000003853, ENSRNOG00000008602, ENSRNOG00000001766, ENSRNOG00000006926, ENSRNOG00000018454, ENSRNOG00000018322, ENSRNOG00000010682, ENSRNOG00000032871, ENSRNOG00000059215, ENSRNOG00000019977, ENSRNOG00000018126, ENSRNOG00000046829, ENSRNOG00000052979, ENSRNOG00000013656, ENSRNOG00000006076, ENSRNOG00000020151
CC	GO:0071944	cell periphery	10	0.00109031	0.0222424	ENSRNOG00000022060, ENSRNOG00000026371, ENSRNOG00000008479, ENSRNOG00000046829, ENSRNOG00000019181, ENSRNOG00000011227, ENSRNOG00000016606, ENSRNOG00000016163, ENSRNOG00000046254, ENSRNOG00000020151
BP	GO:0030501	positive regulation of bone mineralization	7	0.00113405	0.0752251	ENSRNOG00000018414, ENSRNOG00000016289, ENSRNOG00000008479, ENSRNOG00000001314, ENSRNOG00000052469, ENSRNOG00000013717, ENSRNOG00000005033
BP	GO:0007420	brain development	22	0.00120996	0.0781036	ENSRNOG00000002001, ENSRNOG00000009419, ENSRNOG00000012749, ENSRNOG00000002244, ENSRNOG00000009949, ENSRNOG00000007038, ENSRNOG00000004438, ENSRNOG00000010872, ENSRNOG00000031890, ENSRNOG00000016050, ENSRNOG00000013017, ENSRNOG00000053086, ENSRNOG00000010210, ENSRNOG00000019120, ENSRNOG00000050784, ENSRNOG00000020514, ENSRNOG00000018778, ENSRNOG00000029071, ENSRNOG00000016502, ENSRNOG00000013589,…
BP	GO:0001892	embryonic placenta development	6	0.0012265	0.0781036	ENSRNOG00000021318, ENSRNOG00000002146, ENSRNOG00000008479, ENSRNOG00000020369, ENSRNOG00000010259, ENSRNOG00000012347
BP	GO:0055074	calcium ion homeostasis	7	0.00127545	0.0796278	ENSRNOG00000008479, ENSRNOG00000046829, ENSRNOG00000013994, ENSRNOG00000011944, ENSRNOG00000010960, ENSRNOG00000043451, ENSRNOG00000016050
BP	GO:0035094	response to nicotine	8	0.00134462	0.0823321	ENSRNOG00000030449, ENSRNOG00000028404, ENSRNOG00000014117, ENSRNOG00000020369, ENSRNOG00000008943, ENSRNOG00000008223, ENSRNOG00000010210, ENSRNOG00000010640
CC	GO:0043679	axon terminus	10	0.00144348	0.0280447	ENSRNOG00000008479, ENSRNOG00000011107, ENSRNOG00000026705, ENSRNOG00000008943, ENSRNOG00000059510, ENSRNOG00000028708, ENSRNOG00000013213, ENSRNOG00000010682, ENSRNOG00000020151, ENSRNOG00000058006
MF	GO:0004714	transmembrane receptor protein tyrosine kinase activity	10	0.00150578	0.113937	ENSRNOG00000018414, ENSRNOG00000014751, ENSRNOG00000002244, ENSRNOG00000046829, ENSRNOG00000002511, ENSRNOG00000018461, ENSRNOG00000016050, ENSRNOG00000013213, ENSRNOG00000020716, ENSRNOG00000016374
MF	GO:0050840	extracellular matrix binding	6	0.0016035	0.113937	ENSRNOG00000014034, ENSRNOG00000059947, ENSRNOG00000002167, ENSRNOG00000057794, ENSRNOG00000043451, ENSRNOG00000004912
MF	GO:0005102	receptor binding	22	0.00161508	0.113937	ENSRNOG00000006997, ENSRNOG00000050220, ENSRNOG00000028896, ENSRNOG00000002146, ENSRNOG00000004476, ENSRNOG00000002667, ENSRNOG00000009735, ENSRNOG00000011568, ENSRNOG00000018461, ENSRNOG00000017063, ENSRNOG00000016050, ENSRNOG00000004912, ENSRNOG00000003715, ENSRNOG00000018454, ENSRNOG00000030387, ENSRNOG00000000913, ENSRNOG00000015461, ENSRNOG00000018233, ENSRNOG00000018778, ENSRNOG00000018126,…
BP	GO:0006749	glutathione metabolic process	8	0.00176852	0.105028	ENSRNOG00000006302, ENSRNOG00000030449, ENSRNOG00000014743, ENSRNOG00000028746, ENSRNOG00000010210, ENSRNOG00000018937, ENSRNOG00000006583, ENSRNOG00000052564
BP	GO:0061098	positive regulation of protein tyrosine kinase activity	7	0.00178125	0.105028	ENSRNOG00000006997, ENSRNOG00000018414, ENSRNOG00000018445, ENSRNOG00000026053, ENSRNOG00000013213, ENSRNOG00000000902, ENSRNOG00000018233
MF	GO:0005516	calmodulin binding	14	0.00178198	0.115235	ENSRNOG00000006645, ENSRNOG00000003276, ENSRNOG00000008479, ENSRNOG00000001762, ENSRNOG00000056781, ENSRNOG00000010037, ENSRNOG00000003999, ENSRNOG00000001628, ENSRNOG00000002607, ENSRNOG00000013300, ENSRNOG00000017332, ENSRNOG00000018478, ENSRNOG00000016448, ENSRNOG00000004890
BP	GO:0010468	regulation of gene expression	23	0.00185821	0.107574	ENSRNOG00000006997, ENSRNOG00000020060, ENSRNOG00000005933, ENSRNOG00000008479, ENSRNOG00000016050, ENSRNOG00000018053, ENSRNOG00000018454, ENSRNOG00000002607, ENSRNOG00000014791, ENSRNOG00000020514, ENSRNOG00000018414, ENSRNOG00000018445, ENSRNOG00000016358, ENSRNOG00000014597, ENSRNOG00000017414, ENSRNOG00000025946, ENSRNOG00000046487, ENSRNOG00000022983, ENSRNOG00000005480, ENSRNOG00000025587,…
MF	GO:0045296	cadherin binding	8	0.00206115	0.123035	ENSRNOG00000020129, ENSRNOG00000046829, ENSRNOG00000032490, ENSRNOG00000027954, ENSRNOG00000006003, ENSRNOG00000020151, ENSRNOG00000005033, ENSRNOG00000015562
BP	GO:0002062	chondrocyte differentiation	8	0.0021042	0.119639	ENSRNOG00000020514, ENSRNOG00000016289, ENSRNOG00000009832, ENSRNOG00000028108, ENSRNOG00000027869, ENSRNOG00000016050, ENSRNOG00000052469, ENSRNOG00000002607
BP	GO:0051930	regulation of sensory perception of pain	7	0.00219438	0.122577	ENSRNOG00000005830, ENSRNOG00000029886, ENSRNOG00000010997, ENSRNOG00000031890, ENSRNOG00000016050, ENSRNOG00000028708, ENSRNOG00000021157
CC	GO:0005769	early endosome	17	0.00224903	0.0417094	ENSRNOG00000049484, ENSRNOG00000006997, ENSRNOG00000003276, ENSRNOG00000001766, ENSRNOG00000006926, ENSRNOG00000018454, ENSRNOG00000018322, ENSRNOG00000010682, ENSRNOG00000032871, ENSRNOG00000001739, ENSRNOG00000014751, ENSRNOG00000046829, ENSRNOG00000052979, ENSRNOG00000006076, ENSRNOG00000021243, ENSRNOG00000049758, ENSRNOG00000006761
BP	GO:0001755	neural crest cell migration	7	0.00242618	0.133189	ENSRNOG00000014751, ENSRNOG00000010997, ENSRNOG00000011977, ENSRNOG00000048651, ENSRNOG00000005386, ENSRNOG00000005033, ENSRNOG00000013670
CC	GO:0098978	glutamatergic synapse	26	0.00249258	0.0424847	ENSRNOG00000005985, ENSRNOG00000028404, ENSRNOG00000004314, ENSRNOG00000002413, ENSRNOG00000031890, ENSRNOG00000059683, ENSRNOG00000026705, ENSRNOG00000020284, ENSRNOG00000004890, ENSRNOG00000002001, ENSRNOG00000008869, ENSRNOG00000050220, ENSRNOG00000060806, ENSRNOG00000019181, ENSRNOG00000030910, ENSRNOG00000000368, ENSRNOG00000059510, ENSRNOG00000013213, ENSRNOG00000018454, ENSRNOG00000032576,…
CC	GO:0014069	postsynaptic density	20	0.00263259	0.0424847	ENSRNOG00000008869, ENSRNOG00000004107, ENSRNOG00000010117, ENSRNOG00000008479, ENSRNOG00000001963, ENSRNOG00000019181, ENSRNOG00000000368, ENSRNOG00000010037, ENSRNOG00000013213, ENSRNOG00000016220, ENSRNOG00000032576, ENSRNOG00000018322, ENSRNOG00000031033, ENSRNOG00000016245, ENSRNOG00000018778, ENSRNOG00000059683, ENSRNOG00000016448, ENSRNOG00000026705, ENSRNOG00000006003, ENSRNOG00000004890
BP	GO:0043278	response to morphine	7	0.0026759	0.144408	ENSRNOG00000015654, ENSRNOG00000060806, ENSRNOG00000028404, ENSRNOG00000011107, ENSRNOG00000008943, ENSRNOG00000008223, ENSRNOG00000007041
CC	GO:0034364	high-density lipoprotein particle	5	0.00268391	0.0424847	ENSRNOG00000006997, ENSRNOG00000008902, ENSRNOG00000025691, ENSRNOG00000018405, ENSRNOG00000018454
MF	GO:0001968	fibronectin binding	6	0.002746	0.152207	ENSRNOG00000017206, ENSRNOG00000021155, ENSRNOG00000004912, ENSRNOG00000008478, ENSRNOG00000021157, ENSRNOG00000002052
CC	GO:0043204	perikaryon	14	0.00279577	0.0424847	ENSRNOG00000006997, ENSRNOG00000003276, ENSRNOG00000002863, ENSRNOG00000011107, ENSRNOG00000019181, ENSRNOG00000008943, ENSRNOG00000000368, ENSRNOG00000030910, ENSRNOG00000028708, ENSRNOG00000018350, ENSRNOG00000013213, ENSRNOG00000033280, ENSRNOG00000018414, ENSRNOG00000024457
BP	GO:0006508	proteolysis	23	0.00286702	0.150464	ENSRNOG00000033527, ENSRNOG00000011107, ENSRNOG00000057794, ENSRNOG00000017063, ENSRNOG00000011575, ENSRNOG00000010331, ENSRNOG00000051854, ENSRNOG00000051235, ENSRNOG00000015880, ENSRNOG00000020206, ENSRNOG00000014610, ENSRNOG00000014118, ENSRNOG00000030904, ENSRNOG00000029141, ENSRNOG00000021881, ENSRNOG00000021155, ENSRNOG00000008478, ENSRNOG00000023257, ENSRNOG00000021157, ENSRNOG00000013628,…
BP	GO:0030500	regulation of bone mineralization	5	0.00288263	0.150464	ENSRNOG00000002167, ENSRNOG00000013994, ENSRNOG00000039560, ENSRNOG00000010960, ENSRNOG00000005695
CC	GO:0005901	caveola	9	0.0028856	0.0424847	ENSRNOG00000005985, ENSRNOG00000014597, ENSRNOG00000014117, ENSRNOG00000010331, ENSRNOG00000027954, ENSRNOG00000052469, ENSRNOG00000054420, ENSRNOG00000032871, ENSRNOG00000004890
CC	GO:0043197	dendritic spine	14	0.00291561	0.0424847	ENSRNOG00000006997, ENSRNOG00000002001, ENSRNOG00000008869, ENSRNOG00000008479, ENSRNOG00000009329, ENSRNOG00000016163, ENSRNOG00000028708, ENSRNOG00000013213, ENSRNOG00000032576, ENSRNOG00000016358, ENSRNOG00000059683, ENSRNOG00000016448, ENSRNOG00000026705, ENSRNOG00000013656
BP	GO:0010976	positive regulation of neuron projection development	13	0.00298545	0.153317	ENSRNOG00000008869, ENSRNOG00000004438, ENSRNOG00000011227, ENSRNOG00000016050, ENSRNOG00000018454, ENSRNOG00000001628, ENSRNOG00000015461, ENSRNOG00000019024, ENSRNOG00000033099, ENSRNOG00000011150, ENSRNOG00000014751, ENSRNOG00000018445, ENSRNOG00000008223
BP	GO:0030335	positive regulation of cell migration	17	0.00325859	0.163408	ENSRNOG00000028930, ENSRNOG00000008816, ENSRNOG00000002244, ENSRNOG00000011977, ENSRNOG00000046261, ENSRNOG00000002667, ENSRNOG00000018461, ENSRNOG00000004912, ENSRNOG00000013213, ENSRNOG00000018414, ENSRNOG00000014751, ENSRNOG00000008095, ENSRNOG00000014597, ENSRNOG00000046829, ENSRNOG00000013589, ENSRNOG00000018659, ENSRNOG00000005033
CC	GO:0030054	cell junction	14	0.00330924	0.0465576	ENSRNOG00000022060, ENSRNOG00000002244, ENSRNOG00000004498, ENSRNOG00000005933, ENSRNOG00000006966, ENSRNOG00000003537, ENSRNOG00000010037, ENSRNOG00000015880, ENSRNOG00000015562, ENSRNOG00000020129, ENSRNOG00000046829, ENSRNOG00000047605, ENSRNOG00000020151, ENSRNOG00000028872
BP	GO:1900272	negative regulation of long-term synaptic potentiation	4	0.00339658	0.163408	ENSRNOG00000006997, ENSRNOG00000008869, ENSRNOG00000013213, ENSRNOG00000018454
BP	GO:1904383	response to sodium phosphate	4	0.00339658	0.163408	ENSRNOG00000010997, ENSRNOG00000013994, ENSRNOG00000010960, ENSRNOG00000016050
BP	GO:0031175	neuron projection development	13	0.00341739	0.163408	ENSRNOG00000006997, ENSRNOG00000050220, ENSRNOG00000008869, ENSRNOG00000004438, ENSRNOG00000031890, ENSRNOG00000016050, ENSRNOG00000018454, ENSRNOG00000032576, ENSRNOG00000047605, ENSRNOG00000009390, ENSRNOG00000048651, ENSRNOG00000006761, ENSRNOG00000020151
BP	GO:0045471	response to ethanol	15	0.00344283	0.163408	ENSRNOG00000060806, ENSRNOG00000046261, ENSRNOG00000008943, ENSRNOG00000010331, ENSRNOG00000019120, ENSRNOG00000018053, ENSRNOG00000018454, ENSRNOG00000016374, ENSRNOG00000018991, ENSRNOG00000014254, ENSRNOG00000020369, ENSRNOG00000015615, ENSRNOG00000008223, ENSRNOG00000021155, ENSRNOG00000046643
BP	GO:0009612	response to mechanical stimulus	10	0.00350833	0.163408	ENSRNOG00000018414, ENSRNOG00000007546, ENSRNOG00000013994, ENSRNOG00000046261, ENSRNOG00000013589, ENSRNOG00000018659, ENSRNOG00000015615, ENSRNOG00000010331, ENSRNOG00000008478, ENSRNOG00000005695
BP	GO:0042476	odontogenesis	7	0.00354118	0.163408	ENSRNOG00000033280, ENSRNOG00000059947, ENSRNOG00000013994, ENSRNOG00000018659, ENSRNOG00000018487, ENSRNOG00000016374, ENSRNOG00000052510
CC	GO:0030027	lamellipodium	13	0.00363558	0.0494439	ENSRNOG00000002001, ENSRNOG00000008869, ENSRNOG00000002146, ENSRNOG00000018350, ENSRNOG00000000936, ENSRNOG00000018991, ENSRNOG00000017500, ENSRNOG00000029071, ENSRNOG00000006003, ENSRNOG00000005386, ENSRNOG00000020151, ENSRNOG00000008990, ENSRNOG00000003088
MF	GO:0050431	transforming growth factor beta binding	5	0.00373457	0.193202	ENSRNOG00000002831, ENSRNOG00000004912, ENSRNOG00000002093, ENSRNOG00000005033, ENSRNOG00000027784
BP	GO:0007162	negative regulation of cell adhesion	7	0.00387119	0.176084	ENSRNOG00000011977, ENSRNOG00000016502, ENSRNOG00000046261, ENSRNOG00000042848, ENSRNOG00000013213, ENSRNOG00000030387, ENSRNOG00000017003
BP	GO:2001199	negative regulation of dendritic cell differentiation	3	0.00405239	0.176751	ENSRNOG00000008465, ENSRNOG00000014592, ENSRNOG00000023708
BP	GO:2000741	positive regulation of mesenchymal stem cell differentiation	3	0.00405239	0.176751	ENSRNOG00000020514, ENSRNOG00000027869, ENSRNOG00000002607
BP	GO:1900155	negative regulation of bone trabecula formation	3	0.00405239	0.176751	ENSRNOG00000026053, ENSRNOG00000003304, ENSRNOG00000054420
BP	GO:0045893	positive regulation of transcription, DNA-templated	33	0.0043043	0.185201	ENSRNOG00000053787, ENSRNOG00000020060, ENSRNOG00000003443, ENSRNOG00000000299, ENSRNOG00000016280, ENSRNOG00000010259, ENSRNOG00000009329, ENSRNOG00000018322, ENSRNOG00000033099, ENSRNOG00000013670, ENSRNOG00000016102, ENSRNOG00000016289, ENSRNOG00000046912, ENSRNOG00000018445, ENSRNOG00000017414, ENSRNOG00000018427, ENSRNOG00000015911, ENSRNOG00000026053, ENSRNOG00000005933, ENSRNOG00000006966,…
CC	GO:0005764	lysosome	18	0.00432923	0.0569782	ENSRNOG00000006997, ENSRNOG00000046261, ENSRNOG00000016262, ENSRNOG00000010331, ENSRNOG00000018454, ENSRNOG00000000913, ENSRNOG00000032871, ENSRNOG00000037563, ENSRNOG00000020206, ENSRNOG00000011150, ENSRNOG00000012062, ENSRNOG00000005195, ENSRNOG00000021155, ENSRNOG00000008478, ENSRNOG00000022983, ENSRNOG00000021157, ENSRNOG00000046159, ENSRNOG00000007089
BP	GO:0051402	neuron apoptotic process	9	0.00476952	0.201507	ENSRNOG00000006997, ENSRNOG00000002001, ENSRNOG00000027233, ENSRNOG00000018445, ENSRNOG00000013994, ENSRNOG00000000368, ENSRNOG00000010640, ENSRNOG00000020716, ENSRNOG00000014660
BP	GO:0018108	peptidyl-tyrosine phosphorylation	11	0.00480984	0.201507	ENSRNOG00000018414, ENSRNOG00000014751, ENSRNOG00000002244, ENSRNOG00000046829, ENSRNOG00000002511, ENSRNOG00000018461, ENSRNOG00000016050, ENSRNOG00000013213, ENSRNOG00000020716, ENSRNOG00000005386, ENSRNOG00000016374
BP	GO:0048286	lung alveolus development	7	0.00499815	0.206677	ENSRNOG00000046829, ENSRNOG00000002511, ENSRNOG00000017206, ENSRNOG00000009390, ENSRNOG00000054508, ENSRNOG00000010210, ENSRNOG00000016374
CC	GO:0048471	perinuclear region of cytoplasm	33	0.00502695	0.0640936	ENSRNOG00000006997, ENSRNOG00000049484, ENSRNOG00000005985, ENSRNOG00000049282, ENSRNOG00000011107, ENSRNOG00000001766, ENSRNOG00000010331, ENSRNOG00000018322, ENSRNOG00000016483, ENSRNOG00000013791, ENSRNOG00000018126, ENSRNOG00000026705, ENSRNOG00000020284, ENSRNOG00000007089, ENSRNOG00000006645, ENSRNOG00000012727, ENSRNOG00000028930, ENSRNOG00000002667, ENSRNOG00000000886, ENSRNOG00000016050,…
MF	GO:0050750	low-density lipoprotein particle receptor binding	5	0.00503398	0.244148	ENSRNOG00000006997, ENSRNOG00000028930, ENSRNOG00000008478, ENSRNOG00000018454, ENSRNOG00000018322
BP	GO:0034097	response to cytokine	9	0.00506754	0.20686	ENSRNOG00000015654, ENSRNOG00000002244, ENSRNOG00000046261, ENSRNOG00000046487, ENSRNOG00000015615, ENSRNOG00000010331, ENSRNOG00000011696, ENSRNOG00000009263, ENSRNOG00000020196
BP	GO:0010039	response to iron ion	5	0.00525607	0.21184	ENSRNOG00000001766, ENSRNOG00000007041, ENSRNOG00000001407, ENSRNOG00000013717, ENSRNOG00000012807
BP	GO:0046622	positive regulation of organ growth	4	0.00540283	0.215033	ENSRNOG00000018445, ENSRNOG00000005933, ENSRNOG00000020369, ENSRNOG00000005480
BP	GO:0045669	positive regulation of osteoblast differentiation	8	0.00563199	0.221386	ENSRNOG00000016289, ENSRNOG00000005933, ENSRNOG00000015911, ENSRNOG00000001314, ENSRNOG00000052469, ENSRNOG00000013717, ENSRNOG00000051993, ENSRNOG00000005033
MF	GO:0005158	insulin receptor binding	5	0.00578445	0.264043	ENSRNOG00000006997, ENSRNOG00000019977, ENSRNOG00000014597, ENSRNOG00000013994, ENSRNOG00000020369
CC	GO:0060076	excitatory synapse	6	0.00600244	0.0742119	ENSRNOG00000019977, ENSRNOG00000026705, ENSRNOG00000003715, ENSRNOG00000032576, ENSRNOG00000016374, ENSRNOG00000004890
BP	GO:0006883	cellular sodium ion homeostasis	5	0.00600587	0.228224	ENSRNOG00000018445, ENSRNOG00000008479, ENSRNOG00000011227, ENSRNOG00000043451, ENSRNOG00000016163
BP	GO:0016339	calcium-dependent cell-cell adhesion via plasma membrane cell adhesion molecules	5	0.00600587	0.228224	ENSRNOG00000050220, ENSRNOG00000032490, ENSRNOG00000032576, ENSRNOG00000020151, ENSRNOG00000015562
BP	GO:0071320	cellular response to cAMP	8	0.00602097	0.228224	ENSRNOG00000006997, ENSRNOG00000009848, ENSRNOG00000002146, ENSRNOG00000008479, ENSRNOG00000013994, ENSRNOG00000016448, ENSRNOG00000017206, ENSRNOG00000008943
BP	GO:0048469	cell maturation	6	0.00651553	0.242853	ENSRNOG00000021318, ENSRNOG00000005985, ENSRNOG00000046829, ENSRNOG00000012347, ENSRNOG00000016050, ENSRNOG00000020716
MF	GO:0019955	cytokine binding	6	0.00662455	0.280073	ENSRNOG00000018414, ENSRNOG00000015654, ENSRNOG00000032973, ENSRNOG00000046487, ENSRNOG00000015615, ENSRNOG00000011696
BP	GO:0097241	hematopoietic stem cell migration to bone marrow	3	0.00663574	0.242853	ENSRNOG00000013994, ENSRNOG00000042848, ENSRNOG00000018233
BP	GO:0071344	diphosphate metabolic process	3	0.00663574	0.242853	ENSRNOG00000013994, ENSRNOG00000010960, ENSRNOG00000016050
MF	GO:0005025	transforming growth factor beta receptor activity, type I	3	0.00699875	0.280073	ENSRNOG00000016289, ENSRNOG00000052469, ENSRNOG00000005033
BP	GO:0010811	positive regulation of cell-substrate adhesion	6	0.00715457	0.258865	ENSRNOG00000002167, ENSRNOG00000019183, ENSRNOG00000004706, ENSRNOG00000043451, ENSRNOG00000002052, ENSRNOG00000033064
MF	GO:0008092	cytoskeletal protein binding	7	0.00721839	0.280073	ENSRNOG00000002146, ENSRNOG00000049452, ENSRNOG00000008479, ENSRNOG00000056550, ENSRNOG00000031890, ENSRNOG00000007041, ENSRNOG00000020151
CC	GO:0045121	membrane raft	17	0.00757145	0.0908574	ENSRNOG00000027233, ENSRNOG00000006997, ENSRNOG00000010997, ENSRNOG00000004438, ENSRNOG00000003999, ENSRNOG00000028708, ENSRNOG00000000936, ENSRNOG00000032871, ENSRNOG00000033099, ENSRNOG00000020206, ENSRNOG00000014751, ENSRNOG00000018126, ENSRNOG00000046829, ENSRNOG00000008223, ENSRNOG00000009037, ENSRNOG00000007041, ENSRNOG00000004890
BP	GO:0045453	bone resorption	5	0.00771159	0.272943	ENSRNOG00000013994, ENSRNOG00000011944, ENSRNOG00000046261, ENSRNOG00000021155, ENSRNOG00000021157
BP	GO:0043066	negative regulation of apoptotic process	27	0.0077151	0.272943	ENSRNOG00000007546, ENSRNOG00000020060, ENSRNOG00000010997, ENSRNOG00000002511, ENSRNOG00000018461, ENSRNOG00000001766, ENSRNOG00000028708, ENSRNOG00000020716, ENSRNOG00000022839, ENSRNOG00000016289, ENSRNOG00000016448, ENSRNOG00000018427, ENSRNOG00000005480, ENSRNOG00000005386, ENSRNOG00000021097, ENSRNOG00000006302, ENSRNOG00000028930, ENSRNOG00000026053, ENSRNOG00000060806, ENSRNOG00000013017,…
BP	GO:0006958	complement activation, classical pathway	7	0.00794724	0.27362	ENSRNOG00000007457, ENSRNOG00000012749, ENSRNOG00000012804, ENSRNOG00000024115, ENSRNOG00000051235, ENSRNOG00000012807
BP	GO:0097028	dendritic cell differentiation	4	0.00799203	0.27362	ENSRNOG00000008465, ENSRNOG00000020716, ENSRNOG00000014592, ENSRNOG00000018233
BP	GO:0015671	oxygen transport	4	0.00799203	0.27362	ENSRNOG00000020536, ENSRNOG00000029886, ENSRNOG00000010133, ENSRNOG00000047321
MF	GO:0003700	transcription factor activity, sequence-specific DNA binding	23	0.00804828	0.297403	ENSRNOG00000000691, ENSRNOG00000020060, ENSRNOG00000003443, ENSRNOG00000000299, ENSRNOG00000006966, ENSRNOG00000010259, ENSRNOG00000009329, ENSRNOG00000012347, ENSRNOG00000013017, ENSRNOG00000002607, ENSRNOG00000054420, ENSRNOG00000017198, ENSRNOG00000013670, ENSRNOG00000020514, ENSRNOG00000021318, ENSRNOG00000046912, ENSRNOG00000014256, ENSRNOG00000008095, ENSRNOG00000017748, ENSRNOG00000027869,…
BP	GO:0098609	cell-cell adhesion	12	0.0082935	0.28092	ENSRNOG00000020129, ENSRNOG00000007038, ENSRNOG00000004438, ENSRNOG00000013589, ENSRNOG00000021217, ENSRNOG00000046639, ENSRNOG00000042848, ENSRNOG00000003715, ENSRNOG00000002607, ENSRNOG00000006003, ENSRNOG00000020151, ENSRNOG00000033099
BP	GO:0048488	synaptic vesicle endocytosis	6	0.0085614	0.286942	ENSRNOG00000002001, ENSRNOG00000059510, ENSRNOG00000032576, ENSRNOG00000018322, ENSRNOG00000006761, ENSRNOG00000058006
BP	GO:0045785	positive regulation of cell adhesion	7	0.00916175	0.300528	ENSRNOG00000028930, ENSRNOG00000002158, ENSRNOG00000013589, ENSRNOG00000056550, ENSRNOG00000004912, ENSRNOG00000013213, ENSRNOG00000023881
BP	GO:0060348	bone development	8	0.00932861	0.300528	ENSRNOG00000016289, ENSRNOG00000018778, ENSRNOG00000013994, ENSRNOG00000015911, ENSRNOG00000003304, ENSRNOG00000009037, ENSRNOG00000011068, ENSRNOG00000016374
BP	GO:0008285	negative regulation of cell proliferation	22	0.00947986	0.300528	ENSRNOG00000006997, ENSRNOG00000007765, ENSRNOG00000020060, ENSRNOG00000004498, ENSRNOG00000010588, ENSRNOG00000002607, ENSRNOG00000016374, ENSRNOG00000054420, ENSRNOG00000019357, ENSRNOG00000022839, ENSRNOG00000015461, ENSRNOG00000016483, ENSRNOG00000018414, ENSRNOG00000019977, ENSRNOG00000014256, ENSRNOG00000018445, ENSRNOG00000014117, ENSRNOG00000013589, ENSRNOG00000047605, ENSRNOG00000021046,…
BP	GO:0009268	response to pH	4	0.00951635	0.300528	ENSRNOG00000033280, ENSRNOG00000005985, ENSRNOG00000011150, ENSRNOG00000009629
BP	GO:0010744	positive regulation of macrophage derived foam cell differentiation	4	0.00951635	0.300528	ENSRNOG00000009848, ENSRNOG00000018445, ENSRNOG00000012779, ENSRNOG00000018659
CC	GO:0030139	endocytic vesicle	7	0.00958958	0.111787	ENSRNOG00000002001, ENSRNOG00000050220, ENSRNOG00000018126, ENSRNOG00000060806, ENSRNOG00000052979, ENSRNOG00000013656, ENSRNOG00000021243
BP	GO:1990079	cartilage homeostasis	3	0.00977975	0.300528	ENSRNOG00000012508, ENSRNOG00000028108, ENSRNOG00000025724
BP	GO:0097114	NMDA glutamate receptor clustering	3	0.00977975	0.300528	ENSRNOG00000050220, ENSRNOG00000018454, ENSRNOG00000032576
BP	GO:1903131	mononuclear cell differentiation	3	0.00977975	0.300528	ENSRNOG00000018414, ENSRNOG00000021155, ENSRNOG00000010053
BP	GO:0006898	receptor-mediated endocytosis	7	0.00981625	0.300528	ENSRNOG00000028930, ENSRNOG00000012779, ENSRNOG00000008129, ENSRNOG00000018251, ENSRNOG00000018454, ENSRNOG00000018322, ENSRNOG00000001407
CC	GO:0043198	dendritic shaft	7	0.0102517	0.113292	ENSRNOG00000006997, ENSRNOG00000008479, ENSRNOG00000059683, ENSRNOG00000013656, ENSRNOG00000028708, ENSRNOG00000013213, ENSRNOG00000032576
CC	GO:0031410	cytoplasmic vesicle	19	0.010274	0.113292	ENSRNOG00000006997, ENSRNOG00000003276, ENSRNOG00000002146, ENSRNOG00000008816, ENSRNOG00000012779, ENSRNOG00000001963, ENSRNOG00000018461, ENSRNOG00000001766, ENSRNOG00000016050, ENSRNOG00000051854, ENSRNOG00000016374, ENSRNOG00000010682, ENSRNOG00000001407, ENSRNOG00000000936, ENSRNOG00000032871, ENSRNOG00000011381, ENSRNOG00000015306, ENSRNOG00000030904, ENSRNOG00000008990
MF	GO:0004064	arylesterase activity	3	0.0103097	0.332864	ENSRNOG00000008902, ENSRNOG00000009629, ENSRNOG00000010698
MF	GO:0038085	vascular endothelial growth factor binding	3	0.0103097	0.332864	ENSRNOG00000002244, ENSRNOG00000046829, ENSRNOG00000018461
MF	GO:0005021	vascular endothelial growth factor-activated receptor activity	3	0.0103097	0.332864	ENSRNOG00000002244, ENSRNOG00000046829, ENSRNOG00000002511
BP	GO:0070588	calcium ion transmembrane transport	9	0.0103731	0.306814	ENSRNOG00000027233, ENSRNOG00000012727, ENSRNOG00000002146, ENSRNOG00000010997, ENSRNOG00000008479, ENSRNOG00000002863, ENSRNOG00000004912, ENSRNOG00000031287, ENSRNOG00000018233
BP	GO:0006874	cellular calcium ion homeostasis	9	0.0103731	0.306814	ENSRNOG00000006645, ENSRNOG00000002146, ENSRNOG00000060806, ENSRNOG00000008479, ENSRNOG00000000368, ENSRNOG00000009390, ENSRNOG00000043451, ENSRNOG00000018454, ENSRNOG00000054420
BP	GO:0031100	animal organ regeneration	8	0.0104792	0.306814	ENSRNOG00000013589, ENSRNOG00000031890, ENSRNOG00000011696, ENSRNOG00000002093, ENSRNOG00000005480, ENSRNOG00000020716, ENSRNOG00000005650, ENSRNOG00000018233
BP	GO:0035019	somatic stem cell population maintenance	7	0.0105034	0.306814	ENSRNOG00000005933, ENSRNOG00000015911, ENSRNOG00000010259, ENSRNOG00000046487, ENSRNOG00000012347, ENSRNOG00000052469, ENSRNOG00000002607
BP	GO:0045668	negative regulation of osteoblast differentiation	7	0.0105034	0.306814	ENSRNOG00000026053, ENSRNOG00000017206, ENSRNOG00000015911, ENSRNOG00000016050, ENSRNOG00000004208, ENSRNOG00000002607, ENSRNOG00000051993
MF	GO:0005546	phosphatidylinositol-4,5-bisphosphate binding	8	0.0107237	0.332864	ENSRNOG00000017500, ENSRNOG00000028930, ENSRNOG00000016358, ENSRNOG00000004498, ENSRNOG00000019183, ENSRNOG00000018322, ENSRNOG00000004198, ENSRNOG00000018991
BP	GO:0045807	positive regulation of endocytosis	5	0.0108208	0.312842	ENSRNOG00000028930, ENSRNOG00000016448, ENSRNOG00000059510, ENSRNOG00000018454, ENSRNOG00000001407
BP	GO:0043627	response to estrogen	9	0.0109062	0.312842	ENSRNOG00000005985, ENSRNOG00000011150, ENSRNOG00000009629, ENSRNOG00000002244, ENSRNOG00000014117, ENSRNOG00000018461, ENSRNOG00000010640, ENSRNOG00000008478, ENSRNOG00000046643
CC	GO:0070161	anchoring junction	20	0.0111423	0.119633	ENSRNOG00000002001, ENSRNOG00000008869, ENSRNOG00000004498, ENSRNOG00000060329, ENSRNOG00000000368, ENSRNOG00000030910, ENSRNOG00000009329, ENSRNOG00000059510, ENSRNOG00000003715, ENSRNOG00000032576, ENSRNOG00000018487, ENSRNOG00000014862, ENSRNOG00000046829, ENSRNOG00000029071, ENSRNOG00000026705, ENSRNOG00000008223, ENSRNOG00000008203, ENSRNOG00000006761, ENSRNOG00000028872, ENSRNOG00000004890
BP	GO:0030502	negative regulation of bone mineralization	4	0.0111984	0.315537	ENSRNOG00000002154, ENSRNOG00000026053, ENSRNOG00000013994, ENSRNOG00000002607
BP	GO:0019538	protein metabolic process	4	0.0111984	0.315537	ENSRNOG00000033280, ENSRNOG00000008478, ENSRNOG00000020151, ENSRNOG00000034013
MF	GO:0005524	ATP binding	54	0.011521	0.340322	ENSRNOG00000007546, ENSRNOG00000022060, ENSRNOG00000000511, ENSRNOG00000010872, ENSRNOG00000020716, ENSRNOG00000014365, ENSRNOG00000018126, ENSRNOG00000013994, ENSRNOG00000026705, ENSRNOG00000014844, ENSRNOG00000002092, ENSRNOG00000003781, ENSRNOG00000004147, ENSRNOG00000002244, ENSRNOG00000052469, ENSRNOG00000013213, ENSRNOG00000000902, ENSRNOG00000034013, ENSRNOG00000018414, ENSRNOG00000046829,…
BP	GO:0071277	cellular response to calcium ion	8	0.0117297	0.327609	ENSRNOG00000050220, ENSRNOG00000002146, ENSRNOG00000019183, ENSRNOG00000016448, ENSRNOG00000032576, ENSRNOG00000015880, ENSRNOG00000007089, ENSRNOG00000004890
BP	GO:0010043	response to zinc ion	6	0.0119269	0.33022	ENSRNOG00000033280, ENSRNOG00000009629, ENSRNOG00000030449, ENSRNOG00000046261, ENSRNOG00000018454, ENSRNOG00000046643
MF	GO:0004867	serine-type endopeptidase inhibitor activity	9	0.0120675	0.340322	ENSRNOG00000006997, ENSRNOG00000028896, ENSRNOG00000018445, ENSRNOG00000007457, ENSRNOG00000010478, ENSRNOG00000002831, ENSRNOG00000001865, ENSRNOG00000004208, ENSRNOG00000015461
MF	GO:0005044	scavenger receptor activity	6	0.0122797	0.340322	ENSRNOG00000022737, ENSRNOG00000018434, ENSRNOG00000013994, ENSRNOG00000012779, ENSRNOG00000003217, ENSRNOG00000010253
BP	GO:0050804	modulation of synaptic transmission	8	0.0123938	0.337279	ENSRNOG00000008869, ENSRNOG00000000368, ENSRNOG00000030910, ENSRNOG00000031890, ENSRNOG00000010210, ENSRNOG00000032576, ENSRNOG00000020284, ENSRNOG00000004890
BP	GO:0007596	blood coagulation	7	0.0127684	0.337279	ENSRNOG00000007457, ENSRNOG00000014118, ENSRNOG00000001865, ENSRNOG00000011068, ENSRNOG00000030387, ENSRNOG00000015461, ENSRNOG00000018233
BP	GO:2000648	positive regulation of stem cell proliferation	6	0.0128906	0.337279	ENSRNOG00000005933, ENSRNOG00000046829, ENSRNOG00000016050, ENSRNOG00000002607, ENSRNOG00000016374, ENSRNOG00000013670
BP	GO:0035556	intracellular signal transduction	20	0.0129205	0.337279	ENSRNOG00000028404, ENSRNOG00000010588, ENSRNOG00000000511, ENSRNOG00000018461, ENSRNOG00000001766, ENSRNOG00000003999, ENSRNOG00000014182, ENSRNOG00000051169, ENSRNOG00000039323, ENSRNOG00000031397, ENSRNOG00000017332, ENSRNOG00000017511, ENSRNOG00000017765, ENSRNOG00000017206, ENSRNOG00000026705, ENSRNOG00000014117, ENSRNOG00000002092, ENSRNOG00000002093, ENSRNOG00000020322, ENSRNOG00000004890
BP	GO:0060391	positive regulation of SMAD protein import into nucleus	4	0.0130409	0.337279	ENSRNOG00000028930, ENSRNOG00000046487, ENSRNOG00000052469, ENSRNOG00000013717
BP	GO:0032355	response to estradiol	13	0.0131024	0.337279	ENSRNOG00000002792, ENSRNOG00000002244, ENSRNOG00000008943, ENSRNOG00000018461, ENSRNOG00000013017, ENSRNOG00000054420, ENSRNOG00000033280, ENSRNOG00000018445, ENSRNOG00000015654, ENSRNOG00000020369, ENSRNOG00000005195, ENSRNOG00000009263, ENSRNOG00000046643
BP	GO:0010951	negative regulation of endopeptidase activity	11	0.0131394	0.337279	ENSRNOG00000006997, ENSRNOG00000028896, ENSRNOG00000018445, ENSRNOG00000007457, ENSRNOG00000010478, ENSRNOG00000002831, ENSRNOG00000001865, ENSRNOG00000004208, ENSRNOG00000005178, ENSRNOG00000030387, ENSRNOG00000015461
MF	GO:0042803	protein homodimerization activity	31	0.0131504	0.351888	ENSRNOG00000006997, ENSRNOG00000030449, ENSRNOG00000002511, ENSRNOG00000001762, ENSRNOG00000001766, ENSRNOG00000015654, ENSRNOG00000018627, ENSRNOG00000013994, ENSRNOG00000016502, ENSRNOG00000054508, ENSRNOG00000007041, ENSRNOG00000004890, ENSRNOG00000008902, ENSRNOG00000002146, ENSRNOG00000026053, ENSRNOG00000002244, ENSRNOG00000002964, ENSRNOG00000016050, ENSRNOG00000052469, ENSRNOG00000018053,…
CC	GO:0099056	integral component of presynaptic membrane	8	0.0131784	0.137866	ENSRNOG00000018778, ENSRNOG00000050220, ENSRNOG00000002863, ENSRNOG00000030910, ENSRNOG00000031890, ENSRNOG00000008223, ENSRNOG00000013213, ENSRNOG00000004890
BP	GO:0097485	neuron projection guidance	3	0.013453	0.337279	ENSRNOG00000011977, ENSRNOG00000013213, ENSRNOG00000017003
BP	GO:0071529	cementum mineralization	3	0.013453	0.337279	ENSRNOG00000013994, ENSRNOG00000010960, ENSRNOG00000016050
BP	GO:2000669	negative regulation of dendritic cell apoptotic process	3	0.013453	0.337279	ENSRNOG00000013589, ENSRNOG00000020716, ENSRNOG00000018233
BP	GO:0045650	negative regulation of macrophage differentiation	3	0.013453	0.337279	ENSRNOG00000012804, ENSRNOG00000012347, ENSRNOG00000014592
BP	GO:0010544	negative regulation of platelet activation	3	0.013453	0.337279	ENSRNOG00000002244, ENSRNOG00000018454, ENSRNOG00000015461
BP	GO:0008542	visual learning	7	0.0144562	0.355854	ENSRNOG00000006997, ENSRNOG00000017511, ENSRNOG00000060806, ENSRNOG00000002863, ENSRNOG00000028404, ENSRNOG00000019181, ENSRNOG00000010210
BP	GO:0050679	positive regulation of epithelial cell proliferation	8	0.0145484	0.355854	ENSRNOG00000005933, ENSRNOG00000046829, ENSRNOG00000054508, ENSRNOG00000009730, ENSRNOG00000052469, ENSRNOG00000002607, ENSRNOG00000016374, ENSRNOG00000013717
BP	GO:0021983	pituitary gland development	5	0.014641	0.355854	ENSRNOG00000011107, ENSRNOG00000018427, ENSRNOG00000012347, ENSRNOG00000052469, ENSRNOG00000020151
BP	GO:0006836	neurotransmitter transport	5	0.014641	0.355854	ENSRNOG00000022946, ENSRNOG00000017506, ENSRNOG00000016163, ENSRNOG00000027468, ENSRNOG00000019752
BP	GO:0046718	viral entry into host cell	6	0.0149728	0.357507	ENSRNOG00000021243, ENSRNOG00000010331, ENSRNOG00000004912, ENSRNOG00000018487, ENSRNOG00000020716, ENSRNOG00000018233
BP	GO:0071498	cellular response to fluid shear stress	4	0.0150458	0.357507	ENSRNOG00000009629, ENSRNOG00000002146, ENSRNOG00000043451, ENSRNOG00000008478
BP	GO:0042445	hormone metabolic process	4	0.0150458	0.357507	ENSRNOG00000018445, ENSRNOG00000015654, ENSRNOG00000013994, ENSRNOG00000011068
CC	GO:0005911	cell-cell junction	13	0.0158629	0.161802	ENSRNOG00000006997, ENSRNOG00000022060, ENSRNOG00000002146, ENSRNOG00000031890, ENSRNOG00000000936, ENSRNOG00000032871, ENSRNOG00000014660, ENSRNOG00000018778, ENSRNOG00000059683, ENSRNOG00000047605, ENSRNOG00000021097, ENSRNOG00000023881, ENSRNOG00000020151
BP	GO:0009636	response to toxic substance	9	0.015926	0.375619	ENSRNOG00000059947, ENSRNOG00000008902, ENSRNOG00000007546, ENSRNOG00000008943, ENSRNOG00000018461, ENSRNOG00000005195, ENSRNOG00000010210, ENSRNOG00000017286, ENSRNOG00000020151
BP	GO:0008217	regulation of blood pressure	7	0.0162933	0.379193	ENSRNOG00000018445, ENSRNOG00000010997, ENSRNOG00000014610, ENSRNOG00000014117, ENSRNOG00000015911, ENSRNOG00000051854, ENSRNOG00000010640
BP	GO:0006915	apoptotic process	21	0.0163158	0.379193	ENSRNOG00000030069, ENSRNOG00000028930, ENSRNOG00000026053, ENSRNOG00000000299, ENSRNOG00000002607, ENSRNOG00000020716, ENSRNOG00000017198, ENSRNOG00000018991, ENSRNOG00000015880, ENSRNOG00000033099, ENSRNOG00000014660, ENSRNOG00000018233, ENSRNOG00000018414, ENSRNOG00000029071, ENSRNOG00000018427, ENSRNOG00000005195, ENSRNOG00000024457, ENSRNOG00000008885, ENSRNOG00000005480, ENSRNOG00000005386,…
BP	GO:0009617	response to bacterium	13	0.0165463	0.381764	ENSRNOG00000029886, ENSRNOG00000037198, ENSRNOG00000049282, ENSRNOG00000015403, ENSRNOG00000001963, ENSRNOG00000008943, ENSRNOG00000019120, ENSRNOG00000023257, ENSRNOG00000002052, ENSRNOG00000051235, ENSRNOG00000022839, ENSRNOG00000050784
CC	GO:0030132	clathrin coat of coated pit	3	0.016975	0.1649	ENSRNOG00000028930, ENSRNOG00000017506, ENSRNOG00000018322
CC	GO:0099026	anchored component of presynaptic membrane	3	0.016975	0.1649	ENSRNOG00000007038, ENSRNOG00000004438, ENSRNOG00000002413
BP	GO:0051649	establishment of localization in cell	12	0.0171884	0.387031	ENSRNOG00000022946, ENSRNOG00000028930, ENSRNOG00000018126, ENSRNOG00000002146, ENSRNOG00000061582, ENSRNOG00000013994, ENSRNOG00000002863, ENSRNOG00000011944, ENSRNOG00000012779, ENSRNOG00000002964, ENSRNOG00000056781, ENSRNOG00000020716
BP	GO:0032332	positive regulation of chondrocyte differentiation	4	0.0172149	0.387031	ENSRNOG00000020514, ENSRNOG00000027869, ENSRNOG00000002607, ENSRNOG00000013717
BP	GO:0006811	ion transport	6	0.0172687	0.387031	ENSRNOG00000011913, ENSRNOG00000017976, ENSRNOG00000030910, ENSRNOG00000009005, ENSRNOG00000027049, ENSRNOG00000010682
MF	GO:0050839	cell adhesion molecule binding	7	0.017327	0.448191	ENSRNOG00000019977, ENSRNOG00000018778, ENSRNOG00000050220, ENSRNOG00000016050, ENSRNOG00000018350, ENSRNOG00000032576, ENSRNOG00000020151
BP	GO:0032496	response to lipopolysaccharide	15	0.0175311	0.387031	ENSRNOG00000001990, ENSRNOG00000010997, ENSRNOG00000011107, ENSRNOG00000046261, ENSRNOG00000008943, ENSRNOG00000016374, ENSRNOG00000051235, ENSRNOG00000018414, ENSRNOG00000034191, ENSRNOG00000018659, ENSRNOG00000015615, ENSRNOG00000008223, ENSRNOG00000007041, ENSRNOG00000020196
BP	GO:0060999	positive regulation of dendritic spine development	5	0.0176064	0.387031	ENSRNOG00000002001, ENSRNOG00000008869, ENSRNOG00000013656, ENSRNOG00000018454, ENSRNOG00000032576
BP	GO:0060349	bone morphogenesis	5	0.0176064	0.387031	ENSRNOG00000046261, ENSRNOG00000015911, ENSRNOG00000008478, ENSRNOG00000016374, ENSRNOG00000042860
BP	GO:1902961	positive regulation of aspartic-type endopeptidase activity involved in amyloid precursor protein catabolic process	3	0.0176255	0.387031	ENSRNOG00000006997, ENSRNOG00000013213, ENSRNOG00000018322
CC	GO:0043195	terminal bouton	9	0.017827	0.166218	ENSRNOG00000006997, ENSRNOG00000002001, ENSRNOG00000005985, ENSRNOG00000061582, ENSRNOG00000000368, ENSRNOG00000030910, ENSRNOG00000016628, ENSRNOG00000059510, ENSRNOG00000028708
CC	GO:0044853	plasma membrane raft	5	0.0180089	0.166218	ENSRNOG00000003276, ENSRNOG00000023881, ENSRNOG00000020284, ENSRNOG00000050024, ENSRNOG00000004890
BP	GO:0045944	positive regulation of transcription from RNA polymerase II promoter	47	0.0183278	0.399697	ENSRNOG00000006997, ENSRNOG00000000691, ENSRNOG00000009848, ENSRNOG00000020060, ENSRNOG00000003443, ENSRNOG00000000299, ENSRNOG00000028108, ENSRNOG00000010259, ENSRNOG00000009329, ENSRNOG00000037436, ENSRNOG00000017198, ENSRNOG00000001407, ENSRNOG00000013670, ENSRNOG00000021318, ENSRNOG00000016102, ENSRNOG00000016289, ENSRNOG00000046912, ENSRNOG00000008095, ENSRNOG00000017414, ENSRNOG00000020369,…
CC	GO:0005905	clathrin-coated pit	6	0.0183328	0.166218	ENSRNOG00000006997, ENSRNOG00000002001, ENSRNOG00000028930, ENSRNOG00000001766, ENSRNOG00000018322, ENSRNOG00000004890
MF	GO:0036122	BMP binding	4	0.0185039	0.450144	ENSRNOG00000016289, ENSRNOG00000026053, ENSRNOG00000052469, ENSRNOG00000003616
BP	GO:0006979	response to oxidative stress	10	0.0185548	0.401895	ENSRNOG00000006997, ENSRNOG00000021318, ENSRNOG00000006302, ENSRNOG00000014117, ENSRNOG00000025724, ENSRNOG00000005195, ENSRNOG00000010210, ENSRNOG00000018454, ENSRNOG00000039323, ENSRNOG00000052564
MF	GO:0031720	haptoglobin binding	3	0.0185627	0.450144	ENSRNOG00000020536, ENSRNOG00000029886, ENSRNOG00000047321
BP	GO:0071773	cellular response to BMP stimulus	5	0.0192192	0.404184	ENSRNOG00000016289, ENSRNOG00000005180, ENSRNOG00000052469, ENSRNOG00000013717, ENSRNOG00000005033
BP	GO:0098742	cell-cell adhesion via plasma-membrane adhesion molecules	5	0.0192192	0.404184	ENSRNOG00000020129, ENSRNOG00000032490, ENSRNOG00000027954, ENSRNOG00000020151, ENSRNOG00000015562
BP	GO:0051924	regulation of calcium ion transport	5	0.0192192	0.404184	ENSRNOG00000018445, ENSRNOG00000008479, ENSRNOG00000013589, ENSRNOG00000010037, ENSRNOG00000054420
BP	GO:0030512	negative regulation of transforming growth factor beta receptor signaling pathway	7	0.0193413	0.404184	ENSRNOG00000008095, ENSRNOG00000000386, ENSRNOG00000012427, ENSRNOG00000002831, ENSRNOG00000008885, ENSRNOG00000002093, ENSRNOG00000027784
BP	GO:0010463	mesenchymal cell proliferation	4	0.0195491	0.404184	ENSRNOG00000046829, ENSRNOG00000016050, ENSRNOG00000002607, ENSRNOG00000016374
BP	GO:0009651	response to salt stress	4	0.0195491	0.404184	ENSRNOG00000018445, ENSRNOG00000015306, ENSRNOG00000010640, ENSRNOG00000042860
BP	GO:0006956	complement activation	4	0.0195491	0.404184	ENSRNOG00000017063, ENSRNOG00000024115, ENSRNOG00000051235
BP	GO:0031667	response to nutrient levels	11	0.0197209	0.405105	ENSRNOG00000014254, ENSRNOG00000020206, ENSRNOG00000008902, ENSRNOG00000007546, ENSRNOG00000014256, ENSRNOG00000018126, ENSRNOG00000000299, ENSRNOG00000011107, ENSRNOG00000020369, ENSRNOG00000005195, ENSRNOG00000016050
MF	GO:0008514	organic anion transmembrane transporter activity	4	0.0210019	0.493863	ENSRNOG00000022946, ENSRNOG00000017976, ENSRNOG00000016163, ENSRNOG00000007041
CC	GO:0030425	dendrite	25	0.0212409	0.186236	ENSRNOG00000027233, ENSRNOG00000030644, ENSRNOG00000005985, ENSRNOG00000008479, ENSRNOG00000008996, ENSRNOG00000011107, ENSRNOG00000009329, ENSRNOG00000010872, ENSRNOG00000028708, ENSRNOG00000016289, ENSRNOG00000029071, ENSRNOG00000047605, ENSRNOG00000016628, ENSRNOG00000004890, ENSRNOG00000008869, ENSRNOG00000008943, ENSRNOG00000030910, ENSRNOG00000000368, ENSRNOG00000052469, ENSRNOG00000013213,…
CC	GO:0031232	extrinsic component of external side of plasma membrane	3	0.0214537	0.186236	ENSRNOG00000017063, ENSRNOG00000018454, ENSRNOG00000015461
CC	GO:0099055	integral component of postsynaptic membrane	7	0.0220202	0.187172	ENSRNOG00000018778, ENSRNOG00000008479, ENSRNOG00000002863, ENSRNOG00000030910, ENSRNOG00000031890, ENSRNOG00000013213, ENSRNOG00000010682
BP	GO:0048010	vascular endothelial growth factor receptor signaling pathway	4	0.022049	0.432328	ENSRNOG00000046829, ENSRNOG00000002511, ENSRNOG00000009037, ENSRNOG00000005650
BP	GO:0090190	positive regulation of branching involved in ureteric bud morphogenesis	4	0.022049	0.432328	ENSRNOG00000018445, ENSRNOG00000026053, ENSRNOG00000010640, ENSRNOG00000002607
BP	GO:0010863	positive regulation of phospholipase C activity	3	0.0222682	0.432328	ENSRNOG00000002244, ENSRNOG00000018461, ENSRNOG00000016050
BP	GO:0006084	acetyl-CoA metabolic process	3	0.0222682	0.432328	ENSRNOG00000045636, ENSRNOG00000019120, ENSRNOG00000034013
BP	GO:0045794	negative regulation of cell volume	3	0.0222682	0.432328	ENSRNOG00000005985, ENSRNOG00000019183, ENSRNOG00000010682
BP	GO:0038007	netrin-activated signaling pathway	3	0.0222682	0.432328	ENSRNOG00000029071, ENSRNOG00000018350, ENSRNOG00000033099
BP	GO:0099054	presynapse assembly	3	0.0222682	0.432328	ENSRNOG00000018778, ENSRNOG00000050220, ENSRNOG00000007038
BP	GO:0032354	response to follicle-stimulating hormone	3	0.0222682	0.432328	ENSRNOG00000033527, ENSRNOG00000007546, ENSRNOG00000002093
BP	GO:0098712	L-glutamate import across plasma membrane	3	0.0222682	0.432328	ENSRNOG00000016163, ENSRNOG00000010210, ENSRNOG00000028708
BP	GO:0007605	sensory perception of sound	13	0.0239225	0.457183	ENSRNOG00000005985, ENSRNOG00000004398, ENSRNOG00000007038, ENSRNOG00000016050, ENSRNOG00000000316, ENSRNOG00000016163, ENSRNOG00000014660, ENSRNOG00000015024, ENSRNOG00000017511, ENSRNOG00000018478, ENSRNOG00000013994, ENSRNOG00000021097, ENSRNOG00000020151
BP	GO:0021549	cerebellum development	7	0.0239794	0.457183	ENSRNOG00000013994, ENSRNOG00000004438, ENSRNOG00000013656, ENSRNOG00000054508, ENSRNOG00000010872, ENSRNOG00000016483, ENSRNOG00000051993
BP	GO:0050885	neuromuscular process controlling balance	6	0.023995	0.457183	ENSRNOG00000006997, ENSRNOG00000005985, ENSRNOG00000050220, ENSRNOG00000017748, ENSRNOG00000056915, ENSRNOG00000016163
BP	GO:0001889	liver development	10	0.0241227	0.457183	ENSRNOG00000018778, ENSRNOG00000007546, ENSRNOG00000011913, ENSRNOG00000008095, ENSRNOG00000002146, ENSRNOG00000003443, ENSRNOG00000013994, ENSRNOG00000017976, ENSRNOG00000019120, ENSRNOG00000002093
BP	GO:0002027	regulation of heart rate	5	0.0245923	0.46019	ENSRNOG00000021318, ENSRNOG00000018445, ENSRNOG00000010997, ENSRNOG00000008479, ENSRNOG00000002863
BP	GO:0090026	positive regulation of monocyte chemotaxis	4	0.024715	0.46019	ENSRNOG00000006997, ENSRNOG00000025691, ENSRNOG00000013589, ENSRNOG00000007089
BP	GO:0043277	apoptotic cell clearance	4	0.024715	0.46019	ENSRNOG00000019183, ENSRNOG00000004912, ENSRNOG00000020716, ENSRNOG00000018233
BP	GO:0048709	oligodendrocyte differentiation	6	0.0255162	0.472346	ENSRNOG00000020514, ENSRNOG00000060806, ENSRNOG00000017748, ENSRNOG00000027869, ENSRNOG00000018454, ENSRNOG00000002607
BP	GO:0007411	axon guidance	11	0.0258339	0.475464	ENSRNOG00000018414, ENSRNOG00000007038, ENSRNOG00000008996, ENSRNOG00000011977, ENSRNOG00000029071, ENSRNOG00000016502, ENSRNOG00000004438, ENSRNOG00000013589, ENSRNOG00000060329, ENSRNOG00000013213, ENSRNOG00000033099
MF	GO:0004175	endopeptidase activity	8	0.0269012	0.61398	ENSRNOG00000033527, ENSRNOG00000020206, ENSRNOG00000011107, ENSRNOG00000057794, ENSRNOG00000010331, ENSRNOG00000023257, ENSRNOG00000008478, ENSRNOG00000013628
BP	GO:0043491	protein kinase B signaling	6	0.0270978	0.486554	ENSRNOG00000014597, ENSRNOG00000060806, ENSRNOG00000046829, ENSRNOG00000020716, ENSRNOG00000002607, ENSRNOG00000018233
BP	GO:0044691	tooth eruption	3	0.0273534	0.486554	ENSRNOG00000018414, ENSRNOG00000011944, ENSRNOG00000057794
BP	GO:0051693	actin filament capping	3	0.0273534	0.486554	ENSRNOG00000004498, ENSRNOG00000003537, ENSRNOG00000018991
BP	GO:0006779	porphyrin-containing compound biosynthetic process	3	0.0273534	0.486554	ENSRNOG00000017810, ENSRNOG00000003537, ENSRNOG00000018053
BP	GO:1902459	positive regulation of stem cell population maintenance	3	0.0273534	0.486554	ENSRNOG00000005933, ENSRNOG00000010259, ENSRNOG00000021792
BP	GO:0007158	neuron cell-cell adhesion	3	0.0273534	0.486554	ENSRNOG00000050220, ENSRNOG00000014751, ENSRNOG00000032576
BP	GO:0015804	neutral amino acid transport	4	0.0275466	0.487268	ENSRNOG00000027767, ENSRNOG00000016163, ENSRNOG00000018487, ENSRNOG00000027468
BP	GO:0009791	post-embryonic development	8	0.0281926	0.494647	ENSRNOG00000020514, ENSRNOG00000020060, ENSRNOG00000008479, ENSRNOG00000028082, ENSRNOG00000054508, ENSRNOG00000053086, ENSRNOG00000008885, ENSRNOG00000016374
BP	GO:0032868	response to insulin	9	0.0284113	0.494647	ENSRNOG00000014597, ENSRNOG00000013994, ENSRNOG00000046261, ENSRNOG00000015615, ENSRNOG00000021155, ENSRNOG00000019120, ENSRNOG00000007041, ENSRNOG00000018454, ENSRNOG00000013628
BP	GO:2001237	negative regulation of extrinsic apoptotic signaling pathway	5	0.0286297	0.494647	ENSRNOG00000006302, ENSRNOG00000028930, ENSRNOG00000005933, ENSRNOG00000004912, ENSRNOG00000005033
BP	GO:0000122	negative regulation of transcription from RNA polymerase II promoter	36	0.028642	0.494647	ENSRNOG00000006997, ENSRNOG00000010997, ENSRNOG00000000299, ENSRNOG00000009329, ENSRNOG00000013670, ENSRNOG00000021318, ENSRNOG00000015376, ENSRNOG00000046912, ENSRNOG00000020369, ENSRNOG00000054508, ENSRNOG00000027833, ENSRNOG00000005480, ENSRNOG00000009263, ENSRNOG00000033609, ENSRNOG00000013717, ENSRNOG00000021792, ENSRNOG00000028930, ENSRNOG00000060806, ENSRNOG00000005933, ENSRNOG00000004107,…
BP	GO:0042311	vasodilation	6	0.0287405	0.494647	ENSRNOG00000005985, ENSRNOG00000018445, ENSRNOG00000010997, ENSRNOG00000046829, ENSRNOG00000018454, ENSRNOG00000030387
BP	GO:0007417	central nervous system development	9	0.0295046	0.505068	ENSRNOG00000006997, ENSRNOG00000033280, ENSRNOG00000020514, ENSRNOG00000011150, ENSRNOG00000004498, ENSRNOG00000025724, ENSRNOG00000013017, ENSRNOG00000002607, ENSRNOG00000018991
MF	GO:0043548	phosphatidylinositol 3-kinase binding	4	0.0295474	0.651655	ENSRNOG00000014597, ENSRNOG00000002244, ENSRNOG00000018461, ENSRNOG00000020716
MF	GO:0008233	peptidase activity	9	0.0302314	0.651655	ENSRNOG00000020206, ENSRNOG00000057794, ENSRNOG00000010331, ENSRNOG00000051854, ENSRNOG00000008478, ENSRNOG00000021157, ENSRNOG00000021097, ENSRNOG00000014660, ENSRNOG00000007089
BP	GO:0042744	hydrogen peroxide catabolic process	4	0.0305433	0.515951	ENSRNOG00000020536, ENSRNOG00000029886, ENSRNOG00000047321, ENSRNOG00000052564
BP	GO:2001222	regulation of neuron migration	4	0.0305433	0.515951	ENSRNOG00000029071, ENSRNOG00000018350, ENSRNOG00000006003, ENSRNOG00000020151
BP	GO:0071260	cellular response to mechanical stimulus	9	0.0306265	0.515951	ENSRNOG00000009848, ENSRNOG00000018445, ENSRNOG00000006302, ENSRNOG00000032973, ENSRNOG00000013994, ENSRNOG00000020369, ENSRNOG00000010331, ENSRNOG00000002607, ENSRNOG00000013717
CC	GO:0031838	haptoglobin-hemoglobin complex	3	0.0316743	0.263737	ENSRNOG00000020536, ENSRNOG00000029886, ENSRNOG00000047321
MF	GO:0098632	protein binding involved in cell-cell adhesion	4	0.0327448	0.668683	ENSRNOG00000007038, ENSRNOG00000016502, ENSRNOG00000004438, ENSRNOG00000060329
MF	GO:0017134	fibroblast growth factor binding	4	0.0327448	0.668683	ENSRNOG00000016050, ENSRNOG00000004912, ENSRNOG00000002093, ENSRNOG00000016374
BP	GO:0060315	negative regulation of ryanodine-sensitive calcium-release channel activity	3	0.0328545	0.54769	ENSRNOG00000002146, ENSRNOG00000028746, ENSRNOG00000018937
BP	GO:1900454	positive regulation of long term synaptic depression	3	0.0328545	0.54769	ENSRNOG00000006997, ENSRNOG00000008869, ENSRNOG00000004890
BP	GO:0006954	inflammatory response	16	0.0332085	0.550707	ENSRNOG00000059947, ENSRNOG00000009848, ENSRNOG00000002792, ENSRNOG00000002964, ENSRNOG00000010640, ENSRNOG00000020716, ENSRNOG00000030387, ENSRNOG00000017286, ENSRNOG00000015880, ENSRNOG00000018414, ENSRNOG00000016289, ENSRNOG00000045636, ENSRNOG00000018659, ENSRNOG00000014118, ENSRNOG00000043451, ENSRNOG00000013717
BP	GO:0061178	regulation of insulin secretion involved in cellular response to glucose stimulus	4	0.0337042	0.551559	ENSRNOG00000050220, ENSRNOG00000002863, ENSRNOG00000015911, ENSRNOG00000009329
BP	GO:0001894	tissue homeostasis	4	0.0337042	0.551559	ENSRNOG00000005933, ENSRNOG00000018461, ENSRNOG00000002607, ENSRNOG00000034013
BP	GO:0007179	transforming growth factor beta receptor signaling pathway	7	0.0337796	0.551559	ENSRNOG00000008095, ENSRNOG00000012094, ENSRNOG00000047605, ENSRNOG00000002831, ENSRNOG00000008885, ENSRNOG00000002093, ENSRNOG00000005033
BP	GO:0046777	protein autophosphorylation	11	0.0341953	0.555499	ENSRNOG00000018414, ENSRNOG00000018478, ENSRNOG00000002244, ENSRNOG00000046829, ENSRNOG00000016448, ENSRNOG00000002511, ENSRNOG00000001314, ENSRNOG00000018461, ENSRNOG00000016050, ENSRNOG00000013213, ENSRNOG00000016374
MF	GO:0043177	organic acid binding	3	0.0345519	0.670307	ENSRNOG00000020536, ENSRNOG00000029886, ENSRNOG00000047321
MF	GO:0008235	metalloexopeptidase activity	3	0.0345519	0.670307	ENSRNOG00000021881, ENSRNOG00000001766, ENSRNOG00000001407
BP	GO:0071347	cellular response to interleukin-1	8	0.0346599	0.560189	ENSRNOG00000021318, ENSRNOG00000002792, ENSRNOG00000017546, ENSRNOG00000002244, ENSRNOG00000002964, ENSRNOG00000009329, ENSRNOG00000018454, ENSRNOG00000002607
BP	GO:0070542	response to fatty acid	5	0.0353822	0.563285	ENSRNOG00000008902, ENSRNOG00000000299, ENSRNOG00000011107, ENSRNOG00000019120, ENSRNOG00000002607
BP	GO:0070555	response to interleukin-1	5	0.0353822	0.563285	ENSRNOG00000006997, ENSRNOG00000006302, ENSRNOG00000015654, ENSRNOG00000011107, ENSRNOG00000015615
BP	GO:0051480	regulation of cytosolic calcium ion concentration	5	0.0353822	0.563285	ENSRNOG00000006645, ENSRNOG00000027233, ENSRNOG00000012727, ENSRNOG00000016628, ENSRNOG00000004890
MF	GO:0042802	identical protein binding	65	0.0363807	0.688571	ENSRNOG00000059947, ENSRNOG00000007546, ENSRNOG00000030449, ENSRNOG00000001762, ENSRNOG00000004314, ENSRNOG00000001766, ENSRNOG00000013300, ENSRNOG00000018322, ENSRNOG00000015654, ENSRNOG00000013994, ENSRNOG00000020284, ENSRNOG00000008990, ENSRNOG00000004302, ENSRNOG00000008869, ENSRNOG00000028896, ENSRNOG00000000386, ENSRNOG00000010588, ENSRNOG00000003616, ENSRNOG00000013213, ENSRNOG00000018454,…
CC	GO:0098794	postsynapse	10	0.0370221	0.3021	ENSRNOG00000006997, ENSRNOG00000012749, ENSRNOG00000012804, ENSRNOG00000014862, ENSRNOG00000008479, ENSRNOG00000028404, ENSRNOG00000018322, ENSRNOG00000019752, ENSRNOG00000020151, ENSRNOG00000012807
BP	GO:0045780	positive regulation of bone resorption	4	0.037028	0.586553	ENSRNOG00000009629, ENSRNOG00000015615, ENSRNOG00000001766, ENSRNOG00000043451
MF	GO:0001540	beta-amyloid binding	6	0.0375936	0.694587	ENSRNOG00000029886, ENSRNOG00000016358, ENSRNOG00000050706, ENSRNOG00000012779, ENSRNOG00000005195, ENSRNOG00000018454
BP	GO:0055003	cardiac myofibril assembly	3	0.0387461	0.607723	ENSRNOG00000017546, ENSRNOG00000002244, ENSRNOG00000018461
BP	GO:1990416	cellular response to brain-derived neurotrophic factor stimulus	3	0.0387461	0.607723	ENSRNOG00000014597, ENSRNOG00000016448, ENSRNOG00000006761
MF	GO:0003779	actin binding	14	0.0390414	0.699386	ENSRNOG00000027233, ENSRNOG00000005985, ENSRNOG00000049452, ENSRNOG00000019181, ENSRNOG00000003537, ENSRNOG00000010037, ENSRNOG00000057996, ENSRNOG00000016483, ENSRNOG00000018991, ENSRNOG00000017500, ENSRNOG00000025324, ENSRNOG00000028872, ENSRNOG00000004890
BP	GO:0043410	positive regulation of MAPK cascade	11	0.0394452	0.615654	ENSRNOG00000006997, ENSRNOG00000018445, ENSRNOG00000014751, ENSRNOG00000046829, ENSRNOG00000002511, ENSRNOG00000020369, ENSRNOG00000013656, ENSRNOG00000016050, ENSRNOG00000016374, ENSRNOG00000014828, ENSRNOG00000008065
MF	GO:0005319	lipid transporter activity	4	0.0396559	0.699386	ENSRNOG00000004147, ENSRNOG00000018126, ENSRNOG00000043296, ENSRNOG00000018454
BP	GO:0008344	adult locomotory behavior	6	0.0399096	0.617196	ENSRNOG00000006997, ENSRNOG00000013994, ENSRNOG00000013589, ENSRNOG00000028708, ENSRNOG00000010682, ENSRNOG00000058006
BP	GO:0001657	ureteric bud development	5	0.0403528	0.617196	ENSRNOG00000059947, ENSRNOG00000014751, ENSRNOG00000015357, ENSRNOG00000016050, ENSRNOG00000016374
CC	GO:0098686	hippocampal mossy fiber to CA3 synapse	5	0.0404447	0.323558	ENSRNOG00000000368, ENSRNOG00000030910, ENSRNOG00000006003, ENSRNOG00000006761, ENSRNOG00000004890
BP	GO:0010629	negative regulation of gene expression	18	0.0404716	0.617196	ENSRNOG00000006997, ENSRNOG00000050220, ENSRNOG00000005933, ENSRNOG00000012779, ENSRNOG00000012347, ENSRNOG00000016050, ENSRNOG00000052469, ENSRNOG00000018454, ENSRNOG00000002607, ENSRNOG00000018322, ENSRNOG00000054420, ENSRNOG00000018445, ENSRNOG00000017933, ENSRNOG00000046829, ENSRNOG00000046487, ENSRNOG00000002093, ENSRNOG00000006761, ENSRNOG00000007089
BP	GO:0033344	cholesterol efflux	4	0.0405132	0.617196	ENSRNOG00000012062, ENSRNOG00000018126, ENSRNOG00000018454, ENSRNOG00000027784
BP	GO:0090103	cochlea morphogenesis	4	0.0405132	0.617196	ENSRNOG00000018478, ENSRNOG00000007765, ENSRNOG00000002607, ENSRNOG00000021097
MF	GO:0048306	calcium-dependent protein binding	7	0.0413392	0.712872	ENSRNOG00000050220, ENSRNOG00000028896, ENSRNOG00000003276, ENSRNOG00000012697, ENSRNOG00000008478, ENSRNOG00000005695, ENSRNOG00000000936
BP	GO:0007267	cell-cell signaling	6	0.041994	0.631437	ENSRNOG00000059947, ENSRNOG00000018434, ENSRNOG00000008816, ENSRNOG00000026053, ENSRNOG00000002964, ENSRNOG00000016374
BP	GO:0006869	lipid transport	6	0.041994	0.631437	ENSRNOG00000004147, ENSRNOG00000018126, ENSRNOG00000018405, ENSRNOG00000043296, ENSRNOG00000007041, ENSRNOG00000018454
BP	GO:0050731	positive regulation of peptidyl-tyrosine phosphorylation	8	0.0420429	0.631437	ENSRNOG00000018445, ENSRNOG00000015654, ENSRNOG00000002244, ENSRNOG00000004438, ENSRNOG00000020369, ENSRNOG00000005386, ENSRNOG00000013717, ENSRNOG00000005033
CC	GO:0005833	hemoglobin complex	3	0.0434163	0.340651	ENSRNOG00000020536, ENSRNOG00000029886, ENSRNOG00000047321
BP	GO:0033138	positive regulation of peptidyl-serine phosphorylation	7	0.043988	0.648379	ENSRNOG00000006997, ENSRNOG00000050220, ENSRNOG00000018445, ENSRNOG00000001766, ENSRNOG00000027833, ENSRNOG00000018233, ENSRNOG00000010053
BP	GO:0048169	regulation of long-term neuronal synaptic plasticity	4	0.0441578	0.648379	ENSRNOG00000006997, ENSRNOG00000018445, ENSRNOG00000019181, ENSRNOG00000000368
BP	GO:0045332	phospholipid translocation	4	0.0441578	0.648379	ENSRNOG00000049484, ENSRNOG00000018126, ENSRNOG00000003781, ENSRNOG00000059215
BP	GO:0030279	negative regulation of ossification	4	0.0441578	0.648379	ENSRNOG00000013994, ENSRNOG00000002607, ENSRNOG00000054420, ENSRNOG00000010053
BP	GO:0030195	negative regulation of blood coagulation	3	0.0450037	0.648379	ENSRNOG00000018454, ENSRNOG00000030387, ENSRNOG00000015461
BP	GO:0050803	regulation of synapse structure or activity	3	0.0450037	0.648379	ENSRNOG00000006997, ENSRNOG00000019977, ENSRNOG00000001963
BP	GO:0002067	glandular epithelial cell differentiation	3	0.0450037	0.648379	ENSRNOG00000005933, ENSRNOG00000012347, ENSRNOG00000002607
BP	GO:0048339	paraxial mesoderm development	3	0.0450037	0.648379	ENSRNOG00000005933, ENSRNOG00000016050, ENSRNOG00000052469
BP	GO:0071243	cellular response to arsenic-containing substance	3	0.0450037	0.648379	ENSRNOG00000017810, ENSRNOG00000028746, ENSRNOG00000014117
BP	GO:0010862	positive regulation of pathway-restricted SMAD protein phosphorylation	5	0.0456997	0.654755	ENSRNOG00000028930, ENSRNOG00000052469, ENSRNOG00000013717, ENSRNOG00000051993, ENSRNOG00000005033
BP	GO:0006816	calcium ion transport	7	0.0458575	0.654755	ENSRNOG00000006645, ENSRNOG00000012727, ENSRNOG00000002146, ENSRNOG00000008479, ENSRNOG00000002863, ENSRNOG00000054420, ENSRNOG00000031287
BP	GO:0042472	inner ear morphogenesis	6	0.0463567	0.658927	ENSRNOG00000007765, ENSRNOG00000056915, ENSRNOG00000012347, ENSRNOG00000016050, ENSRNOG00000000316, ENSRNOG00000016374
MF	GO:0043394	proteoglycan binding	3	0.047284	0.797661	ENSRNOG00000021155, ENSRNOG00000010331, ENSRNOG00000021157
BP	GO:0050727	regulation of inflammatory response	7	0.0477757	0.675681	ENSRNOG00000018414, ENSRNOG00000046912, ENSRNOG00000018445, ENSRNOG00000037198, ENSRNOG00000019183, ENSRNOG00000002964, ENSRNOG00000020196
BP	GO:0002009	morphogenesis of an epithelium	4	0.0479598	0.675681	ENSRNOG00000009629, ENSRNOG00000026371, ENSRNOG00000013994, ENSRNOG00000002607
BP	GO:0001934	positive regulation of protein phosphorylation	13	0.0484826	0.680038	ENSRNOG00000006997, ENSRNOG00000028930, ENSRNOG00000008816, ENSRNOG00000010997, ENSRNOG00000002511, ENSRNOG00000001766, ENSRNOG00000002607, ENSRNOG00000019005, ENSRNOG00000018233, ENSRNOG00000018414, ENSRNOG00000046829, ENSRNOG00000020369, ENSRNOG00000005650
BP	GO:0032869	cellular response to insulin stimulus	9	0.0494912	0.681929	ENSRNOG00000006302, ENSRNOG00000014597, ENSRNOG00000015654, ENSRNOG00000013994, ENSRNOG00000016448, ENSRNOG00000009832, ENSRNOG00000020420, ENSRNOG00000019120, ENSRNOG00000015880
MF	GO:0008083	growth factor activity	9	0.0495631	0.803535	ENSRNOG00000020369, ENSRNOG00000013589, ENSRNOG00000018659, ENSRNOG00000048651, ENSRNOG00000005650, ENSRNOG00000005386, ENSRNOG00000013717, ENSRNOG00000051993, ENSRNOG00000018233

## Sheet: 14d down GO
Table S7. Gene Ontology analysis of down-regulated genes in the Dex 14d group. Terms with p values smaller than 0.05 were regarded as statistically significant enriched. Statistical test method: hypergeometric test / Fisher's exact test. FDR correction method: Benjamini and Hochberg.
Ontology	ID	Term	Input number	p value	Corrected p Value	Genes
CC	GO:0009897	external side of plasma membrane	57	3.13967e-13	1.67658e-10	ENSRNOG00000030246, ENSRNOG00000001005, ENSRNOG00000003866, ENSRNOG00000034164, ENSRNOG00000018488, ENSRNOG00000015773, ENSRNOG00000038286, ENSRNOG00000020125, ENSRNOG00000007664, ENSRNOG00000024000, ENSRNOG00000011917, ENSRNOG00000054764, ENSRNOG00000050000, ENSRNOG00000022071, ENSRNOG00000059538, ENSRNOG00000006604, ENSRNOG00000010665, ENSRNOG00000005954, ENSRNOG00000010584, ENSRNOG00000056783,…
BP	GO:0050853	B cell receptor signaling pathway	21	2.81723e-12	9.46588e-09	ENSRNOG00000025990, ENSRNOG00000050000, ENSRNOG00000009705, ENSRNOG00000049870, ENSRNOG00000003069, ENSRNOG00000036829, ENSRNOG00000010798, ENSRNOG00000000655, ENSRNOG00000051986, ENSRNOG00000018311, ENSRNOG00000058590, ENSRNOG00000020945, ENSRNOG00000001908, ENSRNOG00000012160, ENSRNOG00000012061, ENSRNOG00000020125, ENSRNOG00000034190, ENSRNOG00000008180, ENSRNOG00000052407, ENSRNOG00000013967,…
BP	GO:0030183	B cell differentiation	21	2.37191e-11	3.9848e-08	ENSRNOG00000004444, ENSRNOG00000054764, ENSRNOG00000007049, ENSRNOG00000004630, ENSRNOG00000055858, ENSRNOG00000003954, ENSRNOG00000004623, ENSRNOG00000034025, ENSRNOG00000000655, ENSRNOG00000051986, ENSRNOG00000055597, ENSRNOG00000034164, ENSRNOG00000020945, ENSRNOG00000012160, ENSRNOG00000020125, ENSRNOG00000042229, ENSRNOG00000034190, ENSRNOG00000013953, ENSRNOG00000013647, ENSRNOG00000011917,…
BP	GO:0002250	adaptive immune response	24	4.85265e-11	5.43496e-08	ENSRNOG00000007129, ENSRNOG00000032844, ENSRNOG00000000451, ENSRNOG00000030246, ENSRNOG00000004630, ENSRNOG00000049491, ENSRNOG00000033215, ENSRNOG00000003666, ENSRNOG00000000454, ENSRNOG00000019374, ENSRNOG00000030431, ENSRNOG00000015994, ENSRNOG00000012160, ENSRNOG00000016434, ENSRNOG00000012061, ENSRNOG00000020125, ENSRNOG00000027839, ENSRNOG00000021546, ENSRNOG00000008180, ENSRNOG00000015945,…
BP	GO:0042113	B cell activation	13	1.38782e-09	9.87381e-07	ENSRNOG00000032247, ENSRNOG00000017181, ENSRNOG00000005404, ENSRNOG00000055597, ENSRNOG00000034230, ENSRNOG00000034164, ENSRNOG00000018488, ENSRNOG00000020945, ENSRNOG00000012061, ENSRNOG00000020125, ENSRNOG00000016846, ENSRNOG00000013967, ENSRNOG00000024000
BP	GO:0035556	intracellular signal transduction	45	1.46932e-09	9.87381e-07	ENSRNOG00000048230, ENSRNOG00000009705, ENSRNOG00000002079, ENSRNOG00000052391, ENSRNOG00000003469, ENSRNOG00000054371, ENSRNOG00000005509, ENSRNOG00000051986, ENSRNOG00000017671, ENSRNOG00000019057, ENSRNOG00000050430, ENSRNOG00000013220, ENSRNOG00000020505, ENSRNOG00000051619, ENSRNOG00000017737, ENSRNOG00000023238, ENSRNOG00000052407, ENSRNOG00000049768, ENSRNOG00000005342, ENSRNOG00000009440,…
MF	GO:0023026	MHC class II protein complex binding	9	1.28087e-08	1.12588e-05	ENSRNOG00000032844, ENSRNOG00000000451, ENSRNOG00000049491, ENSRNOG00000033215, ENSRNOG00000000454, ENSRNOG00000018735, ENSRNOG00000032708, ENSRNOG00000030431, ENSRNOG00000026762
CC	GO:0042613	MHC class II protein complex	9	1.34251e-08	3.5845e-06	ENSRNOG00000032844, ENSRNOG00000000451, ENSRNOG00000049491, ENSRNOG00000033215, ENSRNOG00000000454, ENSRNOG00000018735, ENSRNOG00000032708, ENSRNOG00000030431, ENSRNOG00000026762
BP	GO:0019886	antigen processing and presentation of exogenous peptide antigen via MHC class II	10	4.15822e-08	2.3286e-05	ENSRNOG00000032844, ENSRNOG00000000451, ENSRNOG00000049491, ENSRNOG00000033215, ENSRNOG00000000454, ENSRNOG00000018735, ENSRNOG00000017703, ENSRNOG00000032708, ENSRNOG00000030431, ENSRNOG00000026762
BP	GO:0050870	positive regulation of T cell activation	12	5.74668e-08	2.75841e-05	ENSRNOG00000032844, ENSRNOG00000009705, ENSRNOG00000000451, ENSRNOG00000033215, ENSRNOG00000006604, ENSRNOG00000000454, ENSRNOG00000017181, ENSRNOG00000032708, ENSRNOG00000019430, ENSRNOG00000030431, ENSRNOG00000026762, ENSRNOG00000019057
BP	GO:0002503	peptide antigen assembly with MHC class II protein complex	8	9.49896e-08	3.98956e-05	ENSRNOG00000032844, ENSRNOG00000000451, ENSRNOG00000049491, ENSRNOG00000033215, ENSRNOG00000000454, ENSRNOG00000032708, ENSRNOG00000030431, ENSRNOG00000026762
CC	GO:0005886	plasma membrane	240	9.95869e-08	1.45828e-05	ENSRNOG00000031930, ENSRNOG00000002013, ENSRNOG00000004317, ENSRNOG00000005404, ENSRNOG00000019490, ENSRNOG00000003469, ENSRNOG00000054371, ENSRNOG00000019374, ENSRNOG00000018286, ENSRNOG00000012852, ENSRNOG00000000636, ENSRNOG00000012178, ENSRNOG00000017874, ENSRNOG00000059140, ENSRNOG00000017635, ENSRNOG00000013953, ENSRNOG00000013836, ENSRNOG00000023077, ENSRNOG00000052064, ENSRNOG00000006604,…
CC	GO:0001772	immunological synapse	13	1.09235e-07	1.45828e-05	ENSRNOG00000002540, ENSRNOG00000032844, ENSRNOG00000009705, ENSRNOG00000033215, ENSRNOG00000034025, ENSRNOG00000019430, ENSRNOG00000019057, ENSRNOG00000017874, ENSRNOG00000020148, ENSRNOG00000020699, ENSRNOG00000014548, ENSRNOG00000008153, ENSRNOG00000024452
BP	GO:0032743	positive regulation of interleukin-2 production	12	1.99886e-07	7.46242e-05	ENSRNOG00000005434, ENSRNOG00000016434, ENSRNOG00000061070, ENSRNOG00000017181, ENSRNOG00000000655, ENSRNOG00000005905, ENSRNOG00000004409, ENSRNOG00000002968, ENSRNOG00000051986, ENSRNOG00000028541, ENSRNOG00000019057, ENSRNOG00000024452
BP	GO:0042098	T cell proliferation	14	1.00898e-06	0.000339018	ENSRNOG00000003866, ENSRNOG00000017181, ENSRNOG00000030118, ENSRNOG00000006932, ENSRNOG00000005404, ENSRNOG00000000655, ENSRNOG00000019430, ENSRNOG00000004409, ENSRNOG00000002968, ENSRNOG00000016041, ENSRNOG00000014443, ENSRNOG00000020699, ENSRNOG00000026039, ENSRNOG00000007664
BP	GO:0002381	immunoglobulin production involved in immunoglobulin mediated immune response	7	1.42339e-06	0.000434779	ENSRNOG00000032844, ENSRNOG00000000451, ENSRNOG00000033215, ENSRNOG00000000454, ENSRNOG00000032708, ENSRNOG00000030431, ENSRNOG00000026762
BP	GO:0042110	T cell activation	12	1.94986e-06	0.00054596	ENSRNOG00000007129, ENSRNOG00000030763, ENSRNOG00000038286, ENSRNOG00000013554, ENSRNOG00000012942, ENSRNOG00000006932, ENSRNOG00000005404, ENSRNOG00000020337, ENSRNOG00000019430, ENSRNOG00000019057, ENSRNOG00000050430, ENSRNOG00000024210
BP	GO:0042100	B cell proliferation	12	2.42563e-06	0.000626931	ENSRNOG00000003069, ENSRNOG00000020125, ENSRNOG00000000321, ENSRNOG00000005404, ENSRNOG00000000655, ENSRNOG00000004409, ENSRNOG00000052348, ENSRNOG00000034164, ENSRNOG00000007664, ENSRNOG00000018488, ENSRNOG00000010121, ENSRNOG00000001839
BP	GO:0002376	immune system process	10	2.68709e-06	0.000644901	ENSRNOG00000016378, ENSRNOG00000012160, ENSRNOG00000008941, ENSRNOG00000061070, ENSRNOG00000014964, ENSRNOG00000017869, ENSRNOG00000045617, ENSRNOG00000009824, ENSRNOG00000004441, ENSRNOG00000019057
CC	GO:0005737	cytoplasm	277	2.86195e-06	0.000305656	ENSRNOG00000002014, ENSRNOG00000017191, ENSRNOG00000058739, ENSRNOG00000003469, ENSRNOG00000054371, ENSRNOG00000019374, ENSRNOG00000012852, ENSRNOG00000000636, ENSRNOG00000008919, ENSRNOG00000059140, ENSRNOG00000016421, ENSRNOG00000020246, ENSRNOG00000013953, ENSRNOG00000013836, ENSRNOG00000009440, ENSRNOG00000052064, ENSRNOG00000009316, ENSRNOG00000052062, ENSRNOG00000012723, ENSRNOG00000016550,…
BP	GO:0001782	B cell homeostasis	10	3.56638e-06	0.000798869	ENSRNOG00000036829, ENSRNOG00000002304, ENSRNOG00000016846, ENSRNOG00000008180, ENSRNOG00000004409, ENSRNOG00000052348, ENSRNOG00000007664, ENSRNOG00000013321, ENSRNOG00000001839, ENSRNOG00000004131
CC	GO:0009986	cell surface	54	6.37476e-06	0.000567353	ENSRNOG00000030763, ENSRNOG00000003069, ENSRNOG00000003866, ENSRNOG00000018286, ENSRNOG00000002659, ENSRNOG00000034164, ENSRNOG00000018488, ENSRNOG00000017874, ENSRNOG00000014367, ENSRNOG00000013554, ENSRNOG00000013953, ENSRNOG00000024000, ENSRNOG00000003134, ENSRNOG00000054764, ENSRNOG00000022071, ENSRNOG00000001752, ENSRNOG00000006604, ENSRNOG00000009316, ENSRNOG00000010665, ENSRNOG00000056783,…
BP	GO:0002504	antigen processing and presentation of peptide or polysaccharide antigen via MHC class II	6	1.03058e-05	0.00216422	ENSRNOG00000032844, ENSRNOG00000000451, ENSRNOG00000033215, ENSRNOG00000000454, ENSRNOG00000032708, ENSRNOG00000030431
BP	GO:0018105	peptidyl-serine phosphorylation	22	1.22982e-05	0.0024307	ENSRNOG00000058938, ENSRNOG00000028616, ENSRNOG00000011589, ENSRNOG00000003469, ENSRNOG00000054371, ENSRNOG00000011059, ENSRNOG00000004726, ENSRNOG00000016550, ENSRNOG00000013397, ENSRNOG00000019057, ENSRNOG00000013177, ENSRNOG00000017882, ENSRNOG00000020505, ENSRNOG00000012160, ENSRNOG00000018985, ENSRNOG00000016434, ENSRNOG00000012061, ENSRNOG00000015603, ENSRNOG00000003491, ENSRNOG00000013529,…
BP	GO:0030890	positive regulation of B cell proliferation	11	1.71803e-05	0.00320698	ENSRNOG00000036829, ENSRNOG00000003069, ENSRNOG00000048161, ENSRNOG00000018735, ENSRNOG00000052407, ENSRNOG00000000655, ENSRNOG00000004409, ENSRNOG00000003064, ENSRNOG00000007664, ENSRNOG00000051499, ENSRNOG00000018488
BP	GO:0006955	immune response	28	1.8863e-05	0.00333577	ENSRNOG00000027990, ENSRNOG00000033215, ENSRNOG00000003866, ENSRNOG00000042193, ENSRNOG00000050430, ENSRNOG00000049829, ENSRNOG00000013280, ENSRNOG00000008394, ENSRNOG00000028015, ENSRNOG00000037908, ENSRNOG00000006620, ENSRNOG00000001752, ENSRNOG00000000321, ENSRNOG00000048161, ENSRNOG00000010665, ENSRNOG00000002968, ENSRNOG00000045829, ENSRNOG00000052348, ENSRNOG00000030431, ENSRNOG00000001839,…
BP	GO:0030217	T cell differentiation	11	2.48802e-05	0.00417987	ENSRNOG00000002540, ENSRNOG00000004444, ENSRNOG00000009705, ENSRNOG00000007049, ENSRNOG00000042229, ENSRNOG00000004623, ENSRNOG00000000655, ENSRNOG00000019430, ENSRNOG00000002969, ENSRNOG00000007200, ENSRNOG00000050430
MF	GO:0004888	transmembrane signaling receptor activity	17	2.67774e-05	0.00601772	ENSRNOG00000003136, ENSRNOG00000000055, ENSRNOG00000004405, ENSRNOG00000048161, ENSRNOG00000010266, ENSRNOG00000034230, ENSRNOG00000017485, ENSRNOG00000057335, ENSRNOG00000015773, ENSRNOG00000015994, ENSRNOG00000020125, ENSRNOG00000013588, ENSRNOG00000015945, ENSRNOG00000008431, ENSRNOG00000004441, ENSRNOG00000004221, ENSRNOG00000011917
BP	GO:0030889	negative regulation of B cell proliferation	8	2.74275e-05	0.0043884	ENSRNOG00000030246, ENSRNOG00000000321, ENSRNOG00000002304, ENSRNOG00000010798, ENSRNOG00000052407, ENSRNOG00000008180, ENSRNOG00000017020, ENSRNOG00000004131
MF	GO:0004698	calcium-dependent protein kinase C activity	7	2.99323e-05	0.00601772	ENSRNOG00000016434, ENSRNOG00000012061, ENSRNOG00000015603, ENSRNOG00000054371, ENSRNOG00000003491, ENSRNOG00000019057, ENSRNOG00000004131
BP	GO:0032729	positive regulation of interferon-gamma production	14	3.01408e-05	0.00460332	ENSRNOG00000054764, ENSRNOG00000000097, ENSRNOG00000048161, ENSRNOG00000005404, ENSRNOG00000004409, ENSRNOG00000005905, ENSRNOG00000002968, ENSRNOG00000038197, ENSRNOG00000038286, ENSRNOG00000007270, ENSRNOG00000017869, ENSRNOG00000007664, ENSRNOG00000008153, ENSRNOG00000024452
MF	GO:0004672	protein kinase activity	27	3.11151e-05	0.00601772	ENSRNOG00000005883, ENSRNOG00000025130, ENSRNOG00000019271, ENSRNOG00000058938, ENSRNOG00000011589, ENSRNOG00000054371, ENSRNOG00000019057, ENSRNOG00000018985, ENSRNOG00000027839, ENSRNOG00000004392, ENSRNOG00000004110, ENSRNOG00000004131, ENSRNOG00000008704, ENSRNOG00000011059, ENSRNOG00000012422, ENSRNOG00000016550, ENSRNOG00000013177, ENSRNOG00000016378, ENSRNOG00000012160, ENSRNOG00000009031,…
MF	GO:0004697	protein kinase C activity	6	3.42305e-05	0.00601772	ENSRNOG00000012061, ENSRNOG00000015603, ENSRNOG00000054371, ENSRNOG00000003491, ENSRNOG00000019057, ENSRNOG00000004131
BP	GO:0010572	positive regulation of platelet activation	6	3.53747e-05	0.00516778	ENSRNOG00000005214, ENSRNOG00000025959, ENSRNOG00000002794, ENSRNOG00000034025, ENSRNOG00000046981, ENSRNOG00000010015
BP	GO:0002639	positive regulation of immunoglobulin production	9	4.06135e-05	0.00568589	ENSRNOG00000009184, ENSRNOG00000020699, ENSRNOG00000048161, ENSRNOG00000022009, ENSRNOG00000052407, ENSRNOG00000000655, ENSRNOG00000004409, ENSRNOG00000002968, ENSRNOG00000015441
BP	GO:0032735	positive regulation of interleukin-12 production	10	6.44149e-05	0.00832439	ENSRNOG00000054764, ENSRNOG00000012160, ENSRNOG00000017869, ENSRNOG00000048161, ENSRNOG00000010665, ENSRNOG00000017703, ENSRNOG00000002968, ENSRNOG00000051986, ENSRNOG00000018488, ENSRNOG00000011680
BP	GO:0070527	platelet aggregation	10	6.44149e-05	0.00832439	ENSRNOG00000005214, ENSRNOG00000048472, ENSRNOG00000022071, ENSRNOG00000021161, ENSRNOG00000025959, ENSRNOG00000020246, ENSRNOG00000029682, ENSRNOG00000026039, ENSRNOG00000008187, ENSRNOG00000028377
BP	GO:0090330	regulation of platelet aggregation	5	7.58478e-05	0.00943884	ENSRNOG00000012160, ENSRNOG00000010798, ENSRNOG00000008180, ENSRNOG00000003491, ENSRNOG00000019057
BP	GO:0007166	cell surface receptor signaling pathway	19	9.14507e-05	0.0106897	ENSRNOG00000009705, ENSRNOG00000003136, ENSRNOG00000000055, ENSRNOG00000030246, ENSRNOG00000000321, ENSRNOG00000004317, ENSRNOG00000012535, ENSRNOG00000034230, ENSRNOG00000018895, ENSRNOG00000002969, ENSRNOG00000012045, ENSRNOG00000050430, ENSRNOG00000020945, ENSRNOG00000015994, ENSRNOG00000012160, ENSRNOG00000027839, ENSRNOG00000014963, ENSRNOG00000016846, ENSRNOG00000015945
BP	GO:0045059	positive thymic T cell selection	6	9.22623e-05	0.0106897	ENSRNOG00000015994, ENSRNOG00000018735, ENSRNOG00000006932, ENSRNOG00000015945, ENSRNOG00000000655, ENSRNOG00000002969
BP	GO:0051649	establishment of localization in cell	21	0.000120158	0.0134577	ENSRNOG00000003134, ENSRNOG00000004356, ENSRNOG00000004731, ENSRNOG00000019271, ENSRNOG00000008138, ENSRNOG00000001575, ENSRNOG00000007439, ENSRNOG00000032473, ENSRNOG00000001700, ENSRNOG00000019430, ENSRNOG00000059140, ENSRNOG00000012160, ENSRNOG00000023427, ENSRNOG00000058275, ENSRNOG00000020425, ENSRNOG00000015603, ENSRNOG00000017606, ENSRNOG00000025787, ENSRNOG00000007048, ENSRNOG00000008570,…
BP	GO:0006468	protein phosphorylation	41	0.000167112	0.0179227	ENSRNOG00000048230, ENSRNOG00000009705, ENSRNOG00000005883, ENSRNOG00000025130, ENSRNOG00000002079, ENSRNOG00000019271, ENSRNOG00000004437, ENSRNOG00000003469, ENSRNOG00000058938, ENSRNOG00000011589, ENSRNOG00000019374, ENSRNOG00000005509, ENSRNOG00000019057, ENSRNOG00000020505, ENSRNOG00000018985, ENSRNOG00000027839, ENSRNOG00000052407, ENSRNOG00000013953, ENSRNOG00000004392, ENSRNOG00000009385,…
BP	GO:0007169	transmembrane receptor protein tyrosine kinase signaling pathway	15	0.000170692	0.0179227	ENSRNOG00000054764, ENSRNOG00000009705, ENSRNOG00000002014, ENSRNOG00000025130, ENSRNOG00000010798, ENSRNOG00000043390, ENSRNOG00000012160, ENSRNOG00000014367, ENSRNOG00000027839, ENSRNOG00000013953, ENSRNOG00000008180, ENSRNOG00000014548, ENSRNOG00000013967, ENSRNOG00000028198, ENSRNOG00000021560
BP	GO:0042102	positive regulation of T cell proliferation	12	0.000204421	0.0208137	ENSRNOG00000036829, ENSRNOG00000049491, ENSRNOG00000007270, ENSRNOG00000000655, ENSRNOG00000019430, ENSRNOG00000004409, ENSRNOG00000002968, ENSRNOG00000017155, ENSRNOG00000007664, ENSRNOG00000028541, ENSRNOG00000019057, ENSRNOG00000024452
BP	GO:0042130	negative regulation of T cell proliferation	10	0.000234783	0.0226564	ENSRNOG00000000451, ENSRNOG00000014443, ENSRNOG00000030246, ENSRNOG00000033215, ENSRNOG00000018804, ENSRNOG00000020148, ENSRNOG00000020699, ENSRNOG00000032708, ENSRNOG00000026039, ENSRNOG00000016041
BP	GO:0050855	regulation of B cell receptor signaling pathway	4	0.000236004	0.0226564	ENSRNOG00000010798, ENSRNOG00000008180, ENSRNOG00000018311, ENSRNOG00000022110
BP	GO:0046777	protein autophosphorylation	20	0.000246127	0.0229719	ENSRNOG00000054764, ENSRNOG00000008704, ENSRNOG00000009705, ENSRNOG00000006604, ENSRNOG00000011589, ENSRNOG00000054371, ENSRNOG00000000655, ENSRNOG00000019374, ENSRNOG00000012422, ENSRNOG00000004726, ENSRNOG00000013177, ENSRNOG00000020505, ENSRNOG00000012160, ENSRNOG00000016434, ENSRNOG00000013953, ENSRNOG00000008180, ENSRNOG00000052407, ENSRNOG00000004392, ENSRNOG00000003491, ENSRNOG00000013529
MF	GO:0042609	CD4 receptor binding	5	0.000249688	0.0365793	ENSRNOG00000009705, ENSRNOG00000033215, ENSRNOG00000018735, ENSRNOG00000024000, ENSRNOG00000011680
CC	GO:0045121	membrane raft	27	0.000260671	0.0198855	ENSRNOG00000009705, ENSRNOG00000030763, ENSRNOG00000000655, ENSRNOG00000019374, ENSRNOG00000013000, ENSRNOG00000018985, ENSRNOG00000027839, ENSRNOG00000020125, ENSRNOG00000014963, ENSRNOG00000052407, ENSRNOG00000047204, ENSRNOG00000006410, ENSRNOG00000025895, ENSRNOG00000002188, ENSRNOG00000005731, ENSRNOG00000003476, ENSRNOG00000000321, ENSRNOG00000006604, ENSRNOG00000017020, ENSRNOG00000011133,…
BP	GO:0035855	megakaryocyte development	7	0.000267271	0.0242711	ENSRNOG00000025959, ENSRNOG00000008904, ENSRNOG00000026936, ENSRNOG00000004606, ENSRNOG00000046981, ENSRNOG00000010015, ENSRNOG00000028198
BP	GO:0019882	antigen processing and presentation	9	0.00032899	0.0285898	ENSRNOG00000054764, ENSRNOG00000000451, ENSRNOG00000049491, ENSRNOG00000018735, ENSRNOG00000017703, ENSRNOG00000032708, ENSRNOG00000029662, ENSRNOG00000030431, ENSRNOG00000026762
BP	GO:0016064	immunoglobulin mediated immune response	7	0.00034005	0.0285898	ENSRNOG00000032844, ENSRNOG00000015773, ENSRNOG00000018735, ENSRNOG00000017020, ENSRNOG00000018311, ENSRNOG00000034164, ENSRNOG00000015441
BP	GO:0043410	positive regulation of MAPK cascade	20	0.000340355	0.0285898	ENSRNOG00000032247, ENSRNOG00000017191, ENSRNOG00000033215, ENSRNOG00000004437, ENSRNOG00000001776, ENSRNOG00000048161, ENSRNOG00000034025, ENSRNOG00000000655, ENSRNOG00000014290, ENSRNOG00000051986, ENSRNOG00000005947, ENSRNOG00000012002, ENSRNOG00000013177, ENSRNOG00000020505, ENSRNOG00000012160, ENSRNOG00000018735, ENSRNOG00000048706, ENSRNOG00000013953, ENSRNOG00000015603, ENSRNOG00000022210
BP	GO:0051209	release of sequestered calcium ion into cytosol	9	0.00038469	0.0311204	ENSRNOG00000009705, ENSRNOG00000025959, ENSRNOG00000006620, ENSRNOG00000000655, ENSRNOG00000046981, ENSRNOG00000010015, ENSRNOG00000051986, ENSRNOG00000001804, ENSRNOG00000017671
BP	GO:0051279	regulation of release of sequestered calcium ion into cytosol	6	0.000389005	0.0311204	ENSRNOG00000027839, ENSRNOG00000008180, ENSRNOG00000015603, ENSRNOG00000019430, ENSRNOG00000011076, ENSRNOG00000008187
CC	GO:0031234	extrinsic component of cytoplasmic side of plasma membrane	11	0.000391064	0.0261035	ENSRNOG00000049033, ENSRNOG00000009705, ENSRNOG00000012160, ENSRNOG00000027839, ENSRNOG00000008865, ENSRNOG00000010798, ENSRNOG00000008180, ENSRNOG00000021106, ENSRNOG00000056697, ENSRNOG00000012002, ENSRNOG00000011550
BP	GO:0043406	positive regulation of MAP kinase activity	12	0.000398948	0.0311736	ENSRNOG00000014443, ENSRNOG00000005883, ENSRNOG00000000321, ENSRNOG00000004437, ENSRNOG00000005404, ENSRNOG00000000655, ENSRNOG00000019374, ENSRNOG00000045829, ENSRNOG00000012002, ENSRNOG00000009385, ENSRNOG00000018488, ENSRNOG00000013177
BP	GO:0045588	positive regulation of gamma-delta T cell differentiation	5	0.000413848	0.031603	ENSRNOG00000009705, ENSRNOG00000036829, ENSRNOG00000012160, ENSRNOG00000000655, ENSRNOG00000010121
BP	GO:0048872	homeostasis of number of cells	8	0.000522504	0.03882	ENSRNOG00000055858, ENSRNOG00000016846, ENSRNOG00000010665, ENSRNOG00000052348, ENSRNOG00000021261, ENSRNOG00000001839, ENSRNOG00000024452, ENSRNOG00000028377
BP	GO:0050860	negative regulation of T cell receptor signaling pathway	7	0.000531464	0.03882	ENSRNOG00000000097, ENSRNOG00000006604, ENSRNOG00000017737, ENSRNOG00000020337, ENSRNOG00000034025, ENSRNOG00000011762, ENSRNOG00000028541
BP	GO:0007596	blood coagulation	11	0.000555339	0.0392702	ENSRNOG00000048472, ENSRNOG00000057855, ENSRNOG00000025959, ENSRNOG00000019689, ENSRNOG00000026936, ENSRNOG00000016659, ENSRNOG00000034025, ENSRNOG00000046981, ENSRNOG00000010015, ENSRNOG00000024986, ENSRNOG00000026039
BP	GO:0030888	regulation of B cell proliferation	4	0.00057269	0.0392702	ENSRNOG00000022009, ENSRNOG00000037339, ENSRNOG00000024000, ENSRNOG00000007200
BP	GO:0002768	immune response-regulating cell surface receptor signaling pathway	4	0.00057269	0.0392702	ENSRNOG00000030246, ENSRNOG00000008180, ENSRNOG00000018488, ENSRNOG00000050430
BP	GO:0032753	positive regulation of interleukin-4 production	7	0.000654105	0.0439559	ENSRNOG00000012160, ENSRNOG00000061070, ENSRNOG00000004409, ENSRNOG00000002968, ENSRNOG00000008707, ENSRNOG00000008394, ENSRNOG00000019057
MF	GO:1990782	protein tyrosine kinase binding	9	0.000754871	0.0947902	ENSRNOG00000032247, ENSRNOG00000014548, ENSRNOG00000019374, ENSRNOG00000047204, ENSRNOG00000015380, ENSRNOG00000051986, ENSRNOG00000013967, ENSRNOG00000028198, ENSRNOG00000021560
CC	GO:0005856	cytoskeleton	31	0.00100907	0.0589823	ENSRNOG00000012932, ENSRNOG00000003469, ENSRNOG00000012852, ENSRNOG00000016166, ENSRNOG00000051619, ENSRNOG00000027839, ENSRNOG00000018804, ENSRNOG00000016724, ENSRNOG00000029131, ENSRNOG00000006410, ENSRNOG00000008471, ENSRNOG00000002540, ENSRNOG00000056944, ENSRNOG00000001796, ENSRNOG00000030118, ENSRNOG00000012820, ENSRNOG00000012422, ENSRNOG00000017020, ENSRNOG00000016550, ENSRNOG00000000528,…
CC	GO:0016020	membrane	89	0.00110454	0.0589823	ENSRNOG00000013309, ENSRNOG00000025130, ENSRNOG00000003069, ENSRNOG00000002730, ENSRNOG00000003469, ENSRNOG00000031536, ENSRNOG00000054371, ENSRNOG00000012852, ENSRNOG00000018286, ENSRNOG00000029938, ENSRNOG00000015051, ENSRNOG00000051986, ENSRNOG00000019057, ENSRNOG00000013220, ENSRNOG00000015773, ENSRNOG00000017635, ENSRNOG00000049629, ENSRNOG00000024127, ENSRNOG00000004275, ENSRNOG00000027037,…
BP	GO:0043382	positive regulation of memory T cell differentiation	4	0.00111183	0.0732497	ENSRNOG00000032844, ENSRNOG00000033215, ENSRNOG00000028616, ENSRNOG00000002968
BP	GO:0007010	cytoskeleton organization	13	0.00130733	0.0844737	ENSRNOG00000006604, ENSRNOG00000046151, ENSRNOG00000006932, ENSRNOG00000003469, ENSRNOG00000012820, ENSRNOG00000005509, ENSRNOG00000012422, ENSRNOG00000037079, ENSRNOG00000000528, ENSRNOG00000011076, ENSRNOG00000046333, ENSRNOG00000026039, ENSRNOG00000009760
BP	GO:0018108	peptidyl-tyrosine phosphorylation	15	0.00155453	0.0985515	ENSRNOG00000054764, ENSRNOG00000009705, ENSRNOG00000025130, ENSRNOG00000000321, ENSRNOG00000010798, ENSRNOG00000000655, ENSRNOG00000019374, ENSRNOG00000012160, ENSRNOG00000014367, ENSRNOG00000027839, ENSRNOG00000007270, ENSRNOG00000013953, ENSRNOG00000008180, ENSRNOG00000052407, ENSRNOG00000004392
BP	GO:0042832	defense response to protozoan	7	0.00162685	0.101226	ENSRNOG00000028015, ENSRNOG00000061070, ENSRNOG00000020699, ENSRNOG00000017869, ENSRNOG00000026039, ENSRNOG00000018488, ENSRNOG00000015441
CC	GO:0005911	cell-cell junction	20	0.00165332	0.0778095	ENSRNOG00000009705, ENSRNOG00000003866, ENSRNOG00000054371, ENSRNOG00000034025, ENSRNOG00000012820, ENSRNOG00000019374, ENSRNOG00000019430, ENSRNOG00000015380, ENSRNOG00000037765, ENSRNOG00000011133, ENSRNOG00000012002, ENSRNOG00000033087, ENSRNOG00000018760, ENSRNOG00000050430, ENSRNOG00000056258, ENSRNOG00000017775, ENSRNOG00000017874, ENSRNOG00000016724, ENSRNOG00000007048, ENSRNOG00000024452
MF	GO:0004674	protein serine/threonine kinase activity	27	0.00167959	0.149096	ENSRNOG00000048230, ENSRNOG00000005883, ENSRNOG00000002079, ENSRNOG00000004437, ENSRNOG00000003469, ENSRNOG00000011589, ENSRNOG00000054371, ENSRNOG00000005509, ENSRNOG00000019057, ENSRNOG00000020505, ENSRNOG00000018985, ENSRNOG00000004131, ENSRNOG00000008704, ENSRNOG00000054548, ENSRNOG00000011059, ENSRNOG00000012422, ENSRNOG00000004726, ENSRNOG00000016550, ENSRNOG00000013177, ENSRNOG00000008061,…
BP	GO:0006954	inflammatory response	26	0.00168181	0.102743	ENSRNOG00000031930, ENSRNOG00000002794, ENSRNOG00000002659, ENSRNOG00000034164, ENSRNOG00000018488, ENSRNOG00000002419, ENSRNOG00000019057, ENSRNOG00000016945, ENSRNOG00000020585, ENSRNOG00000028015, ENSRNOG00000002188, ENSRNOG00000007415, ENSRNOG00000001752, ENSRNOG00000048161, ENSRNOG00000010665, ENSRNOG00000002968, ENSRNOG00000045829, ENSRNOG00000004726, ENSRNOG00000055597, ENSRNOG00000002829,…
MF	GO:0001784	phosphotyrosine binding	8	0.00168641	0.149096	ENSRNOG00000009705, ENSRNOG00000002014, ENSRNOG00000012160, ENSRNOG00000002599, ENSRNOG00000051986, ENSRNOG00000017155, ENSRNOG00000007422, ENSRNOG00000050430
MF	GO:0033691	sialic acid binding	5	0.0016962	0.149096	ENSRNOG00000002794, ENSRNOG00000021499, ENSRNOG00000037339, ENSRNOG00000024000, ENSRNOG00000009342
BP	GO:0030098	lymphocyte differentiation	5	0.00173907	0.104344	ENSRNOG00000004444, ENSRNOG00000054764, ENSRNOG00000003954, ENSRNOG00000014647, ENSRNOG00000051499
CC	GO:0005887	integral component of plasma membrane	69	0.00174853	0.0778095	ENSRNOG00000024120, ENSRNOG00000037839, ENSRNOG00000025130, ENSRNOG00000030246, ENSRNOG00000032989, ENSRNOG00000019490, ENSRNOG00000031536, ENSRNOG00000018286, ENSRNOG00000017874, ENSRNOG00000014367, ENSRNOG00000014963, ENSRNOG00000013953, ENSRNOG00000049629, ENSRNOG00000008431, ENSRNOG00000047204, ENSRNOG00000024000, ENSRNOG00000003134, ENSRNOG00000054764, ENSRNOG00000025220, ENSRNOG00000003136,…
CC	GO:0030425	dendrite	39	0.00204858	0.0841492	ENSRNOG00000006831, ENSRNOG00000005307, ENSRNOG00000018260, ENSRNOG00000005700, ENSRNOG00000003469, ENSRNOG00000001742, ENSRNOG00000054371, ENSRNOG00000012852, ENSRNOG00000012573, ENSRNOG00000027839, ENSRNOG00000017635, ENSRNOG00000020644, ENSRNOG00000013953, ENSRNOG00000008431, ENSRNOG00000020388, ENSRNOG00000049768, ENSRNOG00000006410, ENSRNOG00000008471, ENSRNOG00000007400, ENSRNOG00000005662,…
BP	GO:0007229	integrin-mediated signaling pathway	12	0.00207643	0.1224	ENSRNOG00000005214, ENSRNOG00000022071, ENSRNOG00000021161, ENSRNOG00000012160, ENSRNOG00000027839, ENSRNOG00000006604, ENSRNOG00000003357, ENSRNOG00000026936, ENSRNOG00000037765, ENSRNOG00000026039, ENSRNOG00000001518, ENSRNOG00000050430
CC	GO:0043005	neuron projection	37	0.00223522	0.0852576	ENSRNOG00000006831, ENSRNOG00000002079, ENSRNOG00000001424, ENSRNOG00000003469, ENSRNOG00000011589, ENSRNOG00000054371, ENSRNOG00000018286, ENSRNOG00000001700, ENSRNOG00000008052, ENSRNOG00000014367, ENSRNOG00000023258, ENSRNOG00000008431, ENSRNOG00000015418, ENSRNOG00000008890, ENSRNOG00000003880, ENSRNOG00000021098, ENSRNOG00000007415, ENSRNOG00000003476, ENSRNOG00000005697, ENSRNOG00000003512,…
BP	GO:0001666	response to hypoxia	23	0.00242741	0.136283	ENSRNOG00000000053, ENSRNOG00000003069, ENSRNOG00000030763, ENSRNOG00000003476, ENSRNOG00000055858, ENSRNOG00000008941, ENSRNOG00000000321, ENSRNOG00000003866, ENSRNOG00000011589, ENSRNOG00000001804, ENSRNOG00000019057, ENSRNOG00000016695, ENSRNOG00000012660, ENSRNOG00000016166, ENSRNOG00000014443, ENSRNOG00000012061, ENSRNOG00000027839, ENSRNOG00000018958, ENSRNOG00000014964, ENSRNOG00000014723,…
BP	GO:0043547	positive regulation of GTPase activity	17	0.00243074	0.136283	ENSRNOG00000056826, ENSRNOG00000006604, ENSRNOG00000005404, ENSRNOG00000012852, ENSRNOG00000004736, ENSRNOG00000037765, ENSRNOG00000001518, ENSRNOG00000018488, ENSRNOG00000013321, ENSRNOG00000050430, ENSRNOG00000015894, ENSRNOG00000016278, ENSRNOG00000016910, ENSRNOG00000013953, ENSRNOG00000023951, ENSRNOG00000042592, ENSRNOG00000021098
BP	GO:0007155	cell adhesion	27	0.00243362	0.136283	ENSRNOG00000030763, ENSRNOG00000002794, ENSRNOG00000007922, ENSRNOG00000037339, ENSRNOG00000025959, ENSRNOG00000013850, ENSRNOG00000027839, ENSRNOG00000014963, ENSRNOG00000018804, ENSRNOG00000014548, ENSRNOG00000021499, ENSRNOG00000004275, ENSRNOG00000005652, ENSRNOG00000000321, ENSRNOG00000009316, ENSRNOG00000032517, ENSRNOG00000058003, ENSRNOG00000015380, ENSRNOG00000010121, ENSRNOG00000033087,…
MF	GO:0003700	transcription factor activity, sequence-specific DNA binding	32	0.00244493	0.195372	ENSRNOG00000005984, ENSRNOG00000006831, ENSRNOG00000007049, ENSRNOG00000034007, ENSRNOG00000028845, ENSRNOG00000031778, ENSRNOG00000009824, ENSRNOG00000017030, ENSRNOG00000033433, ENSRNOG00000011762, ENSRNOG00000024729, ENSRNOG00000009184, ENSRNOG00000018803, ENSRNOG00000061070, ENSRNOG00000006170, ENSRNOG00000014666, ENSRNOG00000021833, ENSRNOG00000023258, ENSRNOG00000014647, ENSRNOG00000007400,…
BP	GO:0016477	cell migration	23	0.00251736	0.138661	ENSRNOG00000036829, ENSRNOG00000000321, ENSRNOG00000003866, ENSRNOG00000003207, ENSRNOG00000019430, ENSRNOG00000015380, ENSRNOG00000029938, ENSRNOG00000045829, ENSRNOG00000017155, ENSRNOG00000012002, ENSRNOG00000016695, ENSRNOG00000050430, ENSRNOG00000013694, ENSRNOG00000014963, ENSRNOG00000016623, ENSRNOG00000016846, ENSRNOG00000048706, ENSRNOG00000014548, ENSRNOG00000014317, ENSRNOG00000007422,…
MF	GO:0051019	mitogen-activated protein kinase binding	7	0.00288893	0.211614	ENSRNOG00000004003, ENSRNOG00000013862, ENSRNOG00000034025, ENSRNOG00000014061, ENSRNOG00000004726, ENSRNOG00000012002, ENSRNOG00000013177
BP	GO:0045184	establishment of protein localization	8	0.00289886	0.157099	ENSRNOG00000004444, ENSRNOG00000016377, ENSRNOG00000018804, ENSRNOG00000001700, ENSRNOG00000037765, ENSRNOG00000003491, ENSRNOG00000014816, ENSRNOG00000024452
BP	GO:0046834	lipid phosphorylation	5	0.00296964	0.158381	ENSRNOG00000001796, ENSRNOG00000017737, ENSRNOG00000023238, ENSRNOG00000029938, ENSRNOG00000017022
BP	GO:0038083	peptidyl-tyrosine autophosphorylation	6	0.00308331	0.161874	ENSRNOG00000009705, ENSRNOG00000025130, ENSRNOG00000027839, ENSRNOG00000013953, ENSRNOG00000052407, ENSRNOG00000004392
CC	GO:0009898	cytoplasmic side of plasma membrane	9	0.00315763	0.112412	ENSRNOG00000030118, ENSRNOG00000043390, ENSRNOG00000052219, ENSRNOG00000000655, ENSRNOG00000015380, ENSRNOG00000020410, ENSRNOG00000006410, ENSRNOG00000009760, ENSRNOG00000001173
BP	GO:0007193	adenylate cyclase-inhibiting G-protein coupled receptor signaling pathway	8	0.00325857	0.168443	ENSRNOG00000021468, ENSRNOG00000019184, ENSRNOG00000019549, ENSRNOG00000001313, ENSRNOG00000008431, ENSRNOG00000006410, ENSRNOG00000005662, ENSRNOG00000009760
MF	GO:0004896	cytokine receptor activity	8	0.00351599	0.237735	ENSRNOG00000054764, ENSRNOG00000015773, ENSRNOG00000007270, ENSRNOG00000003954, ENSRNOG00000018735, ENSRNOG00000005954, ENSRNOG00000028377, ENSRNOG00000015441
BP	GO:0007264	small GTPase mediated signal transduction	11	0.00357864	0.182185	ENSRNOG00000015894, ENSRNOG00000028090, ENSRNOG00000016910, ENSRNOG00000006932, ENSRNOG00000005404, ENSRNOG00000004736, ENSRNOG00000007048, ENSRNOG00000007422, ENSRNOG00000013321, ENSRNOG00000050430, ENSRNOG00000021098
MF	GO:0019901	protein kinase binding	36	0.00380285	0.238764	ENSRNOG00000009705, ENSRNOG00000002014, ENSRNOG00000007049, ENSRNOG00000017191, ENSRNOG00000004437, ENSRNOG00000011523, ENSRNOG00000034025, ENSRNOG00000000655, ENSRNOG00000051986, ENSRNOG00000006410, ENSRNOG00000008570, ENSRNOG00000003893, ENSRNOG00000002540, ENSRNOG00000049033, ENSRNOG00000006622, ENSRNOG00000000321, ENSRNOG00000006604, ENSRNOG00000008922, ENSRNOG00000030118, ENSRNOG00000015380,…
BP	GO:0042127	regulation of cell proliferation	18	0.00383674	0.19241	ENSRNOG00000028015, ENSRNOG00000007415, ENSRNOG00000031930, ENSRNOG00000025130, ENSRNOG00000034007, ENSRNOG00000012439, ENSRNOG00000001514, ENSRNOG00000015380, ENSRNOG00000045918, ENSRNOG00000013397, ENSRNOG00000015441, ENSRNOG00000009031, ENSRNOG00000031081, ENSRNOG00000016945, ENSRNOG00000022009, ENSRNOG00000009465, ENSRNOG00000005053, ENSRNOG00000004221
CC	GO:0014069	postsynaptic density	26	0.00400701	0.133734	ENSRNOG00000007049, ENSRNOG00000002079, ENSRNOG00000031536, ENSRNOG00000054371, ENSRNOG00000005905, ENSRNOG00000017155, ENSRNOG00000012573, ENSRNOG00000027839, ENSRNOG00000017737, ENSRNOG00000016724, ENSRNOG00000046333, ENSRNOG00000006410, ENSRNOG00000007047, ENSRNOG00000009760, ENSRNOG00000005434, ENSRNOG00000001575, ENSRNOG00000012820, ENSRNOG00000014290, ENSRNOG00000011550, ENSRNOG00000011076,…
BP	GO:0008361	regulation of cell size	6	0.00431744	0.210241	ENSRNOG00000011857, ENSRNOG00000030118, ENSRNOG00000052348, ENSRNOG00000007422, ENSRNOG00000001839, ENSRNOG00000050430
BP	GO:0045921	positive regulation of exocytosis	6	0.00431744	0.210241	ENSRNOG00000007439, ENSRNOG00000007636, ENSRNOG00000003526, ENSRNOG00000003491, ENSRNOG00000008570, ENSRNOG00000012176
MF	GO:0005096	GTPase activator activity	19	0.00432655	0.246875	ENSRNOG00000049033, ENSRNOG00000001374, ENSRNOG00000056944, ENSRNOG00000036829, ENSRNOG00000056826, ENSRNOG00000006604, ENSRNOG00000006932, ENSRNOG00000017065, ENSRNOG00000031168, ENSRNOG00000012002, ENSRNOG00000003959, ENSRNOG00000012045, ENSRNOG00000017671, ENSRNOG00000013220, ENSRNOG00000015359, ENSRNOG00000002180, ENSRNOG00000023951, ENSRNOG00000042592, ENSRNOG00000013836
BP	GO:0045766	positive regulation of angiogenesis	16	0.00438477	0.210469	ENSRNOG00000002188, ENSRNOG00000031930, ENSRNOG00000008941, ENSRNOG00000015380, ENSRNOG00000045829, ENSRNOG00000018488, ENSRNOG00000016434, ENSRNOG00000012061, ENSRNOG00000027839, ENSRNOG00000016846, ENSRNOG00000013953, ENSRNOG00000020425, ENSRNOG00000009465, ENSRNOG00000003491, ENSRNOG00000020585, ENSRNOG00000004284
BP	GO:0050852	T cell receptor signaling pathway	11	0.0044992	0.211053	ENSRNOG00000007129, ENSRNOG00000016434, ENSRNOG00000033215, ENSRNOG00000006604, ENSRNOG00000017181, ENSRNOG00000000655, ENSRNOG00000005905, ENSRNOG00000032708, ENSRNOG00000051986, ENSRNOG00000028541, ENSRNOG00000024452
BP	GO:0002215	defense response to nematode	3	0.00452256	0.211053	ENSRNOG00000002968, ENSRNOG00000008707, ENSRNOG00000008394
BP	GO:0000165	MAPK cascade	13	0.00465642	0.214323	ENSRNOG00000008704, ENSRNOG00000002079, ENSRNOG00000032247, ENSRNOG00000004437, ENSRNOG00000000655, ENSRNOG00000012422, ENSRNOG00000002969, ENSRNOG00000013177, ENSRNOG00000016378, ENSRNOG00000027839, ENSRNOG00000048706, ENSRNOG00000015603, ENSRNOG00000023258
MF	GO:0005178	integrin binding	14	0.00482764	0.246875	ENSRNOG00000048472, ENSRNOG00000022071, ENSRNOG00000021161, ENSRNOG00000006604, ENSRNOG00000003357, ENSRNOG00000045829, ENSRNOG00000001518, ENSRNOG00000038197, ENSRNOG00000012160, ENSRNOG00000019689, ENSRNOG00000008180, ENSRNOG00000009465, ENSRNOG00000003491, ENSRNOG00000004275
CC	GO:0098978	glutamatergic synapse	34	0.00489971	0.153909	ENSRNOG00000009705, ENSRNOG00000002079, ENSRNOG00000034007, ENSRNOG00000005700, ENSRNOG00000001006, ENSRNOG00000058938, ENSRNOG00000019430, ENSRNOG00000012852, ENSRNOG00000012573, ENSRNOG00000013694, ENSRNOG00000027839, ENSRNOG00000013654, ENSRNOG00000017737, ENSRNOG00000008431, ENSRNOG00000006410, ENSRNOG00000008570, ENSRNOG00000005662, ENSRNOG00000007047, ENSRNOG00000005434, ENSRNOG00000001575,…
MF	GO:0035591	signaling adaptor activity	6	0.00490797	0.246875	ENSRNOG00000002014, ENSRNOG00000032247, ENSRNOG00000020337, ENSRNOG00000013967, ENSRNOG00000017155, ENSRNOG00000007047
BP	GO:0006816	calcium ion transport	11	0.00520986	0.235135	ENSRNOG00000012061, ENSRNOG00000055858, ENSRNOG00000008514, ENSRNOG00000011589, ENSRNOG00000020425, ENSRNOG00000014714, ENSRNOG00000019430, ENSRNOG00000011133, ENSRNOG00000001804, ENSRNOG00000033087, ENSRNOG00000018378
MF	GO:0005509	calcium ion binding	42	0.00525087	0.246875	ENSRNOG00000000053, ENSRNOG00000048472, ENSRNOG00000006950, ENSRNOG00000002794, ENSRNOG00000008514, ENSRNOG00000005404, ENSRNOG00000001128, ENSRNOG00000001804, ENSRNOG00000054277, ENSRNOG00000055365, ENSRNOG00000037079, ENSRNOG00000014021, ENSRNOG00000056258, ENSRNOG00000015410, ENSRNOG00000020246, ENSRNOG00000016945, ENSRNOG00000020425, ENSRNOG00000017912, ENSRNOG00000024986, ENSRNOG00000004275,…
BP	GO:0006919	activation of cysteine-type endopeptidase activity involved in apoptotic process	10	0.0052871	0.235135	ENSRNOG00000009705, ENSRNOG00000012439, ENSRNOG00000017912, ENSRNOG00000017606, ENSRNOG00000001091, ENSRNOG00000005053, ENSRNOG00000049179, ENSRNOG00000014816, ENSRNOG00000008022, ENSRNOG00000023143
BP	GO:0032755	positive regulation of interleukin-6 production	12	0.00531853	0.235135	ENSRNOG00000012160, ENSRNOG00000018985, ENSRNOG00000048161, ENSRNOG00000052062, ENSRNOG00000018735, ENSRNOG00000052407, ENSRNOG00000017703, ENSRNOG00000011500, ENSRNOG00000055650, ENSRNOG00000002968, ENSRNOG00000051986, ENSRNOG00000011680
MF	GO:0004714	transmembrane receptor protein tyrosine kinase activity	11	0.00533631	0.246875	ENSRNOG00000054764, ENSRNOG00000009705, ENSRNOG00000012160, ENSRNOG00000014367, ENSRNOG00000025130, ENSRNOG00000027839, ENSRNOG00000013953, ENSRNOG00000010798, ENSRNOG00000052407, ENSRNOG00000008180, ENSRNOG00000019374
BP	GO:0050776	regulation of immune response	8	0.00559139	0.243299	ENSRNOG00000007129, ENSRNOG00000000055, ENSRNOG00000012160, ENSRNOG00000037339, ENSRNOG00000017020, ENSRNOG00000007664, ENSRNOG00000018488, ENSRNOG00000024000
BP	GO:0031175	neuron projection development	16	0.00566328	0.243299	ENSRNOG00000006557, ENSRNOG00000005652, ENSRNOG00000000321, ENSRNOG00000009218, ENSRNOG00000002248, ENSRNOG00000010798, ENSRNOG00000012684, ENSRNOG00000002419, ENSRNOG00000046449, ENSRNOG00000018803, ENSRNOG00000027839, ENSRNOG00000016810, ENSRNOG00000013953, ENSRNOG00000008180, ENSRNOG00000014758, ENSRNOG00000012819
BP	GO:0030097	hemopoiesis	10	0.00572043	0.243299	ENSRNOG00000004444, ENSRNOG00000054764, ENSRNOG00000008180, ENSRNOG00000007044, ENSRNOG00000004606, ENSRNOG00000014879, ENSRNOG00000052348, ENSRNOG00000000636, ENSRNOG00000028198, ENSRNOG00000028377
CC	GO:0031091	platelet alpha granule	5	0.00573624	0.166058	ENSRNOG00000028015, ENSRNOG00000057855, ENSRNOG00000024986, ENSRNOG00000045829, ENSRNOG00000002829
CC	GO:0044224	juxtaparanode region of axon	4	0.00590842	0.166058	ENSRNOG00000022635, ENSRNOG00000016724, ENSRNOG00000056697, ENSRNOG00000011550
MF	GO:0003823	antigen binding	8	0.00595649	0.260235	ENSRNOG00000025990, ENSRNOG00000058590, ENSRNOG00000050000, ENSRNOG00000009705, ENSRNOG00000049870, ENSRNOG00000034190, ENSRNOG00000018488, ENSRNOG00000009342
BP	GO:1902476	chloride transmembrane transport	11	0.00600555	0.252233	ENSRNOG00000004731, ENSRNOG00000057072, ENSRNOG00000023427, ENSRNOG00000003512, ENSRNOG00000013588, ENSRNOG00000032417, ENSRNOG00000001742, ENSRNOG00000005196, ENSRNOG00000029682, ENSRNOG00000014816, ENSRNOG00000003915
MF	GO:0004715	non-membrane spanning protein tyrosine kinase activity	7	0.00621721	0.260235	ENSRNOG00000009705, ENSRNOG00000012160, ENSRNOG00000027839, ENSRNOG00000010798, ENSRNOG00000052407, ENSRNOG00000008180, ENSRNOG00000019374
CC	GO:0070161	anchoring junction	28	0.00648175	0.169128	ENSRNOG00000031930, ENSRNOG00000030763, ENSRNOG00000005307, ENSRNOG00000031536, ENSRNOG00000003769, ENSRNOG00000018286, ENSRNOG00000001700, ENSRNOG00000012573, ENSRNOG00000014264, ENSRNOG00000018985, ENSRNOG00000008431, ENSRNOG00000006410, ENSRNOG00000008570, ENSRNOG00000007047, ENSRNOG00000009760, ENSRNOG00000021098, ENSRNOG00000003512, ENSRNOG00000001575, ENSRNOG00000032417, ENSRNOG00000010861,…
MF	GO:0005524	ATP binding	75	0.00656359	0.260647	ENSRNOG00000006732, ENSRNOG00000005883, ENSRNOG00000025130, ENSRNOG00000009722, ENSRNOG00000004437, ENSRNOG00000058938, ENSRNOG00000003469, ENSRNOG00000010798, ENSRNOG00000019374, ENSRNOG00000054371, ENSRNOG00000029938, ENSRNOG00000002659, ENSRNOG00000010431, ENSRNOG00000019057, ENSRNOG00000059140, ENSRNOG00000014367, ENSRNOG00000032183, ENSRNOG00000027839, ENSRNOG00000023238, ENSRNOG00000017912,…
BP	GO:0032715	negative regulation of interleukin-6 production	9	0.00663843	0.275372	ENSRNOG00000054764, ENSRNOG00000036829, ENSRNOG00000032247, ENSRNOG00000000321, ENSRNOG00000048161, ENSRNOG00000019374, ENSRNOG00000018570, ENSRNOG00000017020, ENSRNOG00000024210
CC	GO:0005938	cell cortex	15	0.00665111	0.169128	ENSRNOG00000002540, ENSRNOG00000031930, ENSRNOG00000004772, ENSRNOG00000002248, ENSRNOG00000012820, ENSRNOG00000001804, ENSRNOG00000018760, ENSRNOG00000027839, ENSRNOG00000020246, ENSRNOG00000061764, ENSRNOG00000001091, ENSRNOG00000026764, ENSRNOG00000007047, ENSRNOG00000005662
MF	GO:0005547	phosphatidylinositol-3,4,5-trisphosphate binding	7	0.00696631	0.260647	ENSRNOG00000059140, ENSRNOG00000049033, ENSRNOG00000056826, ENSRNOG00000004623, ENSRNOG00000052407, ENSRNOG00000001091, ENSRNOG00000012002
MF	GO:0044325	ion channel binding	14	0.00711663	0.260647	ENSRNOG00000004356, ENSRNOG00000008865, ENSRNOG00000011589, ENSRNOG00000032473, ENSRNOG00000005905, ENSRNOG00000056697, ENSRNOG00000001804, ENSRNOG00000011550, ENSRNOG00000011076, ENSRNOG00000008180, ENSRNOG00000017912, ENSRNOG00000028991, ENSRNOG00000001173, ENSRNOG00000022044
BP	GO:0032733	positive regulation of interleukin-10 production	7	0.00719496	0.294818	ENSRNOG00000012160, ENSRNOG00000061070, ENSRNOG00000048161, ENSRNOG00000004409, ENSRNOG00000002968, ENSRNOG00000051986, ENSRNOG00000056574
BP	GO:0032760	positive regulation of tumor necrosis factor production	12	0.00731198	0.296003	ENSRNOG00000028015, ENSRNOG00000012160, ENSRNOG00000019549, ENSRNOG00000048161, ENSRNOG00000052407, ENSRNOG00000005404, ENSRNOG00000000655, ENSRNOG00000034025, ENSRNOG00000004409, ENSRNOG00000051986, ENSRNOG00000004726, ENSRNOG00000045829
MF	GO:0042608	T cell receptor binding	4	0.00776709	0.273091	ENSRNOG00000032844, ENSRNOG00000009705, ENSRNOG00000033215, ENSRNOG00000006932
BP	GO:0007159	leukocyte cell-cell adhesion	6	0.00777382	0.310953	ENSRNOG00000021161, ENSRNOG00000012160, ENSRNOG00000002794, ENSRNOG00000000321, ENSRNOG00000030118, ENSRNOG00000000655
BP	GO:0046641	positive regulation of alpha-beta T cell proliferation	4	0.00791269	0.312784	ENSRNOG00000012160, ENSRNOG00000000321, ENSRNOG00000000655, ENSRNOG00000002968
BP	GO:0043408	regulation of MAPK cascade	7	0.00803205	0.31381	ENSRNOG00000002599, ENSRNOG00000000321, ENSRNOG00000019271, ENSRNOG00000014290, ENSRNOG00000005509, ENSRNOG00000012422, ENSRNOG00000013529
MF	GO:0004683	calmodulin-dependent protein kinase activity	5	0.00816091	0.275901	ENSRNOG00000027839, ENSRNOG00000058938, ENSRNOG00000011589, ENSRNOG00000004726, ENSRNOG00000017882
CC	GO:0032426	stereocilium tip	5	0.00832304	0.195579	ENSRNOG00000007017, ENSRNOG00000001700, ENSRNOG00000019430, ENSRNOG00000033087, ENSRNOG00000007047
BP	GO:0032695	negative regulation of interleukin-12 production	5	0.00835438	0.322652	ENSRNOG00000010665, ENSRNOG00000023258, ENSRNOG00000056574, ENSRNOG00000045829, ENSRNOG00000024210
MF	GO:0005080	protein kinase C binding	8	0.00867857	0.282536	ENSRNOG00000004158, ENSRNOG00000005214, ENSRNOG00000016434, ENSRNOG00000012061, ENSRNOG00000012820, ENSRNOG00000025895, ENSRNOG00000055597, ENSRNOG00000004131
CC	GO:1990779	glycoprotein Ib-IX-V complex	3	0.00879006	0.195579	ENSRNOG00000025959, ENSRNOG00000046981, ENSRNOG00000010015
CC	GO:0019815	B cell receptor complex	3	0.00879006	0.195579	ENSRNOG00000012160, ENSRNOG00000020125, ENSRNOG00000011917
BP	GO:2000525	positive regulation of T cell costimulation	3	0.00880912	0.332059	ENSRNOG00000014367, ENSRNOG00000010665, ENSRNOG00000002968
BP	GO:0033632	regulation of cell-cell adhesion mediated by integrin	3	0.00880912	0.332059	ENSRNOG00000021161, ENSRNOG00000030763, ENSRNOG00000000321
BP	GO:0000902	cell morphogenesis	11	0.00896907	0.332059	ENSRNOG00000006557, ENSRNOG00000009271, ENSRNOG00000036829, ENSRNOG00000025959, ENSRNOG00000026392, ENSRNOG00000002248, ENSRNOG00000017703, ENSRNOG00000052348, ENSRNOG00000013529, ENSRNOG00000001839, ENSRNOG00000013593
BP	GO:0031640	killing of cells of other organism	8	0.00899328	0.332059	ENSRNOG00000028015, ENSRNOG00000016278, ENSRNOG00000046449, ENSRNOG00000030093, ENSRNOG00000045617, ENSRNOG00000013768, ENSRNOG00000038135, ENSRNOG00000002829
BP	GO:0010628	positive regulation of gene expression	37	0.00925093	0.33786	ENSRNOG00000000053, ENSRNOG00000009705, ENSRNOG00000002014, ENSRNOG00000007049, ENSRNOG00000012912, ENSRNOG00000007922, ENSRNOG00000001128, ENSRNOG00000001700, ENSRNOG00000051986, ENSRNOG00000002419, ENSRNOG00000011680, ENSRNOG00000038004, ENSRNOG00000015310, ENSRNOG00000008052, ENSRNOG00000016846, ENSRNOG00000023258, ENSRNOG00000027037, ENSRNOG00000028015, ENSRNOG00000004444, ENSRNOG00000003476,…
MF	GO:0004713	protein tyrosine kinase activity	10	0.009823	0.304877	ENSRNOG00000054764, ENSRNOG00000009705, ENSRNOG00000012160, ENSRNOG00000027839, ENSRNOG00000013953, ENSRNOG00000010798, ENSRNOG00000052407, ENSRNOG00000008180, ENSRNOG00000019374, ENSRNOG00000004392
BP	GO:0048015	phosphatidylinositol-mediated signaling	7	0.00991238	0.354315	ENSRNOG00000019184, ENSRNOG00000016846, ENSRNOG00000008514, ENSRNOG00000029260, ENSRNOG00000029938, ENSRNOG00000020388, ENSRNOG00000009385
BP	GO:0050871	positive regulation of B cell activation	7	0.00991238	0.354315	ENSRNOG00000025990, ENSRNOG00000058590, ENSRNOG00000050000, ENSRNOG00000049870, ENSRNOG00000034190, ENSRNOG00000048161, ENSRNOG00000002968
MF	GO:0015279	store-operated calcium channel activity	4	0.0100585	0.304877	ENSRNOG00000006324, ENSRNOG00000020425, ENSRNOG00000001427, ENSRNOG00000011133
BP	GO:0034341	response to interferon-gamma	6	0.0100716	0.354878	ENSRNOG00000000451, ENSRNOG00000033215, ENSRNOG00000018735, ENSRNOG00000002659, ENSRNOG00000018488, ENSRNOG00000029993
BP	GO:0001771	immunological synapse formation	4	0.010245	0.354878	ENSRNOG00000015894, ENSRNOG00000030118, ENSRNOG00000006932, ENSRNOG00000017155
BP	GO:0060013	righting reflex	4	0.010245	0.354878	ENSRNOG00000015863, ENSRNOG00000013588, ENSRNOG00000014816, ENSRNOG00000033087
BP	GO:0007568	aging	24	0.0103819	0.355949	ENSRNOG00000000053, ENSRNOG00000007415, ENSRNOG00000009705, ENSRNOG00000006324, ENSRNOG00000028616, ENSRNOG00000002659, ENSRNOG00000017496, ENSRNOG00000051433, ENSRNOG00000019057, ENSRNOG00000016695, ENSRNOG00000024729, ENSRNOG00000046449, ENSRNOG00000018985, ENSRNOG00000019607, ENSRNOG00000017822, ENSRNOG00000014964, ENSRNOG00000013953, ENSRNOG00000016957, ENSRNOG00000003491, ENSRNOG00000007400,…
MF	GO:0005085	guanyl-nucleotide exchange factor activity	17	0.0113974	0.333945	ENSRNOG00000046050, ENSRNOG00000052391, ENSRNOG00000006932, ENSRNOG00000005404, ENSRNOG00000004736, ENSRNOG00000000528, ENSRNOG00000013321, ENSRNOG00000050430, ENSRNOG00000015894, ENSRNOG00000028090, ENSRNOG00000016910, ENSRNOG00000018716, ENSRNOG00000022373, ENSRNOG00000049378, ENSRNOG00000007422, ENSRNOG00000006079, ENSRNOG00000021098
BP	GO:0031589	cell-substrate adhesion	5	0.0116163	0.394251	ENSRNOG00000059140, ENSRNOG00000019689, ENSRNOG00000015603, ENSRNOG00000019430, ENSRNOG00000001518
BP	GO:0008360	regulation of cell shape	13	0.0121756	0.409099	ENSRNOG00000002540, ENSRNOG00000030118, ENSRNOG00000049361, ENSRNOG00000003207, ENSRNOG00000019430, ENSRNOG00000031168, ENSRNOG00000028090, ENSRNOG00000025209, ENSRNOG00000013072, ENSRNOG00000027839, ENSRNOG00000016724, ENSRNOG00000007047, ENSRNOG00000009760
MF	GO:0008066	glutamate receptor activity	4	0.012701	0.360136	ENSRNOG00000021468, ENSRNOG00000001575, ENSRNOG00000014290, ENSRNOG00000005662
CC	GO:0032009	early phagosome	4	0.0128955	0.267416	ENSRNOG00000013574, ENSRNOG00000012160, ENSRNOG00000048161, ENSRNOG00000017703
BP	GO:1901385	regulation of voltage-gated calcium channel activity	4	0.0129339	0.430277	ENSRNOG00000008865, ENSRNOG00000018378, ENSRNOG00000001173, ENSRNOG00000022044
CC	GO:0043025	neuronal cell body	38	0.0130203	0.267416	ENSRNOG00000001165, ENSRNOG00000005307, ENSRNOG00000003469, ENSRNOG00000011589, ENSRNOG00000001700, ENSRNOG00000056697, ENSRNOG00000018488, ENSRNOG00000038004, ENSRNOG00000008052, ENSRNOG00000027839, ENSRNOG00000013953, ENSRNOG00000015418, ENSRNOG00000042592, ENSRNOG00000020388, ENSRNOG00000006410, ENSRNOG00000005662, ENSRNOG00000008890, ENSRNOG00000006331, ENSRNOG00000005561, ENSRNOG00000001575,…
MF	GO:0005246	calcium channel regulator activity	6	0.0139486	0.37605	ENSRNOG00000012061, ENSRNOG00000020425, ENSRNOG00000005662, ENSRNOG00000018378, ENSRNOG00000001173, ENSRNOG00000022044
MF	GO:0004668	protein-arginine deiminase activity	3	0.0141179	0.37605	ENSRNOG00000006950, ENSRNOG00000037079, ENSRNOG00000007574
BP	GO:0007599	hemostasis	3	0.0143001	0.444891	ENSRNOG00000025959, ENSRNOG00000019689, ENSRNOG00000026039
BP	GO:0050849	negative regulation of calcium-mediated signaling	3	0.0143001	0.444891	ENSRNOG00000020337, ENSRNOG00000037339, ENSRNOG00000024000
BP	GO:0045622	regulation of T-helper cell differentiation	3	0.0143001	0.444891	ENSRNOG00000032844, ENSRNOG00000033215, ENSRNOG00000007270
BP	GO:0018101	protein citrullination	3	0.0143001	0.444891	ENSRNOG00000006950, ENSRNOG00000037079, ENSRNOG00000007574
BP	GO:0032831	positive regulation of CD4-positive, CD25-positive, alpha-beta regulatory T cell differentiation	3	0.0143001	0.444891	ENSRNOG00000032844, ENSRNOG00000033215, ENSRNOG00000003954
BP	GO:0002576	platelet degranulation	3	0.0143001	0.444891	ENSRNOG00000005214, ENSRNOG00000010798, ENSRNOG00000008180
BP	GO:0036414	histone citrullination	3	0.0143001	0.444891	ENSRNOG00000006950, ENSRNOG00000037079, ENSRNOG00000007574
BP	GO:0030335	positive regulation of cell migration	20	0.0148009	0.451399	ENSRNOG00000002188, ENSRNOG00000021161, ENSRNOG00000008941, ENSRNOG00000003866, ENSRNOG00000014290, ENSRNOG00000019430, ENSRNOG00000003614, ENSRNOG00000001229, ENSRNOG00000045829, ENSRNOG00000001518, ENSRNOG00000010121, ENSRNOG00000002419, ENSRNOG00000016695, ENSRNOG00000027839, ENSRNOG00000016846, ENSRNOG00000008180, ENSRNOG00000014548, ENSRNOG00000003491, ENSRNOG00000024452, ENSRNOG00000021560
BP	GO:0010595	positive regulation of endothelial cell migration	8	0.0148317	0.451399	ENSRNOG00000009184, ENSRNOG00000016434, ENSRNOG00000008941, ENSRNOG00000027839, ENSRNOG00000016846, ENSRNOG00000003491, ENSRNOG00000045829, ENSRNOG00000009385
BP	GO:0009612	response to mechanical stimulus	11	0.0153637	0.451399	ENSRNOG00000009705, ENSRNOG00000008941, ENSRNOG00000027839, ENSRNOG00000003357, ENSRNOG00000019607, ENSRNOG00000024237, ENSRNOG00000016957, ENSRNOG00000003491, ENSRNOG00000045829, ENSRNOG00000016695, ENSRNOG00000012660
BP	GO:0042742	defense response to bacterium	15	0.0155436	0.451399	ENSRNOG00000025990, ENSRNOG00000050000, ENSRNOG00000049870, ENSRNOG00000004623, ENSRNOG00000002217, ENSRNOG00000008707, ENSRNOG00000058590, ENSRNOG00000012160, ENSRNOG00000034190, ENSRNOG00000030093, ENSRNOG00000014964, ENSRNOG00000017869, ENSRNOG00000013768, ENSRNOG00000008394, ENSRNOG00000023143
BP	GO:0010613	positive regulation of cardiac muscle hypertrophy	5	0.0155985	0.451399	ENSRNOG00000014443, ENSRNOG00000011857, ENSRNOG00000009316, ENSRNOG00000011589, ENSRNOG00000003491
BP	GO:0002224	toll-like receptor signaling pathway	5	0.0155985	0.451399	ENSRNOG00000048161, ENSRNOG00000017703, ENSRNOG00000051986, ENSRNOG00000004726, ENSRNOG00000010266
BP	GO:0045582	positive regulation of T cell differentiation	5	0.0155985	0.451399	ENSRNOG00000002540, ENSRNOG00000000451, ENSRNOG00000004630, ENSRNOG00000018735, ENSRNOG00000000655
BP	GO:0009968	negative regulation of signal transduction	6	0.0159795	0.451399	ENSRNOG00000002730, ENSRNOG00000026936, ENSRNOG00000042592, ENSRNOG00000017020, ENSRNOG00000003959, ENSRNOG00000008187
BP	GO:0045954	positive regulation of natural killer cell mediated cytotoxicity	6	0.0159795	0.451399	ENSRNOG00000000097, ENSRNOG00000038197, ENSRNOG00000038286, ENSRNOG00000005404, ENSRNOG00000008153, ENSRNOG00000050430
BP	GO:0045060	negative thymic T cell selection	4	0.015987	0.451399	ENSRNOG00000010665, ENSRNOG00000018735, ENSRNOG00000006932, ENSRNOG00000000655
BP	GO:0001780	neutrophil homeostasis	4	0.015987	0.451399	ENSRNOG00000052407, ENSRNOG00000005905, ENSRNOG00000028198, ENSRNOG00000028377
BP	GO:0045893	positive regulation of transcription, DNA-templated	42	0.0161794	0.453024	ENSRNOG00000006831, ENSRNOG00000003069, ENSRNOG00000017191, ENSRNOG00000006418, ENSRNOG00000033215, ENSRNOG00000028845, ENSRNOG00000031778, ENSRNOG00000001128, ENSRNOG00000017030, ENSRNOG00000011762, ENSRNOG00000002659, ENSRNOG00000016166, ENSRNOG00000009184, ENSRNOG00000013850, ENSRNOG00000018803, ENSRNOG00000061070, ENSRNOG00000014666, ENSRNOG00000021833, ENSRNOG00000023258, ENSRNOG00000007400,…
BP	GO:0071300	cellular response to retinoic acid	9	0.0163648	0.454427	ENSRNOG00000003476, ENSRNOG00000025130, ENSRNOG00000055858, ENSRNOG00000027839, ENSRNOG00000008180, ENSRNOG00000028616, ENSRNOG00000002889, ENSRNOG00000001128, ENSRNOG00000005561
BP	GO:0001934	positive regulation of protein phosphorylation	19	0.0165807	0.455725	ENSRNOG00000054764, ENSRNOG00000012912, ENSRNOG00000033215, ENSRNOG00000004437, ENSRNOG00000003866, ENSRNOG00000007922, ENSRNOG00000005404, ENSRNOG00000010996, ENSRNOG00000012422, ENSRNOG00000018488, ENSRNOG00000022419, ENSRNOG00000018958, ENSRNOG00000018735, ENSRNOG00000013953, ENSRNOG00000008180, ENSRNOG00000003491, ENSRNOG00000022631, ENSRNOG00000013529, ENSRNOG00000006410
BP	GO:0070374	positive regulation of ERK1 and ERK2 cascade	18	0.0166828	0.455725	ENSRNOG00000033215, ENSRNOG00000003866, ENSRNOG00000011589, ENSRNOG00000005404, ENSRNOG00000000655, ENSRNOG00000018570, ENSRNOG00000016278, ENSRNOG00000046449, ENSRNOG00000015863, ENSRNOG00000016434, ENSRNOG00000027839, ENSRNOG00000018958, ENSRNOG00000019549, ENSRNOG00000016945, ENSRNOG00000018735, ENSRNOG00000013953, ENSRNOG00000003491, ENSRNOG00000007048
BP	GO:0043536	positive regulation of blood vessel endothelial cell migration	7	0.0173996	0.471473	ENSRNOG00000016434, ENSRNOG00000008941, ENSRNOG00000001229, ENSRNOG00000003491, ENSRNOG00000045829, ENSRNOG00000018488, ENSRNOG00000027037
BP	GO:0051924	regulation of calcium ion transport	6	0.0177523	0.477182	ENSRNOG00000003866, ENSRNOG00000020425, ENSRNOG00000017606, ENSRNOG00000011133, ENSRNOG00000011076, ENSRNOG00000011680
CC	GO:0043235	receptor complex	17	0.0178393	0.328051	ENSRNOG00000007129, ENSRNOG00000054764, ENSRNOG00000025130, ENSRNOG00000034007, ENSRNOG00000004405, ENSRNOG00000001575, ENSRNOG00000003954, ENSRNOG00000005954, ENSRNOG00000011211, ENSRNOG00000001804, ENSRNOG00000034164, ENSRNOG00000015441, ENSRNOG00000014367, ENSRNOG00000007270, ENSRNOG00000013953, ENSRNOG00000005662, ENSRNOG00000012819
CC	GO:0005925	focal adhesion	15	0.0182275	0.328051	ENSRNOG00000022071, ENSRNOG00000056944, ENSRNOG00000003476, ENSRNOG00000052064, ENSRNOG00000030118, ENSRNOG00000009824, ENSRNOG00000000655, ENSRNOG00000037765, ENSRNOG00000051952, ENSRNOG00000012002, ENSRNOG00000011680, ENSRNOG00000014476, ENSRNOG00000027839, ENSRNOG00000014548, ENSRNOG00000021560
MF	GO:0019900	kinase binding	11	0.0183011	0.473136	ENSRNOG00000000097, ENSRNOG00000006622, ENSRNOG00000004998, ENSRNOG00000023238, ENSRNOG00000022635, ENSRNOG00000013953, ENSRNOG00000021546, ENSRNOG00000010996, ENSRNOG00000006410, ENSRNOG00000019159, ENSRNOG00000013000
BP	GO:0007611	learning or memory	9	0.0186598	0.497593	ENSRNOG00000000168, ENSRNOG00000013953, ENSRNOG00000014548, ENSRNOG00000052219, ENSRNOG00000054371, ENSRNOG00000003491, ENSRNOG00000056697, ENSRNOG00000014816, ENSRNOG00000005662
CC	GO:0016323	basolateral plasma membrane	19	0.0188661	0.328051	ENSRNOG00000005302, ENSRNOG00000003134, ENSRNOG00000003069, ENSRNOG00000005307, ENSRNOG00000048161, ENSRNOG00000030118, ENSRNOG00000007922, ENSRNOG00000052219, ENSRNOG00000011133, ENSRNOG00000001518, ENSRNOG00000011076, ENSRNOG00000017775, ENSRNOG00000018985, ENSRNOG00000005291, ENSRNOG00000022635, ENSRNOG00000005196, ENSRNOG00000029131, ENSRNOG00000006410, ENSRNOG00000009760
BP	GO:0030838	positive regulation of actin filament polymerization	7	0.0189436	0.501186	ENSRNOG00000014476, ENSRNOG00000036829, ENSRNOG00000027839, ENSRNOG00000015603, ENSRNOG00000012852, ENSRNOG00000017155, ENSRNOG00000013177
BP	GO:0045579	positive regulation of B cell differentiation	4	0.0194093	0.509493	ENSRNOG00000036829, ENSRNOG00000012160, ENSRNOG00000003954, ENSRNOG00000017020
CC	GO:0030424	axon	30	0.0197433	0.328051	ENSRNOG00000006831, ENSRNOG00000003469, ENSRNOG00000019430, ENSRNOG00000012852, ENSRNOG00000001804, ENSRNOG00000056697, ENSRNOG00000033372, ENSRNOG00000038004, ENSRNOG00000013694, ENSRNOG00000018985, ENSRNOG00000027839, ENSRNOG00000013953, ENSRNOG00000020388, ENSRNOG00000049768, ENSRNOG00000005662, ENSRNOG00000009760, ENSRNOG00000005652, ENSRNOG00000011857, ENSRNOG00000032473, ENSRNOG00000014290,…
MF	GO:0043274	phospholipase binding	5	0.0198997	0.499768	ENSRNOG00000009705, ENSRNOG00000012160, ENSRNOG00000032247, ENSRNOG00000052407, ENSRNOG00000013967
BP	GO:0006911	phagocytosis, engulfment	8	0.0199766	0.520321	ENSRNOG00000025990, ENSRNOG00000058590, ENSRNOG00000050000, ENSRNOG00000031930, ENSRNOG00000049870, ENSRNOG00000034190, ENSRNOG00000021345, ENSRNOG00000007243
CC	GO:0045202	synapse	37	0.0200494	0.328051	ENSRNOG00000006557, ENSRNOG00000005307, ENSRNOG00000018260, ENSRNOG00000017030, ENSRNOG00000018286, ENSRNOG00000019430, ENSRNOG00000005509, ENSRNOG00000012852, ENSRNOG00000017155, ENSRNOG00000012573, ENSRNOG00000014264, ENSRNOG00000018985, ENSRNOG00000013654, ENSRNOG00000005662, ENSRNOG00000007047, ENSRNOG00000021098, ENSRNOG00000003476, ENSRNOG00000005697, ENSRNOG00000003512, ENSRNOG00000001575,…
CC	GO:0043679	axon terminus	10	0.0201779	0.328051	ENSRNOG00000006831, ENSRNOG00000043182, ENSRNOG00000005307, ENSRNOG00000012852, ENSRNOG00000042592, ENSRNOG00000014816, ENSRNOG00000005662, ENSRNOG00000011550, ENSRNOG00000008890, ENSRNOG00000014231
CC	GO:0043194	axon initial segment	5	0.0202728	0.328051	ENSRNOG00000022635, ENSRNOG00000011589, ENSRNOG00000012852, ENSRNOG00000011550, ENSRNOG00000011076
MF	GO:0032051	clathrin light chain binding	3	0.0206317	0.503758	ENSRNOG00000020644, ENSRNOG00000005700, ENSRNOG00000001091
BP	GO:1900028	negative regulation of ruffle assembly	3	0.0208942	0.540034	ENSRNOG00000002014, ENSRNOG00000014476, ENSRNOG00000056944
BP	GO:0042493	response to drug	31	0.0224894	0.57611	ENSRNOG00000009705, ENSRNOG00000003069, ENSRNOG00000036829, ENSRNOG00000004437, ENSRNOG00000001229, ENSRNOG00000027839, ENSRNOG00000014964, ENSRNOG00000013953, ENSRNOG00000023258, ENSRNOG00000009465, ENSRNOG00000020585, ENSRNOG00000007400, ENSRNOG00000008890, ENSRNOG00000007243, ENSRNOG00000003476, ENSRNOG00000005697, ENSRNOG00000025042, ENSRNOG00000012820, ENSRNOG00000045829, ENSRNOG00000000967,…
BP	GO:0090023	positive regulation of neutrophil chemotaxis	5	0.0230168	0.57611	ENSRNOG00000036829, ENSRNOG00000018804, ENSRNOG00000010665, ENSRNOG00000018735, ENSRNOG00000017882
BP	GO:0045744	negative regulation of G-protein coupled receptor protein signaling pathway	4	0.023203	0.57611	ENSRNOG00000005214, ENSRNOG00000006622, ENSRNOG00000018985, ENSRNOG00000033706
BP	GO:0043652	engulfment of apoptotic cell	4	0.023203	0.57611	ENSRNOG00000002540, ENSRNOG00000028636, ENSRNOG00000009180, ENSRNOG00000045829
BP	GO:0097028	dendritic cell differentiation	4	0.023203	0.57611	ENSRNOG00000054764, ENSRNOG00000017869, ENSRNOG00000010798, ENSRNOG00000008180
MF	GO:0003779	actin binding	19	0.0232086	0.537281	ENSRNOG00000005434, ENSRNOG00000006324, ENSRNOG00000052064, ENSRNOG00000003866, ENSRNOG00000030118, ENSRNOG00000019430, ENSRNOG00000016166, ENSRNOG00000014264, ENSRNOG00000059140, ENSRNOG00000014476, ENSRNOG00000018803, ENSRNOG00000019838, ENSRNOG00000016724, ENSRNOG00000046333, ENSRNOG00000061764, ENSRNOG00000001091, ENSRNOG00000006410, ENSRNOG00000007047, ENSRNOG00000022110
MF	GO:0034987	immunoglobulin receptor binding	6	0.0232272	0.537281	ENSRNOG00000025990, ENSRNOG00000058590, ENSRNOG00000050000, ENSRNOG00000049870, ENSRNOG00000003666, ENSRNOG00000034190
BP	GO:0007268	chemical synaptic transmission	15	0.0233188	0.57611	ENSRNOG00000003512, ENSRNOG00000018260, ENSRNOG00000001575, ENSRNOG00000032417, ENSRNOG00000054371, ENSRNOG00000014290, ENSRNOG00000018286, ENSRNOG00000018378, ENSRNOG00000014231, ENSRNOG00000046449, ENSRNOG00000021468, ENSRNOG00000013588, ENSRNOG00000022635, ENSRNOG00000005196, ENSRNOG00000005662
BP	GO:0030534	adult behavior	6	0.0238338	0.584537	ENSRNOG00000024729, ENSRNOG00000008728, ENSRNOG00000019271, ENSRNOG00000001575, ENSRNOG00000014816, ENSRNOG00000005662
BP	GO:0045907	positive regulation of vasoconstriction	7	0.0241298	0.587507	ENSRNOG00000007415, ENSRNOG00000014443, ENSRNOG00000003069, ENSRNOG00000018985, ENSRNOG00000018260, ENSRNOG00000012820, ENSRNOG00000020585
MF	GO:0005515	protein binding	84	0.0249951	0.56335	ENSRNOG00000034007, ENSRNOG00000052391, ENSRNOG00000031778, ENSRNOG00000019374, ENSRNOG00000054371, ENSRNOG00000012852, ENSRNOG00000051986, ENSRNOG00000001804, ENSRNOG00000012573, ENSRNOG00000019057, ENSRNOG00000012176, ENSRNOG00000033195, ENSRNOG00000027839, ENSRNOG00000013953, ENSRNOG00000008431, ENSRNOG00000006410, ENSRNOG00000025895, ENSRNOG00000006324, ENSRNOG00000008941, ENSRNOG00000006604,…
BP	GO:0051453	regulation of intracellular pH	5	0.0258913	0.625198	ENSRNOG00000003134, ENSRNOG00000015567, ENSRNOG00000005307, ENSRNOG00000004150, ENSRNOG00000001270
BP	GO:0048538	thymus development	7	0.0260499	0.625198	ENSRNOG00000004444, ENSRNOG00000016421, ENSRNOG00000004630, ENSRNOG00000055858, ENSRNOG00000009205, ENSRNOG00000045918, ENSRNOG00000024452
BP	GO:0051092	positive regulation of NF-kappaB transcription factor activity	13	0.0267036	0.636342	ENSRNOG00000011857, ENSRNOG00000017191, ENSRNOG00000048161, ENSRNOG00000017181, ENSRNOG00000008922, ENSRNOG00000051986, ENSRNOG00000000636, ENSRNOG00000018488, ENSRNOG00000019057, ENSRNOG00000016434, ENSRNOG00000012061, ENSRNOG00000013953, ENSRNOG00000003480
MF	GO:0003951	NAD+ kinase activity	4	0.0268973	0.58226	ENSRNOG00000001796, ENSRNOG00000017737, ENSRNOG00000023238, ENSRNOG00000017022
BP	GO:0033630	positive regulation of cell adhesion mediated by integrin	4	0.0273686	0.642602	ENSRNOG00000036829, ENSRNOG00000012160, ENSRNOG00000000321, ENSRNOG00000009465
BP	GO:0030593	neutrophil chemotaxis	8	0.0280087	0.642602	ENSRNOG00000028015, ENSRNOG00000016278, ENSRNOG00000036829, ENSRNOG00000012160, ENSRNOG00000005905, ENSRNOG00000003491, ENSRNOG00000002829, ENSRNOG00000050430
MF	GO:0001727	lipid kinase activity	3	0.0281434	0.58226	ENSRNOG00000017737, ENSRNOG00000029938, ENSRNOG00000017022
MF	GO:0035005	1-phosphatidylinositol-4-phosphate 3-kinase activity	3	0.0281434	0.58226	ENSRNOG00000016846, ENSRNOG00000029938, ENSRNOG00000009385
MF	GO:0005543	phospholipid binding	10	0.0284837	0.58226	ENSRNOG00000005434, ENSRNOG00000031930, ENSRNOG00000001374, ENSRNOG00000016945, ENSRNOG00000003526, ENSRNOG00000012852, ENSRNOG00000056012, ENSRNOG00000006079, ENSRNOG00000024452, ENSRNOG00000057753
BP	GO:0051572	negative regulation of histone H3-K4 methylation	3	0.0284963	0.642602	ENSRNOG00000034240, ENSRNOG00000011523, ENSRNOG00000017187
BP	GO:0071322	cellular response to carbohydrate stimulus	3	0.0284963	0.642602	ENSRNOG00000012061, ENSRNOG00000023258, ENSRNOG00000003491
BP	GO:0043372	positive regulation of CD4-positive, alpha-beta T cell differentiation	3	0.0284963	0.642602	ENSRNOG00000036829, ENSRNOG00000004409, ENSRNOG00000002968
BP	GO:0034162	toll-like receptor 9 signaling pathway	3	0.0284963	0.642602	ENSRNOG00000013309, ENSRNOG00000048161, ENSRNOG00000017703
BP	GO:0045621	positive regulation of lymphocyte differentiation	3	0.0284963	0.642602	ENSRNOG00000036829, ENSRNOG00000003954, ENSRNOG00000017020
BP	GO:0036336	dendritic cell migration	3	0.0284963	0.642602	ENSRNOG00000015894, ENSRNOG00000051619, ENSRNOG00000007047
BP	GO:0032496	response to lipopolysaccharide	19	0.0287445	0.643877	ENSRNOG00000002794, ENSRNOG00000004003, ENSRNOG00000010665, ENSRNOG00000028616, ENSRNOG00000051986, ENSRNOG00000004726, ENSRNOG00000017496, ENSRNOG00000051499, ENSRNOG00000014443, ENSRNOG00000009184, ENSRNOG00000007270, ENSRNOG00000019549, ENSRNOG00000014964, ENSRNOG00000046727, ENSRNOG00000052407, ENSRNOG00000020585, ENSRNOG00000020410, ENSRNOG00000007243, ENSRNOG00000024210
CC	GO:0097440	apical dendrite	5	0.028871	0.438184	ENSRNOG00000027839, ENSRNOG00000005307, ENSRNOG00000001700, ENSRNOG00000014816, ENSRNOG00000010938
CC	GO:0030667	secretory granule membrane	5	0.028871	0.438184	ENSRNOG00000003069, ENSRNOG00000030118, ENSRNOG00000003526, ENSRNOG00000001804, ENSRNOG00000012176
BP	GO:0007165	signal transduction	47	0.0293442	0.652958	ENSRNOG00000032247, ENSRNOG00000034007, ENSRNOG00000002599, ENSRNOG00000033215, ENSRNOG00000002730, ENSRNOG00000010996, ENSRNOG00000018286, ENSRNOG00000005905, ENSRNOG00000017155, ENSRNOG00000011680, ENSRNOG00000013220, ENSRNOG00000014443, ENSRNOG00000015359, ENSRNOG00000019838, ENSRNOG00000013280, ENSRNOG00000023258, ENSRNOG00000004470, ENSRNOG00000013836, ENSRNOG00000005342, ENSRNOG00000005278,…
CC	GO:0031012	extracellular matrix	19	0.0295405	0.438184	ENSRNOG00000002188, ENSRNOG00000003357, ENSRNOG00000003866, ENSRNOG00000058003, ENSRNOG00000010663, ENSRNOG00000033575, ENSRNOG00000001229, ENSRNOG00000045829, ENSRNOG00000010266, ENSRNOG00000016695, ENSRNOG00000012660, ENSRNOG00000020525, ENSRNOG00000060381, ENSRNOG00000015410, ENSRNOG00000025959, ENSRNOG00000019689, ENSRNOG00000023007, ENSRNOG00000004275, ENSRNOG00000028344
MF	GO:0000976	transcription regulatory region sequence-specific DNA binding	18	0.0300702	0.600722	ENSRNOG00000004444, ENSRNOG00000006831, ENSRNOG00000004588, ENSRNOG00000008904, ENSRNOG00000008941, ENSRNOG00000009722, ENSRNOG00000055915, ENSRNOG00000011523, ENSRNOG00000055650, ENSRNOG00000002659, ENSRNOG00000051499, ENSRNOG00000010121, ENSRNOG00000009184, ENSRNOG00000034240, ENSRNOG00000018803, ENSRNOG00000014666, ENSRNOG00000023258, ENSRNOG00000007400
BP	GO:0071345	cellular response to cytokine stimulus	7	0.0301884	0.664063	ENSRNOG00000054764, ENSRNOG00000003866, ENSRNOG00000010665, ENSRNOG00000023258, ENSRNOG00000010121, ENSRNOG00000016695, ENSRNOG00000018992
BP	GO:0009410	response to xenobiotic stimulus	31	0.0302386	0.664063	ENSRNOG00000009705, ENSRNOG00000003069, ENSRNOG00000036829, ENSRNOG00000004437, ENSRNOG00000001229, ENSRNOG00000027839, ENSRNOG00000014964, ENSRNOG00000013953, ENSRNOG00000023258, ENSRNOG00000009465, ENSRNOG00000020585, ENSRNOG00000007400, ENSRNOG00000008890, ENSRNOG00000007243, ENSRNOG00000003476, ENSRNOG00000005697, ENSRNOG00000025042, ENSRNOG00000012820, ENSRNOG00000045829, ENSRNOG00000000967,…
BP	GO:1900026	positive regulation of substrate adhesion-dependent cell spreading	6	0.0311165	0.674204	ENSRNOG00000002188, ENSRNOG00000013280, ENSRNOG00000007439, ENSRNOG00000014548, ENSRNOG00000037765, ENSRNOG00000021560
MF	GO:0030246	carbohydrate binding	14	0.0312522	0.610459	ENSRNOG00000037908, ENSRNOG00000059538, ENSRNOG00000002794, ENSRNOG00000000321, ENSRNOG00000001005, ENSRNOG00000001006, ENSRNOG00000057410, ENSRNOG00000037339, ENSRNOG00000057335, ENSRNOG00000059890, ENSRNOG00000008394, ENSRNOG00000005464, ENSRNOG00000009342, ENSRNOG00000007012
BP	GO:0007601	visual perception	11	0.0312888	0.674204	ENSRNOG00000015310, ENSRNOG00000005307, ENSRNOG00000013588, ENSRNOG00000046343, ENSRNOG00000006084, ENSRNOG00000005947, ENSRNOG00000020410, ENSRNOG00000018378, ENSRNOG00000016593, ENSRNOG00000001173, ENSRNOG00000022044
CC	GO:0016324	apical plasma membrane	25	0.0316466	0.456738	ENSRNOG00000005302, ENSRNOG00000030763, ENSRNOG00000005307, ENSRNOG00000052219, ENSRNOG00000003526, ENSRNOG00000012176, ENSRNOG00000013593, ENSRNOG00000017775, ENSRNOG00000018985, ENSRNOG00000018804, ENSRNOG00000007243, ENSRNOG00000006604, ENSRNOG00000048161, ENSRNOG00000030118, ENSRNOG00000012422, ENSRNOG00000050860, ENSRNOG00000057072, ENSRNOG00000015445, ENSRNOG00000015567, ENSRNOG00000046727,…
BP	GO:0033574	response to testosterone	8	0.0317577	0.674204	ENSRNOG00000000053, ENSRNOG00000014443, ENSRNOG00000009184, ENSRNOG00000019607, ENSRNOG00000013768, ENSRNOG00000020585, ENSRNOG00000045829, ENSRNOG00000007243
BP	GO:0006915	apoptotic process	27	0.0318442	0.674204	ENSRNOG00000006557, ENSRNOG00000048472, ENSRNOG00000009705, ENSRNOG00000004437, ENSRNOG00000005700, ENSRNOG00000002579, ENSRNOG00000031778, ENSRNOG00000005509, ENSRNOG00000003328, ENSRNOG00000009465, ENSRNOG00000004392, ENSRNOG00000004470, ENSRNOG00000005342, ENSRNOG00000002350, ENSRNOG00000005731, ENSRNOG00000001514, ENSRNOG00000017020, ENSRNOG00000013397, ENSRNOG00000012061, ENSRNOG00000018958,…
BP	GO:1990869	cellular response to chemokine	4	0.0319043	0.674204	ENSRNOG00000015894, ENSRNOG00000018985, ENSRNOG00000018804, ENSRNOG00000028198
BP	GO:0000188	inactivation of MAPK activity	4	0.0319043	0.674204	ENSRNOG00000004003, ENSRNOG00000013862, ENSRNOG00000014061, ENSRNOG00000003491
CC	GO:0034707	chloride channel complex	6	0.0336866	0.461248	ENSRNOG00000003512, ENSRNOG00000013588, ENSRNOG00000032417, ENSRNOG00000001742, ENSRNOG00000029682, ENSRNOG00000003915
CC	GO:0046658	anchored component of plasma membrane	6	0.0336866	0.461248	ENSRNOG00000000097, ENSRNOG00000013694, ENSRNOG00000000321, ENSRNOG00000006604, ENSRNOG00000032517, ENSRNOG00000000536
BP	GO:2000300	regulation of synaptic vesicle exocytosis	8	0.0337524	0.705837	ENSRNOG00000012061, ENSRNOG00000034007, ENSRNOG00000021468, ENSRNOG00000015603, ENSRNOG00000054371, ENSRNOG00000017606, ENSRNOG00000003491, ENSRNOG00000005662
BP	GO:0010811	positive regulation of cell-substrate adhesion	6	0.0338214	0.705837	ENSRNOG00000046449, ENSRNOG00000015603, ENSRNOG00000037765, ENSRNOG00000045829, ENSRNOG00000001518, ENSRNOG00000004275
BP	GO:0030154	cell differentiation	29	0.0355636	0.717673	ENSRNOG00000005984, ENSRNOG00000007887, ENSRNOG00000009705, ENSRNOG00000024120, ENSRNOG00000012912, ENSRNOG00000008138, ENSRNOG00000031778, ENSRNOG00000010798, ENSRNOG00000005404, ENSRNOG00000011762, ENSRNOG00000027839, ENSRNOG00000027916, ENSRNOG00000009465, ENSRNOG00000047002, ENSRNOG00000023077, ENSRNOG00000003136, ENSRNOG00000056944, ENSRNOG00000008904, ENSRNOG00000032137, ENSRNOG00000008941,…
CC	GO:0005829	cytosol	170	0.0356806	0.476337	ENSRNOG00000020081, ENSRNOG00000013309, ENSRNOG00000036829, ENSRNOG00000004437, ENSRNOG00000017191, ENSRNOG00000004677, ENSRNOG00000008514, ENSRNOG00000003866, ENSRNOG00000005404, ENSRNOG00000054371, ENSRNOG00000012852, ENSRNOG00000002659, ENSRNOG00000024729, ENSRNOG00000016421, ENSRNOG00000019413, ENSRNOG00000061070, ENSRNOG00000006170, ENSRNOG00000023238, ENSRNOG00000013836, ENSRNOG00000025895,…
BP	GO:0007288	sperm axoneme assembly	5	0.0357584	0.717673	ENSRNOG00000026914, ENSRNOG00000058275, ENSRNOG00000025787, ENSRNOG00000028077, ENSRNOG00000004430
MF	GO:0008270	zinc ion binding	40	0.0358537	0.685117	ENSRNOG00000006831, ENSRNOG00000024461, ENSRNOG00000027990, ENSRNOG00000004630, ENSRNOG00000034007, ENSRNOG00000017191, ENSRNOG00000006418, ENSRNOG00000005404, ENSRNOG00000003769, ENSRNOG00000054371, ENSRNOG00000003328, ENSRNOG00000007044, ENSRNOG00000022483, ENSRNOG00000028344, ENSRNOG00000005278, ENSRNOG00000008947, ENSRNOG00000052062, ENSRNOG00000003734, ENSRNOG00000012723, ENSRNOG00000008922,…
BP	GO:0007626	locomotory behavior	10	0.0360463	0.717673	ENSRNOG00000003476, ENSRNOG00000014290, ENSRNOG00000004606, ENSRNOG00000005509, ENSRNOG00000020410, ENSRNOG00000014816, ENSRNOG00000033087, ENSRNOG00000008890, ENSRNOG00000031100, ENSRNOG00000021285
BP	GO:0045779	negative regulation of bone resorption	4	0.0368067	0.717673	ENSRNOG00000003069, ENSRNOG00000019374, ENSRNOG00000017020, ENSRNOG00000008187
BP	GO:0022010	central nervous system myelination	4	0.0368067	0.717673	ENSRNOG00000013850, ENSRNOG00000015445, ENSRNOG00000019271, ENSRNOG00000002419
BP	GO:0016082	synaptic vesicle priming	4	0.0368067	0.717673	ENSRNOG00000015148, ENSRNOG00000007636, ENSRNOG00000001867, ENSRNOG00000008570
BP	GO:0002819	regulation of adaptive immune response	3	0.0370172	0.717673	ENSRNOG00000004003, ENSRNOG00000020148, ENSRNOG00000002968
BP	GO:0051574	positive regulation of histone H3-K9 methylation	3	0.0370172	0.717673	ENSRNOG00000055858, ENSRNOG00000009218, ENSRNOG00000045918
BP	GO:0030011	maintenance of cell polarity	3	0.0370172	0.717673	ENSRNOG00000036829, ENSRNOG00000024452, ENSRNOG00000016166
BP	GO:0002638	negative regulation of immunoglobulin production	3	0.0370172	0.717673	ENSRNOG00000037339, ENSRNOG00000024000, ENSRNOG00000007255
BP	GO:0033152	immunoglobulin V(D)J recombination	3	0.0370172	0.717673	ENSRNOG00000009184, ENSRNOG00000014605, ENSRNOG00000051499
BP	GO:0042492	gamma-delta T cell differentiation	3	0.0370172	0.717673	ENSRNOG00000009705, ENSRNOG00000012160, ENSRNOG00000000655
BP	GO:0048709	oligodendrocyte differentiation	7	0.0371652	0.717673	ENSRNOG00000018985, ENSRNOG00000013850, ENSRNOG00000004003, ENSRNOG00000034025, ENSRNOG00000019374, ENSRNOG00000017496, ENSRNOG00000011133
BP	GO:0050829	defense response to Gram-negative bacterium	9	0.0374072	0.718218	ENSRNOG00000000097, ENSRNOG00000046449, ENSRNOG00000014666, ENSRNOG00000034190, ENSRNOG00000030093, ENSRNOG00000048161, ENSRNOG00000013768, ENSRNOG00000038115, ENSRNOG00000038135
CC	GO:0042995	cell projection	13	0.0379432	0.489215	ENSRNOG00000005434, ENSRNOG00000002540, ENSRNOG00000031930, ENSRNOG00000056944, ENSRNOG00000005697, ENSRNOG00000030118, ENSRNOG00000017496, ENSRNOG00000015410, ENSRNOG00000027839, ENSRNOG00000019607, ENSRNOG00000015614, ENSRNOG00000048706, ENSRNOG00000008890
BP	GO:0032956	regulation of actin cytoskeleton organization	8	0.0379875	0.725216	ENSRNOG00000002540, ENSRNOG00000014548, ENSRNOG00000001091, ENSRNOG00000019430, ENSRNOG00000013836, ENSRNOG00000003064, ENSRNOG00000012002, ENSRNOG00000021285
BP	GO:0050790	regulation of catalytic activity	23	0.038401	0.728967	ENSRNOG00000046050, ENSRNOG00000049033, ENSRNOG00000056944, ENSRNOG00000006932, ENSRNOG00000052219, ENSRNOG00000017065, ENSRNOG00000003959, ENSRNOG00000000528, ENSRNOG00000012045, ENSRNOG00000013321, ENSRNOG00000050430, ENSRNOG00000015894, ENSRNOG00000028090, ENSRNOG00000018716, ENSRNOG00000015359, ENSRNOG00000019838, ENSRNOG00000015614, ENSRNOG00000052407, ENSRNOG00000015603, ENSRNOG00000013836,…
CC	GO:0005770	late endosome	12	0.0393911	0.489215	ENSRNOG00000028247, ENSRNOG00000008052, ENSRNOG00000049491, ENSRNOG00000020644, ENSRNOG00000007439, ENSRNOG00000003866, ENSRNOG00000002579, ENSRNOG00000005700, ENSRNOG00000018735, ENSRNOG00000013953, ENSRNOG00000020337, ENSRNOG00000012176
CC	GO:0034451	centriolar satellite	10	0.0393937	0.489215	ENSRNOG00000016377, ENSRNOG00000016467, ENSRNOG00000009722, ENSRNOG00000025643, ENSRNOG00000004430, ENSRNOG00000032970, ENSRNOG00000019057, ENSRNOG00000014275, ENSRNOG00000024210, ENSRNOG00000015441
BP	GO:0046627	negative regulation of insulin receptor signaling pathway	6	0.0396568	0.748578	ENSRNOG00000012061, ENSRNOG00000034025, ENSRNOG00000003491, ENSRNOG00000020388, ENSRNOG00000012178, ENSRNOG00000019057
BP	GO:0043154	negative regulation of cysteine-type endopeptidase activity involved in apoptotic process	8	0.04023	0.755156	ENSRNOG00000005731, ENSRNOG00000004630, ENSRNOG00000018803, ENSRNOG00000018958, ENSRNOG00000009465, ENSRNOG00000004470, ENSRNOG00000045829, ENSRNOG00000022792
MF	GO:0005102	receptor binding	23	0.0405993	0.759294	ENSRNOG00000000097, ENSRNOG00000006831, ENSRNOG00000009705, ENSRNOG00000013309, ENSRNOG00000030763, ENSRNOG00000032247, ENSRNOG00000005700, ENSRNOG00000030118, ENSRNOG00000010798, ENSRNOG00000000655, ENSRNOG00000056574, ENSRNOG00000012881, ENSRNOG00000018895, ENSRNOG00000012160, ENSRNOG00000051905, ENSRNOG00000027839, ENSRNOG00000008180, ENSRNOG00000015603, ENSRNOG00000014758, ENSRNOG00000029386,…
BP	GO:0071222	cellular response to lipopolysaccharide	19	0.040962	0.764623	ENSRNOG00000028015, ENSRNOG00000002014, ENSRNOG00000048161, ENSRNOG00000017181, ENSRNOG00000005905, ENSRNOG00000002968, ENSRNOG00000010266, ENSRNOG00000034164, ENSRNOG00000018488, ENSRNOG00000038135, ENSRNOG00000002829, ENSRNOG00000018238, ENSRNOG00000019689, ENSRNOG00000030093, ENSRNOG00000017869, ENSRNOG00000046727, ENSRNOG00000023258, ENSRNOG00000004470, ENSRNOG00000020585
BP	GO:0035690	cellular response to drug	9	0.0414411	0.769293	ENSRNOG00000003866, ENSRNOG00000046727, ENSRNOG00000005905, ENSRNOG00000056783, ENSRNOG00000003480, ENSRNOG00000020410, ENSRNOG00000007048, ENSRNOG00000008890, ENSRNOG00000050860
BP	GO:0097284	hepatocyte apoptotic process	4	0.0420708	0.776692	ENSRNOG00000012439, ENSRNOG00000037765, ENSRNOG00000013529, ENSRNOG00000009385
BP	GO:0031532	actin cytoskeleton reorganization	7	0.0423446	0.777474	ENSRNOG00000005214, ENSRNOG00000051619, ENSRNOG00000052064, ENSRNOG00000007922, ENSRNOG00000012422, ENSRNOG00000007047, ENSRNOG00000014264
BP	GO:0010033	response to organic substance	13	0.0427016	0.779768	ENSRNOG00000002089, ENSRNOG00000003893, ENSRNOG00000002188, ENSRNOG00000027990, ENSRNOG00000003476, ENSRNOG00000004003, ENSRNOG00000033215, ENSRNOG00000000168, ENSRNOG00000002889, ENSRNOG00000014964, ENSRNOG00000023238, ENSRNOG00000052407, ENSRNOG00000017606
BP	GO:0051928	positive regulation of calcium ion transport	5	0.0433864	0.78799	ENSRNOG00000006324, ENSRNOG00000017822, ENSRNOG00000018378, ENSRNOG00000018895, ENSRNOG00000011076
MF	GO:0042802	identical protein binding	89	0.043732	0.800842	ENSRNOG00000013309, ENSRNOG00000030763, ENSRNOG00000003069, ENSRNOG00000004630, ENSRNOG00000006418, ENSRNOG00000017191, ENSRNOG00000004437, ENSRNOG00000034007, ENSRNOG00000005404, ENSRNOG00000019374, ENSRNOG00000012852, ENSRNOG00000002419, ENSRNOG00000017874, ENSRNOG00000016421, ENSRNOG00000015896, ENSRNOG00000016467, ENSRNOG00000020125, ENSRNOG00000018804, ENSRNOG00000014964, ENSRNOG00000023238,…
BP	GO:0019221	cytokine-mediated signaling pathway	11	0.0443626	0.793263	ENSRNOG00000028015, ENSRNOG00000054764, ENSRNOG00000015773, ENSRNOG00000007270, ENSRNOG00000031081, ENSRNOG00000003954, ENSRNOG00000005954, ENSRNOG00000014816, ENSRNOG00000028377, ENSRNOG00000011680, ENSRNOG00000015441
CC	GO:0005576	extracellular region	46	0.0448261	0.540146	ENSRNOG00000000053, ENSRNOG00000048472, ENSRNOG00000005883, ENSRNOG00000030763, ENSRNOG00000019271, ENSRNOG00000008138, ENSRNOG00000001006, ENSRNOG00000011140, ENSRNOG00000056092, ENSRNOG00000020148, ENSRNOG00000014963, ENSRNOG00000058275, ENSRNOG00000014964, ENSRNOG00000022009, ENSRNOG00000016945, ENSRNOG00000009465, ENSRNOG00000004470, ENSRNOG00000024986, ENSRNOG00000042771, ENSRNOG00000047002,…
BP	GO:0022008	neurogenesis	8	0.0449696	0.793263	ENSRNOG00000005984, ENSRNOG00000009271, ENSRNOG00000019271, ENSRNOG00000009218, ENSRNOG00000003866, ENSRNOG00000014605, ENSRNOG00000014816, ENSRNOG00000005561
BP	GO:0006821	chloride transport	7	0.0450958	0.793263	ENSRNOG00000057072, ENSRNOG00000023427, ENSRNOG00000013588, ENSRNOG00000032417, ENSRNOG00000001742, ENSRNOG00000029682, ENSRNOG00000003915
BP	GO:0032757	positive regulation of interleukin-8 production	7	0.0450958	0.793263	ENSRNOG00000037908, ENSRNOG00000012160, ENSRNOG00000016434, ENSRNOG00000030093, ENSRNOG00000048161, ENSRNOG00000018735, ENSRNOG00000009342
BP	GO:0048678	response to axon injury	7	0.0450958	0.793263	ENSRNOG00000006604, ENSRNOG00000013953, ENSRNOG00000008180, ENSRNOG00000051986, ENSRNOG00000014816, ENSRNOG00000014021, ENSRNOG00000018992
CC	GO:0031902	late endosome membrane	9	0.0455179	0.540146	ENSRNOG00000032844, ENSRNOG00000008052, ENSRNOG00000049491, ENSRNOG00000033215, ENSRNOG00000013953, ENSRNOG00000014816, ENSRNOG00000030431, ENSRNOG00000026310, ENSRNOG00000022792
BP	GO:1902895	positive regulation of pri-miRNA transcription from RNA polymerase II promoter	6	0.0460676	0.793263	ENSRNOG00000009271, ENSRNOG00000055858, ENSRNOG00000008941, ENSRNOG00000018803, ENSRNOG00000023258, ENSRNOG00000007400
BP	GO:0007597	blood coagulation, intrinsic pathway	3	0.0463727	0.793263	ENSRNOG00000025959, ENSRNOG00000046981, ENSRNOG00000010015
BP	GO:0002115	store-operated calcium entry	3	0.0463727	0.793263	ENSRNOG00000020945, ENSRNOG00000020425, ENSRNOG00000001427
BP	GO:0043304	regulation of mast cell degranulation	3	0.0463727	0.793263	ENSRNOG00000007439, ENSRNOG00000010798, ENSRNOG00000008180
BP	GO:0090175	regulation of establishment of planar polarity	3	0.0463727	0.793263	ENSRNOG00000008138, ENSRNOG00000009465, ENSRNOG00000025787
MF	GO:0004114	3',5'-cyclic-nucleotide phosphodiesterase activity	4	0.0469055	0.841428	ENSRNOG00000014443, ENSRNOG00000025042, ENSRNOG00000005905, ENSRNOG00000016593
BP	GO:0051491	positive regulation of filopodium assembly	5	0.0475164	0.793263	ENSRNOG00000018804, ENSRNOG00000013321, ENSRNOG00000009760, ENSRNOG00000019057, ENSRNOG00000018992
BP	GO:0030198	extracellular matrix organization	13	0.0475643	0.793263	ENSRNOG00000024120, ENSRNOG00000003357, ENSRNOG00000010663, ENSRNOG00000001229, ENSRNOG00000016695, ENSRNOG00000012660, ENSRNOG00000020525, ENSRNOG00000060381, ENSRNOG00000009271, ENSRNOG00000023007, ENSRNOG00000048706, ENSRNOG00000004275, ENSRNOG00000028344
BP	GO:0035584	calcium-mediated signaling using intracellular calcium source	4	0.0476902	0.793263	ENSRNOG00000002794, ENSRNOG00000000655, ENSRNOG00000034025, ENSRNOG00000013768
BP	GO:0030220	platelet formation	4	0.0476902	0.793263	ENSRNOG00000026936, ENSRNOG00000002829, ENSRNOG00000028377, ENSRNOG00000057335
BP	GO:0090660	cerebrospinal fluid circulation	4	0.0476902	0.793263	ENSRNOG00000019271, ENSRNOG00000008138, ENSRNOG00000058275, ENSRNOG00000025787
BP	GO:0043149	stress fiber assembly	4	0.0476902	0.793263	ENSRNOG00000027839, ENSRNOG00000025787, ENSRNOG00000016166, ENSRNOG00000014264
BP	GO:0045638	negative regulation of myeloid cell differentiation	4	0.0476902	0.793263	ENSRNOG00000025297, ENSRNOG00000027839, ENSRNOG00000004606, ENSRNOG00000002969
MF	GO:0097110	scaffold protein binding	8	0.0485795	0.854027	ENSRNOG00000012160, ENSRNOG00000018985, ENSRNOG00000008180, ENSRNOG00000051986, ENSRNOG00000006410, ENSRNOG00000017155, ENSRNOG00000001804, ENSRNOG00000023143
BP	GO:0050731	positive regulation of peptidyl-tyrosine phosphorylation	10	0.0495673	0.820424	ENSRNOG00000012160, ENSRNOG00000032247, ENSRNOG00000027839, ENSRNOG00000000321, ENSRNOG00000006604, ENSRNOG00000018735, ENSRNOG00000000655, ENSRNOG00000034025, ENSRNOG00000051986, ENSRNOG00000012819
