# Supplementary material for: Transcription analyses of differentially expressed mRNAs, lncRNAs, circRNAs, and miRNAs in the growth plate of rats with glucocorticoid-induced growth retardation
Source: PeerJ. 2023 Jan 16;11:e14603. doi: 10.7717/peerj.14603 (PMC9851049; doi:10.7717/peerj.14603)
Supplement: Supplemental Information 8 [file peerj-11-14603-s008.xlsx]

## Sheet: 7d ceRNA
RNA_name	shared name	type	up_down	Degree
rno-miR-351-5p	rno-miR-351-5p	sRNA	up	61
rno-miR-326-3p	rno-miR-326-3p	sRNA	down	38
rno-miR-673-5p	rno-miR-673-5p	sRNA	up	36
rno-miR-483-3p	rno-miR-483-3p	sRNA	up	31
rno-miR-455-3p	rno-miR-455-3p	sRNA	up	26
rno-miR-370-5p	rno-miR-370-5p	sRNA	up	22
rno-miR-204-5p	rno-miR-204-5p	sRNA	up	21
rno-miR-874-3p	rno-miR-874-3p	sRNA	down	20
rno-miR-3064-5p	rno-miR-3064-5p	sRNA	up	19
rno-miR-140-3p	rno-miR-140-3p	sRNA	up	19
rno-miR-409b	rno-miR-409b	sRNA	up	18
rno-miR-20b-3p	rno-miR-20b-3p	sRNA	down	17
rno-miR-449a-5p	rno-miR-449a-5p	sRNA	down	14
rno-miR-150-5p	rno-miR-150-5p	sRNA	down	11
LINC3570	TCONS_00193678	lncRNA	up	11
LINC3384	TCONS_00184191	lncRNA	down	11
LINC3000	TCONS_00162214	lncRNA	down	11
rno-miR-150-3p	rno-miR-150-3p	sRNA	down	10
rno-miR-224-5p	rno-miR-224-5p	sRNA	up	10
Plcd3-OT1	TCONS_00039068	lncRNA	up	9
rno-miR-130b-5p	rno-miR-130b-5p	sRNA	down	8
rno-miR-17-2-3p	rno-miR-17-2-3p	sRNA	down	8
rno-let-7g-3p	rno-let-7g-3p	sRNA	down	8
Slc16a6-OT1	TCONS_00039470	lncRNA	up	8
AABR07065353.1-OT3	TCONS_00179937	lncRNA	down	8
AABR07065353.1-OT2	TCONS_00179936	lncRNA	down	8
Celf2-OT1	TCONS_00088006	lncRNA	down	8
rno-miR-127-3p	rno-miR-127-3p	sRNA	up	8
LINC3862	TCONS_00210497	lncRNA	down	7
AABR07071195.1-OT1	TCONS_00211043	lncRNA	down	7
rno-miR-139-3p	rno-miR-139-3p	sRNA	down	6
rno-miR-130b-3p	rno-miR-130b-3p	sRNA	down	6
rno-miR-301a-5p	rno-miR-301a-5p	sRNA	down	6
novel_335	novel_335	sRNA	down	6
rno-miR-483-5p	rno-miR-483-5p	sRNA	up	6
Smim22-OT4	TCONS_00033488	lncRNA	down	6
LINC237	TCONS_00014591	lncRNA	down	6
rno-miR-106b-5p	rno-miR-106b-5p	sRNA	down	5
rno-miR-301b-5p	rno-miR-301b-5p	sRNA	down	5
AABR07057997.1-201	ENSRNOT00000090860	lncRNA	up	5
LINC494	TCONS_00028968	lncRNA	up	5
Smim5-OT2	TCONS_00032341	lncRNA	down	5
Smim5-OT7	TCONS_00032336	lncRNA	down	5
LINC1499	TCONS_00082000	lncRNA	down	5
LINC2710	TCONS_00145650	lncRNA	down	5
Rflna	ENSRNOG00000001011	mRNA	up	4
rno-miR-191a-5p	rno-miR-191a-5p	sRNA	down	4
LINC305	TCONS_00018280	lncRNA	up	4
rno-miR-128-3p	rno-miR-128-3p	sRNA	down	4
novel_circ_0006375	novel_circ_0006375	circRNA	up	3
Drd2	ENSRNOG00000008428	mRNA	up	3
Gna13-OT1	TCONS_00032001	lncRNA	up	3
Supt5h-202	ENSRNOT00000093345	lncRNA	up	3
LINC3612	TCONS_00195344	lncRNA	up	3
Gpr176-OT1	TCONS_00142674	lncRNA	up	3
Zfp964-AS1	TCONS_00079141	lncRNA	up	3
Ptprj	ENSRNOG00000034025	mRNA	down	3
LINC2802	TCONS_00150581	lncRNA	down	3
Cpne4-OT1	TCONS_00205298	lncRNA	down	3
LINC2399	TCONS_00126277	lncRNA	down	3
AC134759.1-201	ENSRNOT00000088115	lncRNA	down	3
LINC2079	TCONS_00110456	lncRNA	down	3
AABR07060980.1-OT1	TCONS_00150578	lncRNA	down	3
LOC689757-AS1	TCONS_00153113	lncRNA	down	3
Ighm-AS1	TCONS_00180960	lncRNA	down	3
AABR07035780.2-202	ENSRNOT00000092040	lncRNA	down	3
Ubl5-OT6	TCONS_00201012	lncRNA	down	3
LINC3303	TCONS_00181040	lncRNA	down	3
LINC2746	TCONS_00146159	lncRNA	down	3
novel_circ_0000179	novel_circ_0000179	circRNA	up	2
Dbp	ENSRNOG00000021027	mRNA	up	2
Snx10	ENSRNOG00000011944	mRNA	up	2
Nfasc	ENSRNOG00000030515	mRNA	up	2
Pfkfb3	ENSRNOG00000018911	mRNA	up	2
Epn2	ENSRNOG00000060550	mRNA	up	2
Oas1g	ENSRNOG00000047076	mRNA	up	2
Cadm3	ENSRNOG00000003365	mRNA	up	2
Col6a2	ENSRNOG00000001254	mRNA	up	2
Ralgds	ENSRNOG00000010219	mRNA	up	2
Gabra3	ENSRNOG00000056558	mRNA	up	2
Rarg	ENSRNOG00000012499	mRNA	up	2
Prl7a3-AS1	TCONS_00091079	lncRNA	up	2
LINC2744	TCONS_00146145	lncRNA	up	2
Tbcel-AS7	TCONS_00202128	lncRNA	up	2
novel_circ_0002221	novel_circ_0002221	circRNA	down	2
novel_circ_0005259	novel_circ_0005259	circRNA	down	2
novel_circ_0001550	novel_circ_0001550	circRNA	down	2
Agap2	ENSRNOG00000025584	mRNA	down	2
Ephb6	ENSRNOG00000014367	mRNA	down	2
Kif21b	ENSRNOG00000008471	mRNA	down	2
Srrm3	ENSRNOG00000001439	mRNA	down	2
Spn	ENSRNOG00000036711	mRNA	down	2
Ttc7a	ENSRNOG00000014879	mRNA	down	2
Cmip	ENSRNOG00000013178	mRNA	down	2
LINC1392	TCONS_00075530	lncRNA	down	2
LINC1785	TCONS_00095250	lncRNA	down	2
LOC102555023-202	ENSRNOT00000092862	lncRNA	down	2
Ighm-OT1	TCONS_00186653	lncRNA	down	2
Pax5-AS1	TCONS_00162677	lncRNA	down	2
AABR07044980.1-201	ENSRNOT00000091080	lncRNA	down	2
LINC858	TCONS_00047051	lncRNA	down	2
LINC781	TCONS_00043601	lncRNA	down	2
novel_circ_0003974	novel_circ_0003974	circRNA	up	1
novel_circ_0002726	novel_circ_0002726	circRNA	up	1
novel_circ_0004659	novel_circ_0004659	circRNA	up	1
Slc9a6	ENSRNOG00000000879	mRNA	up	1
Spsb4	ENSRNOG00000012862	mRNA	up	1
Aqp8	ENSRNOG00000014652	mRNA	up	1
Pbx1	ENSRNOG00000004693	mRNA	up	1
Mtmr10	ENSRNOG00000016090	mRNA	up	1
Sned1	ENSRNOG00000023548	mRNA	up	1
Smo	ENSRNOG00000008332	mRNA	up	1
Atf3	ENSRNOG00000003745	mRNA	up	1
Mrc2	ENSRNOG00000006548	mRNA	up	1
Ccdc80	ENSRNOG00000002052	mRNA	up	1
Arsb	ENSRNOG00000011150	mRNA	up	1
Galnt14	ENSRNOG00000007951	mRNA	up	1
Tppp3	ENSRNOG00000016890	mRNA	up	1
Tubb6	ENSRNOG00000018371	mRNA	up	1
Gpx3	ENSRNOG00000052564	mRNA	up	1
LOC498368	ENSRNOG00000002191	mRNA	up	1
Homer1	ENSRNOG00000047014	mRNA	up	1
Agt	ENSRNOG00000018445	mRNA	up	1
Angpt1	ENSRNOG00000005854	mRNA	up	1
Asph	ENSRNOG00000007445	mRNA	up	1
Bpifc	ENSRNOG00000022937	mRNA	up	1
Tmtc1	ENSRNOG00000001854	mRNA	up	1
Trpv4	ENSRNOG00000001195	mRNA	up	1
St7l	ENSRNOG00000014002	mRNA	up	1
Fgf2	ENSRNOG00000017392	mRNA	up	1
Osbpl5	ENSRNOG00000020713	mRNA	up	1
Tpd52	ENSRNOG00000011441	mRNA	up	1
Smoc1	ENSRNOG00000005998	mRNA	up	1
Twsg1	ENSRNOG00000013340	mRNA	up	1
Stk33	ENSRNOG00000014590	mRNA	up	1
Ifi27l2b	ENSRNOG00000026605	mRNA	up	1
Ppp1r1b	ENSRNOG00000028404	mRNA	up	1
Tgfbr1	ENSRNOG00000007036	mRNA	up	1
Cgnl1	ENSRNOG00000054080	mRNA	up	1
Slfn5	ENSRNOG00000021719	mRNA	up	1
Myrip	ENSRNOG00000018797	mRNA	up	1
Sfrp5	ENSRNOG00000014940	mRNA	up	1
Inka2	ENSRNOG00000015691	mRNA	up	1
Dlc1	ENSRNOG00000010780	mRNA	up	1
Ppm1h	ENSRNOG00000004314	mRNA	up	1
Mtss2	ENSRNOG00000017500	mRNA	up	1
Stmn4	ENSRNOG00000053334	mRNA	up	1
Accsl	ENSRNOG00000042533	mRNA	up	1
Fam163a	ENSRNOG00000024825	mRNA	up	1
Csf1	ENSRNOG00000018659	mRNA	up	1
Slc16a2	ENSRNOG00000002832	mRNA	up	1
Dagla	ENSRNOG00000027264	mRNA	up	1
Tef	ENSRNOG00000019383	mRNA	up	1
Dpt	ENSRNOG00000002947	mRNA	up	1
Tns1	ENSRNOG00000014182	mRNA	up	1
Mrgprf	ENSRNOG00000013426	mRNA	up	1
Kcnd3	ENSRNOG00000014686	mRNA	up	1
Brsk1	ENSRNOG00000017673	mRNA	up	1
Arhgap29	ENSRNOG00000012563	mRNA	up	1
Cytl1	ENSRNOG00000028108	mRNA	up	1
Srpx2	ENSRNOG00000003715	mRNA	up	1
AABR07007068.1	ENSRNOG00000017438	mRNA	up	1
Acp5	ENSRNOG00000046261	mRNA	up	1
Etnk2	ENSRNOG00000028368	mRNA	up	1
Prkd1	ENSRNOG00000004165	mRNA	up	1
Marveld3	ENSRNOG00000016291	mRNA	up	1
C1qtnf7	ENSRNOG00000005094	mRNA	up	1
Synj1	ENSRNOG00000002051	mRNA	up	1
Tlk1	ENSRNOG00000060572	mRNA	up	1
C1qb	ENSRNOG00000012749	mRNA	up	1
Usp12-AS1	TCONS_00050778	lncRNA	up	1
Cd200r1-AS1	TCONS_00042371	lncRNA	up	1
LOC103689961-OT2	TCONS_00016210	lncRNA	up	1
Fign-AS1	TCONS_00131704	lncRNA	up	1
AABR07039316.1-201	ENSRNOT00000076843	lncRNA	up	1
Ttc5-OT1	TCONS_00074717	lncRNA	up	1
AABR07066677.1-OT1	TCONS_00213369	lncRNA	up	1
LINC4147	TCONS_00223242	lncRNA	up	1
Lcor-OT1	TCONS_00011851	lncRNA	up	1
B3galt1-AS1	TCONS_00140664	lncRNA	up	1
Naip2-AS1	TCONS_00106804	lncRNA	up	1
novel_circ_0007504	novel_circ_0007504	circRNA	down	1
novel_circ_0003766	novel_circ_0003766	circRNA	down	1
novel_circ_0003735	novel_circ_0003735	circRNA	down	1
novel_circ_0001818	novel_circ_0001818	circRNA	down	1
novel_circ_0006520	novel_circ_0006520	circRNA	down	1
Nckap1l	ENSRNOG00000036829	mRNA	down	1
Pigr	ENSRNOG00000004405	mRNA	down	1
Rnf145	ENSRNOG00000004602	mRNA	down	1
Arl5c	ENSRNOG00000036880	mRNA	down	1
Sit1	ENSRNOG00000021546	mRNA	down	1
Gnaz	ENSRNOG00000001313	mRNA	down	1
Reep2	ENSRNOG00000049629	mRNA	down	1
Aldh1b1	ENSRNOG00000011497	mRNA	down	1
Nav2	ENSRNOG00000014530	mRNA	down	1
Prom1	ENSRNOG00000003098	mRNA	down	1
Dusp5	ENSRNOG00000014061	mRNA	down	1
Cmtm7	ENSRNOG00000010986	mRNA	down	1
Shkbp1	ENSRNOG00000020882	mRNA	down	1
Comp	ENSRNOG00000048472	mRNA	down	1
Csrnp1	ENSRNOG00000033433	mRNA	down	1
Nln	ENSRNOG00000011561	mRNA	down	1
Septin6	ENSRNOG00000043182	mRNA	down	1
Sh2d3c	ENSRNOG00000054560	mRNA	down	1
Pacc1	ENSRNOG00000003915	mRNA	down	1
Arvcf	ENSRNOG00000001888	mRNA	down	1
Mta2	ENSRNOG00000019913	mRNA	down	1
Tlr12	ENSRNOG00000042455	mRNA	down	1
Spib	ENSRNOG00000019660	mRNA	down	1
Slc43a2	ENSRNOG00000003835	mRNA	down	1
Aurkb	ENSRNOG00000005659	mRNA	down	1
Gucy2d	ENSRNOG00000007931	mRNA	down	1
Rsl1	ENSRNOG00000057159	mRNA	down	1
Vav2	ENSRNOG00000007422	mRNA	down	1
Cdca8	ENSRNOG00000031431	mRNA	down	1
Bpi	ENSRNOG00000034195	mRNA	down	1
Rasgrp2	ENSRNOG00000021098	mRNA	down	1
Map4k2	ENSRNOG00000021061	mRNA	down	1
Rbck1	ENSRNOG00000006695	mRNA	down	1
Mzb1	ENSRNOG00000022009	mRNA	down	1
Jak3	ENSRNOG00000018669	mRNA	down	1
Cyp11b3	ENSRNOG00000030111	mRNA	down	1
Evi2b	ENSRNOG00000014125	mRNA	down	1
Itgb7	ENSRNOG00000012208	mRNA	down	1
Msh3	ENSRNOG00000013673	mRNA	down	1
Plek	ENSRNOG00000005214	mRNA	down	1
Fgr	ENSRNOG00000009912	mRNA	down	1
Cd74	ENSRNOG00000018735	mRNA	down	1
Parvg	ENSRNOG00000052064	mRNA	down	1
Arid1b	ENSRNOG00000017030	mRNA	down	1
Evl	ENSRNOG00000014476	mRNA	down	1
Cdc42se2	ENSRNOG00000042449	mRNA	down	1
Arhgap17	ENSRNOG00000013836	mRNA	down	1
Nsd2	ENSRNOG00000038140	mRNA	down	1
Abcb11	ENSRNOG00000050860	mRNA	down	1
Map3k1	ENSRNOG00000013177	mRNA	down	1
Ly86	ENSRNOG00000000137	mRNA	down	1
Fam53b	ENSRNOG00000061348	mRNA	down	1
Sting1	ENSRNOG00000042137	mRNA	down	1
Ubash3a	ENSRNOG00000001167	mRNA	down	1
Il16	ENSRNOG00000011680	mRNA	down	1
Laptm5	ENSRNOG00000011054	mRNA	down	1
Emid1	ENSRNOG00000033575	mRNA	down	1
LOC108348082	ENSRNOG00000006612	mRNA	down	1
Fam78a	ENSRNOG00000023352	mRNA	down	1
Camkv	ENSRNOG00000058938	mRNA	down	1
Inpp5d	ENSRNOG00000017020	mRNA	down	1
Arhgap45	ENSRNOG00000013220	mRNA	down	1
Lrfn2	ENSRNOG00000011803	mRNA	down	1
Atp2a3	ENSRNOG00000017912	mRNA	down	1
Psd4	ENSRNOG00000006079	mRNA	down	1
Lyz2	ENSRNOG00000005825	mRNA	down	1
Ciita	ENSRNOG00000002659	mRNA	down	1
AABR07072264.1	ENSRNOG00000042711	mRNA	down	1
Smarcd2	ENSRNOG00000010557	mRNA	down	1
Mapkapk2	ENSRNOG00000004726	mRNA	down	1
Rasa3	ENSRNOG00000017671	mRNA	down	1
RT1-Db2	ENSRNOG00000030431	mRNA	down	1
Arid3a	ENSRNOG00000026435	mRNA	down	1
Syvn1	ENSRNOG00000020950	mRNA	down	1
Carmil2	ENSRNOG00000024452	mRNA	down	1
Ttc29	ENSRNOG00000012342	mRNA	down	1
Ptpn6	ENSRNOG00000014294	mRNA	down	1
Rps6ka1	ENSRNOG00000042411	mRNA	down	1
Slc4a10	ENSRNOG00000005307	mRNA	down	1
Gpr132	ENSRNOG00000013914	mRNA	down	1
Klhl25	ENSRNOG00000010959	mRNA	down	1
Siglec10	ENSRNOG00000037339	mRNA	down	1
Cela2a	ENSRNOG00000013628	mRNA	down	1
Arid3b-AS4	TCONS_00203051	lncRNA	down	1
Cfap44-AS2	TCONS_00042394	lncRNA	down	1
LINC613	TCONS_00035860	lncRNA	down	1
LINC861	TCONS_00047054	lncRNA	down	1
AABR07065387.1-202	ENSRNOT00000078853	lncRNA	down	1
AABR07008142.1-OT1	TCONS_00107444	lncRNA	down	1
LINC2627	TCONS_00140659	lncRNA	down	1
LINC2601	TCONS_00139551	lncRNA	down	1
Tex44-OT2	TCONS_00216637	lncRNA	down	1
Tnfrsf13b-AS1	TCONS_00035940	lncRNA	down	1
LINC2868	TCONS_00155593	lncRNA	down	1
AABR07065883.1-OT3	TCONS_00186925	lncRNA	down	1
AABR07034739.1-AS3	TCONS_00047063	lncRNA	down	1
Clec4g-AS1	TCONS_00047520	lncRNA	down	1
LOC499573-OT1	TCONS_00116808	lncRNA	down	1
AABR07013095.1-AS1	TCONS_00112876	lncRNA	down	1
LINC945	TCONS_00051471	lncRNA	down	1
LINC4109	TCONS_00222070	lncRNA	down	1
Slc16a6-OT2	TCONS_00039471	lncRNA	down	1
LINC1934	TCONS_00104112	lncRNA	down	1
LOC108351936-OT5	TCONS_00220175	lncRNA	down	1
AC109901.1-AS1	TCONS_00047036	lncRNA	down	1

## Sheet: 14d ceRNA
RNA_name	shared name	type	up_down	Degree
rno-miR-483-3p	rno-miR-483-3p	sRNA	up	31
rno-miR-466b-5p	rno-miR-466b-5p	sRNA	up	28
rno-miR-204-5p	rno-miR-204-5p	sRNA	up	27
rno-miR-140-3p	rno-miR-140-3p	sRNA	up	19
rno-miR-29c-3p	rno-miR-29c-3p	sRNA	up	18
rno-miR-29a-3p	rno-miR-29a-3p	sRNA	up	17
rno-miR-122b	rno-miR-122b	sRNA	up	17
rno-miR-20b-3p	rno-miR-20b-3p	sRNA	down	13
rno-miR-92b-3p	rno-miR-92b-3p	sRNA	up	12
rno-miR-191a-3p	rno-miR-191a-3p	sRNA	down	11
rno-miR-449a-5p	rno-miR-449a-5p	sRNA	down	9
rno-miR-205	rno-miR-205	sRNA	down	9
rno-miR-17-2-3p	rno-miR-17-2-3p	sRNA	down	9
rno-miR-150-3p	rno-miR-150-3p	sRNA	down	8
LINC3000	TCONS_00162214	lncRNA	down	8
LINC3862	TCONS_00210497	lncRNA	down	8
LINC2877	TCONS_00156019	lncRNA	up	7
Smim5-OT2	TCONS_00032341	lncRNA	down	7
rno-miR-127-3p	rno-miR-127-3p	sRNA	up	6
LINC2079	TCONS_00110456	lncRNA	down	6
rno-miR-425-3p	rno-miR-425-3p	sRNA	down	5
Rmdn1-OT1	TCONS_00162021	lncRNA	up	5
AC123280.1-OT3	TCONS_00076620	lncRNA	up	5
AABR07033287.1-AS2	TCONS_00040996	lncRNA	down	5
LINC2135	TCONS_00113144	lncRNA	down	5
rno-miR-20b-5p	rno-miR-20b-5p	sRNA	down	4
Ctnnbip1-OT1	TCONS_00167338	lncRNA	down	4
Zfp873-OT2	TCONS_00194142	lncRNA	down	4
LINC747	TCONS_00042187	lncRNA	down	4
Slc9a7-OT1	TCONS_00223779	lncRNA	down	4
Gna13-OT1	TCONS_00032001	lncRNA	up	3
ENSRNOG00000004405-AS2	TCONS_00057893	lncRNA	down	3
Pax5-AS2	TCONS_00162678	lncRNA	down	3
LINC2461	TCONS_00130722	lncRNA	down	3
Cfap44-AS2	TCONS_00042394	lncRNA	down	3
LINC237	TCONS_00014591	lncRNA	down	3
Smim22-OT3	TCONS_00033489	lncRNA	down	3
Cfap44-AS1	TCONS_00042395	lncRNA	down	3
novel_circ_0004826	novel_circ_0004826	circRNA	up	2
novel_circ_0003824	novel_circ_0003824	circRNA	up	2
novel_circ_0006333	novel_circ_0006333	circRNA	up	2
Rbm38	ENSRNOG00000006420	mRNA	up	2
Spire1	ENSRNOG00000025324	mRNA	up	2
Csf1r	ENSRNOG00000018414	mRNA	up	2
Rflna	ENSRNOG00000001011	mRNA	up	2
Dgkg-AS1	TCONS_00046843	lncRNA	up	2
rno-miR-142-3p	rno-miR-142-3p	sRNA	down	2
LOC100910196-OT1	TCONS_00047752	lncRNA	up	2
LINC2563	TCONS_00136902	lncRNA	up	2
AABR07004130.1-201	ENSRNOT00000085207	lncRNA	up	2
Pbx3-OT4	TCONS_00139514	lncRNA	up	2
LINC1534	TCONS_00083866	lncRNA	up	2
novel_circ_0006390	novel_circ_0006390	circRNA	down	2
Katnal2	ENSRNOG00000017788	mRNA	down	2
Slc1a1	ENSRNOG00000014816	mRNA	down	2
Cmip	ENSRNOG00000013178	mRNA	down	2
Siglec10	ENSRNOG00000037339	mRNA	down	2
Ikzf3-OT1	TCONS_00038512	lncRNA	down	2
LOC102555023-203	ENSRNOT00000092884	lncRNA	down	2
LINC2805	TCONS_00150585	lncRNA	down	2
AABR07060980.1-OT1	TCONS_00150578	lncRNA	down	2
Smad2-OT1	TCONS_00096190	lncRNA	down	2
AABR07034739.1-AS3	TCONS_00047063	lncRNA	down	2
AABR07027799.1-OT1	TCONS_00091257	lncRNA	down	2
LINC2710	TCONS_00145650	lncRNA	down	2
LINC13	TCONS_00000279	lncRNA	down	2
LINC3082	TCONS_00168047	lncRNA	down	2
LINC1499	TCONS_00082000	lncRNA	down	2
LINC3616	TCONS_00195349	lncRNA	down	2
AC109901.1-AS1	TCONS_00047036	lncRNA	down	2
LINC3615	TCONS_00195348	lncRNA	down	2
AABR07064099.1-201	ENSRNOT00000079885	lncRNA	down	2
AABR07035780.2-202	ENSRNOT00000092040	lncRNA	down	2
AABR07051741.1-OT1	TCONS_00130894	lncRNA	down	2
novel_circ_0004995	novel_circ_0004995	circRNA	up	1
Abcg2	ENSRNOG00000007041	mRNA	up	1
Pdgfrb	ENSRNOG00000018461	mRNA	up	1
Serping1	ENSRNOG00000007457	mRNA	up	1
C1qb	ENSRNOG00000012749	mRNA	up	1
Mpp2	ENSRNOG00000059683	mRNA	up	1
Adamts5	ENSRNOG00000057794	mRNA	up	1
Cacna1e	ENSRNOG00000002863	mRNA	up	1
Gabrg3	ENSRNOG00000014862	mRNA	up	1
Gpx3	ENSRNOG00000052564	mRNA	up	1
Atp1b2	ENSRNOG00000011227	mRNA	up	1
Gstm7	ENSRNOG00000018937	mRNA	up	1
Fxyd3	ENSRNOG00000021095	mRNA	up	1
Cdh15	ENSRNOG00000027954	mRNA	up	1
Nmnat2	ENSRNOG00000027697	mRNA	up	1
Fnip2	ENSRNOG00000027833	mRNA	up	1
Asb1	ENSRNOG00000020322	mRNA	up	1
Avpi1	ENSRNOG00000014828	mRNA	up	1
Adam18-OT1	TCONS_00080557	lncRNA	up	1
LINC2559	TCONS_00136825	lncRNA	up	1
Slc16a7-AS1	TCONS_00189838	lncRNA	up	1
LINC2626	TCONS_00140500	lncRNA	up	1
LINC2020	TCONS_00107898	lncRNA	up	1
LINC3389	TCONS_00184221	lncRNA	up	1
novel_circ_0005419	novel_circ_0005419	circRNA	down	1
novel_circ_0005033	novel_circ_0005033	circRNA	down	1
novel_circ_0000103	novel_circ_0000103	circRNA	down	1
RT1-Ba	ENSRNOG00000000451	mRNA	down	1
Srebf2	ENSRNOG00000007400	mRNA	down	1
Arhgap17	ENSRNOG00000013836	mRNA	down	1
Dgkd	ENSRNOG00000023238	mRNA	down	1
Ephb6	ENSRNOG00000014367	mRNA	down	1
Pacc1	ENSRNOG00000003915	mRNA	down	1
Rbpms2	ENSRNOG00000015896	mRNA	down	1
Gucy1b2	ENSRNOG00000009440	mRNA	down	1
Aatk	ENSRNOG00000004392	mRNA	down	1
Glra1	ENSRNOG00000013588	mRNA	down	1
Stambpl1	ENSRNOG00000050224	mRNA	down	1
Nlk	ENSRNOG00000008704	mRNA	down	1
Nckap1l	ENSRNOG00000036829	mRNA	down	1
Reep2	ENSRNOG00000049629	mRNA	down	1
Cmtm7	ENSRNOG00000010986	mRNA	down	1
Tfeb	ENSRNOG00000014666	mRNA	down	1
Mapk10	ENSRNOG00000002079	mRNA	down	1
Ptprj	ENSRNOG00000034025	mRNA	down	1
Sit1	ENSRNOG00000021546	mRNA	down	1
Elk4	ENSRNOG00000007887	mRNA	down	1
Gnaz	ENSRNOG00000001313	mRNA	down	1
Pigr	ENSRNOG00000004405	mRNA	down	1
Myl9	ENSRNOG00000020246	mRNA	down	1
Nsg1	ENSRNOG00000005700	mRNA	down	1
Dusp5	ENSRNOG00000014061	mRNA	down	1
Arl5c	ENSRNOG00000036880	mRNA	down	1
Lck	ENSRNOG00000009705	mRNA	down	1
Ankrd44	ENSRNOG00000021384	mRNA	down	1
Sla2	ENSRNOG00000020337	mRNA	down	1
Xkr5	ENSRNOG00000028636	mRNA	down	1
AABR07013095.1-AS1	TCONS_00112876	lncRNA	down	1
AABR07022157.1-AS1	TCONS_00060943	lncRNA	down	1
LINC946	TCONS_00051498	lncRNA	down	1
LINC3707	TCONS_00199509	lncRNA	down	1
LINC3139	TCONS_00172747	lncRNA	down	1
Ighm-OT1	TCONS_00186653	lncRNA	down	1
AC099384.2-OT1	TCONS_00066306	lncRNA	down	1
LOC100361866-AS3	TCONS_00071077	lncRNA	down	1
LINC2640	TCONS_00141680	lncRNA	down	1
LINC840	TCONS_00046602	lncRNA	down	1
AABR07008142.1-OT1	TCONS_00107444	lncRNA	down	1
Muc20-OT1	TCONS_00042858	lncRNA	down	1
LINC2134	TCONS_00113143	lncRNA	down	1
LINC241	TCONS_00014691	lncRNA	down	1
LINC3190	TCONS_00175686	lncRNA	down	1
LINC2803	TCONS_00150582	lncRNA	down	1
AABR07006263.1-201	ENSRNOT00000089237	lncRNA	down	1
LINC2802	TCONS_00150581	lncRNA	down	1
Tut4-OT1	TCONS_00164793	lncRNA	down	1
Tmem236-AS1	TCONS_00092923	lncRNA	down	1
AABR07051308.1-202	ENSRNOT00000083718	lncRNA	down	1
LINC858	TCONS_00047051	lncRNA	down	1
